# Supplementary material for: A glycosylation-related signature predicts survival in pancreatic cancer
Source: publisher site journal article supplement (doi:10.18632/aging.205258), 2023-11-30
Supplement: Supplementary file [file aging-v15i23-205258-supplementary-material-SD5.pdf]

## SUPPLEMENTARY TABLE

Supplementary Table 4. Primers of genes.

---

|        |                                                       |
|--------|-------------------------------------------------------|
| SDC1   | F: GAGCTGAAAGGCCGGGAAC<br>R: CTGCTCGATGCTCTCTTGGG     |
| SEL1L  | F: GACTCCTTGCACTAACGCGA<br>R: TGCAAAAGGAAATGGTGATGTGT |
| TUBA1C | F: AATGGAGCAGCTGAGGGAAC<br>R: GCACTCACGCTTGTAATGGG    |
| GAPDH  | F: GGAGTCCACTGGCGTCTTCA<br>R: GTCATGAGTCCTTCCACGATACC |

---
