# Supplementary material for: A glycosylation-related signature predicts survival in pancreatic cancer
Source: Aging (Albany NY). 2023 Nov 30;15(23):13710–37. doi: 10.18632/aging.205258 (PMC10756102; doi:10.18632/aging.205258)
Supplement: Supplementary Table 1 [file aging-15-205258-s002.xlsx]

## Sheet: Sheet 1
Supplementary Table 1. GRGs expression profile of PC in TCGA.
Gene	TCGA-HZ-8002-01	TCGA-3A-A9IN-01	TCGA-HZ-8519-01	TCGA-FB-AAPY-01	TCGA-IB-A7LX-01	TCGA-XN-A8T5-01	TCGA-3A-A9IX-01	TCGA-3A-A9IB-01	TCGA-IB-7646-01	TCGA-2J-AAB4-01	TCGA-3A-A9IH-01	TCGA-IB-7890-01	TCGA-IB-AAUO-01	TCGA-HZ-A77O-01	TCGA-FB-AAPQ-01	TCGA-3A-A9IL-01	TCGA-HZ-8638-01	TCGA-FB-AAPS-01	TCGA-IB-A7M4-01	TCGA-IB-8126-01	TCGA-HZ-8636-01	TCGA-US-A77J-01	TCGA-HZ-A8P0-01	TCGA-IB-AAUS-01	TCGA-3E-AAAZ-01	TCGA-HZ-8001-01	TCGA-S4-A8RO-01	TCGA-IB-7889-01	TCGA-FB-AAPP-01	TCGA-FB-A4P6-01	TCGA-2L-AAQE-01	TCGA-IB-A5SO-01	TCGA-FB-AAPU-01	TCGA-IB-7886-01	TCGA-2J-AABR-01	TCGA-XD-AAUL-01	TCGA-F2-A8YN-01	TCGA-HZ-A49I-01	TCGA-2J-AABE-01	TCGA-2J-AAB8-01	TCGA-US-A774-01	TCGA-IB-AAUV-01	TCGA-2J-AABK-01	TCGA-FB-A5VM-01	TCGA-3A-A9I7-01	TCGA-IB-8127-01	TCGA-IB-AAUU-01	TCGA-IB-7651-01	TCGA-S4-A8RP-01
A4GNT	6.2807	0.104	0.3923	12.239	0.1296	5.6603	13.2986	0.774	0	5.3033	1.9473	0.3726	2.9316	2.1286	9.0818	1.3861	38.0034	3.5542	12.6902	23.5649	3.9591	0.2696	1.6195	0.8295	8.594	0.8447	1.4931	3.2579	0	17.0114	0.0822	32.9295	6.9255	1.2466	5.5786	1.9778	0.4619	8.1377	3.7628	1.3075	13.8565	0.4852	46.5711	0.1135	21.6274	0.9089	7.5889	0.8946	11.8338
ABCA2	21.0564	65.8876	51.3379	10.7471	22.8488	39.0337	21.971	20.7222	9.3656	27.4581	36.1551	53.2367	26.647	14.0762	10.2794	64.6881	15.3315	18.7065	14.649	8.3548	40.2125	20.4165	18.4457	15.6882	17.1852	15.7733	18.782	10.7079	11.7958	37.8047	27.4487	21.7703	11.5217	13.3529	20.5567	21.415	24.1109	28.5648	29.0148	16.4006	24.1196	24.4949	15.0899	14.4917	14.6936	23.418	13.684	23.2183	39.1671
ACAN	3.0207	1.6277	0.7102	0.2985	0.183	2.023	0.4286	3.2473	1.6945	0.2623	1.6843	4.347	0.88	0.5932	0.1189	0.1893	0.6433	7.3048	0.0722	0.5985	1.7516	1.4062	1.2051	2.3758	1.0327	1.8932	2.0429	1.3325	0.4982	0.6504	0.3552	1.6385	0.6207	2.6734	1.6597	2.9731	0.665	0.4395	2.697	4.092	1.6735	3.5982	0.3705	1.0359	0.9595	0.7528	0.2797	1.3797	2.4674
ACER2	6.1932	1.7351	4.9149	2.7409	4.7657	2.0988	3.6647	2.9361	15.4335	13.9611	9.2284	16.426	2.2019	2.0924	13.0988	2.86	22.4098	2.0489	4.4971	4.0181	13.0199	1.1242	1.8069	1.7485	29.7606	0.8709	10.9724	2.6901	7.8789	4.7157	7.8872	8.4005	20.3918	17.4952	8.0265	7.4485	6.1977	8.8688	3.3068	5.8159	5.4456	2.5345	4.944	0.5096	5.8555	9.6136	13.7005	8.3	7.5603
ACTR10	61.5258	40.6396	49.6054	25.8783	57.943	43.1374	36.995	55.0794	91.3724	41.0307	31.8726	70.6418	33.3366	32.0277	35.4758	40.4923	44.1476	44.8089	49.3292	19.987	67.6425	40.4926	24.1746	38.0839	41.058	50.0932	56.0004	44.6836	43.0294	45.8199	52.7737	32.1478	32.193	73.407	40.7693	47.0728	40.3808	51.0004	40.7977	46.0338	36.0278	47.9888	31.9653	32.1729	40.1282	62.7461	53.4641	47.5779	41.785
ACTR1A	111.48	64.4146	95.4968	63.8748	107.12	116.375	67.1674	116.069	75.3081	89.4149	106.899	136.522	84.0564	65.7735	68.048	77.8702	76.5387	101.401	73.6092	31.0985	102.595	92.4204	43.7002	106.967	95.4269	116.328	55.7313	113.176	86.9246	99.9263	135.579	91.2159	75.4789	99.7976	86.107	124.154	87.5635	102.723	94.8699	104.003	84.0488	104.679	71.5207	106.645	96.4921	117.448	130.962	92.5576	92.2784
ADAMTS1	103.15	112.161	103.27	17.3875	26.6384	125.524	56.1835	108.315	65.5043	33.1878	24.6356	29.2143	13.2204	11.8339	31.0048	22.7506	34.5605	38.3965	24.4753	49.2317	29.8651	83.6687	17.2721	92.8049	39.0811	37.787	17.6902	20.5021	3.7903	36.5793	11.2281	37.5285	12.1991	50.7149	121.658	18.0579	13.7261	24.8268	16.0218	34.7174	26.3985	83.4969	23.6415	37.1536	17.3358	17.0011	12.5224	16.1211	20.5993
ADAMTS10	17.6629	8.6932	9.9292	9.8167	18.4236	17.4238	11.3004	12.9703	2.3237	19.6623	11.7526	7.1375	69.3551	5.2994	5.3539	4.0536	5.4389	27.5795	5.9044	5.5898	13.57	16.3796	8.4313	18.2295	7.8147	10.122	11.4426	6.8105	0.4852	28.7719	6.7442	19.3929	1.5659	7.6048	23.3578	13.6138	9.1695	10.1809	13.7748	11.1445	15.3271	28.7555	8.748	5.1901	9.0231	11.1153	6.2313	4.1273	20.5265
ADAMTS12	29.1395	1.8175	11.275	9.6267	12.9427	12.3593	18.6749	24.6137	69.6896	10.9335	11.4773	79.9872	7.7276	11.4967	9.7365	1.6445	4.8064	43.0375	7.1707	3.7512	33.9841	11.3683	14.5997	32.8268	24.829	13.3652	10.8106	8.867	0.6381	18.762	14.3402	20.507	4.814	45.9995	18.3477	32.0187	25.4637	7.6905	27.562	53.1327	37.3532	26.2004	1.7662	12.5201	33.2403	40.0627	10.7432	39.3937	20.2103
ADAMTS13	1.9575	8.2131	3.6298	2.2927	2.9613	3.6577	2.581	1.7096	0.5161	5.312	2.9268	2.0074	3.9779	1.2519	1.6115	16.93	3.1011	3.2911	2.8251	1.2041	5.4334	3.5151	2.1945	3.1023	3.4605	2.0873	3.4408	1.1564	3.9662	6.1528	3.8701	3.514	3.0958	1.4327	2.9034	3.2647	2.711	5.7142	4.7231	3.2601	3.3148	4.5254	4.2075	1.6034	2.9683	3.9813	2.0086	2.9527	11.5564
ADAMTS14	12.503	0.4544	6.0324	6.6942	13.9834	9.1452	7.8054	30.6004	5.572	12.9173	6.4648	10.8886	21.3913	7.2532	4.3223	4.2028	4.8269	49.9345	4.4423	1.2579	12.2926	8.9472	12.3663	18.6595	32.4105	11.2233	21.2296	4.0109	0.8525	10.4268	10.9209	10.7537	4.4888	9.264	9.1921	11.4604	11.7604	16.7182	30.4782	18.8058	12.5143	18.3642	2.1707	15.9351	32.6072	7.2785	3.5469	3.4899	10.9372
ADAMTS15	19.2822	3.2185	9.3507	1.3196	5.0653	12.8647	7.8193	17.5496	3.2455	12.2608	14.2812	12.2357	4.7873	8.3222	4.9268	0.8928	3.224	4.0383	0.7075	6.0653	3.4951	11.0893	4.6479	8.2496	5.2031	13.6889	11.4362	4.834	0.2788	7.2884	10.1347	3.4889	2.1285	1.6371	5.1123	1.941	6.3969	7.7787	5.5442	8.8839	4.4084	10.4543	4.1292	20.676	3.5881	4.8533	4.5443	1.2732	4.1285
ADAMTS16	7.6582	0.3998	2.2619	1.1891	1.6512	11.9436	5.0623	4.0436	1.7307	0.5105	0.953	2.3904	0.4122	0.9896	0.5431	1.3413	1.0183	5.658	0.9412	6.0945	0.9489	6.3535	0.5448	5.6451	7.8516	9.2634	0.302	1.3821	0.118	3.6111	1.6219	13.7567	0.8288	2.9434	0.9367	0.9668	2.4058	0.2677	2.4711	3.4384	2.3822	73.7736	0.6897	1.8594	15.4025	4.8376	0.405	0.3759	1.4363
ADAMTS17	0.8385	0.3676	0.7881	0.7288	1.0623	0.9029	1.2048	0.6921	0.3219	1.2486	0.5994	0.4628	0.7884	0.9464	0.9277	0.1271	1.4884	1.4854	0.4869	1.0227	0.7054	0.8003	0.7017	1.2563	0.8579	0.7228	1.3144	0.5693	0.0825	1.3359	0.8806	2.0365	1.2345	0.19	0.8269	0.4737	0.5713	0.9875	0.9727	1.3862	0.8964	1.6019	1.1227	0.8101	0.9256	0.5157	0.4933	0.6955	0.8469
ADAMTS18	0.5854	0.3272	0.5568	0.3205	0.6288	0.8401	0.2282	1.2431	0.1364	0.3057	0.1948	0.6172	0.1639	0.0185	0.1072	0.7576	0.3823	0.8194	0.2281	0.4659	0.3229	0.4361	0.598	1.1396	0.4398	1.3584	0.2074	0.1545	0.0599	0.9626	0.4767	1.4235	0.1637	0.9664	0.2629	0.3753	0.3113	0.2247	0.5003	0.4466	0.5518	2.392	0.2616	0.1326	1.1948	0.9339	0.7403	0.3835	0.5185
ADAMTS19	0.0512	0.0572	0.0341	0	0	0.1885	0.0598	0.0222	0	0.0845	0.0104	0	0.0354	0.0113	0.2406	0.0124	0.0624	0	0.0665	0.0079	0	0	0.0232	0	0.1138	0	0	0	0	0.0462	0.0136	0.0295	0.0091	0	0.0715	0.0121	0	0	0	0.0575	0.0111	0.08	0.0366	0	0.0764	0.0081	0.0126	0	0
ADAMTS2	63.6141	25.3362	47.4983	28.2897	27.2139	77.0183	57.6991	49.1997	108.655	52.179	34.2647	142.202	30.163	32.5508	23.5863	41.2891	19.027	100.502	15.8401	12.6682	85.2485	39.571	33.1359	98.2977	37.3987	60.012	39.2214	25.3095	2.4277	78.7781	34.4727	47.79	12.0597	76.2959	50.7683	88.5029	45.3293	29.9832	63.9951	103.404	78.9666	111.688	7.2551	44.3277	54.9062	82.4735	30.7944	103.566	55.7068
ADAMTS20	0.0092	0.0164	0.0098	0	0.0102	0	0.0143	0.008	0	0.0086	0	0.1007	0	0	0	0	0.0056	0.0731	0.0191	0.0113	0.0157	0	0.0083	0	0.0148	0.0143	0.0107	0.0071	0	0	0.0097	0.0071	0.0065	0.0092	0	0.0087	0.0091	0.0116	0.0244	0	0	0	0	0	0.1016	0	0	0.0108	0
ADAMTS3	3.9274	0.5986	3.8534	0.3996	0.3618	1.859	1.7803	2.6486	1.3313	0.5572	0.4465	1.4461	0.0908	0.5579	0.3534	0.2758	0.666	1.6347	0.1943	0.9383	1.2163	1.1864	0.438	1.6848	0.8202	1.2408	0.4365	0.8425	0.1129	2.1506	0.5324	1.0451	0.1191	1.0287	1.5539	0.7067	0.3322	1.2322	0.4973	0.7525	0.9029	2.6043	0.373	0.7971	0.9152	0.7422	0.5035	0.9784	1.0766
ADAMTS4	22.9503	14.2249	18.5384	13.477	9.3644	50.9449	15.858	50.5146	49.3845	13.4814	10.2257	28.9917	8.6009	8.5488	20.0659	5.5635	6.2022	38.8602	5.6778	19.9866	12.7157	23.4133	14.3279	71.1196	12.2683	16.5706	17.7368	3.8414	1.4918	12.2878	8.6535	24.7607	10.2796	29.0484	42.1835	15.2272	13.2134	19.4194	21.767	26.6102	15.8945	15.7732	13.6574	21.9629	9.5262	15.6455	8.7936	8.412	13.1857
ADAMTS5	6.1308	1.7245	3.066	0.9598	1.6366	4.9005	1.3435	8.1478	5.9581	2.2522	1.7623	9.9109	0.8467	1.8576	2.2342	1.3582	1.9031	5.0675	1.9816	1.0842	6.643	1.3179	4.201	8.6281	2.8114	4.9903	1.9866	1.231	0.2531	4.6041	1.4907	3.418	0.9651	4.3081	2.2793	2.302	2.4191	1.1699	2.5824	4.0018	2.1332	3.6302	1.4292	1.4127	2.1146	1.5888	1.9522	2.7791	2.8656
ADAMTS6	2.1903	1.0155	1.8057	0.9475	2.7719	1.9307	1.425	3.0335	2.7038	0.866	1.2264	4.4446	1.6857	1.1837	2.2306	1.5407	2.3955	7.6926	1.3723	0.8274	2.9784	0.8213	0.4753	2.6008	2.8339	0.9963	1.1184	0.9962	1.5813	1.425	1.2298	2.1993	1.1806	6.3116	0.9	1.8638	1.6468	1.8124	7.8048	5.2686	2.0906	1.9434	0.737	0.6914	2.8093	3.3217	1.4495	0.8862	3.8918
ADAMTS7	4.8884	4.0063	3.0865	3.5717	12.0298	6.8334	4.3514	10.3533	5.1566	3.7145	6.401	15.4127	6.7619	5.9738	3.1762	3.0059	4.1449	25.1057	4.0175	1.0948	10.045	5.2535	7.2961	15.7383	9.9445	4.3224	7.7485	3.2227	1.3504	5.2641	8.7947	11.146	2.9793	7.4397	5.3019	17.6242	8.0471	8.1029	10.0797	10.3314	11.1297	11.6706	1.2329	9.3051	13.6311	13.1108	6.1023	5.9582	9.1222
ADAMTS8	11.9255	1.2215	4.7461	1.2834	3.1913	57.8251	15.2178	24.6928	1.403	3.6139	10.403	1.5322	2.4268	1.2832	2.8479	1.2714	18.3978	6.1077	0.8654	5.7216	4.2164	8.2426	1.7696	5.532	29.496	7.1539	7.5614	3.6416	0.0955	3.9699	1.3778	7.1887	1.2091	2.3766	7.5854	2.9109	0.2976	5.8337	0.7308	3.6324	5.9528	7.8309	1.3338	2.1289	6.1658	2.1002	3.4568	1.3304	6.3337
ADAMTS9	28.1115	2.6222	20.2803	9.2142	4.561	28.147	14.5799	25.4267	7.7156	11.3865	7.4028	11.8105	5.6575	7.3372	7.1885	3.7192	13.9559	18.173	2.4896	7.9345	22.3615	9.5205	11.0542	25.7591	15.8096	15.7636	19.1134	5.1103	1.3422	20.0687	5.6231	9.763	5.5658	7.1837	15.5626	14.5077	10.1745	14.0696	13.2224	7.7681	10.3614	14.46	12.3104	8.897	5.5911	9.7144	4.8531	9.2278	12.2296
ADAMTSL1	5.8066	2.7204	6.251	1.1348	0.8914	4.404	2.8592	4.0383	4.9173	0.7404	1.5209	5.1623	1.3245	0.5769	0.9472	0.4709	2.3702	7.265	0.485	1.7018	3.0725	2.4196	0.7592	5.5449	4.6727	3.7678	1.0596	1.361	0.0735	2.6953	0.9901	5.2447	0.5147	1.7731	2.5726	1.7396	2.0827	2.4647	1.6708	3.4253	2.5036	7.5836	1.4377	1.8868	2.8877	1.5569	1.1403	1.2019	1.6831
ADAMTSL2	35.0975	68.1342	94.0187	22.7636	22.6867	39.643	26.7751	17.7412	6.7885	65.678	32.9844	36.2226	12.3615	12.7455	16.6924	282.628	5.25	52.4312	9.1023	13.0527	62.1358	59.9394	29.0321	36.1191	21.1407	26.851	35.6944	17.4754	1.839	57.5435	26.7443	53.2672	16.9496	13.0254	41.1823	46.6977	21.0669	47.1387	28.8604	23.9719	34.8524	54.8481	18.3681	36.633	13.2328	45.8705	36.989	57.0813	79.7097
ADAMTSL3	12.9003	4.9338	7.6733	1.0255	1.4733	4.5471	5.3206	2.1609	2.6684	2.7689	1.9652	2.2917	0.7826	2.5991	0.9312	3.6357	4.001	1.7102	0.948	5.1481	4.8129	2.9017	1.4258	4.4819	5.5272	2.614	1.2133	2.79	0.1014	4.9934	0.5926	8.0639	0.6594	5.053	4.3177	1.1358	1.6711	3.4966	1.7114	1.4788	4.419	9.2614	1.1884	0.4485	2.9741	4.2036	1.6001	2.3978	4.1466
ADAMTSL4	10.5944	3.1073	6.8879	6.7525	8.517	11.2461	6.9133	18.7364	6.2085	7.587	6.2111	15.1498	13.4977	7.3022	4.1437	1.5335	7.8834	17.1107	16.7696	3.239	17.2813	6.4625	5.9787	31.5516	21.471	7.4427	19.0345	2.8618	0.6455	21.1633	4.9698	7.1031	3.0831	8.8033	9.2878	14.6177	13.9029	27.1041	39.6476	12.3199	9.3261	9.4411	4.263	6.0683	9.6679	21.3689	16.6125	11.1538	15.1788
ADAMTSL5	1.5428	1.4139	1.2783	2.6041	11.5854	3.4442	2.064	9.6058	2.1243	8.3556	2.3917	8.3948	4.7425	6.612	2.8335	0.1841	2.1597	5.2639	14.1518	0.5895	5.5738	1.9427	9.2709	3.1438	10.1858	1.5562	14.4492	2.9197	4.6413	4.9871	11.6964	3.3998	5.6934	4.4596	2.6876	7.4676	5.2946	11.0307	9.1167	12.2909	2.9341	1.6855	3.6091	3.4753	9.9432	6.1674	8.4124	7.7537	15.9157
AGER	7.7447	13.1693	6.3911	9.5291	19.4396	12.9557	6.2449	6.6647	1.2225	8.9681	3.4198	1.9624	17.9006	4.4446	5.5129	9.5392	9.0574	16.6051	7.1497	3.2095	6.0756	14.4078	7.1837	9.8209	4.9748	10.2421	7.642	3.7501	5.3837	14.7647	7.4382	7.7485	3.5957	2.7054	6.826	8.7608	5.2797	12.1464	10.2525	13.6014	4.7749	8.735	8.5322	9.9888	6.4359	7.0977	6.8987	1.9863	19.1923
AGRN	64.3884	28.839	51.5377	63.6793	406.253	83.5909	74.7544	262.066	31.8468	174.93	207.623	133.558	261.266	113.571	56.9985	32.4899	74.857	92.9911	101.76	27.044	213.379	86.7183	92.5287	97.6309	66.869	37.0501	92.379	44.3099	36.6005	170.567	188.773	96.6584	35.8483	37.4707	173.106	217.661	146.62	269.387	177.15	81.2175	164.584	66.4679	68.2333	81.4529	110.74	137.606	129.058	99.8956	117.985
ALG1	11.4226	5.8638	11.9974	7.788	13.2381	12.5383	9.8932	13.5718	12.4279	7.8403	12.8844	13.6613	11.0885	16.352	8.211	9.2433	14.0436	7.7413	15.1961	4.7319	12.7364	10.8491	8.6864	11.3637	13.4679	11.1201	8.5784	11.8869	18.0246	13.1107	20.5482	10.0786	12.3124	11.8898	12.1649	9.9683	9.7253	12.5488	11.1346	13.8487	14.218	9.3287	8.3047	6.2722	10.8464	15.4736	10.7192	11.8576	12.117
ALG10	4.1691	1.0129	2.0108	0.952	4.1141	1.8468	2.0985	1.9376	4.7127	1.0994	2.553	3.8988	1.4077	2.0204	1.6559	0.8247	3.6622	1.0032	2.5243	1.2496	3.7467	1.0273	0.8645	1.7057	1.5935	2.0563	3.5822	1.507	2.2351	2.2525	1.3404	1.0355	1.8574	7.3231	2.4077	1.6436	1.6784	0.8717	1.5276	1.9559	0.9943	1.4525	1.5257	1.6335	2.0021	3.5778	1.776	3.0398	1.7327
ALG10B	6.3837	2.8273	4.1506	1.3909	7.4321	2.9049	3.3767	2.2654	5.2261	2.046	3.2657	5.3077	2.5988	1.3617	3.0064	3.9071	6.7224	1.9291	3.4122	2.0211	7.6021	1.9739	1.6022	2.091	2.7756	2.107	3.9896	2.0641	2.933	6.2724	2.0467	2.1399	0.9854	5.3251	3.0725	2.0025	1.5509	5.0972	2.5087	3.5951	2.1896	2.9461	2.5232	1.2194	2.3411	4.1575	2.3683	3.6865	4.6282
ALG11	2.9959	0.6292	1.9704	0.855	2.2271	1.2957	1.3803	0.8855	2.1563	1.6261	1.5104	3.1394	0.8705	1.1474	1.5639	1.4163	2.2659	0.8491	1.2489	0.9435	2.7772	0.6387	0.9743	1.1708	1.4799	0.9671	1.4711	0.8257	0.9412	1.7891	1.8032	1.4254	1.5522	2.1798	1.4251	1.213	1.199	1.0008	1.2784	2.465	1.5678	1.3101	0.872	0.6178	1.2652	1.4451	1.5859	2.1195	1.797
ALG12	9.0581	5.9139	6.2099	4.2887	7.7121	6.7943	6.2242	7.1548	4.8515	7.1048	4.1722	10.9266	4.4748	6.7723	6.2616	4.0763	8.1881	6.0346	4.6928	3.1237	5.8188	6.7188	5.5933	7.0534	6.857	5.0244	4.893	4.1281	9.1812	10.9352	5.0229	6.4811	2.947	6.7095	6.996	6.1612	4.8816	8.2792	8.8257	4.9169	8.8802	7.9347	4.1636	3.3332	6.6446	5.5264	4.8622	7.909	6.3032
ALG13	12.6183	12.114	13.0154	7.9425	18.7765	14.1258	9.4299	8.8689	9.5142	12.7541	9.5193	8.489	10.7273	7.0937	9.9956	19.2091	18.5885	11.0685	5.3393	6.3191	19.9652	9.2257	9.4925	11.088	8.7228	8.6191	29.5115	8.2976	11.2648	16.5942	9.5321	10.2458	8.3028	15.9383	12.6031	8.4589	7.6014	10.8214	11.4007	10.3406	11.0655	12.7772	10.534	4.3148	9.4554	12.4415	13.1326	6.9476	29.3429
ALG14	3.9561	3.8581	3.536	2.4896	1.5221	3.8616	2.7607	3.1483	2.8773	2.6793	3.3556	3.1235	3.4701	3.4589	2.2752	4.6246	5.4339	2.899	2.0889	2.152	3.4625	3.4575	2.7739	3.3163	2.6739	4.1972	2.3795	4.5422	3.1788	3.2036	3.4749	3.1372	3.8083	2.9833	3.5579	3.1764	2.017	3.5821	2.14	4.4715	3.3988	3.4211	2.6394	2.8199	3.765	2.1577	3.1314	3.2	3.7122
ALG2	56.5702	77.0333	54.1263	21.8391	23.3602	48.0883	44.3365	26.3455	91.7487	37.1117	47.9914	53.6935	47.9267	27.1656	41.8517	51.4765	48.8116	30.5457	34.0007	24.4356	55.9389	34.2353	42.1544	45.9239	43.1922	43.2593	57.7274	45.8597	56.3535	45.9582	37.5099	35.018	49.6971	39.6934	46.0029	27.5764	25.8438	42.8417	33.1905	48.5054	43.0268	46.2685	40.1	35.2561	33.8325	48.7351	28.8044	44.7382	49.5888
ALG3	29.7045	34.2078	35.5022	31.3772	46.9001	30.4285	32.3545	55.8297	74.5825	38.4746	45.7665	41.4693	106.937	49.2146	37.2397	40.1803	34.3052	29.5467	63.8489	9.8726	48.3776	34.4038	37.1796	45.0094	41.7157	43.4777	64.1848	38.5367	75.4541	41.5254	53.0349	28.5511	69.0608	34.3621	43.2264	43.0732	44.2931	51.7708	45.7828	68.0428	47.6976	27.0688	35.0276	104.75	40.3214	32.1667	43.1402	39.9344	39.3526
ALG5	54.9048	33.6764	61.9451	44.0579	58.2701	55.7769	52.8528	35.3406	40.9333	54.5667	68.346	56.2409	52.8548	84.9484	49.2129	59.1775	74.6479	42.2656	44.203	34.6346	41.7043	56.9694	46.0676	51.0253	52.9723	65.4546	55.887	73.4383	85.2119	51.8033	68.4921	52.8252	62.9026	47.2188	51.2212	49.269	42.2611	57.2672	43.9379	79.5861	57.6536	45.9541	45.0714	48.9856	38.7632	40.2942	58.5979	53.4114	58.8982
ALG6	11.7906	3.4625	6.2063	4.4576	6.0771	7.004	6.9575	6.2846	5.4583	7.9568	5.4173	6.7308	7.662	4.7975	2.1923	4.2997	11.2334	5.411	6.1259	3.7501	6.8173	7.5172	5.6387	6.3649	3.8948	5.3501	3.7701	6.7877	8.1437	7.1269	6.6389	5.7637	7.3534	6.947	8.6396	7.1367	4.9416	7.2635	6.6179	5.8219	6.1895	6.3144	5.9499	5.0284	5.4467	6.0054	5.3784	7.3852	7.7854
ALG8	39.2861	12.3334	31.6859	22.7858	25.5885	26.3641	24.4701	29.6464	42.1872	32.3533	32.1019	27.878	21.2563	31.1505	23.9564	17.8574	31.61	19.4672	36.22	11.6744	30.5482	23.9042	20.5493	23.3008	24.6156	26.5452	36.0009	26.2791	37.4065	29.9678	31.674	18.4895	44.0358	52.4276	25.3973	24.5402	26.684	29.8051	26.5954	35.3766	25.2728	20.4962	23.9483	28.6507	24.9615	33.6692	29.7118	29.4945	27.9138
ALG9	4.2135	3.0881	3.5142	1.2888	1.609	3.0794	2.5319	2.003	1.7137	2.1527	1.8902	2.4642	1.2137	1.7256	1.8851	3.5264	2.902	2.4868	2.3535	1.7034	3.1024	2.2485	1.3271	1.8808	2.3924	2.1613	2.4537	2.1945	2.0826	3.4414	1.5047	1.6833	1.6544	2.6881	2.2685	1.7359	1.4678	2.2478	1.8294	1.8447	2.4259	2.3071	2.0961	2.0931	2.5151	2.0362	1.5721	1.7547	2.7826
AMDHD2	5.687	7.6011	6.7817	9.2671	8.9749	13.3304	6.7365	12.6563	2.3616	7.3918	9.3166	8.9144	14.1306	6.6588	11.2907	8.3803	5.2869	18.3862	13.5755	2.7476	8.1203	11.5346	5.1212	22.6615	9.5468	5.974	5.7521	4.0071	8.378	12.3798	15.4472	10.9869	5.6101	4.6035	8.1655	14.5953	10.8211	8.0299	12.6647	8.3112	12.2491	14.1345	6.2124	11.9608	10.2947	8.5183	10.5353	7.3653	9.262
AMFR	79.8342	40.8093	45.6822	51.2591	75.833	65.5406	56.5666	73.8654	54.8608	69.208	94.2636	112.93	52.9009	56.0546	53.6163	45.9179	54.0566	56.0155	53.7675	23.9037	89.135	68.6911	34.254	61.6279	55.0436	56.5068	71.3617	73.028	64.7691	83.8836	53.1385	50.1452	58.8601	69.3661	73.3386	78.3349	57.1522	67.2873	64.4354	64.9335	62.358	62.2379	45.6457	50.1238	75.2907	83.6529	77.1153	50.6761	72.4721
ANK1	1.7695	4.5191	1.742	1.789	5.0097	2.1733	1.24	5.6113	4.1836	1.2414	9.8997	1.6226	5.4961	3.1848	3.244	0.4074	1.3162	0.4838	0.6704	0.5535	4.5664	1.8435	1.92	1.0674	6.4238	0.671	25.3027	6.0639	0.4029	0.9228	0.6843	1.3908	3.6052	1.8743	2.7665	0.9897	1.1859	3.5217	1.8175	0.9623	0.5252	0.6738	2.7451	1.3712	2.0705	4.1529	12.259	6.6181	2.5348
ANK2	11.08	7.3156	7.2318	1.2843	0.524	11.0106	5.4798	2.7907	2.9953	1.2483	1.3845	4.0379	0.3495	0.5664	0.6192	11.0498	3.5629	3.5117	0.8616	2.7608	2.5528	7.5269	0.8697	2.986	5.0733	5.085	1.1375	1.7353	0.2377	5.292	1.8341	3.4264	0.3372	1.6153	3.4419	1.2692	0.5476	2.2124	1.0799	1.537	2.0296	10.9596	1.0575	3.969	3.6314	1.7048	1.3382	1.5959	1.8422
ANK3	5.821	1.7457	7.5856	2.0832	2.24	4.7807	2.8576	1.0761	3.6215	3.0008	2.2992	1.6764	1.9481	1.361	2.2067	2.1293	6.8897	0.9498	2.4484	2.2606	4.2807	1.1016	0.9701	1.5822	2.4738	1.2188	2.3124	1.6959	1.443	7.1459	1.5789	2.3298	4.2437	4.6493	3.6844	2.3903	3.4715	1.9772	1.844	2.8234	3.3112	2.1731	2.9464	0.7263	4.2183	2.6603	5.2991	3.94	4.6517
ANKRD28	21.8792	5.6783	13.5788	6.4212	20.9934	17.254	14.0716	14.3243	12.8304	10.2942	11.6049	18.7614	13.2383	10.5242	6.5889	8.7651	11.9207	14.9288	14.1864	8.2723	17.6732	9.7829	6.4875	14.5077	17.6115	8.448	17.6819	10.9273	9.3722	16.4566	14.2196	9.7881	11.4965	18.3099	16.2012	13.764	10.8451	11.3383	12.6862	12.6521	12.2698	19.9503	7.2075	11.5719	10.9303	13.8363	16.6477	11.78	15.7762
APOB	0.2279	0.624	0.1239	0.2505	0.0104	0.2741	0.0326	1.5383	0.1159	0.0395	0.0678	0.0766	0.2702	0.0412	0.517	0.0539	5.8553	0.0494	0.1112	0.5125	0.0639	0.0539	0.0296	0.1469	0.2145	0.1846	0.038	0.1375	1.1734	0.294	3.0043	0.0823	0.4767	2.2949	0.7473	0.7646	2.6875	0.0294	0.0247	0.0209	1.1834	6.1575	0.1862	0.0136	236.191	0.6956	0.1235	0.1018	0.0532
APP	845.289	336.571	562.149	245.617	378.482	524.774	473.012	794.158	563.611	696.739	504.794	974.228	262.899	353.094	636.84	388.605	504.278	465.237	446.015	226.247	589.867	322.593	262.749	475.947	531.358	458.757	485.661	413.164	372.274	692.857	341.094	448.885	322.654	642.978	579.948	686.569	395.161	468.445	524.391	635.581	542.804	515.59	340.664	306.673	252.656	720.063	416.387	592.951	517.101
ARCN1	224.945	86.1106	178.023	85.0984	149.563	135.001	123.744	166.773	311.706	200.011	150.032	270.171	113.79	117.854	174.54	89.414	186.167	140.297	150.082	79.2998	237.826	95.5905	110.372	128.545	156.562	132.89	174.707	118.252	155.923	153.312	151.655	136.881	197.329	350.445	152.938	156.66	160.908	156.528	126.077	200.698	143.78	159.932	106.518	116.932	159.238	215.531	163.734	224.52	140.051
AREG	15.8776	13.7495	12.8194	18.1326	391.369	56.5431	30.1261	261.563	61.5967	125.218	95.3464	156.233	22.2337	92.1725	44.9604	4.8706	114.228	26.1741	84.8509	8.5017	119.672	158.461	28.7216	95.8188	17.4328	31.3442	50.296	32.2582	42.0847	15.1693	41.7415	112.169	37.158	38.5361	173.635	150.63	57.7959	570.16	38.2542	42.4038	30.8976	18.1345	25.5588	149.221	18.9891	168.849	66.2721	22.6907	22.7042
ARF1	464.383	420.081	568.008	370.961	598.151	475.678	362.991	557.962	800.766	691.789	715.087	580.42	574.361	483.194	599.793	354.313	501.514	498.767	460.4	164.061	631.739	438.517	632.529	571.112	612.219	378.126	538.404	455.119	695.756	562.537	522.826	591.456	639.055	619.909	429.638	623.526	561.75	581.925	678.109	623.073	467.798	438.877	413.763	597.634	543.837	536.073	642.154	553.794	604.082
ARF3	155.164	88.5548	143.721	85.2811	124.693	99.2852	101.919	109.017	112.454	150.476	111.578	124.115	115.51	71.9113	85.7617	178.41	99.2285	82.9893	98.1715	40.7885	117.487	93.4371	68.9723	102.516	127.903	91.2065	122.924	104.962	97.7388	120.051	148.636	97.4004	98.8769	102.668	110.012	129.851	72.5754	91.2193	135.003	146.247	89.772	103.998	105.123	113.644	102.471	198.485	124.13	119.409	116.123
ARF4	441.973	197.748	242.526	192.583	267.419	294.696	244.207	283.855	1156.91	373.646	402.917	461.041	200.048	251.578	252.905	128.977	475.293	422.237	333.352	135.902	609.799	202.012	302.051	362.723	314.579	402.103	532.433	289.236	342.486	252.44	359.144	269.957	248.814	431.94	313.75	399.678	387.95	416.66	304.884	427.507	303.149	475.238	207.068	222.89	327.138	391.067	299.813	418.322	320.078
ARF5	161.26	179.004	131.443	149.648	151.223	165.174	118.261	187.9	117.97	167.103	233.752	159.973	188.681	129.248	139.967	239.486	121.412	188.145	180.253	57.0298	186.902	186.635	111.877	161.178	169.658	180.558	195.962	209.987	255.411	157.637	278.042	125.112	184.562	174.119	157.385	160.018	182.039	178.005	187.768	144.79	149.887	160.424	144.893	289.017	138.002	190.256	219.697	122.47	190.144
ARFGAP1	44.2417	162.91	50.5407	53.9657	100.452	50.6213	35.7996	73.0722	22.1473	57.2895	49.3736	61.4456	90.0442	52.0396	63.6579	113.146	52.0694	113.125	75.3449	16.6628	52.8208	50.1748	39.1891	71.0992	61.429	57.3049	104.751	27.6284	102.434	72.4254	72.4065	54.9977	54.811	46.1445	43.06	73.7325	49.2556	88.9255	59.4028	65.2425	57.6912	68.7661	43.6229	96.3202	76.3372	70.2813	74.534	40.8208	75.1244
ARFGAP2	64.7056	44.5386	48.6912	38.684	71.5485	51.5609	43.3928	40.5858	42.8923	53.9174	56.2233	57.2054	48.4273	46.8445	41.7283	49.5732	45.1424	40.6622	61.3755	23.9133	57.077	56.4336	30.7544	45.9878	55.1385	54.3386	63.8178	53.6928	47.3419	68.3308	78.0426	44.3118	39.5803	70.7347	51.677	53.8384	44.0006	54.4069	50.4976	47.297	51.6183	43.9299	40.949	54.7183	45.609	65.8937	65.4463	47.3387	60.5341
ARFGAP3	89.1167	41.7075	59.1384	52.1187	102.772	69.745	60.0276	94.163	84.7801	113.592	59.971	131.095	42.2268	49.4134	112.563	35.3285	81.7517	65.1791	56.1004	44.4513	129.894	56.3681	53.3116	71.322	55.969	63.7353	73.6563	80.6705	90.9463	72.03	38.2166	69.2753	39.3524	142	139.804	62.1108	111.524	120.41	103.746	64.1511	67.656	76.1345	55.7493	65.321	85.181	132.737	80.8385	93.1875	56.9243
ARFGEF1	36.8087	8.8966	32.9255	12.5518	32.7436	20.2908	25.574	29.8875	27.5849	22.1985	22.3819	52.7902	17.9667	18.1699	23.3431	12.8362	32.8481	13.4651	25.2809	11.7969	32.4221	11.9698	11.8307	16.0441	32.2107	12.3359	33.4157	20.0512	20.48	31.3743	47.8084	23.3287	28.6018	50.6806	22.5221	23.9911	23.7689	19.5807	19.6846	20.851	21.5885	18.1343	17.3913	11.5312	21.5235	43.7382	26.6118	32.0482	39.1753
ARL6IP1	213.116	54.75	162.863	149.71	109.246	126.058	141.751	234.504	265.43	278.935	199.595	238.606	147.405	184.139	212.628	46.9966	274.509	113.632	247.942	82.0093	308.512	115.029	102.906	144.095	191.547	106.189	198.88	237.121	346.427	189.785	212.001	176.847	476.867	312.929	154.928	207.941	207.53	225.379	151.362	316.854	160.876	93.2544	320.481	86.8326	148.333	296.891	525.672	230.399	284.159
ARSB	17.6012	4.6442	6.8526	5.2402	4.6968	8.0661	8.6583	10.4275	14.5655	5.2351	4.1063	12.5248	3.352	3.8983	3.4456	5.7217	6.4964	11.2036	3.1329	3.5164	9.2582	7.1052	3.3641	18.5486	7.1794	10.8252	5.3186	6.3381	9.6538	10.706	5.1456	7.8292	1.9747	12.383	9.5389	7.7172	4.8935	5.684	7.5222	11.013	10.329	17.2015	2.66	4.9985	7.0472	7.8281	5.0163	11.3451	7.6097
ASGR1	1.9506	2.0902	2.2151	2.6835	1.312	1.7747	1.8937	3.2106	0.6987	1.1111	1.8336	0.7832	1.697	0.8637	1.9823	8.6241	1.0096	3.2029	1.3959	0.5353	1.9266	2.3674	1.3368	9.0369	1.459	2.334	2.6416	2.1191	1.0023	1.5285	2.4786	1.883	1.0477	1.4054	2.6222	2.3469	5.0422	5.5379	3.6699	2.7721	2.6913	3.3391	1.3158	3.3755	2.3231	2.5536	2.335	0.9908	2.4106
ASGR2	1.9112	0.4211	1.2098	0.4131	0.432	4.4892	1.49	1.659	1.4789	0.601	0.4488	0.5705	1.5581	0.2208	0.3789	0.6959	1.0638	1.6193	0.403	0.7544	1.9491	1.2199	0.83	4.7975	0.493	2.9312	0.2586	1.4225	0.2382	1.5005	2.027	0.6393	0.8871	0.7237	3.4052	1.5439	4.1798	1.1908	0.2578	0.4982	1.8218	2.7235	0.5546	1.5135	0.567	0.5967	1.0626	0.9014	0.8455
ATP6AP2	75.4554	132.363	59.9298	25.5758	41.5609	55.2103	47.1525	66.0288	105.399	55.6275	84.9206	97.1585	36.9442	37.8647	43.0516	77.1584	46.8922	61.8342	35.1098	23.0791	92.6053	41.3463	23.9993	59.6864	40.2362	59.1631	60.7854	58.3735	35.5817	53.9878	53.5518	45.833	31.573	79.1777	49.1207	54.3393	50.013	50.0081	45.0178	64.2324	45.9678	63.1359	35.7009	44.7739	45.7029	76.4762	55.8253	69.4826	48.0285
ATP6V0A2	6.611	3.1964	6.0095	2.4168	4.4857	6.2253	4.501	4.0203	3.4987	2.506	3.6808	4.522	3.2182	2.6717	2.5965	4.2742	4.2963	4.6527	5.1169	2.0633	6.1443	3.5431	3.3873	4.919	7.9027	4.028	6.1116	2.8339	4.0833	5.6359	3.5184	3.5357	7.3283	3.7121	4.0973	4.561	1.8019	4.1948	3.1269	3.9097	3.3148	5.3971	2.9307	2.8382	5.6356	5.8062	3.4445	4.867	5.5442
ATP6V1A	92.1592	22.7761	46.8602	22.3294	42.5012	40.882	47.0843	63.1319	109.997	49.27	43.0631	93.7345	44.3203	32.0663	52.0502	30.2485	51.9725	36.9343	55.2369	22.8222	72.3991	35.6713	25.6227	53.5266	44.4883	36.1805	48.1291	46.6584	30.3575	60.9311	49.7995	42.8777	34.7897	53.8083	51.2275	47.492	46.3879	46.469	43.3936	43.9207	48.2418	50.2622	33.7092	46.5644	41.9725	53.663	47.1156	60.5187	47.1854
ATP6V1E1	142.77	68.4754	121.568	98.9304	126.433	164.424	93.7828	120.382	187.456	135.121	159.871	164.628	87.9264	74.2322	157.254	83.4608	103.982	113.475	86.3999	41.3186	115.945	123.376	79.2697	131.262	118.556	145.498	137.015	143.564	65.5502	101.399	108.151	121.675	97.8432	130.497	111.283	153.78	83.1543	132.744	127.205	119.942	110.03	121.848	102.585	182.165	93.8891	121.375	94.1113	156.482	87.8298
B3GALNT2	9.5012	3.3126	7.0298	2.9577	5.6957	5.1947	7.7365	5.7776	5.0154	5.4628	4.6693	6.3015	3.9106	5.413	4.3483	3.8967	6.7532	5.2866	4.4205	3.6465	4.5719	3.2273	5.6178	5.1614	8.4249	5.1271	6.7032	4.7092	9.7331	5.222	6.4616	4.8577	6.6138	5.7648	5.643	3.873	3.7769	3.2919	4.3356	6.4569	4.8834	7.1012	3.4495	7.1753	5.3342	5.3911	5.4847	4.4783	6.8184
B3GALT1	0.352	0.2543	0.0721	0.1122	0.1056	0.8705	0.38	0.2821	0.0161	0.1916	0.1207	0.2417	0.0624	0.1918	0.1158	0	0.0248	0.2878	0.0563	0.243	0.1046	0.1569	0.0369	0.069	0.0438	0.0632	0.1264	0.2002	0	0.3178	0.0718	0.0833	0.0578	0.068	0.3972	0.1279	0.0538	0.1198	0.162	0.3044	0.2812	0.1815	0.3388	0.0793	0.0924	0.0343	0.1199	0.2483	0.155
B3GALT2	6.7844	2.1732	9.2357	4.5099	1.5159	3.5932	4.6222	0.3037	1.8912	1.6505	0.6457	0.6406	1.2548	0.5164	0.2327	1.3712	21.8638	0.6199	0.9494	2.2861	1.3012	1.2166	1.218	0.8912	0.692	2.8135	0.4991	1.5126	22.5138	17.972	0.1649	0.8674	0.249	2.012	5.7301	2.2955	0.1544	1.2536	0.3618	0.3059	2.086	3.145	2.627	0.9673	1.1773	0.6528	1.6062	1.1157	1.1867
B3GALT6	37.719	33.5143	34.9152	27.3614	20.9269	38.8959	26.9897	38.396	18.904	21.2943	30.2377	31.6332	42.7191	32.0733	8.703	58.1873	15.5588	45.7369	25.1417	7.5945	37.6435	46.4799	25.5658	42.0367	29.799	35.3574	27.0606	33.8638	28.9707	35.4306	49.4172	22.3413	9.1696	20.8288	37.1328	37.166	24.1174	30.7801	32.4295	33.9996	32.7905	49.4956	24.5786	44.4554	33.8092	28.9326	29.3862	20.8189	33.8051
B3GAT3	53.8416	107.583	54.409	65.2671	62.213	76.5307	43.8727	86.8781	34.7786	88.4755	80.828	58.9348	97.8743	69.3738	62.7628	94.7216	34.9529	75.1904	61.3372	19.9884	58.9659	80.202	46.8884	78.707	47.3372	69.0744	34.3442	45.1932	70.8079	73.058	89.5887	64.5045	37.6248	55.5139	73.7358	99.2373	69.4382	106.667	54.7066	62.8145	59.4637	72.2022	53.4746	84.5169	54.1377	42.2138	67.6449	51.9473	62.0259
B3GLCT	15.1289	5.3005	6.7677	5.3524	12.1011	8.7341	8.9436	11.6375	13.3039	10.176	9.3555	17.8433	8.1207	10.8202	4.3765	4.9907	8.4238	12.9349	5.0186	3.1874	10.5771	9.0054	5.7692	10.2293	7.2475	5.394	10.5439	8.6775	4.6296	11.802	11.1168	8.4746	5.8877	14.0694	10.1099	10.1182	7.8348	9.1314	9.1354	11.6466	8.7678	11.167	5.6211	8.8299	8.59	11.237	7.0884	12.6563	9.2233
B3GNT2	59.249	18.6198	35.258	22.727	41.8427	46.304	39.1745	40.6861	74.0448	40.4187	45.5356	72.7037	33.7923	33.6251	30.4006	11.1892	57.5598	41.6678	34.318	40.2715	65.7498	25.8066	24.7105	47.9035	39.4239	24.6844	52.733	39.7189	24.5162	46.5228	42.4969	38.7533	40.2608	57.6944	46.8116	47.0842	43.4201	37.3976	42.6258	40.3543	41.8163	47.6767	29.9446	20.1014	44.2617	81.1533	60.6522	48.2879	37.5541
B3GNT3	78.2868	20.7398	25.8967	112.437	324.534	82.473	59.3998	156.186	108.634	157.178	92.8811	149.313	160.35	149.217	180.027	5.4395	147.392	24.0593	208.019	13.0739	121.965	56.6107	95.6084	63.1389	245.663	65.6841	195.84	109.812	296.116	127.508	274.126	146.101	195.048	214.751	142.32	237.896	223.959	219.616	147.565	105.173	92.4725	7.1246	93.6442	115.39	90.8271	136.269	254.096	120.922	133.969
B3GNT4	0.2273	1.45	0.5084	0.1507	2.1267	0.2232	0.1654	2.1832	0.3775	0.972	1.7675	0.6865	1.2575	0.1878	0.5959	0.6588	0.2402	0.2617	1.4485	0.0563	0.7541	0.2283	0.8393	0.0926	0.3065	0.224	3.3421	0.2947	0.1086	0.383	0.0964	0.2098	0.3235	0.137	0.1905	0.6155	0.2256	0.1724	0.3626	1.2605	0.0656	0.325	0.4009	0.8574	0.4782	0.576	0.2087	1.273	0.2505
B3GNT5	14.0489	2.9457	7.7179	3.4042	12.5674	3.8999	5.678	11.2882	54.0531	15.4476	15.3077	16.5035	5.5735	6.9007	20.6979	1.0581	12.9058	4.6693	6.1481	2.9581	23.6822	3.3057	3.7309	10.9924	4.9377	2.8535	19.6453	3.6922	9.2229	8.4611	7.2653	12.389	18.2206	17.2305	16.2347	11.66	8.9497	7.2988	6.2976	12.8447	7.6032	4.4084	7.7691	4.8866	10.3107	16.0342	16.4992	7.2275	10.1051
B3GNT6	0.6566	0.0235	0.0699	0.9358	2.6918	0.0352	2.3547	0.3192	2.4929	19.8964	75.5979	0	8.0896	3.7213	53.8011	0.0254	15.6107	0	46.6424	1.1705	4.8233	0.3044	20.058	2.7027	3.931	5.1706	40.0627	8.3584	501.641	0.9011	4.0112	20.9342	12.8789	22.3542	12.2918	150.907	61.7178	47.3911	10.0568	1.0629	0.4319	0.1174	0.0188	2.4089	3.2484	2.8125	1.6534	0.6371	61.0954
B3GNT7	30.7044	1.7121	9.4691	26.4457	79.0706	38.8161	27.4975	26.2237	78.3669	44.5395	85.4001	36.1197	39.7799	40.2644	51.204	4.3954	47.7756	14.3033	36.4944	20.307	37.3925	31.6758	111.424	41.2081	104.651	22.52	47.0926	49.8165	132.357	55.0317	25.8299	32.6777	119.281	38.4716	58.8073	69.812	68.3393	51.1183	93.437	74.8296	43.4325	11.1305	104.906	89.3751	39.4466	51.6289	141.743	39.1936	46.9325
B3GNT8	1.9138	32.1591	9.7818	4.9402	4.3049	3.3522	4.4472	3.3224	1.3536	6.2149	7.0364	4.4468	4.2764	3.6176	2.8319	28.8419	3.2083	9.5353	9.4463	1.1162	5.4955	5.7158	2.7405	7.7619	4.0196	4.5248	3.4792	1.575	14.2962	7.0444	4.1375	5.8896	7.4912	2.0341	4.9873	6.0845	11.6189	2.9784	7.4376	6.7027	5.0004	12.0076	5.4473	10.1265	41.2504	9.9112	9.4125	2.7656	6.8808
B3GNT9	17.3066	26.1167	29.4755	10.8288	18.4546	23.6254	15.4818	23.5303	20.5938	22.4191	22.0228	43.2831	16.8304	13.7207	10.9551	24.394	15.8874	39.3409	13.0501	6.0828	34.3908	19.0818	11.6592	30.1937	17.0369	19.9813	20.5255	6.3954	9.586	19.1281	13.211	29.6344	19.2564	15.0565	20.2905	20.8588	26.2785	31.8243	25.7923	22.2678	21.7585	41.5486	8.5234	16.6618	22.8616	29.6635	15.2406	18.3502	22.2704
B3GNTL1	3.2529	1.2711	2.303	3.8148	5.5414	3.0432	2.0443	4.4134	2.0544	3.3614	2.7568	2.0338	2.9997	2.5969	3.8848	5.7158	1.9769	3.7501	3.0681	1.0532	3.8135	2.9464	2.4267	5.0987	3.9677	3.3411	3.7496	1.8457	4.2465	3.7411	3.1739	3.0339	3.6186	3.1279	2.2791	4.2927	2.8418	5.1509	4.1119	3.3305	3.0575	3.9096	2.1112	2.4609	2.6978	2.6573	5.1785	1.9779	5.6009
B4GALNT2	0.0462	0.0069	0.0369	0	0.3687	0.0206	0.192	0.02	0	0.4937	0	0	0	0.5725	0	0	0.366	0.0102	0.04	0.0286	0.7794	0.0446	0.0489	0.0314	0.0187	0	0	0.0659	1.2687	0.0278	0.0735	0.7757	0.0438	1.3535	0.043	0.0073	0.0076	0	0.0102	0.1038	0.2664	0	0.011	0.015	0.2101	0.0293	0.0379	0.2186	0.3426
B4GALT1	151.607	34.2441	103.304	74.037	273.057	123.176	129.139	168.168	344.919	184.34	212.129	336.333	176.375	115.267	157.121	26.9251	98.2591	144.456	119.112	52.5957	145.575	132.688	177.338	262.393	96.1544	113.901	161.151	127.061	146.654	150.562	129.533	134.565	128.018	162.591	185.7	126.228	92.9309	89.4547	215.012	148.99	180.975	227.359	88.2461	151.248	97.9306	155.03	110.562	133.853	96.6405
B4GALT2	37.2459	19.998	24.9201	29.3882	38.3039	35.4029	31.8563	52.132	36.5334	32.64	52.392	53.3882	51.0029	33.3397	18.2328	17.0755	26.3472	55.9502	35.1536	11.8741	35.2398	34.1248	28.019	41.543	33.0896	49.1168	28.2873	26.3228	34.2722	31.613	42.2285	34.1826	35.4955	31.5626	31.6774	43.6164	50.6776	33.9151	36.1464	43.7271	40.2166	60.433	20.9176	78.7689	36.4035	34.2385	29.8049	27.4219	37.3347
B4GALT3	37.4643	33.6491	48.4835	23.0499	69.7023	33.3904	26.9534	42.0916	52.1271	33.1351	32.8205	37.1485	34.7116	29.4548	80.9452	37.9829	27.1724	30.106	34.1581	13.8278	56.1898	34.7486	34.7769	36.3814	50.3191	39.6091	62.6357	40.8907	39.2644	40.1794	43.5879	30.6783	80.9596	43.8641	31.6305	35.0573	38.1431	38.8523	47.1221	56.7266	34.2777	30.2385	50.0761	51.8983	32.9239	54.0385	41.1936	41.0183	39.056
B4GALT4	33.39	10.116	20.5915	18.5393	22.1768	19.9887	22.36	40.4882	24.837	45.1215	62.7742	39.8953	40.6481	18.0922	47.7936	13.1517	52.917	21.0472	66.8695	11.2408	51.2171	17.9937	25.5882	17.1552	48.0851	25.6664	34.5102	22.4707	26.9644	34.0756	26.6088	37.785	62.6073	22.7317	24.2123	32.7368	35.5681	58.7434	22.8721	27.872	28.8355	23.1319	26.6549	33.6185	19.2032	25.2973	46.9303	16.5967	46.1562
B4GALT5	143.566	32.8542	68.2589	52.9235	171.482	83.4019	79.5825	128.634	238.61	125.433	101.252	138.576	170.24	48.2971	84.0654	28.0866	135.466	76.112	157.226	36.1901	106.567	56.2364	31.753	88.3955	88.4127	65.7603	133.269	67.7241	82.0483	105.049	181.692	114.082	117.308	166.91	100.883	131.569	111.088	101.948	73.7937	90.4418	106.152	92.0438	53.775	239.494	104.641	187.101	169.203	83.6997	91.8979
B4GALT6	8.8781	6.3359	13.8745	1.3894	1.1439	3.9697	3.567	4.3326	5.5674	3.5071	2.3377	6.7284	2.0138	2.3942	7.0457	5.9913	6.6562	4.4385	5.0112	2.462	5.6109	1.9585	2.1365	3.7347	4.2064	3.4086	2.0025	2.6701	9.3345	7.1119	1.2132	2.3601	1.3506	4.5847	3.4684	3.6839	3.4455	2.4654	4.0786	3.5948	2.5085	5.5306	2.8812	1.3444	4.4239	3.0969	4.3472	4.1531	4.4636
B4GALT7	18.3527	64.2519	22.2914	22.4114	24.6658	18.9195	15.6853	36.2909	15.4333	29.5584	23.7332	28.6149	19.4145	23.5391	19.8003	50.5786	19.3503	28.8362	19.7906	6.905	21.634	25.0067	18.2448	26.5061	22.2942	27.5709	28.3162	14.9401	35.669	25.6841	30.2909	23.7685	35.2092	23.585	19.2587	30.1607	26.3048	30.3037	25.8853	25.0187	24.5086	24.9607	21.7967	20.0726	19.3931	23.5894	21.4319	18.5387	28.8977
B4GAT1	47.4584	112.49	103.178	28.1038	18.72	39.4475	36.2744	32.3944	20.06	33.8135	32.099	43.9749	15.3064	26.8103	31.9654	116.821	47.1983	42.2343	31.3531	26.6736	44.9729	38.7534	23.5294	31.7913	42.0922	45.2711	29.077	32.6218	34.7266	59.881	32.4737	35.1109	22.6963	25.4156	29.8613	38.9576	28.8281	49.7537	39.4755	39.7143	39.0477	48.257	41.4771	23.9069	43.2361	38.9121	39.8535	41.2761	51.9229
BCAN	0.6079	0.8932	1.3106	0.5037	1.7253	1.0469	0.3498	0.6156	1.6143	1.543	1.325	0.7949	0.6273	0.846	3.6382	0.2378	0.7765	0.3846	1.0529	0.2777	3.3662	0.5536	1.2487	0.3097	0.3396	0.3604	2.044	0.8109	1.7013	1.0716	1.0439	1.0691	2.6886	1.7308	0.6471	0.7794	0.9484	1.7753	1.4241	1.855	1.3403	0.3623	1.2109	0.4519	1.0741	1.7059	1.8082	1.0106	6.2038
BET1	19.3603	13.7391	13.9755	6.7347	23.2226	13.0011	12.2938	11.4505	16.572	10.6954	11.4646	16.6316	11.692	9.3641	10.6822	12.62	15.5784	11.6731	10.1545	6.9523	17.6298	8.3534	10.2473	10.8541	11.3002	14.4608	13.5844	13.2629	26.619	12.9432	10.7964	9.7242	20.4055	19.1503	10.0322	10.4867	13.5662	14.1027	10.3694	15.0222	10.7218	14.178	13.0906	8.0205	16.2558	16.3593	10.3497	14.3655	11.2073
BET1L	52.3524	38.3377	39.3189	39.7135	43.8589	40.1245	41.9528	44.2193	60.5897	49.9601	54.8194	57.9493	57.1567	43.1071	45.8554	42.9717	42.697	48.2824	46.4146	24.3583	48.5066	42.6547	31.2182	52.0485	53.1875	55.8597	35.377	45.0913	56.2541	52.16	67.1153	48.9749	55.1388	59.3257	47.2548	49.1033	47.5119	53.3453	47.6746	51.0356	53.9002	48.1499	41.0282	52.5589	43.4992	45.4991	58.1429	52.8569	38.4617
BGLAP	0.1431	3.3274	0.6859	0.6521	3.9851	0.7667	1.004	0.9936	0.0849	0.3375	0.1739	0.0982	1.6494	0.5069	1.9574	3.2493	1.0031	1.9012	1.1152	0.0886	0.921	0.8292	0.8446	3.9363	1.0419	0.6124	0.668	0.2227	0.4102	2.8422	0.7588	0.7706	1.273	0.1438	0.1	0.7435	1.0654	2.9854	0.8561	2.0912	0.3715	1.279	0.7162	0.9075	0.8544	0.1813	2.3224	0.0847	1.8199
BGN	1885.03	884.089	1639.59	1089.98	958.201	2103.72	2282.1	2038.44	2165.77	1607.27	1414.65	3228.72	889.403	947.598	1518.24	526.318	183.203	3773.13	787.349	480.853	2390.41	2034.98	1290.96	3446.27	867.129	1993.29	1188.01	1396.64	128.057	2453.4	1374.02	2717.71	434.787	1686.98	2021.45	2507.69	1168.28	2050.75	3089.33	3277.85	1754.16	4938.37	386.729	2312.83	1688.05	1365.18	915.644	1339.91	1813.11
C1GALT1	24.4633	15.4033	25.0103	10.1605	34.9122	19.9786	19.0366	16.9519	22.6235	31.767	32.7926	30.0063	12.4701	9.649	37.3988	42.0812	37.5336	11.1761	17.0668	7.5901	43.4634	7.7951	22.7623	11.8337	43.5448	13.0906	26.7378	31.676	27.9932	21.7581	23.5169	20.4046	32.7932	37.5106	23.2546	15.4656	20.8681	31.8526	49.5475	66.9322	18.9511	10.0886	23.7346	7.0212	20.2005	29.5174	40.2707	23.1421	30.5823
C1GALT1C1	62.9438	48.0718	53.6202	31.7028	99.6953	66.1695	47.4639	49.834	71.0581	84.6432	81.9876	47.9247	53.5766	35.6391	42.0717	40.4003	83.485	33.9078	38.4905	25.5718	93.2657	41.3829	34.2251	42.9859	41.9723	46.6029	61.8836	74.5025	74.2543	46.427	68.0502	55.7338	69.6646	85.7508	52.9728	53.6605	70.9705	71.8713	38.1907	54.6352	55.0981	42.3501	51.1703	32.9402	48.6458	71.1618	76.7727	59.6102	60.4518
C1GALT1C1L	3.0198	1.2057	1.7233	1.4745	0.6608	1.9502	1.4293	1.5447	2.4952	1.3736	2.0095	3.4799	0.8454	3.1995	0.1844	6.2008	1.7752	1.8628	1.4009	1.769	3.2393	1.8125	0.6366	1.4285	2.2686	3.4827	2.0139	1.7203	1.7778	0.8764	2.7452	2.4063	0.5373	3.3596	2.1094	1.2736	1.3919	1.1592	1.9358	4.3648	1.4	2.7957	1.3881	3.5252	1.8859	5.7746	2.8113	1.7868	3.5663
CA4	8.4146	5.4848	1.1242	1.7726	1.3663	0.3821	9.8954	1.1389	0.0677	24.7024	4.7139	0.1567	2.0254	8.0576	5.3162	19.7897	12.9195	6.2153	3.5864	11.37	1.0281	1.9835	5.3358	0.7556	0.4846	0.6215	1.731	3.5289	0.0409	6.7472	0.3025	0.9656	4.1412	1.9777	9.8027	2.1288	1.5291	0.2885	1.7445	0.0641	15.3784	1.0198	13.2976	0.1113	0.7786	1.3555	5.5553	1.097	9.1418
CAD	35.617	10.9956	20.8022	10.8094	31.168	21.7086	21.2769	23.7398	11.2331	12.9777	13.9238	23.8565	23.0967	19.4883	3.939	14.319	17.2303	18.6031	30.4571	5.8148	27.3679	20.2231	14.8806	21.6228	24.076	19.7241	37.9918	12.9413	18.1842	26.3447	33.3207	13.7135	8.0462	27.7536	22.288	19.7793	21.7586	16.0001	23.7093	24.6116	21.901	24.1254	13.4109	19.99	20.3464	24.5248	17.3402	23.5677	24.3425
CALR	1195.33	524.594	545.106	649.55	1043.58	726.018	657.15	1269.71	1435.22	948.921	942.754	1179.67	986.893	1003.78	976.518	671.344	748.069	832.466	854.169	202.536	1051	795.563	594.299	1177.29	637.386	1046.81	642.877	800.791	710.379	706.996	841.363	792.406	813.113	954.246	751.794	1023.95	982.36	752.791	1010.84	1095.61	658.358	879.884	552.41	1003.82	842.637	810.415	1147.92	939.768	793.859
CANX	457.972	191.95	324.622	145.256	381.366	251.415	250.928	315.484	738.718	375.1	340.597	509.833	194.349	321.69	373.95	227.867	328.09	190.327	262.561	153.707	450.678	185.632	174.178	322.589	166.697	193.407	266.851	259.117	334.241	310.32	252.329	225.153	344.227	665.211	300.952	284.783	280.543	255.96	252.101	380.082	273.738	260.808	194.687	109.583	252.452	450.689	266.157	630.186	287.081
CAPZA1	179.68	36.5873	105.729	94.3788	117.392	152.172	110.891	161.478	202.315	160.44	169.924	171.755	174.047	88.0583	101.195	37.0889	146.886	135.161	141.739	48.6757	206.469	115.982	109.402	149.768	109.298	122.245	129.756	127.124	94.2776	134.66	185.392	128.839	155.908	175.337	127.974	156.339	168.993	136.717	89.9929	173.263	129.689	145.631	88.2317	143.89	121.297	160.418	171.226	147.167	142.357
CAPZA2	73.6527	32.044	60.0993	21.8195	37.241	56.3034	38.7972	55.0522	81.5463	44.2585	52.1281	68.3634	38.4594	25.2757	61.4883	35.9033	65.1675	36.8717	40.1941	23.391	84.2046	33.2718	22.9775	50.3512	52.0911	51.0573	56.9358	55.5446	59.9445	51.5246	40.1754	30.4377	55.4794	74.383	48.9479	52.7607	44.84	48.8578	32.8418	47.5888	42.6182	60.4931	33.869	31.3313	55.3434	77.122	65.5965	46.0217	45.7145
CAPZA3	0.1934	0	0.0343	2.8841	0.2154	0	0.603	0.2238	0.153	0	2.1932	0.2655	0.2378	0.3996	0	0	0.4322	2.5693	0.2009	0.3591	1.6041	0.1494	0.2927	0.0657	0.2607	0.7022	0	0.3511	0	0.1164	0.8887	0	2.202	0	0.6303	0.6089	0	1.6301	0.0857	0	0.8925	0.0576	1.5209	0.2516	0.11	0.4493	0.5072	0.0381	8.3619
CAPZB	54.9919	24.3812	39.5311	44.975	45.6673	50.1051	34.1214	55.9384	62.2831	56.1923	53.1379	72.9247	38.1635	31.018	33.7105	28.8307	39.6446	75.574	45.1095	14.3315	56.5679	55.6883	34.0837	67.5613	48.5921	66.9228	31.6467	45.6638	42.2746	49.6164	56.6327	53.2548	24.314	62.0973	52.2034	80.4238	57.8206	56.6131	55.2284	64.8011	51.2374	77.1381	37.2384	44.1818	60.2847	49.578	60.4305	42.4926	44.8514
CASQ1	0.6395	0.2288	0.4258	0.8743	1.1755	0.8566	1.1965	0.3608	0.3414	0.2413	0.2331	0.2634	0.4128	0.2265	0.164	0.6179	2.456	1.0196	0.1994	0.2771	1.0976	1.3341	0.0871	1.466	7.6571	0.4479	0.112	0.2488	0	1.2702	0.373	0.7872	0.0455	0.2249	0.5807	0.1812	0.2222	0.3639	0.17	0.8627	0.5258	0.5716	0.3201	0.3432	1.5819	0.3242	0.3145	0.1324	0.488
CCDC115	38.1205	19.7141	32.7394	31.6498	50.1315	44.2143	29.052	27.1963	29.2671	35.5811	60.6559	45.5996	28.5352	26.1913	34.3435	19.4834	29.1946	31.4538	36.6579	15.8839	53.935	38.7079	18.7469	31.8747	38.0662	33.5905	33.6113	36.9495	32.2408	35.7071	55.4375	31.7541	11.3096	49.8097	32.4432	41.4126	46.0946	43.4676	62.0409	39.9902	33.3386	28.1589	30.8111	27.9789	30.1042	52.3841	42.6	39.1081	34.7909
CCDC47	117.175	67.6493	93.6784	44.7177	88.3909	58.582	59.2393	66.4807	134.285	63.4968	56.5541	117.795	50.4992	53.2489	90.6831	84.5393	98.5649	42.8299	77.2	36.9448	89.9771	45.2556	47.685	57.8912	80.8143	61.9383	85.1149	74.4958	68.7978	94.3918	79.4984	66.3836	145.645	96.2706	86.4831	62.5528	53.6257	82.0826	39.215	98.9763	88.7351	59.3276	49.4514	37.465	66.9781	64.2491	77.5183	84.1007	77.383
CD55	46.1886	26.5742	67.9852	58.3295	359.652	81.7335	50.3847	68.1102	239.6	258.114	698.414	242.801	75.5224	38.0453	242.813	64.4211	51.4303	156.525	105.76	26.5999	249.364	42.9421	1181.25	148.2	118.242	107.652	329.012	133.772	354.019	79.7429	180.428	334.448	316.018	548.254	113.825	85.1613	198.925	455.003	190.379	220.421	111.965	71.521	94.9357	62.6736	110.675	192.323	234.428	222.07	289.522
CD59	210.807	76.8182	90.5185	110.24	225.068	176.879	126.402	298.507	249.443	235.043	235.589	312.302	196.242	172.937	198.507	157.931	138.449	130.065	95.8713	52.8161	198.418	153.414	78.7436	106.806	93.2565	168.064	106.966	185.392	21.3508	172.424	151.735	135.334	106.977	122.337	219.475	186.891	142.306	184.78	115.976	114.06	153.698	129.046	136.165	175.137	78.6189	154.087	153.607	131.544	109.155
CDKAL1	14.9123	6.005	9.7387	8.4318	16.0443	9.3145	10.7841	9.1713	9.513	9.3173	7.0298	13.0872	4.1185	7.472	20.7571	8.0809	9.593	11.4297	10.3252	5.2969	13.6843	9.0845	5.3621	10.7497	7.4204	8.7697	13.9577	9.609	16.4122	12.4215	8.5355	11.0923	11.2741	16.7919	12.667	12.3036	6.4275	8.9067	10.8994	13.5797	10.4407	10.141	9.7624	10.3677	9.0764	13.5894	9.2432	13.1328	11.5509
CFP	0.5034	0.1208	0.4578	0.4985	0.1641	0.8881	0.5361	0.1492	0.1603	0.2664	0.1691	0.1012	0.3397	0.0435	0.042	0.3915	0.3967	0.6036	0.1148	0.0912	0.4004	0.6973	0.1561	0.563	0.2086	0.4013	0.1576	0.2389	0.0352	0.3991	0.1693	0.1323	0.0874	0.1974	0.4117	0.3132	0.0975	1.0403	0.3102	0.0552	0.2338	0.7134	0.1668	0.3474	0.2199	0.1945	0.3744	0.0727	0.4841
CGA	0.1391	0.2487	0.0555	0.3456	0	0.0931	0.0542	0.0302	0.2887	0.0328	0.2535	0	0	0.1231	0.2378	0.2687	0.0424	0.1848	0	0.2367	0.3878	0.2015	0.1578	1.3459	0.0562	0.0271	0.2029	0	0	0.0628	0.0737	0.0535	0	0.1397	14.3752	0.1314	0.0345	0.044	0.0462	0.2345	0.2708	0.0311	0	0.0678	0	0.1101	0.3419	0.3085	0.0884
CHP1	156.29	35.945	70.6512	120.549	91.9187	134.91	109.867	126.787	119.48	162.59	294.134	121.4	127.688	97.9821	261.14	50.723	170.012	81.3056	87.9388	39.2185	107.938	87.3284	88.7492	100.162	129.551	68.3387	132.986	149.113	91.4211	190.486	184.232	138.243	230.405	250.306	142.027	186.159	210.27	190.02	147.27	205.085	129.369	74.5202	146.959	88.4363	126.425	155.246	208.666	191.274	196.416
CHST10	13.2454	13.7793	15.1303	5.373	3.2448	9.117	7.9237	5.509	6.3114	5.5824	6.7685	11.6398	2.9264	10.684	3.4863	15.006	6.0091	10.1638	3.6161	3.4445	8.9327	9.4701	5.457	9.3402	6.7593	12.0242	6.5303	8.9105	0.4175	9.1626	9.9666	8.9755	2.0948	7.6716	7.6029	5.373	2.4351	7.4242	5.9311	8.3412	9.8969	14.2922	7.3551	10.246	8.1727	7.2465	4.8405	6.7939	9.8656
CHST14	57.4918	35.3943	45.0286	30.3209	26.8119	55.4716	40.8641	51.004	70.2421	37.2446	43.4918	73.7984	38.2492	41.8408	22.2307	60.4867	24.1444	88.9828	25.076	14.7601	53.7719	52.5558	29.8323	66.5222	41.7655	48.3625	38.4887	45.7699	20.772	50.9612	66.0517	58.845	19.07	48.3708	48.11	67.5532	36.9586	55.2131	58.7713	73.3647	53.43	82.0296	22.311	55.847	51.4192	55.638	45.9767	58.7267	59.3257
CHST3	38.1957	9.154	12.8792	9.6509	27.2471	22.6225	19.5254	45.0514	19.8379	22.9429	20.9668	54.4228	27.7837	24.117	5.5955	5.392	7.8766	22.4533	10.5633	9.1365	35.6882	18.0877	10.035	18.8393	16.9713	16.4315	13.1872	14.2406	2.6519	24.8936	23.5457	15.7414	2.9307	19.7603	31.2932	22.9937	12.768	38.7503	11.3069	16.6164	18.9889	35.8394	8.1007	11.1899	19.7431	23.4081	22.4249	23.3645	18.5202
CHST4	105.209	0.0241	31.0343	43.7652	32.9196	24.522	59.4439	17.8103	22.4249	70.611	24.4203	27.6909	20.5378	19.1968	17.4269	14.6423	62.7549	10.2098	20.565	40.1871	33.1337	47.5618	26.9082	34.4208	29.5571	16.4275	10.2898	32.0776	0.2319	227.707	5.7763	23.4199	64.6671	98.5402	128.822	112.687	32.8704	32.3203	14.7334	40.0106	81.5036	13.6169	59.0513	2.1572	7.5665	14.8637	32.542	23.0046	51.8148
CHST6	0.7441	0.1574	0.1151	0.3381	2.7899	0.8145	0.7049	5.0005	1.6993	4.144	5.1142	1.4831	10.3077	0.5456	0.6293	1.3221	1.2633	3.5719	2.6439	0.104	1.2085	0.6028	2.543	1.0598	2.5828	3.6359	3.5858	0.4358	1.7662	0.4912	2.6136	2.5177	0.1936	2.0583	1.0731	3.1822	4.6309	0.2125	2.4042	1.8529	0.9278	1.9811	0.4348	3.5989	3.7127	1.5413	1.5505	3.2145	0.9159
CHST8	1.6486	10.3616	1.4795	0.5988	0.1006	2.057	0.8803	0.6469	0.0804	2.1944	1.6649	0.6822	0.2083	0.64	0.7337	0.2837	0.1101	0.6001	0.4928	0.4753	3.0815	7.7214	0.2051	0.6212	0.2923	3.6903	1.6868	0.369	0.0324	1.672	0.479	1.8244	0.4822	0.0454	2.0823	0.576	0.1345	0.6853	1.0209	0.3047	0.8208	1.0497	4.8444	1.4323	0.4238	0.3721	1.3551	0.2672	1.7808
CHSY1	63.9325	17.2852	35.2317	18.2524	44.6597	70.5538	35.6655	57.6486	79.0142	30.5753	26.7785	89.9179	29.5734	25.7368	33.5668	14.0418	23.4893	68.9502	16.2132	25.4696	56.3882	32.8237	22.0926	80.4503	20.8937	30.2856	38.606	25.5591	10.275	35.316	23.5953	46.1246	19.8265	82.4162	44.3764	32.2506	25.4335	36.2876	37.7182	52.265	39.2119	68.7101	18.0484	21.9804	24.5309	46.6485	39.3142	40.9741	38.5731
CKAP4	159.352	88.0346	89.6145	67.3577	93.6619	129.123	113.301	247.878	263.146	88.3519	113.531	192.339	90.3898	88.7157	143.924	74.5355	121.73	238.142	136.496	48.7458	134.148	104.51	111.748	192.926	125.326	208.814	148.976	89.7354	370.658	121.55	78.7348	116.099	95.3861	130.067	120.428	183.491	106.199	111.261	156.808	157.228	133.164	223.005	63.8841	260.497	139.967	135.709	91.3445	94.4628	116.503
CMAS	74.9109	59.6224	76.5046	49.794	157.168	69.6374	48.2937	67.358	106.951	45.9812	48.6562	78.0987	66.0512	61.1382	47.0769	80.5893	74.5049	46.7934	73.0126	28.3954	92.5288	44.0986	42.42	50.7624	61.3105	52.0907	82.2058	57.0095	101.514	64.2258	57.4734	48.0363	79.0491	217.081	60.428	85.8193	40.2709	52.176	56.0224	87.4338	52.9743	57.0276	60.033	79.6356	70.8707	95.2868	68.3921	68.9858	62.0782
CNIH1	79.2226	55.2816	53.7311	21.2922	65.5809	50.4888	49.3013	71.3538	135.144	37.9583	39.9767	103.206	25.1546	45.0254	51.1764	36.6757	52.1644	50.0088	64.9722	22.8975	94.9071	32.8569	31.4713	51.5369	65.3373	49.7218	75.4894	52.2648	51.0944	50.6448	49.3191	36.274	37.7702	109.586	47.1686	55.8615	69.3851	38.4879	41.8937	50.0529	49.305	62.8167	32.5626	28.6529	51.1411	76.669	57.434	64.6724	48.9712
CNIH2	3.651	109.21	27.0302	2.8326	2.4033	5.7794	3.1826	1.6134	1.8114	10.0824	5.4583	5.8787	3.3056	1.5578	3.1214	90.828	0.6879	3.3515	1.4831	1.2326	4.2724	9.54	1.7783	1.657	2.0676	19.7573	3.7961	1.0588	0.1903	5.6936	1.1968	6.4094	2.0315	0.8672	7.1871	3.1355	1.0215	3.4834	2.3829	2.0149	2.0393	9.9981	14.002	6.3473	2.18	1.5563	4.7013	1.7871	6.9651
CNIH3	3.7264	9.01	2.3713	2.6657	8.5074	2.1764	1.9677	4.4945	2.3391	3.3826	3.2206	9.5634	3.0767	1.8514	2.5005	9.2217	0.6934	12.9533	0.9568	0.59	9.1193	2.5863	2.1247	2.7591	5.7227	1.9387	3.287	2.6129	0.3261	1.7213	3.4236	4.0754	1.8734	3.2873	1.9219	4.3902	1.9465	4.9858	3.8886	7.0144	3.5529	2.1108	2.1455	2.6318	8.2328	3.583	3.5269	2.9483	3.4856
COG1	19.0815	27.2402	23.5807	13.0696	28.7996	12.7705	15.5127	18.9498	27.1792	16.9487	18.2849	22.5834	17.1776	16.3	22.291	35.1466	16.3292	13.7016	19.208	8.6633	19.0352	12.8993	12.1445	14.1148	18.2497	18.0675	21.8302	14.1709	21.5123	22.2284	13.1796	22.5246	23.8827	18.9004	19.1727	19.3252	11.2552	22.2905	11.7964	21.6989	19.9592	16.4879	17.8545	11.9857	18.1349	15.3457	16.6256	20.1011	24.4496
COG2	10.3967	3.8828	9.3433	4.9598	9.0197	6.7096	6.0469	4.1348	6.5039	6.2296	6.2377	7.9159	3.9977	5.139	5.2254	9.346	12.2531	4.3031	4.7862	2.89	11.0361	5.0754	6.7517	4.9496	11.1791	5.153	6.0741	7.1531	10.7566	12.5382	6.4821	7.3637	8.453	10.6498	7.3854	7.2681	6.6369	6.5252	10.589	9.166	7.8521	5.2605	5.2803	2.2378	6.0894	9.1869	7.7164	7.7285	12.285
COG3	29.7436	11.7147	27.3571	12.9654	37.0089	17.6507	16.2092	10.2385	17.8259	19.8714	19.0561	24.7516	16.8123	13.616	25.3028	20.9342	27.3253	16.0482	17.0372	11.1302	20.8862	11.6877	17.2448	14.1417	21.6887	11.982	25.826	16.3897	32.4661	24.552	17.7612	20.0327	23.2082	23.7624	17.5864	16.5701	15.7257	20.2015	18.3638	32.4307	17.7972	17.3697	19.7521	13.4435	20.422	16.5276	23.0042	17.3505	23.2157
COG4	49.2506	28.5265	35.7905	37.4607	79.9984	38.085	36.2019	53.8941	53.9485	55.485	44.83	66.6702	51.3502	48.4037	31.302	36.3408	45.2811	37.318	58.1029	14.7689	62.505	44.0059	41.0289	41.0802	37.6386	57.2034	48.37	39.5336	44.9533	53.2962	35.9696	41.7201	39.4964	44.3146	51.6328	58.6968	36.62	59.7576	45.5902	69.0214	42.0841	34.674	39.0212	54.2609	37.1736	42.1121	75.4054	28.7563	49.4275
COG5	21.709	7.4562	16.7644	6.969	13.2126	12.63	11.3595	9.8673	14.8418	12.9093	11.7044	18.1567	7.6956	5.848	10.8564	8.9448	15.1065	9.9746	12.2991	9.1258	22.5203	7.9679	6.9813	11.0798	14.0344	10.552	13.3245	9.1775	22.9814	15.7807	15.2359	10.4774	17.7531	27.7818	13.6778	20.2834	18.1024	9.7627	16.1185	14.8109	11.8634	14.001	8.8388	7.5333	14.0403	21.6614	16.6757	18.1177	14.5936
COG6	17.3906	8.6238	15.4028	5.1771	14.5225	10.206	9.702	8.6003	12.3858	8.5062	8.2349	21.9473	5.2482	7.7721	9.8191	10.4271	17.9789	9.6226	7.6594	9.5333	15.6518	5.4337	7.6586	8.4181	10.4705	7.5096	12.5536	7.8694	9.9143	11.3134	11.9898	8.9482	8.4727	13.2032	9.0402	9.0929	12.8569	9.7105	8.877	14.4337	9.7982	12.595	6.9619	4.7417	9.7454	12.7138	11.3562	15.1428	10.4647
COG7	18.4155	18.1993	24.0487	15.1403	21.5738	15.2201	15.0853	18.6809	14.1585	22.0674	22.5961	20.2363	16.6898	14.1885	23.8464	19.0044	24.3844	16.2555	17.6538	6.739	26.4792	16.6044	19.9031	13.66	26.0017	16.9191	20.6042	16.9185	28.872	24.0094	27.0103	22.0933	24.9375	25.0024	19.8152	23.7151	21.0983	24.7283	27.7076	30.0379	17.7744	16.0357	19.1279	10.3447	17.5734	25.6271	22.931	17.1598	25.4165
COG8	3.8303	2.6556	2.7466	2.2274	3.3371	3.3183	3.6914	1.9521	1.5634	2.0719	2.7044	3.124	2.3007	2.3494	1.397	4.2444	2.7098	2.8246	2.8938	1.0712	3.4	3.4109	2.0502	2.3271	3.5962	3.2743	2.4709	2.6932	4.8102	3.8864	2.9535	2.0614	1.6005	2.2069	2.7614	3.0126	1.4041	2.3216	3.4806	3.4171	2.8813	3.3216	2.6131	2.4943	3.402	2.4827	2.0825	1.8972	3.5641
COL7A1	28.5952	3.5771	2.4986	18.7428	139.737	8.3195	10.9567	22.052	17.4215	30.4906	12.6374	51.5269	88.9837	86.6136	6.5831	8.9515	18.3659	76.9202	64.6584	1.3188	105.998	44.2751	8.7007	24.8112	39.4435	13.1515	26.3851	4.0718	5.6792	9.7868	34.1987	15.927	7.5373	11.2369	61.9145	20.5045	20.9476	86.9897	27.8218	18.7273	44.974	8.5311	3.5279	50.5061	45.3171	20.8901	48.8395	9.6354	29.6646
COPA	157.213	49.8742	130.252	64.3724	135.167	86.0852	83.7232	98.7401	226.427	86.1311	107.874	160.78	82.1422	75.2809	171.053	50.1403	136.531	92.8171	86.184	43.168	228.496	64.6831	131.298	103.879	127.085	85.0597	130.33	81.2173	107.977	123.86	81.2163	94.6548	194.918	145.012	96.7916	105.083	86.23	102.921	111.247	150.553	112.612	106.869	103.57	64.5463	112.725	126.441	100.069	126.497	113.847
COPB1	119.556	29.6324	88.337	51.094	98.5048	80.2225	74.0821	76.6599	174.238	85.8824	96.2285	141.395	60.446	71.9067	81.4277	38.4997	123.001	67.9998	85.4605	41.2334	125.015	58.8311	68.1467	75.5492	77.1635	98.9238	60.4409	68.3609	93.5272	87.4809	92.4895	82.1134	95.6485	119.239	86.3548	90.3221	84.5747	84.9693	73.963	101.11	89.3897	88.7863	54.8294	62.7803	81.0102	276.901	95.2692	90.1981	79.201
COPB2	45.0425	15.1205	33.804	16.0718	35.0283	23.9232	24.6512	37.7059	72.7732	28.1242	31.1498	50.0775	41.1389	21.8356	27.5221	19.2913	47.3451	24.259	23.0424	15.8804	58.694	20.0769	27.6704	24.2854	25.7637	29.57	27.754	23.1506	40.0224	30.6477	27.429	31.3741	36.4897	35.0546	28.9146	28.5149	30.0752	30.1353	24.3781	30.6647	29.3381	28.9561	21.3847	27.8511	29.7908	32.4928	25.2075	40.1393	29.8235
COPE	40.3031	143.602	108.533	90.6008	97.9982	78.629	54.5728	87.4163	44.487	85.638	59.7414	51.087	112.516	102.417	85.854	117.575	78.4008	100.912	90.5152	23.1345	51.3436	111.188	74.3943	107.275	92.2083	71.6811	102.443	55.6628	92.5673	79.1858	88.1591	79.8806	79.9198	54.5287	70.9493	74.1539	80.3314	109.688	74.2836	87.2714	67.5759	76.0812	73.3643	182.293	83.1198	62.7038	82.3545	55.6982	74.7206
COPG1	193.259	106.223	151.293	112.28	230.098	114.971	120.296	217.645	340.45	201.05	211.917	280.731	295.849	132.339	191.648	125.143	210.433	152.832	167.811	59.5254	259.568	119.191	185.84	164.71	159.527	168.898	203.57	131.417	207.193	173.343	182.2	169.238	188.788	190.392	157.845	171.969	185.359	178.343	175.605	187.697	161.053	137.287	134.294	198.067	170.868	154.219	183.044	201.774	164.791
COPG2	35.7603	10.7751	20.742	11.1423	23.3152	10.6689	15.1991	17.2412	14.7488	22.7314	19.8441	31.1844	13.5073	13.8267	16.4403	13.751	25.7815	17.2913	28.4495	8.7361	29.5579	17.1113	7.4449	16.8247	21.8799	18.866	23.1231	22.9754	25.3181	21.3936	30.3796	17.4612	10.9936	40.7396	22.9068	14.6874	16.4271	16.3506	24.0157	23.641	17.4489	18.6781	13.8927	12.9582	16.3457	28.5086	19.3905	27.9813	16.8697
COPZ1	164.147	143.546	134.569	117.608	117.22	124.495	101.04	151.987	269.086	118.764	127.917	125.769	132.165	96.0018	165.037	160.698	155.365	99.348	125.449	56.6322	112.711	111.538	87.2619	99.8165	116.45	144.288	161.234	149.28	251.867	117.224	129.088	114.961	183.787	163.984	120.775	131.199	83.8761	156.835	123.621	201.815	92.7458	103.419	144.366	161.625	120.03	177.613	134.205	142.997	135.38
COPZ2	56.9954	21.7186	28.7231	24.6842	15.6053	56.5381	33.2524	40.7776	54.4217	20.259	34.225	72.8243	24.3366	22.519	20.54	5.2859	18.6565	134.509	21.2012	17.5246	40.1242	61.2588	21.3803	71.588	42.1928	125.425	24.0703	35.058	7.3642	27.5643	28.3027	60.0584	19.7026	33.1302	27.0573	34.3242	22.9338	34.8654	40.8859	65.9842	39.9192	167.108	13.3199	64.1212	45.2105	32.9761	19.5601	21.3665	37.6069
CRPPA	1.8218	0.789	1.3738	0.6435	2.5956	2.132	1.4502	1.7312	2.025	1.0764	1.2895	2.9885	1.1495	0.968	0.623	1.2045	1.6016	0.981	1.3053	0.8368	2.5508	0.8668	0.4615	1.0746	1.0938	1.1639	1.0631	1.5966	1.3332	1.5583	0.9559	1.3426	0.6619	2.0234	1.661	0.8334	1.247	2.0126	1.1473	1.5091	1.1866	1.5685	0.9598	0.6268	1.6358	1.124	1.3299	0.5957	1.4634
CSNK1D	41.8807	44.1429	38.6817	30.3413	67.1866	42.0176	31.5861	35.7334	37.9013	31.1872	45.2658	40.7341	44.0036	33.1975	37.9982	76.1613	37.0753	37.9799	34.8335	15.885	40.0469	42.1797	29.2871	45.3083	42.2639	31.5316	51.6079	33.614	41.3591	51.549	46.9649	39.2389	44.7087	31.9371	44.7066	49.0034	20.3848	46.2632	29.5374	25.1372	36.7953	44.8504	26.1832	43.3961	38.5034	34.5094	45.2938	37.873	51.8798
CSPG4	11.0653	15.9458	9.514	7.2796	48.8985	18.6658	5.4936	20.5454	7.0084	3.8066	9.3078	62.4726	7.5725	24.681	4.097	14.4225	15.2406	24.5729	29.6533	4.4699	19.2341	15.8523	12.6394	14.9271	37.0801	7.652	10.6224	9.4772	4.2811	13.9262	19.3502	10.2093	3.9493	6.1698	10.1816	11.3572	8.7716	7.5428	13.7492	14.8524	9.3814	13.8322	4.0214	16.8602	17.9046	8.9619	3.6581	6.4585	12.0097
CSPG5	0.7423	4.6896	0.3449	0.2225	1.9353	0.825	0.6895	0.3016	0.5247	0.7748	2.367	0.4771	1.5147	0.1399	0.216	0.2442	0.4525	0.6715	1.198	0.1857	2.2634	1.2813	0.4303	0.4023	1.2777	0.6145	4.6265	0.7496	0.2037	0.3993	1.1893	0.9842	0.2698	1.5553	0.5957	0.5371	0.2979	0.6191	1.2599	2.0951	0.615	0.7482	0.7453	0.2157	0.7814	1.9815	0.9787	0.9438	1.5065
CTSA	67.3011	40.3402	36.2779	65.718	80.8421	47.9174	37.6342	77.3318	83.2534	56.3782	79.0431	98.8486	53.5627	42.584	86.1614	41.211	36.1937	72.0883	65.7137	16.1068	63.0482	45.2296	21.613	120.536	46.1709	68.1694	109.368	46.9542	51.0451	51.1012	84.1786	54.7158	49.0856	70.5604	51.4381	78.9722	75.9877	61.5946	67.4157	55.4451	65.7341	66.8742	32.564	74.1999	63.7261	94.9613	58.8396	86.0537	63.3245
CTSC	46.6164	5.3992	77.7082	20.9878	22.1973	29.4965	31.3839	31.9272	48.7937	32.817	27.2905	27.3241	14.9709	16.8735	26.2734	8.5288	27.1619	19.1653	13.8441	11.8095	37.9076	23.0843	11.0068	61.3678	14.4408	32.1543	29.0694	24.2639	5.8722	30.0562	15.5839	21.0168	24.9882	44.4496	44.2621	21.1892	24.0278	48.931	24.7909	26.6721	28.4851	30.3771	12.0208	40.4625	17.8677	39.1686	20.5091	46.8323	31.5516
CTSZ	642.089	364.438	307.717	510.301	570.327	388.998	349.693	940.103	1012.53	571.848	664.285	793.325	413.68	642.989	223.579	274.535	270.382	760.566	600.831	164.854	763.703	579.958	171.905	1163.32	376.51	672.405	489.768	632.834	134.73	423.497	758.878	515.892	156.162	766.466	413.022	947.941	448.493	646.209	533.509	462.484	487.798	742.661	307.854	775.585	630.939	773.12	718.397	581.835	492.251
CYBB	100.122	10.1375	43.0835	30.5134	10.7829	44.1532	64.51	44.5821	115.665	40.6903	17.5859	87.7706	18.899	21.1499	9.3536	8.3631	22.6321	45.9966	18.1508	24.98	124.706	75.131	8.5321	119.692	16.4653	48.7485	39.8142	73.8561	3.5929	44.5213	15.0643	37.1016	6.3278	136.933	55.4553	33.39	18.5146	80.672	65.0796	34.9841	50.1506	59.2824	11.227	29.2713	35.3521	73.6102	56.7703	123.414	52.3703
DAD1	624.637	427.011	370.446	417.528	565.088	469.678	427.676	922.943	993.25	559.857	401.176	763.674	488.928	563.171	603.139	310.546	590.616	512.975	623.928	214.911	770.678	563.966	449.196	511.927	454.747	712.135	909.646	685.17	663.96	454.465	670.346	379.46	492.468	646.248	502.023	462.946	566.483	593.397	435.236	655.945	511.063	508.023	467.558	534.998	484.636	632.798	781.745	521.555	534.262
DAG1	122.605	60.4103	76.7143	70.598	116.376	83.2518	71.1399	75.7053	96.6092	149.526	130.51	153.833	50.9389	92.8103	57.6792	77.3826	86.8051	55.2259	91.3134	48.1555	189.722	51.466	70.1687	57.8121	107.219	44.7191	143.96	104.416	84.2617	111.98	119.06	73.6181	107.71	104.745	97.2439	116.681	108.459	175.34	164.821	112.993	106.118	66.9409	70.3856	31.0075	69.8298	124.869	98.1413	158.988	121.216
DCN	523.943	136.406	370.817	115.12	94.2818	450.744	295.563	168.817	299.763	88.4707	110.617	471.978	49.8361	43.7837	113.794	51.6747	107.17	511.967	120.339	156.577	429.335	244.991	107.601	501.767	131.405	572.697	96.1862	213.468	12.2229	213.703	140.078	502.456	43.2898	318.269	199.213	179.595	163.815	232.922	211.535	324.941	259.931	915.114	34.9488	139.779	138.705	324.411	148.963	201.762	188.668
DCTN1	49.2953	22.354	40.6559	20.217	50.0342	42.505	34.6593	38.2119	34.4832	37.0176	32.2805	68.925	21.1724	36.3626	31.1576	27.4716	36.4182	30.6715	41.9347	14.4932	57.2425	29.443	17.1351	33.7113	42.5424	42.6142	24.4047	27.4882	39.2921	48.2579	52.701	35.211	22.5138	58.9091	40.0678	38.5547	46.7668	25.6894	41.4966	33.4386	40.8013	42.0782	20.5879	22.8979	33.3461	47.8138	46.8117	43.8538	40.3929
DCTN2	48.228	30.1975	32.8838	29.5771	45.9688	41.9716	27.6455	55.5904	35.4173	37.0215	44.4644	40.6359	32.7653	26.6793	33.8042	40.4942	36.2566	38.2043	34.8128	13.3987	33.9905	39.0284	21.2424	33.5988	36.1755	42.1984	34.5408	42.0734	36.5174	45.9907	37.7998	38.1395	31.3175	31.6332	55.18	47.2883	24.0453	28.0696	34.2298	40.5559	28.7416	38.1988	30.7587	46.497	37.9587	56.7325	35.2616	32.0017	35.3506
DCTN3	35.0941	69.915	46.9607	23.9285	43.7987	36.9033	28.1063	31.5823	44.1531	36.4647	40.1127	35.9545	29.9306	28.0559	37.429	72.6509	33.1524	46.7251	26.4065	21.8589	71.9267	47.0641	24.3824	40.3771	36.7912	49.6783	39.4287	38.886	28.7328	36.9624	35.7916	32.6323	34.9242	30.8912	35.3466	36.0626	20.8159	31.7361	39.0821	27.9875	33.2906	42.957	34.5472	66.9889	31.177	27.1915	29.6946	27.0274	41.7013
DCTN4	52.5012	35.192	48.0208	16.3507	30.3106	26.908	28.9626	25.6934	43.1706	25.8516	26.6149	50.8462	21.5452	25.1154	35.6023	45.3082	34.2702	24.7734	25.0053	19.5484	40.7461	21.3605	19.0836	33.3077	34.6137	25.4969	29.3285	25.9569	34.3532	40.9234	28.7314	28.8395	42.5388	53.254	29.5244	29.4899	24.3065	27.0906	25.9356	34.245	30.2396	37.3769	24.831	13.7364	24.4491	49.7908	24.2952	37.2649	37.8107
DCTN5	23.6176	11.196	21.2657	15.2116	14.0483	21.473	19.6412	21.9634	26.0981	20.1308	34.8469	33.3377	16.6541	18.4004	27.5325	13.1631	18.382	15.881	25.8694	7.0147	29.2133	18.952	14.7108	19.6521	28.1082	21.3265	28.7054	20.7249	25.4574	22.9284	27.6893	18.0991	26.8126	35.2841	20.8082	19.5424	16.4713	22.0587	22.2612	32.1807	21.6949	20.4203	20.3359	15.2757	18.8603	37.0489	22.6854	29.9878	21.2535
DCTN6	31.0563	13.0856	29.9168	12.3562	21.9801	27.1822	16.3965	20.4543	41.9373	18.3817	20.3152	32.1612	21.6981	21.2412	32.2943	16.585	26.7577	25.0004	18.7853	11.1243	32.2949	21.3191	15.6816	26.1945	26.4054	28.9274	43.0172	32.5113	20.1148	24.3237	14.9205	25.8956	16.2701	44.7785	22.0614	26.6807	18.4358	26.55	14.9168	24.435	19.8753	26.8165	23.3626	32.8067	21.1502	33.518	21.6569	22.0586	20.2186
DDOST	310.991	172.903	199.555	184.715	277.088	192.403	179.565	340.236	292.074	273.75	278.938	307.965	172.739	220.535	170.591	158.299	282.107	224.159	234.262	110.311	354.036	213.692	156.105	271.68	208.634	323.741	189.326	239.888	261.41	253.657	272.134	235.849	159.145	288.227	240.05	294.462	250.809	263.233	247.494	250.815	295.758	217.598	157.86	230.845	214.263	271.708	245.239	244.146	168.699
DERL1	49.7992	25.5556	42.7579	23.9716	54.3374	41.1427	38.3277	49.1488	59.2484	52.9023	46.4089	64.3978	30.8775	33.3311	42.6683	17.9888	36.7786	31.3495	61.6826	16.563	55.0763	34.3126	23.4077	32.2652	32.2803	35.5931	75.6432	46.8358	41.6395	36.0152	64.6697	37.6187	43.4246	59.4094	38.8793	33.0936	29.7653	38.7141	25.8322	38.1323	45.293	36.6228	26.7356	61.8176	32.0209	56.1649	32.8675	41.8002	40.5037
DERL2	29.877	18.9316	18.1923	14.8441	20.4991	19.3795	18.4901	16.8918	28.8065	17.951	18.1724	24.034	15.7536	15.4724	14.0786	24.5053	23.0874	18.8213	14.7762	12.3129	20.5574	21.6528	19.4966	21.9408	21.0588	21.2551	10.0632	20.6826	16.789	22.4574	14.531	15.6205	17.2026	19.7722	19.3068	17.2206	11.0596	15.3981	12.7283	20.5774	15.8404	22.2723	17.0283	16.5839	18.8206	17.7125	13.2326	26.9478	20.9847
DERL3	1.7443	0.91	1.3161	3.1615	2.8134	2.604	5.1984	1.3405	0.9054	2.1769	3.8711	5.5631	2.597	3.4754	1.833	0.8778	3.7548	12.0461	4.7956	2.5304	4.9894	12.2979	4.2733	5.5905	5.086	3.1952	2.4173	2.4599	1.8491	0.9186	2.1775	7.0732	3.7758	2.1727	4.7973	3.3986	1.8398	2.7569	5.556	4.2077	13.8997	2.4199	1.3511	2.7833	9.9342	3.6956	1.6978	13.0832	4.7372
DHDDS	27.7582	18.2151	18.1778	17.9655	15.0706	21.0363	14.7173	20.5499	20.3699	24.7942	17.2265	24.5692	13.6437	12.8186	15.877	16.1504	27.1777	21.1282	14.8629	7.7799	28.1372	19.2429	12.3184	22.4293	19.2628	23.2929	18.8458	16.7561	20.7839	25.139	30.1957	23.5604	9.9869	23.6293	19.0026	23.876	24.2847	23.5132	25.9005	21.3748	24.2132	21.4587	14.5801	14.7717	20.855	21.2669	23.8682	24.1809	18.6292
DNAJC3	139.633	46.3795	75.7582	34.8302	62.222	60.4531	61.6848	52.1882	121.515	78.6378	78.8232	122.005	58.7896	62.3766	95.3788	50.8725	79.6821	47.7038	35.9757	31.2503	68.7482	53.2813	46.6985	72.1681	58.7831	46.6879	48.7279	52.7727	43.7707	83.2123	33.4989	62.584	68.0788	69.4051	70.9806	62.6273	57.0673	72.826	59.1856	94.3743	73.749	75.5678	49.7742	31.336	58.8936	47.0175	76.7867	81.5585	73.8151
DOLK	36.3811	45.6836	28.8004	16.6702	17.7819	41.0239	22.8918	21.7934	50.7393	23.8429	33.3789	40.043	28.1519	27.3872	13.7606	41.292	30.9356	27.1288	34.176	13.4617	35.5295	29.5232	24.1584	30.1544	25.7201	40.393	27.4003	34.1038	42.995	34.2275	36.5034	23.8963	28.9449	21.3198	31.9628	25.5726	25.5528	28.3833	29.2692	38.0575	39.772	31.895	21.1148	43.4788	27.4864	46.5895	23.748	39.6476	39.4605
DOLPP1	28.4144	35.3351	28.2822	19.1002	26.2631	27.3265	21.7189	23.2192	37.0758	32.3585	35.7264	28.5191	34.7568	24.0976	33.514	28.4093	36.5215	17.8934	37.2757	9.3278	30.149	22.3593	21.3806	18.9019	29.6445	19.4239	26.5793	28.0317	56.1002	38.4527	37.8487	28.1438	60.5345	32.1446	27.0374	26.9594	36.7443	36.8247	23.3548	38.0403	33.2838	20.1918	26.707	42.1269	39.5357	42.8434	28.3737	26.8045	35.0402
DPAGT1	35.3999	15.8418	23.1337	16.3108	22.3222	18.6513	22.5054	30.6705	36.3275	34.1473	24.921	22.9569	22.0802	27.9818	30.7336	12.029	32.4334	20.1324	35.4682	11.8288	33.9206	23.9809	18.8604	26.6041	24.7078	26.356	28.325	24.5967	37.6904	35.7817	29.3146	21.1951	34.8526	40.1528	29.1614	29.9869	30.371	24.115	27.0232	38.1217	29.0747	20.3748	24.6764	20.762	28.1227	33.4474	27.5609	24.3846	24.0893
DPM1	106.228	48.0395	78.767	43.7482	108.915	91.4634	62.0098	74.747	166.846	69.2167	88.0003	128.826	78.4624	71.8039	92.43	42.7372	80.7107	66.5831	140.964	44.6711	99.4463	68.3465	18.0057	73.0645	88.7136	86.615	134.044	82.877	114.913	70.7825	95.6317	67.3069	70.1106	144.411	78.3117	77.1407	72.6689	88.1496	61.9932	94.6872	71.7033	86.371	55.485	154.271	65.5567	120.209	85.6599	68.6002	77.5437
DPM2	49.0761	90.913	45.9819	43.9963	43.65	69.1664	43.9729	50.2759	48.8429	61.3746	73.1294	59.4741	72.7248	47.192	73.8308	77.4027	42.6159	60.2616	80.0875	20.0063	47.2457	86.7067	43.4386	64.9639	52.4323	65.2458	58.7539	58.4468	99.3734	64.1856	62.6272	55.0134	59.4988	54.4369	57.473	48.7829	58.3494	71.8448	64.5882	68.893	59.1861	48.4725	61.2355	105.15	50.9096	53.3232	46.8363	42.9769	61.8198
DPM3	62.7615	131.006	121.015	128.903	70.2857	137.682	63.3639	75.5556	22.6282	75.5266	198.254	52.8294	88.9616	99.961	170.83	305.799	104.774	116.977	86.9941	46.1908	110.286	142.909	235.821	111.844	110.61	97.6714	89.8107	79.463	92.1845	98.711	105.018	110.989	81.1253	51.7009	81.6367	117.743	82.1212	126.048	93.9097	102.467	111.217	101.098	146.916	187.928	73.5854	61.8301	113.761	77.9429	124.526
DPY19L1	38.2116	11.5202	20.8353	13.5219	17.1451	26.5535	17.5407	42.0451	61.7857	26.2955	38.7123	57.9143	27.2844	23.8901	36.6385	9.1667	33.8354	23.989	12.5002	8.6982	36.9754	15.121	21.2852	27.1144	26.1371	16.6474	36.5948	26.437	30.9195	30.027	22.3149	20.3218	29.7441	38.3305	30.4443	27.6482	21.6016	32.8541	21.9176	33.2864	20.811	30.1924	15.5741	10.1514	22.8607	35.4637	29.5056	58.766	26.1551
DPY19L2	3.6876	12.5546	7.6273	0.8861	1.9307	1.7123	2.6544	0.9389	0.2625	2.0409	0.956	0.8607	1.3489	0.6531	0.4414	15.1203	1.2664	2.2048	0.9963	1.2173	1.3502	1.7808	0.7813	1.7533	1.611	1.3582	0.8894	1.1955	0.0881	3.6845	1.6165	2.0994	0.1575	0.5929	2.1465	1.3354	0.2807	2.2537	0.9969	8.07	1.2552	3.8456	3.4629	0.8155	1.1428	0.849	1.3542	0.5746	3.2517
DPY19L3	15.0852	8.262	10.7505	4.6806	6.243	8.4576	7.8202	6.9635	5.3207	10.1452	5.0479	11.4979	4.6724	3.5124	4.835	8.2465	9.2857	9.3754	4.6202	4.328	10.947	5.5906	5.6235	9.8747	6.4437	6.1777	7.3243	5.0425	9.3349	12.3835	5.1701	7.1072	4.6577	12.2849	8.124	8.0804	7.272	7.1185	7.7826	11.1618	6.6823	13.0894	5.6676	3.0835	6.7119	8.5006	8.6085	8.0057	8.8849
DPY19L4	25.8738	4.9618	19.0937	5.0212	19.8218	12.5963	11.9729	7.819	15.5495	9.6377	13.0759	35.5645	7.9325	8.6359	8.1474	5.6783	15.7904	9.1688	18.9217	7.155	25.3968	3.5846	7.1355	10.6252	11.8384	5.445	15.7016	7.2346	8.7832	18.4471	14.9453	9.4734	8.1374	24.7563	11.423	11.6964	12.7616	10.608	8.4168	14.212	9.0333	14.2807	7.3116	3.8193	9.6539	24.3071	12.2546	11.1171	17.4551
DYNC1H1	60.6883	22.7195	33.9547	16.7268	48.2039	30.6332	29.5085	41.7502	27.9417	30.8377	23.8325	62.3566	18.6145	24.4428	22.0963	30.1082	30.0276	22.4105	33.1959	12.6079	69.8055	19.6098	17.4822	26.3018	34.3248	24.8097	39.8057	20.9023	29.9329	44.1708	41.2574	30.6704	15.2838	54.2801	37.1227	40.333	32.6042	33.8799	34.8732	25.2024	33.1101	29.8337	16.8366	15.9123	27.7929	46.9397	38.2888	32.1651	36.6691
DYNC1I1	6.2962	16.3124	26.9244	3.4654	0.5214	4.8941	2.8485	2.9357	2.0601	2.7775	2.96	5.3277	0.7379	1.0696	1.4199	19.3605	1.4543	2.7684	1.8043	1.5794	3.5632	3.6048	1.0146	2.8151	4.2997	4.6289	1.5859	2.2321	0.303	4.444	3.0425	4.8324	4.1478	1.9572	3.185	2.8385	0.7045	2.081	1.5056	2.4442	2.5741	5.3039	3.8433	2.6075	2.9879	3.8077	4.307	1.8582	5.6264
DYNC1I2	73.9351	17.3749	43.12	24.5983	50.9629	41.7894	36.0407	49.9652	81.9444	47.3556	51.592	96.2132	34.0802	38.594	48.5988	15.1359	59.8222	37.407	42.4022	19.8753	82.8235	32.2951	26.0044	40.045	44.1409	38.2672	31.1562	54.9503	39.9405	55.5039	60.7766	45.3836	24.3787	80.3165	47.8694	54.5217	47.7583	45.3065	56.9177	62.0237	45.1015	44.3326	35.9	30.5667	38.3546	80.2449	56.906	62.1674	48.9111
DYNC1LI1	26.3564	9.233	21.0029	11.7323	15.2207	19.9936	15.4454	20.7522	27.937	17.5517	18.1433	20.3088	14.5454	15.2266	11.2858	15.9828	17.3049	17.8237	21.5606	9.6513	23.6826	18.7778	13.2064	17.6796	18.9768	17.2863	25.308	19.893	15.9295	19.9451	21.3712	15.2427	13.5943	24.3075	21.121	20.8591	14.7852	20.5864	17.8806	15.8547	14.9583	22.7216	13.0933	27.7964	14.6667	22.7199	25.2258	18.8922	19.257
DYNC1LI2	72.5949	17.2342	44.2335	18.5098	73.3751	41.0687	34.4321	43.1851	60.2925	37.138	41.3891	91.5127	25.0589	22.5686	42.1485	23.6296	62.732	28.0949	33.7481	20.2871	79.5285	11.7795	22.9338	32.6461	48.6452	14.9412	33.0272	16.2343	39.9644	62.601	23.3939	40.8026	43.788	75.9889	40.0111	45.1159	40.9184	34.1661	32.6935	41.0827	35.8239	42.8934	21.5942	8.5772	35.8117	75.649	48.267	48.4465	52.7567
DYNLL1	246.376	175.058	167.936	133.597	191.02	198.821	174.808	271.945	386.759	194.354	229.138	206.13	177.918	168.038	162.835	203.712	158.884	179.554	239.851	49.8274	246.987	165.163	139.364	167.943	161.38	240.048	208.497	211.678	241.399	129.851	226.831	113.386	170.837	214.231	145.138	259.337	195.788	161.715	177.014	230.676	123.385	220.055	189.556	226.589	174.504	209.045	257.388	153.683	183.457
DYNLL2	83.43	71.3449	78.5172	46.1577	63.7393	63.2165	54.2504	42.9368	46.9678	56.8837	56.2597	62.2549	63.5931	31.5745	47.5398	102.216	63.1938	37.1422	68.0579	25.312	61.8131	50.1554	33.0221	52.0082	80.1771	52.3272	70.2645	53.7602	57.7155	65.3529	42.2962	44.3478	61.1064	73.3378	67.1937	64.6493	41.3421	53.2076	34.0147	52.0093	50.1994	59.1139	53.1697	61.4422	72.9007	64.9152	63.9054	46.3239	65.6823
EDEM1	49.1612	12.8644	28.6927	17.296	43.8962	39.1906	31.3098	42.5743	44.0548	32.6923	34.8331	63.1688	19.9295	21.5222	22.9841	20.2104	34.6993	38.1266	34.1804	19.7452	44.8143	33.4838	22.9717	43.6202	28.947	27.021	34.5175	27.8882	31.6375	38.229	49.956	30.4264	25.2313	49.0193	39.2591	42.3803	42.8592	33.9935	35.4026	37.8874	36.1913	40.1176	15.9358	47.397	33.1483	40.1024	40.2099	55.6066	33.6967
EDEM2	95.0732	61.5211	52.0226	57.1169	76.2616	55.4095	55.3097	85.9873	84.9137	91.5896	65.6311	90.6759	90.7787	65.777	46.1334	65.7259	58.0683	67.5605	89.4344	37.0482	67.5752	70.3473	35.1715	106.076	62.1958	79.2479	74.1272	66.8256	78.1854	85.3403	89.7265	55.9358	39.7583	82.8066	65.6162	91.3023	69.1615	91.2838	78.4595	58.1929	88.168	62.8605	46.567	74.3672	58.9866	73.7424	93.5531	72.1946	58.9909
EDEM3	59.0043	16.1099	64.7777	14.4188	25.8935	23.0006	27.947	26.0919	41.167	40.0817	25.8073	50.958	20.6675	19.1804	37.2016	17.799	66.8282	15.7237	24.0707	16.3157	99.5518	10.823	43.4203	28.209	42.8443	14.1883	48.8207	20.2899	71.0239	46.207	19.5637	23.181	87.2415	51.6682	32.0022	25.4372	39.4903	40.6616	51.8628	93.8945	27.7292	32.9295	51.1193	6.4428	30.4647	44.8356	49.8543	37.7604	51.987
EDN1	57.0749	9.6998	47.657	21.7356	15.2155	75.6305	65.9227	56.0132	26.0569	70.5973	46.1269	8.5623	39.5054	18.0378	8.8086	8.5149	26.012	31.8816	31.0626	21.7963	87.8647	20.8188	11.3874	28.0389	21.963	17.4848	12.8156	48.5495	4.1293	70.1341	23.5439	10.404	12.3739	76.9688	44.507	87.7613	9.623	14.9136	54.0277	57.2278	53.4982	27.4773	20.9621	17.0965	30.2391	23.1721	53.6737	77.2854	61.3381
ENGASE	11.4184	19.3746	20.4652	20.4759	31.0605	18.4822	10.5861	10.8918	4.1514	18.305	11.436	9.0962	21.7369	11.5489	27.2135	24.1548	16.6294	25.8239	15.4098	6.1985	22.5811	14.9245	16.0162	22.7975	15.9285	10.3443	24.322	5.9059	31.0667	33.6108	24.6153	24.3205	46.2051	12.3225	16.9169	23.5219	10.8892	25.2283	22.3558	20.5183	15.3678	13.4124	14.2347	10.0065	22.0708	23.0398	15.0077	7.1064	54.4472
ENTPD5	7.5544	2.8141	4.5761	4.349	15.7615	3.3228	6.3646	6.9101	5.3794	6.3202	3.4403	10.8629	4.1488	3.3262	18.9203	2.2752	22.6415	4.3761	7.5369	2.4377	21.1082	2.6315	18.4736	4.7051	6.8147	2.9173	7.4261	2.541	5.6451	6.618	6.1464	4.8308	9.8401	22.3649	4.8362	6.7129	23.0904	7.3281	11.5531	9.5639	10.0792	5.0801	8.5683	1.8872	16.2468	15.4704	18.639	9.9388	17.7361
EOGT	26.7914	9.1406	14.7764	6.3592	9.9102	23.8832	12.1869	19.0592	22.6653	12.1642	21.5893	24.7995	10.9778	10.963	7.0121	11.0683	21.4025	23.3662	7.2404	7.1058	18.4788	11.2045	13.7636	20.0528	30.4006	13.1743	20.7197	12.8337	4.4224	18.8493	19.3334	12.2841	11.3084	22.8135	20.1506	20.1239	12.8008	16.0766	13.6052	19.8861	15.3528	29.3368	10.1848	8.5671	15.9001	16.137	12.1395	16.5592	24.0673
EPHA5	0.3086	0.0816	7.173	0.0407	0.0938	0.3194	0.1476	0.0609	0.1415	0.0199	0.1023	0.1733	0.0129	0.0186	0.012	1.3488	0.0214	0.028	0	0.0868	0.1264	0.0244	0.0255	0.0572	0.2156	0.0764	0.0491	0.0491	0	0.038	0.0149	0.0809	0.025	0.1269	0.0196	0.1524	0	0.0355	0.0187	0.205	0.0243	0.2633	0.1354	0.0411	0.0479	0.0444	0.1863	0.1204	0.1338
ERP29	177.597	445.935	174.304	126.403	124.308	229.455	154.728	221.09	207.916	171.66	204.822	138.489	185.321	129.765	155.14	818.153	185.044	155.053	195.145	89.1333	140.756	239.573	135.511	192.488	230.405	222.362	216.611	196.674	272.619	162.772	147.711	141.699	150.364	132.929	157.944	217.203	121.155	141.527	168.54	127.556	143.491	157.107	165.237	238.412	186.795	172.532	133.37	181.209	187.922
EXT1	44.576	10.4815	23.2464	22.0036	36.2218	31.9629	31.6534	74.4911	47.5714	43.1028	36.6769	57.4367	28.6357	31.8483	45.3079	9.4451	33.8416	38.6294	34.5046	12.1929	66.2272	24.0348	17.5031	29.8508	20.9799	29.8282	39.519	29.0705	26.1625	31.6978	32.4926	28.4115	31.0615	52.727	38.3298	38.6558	27.8323	26.9997	26.5326	30.4985	36.2955	33.9081	18.7087	27.3056	36.4411	37.6249	37.0606	23.9992	38.5524
EXT2	43.3052	17.6378	21.0362	17.6059	24.8926	27.4973	21.6178	37.7323	46.544	27.7677	28.5174	48.721	19.5892	25.6317	19.351	13.8705	21.5994	25.6067	20.7256	11.3999	40.7656	23.4717	12.5797	27.7234	23.3166	26.29	22.3275	23.9717	18.149	29.4658	27.2514	26.6109	22.5638	39.5509	24.7164	25.6392	21.5571	24.392	24.9181	29.9667	31.4587	33.8164	15.1931	29.2656	26.7215	56.1651	27.8794	36.0489	26.6117
F12	1.0511	13.9664	4.2787	4.8314	7.9174	7.2404	2.3607	11.9908	2.2566	11.828	7.2377	3.0237	10.962	9.2634	6.7609	4.1109	5.6751	2.1613	11.1561	0.6661	5.2616	3.2775	5.0677	3.6716	16.6019	4.2646	26.8116	2.8819	3.9099	4.1574	23.3033	3.7737	9.8848	7.7454	3.0766	3.3335	12.3973	7.6578	8.7839	8.7776	4.9811	1.8343	8.0522	5.323	5.1658	10.8464	12.4312	9.0768	11.5854
F5	46.2555	61.2834	2.5789	27.6012	15.7387	8.5946	16.4811	5.2247	3.0993	22.0265	10.4082	2.7986	2.9246	1.1859	125.053	49.5452	78.6709	1.7794	24.4683	5.1877	10.3623	18.6856	7.9583	16.6285	22.5921	2.6682	1.6918	11.5656	19.7446	103.786	4.5654	4.5007	34.1866	64.0191	52.8384	26.7495	34.0127	39.9625	69.1871	43.3299	23.8098	2.381	48.7052	0.7754	6.5904	56.6367	90.367	4.0229	44.4627
F8	7.2962	3.6484	6.1662	1.2258	4.355	1.9141	2.9299	2.7595	5.0191	1.0096	1.7084	5.1601	2.2641	1.533	1.7438	4.5501	2.5558	3.4042	1.6746	13.4197	4.6243	2.2399	1.5149	2.7131	1.9913	3.3995	1.5869	4.3448	1.2452	3.9786	2.6239	3.153	0.5376	2.6885	3.4475	2.3313	1.3249	2.7064	1.8664	2.0665	3.6555	3.5338	2.003	2.0699	1.9707	2.4971	1.2694	3.8402	2.6821
FCSK	12.5333	12.3779	10.5873	12.7477	19.7527	9.4924	9.8971	14.8115	3.5534	13.2273	12.4868	8.9707	13.6599	10.6594	11.3348	16.3504	10.7511	10.8986	11.8441	4.7171	16.264	11.6516	7.752	10.1941	10.8804	9.8488	13.4916	8.8911	27.0426	21.3222	8.9526	10.6552	20.6973	13.8113	11.1663	13.5071	11.7985	14.5692	21.2538	18.6145	13.0335	8.7219	12.9785	8.3665	12.7896	18.7599	17.2068	10.0907	27.5249
FKRP	10.0302	18.5257	16.5598	8.9075	11.2478	14.7568	9.2231	17.2736	7.2161	7.6881	6.8829	9.2847	11.0084	9.7798	3.5578	21.7813	9.1391	10.5088	8.6208	4.0948	12.9111	9.9399	4.2634	9.893	8.5138	8.3755	7.3628	5.6042	5.181	13.2945	7.8934	10.9287	4.0818	8.1891	12.1676	6.653	5.3892	7.6231	10.2321	10.7059	11.9466	12.4468	8.65	8.8625	9.3178	10.1925	12.4506	6.929	10.2459
FKTN	5.269	2.1894	4.7658	1.2614	2.3229	3.4333	3.3992	2.9401	4.26	3.301	2.8456	4.7577	2.6139	2.1318	3.0147	3.7415	4.541	2.3155	3.1674	2.0399	5.8774	1.6976	1.7888	2.7428	2.7705	2.0605	4.6059	1.976	5.3653	5.2591	3.3981	2.4938	2.3479	5.5569	3.3962	2.5689	3.44	2.3322	3.4034	4.8102	3.4036	3.7944	3.2122	1.5515	2.3946	5.5063	2.4279	4.7485	4.8339
FMOD	211.71	50.828	124.022	89.2055	55.1553	263.596	132.33	136.467	254.795	74.5663	71.7116	218.796	48.4041	47.8103	78.9448	26.5792	145.854	186.264	51.3071	63.0085	162.287	115.979	73.0759	275.961	202.118	264.817	79.2197	92.084	246.922	176.137	79.1753	202.056	55.8805	203.692	112.486	157.179	75.1962	153.064	76.7679	206.233	116.58	295.305	53.314	108.838	222.408	172.203	67.4844	152.433	126.576
FOLR1	102.703	0.3468	42.8621	78.9567	27.3065	11.0212	47.8913	45.8071	6.389	45.2738	30.8162	9.5229	526.101	46.8468	22.2456	11.7806	246.518	5.4948	8.2368	17.8921	5.6932	138.303	45.2615	34.3669	20.7371	16.4254	8.7984	20.6819	0.0617	173.236	2.5129	12.5946	3.4645	10.3894	76.5527	49.5695	4.1912	73.3743	27.3205	41.0682	59.7987	5.9686	75.652	7.5239	9.1498	17.088	22.8824	3.3646	26.7373
FPGT	20.9883	4.6485	10.9064	5.2225	8.2714	8.7741	10.6508	7.4619	10.0623	11.5188	11.0812	12.4375	9.1448	4.9241	4.0627	5.2137	17.5623	6.5549	7.4413	5.1372	15.7455	4.8382	6.6227	9.7336	8.0494	8.4481	5.0453	8.1269	7.45	14.0927	9.9047	5.776	5.5074	12.4021	9.8889	10.3502	12.5476	12.4974	12.9211	13.2441	8.2248	10.5454	9.1788	3.6062	8.4305	13.0272	11.28	8.3667	12.6751
FTCD	0.3321	3.7683	11.7404	1.2382	0.5087	2.4465	0.356	0.5225	0.0739	0.3329	1.2274	1.3394	0.4019	0.3125	0.4259	95.0248	0.3163	0.3309	0.2804	0.3083	0.5165	1.4193	0.9235	0.3172	0.2855	2.6971	1.7441	0.4683	0	0.4872	1.0566	1.2775	0.2363	0.0834	1.2468	0.6274	0.5769	0.0787	0.883	0.6533	0.6646	1.076	1.1427	0.3848	0.6728	0.3551	0.4492	0.1842	1.2671
FUCA1	176.901	76.4493	113.372	149.567	127.039	82.5241	91.9566	130.107	107.745	270.964	186.575	106.192	60.8629	65.8895	61.6499	66.2542	147.352	91.9062	99.2425	46.6607	263.952	157.603	59.8103	251.741	71.9673	188.165	82.4631	128.083	102.247	145.937	156.786	107.892	52.8817	168.431	167.946	240.502	238.157	121.616	161.358	104.595	153.819	148.919	86.0547	67.4925	152.245	138.253	241.283	175.139	103.819
FUOM	19.0621	11.657	20.5662	35.8633	6.1708	22.5499	19.0519	63.3082	15.9794	31.457	22.6135	37.6551	18.1292	19.5252	5.3858	6.927	14.8978	37.665	73.4751	6.6557	32.017	36.3175	5.9179	51.2362	10.3689	22.946	12.9296	22.9029	1.012	17.4552	12.8441	26.2808	27.5961	26.9584	22.5329	32.8861	25.6632	21.9056	11.697	22.1007	24.1567	33.2035	8.0769	37.4625	55.6805	37.4053	49.3058	33.8036	18.3034
FUT3	28.6622	0.0595	40.2331	39.0785	71.1238	31.2	25.3191	42.5751	73.3021	168.975	144.079	65.7001	101.388	20.9219	216.707	1.7149	91.8251	17.6259	64.1312	6.2065	69.753	19.4891	58.7426	23.4384	54.5063	31.8484	97.6067	73.3608	208.34	76.4305	102.84	124.405	208.42	87.7192	45.8056	91.6049	82.8964	124.518	109.218	106.639	37.4746	5.1755	68.8735	62.0134	58.3195	57.141	73.9739	110.061	102.502
FUT4	15.3902	1.7714	10.5193	8.7338	3.297	7.1661	11.1992	9.0309	17.5031	22.3151	11.0475	11.253	11.9563	17.2272	14.6368	2.7939	12.6502	7.9099	6.5412	3.84	22.2428	6.2535	8.931	7.898	19.588	4.8273	13.2317	9.7783	21.6353	12.9494	6.0001	7.5316	35.4268	14.5383	14.026	13.6142	6.0572	17.9919	6.9012	21.7289	10.4026	11.7215	12.0379	3.3209	13.6711	11.3025	18.9564	10.8369	20.0511
FUT5	0	0.031	0	0	0	0	0	0	0	0.0327	0	0	0.0319	0	0	0	0	0	0	0	0	0	0	0	0	0	0	0	0	0	0	0	0.0246	0.0696	0	0	0	0	0	0	0	0	0.0248	0	0	0	0	0.0615	0
FUT6	14.2437	0.0543	12.7952	8.1531	16.2732	9.5799	9.3639	9.2002	20.8628	32.0172	16.8532	20.5781	13.5271	2.8777	44.1399	0.4842	44.2387	3.6719	22.0909	3.91	10.9331	10.454	9.3491	4.8115	7.371	14.1199	7.1597	21.0787	83.2539	31.2036	38.9575	26.3679	47.324	27.8475	12.601	22.0058	20.0951	25.8251	24.3883	21.4409	16.3475	2.321	25.1029	11.3047	16.7088	24.2087	21.1204	21.3027	30.6299
FUT7	1.743	1.0021	1.1494	1.2035	0.6472	3.2239	1.2617	0.7204	0.3939	0.9787	0.8405	0.5698	2.7936	0.7717	0.4257	0.5213	0.5818	2.1503	1.5093	0.6935	1.2464	4.9539	0.3768	2.41	0.1679	1.6468	0.3875	1.0656	0.2379	0.9741	0.5281	0.4151	0.2658	0.6255	1.1595	1.0193	0.3296	2.0465	0.8276	0.5598	0.7901	1.2241	0.5638	2.146	0.3894	1.0518	0.7756	0.5893	0.6861
FUT8	29.4235	10.1246	14.1761	16.0153	19.0319	13.5871	17.0647	28.938	29.0088	23.7002	9.1868	25.4254	10.0746	26.0205	42.2294	6.9741	32.6727	21.5694	17.6502	9.1733	33.6322	12.8911	19.1142	23.3293	51.1113	18.679	30.4965	25.4634	19.755	13.2288	16.5254	16.9549	37.2434	30.6492	17.7071	45.3649	24.3025	34.2165	35.399	37.2118	20.235	20.0167	18.3307	10.0904	20.8133	32.232	40.2716	25.3824	26.0413
FUT9	0.7385	0.4628	0.0348	1.2196	0.3694	0.0202	0.376	0.061	0.0119	0.2275	0.0733	0.069	0.2177	0.1735	6.4167	0.0146	0.0122	0.0934	0.522	0.9826	1.4227	0.0175	0	0.0102	0.9226	0.2267	0.0879	0.1837	0	0.1361	0.1758	1.1634	0.0072	0.0353	0.2105	0.0759	0.3691	2.2424	0.0067	0.0113	0.1478	0.0718	1.0453	0.0049	0.8227	0.6016	0.1532	0.0773	0.1725
GABARAP	0.601	1.1698	0.6214	0.6151	0.6301	0.6156	0.441	0.6444	0.4614	0.4336	0.315	0.2427	0.5216	0.2817	0.3627	1.0931	0.6465	1.2682	0.3306	0.3501	0.6371	0.7785	0.4815	0.7564	0.4576	0.9353	0.2888	0.4401	0.9121	0.8937	0.1875	0.5984	0.6793	0.4973	0.4939	0.4676	0.2457	0.5811	0.235	0.3974	0.4283	1.0428	0.6825	0.5174	0.4523	0.5824	0.4868	0.3556	0.4496
GAL3ST1	4.2341	7.8127	12.7239	14.9008	8.068	18.4764	6.7232	18.5888	2.5646	13.5177	37.3877	4.4365	28.8934	9.3144	12.1932	32.4292	12.4844	4.382	2.1304	1.9311	7.7833	7.0509	12.8094	4.223	6.8869	2.0114	7.8022	5.7394	9.327	12.0717	1.6544	11.2641	20.6017	4.0531	6.4443	6.2525	4.4246	33.5879	10.8438	7.4655	7.1933	3.9838	14.229	0.7175	7.4512	10.1243	32.31	9.0187	13.7175
GALE	38.418	4.7258	17.5086	86.7396	72.9278	25.4605	15.1177	71.1744	53.505	87.7361	96.9847	45.1816	62.6376	38.7152	99.1756	8.0379	127.336	23.1468	67.5014	8.279	84.3137	29.8523	114.24	34.0423	48.4763	34.833	51.9186	39.8658	119.257	57.6253	50.6209	60.3214	59.5356	62.9974	55.6679	81.0051	95.3574	107.739	89.9594	70.1839	60.5169	11.8935	61.4978	29.3	66.1192	49.2166	97.209	62.6005	52.0542
GALK1	18.0421	22.6212	18.5807	20.4841	24.1374	22.5601	15.6899	36.2523	16.8334	19.202	20.629	21.5577	36.6188	31.5494	16.6939	8.4411	13.5219	33.7191	36.8432	9.0293	23.8121	29.182	15.5799	35.8039	14.3884	21.5248	29.1521	15.6599	101.765	27.1658	19.5889	19.9426	38.9678	16.6667	21.2966	31.8232	20.8587	24.1128	16.8139	11.6817	28.6329	26.7166	10.553	33.2853	41.0547	21.7609	19.4316	19.982	29.6267
GALNT1	129.762	34.284	55.2826	34.4377	90.5922	43.4155	58.1322	54.7165	107.563	57.6784	49.5083	96.1934	41.9632	34.6727	40.0313	20.6074	82.1047	71.4183	82.8685	27.2749	93.0184	45.1454	30.1668	66.8703	48.2658	86.4062	40.9218	59.5074	86.7677	69.2186	26.0713	77.1722	28.5359	72.2534	73.4959	46.535	52.148	44.5749	53.0763	57.4786	58.767	122.073	32.2869	30.5623	55.1005	67.3614	41.1606	71.18	50.704
GALNT10	49.7701	9.4972	17.9373	30.8441	51.4681	39.8801	26.6486	65.8275	41.297	33.4752	31.2162	91.0881	27.1959	60.2442	30.1682	8.5974	36.4367	33.3774	14.2232	9.3995	42.1517	24.4698	20.676	44.307	36.4583	34.6569	37.7848	28.6274	46.6514	36.7474	29.347	32.2695	53.4395	35.069	25.7223	24.6572	38.4954	30.4106	43.6388	44.8548	40.1476	54.7659	24.6436	18.0804	38.4001	51.2931	36.4742	22.8342	50.7706
GALNT11	27.1707	22.1568	21.8783	9.7774	14.5915	17.6337	17.3087	13.4715	8.6984	15.1203	13.9145	27.4448	8.7945	10.6633	11.0418	21.8561	12.8854	17.2815	9.6764	12.4497	26.7085	14.4094	8.7734	18.6358	12.9398	15.9682	15.2964	17.4568	13.2044	19.1889	16.866	15.0648	12.9169	20.3369	18.2522	14.8898	15.0689	15.2786	20.9884	16.858	18.3857	29.1959	11.6624	8.8665	15.0412	22.3628	15.9292	19.6312	16.68
GALNT12	19.1707	6.2152	25.0512	16.516	47.3226	21.2717	17.0341	11.686	41.6645	51.543	71.069	15.5535	15.308	21.0276	26.6705	10.1884	71.1548	7.2939	16.593	7.2949	50.139	17.4466	48.9215	7.9903	56.3273	19.9346	52.5773	38.3422	121.686	43.8998	32.2304	47.5321	54.1864	28.5892	15.9168	13.5417	51.6885	75.2829	31.1647	58.4823	19.418	10.5541	22.7262	7.3331	27.8172	41.149	28.6926	11.2526	63.1427
GALNT13	3.5207	1.3004	2.9373	0.2668	0.2082	2.2118	0.7611	1.208	1.7251	0.5291	0.3618	1.9963	0.8141	0.2575	1.8824	2.7999	0.3925	1.7938	0.2698	0.8357	1.0249	0.8787	0.1886	1.7671	0.3361	2.4809	0.3879	0.2505	0.1637	1.2002	0.2423	1.5181	0.1035	0.6783	0.6819	0.3434	0.5464	0.4465	1.1875	1.2376	1.3931	7.8536	0.4678	0.8309	0.4607	1.1121	0.3371	0.5039	0.885
GALNT14	7.5894	3.408	1.3784	8.0117	7.6939	15.0354	8.4044	31.6562	15.0135	38.3296	10.7143	24.1756	41.977	18.3763	2.742	2.8229	6.7752	9.2397	10.262	1.877	36.7059	11.9794	4.2821	5.2573	24.8807	7.3509	32.2417	3.8174	0.0228	9.0595	6.8366	24.0762	3.1865	7.6741	17.7224	15.0292	3.3258	6.083	1.9632	7.5679	17.4636	2.3133	13.8728	42.3071	2.2888	4.0242	17.7883	1.3997	23.8277
GALNT15	8.2752	4.5196	7.2255	2.098	2.3166	5.1957	2.1504	4.4052	7.6448	1.9313	1.0824	5.3407	1.6792	0.7156	2.1187	1.0308	1.0838	41.2446	6.1581	1.654	9.0431	3.0846	1.7123	12.6137	3.6089	5.8857	0.6036	2.0373	0.7722	6.0315	2.7998	8.4805	0.5828	9.03	1.6257	3.8884	3.7439	2.7249	4.9137	8.8183	6.5179	6.2892	1.9954	2.8596	3.0146	5.2708	1.4626	3.3152	1.9596
GALNT16	7.4615	8.573	6.8042	1.6952	0.7105	3.9977	7.5479	2.3243	0.3355	3.6842	2.0864	1.7185	0.6215	1.0018	1.2552	0.6861	1.2985	2.8142	0.3689	1.6984	2.1688	3.7869	1.224	2.8324	1.7963	7.0748	1.8821	2.1256	0.069	3.9224	1.6337	4.1017	0.4325	0.8949	4.1359	1.4496	0.3883	3.7054	1.024	1.0417	2.7235	6.3737	1.4586	2.0079	1.1087	1.5747	1.9591	1.7232	3.5663
GALNT17	5.1429	2.9614	2.7692	1.7979	1.2871	10.3234	1.9333	3.9626	2.7416	2.4591	2.2487	5.9391	0.6757	1.5347	1.6865	1.7427	3.1952	4.2308	0.6881	2.5379	3.3009	3.462	1.1387	2.6558	8.6519	5.745	2.4666	2.5654	0.3433	4.3506	1.3449	3.393	1.434	2.322	2.5786	4.2728	0.6994	3.0466	2.1168	4.2134	1.829	7.0781	1.5918	2.7633	2.1032	3.6516	1.9958	2.8595	4.8742
GALNT18	39.9637	19.9038	26.8273	22.8211	15.2351	31.4903	18.0613	21.0509	18.6859	31.2589	23.5453	16.8971	32.7835	24.1038	13.4974	23.2874	18.9584	20.1672	11.7406	7.794	20.0447	34.7875	18.1708	20.736	22.1748	20.3954	18.0477	16.5614	2.9173	36.5789	23.885	14.6633	12.6301	13.2266	25.2176	28.643	11.5944	23.0893	14.516	15.7381	17.4814	24.9081	13.5733	19.7282	10.4811	9.7626	14.9305	17.827	22.9093
GALNT2	64.3027	20.3803	53.2552	15.9171	56.1898	40.2733	31.4928	56.5057	72.7259	49.2634	46.0569	68.0021	42.2834	45.8073	19.6195	10.9751	32.9565	35.5403	22.3688	25.2035	61.0138	24.4929	26.6213	52.1558	39.7217	50.0349	34.2451	34.9258	28.2915	42.3423	54.5195	30.653	29.1255	38.1219	39.0809	46.2653	33.5163	27.7734	41.1287	28.5128	48.5342	54.5431	14.1386	38.5601	31.9174	46.1961	38.4603	56.2545	38.7407
GALNT3	88.1489	6.936	53.9787	26.3258	102.265	28.8882	38.1852	48.4911	107.704	60.628	57.2619	59.1624	36.867	33.779	89.2773	7.7843	142.59	11.0028	59.8624	21.6383	99.3633	14.963	56.8848	21.5297	90.5373	17.1095	66.0223	45.6783	136.345	99.5723	38.0165	49.49	83.7845	118.254	70.9262	47.2524	89.8524	97.8336	58.5678	123.036	54.5883	9.9548	47.8002	15.7349	55.2665	102.005	99.7749	51.1418	66.9212
GALNT4	0.1793	0.0344	0.5116	0.1273	0.4994	0.1029	0.2097	0.2001	0.1216	0.0967	0.5395	0.4045	0.2244	0.2268	0.5256	0.0743	0.9604	0.0681	0.3194	0.1665	1.0442	0	0.3257	0.1435	0.487	0	0.5082	0.01	1.23	1.2257	0.1223	0.5518	0.7019	0.2574	0.3042	0.242	0.2416	0.2753	0.2895	0.2016	0.532	0.0687	0.1557	0	0.2403	0.3814	0.2772	0.8866	0.8308
GALNT5	12.6195	0.1179	2.1358	11.444	22.9288	21.0551	11.8437	34.3156	69.5752	20.9447	23.3744	51.3333	5.3991	11.6807	34.0779	0.1698	43.3034	12.9481	79.5202	2.5286	56.8932	4.1601	3.2253	11.7511	16.8954	18.218	143.747	23.5638	68.2423	13.1327	33.4493	22.6668	18.181	81.8228	25.7736	39.3394	40.3251	42.1253	47.4719	33.2265	10.4103	7.864	12.339	11.9087	21.8921	41.9253	33.9982	20.0794	24.7807
GALNT6	16.541	0.9236	3.1101	15.9922	8.4916	7.0163	11.4314	21.6424	18.1659	30.2879	21.8872	11.7421	4.441	14.9968	52.3123	1.3062	42.8117	5.4755	13.1691	4.4393	11.2703	7.0503	21.0047	15.4274	53.9682	6.4866	50.463	14.1267	40.9999	9.1875	14.0581	30.5508	47.1681	15.5554	9.9933	9.3917	17.1853	43.7416	27.6455	60.0698	13.2989	5.2361	35.8506	8.0054	37.9872	27.2733	41.2667	14.3416	36.0567
GALNT7	29.4042	6.7784	13.4001	11.4933	26.1413	17.8195	13.4994	34.1331	50.3097	29.4312	39.4491	42.7785	11.7544	16.1058	36.5558	6.4129	73.1445	12.4794	29.5121	8.2784	71.6298	8.326	30.1054	17.5081	23.4933	15.0036	35.1914	27.4122	117.493	34.6158	29.3258	22.1778	38.8892	35.6559	27.7438	21.3169	39.7428	28.9804	24.7466	16.1974	32.6712	12.0999	18.6119	5.9218	25.2106	37.5264	46.3344	13.2071	27.7961
GALNT8	1.3698	12.2785	7.7932	0.7738	0.0694	1.6054	0.7159	0.3378	0.3139	1.2188	1.1979	0.6411	0.2584	0.0689	0.5057	34.8344	0.1044	0.7859	1.2616	0.4721	0.6144	2.7782	0.1838	0.6185	0.4659	4.445	0.4723	0.3028	53.7695	0.9275	0.2806	1.4131	0.3213	0.7351	0.9568	0.2794	0.1545	0.2559	0.3518	0.35	0.3368	2.254	3.3278	2.4907	0.9427	0.4142	0.5512	0.2395	1.4253
GALNT9	0.1531	0.0428	0.2395	0.1427	0.0639	2.5886	0.0522	0.3986	1.6005	0.1986	0.7983	0.0263	4.0496	0.2626	0.0327	0.0277	0.1225	0.178	0.0398	0.0651	0.2217	0.0887	0.7558	0.2242	0.3483	0.5956	0.1228	0.067	0.0274	0.5701	0.3754	0.1693	0.0136	0.1058	0.2272	0.1536	0.095	0.121	0.229	0.3012	0.2318	0.2737	0.0547	0.1867	0.408	0.1879	0.0565	0.4189	0.1338
GALNTL5	0	0	0	0	0	0	0	0	0	0	0	0	0.0575	0.0184	0	0	0	0.0276	0	0	0.0178	0	0.0189	0	0	0	0.0485	0	0	0	0	0	0	0	0	0	0	0	0	0	0	0	0	0	0	0.0132	0.0204	0	0
GALNTL6	0.1791	0.3404	0.1312	0.0866	0.0333	0.1399	0.1396	0.0518	0.0531	0.1197	0.1572	0.1844	0.0757	0.2577	0.0128	1.6369	1.5968	0.1983	0.0388	0.0231	0.365	0.2768	2.7785	0.0684	0.169	0.0639	0.0261	0.1684	1.4655	0.1348	0.0871	0.3789	0.1593	0.0525	0.1147	0.0353	0.0963	0.1887	0.1687	0.3859	0.4327	0.4603	0.0747	0.051	0.4138	0.0662	0.0587	0.106	0.2373
GALT	9.1085	11.1556	8.2774	9.1809	8.5428	9.3074	6.137	5.8957	9.674	13.8341	8.0635	6.7902	7.649	6.6384	8.9378	17.6633	8.7772	10.9582	11.0423	4.4463	18.977	11.6812	6.7647	7.7653	6.6852	9.4256	8.5845	6.6488	11.7322	12.6603	12.1332	7.706	11.7173	9.1842	9.9479	8.3682	5.3291	8.6478	12.9422	7.7061	8.2345	7.3303	9.9258	9.5895	10.3724	8.3399	8.436	4.1207	12.6193
GANAB	417.419	165.531	239.76	144.675	351.047	220.633	202.279	283.184	422.229	279.563	253.776	388.145	173.446	215.661	186.181	201.66	255.454	214.081	259.791	104.757	365.843	195.677	138.124	236.012	229.728	264.507	162.331	213.499	263.03	310.31	303.324	221.367	202.685	404.455	281.512	267.272	207.183	264.717	230.741	250.025	252.999	244.283	134.573	223.866	208.105	264.753	189.904	325.51	216.662
GBA2	50.3462	68.1577	47.3594	27.9014	52.6934	36.1218	25.6585	25.3154	35.1649	47.5633	40.2274	30.639	47.1026	19.0999	75.4535	63.3155	63.483	37.853	31.8132	22.3363	128.984	35.1001	45.2093	36.1957	43.4143	35.2867	37.7244	21.7321	139.964	65.0834	19.966	34.4031	51.15	33.0873	41.9275	35.2304	21.8258	36.787	47.2142	31.2854	36.9454	33.822	36.255	27.6717	58.4875	36.7237	34.592	26.6279	60.9626
GBF1	19.2478	14.2865	17.2907	7.1843	23.6459	14.7562	12.5001	17.2666	14.9145	16.4902	14.7169	21.9737	14.9334	9.049	15.9844	15.872	15.8864	13.5369	13.5258	5.9317	22.5987	10.475	7.436	14.7008	16.6706	12.0149	12.7026	10.4702	20.2158	20.5346	20.2122	16.1986	14.5964	22.298	15.096	15.9499	15.646	19.2921	17.3979	16.8607	13.4146	14.8545	10.7176	11.4573	15.8501	15.6636	20.1118	16.3957	18.466
GCC1	28.4995	15.8746	22.3772	11.4847	13.2747	23.3094	18.7854	16.7088	19.3946	17.5439	18.9809	21.7387	15.5612	11.5979	17.7158	21.8216	21.2679	12.1605	17.4339	8.8888	32.6924	17.2718	12.4984	17.0652	21.9666	18.5016	22.1899	20.9	39.1976	23.4484	31.0945	14.4785	23.5148	23.9766	20.2756	15.7184	13.4295	24.4807	16.2494	17.7992	23.1007	18.8078	12.6615	17.0744	18.8362	34.7087	25.1232	28.6793	18.5293
GCNT1	8.6559	12.9224	21.3917	6.1218	8.9614	4.7334	10.491	4.9959	11.3134	17.0067	5.3392	41.1913	3.9532	3.651	25.7764	17.398	3.645	5.9137	12.8526	4.0378	15.1695	6.0399	1.6113	6.1831	10.2115	7.0601	25.3983	3.9505	7.2133	4.5099	3.6135	15.4927	56.5192	20.2501	6.2284	4.0428	5.3883	11.2088	9.5059	11.8847	7.3294	16.7603	24.122	5.2957	16.1528	23.3937	12.0196	10.4855	11.1414
GCNT3	34.869	0.6953	101.84	88.9065	56.1651	23.4663	30.1888	11.1488	422.165	213.674	72.8104	22.2412	62.7578	12.5812	202.92	14.9943	135.237	13.839	111.909	10.2046	90.8098	57.286	12.766	32.0642	26.2191	20.577	86.7452	94.8346	42.072	126.713	62.361	175.175	517.725	406.429	127.806	177.168	69.0842	85.7559	76.6324	142.189	133.134	7.235	151.937	22.3727	61.8374	170.444	287.47	141.632	216.884
GCNT4	14.9453	5.0845	5.8125	3.8169	2.0501	5.4167	16.147	1.3532	1.9609	7.1214	1.5573	2.7199	1.8052	1.8892	1.4631	4.7232	25.76	3.3173	1.5104	4.6579	5.9248	2.8258	1.5008	1.9347	3.5846	1.7877	1.6279	3.329	0.2016	18.1392	1.9642	2.489	1.0344	6.761	6.1735	2.7905	0.7797	2.8309	1.6052	4.4276	5.5792	3.5519	7.4761	0.7548	19.9368	3.1418	3.9548	4.4318	4.8451
GCNT7	0.2005	0.1195	0.4272	0.2492	0.7817	0.2686	0.1824	0.232	0.0396	0.1576	0.2707	0.2753	0.5855	0.1184	0.3428	0.4521	0.7537	0.5772	0.2431	0.1655	0.3728	0.1549	0.2428	0.3064	0.3785	0.078	0.195	0.078	0.2395	0.4224	0.1418	0.3856	0.3329	0.4029	0.4668	0.2525	0.2986	0.507	0.2221	0.3757	0.2313	0.7169	0.3106	0.0652	0.4561	0.3176	0.2958	0.1582	0.68
GFPT1	74.7921	28.2673	64.444	27.2339	51.9624	52.563	35.3861	48.1317	76.5231	61.6623	63.7711	79.2048	27.7879	25.525	115.293	21.1209	109.77	31.3912	41.6688	25.5873	79.0077	24.3394	50.9197	33.5829	63.0168	26.9762	21.1441	32.5413	111.962	70.7898	49.0573	50.6589	95.0211	104.996	47.3437	52.5611	75.6345	37.7967	58.3799	67.9083	44.2779	33.3498	50.0398	20.9161	60.3459	78.6707	75.6834	66.1668	62.7436
GFPT2	55.5304	5.7491	57.5584	15.0343	13.8985	53.1474	42.368	23.7515	43.3156	13.1069	14.4744	38.8537	25.8937	14.826	14.5634	2.7246	4.6845	60.2697	10.7329	17.2625	45.1959	41.8222	17.8831	87.5063	9.3135	60.3518	13.5377	15.5734	2.0731	29.8358	13.6349	37.8893	2.7969	24.663	39.1861	25.5327	18.6805	36.373	25.9109	34.6209	34.4644	93.3169	4.6589	39.0427	13.9817	32.5201	11.8268	34.4378	23.7086
GFUS	70.1563	42.8101	150.14	153.258	322.407	86.0831	67.479	213.152	107.005	289.731	229.458	175.326	171.416	224.974	286.624	32.5101	158.099	86.2019	582.631	29.4266	275.791	71.9161	184.021	71.2243	139.032	87.7898	489.317	138.998	273.755	114.15	219.423	89.7718	273.331	121.132	101.267	98.674	265.629	182.276	220.046	156.619	135.486	51.3122	231.898	166.633	108.986	133.373	203.282	48.986	211.783
GLB1	81.8107	45.0932	47.2436	34.8684	47.8719	40.6821	51.8213	77.6959	63.6329	69.6288	67.7318	57.6483	50.2364	46.1419	35.0938	92.0894	66.0787	48.4081	50.4578	22.4531	89.4976	51.0596	27.6817	64.1264	40.6486	63.3116	49.7071	65.1167	48.6204	72.7992	60.1045	44.0906	44.6696	63.6623	63.7908	83.178	65.8175	60.6348	55.1671	45.1084	70.922	60.9671	30.4311	83.2686	49.1407	75.963	98.3438	67.374	58.1955
GMDS	26.9048	6.6702	19.5308	59.573	35.7653	25.3902	23.7413	26.7464	39.1394	54.4813	44.3467	16.5276	32.9249	30.1833	117.148	9.5931	157.83	22.9908	94.2391	11.7533	43.9167	35.106	71.2447	21.8958	49.831	18.2879	58.9049	33.8893	527.191	37.8316	27.0597	43.0468	119.332	69.0759	58.6526	40.775	43.1252	36.005	86.1751	67.4782	66.3958	16.5637	73.8504	39.2566	50.9064	24.3126	82.3212	126.461	61.904
GMPPA	31.2219	23.4785	22.8431	25.2889	37.9754	30.3304	23.1665	35.909	34.3947	30.0784	29.2773	34.7074	30.5986	28.3606	39.5397	17.7429	37.9629	38.1893	32.8748	10.9156	33.0402	30.1246	32.0164	35.406	28.1145	39.3394	51.2945	23.2332	40.381	31.6798	33.0439	26.7661	32.2312	30.4738	27.7547	30.8437	30.0551	43.0719	44.167	43.0932	30.0961	28.998	27.9655	39.0475	35.2872	25.2267	36.5697	41.0772	31.737
GMPPB	15.9744	11.4868	11.6894	9.3233	11.4644	10.7537	8.7963	9.5518	11.7811	16.6686	15.7284	11.9311	11.2531	10.7513	9.0282	12.5703	22.9026	11.2161	13.228	3.7286	13.9833	13.5203	11.9256	12.517	9.2872	15.2842	13.9039	11.7863	22.0972	15.262	16.0104	9.4599	15.3544	10.4971	13.5544	14.0855	17.0177	11.8109	12.6798	10.3148	11.3651	11.7296	10.9344	8.8416	12.3654	12.2564	8.7001	14.8928	15.2439
GNE	35.5456	27.9773	46.6221	14.4722	107.035	24.8465	23.0922	17.7066	47.3009	37.1662	34.3678	45.7799	19.3762	9.1781	70.3641	26.87	40.2355	16.3995	54.5352	12.9981	112.694	18.1413	15.647	20.7234	23.116	23.1496	17.7591	18.8233	181.159	30.8585	17.6	30.301	14.4591	43.8251	37.2677	35.0039	24.8348	21.1324	48.84	22.694	24.9409	23.824	21.9629	19.7656	11.8947	28.7321	20.9574	33.2057	41.5972
GNPNAT1	19.6593	4.1687	11.6894	5.4297	12.1859	10.1367	11.3571	16.7807	27.4875	12.1857	9.5167	17.1446	10.1352	15.0787	9.9992	3.4569	24.1155	7.5869	17.3901	7.9419	18.4204	5.0035	16.993	11.7934	16.3917	8.0167	35.5294	8.7257	35.7227	12.8577	11.6015	7.794	21.5683	23.5571	13.3597	8.2218	16.9385	7.6336	8.5295	18.3688	12.8007	14.2825	13.8231	5.7226	10.431	20.4018	16.1231	17.2902	15.7499
GNRH1	3.5189	2.0282	2.0409	6.8356	6.4463	3.0375	2.8652	3.1902	0.5103	5.9017	2.629	1.9863	12.0787	2.2505	4.2787	1.4735	3.7182	6.9091	2.3565	1.1132	2.3823	3.8065	3.4795	3.9039	4.0805	2.008	6.1602	1.582	1.9615	8.0485	3.0686	4.4821	3.7287	1.1787	1.9118	5.7252	1.7467	9.5417	2.3912	3.1647	2.7069	4.124	3.8021	3.1664	3.5018	2.6261	3.8459	1.2492	4.6743
GOLGA2	58.9836	76.6519	65.7663	27.609	62.7044	57.9294	42.7461	43.1479	75.7406	61.9439	60.8746	97.4858	64.6624	24.5499	59.008	51.8536	63.7346	56.0275	50.7482	25.7394	86.2003	32.8427	41.6218	48.0715	58.7804	38.6027	66.6054	26.7981	45.2049	60.5435	59.0353	60.6859	59.0352	71.0782	48.0173	47.9057	77.8844	61.9906	58.3571	64.3587	52.4671	61.1184	34.3813	39.5204	47.8267	72.2811	39.2765	65.1552	57.3741
GOLGB1	82.4165	29.0358	53.4702	30.3967	55.5668	26.714	48.5707	55.4621	73.7676	50.753	49.2152	87.6097	56.8	27.5345	49.8462	43.2734	72.091	38.3926	40.0539	25.3264	83.6054	31.6579	28.7156	40.5748	49.3322	34.8194	35.5689	33.3708	48.3177	71.3652	60.7316	56.8868	61.4304	69.7732	52.3871	49.2917	39.2994	54.7885	49.9646	65.0606	49.4699	43.3861	37.0375	40.0479	44.4563	51.7544	47.744	78.0916	59.743
GORASP1	44.0661	19.099	27.17	19.6307	34.5353	25.1333	23.1542	25.3688	28.6457	34.1658	26.0971	29.4869	32.0046	18.5787	17.2297	34.4734	35.7744	27.4355	29.0985	12.6038	29.6788	23.664	20.9636	26.2614	30.5393	24.08	31.9991	23.7789	31.9999	47.4988	38.7838	28.7538	28.6934	34.4425	31.7583	35.3487	26.7383	42.5596	31.8364	25.7047	23.2794	29.8099	23.3176	29.506	24.1021	36.9405	47.4114	31.9893	38.0542
GOSR1	23.2283	20.3425	22.1047	9.8	17.799	15.4485	15.1512	13.8323	32.9562	14.4195	16.3511	20.8228	12.5011	12.9156	15.1139	24.6295	18.2472	10.9444	15.4029	9.0579	22.0834	12.8158	11.6046	13.2126	17.603	12.9172	21.2525	12.9549	16.6723	20.5987	14.3846	14.2794	15.9883	17.9541	15.7704	15.6825	7.0312	16.7518	14.534	16.9626	15.7954	15.1638	10.0332	13.3156	14.2674	17.4988	15.2275	18.9736	18.9144
GOSR2	14.8975	16.2606	13.2945	7.7212	11.0708	10.8034	9.9183	8.6096	15.6699	10.947	9.6027	13.401	9.3194	8.5454	13.2823	15.2488	11.3117	11.0097	9.6783	4.4129	14.7741	8.3631	7.516	9.9345	10.8016	11.3118	14.6239	11.0835	9.7374	11.6339	9.6285	9.1972	11.8802	11.9932	9.5105	8.9802	4.7233	9.5855	9.3511	14.2161	9.9007	12.3548	8.8909	11.1065	12.5065	12.2262	10.0587	9.2207	10.313
GPC1	46.1817	28.3644	42.1147	31.0446	82.8995	66.6022	41.1632	74.719	33.2489	71.4907	88.7626	114.589	93.8239	92.4574	46.4529	13.7849	20.3777	159.445	119.251	12.3123	113.202	55.4235	43.7032	54.9705	73.1233	51.7255	57.4634	29.4329	6.1844	96.8135	127.97	77.5686	30.797	38.0747	82.259	71.8401	80.9747	99.7262	111.002	61.6766	75.574	77.3127	28.446	171.477	79.938	76.0005	54.538	52.3402	66.4544
GPC2	1.1504	1.5433	0.5936	0.7745	1.3216	2.5762	0.9529	1.1858	0.1493	1.1192	0.6407	0.8144	1.1106	0.589	0.8299	2.5706	0.5369	3.3674	1.8118	0.1558	1.5271	1.1041	1.061	1.282	1.047	0.6854	0.944	0.1399	2.8084	1.3308	2.0398	1.134	1.1897	0.9031	0.8789	0.8491	1.0172	0.75	0.8603	1.5358	0.8244	1.2693	0.6683	0.5963	2.1465	1.9704	0.9548	0.4254	1.5317
GPC3	73.9457	50.8309	62.7194	16.6066	7.8974	58.6802	40.7292	21.1516	13.4577	25.3462	9.6757	9.7667	3.1247	4.5541	8.6291	6.9664	10.5918	16.6671	10.3883	28.6785	25.1391	14.2883	10.2566	30.5809	5.1521	57.8749	9.2834	35.4342	16.1896	56.7156	7.7736	34.1489	6.2939	19.8258	38.5076	17.3902	14.0998	38.6521	13.4193	12.9676	20.0481	38.515	8.0932	15.7568	2.3983	19.8565	18.9344	16.6789	30.1359
GPC4	45.5496	11.1204	10.0525	21.9416	67.8618	15.1455	33.4712	52.0562	53.8767	64.3967	38.4323	36.6643	33.0133	21.2579	14.3877	7.9964	41.002	32.948	19.9298	14.9188	39.0404	20.4878	14.6757	16.5791	46.5607	26.8283	19.0398	40.3439	20.394	47.1891	61.8785	52.3996	23.5975	81.1155	40.6668	63.8427	30.4039	46.2167	33.0994	33.0218	33.7491	48.646	19.6606	34.3463	24.6639	39.2081	39.5507	33.2952	46.362
GPC5	0.7034	0.2621	0.8846	0.7285	0.0653	1.5441	0.457	0.0509	0.1159	0.7373	0.3166	0.1878	0.0721	0.0519	0.6348	0.3021	0.1072	0.1558	0.6294	0.133	0.3018	0.1132	0.1774	0.2389	0.2371	0.1216	0.0456	0.3193	0.056	1.3759	0.0207	0.3307	0.3476	0.1374	0.5186	0.1846	0.097	4.8176	0.1299	0.1318	0.9131	0.2794	2.9058	0.0381	0.3	0.2228	2.6137	0.1965	0.7455
GPC6	22.2641	18.4223	21.0294	4.5095	8.9001	16.733	13.3402	18.1652	41.9375	4.1934	5.0994	38.6792	2.6166	9.7335	9.7531	19.4641	6.3286	22.8771	5.7158	5.0651	12.1167	8.8893	5.206	38.3811	5.6645	27.5647	5.312	5.4404	0.694	12.4155	5.5873	12.7181	1.978	20.8249	12.9878	15.2782	12.8443	6.0369	8.3947	15.1762	13.7275	49.4098	2.8598	7.2945	18.3298	12.156	4.9153	13.9925	7.7471
GRIA1	0.2013	1.7839	2.042	0.0152	0.1223	0.1961	0.0927	0.0874	0.0651	0.0863	0.0222	0.0754	0.0675	0.0162	0	1.0167	0.0837	0.0851	0.0285	0.1756	0.1021	0.2121	0.0415	0.0932	0.2221	0.0926	0.0107	0.0926	0.0131	0.1817	0.0194	0.0774	0.026	0.285	0.0639	0.0778	0	0.0926	0.0122	0.0823	0.0633	0.3435	0.0981	0.0268	0.1171	0.0348	0.036	0.0541	0.0815
GXYLT1	16.1657	7.1795	14.0774	4.447	10.8603	7.6081	8.9136	7.6871	15.0072	7.1215	6.0408	9.3913	5.9426	3.8315	5.7455	16.3857	9.5908	5.712	5.7492	5.1682	9.7092	5.2494	5.7515	8.0756	7.6041	7.4785	6.9728	6.0599	6.4789	11.7193	7.1664	7.1322	6.7679	8.3718	8.128	9.0186	4.2772	13.3982	5.3119	10.1007	6.6124	9.3561	5.6214	4.5989	8.7398	12.2323	8.5935	11.3133	8.3948
GXYLT2	28.2589	3.8689	11.2511	3.7084	5.716	12.7172	17.9277	13.7354	24.4179	5.2293	4.2782	37.2566	3.782	3.8971	6.7243	3.3296	2.3517	33.49	5.4681	5.3899	13.6598	10.1575	3.7242	19.7855	4.9693	21.7118	3.628	7.3147	0.3758	9.1976	7.7855	20.5019	1.2794	14.9225	11.825	8.5448	7.7153	4.2622	8.4901	18.6944	12.4462	84.5822	1.821	6.2124	10.4467	8.0689	5.2498	6.1828	7.026
HCRT	0.2391	0.4276	0.955	0.5943	0	0	0.2796	0	0	0	0.1937	0	0.1102	0.6351	2.657	0.5775	0	0	0	0	0	0.6927	0.4342	0	2.9978	0.093	1.8135	0.465	0.6853	0.2158	0	0.3679	0.8507	0.6006	0	0.3388	0	0.6046	0.6357	0	0.1034	0	0.4273	0	0.9176	0.0757	0.7055	0.0707	0.9121
HEXA	7.9465	5.1647	6.1515	8.8302	6.2954	6.021	5.8712	5.7626	8.6624	8.5713	4.9509	8.4218	6.1222	5.228	5.0282	10.4768	4.5397	10.1181	4.7935	2.3308	7.6476	6.9074	3.45	14.1112	4.6219	7.8907	4.768	6.432	4.6011	6.3942	6.5113	9.4123	5.5556	6.9419	6.4915	7.47	4.2509	6.5709	6.8046	6.4476	6.6729	10.4288	5.2806	9.0456	7.1946	6.3474	6.9333	9.2408	6.2595
HEXB	165.077	53.4192	88.7808	90.8658	64.9438	89.0108	109.06	87.228	127.55	240.802	86.8803	113.523	58.2505	64.0967	102.528	122.062	132.9	113.528	70.969	41.8392	102.607	85.5151	47.844	180.082	81.211	117.245	112.498	96.5231	121.569	122.454	82.9642	101.047	51.8946	145.19	143.405	91.0114	96.0506	123.329	96.1598	113.915	118.362	135.752	91.659	72.9307	77.7289	110.725	118.72	117.999	96.7436
HGFAC	0.3252	1.0739	0.3598	0.0622	0.3623	0.1675	0.195	0.3474	0	0.354	0.0811	0	1.1535	0.0886	0.0428	0.0483	0.1068	0.1994	0.3379	0.031	0.1932	0.2609	0.2499	0.1784	0.2833	0.0389	0.1752	0	0	0.4969	0.3714	0.0962	0.4985	0.1006	0.4543	0.449	0.1242	0.949	0.0998	0.2812	0.6711	0.1342	0.3041	0.0488	0.192	0.0951	0.0984	0.1628	0.4454
HID1	28.3586	131.95	44.11	63.7961	62.5124	22.3016	30.4807	23.5333	23.0687	39.2894	42.061	31.1276	52.9593	58.5237	85.2752	106.351	63.8034	19.1644	52.8412	23.9664	54.2398	30.713	45.4292	15.1721	55.0242	24.8549	78.5058	45.7764	169.483	72.4692	33.6643	82.0905	202.299	25.6444	48.6973	66.1765	30.0755	80.6663	34.3443	52.1992	55.8053	13.2512	45.5991	10.5661	41.7614	32.6236	90.2847	22.8045	127.904
HM13	58.184	74.7522	46.764	52.6946	74.0015	64.2963	52.0511	74.6596	108.966	63.7521	74.6133	78.374	77.0471	81.8253	88.2669	60.6319	63.4557	61.1437	93.0327	27.5301	55.6155	62.1635	35.8236	81.2682	54.7037	74.7586	101.576	59.9773	121.63	66.5038	69.0257	52.2579	60.5534	73.8599	61.4984	53.2046	64.4327	66.8851	49.8242	64.4273	65.2974	56.4314	47.1946	125.562	53.8574	60.409	58.8956	57.265	50.0832
HMGB1	133.228	34.5614	92.4405	53.6053	143.262	87.7603	64.989	99.2676	98.0343	76.1836	96.8936	113.388	88.1311	74.3694	61.4634	58.4276	90.2412	86.398	76.3069	33.3547	136.24	80.7049	44.0026	82.3225	87.5042	97.3421	111.713	106.515	84.3573	85.0387	113.837	73.5684	68.0539	122.933	85.06	87.9225	80.1794	74.8018	70.5253	121.2	63.8903	88.181	73.294	91.175	79.5159	94.4979	105.827	71.8549	95.8677
HSD3B1	0.0565	0	0	0.0234	0	0	0.066	0.0245	0	0	0	0	0.026	0	0	0	0	0.0375	0	0	0.0242	0	0	0.0288	0	0.022	0	0	0	0	0.0299	0	0	0	0	0	0	0	0	0.4443	0	0	0	0	0	0.161	0.0555	0	0
HSD3B2	0.212	0.298	0.0323	0.4518	0.1687	0.0811	0.2125	0.1578	0	0.4572	0	0	0.0559	0	0	0	0	0.0805	0	0.0187	0	0.1755	0	0	0	0.0471	0.2121	0.0236	0	0.1641	0.0642	0.0233	0.388	0.0304	0.1693	0.7154	0	0.0383	0.0403	0	0.2359	0.0271	0.1299	0.0887	0	0.0192	0.0298	0.0179	0.077
HSPA5	1037.72	419.208	477.376	273.916	569.415	580.255	573.12	487.639	2082.54	915.453	619.415	1040.92	619.933	510.278	1370.84	373.036	461.517	465.22	489.365	234.814	1211.67	533.887	486.733	596.443	427.888	728.652	508.312	634.201	677.094	367.268	542.22	461.774	660.934	936.54	527.57	326.78	460.402	565.788	450.236	987.298	532.432	583.055	370.036	603.388	486.563	625.056	555.42	1248.46	459.083
HSPG2	144.775	62.6211	100.578	41.43	87.201	124.546	95.4676	128.163	89.5035	90.0285	81.9328	239.257	26.5145	50.08	50.5299	81.1828	90.3994	116.385	43.216	37.3394	188.378	49.0789	86.0817	149.267	111.788	68.7032	65.9743	32.4221	9.8816	179.304	84.1536	142.208	36.4227	100.654	123.922	171.429	96.5087	120.365	110.49	74.8909	122.549	133.395	28.844	17.4904	80.7612	107.645	93.4019	113.684	116.264
HTR5A	0.0281	0	0.0075	0	0	0.0565	0	0	0	0	0.0114	0	0	0	0	0	0	0.0187	0	0	0	0	0	0	0	0	0	0	0	0	0	0.0108	0	0	0	0.0133	0	0.0178	0	0	0	0	0.0101	0.0275	0.012	0	0.0277	0	0
HYOU1	137.406	47.7632	75.4167	29.6355	64.4566	52.4889	57.9737	73.9753	136.154	105.379	77.6867	114.978	40.5185	67.1421	88.9486	53.9085	58.5241	36.1423	64.3938	23.9294	94.9387	47.9535	42.4214	69.7149	59.4255	60.832	57.1884	51.2474	80.8622	67.0191	63.6007	50.3422	63.4432	126.677	61.0581	70.0837	60.8641	64.3095	59.4145	72.3652	78.807	52.4937	35.2162	49.2577	64.9778	72.1436	67.8861	99.5668	58.3236
IL15	5.193	1.1983	3.1624	2.7645	1.5608	5.853	3.6387	4.3023	4.4988	3.9406	3.8734	1.4308	6.202	2.5746	2.3209	0.8462	5.9469	2.8157	2.6662	1.393	3.5245	4.4556	1.3916	4.0417	1.8845	3.0936	1.6352	3.4069	2.8117	6.325	2.7955	2.5669	1.851	3.8102	4.7956	2.7218	2.3647	5.4922	1.6882	1.5751	3.2587	2.8962	2.5797	1.7003	3.07	3.4125	2.9718	3.1762	3.9092
INS	1490.66	27044.3	4314.64	558.841	8.7842	516.69	11.7209	206.34	25.8213	4001.35	1732.52	1062.89	162.4	286.761	716.037	0.508	6.217	517.973	309.839	260.503	592.955	5514.99	92.3229	68.449	3.4874	10847.5	1496.73	130.81	7.2337	682.122	239.849	2325.47	1309	22.5033	3017.79	499.7	70.3498	113.001	396.707	0.2364	182.973	1043.44	15888.2	5343.17	10.1339	194.597	1306.89	277.759	1791.67
KCNJ2	4.1684	5.2547	2.9317	1.2299	3.183	2.2201	2.1504	5.4327	4.8282	1.0502	1.2025	7.0479	1.3574	1.1173	0.9094	3.2271	2.6768	4.0428	1.491	1.4776	6.252	0.9032	1.8196	2.8229	1.8113	1.4437	1.3714	1.5399	5.1948	2.4345	1.0495	1.3323	0.581	2.5356	2.471	1.8463	0.8227	0.9541	1.7267	2.197	2.3335	3.14	1.1498	1.2189	2.395	1.5205	0.6327	2.664	2.2339
KDELR1	288.978	513.793	229.99	415.158	436.48	267.059	253.843	464.103	280.57	311.383	402.272	376.003	413.501	360.035	257.252	427.406	339.75	341.516	426.119	100.562	348.134	277.426	183.649	339.764	300.128	432.999	406.483	309.557	583.115	367.515	436.541	329.988	350.708	597.656	312.031	317.188	483.111	278.537	386.735	467.701	358.972	306.82	303.167	375.999	329.388	389	291.836	273.111	329.92
KDELR2	281.904	199.667	199.214	153.818	313.762	237.09	196.727	320.601	533.352	258.823	255.413	346.5	206.263	216.642	311.513	148.961	369.32	251.407	205.817	73.0626	355.033	155.825	226.777	262.27	228.533	247.499	282.975	294.969	798.024	222.144	234.111	222.473	328.074	413.137	196.555	253.663	273.17	304.592	219.703	380.102	222.178	237.014	206.334	224.385	255.351	315.571	316.752	263.542	237.509
KDELR3	75.3166	18.4119	34.9305	59.3877	64.2212	71.8579	59.3338	135.632	129.696	115.2	95.7422	129.794	71.3491	65.1311	87.6009	3.8322	177.147	118.175	37.5767	20.6423	88.6416	42.2037	188.907	78.1308	66.9699	84.1062	128.082	60.6508	189.71	68.7477	94.9814	89.1503	175.918	104.448	51.2237	50.8855	123.341	76.3147	55.2683	126.375	85.989	100.322	46.918	47.9471	77.9588	75.2517	45.6064	175.329	77.5845
KERA	0.8766	0.196	0.9338	0.7523	0.558	1.1322	2.099	1.3044	1.3744	0.3544	0.7609	5.4592	0.3465	0.2495	0.3212	0.242	0.5535	8.4025	0.2928	0.2713	4.2181	0.7257	0.8529	1.3716	1.0385	0.8526	0.5481	1.486	0.0898	0.6784	0.6309	2.0474	0.2228	2.1078	0.9622	0.769	1.15	1.0293	3.2883	2.9564	1.1108	2.2947	0.1119	0.2444	2.1364	1.6465	1.8169	1.167	1.5131
KRTCAP2	1.5552	1.9084	2.0997	3.4762	6.0435	2.1557	2.2133	1.9307	0.472	3.3267	1.5968	0.8442	6.0868	1.0729	6.5552	2.7259	2.8993	4.3728	1.9543	0.985	3.771	1.9492	3.7933	2.9295	7.6076	1.5478	4.3687	1.0975	2.0736	5.5511	2.5316	2.9217	10.1543	1.6173	2.3242	2.3063	1.6157	4.093	4.2315	7.8064	1.7371	2.6024	4.8876	1.1116	2.7919	2.8302	3.5397	1.0807	9.7286
LARGE1	10.6045	3.6491	4.4638	4.164	3.0884	5.7603	6.7779	6.539	2.4756	9.0984	3.9641	7.5322	2.7463	3.9645	2.8559	2.2908	7.5215	4.3928	3.3033	2.7195	12.1939	6.9655	3.6473	4.0572	7.6955	4.2039	4.7275	5.9226	9.8713	8.6234	6.6909	4.7331	5.1871	7.0974	6.8701	6.108	6.4284	6.1935	5.0535	4.9778	5.6673	6.4272	3.4708	2.2701	6.1208	5.8411	7.4679	3.8197	4.8217
LARGE2	7.6172	11.6675	3.4043	9.6303	3.1699	14.1314	6.5696	2.4129	2.4671	6.1948	6.8446	1.3524	13.9679	10.3894	5.0526	2.4323	4.2165	3.4317	16.1262	4.4574	8.3211	10.1474	13.1781	3.189	12.5551	7.1023	23.5016	6.9828	1.6001	12.6081	4.9446	6.1803	0.8879	3.8491	11.9562	10.5251	24.3158	8.912	17.8391	9.1045	7.5579	4.1087	9.9226	85.2771	7.9723	5.201	11.5403	17.2118	6.3749
LFNG	29.4008	9.166	27.3146	45.8686	57.0183	56.9502	66.8483	83.6009	87.4871	86.9785	83.3781	192.844	57.2897	224.998	58.3229	13.8989	52.743	36.0397	170.703	21.933	153.826	33.2265	77.9379	33.6836	95.3665	35.3165	87.5357	200.114	370.626	40.2987	53.8642	165.354	56.3935	77.7157	67.2204	91.1557	44.2528	379.537	79.3877	90.8363	67.0321	36.1304	38.3093	42.4309	53.7001	145.976	114.588	50.2672	94.336
LGALS3	354.673	56.4953	214.35	608.271	1123.84	369.359	283.563	701.443	1039.75	763.6	665.685	674.033	587.491	308.159	767.975	28.8525	668.128	453.977	1072.92	135.856	882.291	405.716	376.012	634.667	1553.58	505.558	717.85	967.786	625.079	518.096	1021.54	477.736	753.226	1444.2	404.341	1018.8	1011.43	1347.18	623.04	553.08	541.334	392.215	630.875	284.756	658.264	1348.46	1246.21	567.793	657.188
LHB	0.4379	1.5666	0.2332	2.0863	5.9759	0.8798	3.5846	5.8917	0.7793	2.6853	4.1684	16.835	53.5068	13.9603	0.3744	0.9521	0.6006	2.0364	6.3706	1.423	1.0334	2.6645	1.69	1.6731	2.1257	2.8112	4.2163	1.874	0.3138	0.593	8.1275	2.3584	0.7791	1.1001	1.2235	2.1719	0.8695	4.2913	1.6011	1.2307	1.6106	0.3914	0.9393	5.0204	11.4859	6.0351	1.723	1.8137	2.5062
LIN28A	0	0	0	0	0	0.0232	0.0135	0	0.0206	0.0164	0	0.0238	0	0.0154	0	0.0168	0.0106	0	0	0	0.0149	0	0	0	0	0.0135	0	0	0	0	0	0	0	0.0349	0.0242	0	0	0.0439	0.0231	0	0	0	0	0	0.0592	0	0.0171	0	0
LMAN1	137.374	60.0995	65.6944	28.7337	54.5802	47.7281	66.0193	116.637	209.32	58.7094	37.5653	173.138	56.5297	54.9687	73.9451	44.9392	128.877	69.7167	61.9756	43.2531	108.234	39.1385	50.2799	82.738	54.9804	54.2864	71.7808	40.4923	75.5701	95.426	27.4636	59.5057	46.1825	70.2765	78.7173	53.8642	51.6071	54.5675	46.1815	61.6197	65.6948	88.1378	35.8451	33.8802	59.3829	62.1125	43.3095	142.198	59.7697
LMAN1L	0	0	0.0089	0	0	0.0225	0	0.0146	0	0.0158	0	0	0	0	0	0.0162	0	0	0	0	0	0	0	0	0	0	0.0392	0	0	0	0.0178	0	0	0	0	0	0	0.0212	0	0	0.0145	0	0	0	0	0	0	0	0.0214
LMAN2	189.512	297.299	175.901	226.296	287.945	267.132	206.865	363.317	249.679	403.751	349.805	268.628	357.353	389.108	334.538	238.517	260.55	241.097	296.958	96.4079	273.604	305.955	198.783	332.324	285.401	245.935	420.658	232.237	378.112	289.923	406.632	268.644	365.47	239.086	270.748	390.219	299.182	405.037	292.944	236.612	288	210.457	183.682	315.988	238.225	291.163	324.097	299.099	267.565
LMAN2L	61.0785	36.7513	38.5799	26.1582	51.5337	29.9755	36.7389	40.8174	112.852	42.9209	32.3611	51.0714	28.3382	25.8825	21.3312	31.3916	29.8147	25.8776	39.7104	14.892	34.1053	25.7012	15.1432	25.5504	24.099	37.066	27.1282	30.6462	23.757	45.421	47.4962	25.8949	11.7233	43.5944	31.762	40.9364	24.1127	51.4441	27.9258	45.2219	32.9831	29.3343	29.3818	30.7534	31.6412	46.9453	51.1884	31.1976	33.3841
LRAT	2.2884	18.223	1.6674	0.766	4.1501	3.2122	0.8777	0.8422	2.8996	0.6735	1.7203	1.6338	0.3123	0.8106	5.2118	20.7853	4.6146	0.1824	0.2853	0.4249	1.029	1.1457	2.6349	0.9979	0.6369	0.584	0.8226	0.9686	0.0262	4.0825	0.0194	2.0634	0.3387	2.9709	1.2915	0.5534	0.0727	0.5671	0.7545	0.7409	0.9743	0.6218	0.949	1.5004	3.6227	0.4988	0.4592	1.7277	0.4657
LRPAP1	31.2226	138.039	39.7855	29.599	34.3002	41.6484	29.6191	45.2397	27.4105	48.0175	61.0565	45.5132	23.7917	46.443	30.8003	161.137	40.2906	44.2908	35.6648	19.2497	36.0503	44.5075	25.1773	80.0766	27.7765	44.4519	49.4158	25.8245	36.5036	42.086	36.0416	47.1936	31.5176	24.4589	41.4001	51.5198	43.7621	56.0933	43.49	23.0717	39.8198	43.7642	25.9933	74.2886	33.7817	51.0961	42.476	44.3796	46.5613
LUM	3098.54	391.448	1642.8	660.221	702.424	2663.47	2129.65	1332.81	2994.53	700.402	748.723	3444.01	464.672	374.164	618.753	274.667	654.394	4192.15	596.162	902.909	2667.77	1295.8	749.856	2813.75	1042.64	3399.72	598.289	1322.53	54.7413	1275.24	1023	2903.33	315.776	2441.41	1268.46	1852.68	1325.51	1042.08	1771.14	3099.86	1694.27	7969.58	183.765	745.887	1195.6	2316.5	887.587	1617.15	1410.35
MACO1	41.2717	28.6953	36.154	26.5414	24.0403	33.4098	30.5801	25.2618	32.9047	34.0619	33.0694	45.1947	20.2684	25.8949	36.6627	28.8926	40.6606	29.5708	25.6489	22.3806	35.6998	32.2839	18.0384	30.0753	26.2656	30.5092	19.0966	36.8066	37.9638	41.3777	34.3771	35.0197	34.3069	40.1309	32.4728	37.3189	25.2787	27.7477	29.7057	33.9839	34.006	28.3381	27.1923	21.9524	28.2989	38.178	33.5545	36.6548	28.3943
MAGT1	94.6386	43.0634	60.0885	29.0691	126.685	56.6532	53.1798	92.3628	123.917	64.8521	61.2686	105.015	43.5199	57.9774	75.464	43.8871	72.8398	43.6861	42.6562	29.4213	98.0008	40.4715	34.9104	60.138	41.7751	56.322	69.651	61.2761	56.3857	73.9421	60.1578	61.0433	51.5313	117.525	70.3962	57.5338	55.6116	55.5669	56.1336	52.5584	65.8745	54.8873	50.4946	36.11	55.8132	86.3923	67.0993	86.5774	57.9878
MAN1A1	206.968	109.835	205.479	30.3274	33.4554	76.0705	92.5038	84.2648	63.5658	81.9872	32.8028	137.969	17.1364	32.7412	42.9845	243.686	105.782	73.7224	33.4638	68.0852	86.0562	50.2748	28.4821	78.084	48.1815	75.3356	32.6272	56.4461	51.7941	128.983	35.0725	62.2311	14.174	61.9168	120.489	55.8467	66.0149	49.3577	38.0828	48.9194	83.0953	157.233	51.1434	19.4187	82.372	65.4146	50.5234	78.4778	62.7382
MAN1A2	43.807	9.5842	27.1784	8.8083	13.1379	19.7053	22.2817	19.3591	24.1926	18.8999	17.6633	34.6089	8.5202	11.7452	8.686	11.3684	27.3702	15.0248	11.9881	15.4828	35.7621	11.2624	11.7785	17.0677	16.2426	12.4856	27.0697	14.5558	16.3318	27.3249	17.9105	13.5196	14.4154	27.6808	22.9246	18.0365	17.2895	14.3621	11.3734	21.2066	18.4364	23.4878	10.7793	8.8617	17.472	20.8138	17.2711	22.3271	22.9662
MAN1B1	42.6638	59.6558	31.6444	24.3475	38.263	43.7945	29.3325	39.3997	51.0633	41.0508	45.2654	76.179	34.7664	29.4192	27.4256	50.4215	30.518	45.6025	47.1237	12.9791	53.2535	43.2017	21.0864	45.5153	30.2307	47.4499	37.5161	39.5304	32.3994	48.828	48.6886	43.4309	21.8389	35.3109	37.5088	39.3903	41.4188	54.6949	43.5814	38.6318	53.5731	51.801	24.2254	56.0885	37.7571	39.4587	29.3553	41.682	42.8672
MAN1C1	20.7311	18.2471	29.4707	5.8819	3.473	18.4948	12.0571	6.4669	4.3789	11.1951	5.8065	13.3977	2.3395	1.7932	3.0051	10.5145	6.3445	11.8379	2.5727	5.6378	19.3509	10.5566	4.9058	13.2895	9.2544	19.8771	5.2794	6.6948	0.5915	10.3484	6.9452	15.8907	3.562	7.7399	10.9312	6.598	4.6426	14.4159	5.9737	6.9925	9.1058	30.6063	5.2342	7.0978	5.3447	9.6111	10.1696	7.3425	11.0692
MAN2A1	41.0499	13.7623	27.5789	8.537	16.8947	18.7657	20.083	24.8386	24.4624	22.9149	16.1403	32.2603	10.8202	10.835	20.8014	14.8127	30.0808	19.5761	18.8409	13.0763	29.3406	11.7181	11.3652	21.2089	22.0266	14.3083	21.7056	15.1163	13.3124	34.3631	15.4778	15.9795	15.1266	35.4009	22.9078	16.5608	22.9492	17.0213	17.0047	19.4118	23.218	24.3207	11.971	4.8186	22.8002	30.5678	19.0521	36.8295	18.1376
MAN2A2	27.5093	16.3452	26.4031	10.3079	15.8576	14.4586	13.394	9.3023	7.0657	19.4005	11.3831	12.8519	13.8697	8.5143	10.8352	33.3536	16.8601	12.8872	7.0252	9.4887	20.6122	8.9246	10.54	16.1658	11.0705	7.5529	20.3809	7.5197	15.432	32.4521	13.5462	16.6586	27.7781	19.252	16.3434	15.7703	12.2943	20.9473	15.7981	16.1059	16.5311	15.9192	12.7595	3.5498	10.6899	19.405	15.8227	20.5317	33.1807
MAN2B1	61.2834	12.5688	38.6291	46.8642	56.1161	54.6143	67.0056	59.6554	40.6104	49.423	39.0722	77.0581	36.6182	44.4037	28.3966	23.6125	34.4871	53.5942	39.9289	18.3107	58.3282	64.2733	28.2968	99.0501	42.4355	62.9749	56.1235	47.7438	23.9148	63.2665	40.7118	56.7559	39.3854	52.85	54.3801	71.6068	31.0884	68.7751	49.8932	46.5733	56.366	68.1543	26.4472	49.8262	55.809	53.7948	47.0881	69.9834	59.1861
MAN2C1	20.9393	15.0291	22.0639	17.3246	28.6311	20.716	14.8977	16.3315	6.7893	19.0691	13.9256	16.1703	30.6371	16.6146	20.4997	61.7517	18.4418	29.5179	12.3874	6.9763	23.8526	14.7537	13.4816	21.9651	15.876	15.4344	20.2909	10.7108	18.8098	33.5101	18.3351	27.5958	27.9267	27.7634	22.1134	20.4382	15.6769	34.2475	23.8492	22.7916	17.0674	18.703	16.8529	9.0941	18.2668	18.9726	23.5856	10.3721	53.9826
MANEA	18.3923	4.7779	13.675	3.2923	7.0319	9.2916	8.6506	7.89	15.9245	5.6416	4.9737	20.0707	2.549	4.0835	10.6115	6.626	14.663	6.6035	8.0093	7.3783	19.1589	4.0507	5.3701	8.6924	6.9775	5.191	12.7021	5.0563	6.2668	13.8458	4.8342	5.8482	2.0334	13.2736	10.3036	7.6958	7.6123	12.7371	9.1698	9.9198	7.1417	11.4866	6.4234	2.3469	8.5128	10.972	6.6666	15.5764	7.7577
MAPK1	114.837	33.2134	81.6103	34.9968	85.3253	87.5377	65.8989	67.7246	84.121	67.5405	63.5239	111.509	33.7827	47.0997	65.8843	35.3128	80.143	54.9912	51.0001	34.2961	85.4522	46.8052	39.8853	64.0038	73.8592	39.0151	73.641	54.2388	51.3099	83.3626	49.223	59.2719	57.093	84.3022	70.5611	89.0302	42.1309	56.343	59.2574	59.2779	61.754	78.9105	49.9221	40.6775	61.0393	74.066	55.6001	82.4887	67.7158
MAPK3	73.5767	53.1273	78.3974	107.317	104.914	96.6371	63.4554	128.953	100.988	112.983	135.52	125.411	71.2126	78.3888	174.502	51.3875	84.0667	71.5813	104.154	25.0162	119.455	91.1348	46.6358	82.2977	83.1427	89.636	94.49	120.393	195.807	96.4685	98.3679	81.0769	147.832	160.24	69.0149	184.815	126.286	105.37	127.888	110.397	82.4781	57.3314	98.3218	63.6632	119.088	142.281	218.689	98.3229	118.655
MARCHF6	52.689	53.4413	56.2077	25.9037	72.4301	35.0911	33.0224	42.9476	47.7534	40.1557	35.4433	55.5794	37.2678	19.2479	40.3778	61.0762	49.9505	31.8678	33.7498	21.0065	58.6811	23.8104	23.0503	30.3343	45.9511	23.5221	34.3004	26.5442	34.4581	58.6252	40.5331	33.2252	41.1845	53.5435	39.1052	36.3749	38.2132	35.0717	35.0174	38.139	32.6952	35.4008	31.4569	26.7542	33.6574	37.5271	40.7388	35.4052	40.3562
MCFD2	109.864	41.0678	66.1884	25.3229	81.2159	80.8302	59.3699	104.541	107.72	45.8264	55.0464	122.204	31.2018	57.8591	35.8438	37.069	57.1376	44.6619	61.2482	36.8782	70.2736	41.6497	27.0043	66.3319	53.4791	53.4959	58.1008	59.518	25.7881	71.031	51.1001	53.447	45.0626	96.1325	68.0406	59.5204	56.4062	41.0514	38.9201	63.6778	69.4203	76.9533	38.078	58.7556	56.2265	90.5752	67.4997	79.9687	44.9515
MGAT1	57.9828	57.2646	55.9676	41.3434	41.2727	64.3033	47.6104	64.7922	57.4852	51.6046	46.2482	69.6866	35.8196	49.8904	63.7808	52.5851	37.1818	86.7759	37.7076	25.4346	61.0711	69.2725	35.5664	135.731	42.6338	68.6071	45.2271	46.0117	50.6551	63.326	55.699	69.334	41.8203	51.6224	58.1855	72.2452	52.0604	69.5316	53.7319	44.7453	67.0834	93.6193	23.8708	61.3607	63.6038	67.6462	52.833	80.3181	61.4462
MGAT2	0.0257	0.2529	0.4518	0.1065	0.7446	0.241	0.1603	0.357	0.0915	0.3153	0.2291	0.2118	0.2845	0.3642	0.6593	0.2732	0.2664	0.2732	0.9616	0.0318	0.5074	0.2383	0.2801	0.7072	0.4991	0.02	1.2	0.02	0.2211	0.1393	0.409	0.2176	0.5123	0	0.2155	0.3886	0.8422	0.0975	0.5127	0.3468	0.2002	0.7353	0.0735	0.1254	0.592	0.4724	0.4299	0.1521	0.3923
MGAT3	13.8085	2.9729	30.6183	8.7661	11.9449	35.7942	24.8456	11.1585	5.7955	35.0899	51.521	55.8465	8.7674	11.3839	14.9935	3.3962	14.7945	13.1385	8.5795	6.165	41.111	12.5241	19.2793	7.2467	57.3504	16.6871	21.7883	59.5058	8.7265	11.1438	25.3977	9.322	18.3403	14.2587	5.7589	25.5832	12.9278	22.7328	32.092	9.4023	24.5284	6.5814	12.6334	3.9524	24.4915	19.1374	17.9537	19.0261	20.8348
MGAT4A	36.9406	15.594	37.2007	11.28	20.0374	14.1794	19.3625	12.1151	15.7274	17.0565	10.7271	18.4657	5.5246	10.8196	4.614	11.7232	10.9257	12.4484	8.0699	13.9333	29.6796	14.1191	6.6686	23.1681	7.9216	14.6533	11.0599	22.4219	15.461	25.655	14.8786	13.2327	4.9972	26.4896	24.8982	12.0157	8.9319	15.5758	10.6011	9.6879	13.3236	28.0034	14.3095	8.9671	21.5394	31.6069	19.9457	20.8066	16.6588
MGAT4B	81.8867	43.9371	73.1303	87.2965	154.686	74.2921	55.7647	158.705	64.7938	144.696	117.808	146.587	122.529	165.423	113.038	36.1912	89.6446	68.6236	150.447	19.6089	125.3	70.6116	71.6006	65.9732	153.21	77.6055	121.934	80.8939	145.744	120.664	216.662	73.0715	176.529	98.2391	79.8528	165.091	170.586	121.618	143.246	130.463	142.705	57.8801	66.6724	73.2221	143.227	151.341	147.03	183.196	122.997
MGAT4C	0.154	0.4666	0.9342	0.0309	0.0055	0.3727	0.091	0.0216	0.0825	0.1336	0.0845	0.1262	0.016	0.022	0.034	0.7538	0.053	0.0165	0.0077	0.0661	0.0597	0.1094	0.0158	0.0152	0.0724	0.23	0.0348	0.0213	0	0.1525	0.0079	0.065	0.0106	0.0175	0.0972	0.0141	0.0148	0.022	0.0132	0	0.0344	0.1865	0.1314	0.0412	0.0254	0.0173	0.0513	0.0456	0.0537
MGAT4D	0	0	0.0197	0	0	0	0	0	0	0	0	0	0	0	0	0	0	0	0	0.0076	0	0	0	0	0	0	0	0	0	0	0	0	0	0	0	0	0	0	0	0	0	0	0	0	0	0.0078	0	0.0073	0
MGAT5	53.9493	19.6209	33.3953	15.1589	27.2705	41.3478	35.8253	28.9192	32.3212	46.8267	21.6037	54.733	12.3286	19.1695	44.7776	14.7434	47.4509	29.5873	33.4429	16.7499	47.863	49.0379	14.1839	27.5227	61.5662	19.5995	30.4157	33.6565	81.9867	37.156	36.9871	28.8532	19.2366	57.8248	31.9564	33.3551	43.6293	31.2425	74.6978	50.564	43.5547	34.6055	19.0623	28.9218	54.018	40.9753	38.6464	37.3538	41.3822
MGAT5B	2.2926	6.2662	1.2667	0.4172	1.3008	2.3246	0.8185	0.4464	0.1398	0.2628	1.163	0.9414	0.3557	0.4269	0.1832	0.4141	0.2025	0.9964	0.2783	0.2056	0.7906	1.2416	0.4572	0.6876	0.3467	0.6502	0.1625	0.7169	0.0461	1.1413	0.3295	0.4203	0.0762	1.0765	0.9429	0.1619	0.0425	0.1626	0.9543	0.0723	0.4357	1.4172	0.2758	0.5435	0.7219	0.2376	0.3161	0.1775	0.3815
MIA2	33.7231	26.122	26.1531	17.2109	37.1806	13.9901	22.2697	28.5503	29.3109	33.1905	16.7267	25.7162	22.1906	17.3105	38.6502	27.3311	43.8201	10.0428	22.6521	13.9061	35.5775	14.4263	15.3977	13.5286	17.4877	17.3341	29.5806	18.3621	25.4115	36.9047	31.2053	17.2245	24.6662	38.6282	27.3544	15.2088	22.187	28.6481	22.2307	20.7026	21.7249	13.8579	19.6719	9.2715	26.0687	37.893	34.465	21.8698	31.8446
MIA3	37.2125	14.5845	27.558	14.2995	23.5453	18.3763	22.487	18.4877	40.927	32.7476	21.1941	34.1301	14.9878	15.4811	44.4899	16.4005	28.27	18.5711	24.7367	15.8781	43.1009	15.1686	27.8399	21.6726	46.7872	17.2444	20.1332	18.8979	81.0545	32.9654	17.7413	23.6288	24.5114	38.178	23.7301	25.1323	32.4049	23.3763	37.0857	24.448	20.9242	23.2272	14.1463	8.4425	19.9635	25.9419	24.6249	38.3451	28.4447
MLEC	177.602	100.499	91.3255	38.4	80.186	79.209	80.4023	91.6696	77.4321	80.6198	62.7562	83.93	46.1558	51.4093	46.8025	78.3951	168.427	60.8067	60.4035	37.4519	90.2242	72.7348	61.9594	69.5059	96.6117	87.812	66.9651	81.4403	183.055	102.603	113.437	47.6809	97.241	93.0646	80.7431	73.6782	57.7186	40.178	108.349	80.2092	77.9971	85.2736	79.8791	64.1067	111.283	89.0141	65.8505	89.4072	104.436
MOGS	70.068	64.4214	51.6492	60.9422	97.1554	56.7076	48.8628	92.5233	52.057	81.2416	50.9787	66.1347	72.795	56.3388	53.1415	54.0938	66.786	67.1937	85.3672	22.2624	77.2208	58.1679	67.943	64.7017	62.9913	69.6749	45.6367	43.1391	92.1571	87.3935	89.9654	61.3985	79.4764	81.1212	61.5379	100.226	70.3242	86.0666	64.9359	72.6031	65.2991	60.2393	54.2966	79.2179	84.142	88.6856	94.3241	82.8581	76.9492
MPDU1	55.701	25.8176	34.9714	44.7451	48.8786	47.0052	33.2417	47.2385	69.0207	44.8737	50.6432	47.6651	52.6412	54.0591	48.7139	54.6535	78.4922	43.8967	39.5597	18.4776	44.9211	66.4759	46.1449	50.9404	63.9733	59.9151	42.3751	57.7924	86.6602	58.0682	36.6851	43.2084	77.1792	62.9231	56.0253	35.7866	41.7278	42.3593	40.1354	50.4806	49.1282	40.0068	52.7781	58.1926	55.0038	40.581	31.9415	56.7473	66.6818
MPI	14.9779	7.9668	11.8087	11.3729	13.1351	11.2911	10.2805	12.4542	15.6818	14.7884	13.068	12.6367	10.9083	10.69	9.2243	17.1343	12.5441	9.8795	10.2892	5.4619	15.1452	11.0011	7.2621	10.4284	7.98	13.3844	9.8735	16.324	8.2655	13.4268	15.5148	9.5093	13.0733	15.2336	12.6139	10.7376	8.3762	13.4605	10.1584	12.6411	12.8041	11.2923	13.1399	10.172	11.4749	9.9905	12.9191	13.4277	13.095
MT3	0.2465	1.3593	1.444	0.2042	0.2288	0.9354	0.2242	0.5348	0.5848	0.6588	0.1331	1.2972	0.0758	0.3638	0.4214	0.3572	0.1002	0.1092	0.2134	0.3051	0.6345	0.3333	0.0746	0.0837	0.3656	0.3516	0.1918	0.2877	0.1766	1.3352	0	0.1264	0.1169	0.1238	0.2295	0.1552	0.0816	0.1039	0.1092	0	0	0.257	0.2643	0.8417	0.3154	0.0781	0.5657	1.3854	0.7837
MTTP	0.0511	0.16	0.0681	0.0847	0.0285	0.0171	0.0398	0.3882	0.0606	0.0362	0.0828	0	0.0236	0.0339	0.2403	0.1605	2.1653	0.017	0.0266	0.522	0.1645	0.1629	0.0348	0	1.044	0.0199	0.0447	0.0994	0.3297	0.0692	0.2981	0.0197	0.3365	0.0642	0	0.0724	0.3171	0.0323	0	0.0287	0.1437	3.1065	0.0914	0.0125	139.829	0.7206	0.088	0.0907	0.0975
MUC1	128.54	1.8177	290.7	743.835	442.736	90.5213	169.786	485.955	465.53	1234.75	813.127	266.424	568.323	546.295	1023.55	10.1728	511.116	132.22	445.058	54.9808	631.786	190.427	422.973	238.504	866.788	160.809	275.899	381.029	42.8386	741.696	1008.52	251.827	1838.53	474.107	395.87	642.491	1101.43	987.693	1003.18	966.721	440.787	19.7352	662.063	149.441	157.422	229.993	866.832	345.544	718.947
MUC12	0.2376	0.3637	0.0986	0.2936	0.1121	0.7982	0.2134	0.2586	0.7787	1.1129	0.336	0.2488	0.7389	0.271	0.296	0.1517	0.1718	0.3263	0.1799	0.0274	0.6945	0.3173	0.1572	0.2461	0.4495	0.2005	0.3383	0.2412	6.7869	0.6107	0.7943	0.2044	0.3209	0.8739	0.1687	0.3461	0.0919	0.2698	0.1499	0.6246	0.2509	0.1296	0.5844	0.2121	1.044	0.7552	0.796	0.5527	0.5428
MUC13	92.8419	177.139	281.832	200.138	70.6622	46.8642	50.6337	63.768	70.3938	379.257	296.137	45.8465	48.1699	21.7494	1158.82	44.1701	321.29	26.4514	134.019	43.2395	388.413	27.94	341.005	47.6366	242.458	49.9251	31.1712	44.5705	1066.35	138.065	31.1072	312.403	578	692.208	71.2665	77.1861	331.808	551.925	286.39	230.059	219.983	10.2896	208.086	1.5963	516.511	304.644	370.815	148.888	256.01
MUC15	11.1907	0.1032	0.1536	0.8603	1.1138	0.0773	6.5656	0.6676	0.2053	7.2013	1.9938	0.2376	0.922	2.6222	1.2822	0.0557	0.0586	1.6861	0.3397	16.543	0.396	2.2731	1.3619	0.5485	0.0933	0.3441	0.6508	5.3112	0	8.6105	0.102	1.0799	0	1.7196	5.2918	1.8528	0.2482	0.3161	1.0481	0.0865	5.1084	0.825	5.2381	0.5628	0.082	3.0581	1.3428	1.8203	4.0105
MUC16	3.8962	0.0014	2.3929	2.6611	65.8905	9.0148	6.1608	0.0082	13.3657	6.7426	45.7241	0.4667	19.0256	0.2257	0.3875	0.0882	0.1621	0.2321	12.0871	0.0857	3.4219	0.2079	0.04	3.6345	5.7721	11.92	2.4756	6.9056	0	4.4156	35.9448	5.9661	0.0134	28.3802	2.9194	17.3246	14.819	0.0438	13.1302	0.8633	1.2596	0.3981	0.27	17.305	0.8121	7.8362	3.1762	6.7707	17.4696
MUC17	0.0751	0.0042	1.6651	6.9309	0.068	0.7482	1.3357	4.918	0.9524	36.1753	0.0913	19.3545	1.4891	2.0701	18.5489	0	22.6578	4.2161	12.292	0.1453	50.6513	0.0326	0.0298	3.166	2.7419	0.1351	12.9727	0.61	18.8193	15.825	2.2502	7.5082	126.187	138.815	0.0393	5.7738	1.5751	0.3324	0.9299	15.6728	26.0757	1.1748	27.6533	0.0046	52.1478	35.9098	28.7982	62.7556	8.6387
MUC19	0.0211	0.0209	0.1146	0.0039	0	0	0.0109	0.0041	0.025	0.0088	0	0	0.0086	0.0041	0.004	0.0316	0.2652	0.0093	0	0	0.004	0.019	0.0212	0.0095	0.0151	0.0018	0.0027	0	0	0.0634	0.0025	0.0018	0	0.0047	0.0196	0.011	0	0.0296	0	0.0053	0.0101	0.0042	0.0033	0.0046	0.002	0.0015	0.0069	0.0055	0.0119
MUC2	0.0599	0	0.0261	0.4466	0.1092	0.0511	0.1061	0.0142	0.168	0.0462	15.8134	0	0.467	0.217	0.0559	0.0105	11.9094	0.0145	62.345	0.1011	0.014	0.0568	26.5811	1.0707	3.0615	0.6864	0	0.0085	4520.07	0.1082	0.1617	3.4937	0.1976	14.8603	0.213	4.8969	1.0162	0.3787	0.0869	0.0612	0.0942	0.4672	0.0195	1.8754	10.2455	0.2484	0.0428	0.0515	1.6066
MUC20	19.3789	2.6164	34.1888	17.5362	23.3633	12.323	12.9447	14.0714	13.9435	61.6303	30.3028	14.4739	33.285	6.0388	34.3772	0.8578	20.9209	5.053	14.2144	2.7286	16.1105	25.7218	9.4903	9.9593	21.8232	15.3224	10.5134	37.708	5.6826	49.4918	36.162	15.2817	27.4469	25.0179	26.5228	34.0126	43.3439	29.4783	33.5034	33.0918	23.8066	2.5879	24.3656	32.3531	11.2636	10.7451	46.0716	5.5987	38.0151
MUC21	0.0182	0	0.2034	0.5725	1.8433	0.0244	0.3969	0.2052	0.151	0.0858	0.2799	0.025	0.0838	0.161	0.2176	0	0.0665	0.0242	18.5928	0	0.0624	0.4004	0.3633	0.3335	0.3384	7.6405	0.1061	5.2491	0	0.4597	13.4031	0.4197	0.0129	0.1462	0.0254	0.8933	18.2686	0.9427	0.8461	0.0409	0.0629	0.1625	0.26	0.0532	0.0155	0.023	0.0358	0.0108	0.0694
MUC3A	19.2642	12.8068	31.6037	37.4847	48.4013	7.3445	5.5109	6.8819	4.294	69.8105	14.6206	4.1465	18.5684	5.5685	63.55	2.6141	281.497	4.8086	16.9237	2.0753	46.7016	7.4423	18.3781	8.9903	10.0864	3.4943	12.9541	9.7715	59.0592	146.878	22.1318	22.9322	328.597	68.041	52.7929	24.6253	3.1484	9.9638	14.87	27.8682	27.2927	1.1685	38.657	0.4311	62.9087	10.8681	97.9771	37.9473	93.4219
MUC4	8.1206	0.0352	6.3611	3.9447	55.7283	11.7076	7.5738	3.5656	31.2706	70.3155	8.2797	14.9156	5.301	0.7874	6.0365	0.1712	4.6823	3.5659	19.8257	0.2478	2.2891	0.7681	0.7002	2.4102	2.3332	5.6601	3.094	13.4745	0.6584	28.6867	198.089	11.3997	6.1926	16.3596	3.4515	15.0578	49.9404	3.7878	11.922	16.7826	8.6601	0.6276	3.6105	54.7809	6.9546	6.0748	4.2956	1.6695	12.8733
MUC5AC	1.5377	0	0.0716	27.9644	30.9127	14.2268	3.926	1.894	38.2417	84.394	214.286	21.9158	62.0751	177.054	559.113	0.1795	340.204	0.1523	143.515	3.6579	104.996	0.7605	248.548	13.1414	679.921	61.1757	104.196	27.8324	147.225	17.7731	101.392	272.048	87.7509	108.054	27.7606	557.345	541.069	127.452	57.9421	56.6408	44.081	0.0247	2.3714	22.0382	10.3007	7.7371	119.626	0.1006	92.2579
MUC5B	61.4576	0.2123	2.9589	48.9921	125.271	48.5951	16.3202	10.4392	37.0386	15.1347	99.4032	9.9086	18.0021	10.9621	125.75	1.1288	878.248	1.7295	54.2703	12.6088	12.2779	43.888	203.932	45.0607	60.5539	22.6784	3.4841	10.0244	197.428	727.68	2.175	59.4027	70.6671	70.2786	318.859	55.6904	166.568	143.382	115.858	38.4468	124.906	0.537	20.5768	29.6201	1.4235	5.3929	64.3622	0.8996	47.4012
MUC6	193.516	0.1389	7.5099	209.93	82.1866	145.908	244.75	48.8557	0.417	78.113	109.761	2.6598	71.4491	20.1006	10.8316	128.987	2143.16	15.2692	78.6086	188.201	21.1483	17.412	472.558	21.3442	478.559	11.3657	15.2439	44.7234	0.7264	850.763	5.1146	659.86	0.2152	17.0431	178.466	59.8363	17.0244	1800	43.5779	13.1768	264.566	12.9539	353.928	0.9331	696.818	10.3637	67.3115	5.228	172.702
MUC7	0	0	0.0394	0	0	0.3632	0	0	0.0877	0.0233	0	0	0	0	0	0	1.2172	0	0	0	0.0212	0	0	0	0.0199	0	0	0	0	0.3561	0.0261	0	0.0351	0.0991	0	0	0	0	0	0.0554	0.0853	0	0	0	0	0	0	0.0438	0
MUCL1	0.0174	0.2485	0.0185	0.0288	0.0193	0	0	0.0302	0.4121	0.0328	0.0141	0	0	0.0461	0.0297	0.1846	0.1482	0	1.6965	0	0.0298	0.0604	0.0158	0.0885	0	0.0135	0.0405	0.0405	0	0.0941	0	0.0267	0	0.0175	0.2669	0	0.1207	0	0.1386	21.9076	0	0.031	37.6914	0.2711	0	0.033	0.0513	0.0206	0.0221
MVD	13.4813	22.1134	17.4995	40.1254	35.3133	34.1168	16.175	30.4348	13.2538	75.5217	65.3146	26.4196	28.936	32.8883	77.1041	17.3643	28.0774	39.5145	43.6215	7.0593	37.279	41.0951	42.4752	33.027	40.0775	24.0065	45.4768	14.1644	19.0929	35.3792	20.6867	32.7242	50.7089	19.9381	30.4767	39.3951	51.8359	47.423	55.3067	31.3627	41.6175	21.8003	24.8721	35.1811	22.936	34.4377	61.9741	30.9632	41.2649
MYO1D	101.587	55.4922	76.7509	50.2446	120.579	74.4312	58.536	90.0418	82.1897	83.5097	87.6527	202.22	44.0821	65.1566	87.8004	34.617	82.9599	86.8247	105.657	27.7634	123.181	60.5868	50.7516	55.3973	117.083	72.1313	93.4892	76.7493	142.314	118.791	65.8224	102.276	81.5955	137.943	78.9369	127.974	74.4668	100.907	112.092	115.508	100.02	101.096	42.6301	36.8691	89.8048	113.889	88.0672	114.815	101.227
MYOC	0.3606	2.0229	2.3571	0	0.0365	0.5708	0.23	0.6829	0	0	0.1062	0.135	0.2418	0	0.0561	0	3.1773	0.3049	0	0.771	0.0844	0.3039	0.0893	0.1336	7.4787	1.5049	0.0383	0.1275	0	0.3552	1.634	0.0504	0.07	0.2306	0.1832	0.0619	0	0	0	0	0.2553	0.1172	0.0703	0.1599	0.1398	0.1039	0	0	0.0417
NAGK	33.2258	17.1736	18.5103	22.4041	36.1235	27.7239	21.8592	24.7152	21.8256	22.3712	19.9644	26.1729	22.9475	14.4436	11.479	13.2063	18.6383	41.5802	16.3364	10.4363	31.1802	26.4328	15.3673	41.2837	18.8274	38.714	13.7246	27.1796	15.0451	24.4965	30.2967	24.1309	10.5101	25.8855	25.5259	27.6533	19.2784	21.5845	22.6437	24.9418	22.1587	36.3233	13.8684	29.9601	24.2146	33.6329	24.5229	21.7	26.7286
NANP	10.7546	5.0931	6.8197	4.493	6.3034	5.8786	6.3764	6.344	12.5876	5.8513	6.0237	8.5658	6.004	5.5407	4.4034	5.2924	7.1199	5.0843	6.5582	3.1319	10.2873	4.5402	3.4749	6.2824	7.8643	6.5197	11.3871	5.2777	8.1885	7.008	8.4054	5.037	6.0147	8.948	5.9033	4.2832	6.4276	5.7559	3.882	6.2795	5.807	9.0781	3.8903	4.9193	5.4298	11.5606	7.6708	11.4603	6.5506
NANS	19.8899	12.9224	16.3303	18.1374	18.7446	22.2571	14.9278	15.4069	56.6553	22.7223	37.6988	22.0659	20.5344	16.1392	26.7624	8.0418	39.8194	17.3388	32.8188	6.4499	18.8809	24.3002	24.3613	24.8531	27.837	33.2279	25.8081	20.1232	59.5245	21.8974	38.3912	24.3847	31.3666	41.9406	20.5368	22.2122	31.4097	26.7237	20.27	25.7246	22.0058	19.2038	21.3424	33.081	18.0989	32.7482	20.4586	23.3629	29.3165
NAPA	29.2612	42.4313	31.1704	26.0829	22.6717	27.0489	21.3846	23.1051	23.4848	22.5501	29.8125	24.9973	25.5975	20.942	20.4359	46.2303	27.2072	22.8529	23.8562	9.8661	25.4432	24.5288	11.1172	29.59	24.7514	32.6532	22.224	19.5233	24.2893	29.9859	25.6468	31.157	25.1984	33.0695	27.2633	22.4556	26.871	20.3388	24.0607	27.335	28.3958	23.9123	24.9351	24.8837	24.2249	31.0296	20.7938	20.7126	30.0616
NAPB	16.3138	37.7604	22.7124	7.1298	12.3895	11.861	9.5641	8.8302	7.2543	12.4314	9.0526	11.8145	8.2268	4.8194	8.134	26.5233	9.0693	9.6995	6.4905	5.1875	11.3648	7.2544	3.7574	7.9883	8.0489	7.8543	9.9963	4.4294	10.124	17.3223	7.435	9.6414	6.7242	9.7855	8.7075	6.2493	12.1401	9.3975	8.7248	8.118	6.6711	12.7446	10.6093	6.0429	8.711	11.84	14.1413	7.9683	11.5472
NAPG	28.3091	10.2422	17.1617	15.4499	48.7197	17.2565	20.2318	17.1707	23.3381	24.9018	22.1836	30.6168	19.1866	19.6266	16.1209	12.6757	31.9869	17.724	13.3362	9.5173	39.5958	14.5599	21.1346	19.1108	16.7026	17.7259	22.0208	14.2302	25.4535	26.3386	20.417	17.8586	23.2825	37.3005	22.3944	26.0906	17.2495	26.5267	22.0345	47.7228	18.9238	20.9029	15.6091	9.3676	16.6944	41.6305	31.7544	33.5507	26.7125
NAT8L	6.5372	22.6734	11.7862	1.0758	0.5202	1.739	4.2173	0.8403	0.0946	2.7827	2.9616	2.627	0.5041	1.896	0.8374	0.4622	0.0833	3.4349	0.6036	4.004	1.7397	2.5079	1.241	0.4757	0.6726	3.527	2.7513	1.3381	0.0653	5.6964	0.6764	2.6461	0.5268	0.2174	4.5504	1.4202	0.3166	1.3825	0.5451	0.3841	4.0409	3.563	6.2459	4.0781	0.6509	1.3639	2.0389	1.5229	4.8668
NCAN	0.0299	0.205	0.1274	0.0083	0.0111	0.0267	0.0155	0.0087	0.0355	0.0282	0.0565	0.0411	0.0184	0.0088	0.017	0.0289	0.0182	0	0.0207	0.0494	0.0257	0.0347	0	0.0203	0.0484	0.0233	0.0233	0.0155	0.0286	0.126	0.0106	0.023	0.0213	0	0.0278	0.0188	0.0099	0.0252	0	0.0224	0.0345	0.0178	0.0998	0.0194	0.017	0.0253	0.0294	0.1061	1.3817
NCF1	2.8779	1.1906	1.9395	4.2986	0.8505	11.9312	3.1593	1.1385	3.8093	2.6965	1.7287	1.9353	2.2386	1.0575	0.7364	1.2107	2.1124	6.8669	2.8277	1.3572	3.4272	19.7855	1.5289	9.4544	0.8394	6.5352	2.3305	4.8136	0.1122	2.2978	2.0555	4.2474	0.2926	4.4656	4.2666	3.1071	1.3216	4.6539	4.8413	2.1568	3.6764	7.1747	0.9519	3.5911	5.2435	1.7491	2.6767	6.1276	3.3862
NEU1	72.4619	52.3828	43.8907	34.5302	58.0268	57.468	44.2997	66.5106	65.8408	40.9479	29.3915	33.8049	32.4015	50.5106	27.2262	50.4301	42.7338	44.8016	17.2744	20.6678	42.4046	48.4658	23.2673	53.6681	24.3171	48.8919	21.3379	39.5618	61.1287	59.6222	41.0272	50.1132	32.1128	58.1215	47.487	68.9544	23.761	53.4188	26.2104	51.5939	35.7675	53.1459	36.447	46.0078	49.0925	30.9753	58.4701	70.4604	36.3536
NEU2	0	0	0	0	0.4705	0	0	0	0	0	0	0.0828	0	0	0	0	0	0	0	0	0	0	0	0	0	0	0	0	0	0.109	0	0	0.0429	0	0	0	0	0	0	0	0	0	0	0	0	0	0	0	0
NEU3	9.8216	4.0884	8.4555	3.9065	5.071	5.2391	6.1433	4.7565	3.1202	5.1154	3.4398	6.0138	3.9862	4.1243	3.2704	7.0786	5.2177	5.9084	4.7799	2.5631	7.2548	4.7439	3.2218	6.8789	6.6383	4.3011	6.585	4.2117	4.0301	6.4757	5.903	4.6059	3.757	11.2339	4.97	4.4088	3.6837	4.4742	6.0903	4.9884	6.1077	7.0608	3.4805	4.1709	4.4049	9.1623	4.139	7.305	6.5193
NEU4	0.1705	0.1525	2.8404	0.1156	0.0863	5.9802	0.2175	0.2018	0.0368	0.0292	0.0251	0.1703	0.5147	0.0275	0.0795	0.1648	0.1607	0.4325	0.1128	0.0864	0.1596	0.4492	2.0694	1.5005	0.0627	0.0724	0.1809	0.0241	18.4432	0.3079	0.1315	0.0835	0.1103	0.1246	0.3032	0.3954	0.4463	0.2352	0.1649	3.7644	0.1073	0.5543	0.1219	0.3479	2.9356	1.1002	0.122	0.3027	0.0789
NGLY1	16.6424	5.3194	9.7766	7.8664	10.9684	10.186	9.4544	10.4225	7.2845	11.1992	10.2137	8.6168	9.9729	6.7839	6.7616	7.8898	12.9804	9.1254	12.3358	5.7674	12.3856	12.3393	6.0334	8.0171	8.8594	10.6139	15.4428	8.72	10.5446	13.0235	14.3562	8.2218	9.6508	10.3122	10.8364	9.4907	8.4874	12.2273	8.5994	9.8449	8.9433	11.4556	8.2708	12.0125	8.856	10.601	16.559	11.2725	11.1786
NOTCH1	21.8861	12.5237	25.1476	9.6203	16.8773	31.6941	19.2958	21.5575	12.6448	18.9161	15.5138	26.2934	16.213	9.214	24.2647	14.9716	20.0483	25.8486	21.0515	12.8725	29.4239	12.3146	22.4938	22.5691	19.4736	8.7268	15.4949	6.0733	9.5617	34.638	10.21	25.317	8.9045	14.1231	25.0867	13.9328	23.4909	37.5925	21.7804	15.9896	22.7157	27.3741	8.7933	19.0328	19.7355	29.1858	14.0543	18.0011	24.8173
NOTCH2	68.5178	5.2492	19.894	10.1305	26.2148	21.1741	28.7971	28.2213	26.6265	32.5591	18.4303	44.0652	12.7237	12.3746	19.314	3.6082	23.0835	22.6035	15.6105	15.3133	47.0766	20.2588	10.3106	26.8246	14.9757	13.2082	37.1892	16.2316	4.5784	61.5514	26.6276	24.4069	18.723	41.5001	37.874	35.7005	17.0576	29.8825	15.1926	20.728	28.4658	36.0464	9.8037	9.738	15.4884	31.8374	26.4697	35.1551	29.8365
NOTCH3	68.3773	50.8533	59.0316	33.4938	121.831	81.6491	69.2511	121.178	51.596	55.9437	70.8877	123.636	112.366	44.1518	31.6013	26.3168	22.8726	116.456	29.5194	23.0514	111.957	54.183	73.9012	94.8958	56.9669	44.4833	97.5962	30.9227	6.6936	83.7812	32.3676	75.2233	25.5758	61.9098	82.5473	104.612	66.9863	93.4859	74.846	95.5185	74.2977	74.3362	20.9465	80.0413	65.5402	83.6008	42.3797	75.3708	103.942
NOTCH4	18.8135	23.7994	10.778	9.9955	8.7016	18.12	8.4668	14.4693	8.7303	9.4916	7.5488	15.0089	6.2572	6.4472	5.7466	21.3994	5.7193	20.5497	5.4039	5.0057	14.7361	7.2572	13.5438	19.1822	7.9794	8.5665	9.5538	6.1934	4.1783	17.8863	5.3203	13.0099	3.6759	7.1027	15.6173	9.0904	10.0866	9.1522	10.865	8.5426	9.6192	14.0464	5.6965	6.1026	7.1939	5.7879	5.7973	6.3674	11.7162
NPL	18.896	3.9057	12.3092	9.0057	3.8918	6.0164	9.2839	9.0974	17.4022	8.6842	5.4245	16.7124	6.4178	5.635	7.1351	3.6571	5.8567	14.7172	6.8572	5.6034	19.6775	10.2351	8.271	49.8599	6.6061	19.0722	6.6174	14.0663	8.187	7.8103	3.9551	12.7565	4.9924	16.4523	11.4461	8.2772	11.4784	9.3959	10.5061	13.1226	9.7418	30.3354	8.961	9.7256	7.237	11.613	9.2184	18.087	12.0249
NSF	45.1309	23.3552	43.7818	18.3716	35.6147	24.7336	25.6005	26.2314	35.2825	37.0635	37.2418	32.3351	20.5231	21.3798	22.8794	34.8875	36.8449	18.9133	27.2644	13.6899	34.9684	23.6215	20.8602	25.9599	24.9951	32.8868	34.7865	34.2795	27.2383	33.8908	31.8752	32.4527	33.1291	30.5888	26.7016	24.5525	17.5247	30.0749	25.3567	34.4224	28.2991	26.2242	23.2931	26.407	24.1787	30.9542	29.2785	29.3854	32.6862
NUCB1	271.849	506.671	204.87	260.591	262.255	292.756	210.568	283.094	214.762	252.898	256.64	338.281	181.462	215.388	182.689	526.782	203.737	312.115	227.606	86.7865	270.071	297.58	110.076	403.321	180.787	477.531	194.301	212.092	115.404	314.62	317.512	289.63	129.132	306.172	240.109	228.075	280.796	222.57	338.623	262.798	289.891	323.213	176.221	407.376	293.112	245.734	162.674	331.631	243.701
NUDT14	27.502	75.0778	16.0862	40.6235	54.2159	23.7705	25.9582	36.0577	8.9261	40.785	15.2808	23.6248	45.0794	21.9951	37.9768	41.6014	22.2513	24.5354	43.7647	11.6753	28.08	29.4546	21.5415	32.8611	44.5864	33.5282	70.0744	29.4376	32.8157	39	43.3695	31.3781	17.0109	31.0358	28.9662	33.1904	30.5189	40.3734	44.4134	28.57	36.6657	22.6521	35.6225	59.2518	32.5471	29.2643	39.8343	19.4245	50.5432
NUS1	35.7942	11.7942	25.1389	9.1274	14.306	19.8787	18.2854	21.2705	31.8209	17.1212	12.5122	33.2111	11.3652	14.0211	22.1552	10.3943	26.3525	18.0752	17.9622	10.7171	30.3958	14.1839	15.1614	25.2011	16.6488	15.8339	29.0185	17.1425	16.9233	26.2531	11.3169	14.6377	17.8595	27.0808	22.923	19.7535	14.9477	18.6749	15.0855	24.3794	15.8426	24.7447	15.7736	16.8377	18.3385	19.309	17.6961	28.7174	16.0219
OGA	86.4542	37.9625	61.4677	41.7151	143.307	78.4614	57.8641	62.494	49.92	70.6145	69.2969	75.2532	75.4506	28.7726	64.6857	46.6253	69.1503	76.3495	58.1404	40.3989	84.7014	65.7183	27.517	56.6174	77.7499	44.4107	45.3392	57.383	52.6426	102.423	80.9805	80.5354	66.2828	97.6614	52.6637	58.917	47.7606	57.9196	69.3906	78.5948	50.3471	64.8229	52.16	52.1495	59.7884	117.135	65.2865	47.2054	88.6986
OGN	125.075	37.7167	84.3914	2.3882	2.1024	92.8644	41.0621	25.4063	7.8369	7.6558	11.008	8.8808	1.1075	1.5497	8.1261	3.1499	35.7695	37.5895	2.9773	28.2904	21.7756	23.9809	4.7518	19.1931	18.3774	73.893	3.8845	17.9686	1.5739	37.4859	5.386	31.1382	1.3676	5.81	21.2839	2.8688	2.4527	15.0774	1.6424	6.5577	10.9277	93.9316	4.9315	8.8722	9.5417	9.4472	8.3368	2.5784	12.0231
OGT	70.8811	43.8589	55.3887	50.7178	142.477	56.207	52.8565	45.0012	22.4351	53.191	35.525	44.9583	108.032	29.8891	58.339	62.3688	71.5527	58.3196	32.268	35.968	85.5511	34.1522	26.4705	43.3856	49.23	30.6178	66.0577	22.6869	39.2369	109.358	70.1879	61.1531	52.5014	93.2011	54.4976	36.48	48.7399	42.2327	56.4189	50.7238	47.3725	58.2164	49.003	17.5217	48.8811	76.6426	57.2423	36.2297	78.8531
OMD	56.157	5.9191	46.2458	4.4103	2.7608	47.1905	23.3605	11.5872	20.1484	4.6229	4.198	31.8235	1.4284	1.1971	6.1638	2.2315	5.7857	58.8588	11.0913	16.2813	42.4147	8.5191	6.5469	17.5316	5.6961	25.9682	3.2539	14.1779	0.4037	23.1383	4.9582	48.1012	1.3629	16.5836	15.6195	3.8312	5.6477	18.0902	11.9818	19.376	15.2081	81.4613	2.5373	4.9186	6.7502	28.1417	7.2025	5.8655	8.7396
OS9	255.79	183.73	117.747	99.7562	192.713	159.76	130.64	214.393	235.421	194.342	152.154	212.368	110.618	107.986	159.5	180.352	143.427	138.44	145.266	80.186	144.607	136.784	71.1243	174.078	134.514	223.256	127.303	160.093	158.398	169.065	142.984	167.391	106.509	183.596	253.884	173.486	91.2285	135.531	153.576	157.531	131.036	149.861	94.3282	173.061	162.47	210.177	145.042	211.069	148.691
OST4	439.346	232.346	255.619	449.463	539.492	443.433	340.265	630.699	401.649	278.916	499.233	385.575	410.978	432.93	260.432	160.616	367.612	577.161	394.539	150.341	459.589	420.198	285.074	484.512	441.459	665.835	429.833	487.909	579.155	234.135	533.126	376.659	500.591	572.814	383.966	503.335	488.997	184.304	456.352	486.148	421.488	545.601	371.757	573.015	355.924	535.867	531.543	385.708	434.205
OSTC	248.825	71.4948	128.006	101.245	185.568	162.754	142.507	304.633	348.03	144.586	181.244	323.236	165.736	169.736	153.325	52.9536	200.363	236.408	152.031	79.2256	256.6	170.755	153.05	241.51	123.371	247.78	195.554	197.427	210.139	139.414	119.771	147.598	134.287	195.009	163.907	168.496	200.329	163.897	142.144	249.592	185.893	265.903	114.775	150.747	153.447	202.72	175.315	199.901	139.665
P2RX3	0.2334	1.0578	0.1906	0.5158	0.156	0.1251	0.0971	0.1351	0.6093	0.1615	0.2269	1.1752	0.1005	0.2756	0.7451	13.0675	0.0474	0.5583	0.2264	0.0867	1.6159	0.1804	0.4522	0.0634	0.0755	0.4359	0.9444	0.1695	0.6246	0.5058	0.0495	0.2275	0.6091	0.0782	0.2391	0.2793	0.5098	0.1771	0.1241	0.035	0.1616	0.3617	0.3894	0.0911	0.146	0.3648	0.2143	0.3683	0.6729
PAPSS2	123.077	96.493	117	20.0568	32.3099	41.8354	42.7857	68.7232	55.5353	72.5079	37.8514	104.6	30.7342	25.5495	23.8289	42.5697	61.0541	38.2663	23.3983	26.3169	72.6685	47.6329	21.6132	54.2299	21.5104	85.8707	33.4353	31.1899	79.5141	75.1571	40.1301	35.7002	41.7041	54.7929	61.2383	37.3577	37.514	32.0604	31.8912	33.0803	40.1713	93.2372	44.0977	21.5251	37.1743	85.575	67.3936	48.3145	63.6778
PCSK9	1.7391	2.0414	1.1192	4.3528	5.0719	1.3103	4.0861	3.7738	6.2329	11.0741	10.4978	2.7194	9.1211	2.8661	8.9207	0.14	11.1535	7.2687	24.8226	0.5233	8.4464	4.423	32.2968	3.0392	20.4201	2.6688	20.5778	2.6593	12.7405	2.3552	2.4336	9.5237	24.9768	4.8663	4.0998	16.0638	6.1385	10.9032	14.8362	10.8341	7.5876	1.4141	4.5076	2.6041	2.8225	9.2747	2.6015	6.8598	18.0013
PDIA3	458.892	230.343	320.429	392.232	245.988	351.165	261.327	416.516	816.031	671.561	555.377	444.858	617.596	532.063	466.808	480.304	484.397	364.399	245.519	128.486	614.967	322.718	303.672	385.111	300.077	360.708	381.127	412.186	442.539	273.363	468.521	356.142	523.591	498.408	322.067	387.204	371.181	302.705	355.605	576.567	409.224	330.288	370.725	491.455	381.834	394.256	720.918	431.984	473.795
PGM1	99.5742	25.5091	43.7998	56.965	81.167	59.7298	59.2285	97.3408	58.9087	72.6944	54.2294	87.7289	72.9627	103.322	43.2733	27.0048	69.8375	50.5274	52.7192	31.9157	62.5988	60.4473	35.8394	58.9461	40.1415	86.6025	56.9592	131.788	41.3675	89.9303	74.6191	52.0608	52.3001	52.4767	88.7903	75.4967	81.3524	105.2	67.4973	45.3765	74.6342	88.0063	39.7596	92.2023	64.7178	75.807	74.2986	38.6264	66.6977
PGM3	26.0924	7.2342	16.0147	7.3899	10.0793	15.1952	11.5403	14.6425	24.2929	15.8532	9.011	20.882	9.2537	9.6703	16.6694	5.2582	26.5268	16.9231	10.2932	9.0941	19.7396	10.8178	14.9248	14.8941	8.2899	15.4084	17.1793	9.9322	15.494	16.2212	7.3167	15.0362	16.7054	19.7964	17.2142	15.9101	10.777	15.1259	9.5402	16.8592	12.5073	26.7523	10.822	9.9439	12.6268	12.8572	13.3906	22.98	11.3665
PGRMC1	231.569	223.178	163.693	99.0771	239.987	217.595	159.316	200.721	318.791	283.218	159.236	202.57	210.163	165.31	200.711	253.629	206.105	132.418	139.492	77.4835	253.62	122.133	127.905	140.137	169.489	225.857	252.05	217.095	207.199	195.409	222.493	164.249	191.636	296.654	177.091	195.742	192.604	165.059	137.524	187.799	170.538	149.065	164.548	135.852	203.285	304.393	247.258	162.511	184.715
PI4KB	67.9472	50.2772	68.9601	35.1095	81.8317	56.147	43.3618	41.5975	46.6443	47.6426	41.8645	55.0548	40.6841	37.8705	63.4832	67.4763	53.8429	47.1958	32.3536	22.7223	71.1852	56.5678	39.3852	47.0871	63.3256	71.8944	66.0646	43.6819	44.5196	72.3364	52.4477	46.1675	64.9556	50.4805	52.5738	52.5457	36.0301	65.2798	62.3367	55.7642	50.4647	60.1921	52.8677	53.7766	52.7921	61.4689	61.1898	48.0412	69.7276
PKM	453.635	233.792	318.028	537.188	1162.39	457.63	338.182	747.706	747.22	671.034	1226.92	841.302	719.826	731.762	1031.76	333.967	389.568	414.906	436.011	80.0763	729.41	332.55	312.364	543.77	463.048	624.211	742.817	614.865	184.248	381.321	968.777	593.592	743.814	766.311	466.038	711.713	402.534	992.128	597.104	713.769	505.81	280.103	470.842	747.356	494.077	647.993	873.131	686.974	688.113
PLCB4	11.8517	17.2559	20.8366	9.5121	1.9804	7.5337	6.2875	4.3678	7.2928	10.0247	5.6387	5.323	3.4455	1.7166	7.3847	13.8299	12.9557	6.6456	3.3085	3.1208	16.3418	6.4722	3.0463	3.3667	11.9528	7.362	5.9312	6.5255	80.2023	8.5058	5.8587	8.7009	10.9722	30.6613	6.1597	2.5998	13.6104	8.6994	19.0821	10.9071	5.5454	7.6221	8.4024	1.6758	3.701	21.619	10.5414	1.8957	14.9454
PLOD1	134.196	49.2899	69.7701	86.8166	226.901	97.1225	78.4193	235.586	260.148	152.403	107.179	344.256	73.4059	107.377	99.887	28.4622	76.8266	194.849	79.2269	29.1852	175.626	87.3139	82.3145	169.718	75.8419	150.602	85.6374	67.1021	39.5254	96.2142	82.4289	93.6781	99.3706	103.19	99.7941	123.308	85.0353	130.061	109.521	122.221	154.815	156.848	41.9831	134.033	121.1	122.113	92.9769	183.477	93.8518
PLOD2	53.6882	6.3915	30.6378	14.1022	61.9934	43.605	28.4034	137.343	149.105	61.712	27.6635	197.167	50.1732	32.4789	54.3564	7.8274	21.689	62.7576	28.1327	21.4929	125.31	17.6083	23.6285	57.6703	25.4854	44.493	13.2142	18.9367	2.6318	26.6047	13.3161	24.0006	24.2577	48.1786	32.214	51.3567	28.2891	25.8569	28.1688	37.154	30.3224	67.4583	17.0542	13.6118	38.2632	43.7141	28.7021	46.9167	29.8881
PLOD3	60.9806	76.4452	45.9795	47.2818	128.56	75.7658	37.3754	97.3539	84.1675	71.0435	85.8454	76.8464	69.4681	60.0855	66.2961	71.1585	36.1136	69.3217	74.4875	14.2352	94.6724	55.9737	42.144	73.4917	68.5404	56.6769	72.5304	58.8135	140.245	71.5485	74.5152	46.0266	85.9409	88.3587	53.9957	104.669	76.1862	91.6392	64.2099	75.7445	66.8438	53.1377	55.281	85.2013	119.321	92.6379	73.2375	92.6844	70.1776
PMM1	15.0163	30.6411	10.8892	11.8092	8.9185	10.3946	15.4703	9.2695	6.5212	10.8079	6.9276	9.0821	4.9931	6.0509	5.0139	25.4616	13.76	14.6416	7.568	7.1587	8.8482	16.2971	5.1521	10.7274	6.7528	11.8542	4.4568	13.2546	21.2499	26.3512	10.7183	9.3702	5.358	12.2111	17.2624	10.4622	9.0852	13.7791	6.3103	7.6662	10.2448	13.3979	8.0746	14.5448	14.7163	8.2963	7.9286	10.0387	10.581
PMM2	3.8573	1.3008	4.5132	3.1511	7.2053	4.9246	3.0353	4.2185	6.8594	3.8008	4.9031	6.6232	4.2152	4.8557	4.1396	1.8418	6.3274	3.3966	4.0364	2.0465	9.3413	1.9264	3.9621	4.1509	4.5238	3.7536	6.3045	3.6831	8.9084	3.6212	4.9148	4.1769	7.5541	6.2362	4.2908	3.8317	4.9414	2.4787	3.3749	6.7025	5.4723	4.3119	2.9389	1.1987	4.1224	5.7125	5.4114	6.5261	5.756
POFUT1	60.0286	34.8653	39.1973	18.399	41.1282	27.8283	33.4996	33.9965	40.8193	31.7471	27.506	72.6793	18.9113	27.916	17.1834	33.1826	28.7244	29.5175	44.9985	16.2792	43.7748	23.9796	13.5275	29.6323	31.947	31.3291	32.5635	26.7366	53.5203	40.9893	44.274	25.4937	19.085	65.1802	33.3339	30.0856	28.5963	27.6295	30.6376	30.3763	42.8142	41.071	19.7969	25.9867	34.2788	44.8672	31.6005	39.2758	35.9375
POFUT2	20.4607	20.3196	18.2487	11.3476	42.6367	16.3583	11.5572	24.8271	13.1916	23.1427	13.5729	27.3171	15.6348	12.4612	21.1641	25.2735	17.7087	26.5594	15.6127	6.6636	21.6979	13.1182	15.0326	20.3546	17.1812	13.7877	18.6334	7.6077	12.699	27.3215	16.3092	24.6577	18.1287	18.5147	15.2205	20.8408	13.3508	23.744	19.5692	25.8187	18.1138	25.3351	11.231	10.55	18.0546	22.4552	17.8112	12.6909	30.646
POGLUT1	14.512	5.5649	10.0722	5.2283	6.3882	10.6725	9.7623	15.881	14.5216	8.7497	8.8883	14.7428	8.4719	6.365	3.4185	8.0857	8.258	11.0659	8.4621	4.4067	13.2736	10.5459	7.8111	9.6283	9.9494	8.6739	6.6471	7.8009	6.7798	11.1825	10.4881	10.6096	3.5745	12.7303	8.3519	7.8774	4.7539	8.8172	7.2871	9.4288	8.0348	11.4634	6.541	6.1566	7.2623	9.9802	8.9407	10.2252	10.5306
POGLUT2	30.3815	5.1756	16.6222	8.1953	7.828	18.5475	19.1044	19.3748	24.7311	10.9464	6.5537	41.4299	5.7177	10.772	9.0872	6.733	11.2132	37.2668	8.8666	5.8297	21.7645	13.414	8.4187	25.509	13.3286	25.1566	8.58	10.3839	4.6975	11.9422	9.3314	20.2394	6.598	21.1537	12.7453	19.1621	14.5091	13.9999	15.584	24.5618	17.8601	42.1203	4.9189	13.0211	15.1861	24.2273	13.0689	22.2211	14.5696
POGLUT3	88.2461	21.3361	42.4937	18.7945	32.1614	49.4275	41.3772	50.9197	96.9431	42.9161	38.5845	87.5823	23.12	28.3613	22.8077	11.0671	41.7809	48.695	28.8245	17.9649	64.2693	26.5969	25.0751	52.2827	23.368	47.5378	40.377	28.5499	47.428	45.8009	30.7672	38.1263	18.2008	70.12	44.8593	31.4831	32.9876	48.2323	33.8344	47.0741	34.1586	69.3654	19.3347	26.9561	34.4667	57.0577	31.8053	43.5026	39.0628
POMGNT1	44.9109	52.0967	35.5544	28.3105	36.1258	35.466	29.1648	42.2522	18.4709	38.2258	43.7584	42.9495	35.7937	29.4181	18.9216	59.8185	31.4945	38.556	28.1976	11.1537	39.0182	40.2975	25.8962	31.7458	24.631	39.9406	20.003	30.8085	54.7412	48.3953	49.3444	28.7307	34.191	30.6496	42.3461	48.249	31.5748	42.2453	44.612	33.2242	40.6881	33.6788	30.4228	57.4436	33.9352	28.0477	36.1518	25.0627	42.9591
POMGNT2	36.8999	39.7914	37.0244	16.4531	14.4403	25.5944	27.8204	32.1637	26.4699	27.8193	23.8474	38.4319	17.5258	21.5631	11.6121	63.2024	19.4089	29.9167	20.5804	13.3138	37.4934	26.2763	15.5932	25.4403	21.935	29.9984	36.1933	23.6281	10.7706	36.7885	33.7121	27.5149	15.2899	21.0694	27.2357	35.8105	19.7902	30.3652	25.8513	19.275	28.0222	39.9766	16.0077	39.0517	17.3782	27.5698	17.9067	40.0446	27.9476
POMK	14.1415	3.3387	9.9623	3.9959	8.5636	6.3855	9.0239	5.8038	10.6758	5.5565	12.7151	10.7826	5.3856	8.5216	7.6975	4.6654	9.7569	6.5838	7.2583	3.6457	11.3856	5.1086	7.493	7.6124	11.4452	4.8843	15.2454	8.2321	9.2035	9.2674	21.4323	4.9782	7.0454	9.8588	7.1081	11.3427	4.8645	8.7483	6.2279	14.7101	7.0594	7.8354	7.3868	4.6676	6.4204	11.0036	7.0502	9.9444	5.6552
POMT1	12.5096	35.3543	11.032	8.5571	8.6537	11.6356	9.0488	7.6543	5.1387	11.3215	8.3266	9.6972	8.5176	6.8573	6.5782	25.5787	10.8412	13.0023	8.5154	5.0266	9.8622	12.9107	6.8605	10.1377	7.6053	8.9999	8.4533	8.3932	10.3939	20.2185	10.5268	10.9181	10.917	8.3583	11.0357	9.617	8.5996	14.1582	10.0227	10.5865	12.1674	11.5263	9.2789	4.8902	11.2231	11.6585	8.1817	8.086	13.5312
POMT2	10.3798	27.6401	8.1716	5.9848	13.9277	6.6838	6.437	9.584	5.397	9.6945	5.8292	10.0593	6.2033	6.6099	6.0456	31.0285	6.1973	7.9669	7.0402	2.5212	14.3429	7.0694	6.0709	6.7412	7.2822	7.0363	7.8024	6.4514	7.4291	10.6905	10.0654	8.0069	3.5366	6.3578	9.436	9.6755	6.9586	9.7869	10.9503	9.8246	8.1952	7.744	6.3868	5.9245	6.2728	8.8654	7.6066	6.4473	12.307
PPP6C	67.1859	52.4245	60.3	24.8629	39.9986	54.9966	46.7979	35.7612	51.4775	43.4651	49.8753	64.1118	37.377	29.2254	44.5395	50.5805	50.8645	38.4657	49.9249	30.0841	64.3959	45.8064	31.2378	46.1349	43.0388	41.6488	50.1112	54.958	43.1887	56.762	45.9994	41.3469	40.6008	58.7299	49.315	36.1052	44.2141	44.6356	35.4162	56.6116	47.4217	51.5205	41.8233	38.1534	40.1207	63.1195	40.9832	51.7477	48.2914
PPP6R1	39.2361	50.8998	67.0873	40.8318	65.4344	54.1901	36.155	55.798	33.2721	57.0878	65.5753	62.7873	40.2065	43.6669	83.0839	78.2678	45.1699	37.9394	55.7211	14.3594	68.5859	55.1301	29.5329	47.1551	59.6586	55.138	80.5053	26.6378	36.9191	54.5405	73.768	70.4695	96.7742	56.9156	50.2914	43.1517	67.7973	44.2256	49.0557	44.8594	52.6845	42.1544	40.8275	44.1399	52.6232	71.9314	48.802	37.3553	61.825
PPP6R3	51.3318	26.2708	42.769	22.7694	37.32	35.7736	28.4284	30.3552	34.9095	39.7603	38.6374	44.4922	29.0864	26.4529	28.3291	28.0225	42.6017	27.4635	33.8196	16.5776	45.1263	24.775	21.4927	28.5395	41.2795	23.4315	53.3552	28.9426	33.6636	45.2273	40.4009	25.9597	27.8319	60.0512	34.1325	34.371	24.8491	30.7047	32.7707	35.4208	29.8111	32.4394	28.0276	25.7187	35.3691	45.1603	35.6325	32.9072	39.46
PRDX4	147.349	241.452	113.356	95.533	88.8027	132.472	156.465	172.114	160.969	132.482	133.977	148.146	104.816	257.871	131.791	312.786	213.148	149.583	108.219	217.848	166.873	137.12	97.5755	123.001	77.6366	208.537	198.521	198.172	196.494	115.477	82.4541	118.569	113.492	131.289	146.945	114.261	123.691	127.548	89.2267	124.475	165.933	147.262	90.2301	211.353	109.701	120.035	105.622	156.568	103.465
PREB	97.4013	48.1072	64.3102	45.7427	57.0503	75.0962	51.877	71.3484	60.9393	44.6872	49.3159	58.5223	61.0679	52.4055	24.3059	37.8254	58.1454	64.2202	61.7623	27.1401	66.2263	55.6468	46.778	61.9785	57.1362	91.9299	64.6551	56.1383	69.836	69.288	80.5037	52.8317	50.1095	74.5276	57.9858	71.8508	59.6883	58.4298	56.298	68.8937	62.5671	68.5211	48.8242	65.3464	58.7755	83.2554	72.0876	83.637	58.6062
PRELP	134.057	102.584	91.0526	44.9531	52.4736	190.032	63.1168	63.1463	174.468	81.7017	50.4599	167.25	16.5814	11.7092	35.6922	6.504	30.7192	151.918	33.468	33.1667	181.265	85.5896	45.065	53.2049	112.071	61.6679	33.1237	86.0286	5.278	135.809	50.3122	203.33	25.0661	163.864	103.602	262.784	43.5466	114.557	115.827	156.362	67.5395	154.322	12.814	26.4677	25.3413	168.281	82.1656	250.977	121.154
PRKCSH	153.684	296.529	118.101	135.263	284.429	169.95	145.685	208.608	129.219	174.721	184.514	189.779	180.351	187.73	188.553	215.857	127.005	176.663	263.374	59.2464	154.436	200.181	124.244	185.488	253.878	180.84	175.933	151.167	210.971	213.597	228.456	168.786	138.702	240.064	177.014	206.182	193.44	220.134	209.026	195.564	162.875	168.78	142.729	254.601	189.953	140.525	162.31	152.467	169.108
PSEN1	42.9553	17.2956	21.4571	26.807	52.2542	24.2959	27.287	40.1561	42.1037	37.4422	29.8047	54.6933	37.5528	28.7115	42.5155	15.6715	40.3372	25.574	45.8678	11.4934	59.3419	20.4683	23.895	30.6032	34.1624	26.3131	39.6194	34.5236	37.5185	42.2312	53.3222	28.4866	21.1699	64.575	29.0696	46.7501	36.1044	36.0695	30.7443	37.8519	35.3669	26.9853	25.3047	20.1336	43.8552	65.5166	55.4632	46.5316	40.6183
PSMC1	11.7371	3.9151	6.6471	4.746	12.2726	8.0339	6.448	10.4613	15.6744	6.5395	6.7734	12.4223	6.3613	7.7429	8.1392	4.2952	8.1222	6.9823	9.8693	3.3085	13.819	6.3646	4.0364	7.3492	7.9569	10.2274	13.5272	8.721	7.7262	6.1366	9.4762	9.0127	4.2126	14.214	8.6936	8.3346	7.2169	4.9233	7.4059	6.7807	8.2971	7.715	4.868	7.4333	6.8439	12.4498	9.0102	12.0182	7.8859
PTGDS	6.4851	12.1914	6.4071	5.7527	0.9632	15.1926	8.1287	1.0154	0.5431	8.901	2.3487	3.0378	4.5497	1.1711	5.3921	0.5898	1.9379	6.7579	2.7484	3.101	9.2971	37.4628	8.0598	12.4631	1.5225	12.8034	3.6507	4.8283	0.4739	6.475	5.8799	7.4155	2.6968	0.8689	6.4306	1.0331	1.7673	5.4024	2.3668	2.6874	5.5461	16.1853	3.1459	10.1488	1.0846	2.2077	3.0519	3.0697	5.4339
RAB14	141.897	66.6104	112.415	40.3931	92.7947	100.616	97.6521	71.1095	125.1	104.154	112.124	162.664	68.5483	56.1143	115.413	66.2744	106.586	75.1731	94.694	45.8021	147.844	79.0085	52.5266	86.5162	77.9858	80.2272	121.618	109.05	109.783	117.197	100.96	99.8442	101.863	141.556	108.721	80.5081	106.06	121.928	77.6924	118.175	84.681	109.504	73.1147	78.8699	79.9428	158.031	88.0468	108.68	102.501
RAB1A	229.876	80.5645	166.613	95.8894	162.454	179.661	122.988	201.719	212.985	168.213	211.387	240.644	156.539	142.874	194.784	75.2354	183.421	185.902	141.046	69.1706	247.879	128.82	141.009	191.53	164.027	171.095	127.482	162.989	195.81	150.215	162.965	142.916	179.585	218.587	149.43	181.565	184.353	111.876	160.977	186.947	165.476	205.121	124.993	140.216	179.546	269.577	233.035	237.005	183.194
RAB1B	136.138	80.3168	128.688	76.3136	143.421	116.97	89.0353	120.747	138.398	135.737	163.267	164.093	116.017	129.638	106.985	87.6647	127.234	89.9923	120.772	39.1876	124.87	111.706	63.6905	102.991	115.26	130.233	74.549	124.862	108.442	130.607	184.558	108.793	115.162	177.921	116.908	155.708	145.404	134.393	129.976	108.788	131.617	102.149	80.5739	138.8	111.174	137.406	134.432	112.38	112.954
RAD23B	167.89	76.6079	131.788	47.1499	119.404	127.448	96.6506	103.187	173.008	130.273	127.143	181.573	82.5881	74.4091	154.234	72.3091	115.908	82.4595	139.454	63.3185	157.738	71.6533	77.9726	103.524	101.182	107.102	151.127	110.088	126.527	106.533	109.968	112.694	124.23	167.278	124.279	93.8154	133.231	91.1615	92.235	142.364	101.647	117.967	98.3851	89.7313	84.7194	189.959	103.124	117.763	106.467
RAMP1	91.5205	31.8373	51.6605	159.933	74.622	136.841	125.022	195.886	59.2143	89.0047	127.336	40.7024	89.11	74.7613	75.365	15.3395	100.182	139.173	112.784	124.498	86.6394	168.863	61.3201	165.842	160.147	69.5291	62.7383	131.006	88.7757	163.303	187.174	108.347	28.0306	77.584	113.322	302.322	75.5748	138.077	144.543	92.0693	121.403	193.764	84.8725	85.8346	240.297	174.811	131.012	75.6042	145.534
RANGRF	1.9428	2.8236	0.8796	1.1268	1.4068	1.0409	0.7952	1.3491	1.3254	1.1913	1.1017	0.6002	0.8062	0.8602	1.0797	3.2854	1.4212	2.7749	1.0599	0.5111	1.2088	1.5762	1.1909	1.3361	0.7073	1.8141	1.8139	0.8692	1.3924	0.9647	0.9272	0.9342	1.4864	1.0249	1.6285	1.1012	1.2055	0.7984	0.9041	1.3105	1.261	1.6498	2.1879	1.8482	1.4915	1.7543	1.3855	1.2932	1.4208
RENBP	22.7096	9.2512	20.1355	26.3263	8.5203	26.0853	15.5501	17.343	18.4687	30.2602	12.4468	17.8569	15.5355	14.2323	12.3865	7.4232	5.8127	39.7079	15.3702	6.1314	23.7674	34.052	9.0871	106.04	13.5203	30.4911	18.3243	21.9171	1.9801	22.8151	8.9336	27.1148	6.4504	19.5695	23.4881	29.0292	19.7352	19.8534	22.667	16.5147	27.8752	45.3564	5.9506	29.4559	21.1525	23.1216	23.067	23.0258	20.9118
RFT1	12.689	8.0948	8.4615	6.8005	9.6339	7.7055	10.4907	7.004	12.3813	11.1748	10.9831	10.664	6.2337	11.2588	4.0035	11.1056	9.8532	7.0078	8.1755	5.4697	11.2023	9.9355	6.8243	9.3881	9.0231	11.0783	17.6441	9.8535	10.808	9.9105	12.1357	6.4791	6.8266	9.7906	9.5843	9.2639	7.4107	8.3247	7.3472	9.6796	10.7848	9.553	7.2817	10.7225	6.7861	8.1519	6.5254	10.4125	9.8941
RNF103	17.5016	8.5696	18.7161	13.2596	12.1916	16.9825	13.8776	11.3916	42.2404	19.0468	12.324	24.0671	20.2097	10.552	33.0779	6.5645	22.6114	9.8467	13.6562	7.1788	24.5431	14.0841	13.4927	11.8721	22.484	11.0529	8.6598	14.5011	17.0668	26.3217	13.4178	14.8205	23.8835	18.9282	18.3342	15.7186	17.51	17.1113	20.6484	19.1338	14.7606	11.7471	20.4626	7.6741	15.8116	21.6384	22.9774	20.861	25.9089
RNF139	49.3919	22.5787	45.5873	21.0054	50.7114	39.7904	31.8293	39.4219	60.808	28.6832	41.5886	58.5252	34.414	28.1228	30.9109	20.7578	29.4133	30.5644	57.0366	21.2798	59.3868	38.1793	16.9153	34.7688	31.9362	29.3839	62.0848	41.4584	20.8206	29.2451	48.1224	34.6813	32.0666	52.8612	34.1459	33.5371	26.6789	28.6869	25.4405	31.2805	40.1633	41.314	23.5541	43.8386	25.0868	60.1548	30.9886	39.4699	40.8204
RNF185	49.988	20.7882	29.853	24.1981	22.5283	27.2751	30.1591	24.2211	32.8696	28.5701	36.4769	41.6909	20.5122	20.1403	33.9634	23.4652	31.8628	32.2909	18.2499	13.2603	30.4347	27.7969	16.584	28.3689	29.1615	33.7134	26.193	29.7433	21.3031	39.5147	24.8847	25.4388	20.2151	35.1153	29.4257	28.1375	16.8	31.338	28.6158	24.6459	29.2375	34.9551	22.7984	24.9233	29.1422	34.0952	21.2302	40.7493	24.1174
RNF5	156.547	47.4541	75.4596	113.99	146.984	102.054	105.009	100.026	134.326	119.74	98.4611	106.461	100.793	138.357	184.588	45.9483	143.072	118.226	123.561	45.5693	101.674	122.493	62.0749	99.0763	90.5055	103.192	102.92	133.473	105.263	122.109	106.444	109.092	132.753	117.519	119.266	153.15	202.436	180.611	117.491	155.484	115.561	90.9156	131.012	119.781	144.492	149.644	169.274	140.386	134.34
RP9	12.5534	12.3305	11.8072	11.8744	21.3805	14.5789	12.2188	11.9356	13.4733	13.6909	10.1696	10.461	10.0372	12.5301	10.5462	13.7078	12.3414	13.9794	10.33	7.2086	14.3531	17.7449	4.909	12.531	10.7136	17.0799	13.1262	19.5353	21.4257	11.7268	16.5843	10.8024	13.2203	12.5414	9.0727	10.5224	8.6804	11.9736	9.358	18.8435	11.5857	13.8477	13.7232	16.0361	11.3576	18.3914	10.6349	7.771	13.1047
RPL10	908.719	603.552	543.722	723.766	1570.84	796.708	768.849	804.445	762.039	752.612	606.916	566.906	640.461	751.085	652.133	439.019	458.144	778.736	624.077	414.966	765.01	1047.02	333.349	692.225	553.632	1331.57	776.526	1730.75	600.313	609.846	891.079	746.71	1296.54	2249.93	698.841	568.018	687.18	618.734	671	645.49	714.102	852.621	765.247	899.531	618.96	659.11	606.069	604.537	623.539
RPL18	424.824	830.866	439.704	644.874	748.106	636.421	442.807	637.428	254.931	339.905	455.205	432.729	770.7	618.254	355.17	638.758	306.043	544.762	1165.87	215.212	441.717	863.962	284.006	480.904	965.342	709.505	862.802	726.843	504.219	459.8	586.511	496.649	572.673	1145.08	416.913	362.982	634.932	427.278	454.688	542.89	485.201	506.593	613.266	1143.58	484.219	464.084	329.519	404.339	499.223
RPL27	1050.23	617.548	665.557	701.648	1059.12	959.977	709.023	1041.5	873.189	637.524	668.943	827.687	944.556	744.884	757.822	507.507	570.946	865.577	1710.87	438.768	707.734	1187.01	478.385	795.202	1331.84	1334.77	1066.28	1629.81	567.103	538.915	662.339	666.404	852.795	1199.48	665.197	580.524	533.337	671.855	667.506	904.71	677.767	1002.1	977.693	1440.59	636.043	762.294	668.979	651.123	695.034
RPL4	953.225	432.915	668.026	577.616	1035.75	900.167	721.567	796.309	661.817	517.731	564.387	739.984	721.331	717.737	591.381	781.593	496.262	661.032	803.274	370.012	663.3	992.484	435.489	648.29	710.041	1141.8	888.496	1263.6	414.863	600.208	826.288	563.93	677.195	1251.47	676.858	576.466	445.043	521.52	527.793	711.519	657.896	854.908	631.694	1155.84	537.582	576.814	559.429	715.745	683.245
RPL6	546.558	473.574	546.871	289.964	430.172	471.237	472.141	538.117	363.147	263.131	268.74	418.609	435.949	332.328	347.323	737.329	303.929	365.889	570.985	216.159	286.606	625.218	231.228	373.883	507.795	679.853	547.143	716.249	419.783	331.752	290.207	251.318	250.02	424.096	350.853	326.838	208.8	230.92	313.366	311.258	311.413	505.509	440.191	664.156	360.537	296.14	211.048	410.186	368.31
RPN1	321.929	230.42	212.224	217.333	328.374	198.277	209.216	466.661	499.317	336.915	326.112	350.319	660.519	261.25	274.648	171.195	274.93	244.982	302.529	82.9368	336.867	242.591	201.145	300.539	257.616	267.986	268.358	280.942	337.769	267.612	352.66	239.687	285.897	255.794	262.012	306.162	256.926	292.16	237.999	295.163	281.785	234.145	204.439	436.78	256.45	260.607	294.211	287.749	244.04
RPN2	458.121	193.393	279.626	233.394	515.176	281.833	256.974	443.459	688.25	402.348	422.221	571.444	312.571	382.542	407.212	165.355	471.665	281.699	452.976	126.459	395.239	333.956	150.917	366.835	324.52	439.179	502.098	343.44	733.541	350.834	342.441	307.451	346.871	486.707	391.514	366.373	283.698	359.92	283.755	408.469	386.329	300.234	245.354	754.151	316.137	425.486	375.997	384.975	287.196
RPS21	1006.01	1375.17	793.078	948.06	1744.08	1183.31	856.249	1395.09	575.89	622.271	903.151	825.674	1403.49	1159.39	1145.16	771.314	606.931	1040.29	3528.47	415.366	754.123	1700.81	418.646	957.123	1928.28	1452.29	2039.83	1772.78	1444.35	553.939	960.172	810.235	1190.09	2332.45	768.499	891.564	924.293	702.48	725.001	925.637	956.66	1012.82	1251.5	3142.91	852.644	931.508	893.015	746.409	894.962
RPS23	154.094	253.332	102.662	67.237	145.454	103.119	122.313	117.965	105.426	48.4189	86.2943	104.981	106.187	73.9804	64.1493	183.51	87.4752	111.088	159.504	42.8481	109.586	176.486	68.3369	93.4222	141.001	166.156	120.532	148.601	76.269	80.6551	117.062	111.849	43.7552	272.872	110.399	82.966	128.461	47.8679	85.963	108.752	123.327	182.065	85.1151	118.996	80.4011	84.5642	72.9876	61.8106	98.7558
RPS26	151.011	224.295	213.31	407.324	363.729	134.95	75.3232	344.593	413.853	327.104	184.278	162.502	283.407	101.506	115.863	357.413	98.876	111.455	355.658	109.814	228.042	639.062	175.384	252.637	534.367	347.702	534.791	170.642	254.638	124.055	215.204	94.159	248.393	120.99	378.56	254.85	103.39	124.592	160.305	318.074	78.9913	110.177	110.377	262.689	249.564	140.815	216.216	174.226	104.424
RPS27A	677.261	310.217	529.134	453.326	687.148	718.069	499.567	623.937	342.849	455.669	440.779	440.447	451.537	557.707	508.687	262.431	358.657	476.396	786.233	262.867	478.793	893.269	274.874	444.632	803.695	787.884	882.75	1012.67	365.971	360.251	534.12	448.899	559.858	848.721	490.23	367.063	479.494	295.763	383.668	555.829	455.298	672.042	609.385	969.346	421.85	536.998	450.663	390.079	451.566
RPS28	412.167	633.965	344.438	442.453	438.406	566.585	401.146	512.924	239.543	277.674	311.407	355.55	508.85	602.808	455.92	493.851	167.286	394.312	708.44	158.936	224.682	712.146	248.956	476.237	618.55	593.407	610.403	711.05	329.005	303.092	499.366	387.493	446.75	698.096	413.558	374.612	458.875	259.491	298.636	502.39	314.461	482.753	501.324	1046.83	382.106	271.827	378.975	276.512	350.086
RPS29	113.207	66.3864	77.5219	97.2665	123.525	111.046	96.3245	125.283	147.236	73.1793	55.3402	82.09	98.9458	96.7104	115.978	67.3772	65.3404	101.648	233.158	49.8663	92.7026	186.112	42.3966	90.4155	138.453	168.393	199.474	211.003	90.6016	53.4484	107.752	77.9875	108.372	223.54	85.6112	53.6019	71.3588	61.6499	58.0942	96.5886	87.6681	114.09	114.172	172.34	84.8558	95.3864	98.5573	68.9804	82.8241
RXYLT1	5.8149	6.336	7.3575	1.5227	2.8581	4.1024	3.6127	3.1055	5.3296	2.3283	2.7113	4.3637	2.4151	2.3349	2.277	7.1716	3.5448	2.8898	4.1328	1.8958	3.5959	3.56	2.3782	3.2471	2.7723	3.5161	5.398	2.8321	3.703	3.3503	2.5045	2.9848	2.78	3.4256	3.175	2.8515	1.4101	4.434	2.9626	2.9541	3.1115	4.6739	2.5137	3.2309	3.0517	5.5296	2.4451	3.2777	3.5792
RYR1	1.0752	1.3864	0.7682	0.6261	0.3271	0.9543	1.5114	1.4055	0.1793	1.2709	0.4827	0.4743	1.4096	0.7571	0.1107	0.8303	0.2948	0.5393	2.553	0.4303	1.1783	0.7206	0.2588	1.003	0.3004	1.475	1.4816	0.5745	0.0186	0.8265	2.45	2.1427	0.9864	0.781	0.8928	0.3386	0.5187	4.6791	0.4593	0.7572	0.355	0.7449	0.2223	2.2582	0.3462	1.8222	1.7754	1.2595	0.6755
RYR2	2.1246	6.3049	1.7797	0.3073	0.3399	1.7747	1.2287	0.9087	0.2887	0.3571	0.6446	1.5009	0.2137	0.6362	1.9022	0.2538	1.0361	0.8366	0.3452	2.3503	1.084	0.6133	0.3788	1.1571	1.6782	0.514	0.568	0.3757	0.6146	1.0811	0.2745	0.8767	0.4124	0.5512	0.6638	0.5328	0.3068	0.3321	0.4674	0.6948	1.0296	2.5171	0.7734	0.3128	0.6952	1.6938	0.361	0.6514	0.7811
RYR3	0.4812	0.6425	0.74	0.1685	0.117	0.345	0.2246	0.2412	0.0643	0.0991	0.129	0.214	0.4812	0.093	0.0637	0.632	0.7788	0.5133	0.0704	0.1909	0.2675	0.2631	0.1846	0.3522	1.1432	0.2426	0.2017	0.116	0.0729	0.6547	0.2084	0.2268	0.0916	0.2622	0.3077	0.1953	0.1043	0.2528	0.2388	0.3352	0.2874	0.5695	0.2544	0.2215	0.6995	0.1181	0.1333	0.1203	0.3577
S100A12	11.0923	0.8903	4.1659	0.3535	1.1089	9.7144	1.9955	0.6172	3.5432	0.8049	0.576	0.781	1.1803	1.2593	0.7295	2.6109	16.9046	0.7558	1.6255	2.4646	1.5865	2.8019	1.937	7.9688	2.5311	13.9425	0.3319	1.3278	0	1.7975	0.1508	0.547	0	6.8591	6.7546	1.8808	2.2588	2.6972	0.5672	1.2789	2.0921	16.0162	1.1185	2.6363	0.4852	0.9912	3.2173	0.0841	0.3617
S100B	51.671	32.3111	45.828	32.7821	4.7648	79.389	27.8668	17.7347	12.1431	23.3099	13.0558	19.296	37.9643	9.3677	4.571	146.761	5.7736	20.8543	8.3336	12.0554	27.6928	30.4077	3.1558	39.6095	10.1957	33.1039	10.6076	21.068	0.5474	25.9286	6.3589	10.6949	3.5333	15.2734	22.1409	28.1768	11.6014	18.9294	11.8304	26.3604	15.7645	29.0157	27.8526	34.4672	12.5088	17.7376	22.0882	5.6942	13.5997
SAA1	758.585	327.885	220.362	124.839	43.9352	47.8824	21.5832	154.137	216.331	226.906	17.077	13.0709	255.216	58.4957	86.5383	3.567	17.7654	750.263	126.077	400.929	71.108	131.276	216.384	71.8535	8.0947	473.106	2.3808	42.7813	7.3797	61.7438	10.9207	52.7641	5.1851	55.7376	72.604	542.177	1387.74	73.9445	36.0336	74.9147	57.9214	64.5152	284.571	479.784	38.6127	81.4962	56.4715	27.4739	23.3503
SAR1B	22.0812	35.1326	22.0455	11.511	13.1849	18.745	14.2015	17.1706	22.4316	19.0956	20.2581	24.8801	13.0527	13.6033	17.5838	36.6372	28.2531	13.1541	12.0467	8.6978	24.1616	13.6805	14.3265	14.857	18.8407	16.8885	19.2772	14.1345	29.8008	22.9288	19.5029	13.6417	24.1473	20.6223	19.8452	18.0119	20.3359	21.7097	16.7126	19.1721	15.6541	16.2203	15.5738	7.7216	24.2503	23.6078	22.0905	16.7875	24.9962
SBSPON	16.8399	6.0532	9.9478	2.2832	2.98	18.9512	8.417	5.4692	0.9177	5.5032	6.1618	1.0399	11.2196	1.5983	1.3501	1.9153	4.9805	3.4471	1.5573	1.7655	1.3829	11.5235	6.4094	6.6001	3.168	3.8621	2.4073	3.6111	1.1549	8.8458	2.2901	3.1863	0.3441	1.8622	14.8131	2.8468	2.2077	5.4405	1.8854	4.8913	5.3132	9.1322	7.2014	1.7295	2.268	2.808	1.5217	1.659	7.993
SCFD1	7.2189	5.2467	6.588	3.5735	6.8064	4.6715	4.8222	6.7258	9.5102	6.3975	3.6855	8.1909	5.8437	5.7268	6.4325	4.8118	6.4994	5.7554	6.2998	3.5374	9.0904	4.4176	4.436	4.6495	6.1578	7.2307	10.983	5.2159	6.1379	5.8835	6.006	5.0209	4.5469	8.6796	5.4405	3.6232	5.6197	6.3743	4.7753	7.0122	5.3039	6.2899	5.1211	3.6475	4.9393	7.8449	6.4542	6.4496	6.3212
SCGB1A1	0	0	0.1887	0.5871	0.6578	0	0	0.1025	0	0	0	0	0.1089	2.0917	0.2019	0	0.072	0	59.029	0	0	0	0.1072	0	0	9.4653	0	0.2757	0	1.706	0	0.0909	0	0.2373	0.33	0.1116	0.3517	0	0	0	0	0.2111	2.7867	15.6714	0	0.0748	0	0	0
SDC1	202.752	10.2267	209.839	276.562	490.235	255.105	139.623	661.304	230.7	313.768	831.583	606.082	621.097	416.986	365.675	21.1945	244.321	959.235	666.745	35.5537	536.338	194.321	217.101	236.814	190.963	289.237	373.392	217.93	316.281	349.009	610.551	557.507	251.677	325.084	376.798	457.828	779.106	288.158	544.936	605.606	525.733	135.073	207.117	445.453	569.986	395.15	431.257	292.933	357.938
SDC2	77.4827	35.5398	58.9083	26.4467	23.2718	68.5399	55.7961	56.3635	107.036	38.125	42.8358	160.734	23.4849	39.3168	31.7352	26.9912	26.9626	165.503	30.7104	31.1084	98.0125	47.7582	28.1715	137.873	55.4023	85.2057	41.4883	55.5709	4.9624	49.1878	29.929	86.8445	16.1054	93.132	51.9985	60.0354	45.2506	53.9619	64.5526	111.405	61.8352	88.7159	33.835	37.2395	57.3467	86.699	39.1206	47.4433	63.2112
SDC3	71.0602	31.5889	36.5692	25.0429	25.5565	78.8612	42.7257	56.164	37.3649	61.336	60.5321	61.7508	46.7408	20.2896	16.709	26.6677	48.5554	48.1079	18.9495	16.8707	76.8973	43.7528	44.4221	59.8563	69.5092	44.0659	30.2376	33.1488	25.5791	62.1907	43.3711	33.4376	9.7893	51.3737	55.6979	51.1201	42.5073	28.601	77.8365	41.2206	62.4832	69.5469	25.2964	26.6988	55.0417	41.4696	32.6872	70.3939	54.4064
SDC4	379.196	45.2544	123.492	473.056	1152.4	206.224	383.047	711.852	1217.55	1278.61	978.36	984.878	763.205	516.005	1135.53	52.8728	356.391	228.97	736.907	161.4	768.211	276.764	159.68	240.418	424.863	229.273	1045.52	746.717	334.981	413.084	810.506	456.143	797.11	658.526	823.812	666.553	430.531	933.08	580.195	432.633	422.056	145.289	593.239	1003.45	298.948	961.977	977.182	236.808	475.283
SDF2L1	70.7947	102.924	69.7595	64.2704	76.4698	115.674	62.2477	61.7326	70.162	68.0765	87.0029	45.5154	58.3773	96.661	82.8526	291.189	60.2285	75.4557	71.1956	21.6073	57.5105	96.5425	108.702	122.624	87.2017	82.7057	113.481	63.902	109.782	41.5133	55.189	51.8103	76.5253	48.4291	61.1418	70.1403	54.4406	49.9874	72.2157	53.7404	67.8029	71.7792	65.428	115.653	76.4963	37.0173	65.4078	63.5441	76.7845
SEC13	75.6503	50.5632	51.4367	53.0259	59.7523	54.9826	48.5017	82.523	79.5484	70.871	74.3393	70.7235	72.7054	57.3073	45.9669	54.0722	82.1437	78.7943	72.7883	23.5512	79.8368	64.0233	64.0159	70.4659	60.362	97.7886	91.9537	56.8975	85.8318	58.5199	68.1037	55.6372	83.409	72.9129	64.5995	75.9838	74.7199	74.9717	63.3025	60.5873	60.9294	71.6994	49.3155	139.093	70.4216	57.9994	90.6538	70.2846	63.0169
SEC16A	51.2495	76.0934	49.9789	23.3573	39.3598	53.7991	41.5487	28.3461	51.961	45.2559	45.3041	52.1095	35.7768	27.7982	45.7302	57.1984	60.397	34.7899	43.0519	19.6226	61.4182	35.7009	52.0195	40.6122	42.0377	32.335	62.4013	33.1355	105.183	60.803	44.974	47.0572	53.9671	46.3916	48.2103	39.4467	51.1388	50.4989	46.0192	59.8054	50.1489	45.0244	31.4284	35.533	47.9254	55.326	38.8486	44.5518	58.5755
SEC16B	0.2524	0.092	0.1643	0.2479	0.3541	0.1127	0.1676	0.3408	0.0776	0.1764	0.1288	0.1669	0.3276	0.0994	0.1439	0.0542	0.2394	0.2236	0.1943	0.0926	0.2648	0.1084	0.1528	0.1238	0.2496	0.1891	0.0873	0.1309	0.0938	0.3376	0.0992	0.1726	0.2329	0.2349	0.0653	0.1943	0.1485	0.4019	0.3605	0.1261	0.1699	0.1003	0.5214	0.1733	0.4386	0.2133	0.1563	0.1217	0.5708
SEC22A	13.0201	8.0515	10.3944	6.3659	7.8237	8.5626	9.2472	11.0596	12.9947	8.1194	8.2433	11.8371	14.846	5.9466	6.6186	9.1808	9.671	8.2793	10.0861	5.0187	11.9406	9.1594	5.4189	7.4841	8.244	10.1425	9.7879	9.469	6.1577	10.1136	10.1076	7.2646	5.3844	6.7184	9.197	9.9175	5.7059	9.0288	6.7448	8.3074	8.5774	9.8294	9.2047	16.1227	8.0166	7.2187	7.4563	9.083	8.6338
SEC22B	24.8827	12.3179	18.2317	10.2927	12.1127	17.0578	14.8356	15.0082	24.8595	16.7434	15.0332	23.9283	13.2285	8.926	25.846	10.2781	26.3646	15.9065	10.0856	9.4128	29.3546	10.0285	14.7448	16.9475	11.7227	15.7695	40.7408	9.8675	19.3367	17.071	15.489	14.1771	17.3502	20.0657	15.8936	15.325	17.1954	13.9513	9.4752	18.5283	14.6592	21.6821	11.1354	8.3458	15.0932	19.1317	16.0167	21.4494	16.5654
SEC22C	29.7897	15.9145	26.3169	8.8673	11.7146	18.5239	16.5543	13.2589	14.7432	17.4567	15.0933	21.7505	9.7052	12.9653	8.4268	24.8727	15.5678	14.9153	12.9565	8.9839	21.7264	15.3426	8.5514	15.4079	15.6064	16.9639	15.8342	14.6875	8.2636	22.8199	18.7016	13.0983	6.8403	15.3069	19.3084	17.0418	11.8412	17.6259	13.5317	14.0265	14.8065	25.6906	11.7139	13.0235	19.0429	17.21	10.7513	21.132	16.9975
SEC23A	46.9975	12.1446	26.2622	9.5487	23.5289	27.1918	20.6196	35.5676	60.8716	16.304	15.0008	72.9583	13.4917	19.8463	26.8137	10.6202	31.184	42.2102	27.1698	11.1656	46.4886	11.8058	15.0285	38.6891	42.6543	23.3571	44.7824	13.4412	9.8974	25.095	19.7314	22.7448	19.2545	47.3857	22.0966	28.3875	26.8349	18.6707	19.9492	34.2195	23.3165	55.3994	12.1865	8.0738	45.9231	41.24	31.9548	40.1158	25.7583
SEC23IP	37.0037	10.7302	26.8764	17.3546	28.0228	23.5929	20.5152	23.3685	29.9914	19.1209	18.2781	34.2729	16.2188	14.158	25.5039	11.9244	32.5449	18.0308	23.5366	11.4411	42.2087	14.2412	12.6107	21.295	29.8298	16.2569	21.0491	20.2981	40.4284	25.9015	21.468	23.6542	29.6065	33.9861	22.139	25.6408	21.1861	28.6181	22.2848	35.9666	20.2785	25.5257	17.8798	12.0662	21.7568	29.5008	35.1877	30.2046	26.6497
SEC24A	29.0982	10.1609	21.5244	7.3756	20.7704	15.4455	15.8039	18.2204	38.4514	17.9732	15.2272	34.4058	9.8924	10.7057	40.2108	11.9196	35.7245	13.0587	14.961	10.5453	38.6004	7.543	13.2717	17.4542	16.1403	11.0853	22.4776	8.9578	22.9286	20.993	13.3936	15.5455	41.3299	30.1235	20.2459	18.5077	20.9329	15.5976	12.4008	22.0133	17.6907	21.4688	11.1198	4.9564	23.3595	30.9893	23.3274	24.5713	20.8137
SEC24B	49.637	18.0599	35.6798	16.0525	42.6635	27.7199	28.373	38.5998	48.9662	28.238	31.7429	53.7626	17.7195	20.8425	40.3348	20.1125	33.5215	24.7749	26.3524	18.9363	61.8069	17.3841	18.3848	26.7535	28.6316	21.3786	40.2543	24.7608	26.8413	44.6473	27.3586	33.735	25.0083	47.0627	34.0069	30.5746	31.1983	27.8892	27.7783	30.6042	30.1007	35.1188	21.1474	11.45	23.9312	47.4876	35.8385	40.1204	32.2871
SEC24C	46.3973	10.7283	37.518	10.964	45.4278	22.9358	21.2844	25.2643	27.6537	22.9244	23.8819	38.5298	19.8067	13.1326	26.2608	16.484	33.295	15.27	23.5104	12.481	51.5801	11.812	15.3505	20.4128	29.7495	15.8807	29.0966	13.7948	30.7125	35.6892	32.5907	25.4956	25.4827	43.1787	26.7657	28.1903	26.7079	21.0979	25.6611	26.0142	22.724	20.834	12.3174	5.9966	25.8709	33.5383	34.2189	36.6232	28.2507
SEC24D	46.6876	18.4992	39.813	12.6219	25.6212	26.2711	22.8029	33.4398	55.5652	29.7913	26.2022	67.1757	10.6944	15.7432	36.592	24.5689	44.8294	37.6156	17.231	11.6108	49.987	16.4788	20.5128	36.148	21.4813	33.1364	23.9451	14.612	48.543	28.3103	18.5672	31.8218	38.2739	46.4462	28.6436	28.0725	35.4917	25.2752	23.3313	39.3931	27.2141	43.0678	14.2379	8.0184	34.8891	35.5436	32.4302	39.9117	26.0944
SEC31A	125.783	56.8612	82.0615	47.1648	78.9895	65.5129	65.295	96.0242	161.433	73.6252	83.4834	155.465	52.4787	55.7814	72.6336	51.2119	97.4081	94.397	57.1073	41.6297	184.972	46.2834	72.8097	79.5214	65.7015	74.4834	74.9953	59.2763	74.9771	92.2162	63.3524	91.0353	89.1375	126.699	82.3928	89.2513	79.4962	85.625	80.7304	103.731	80.2501	113.234	50.7848	41.0993	78.5292	97.4413	71.8046	105.759	87.6427
SEC61A1	294.272	309.275	225.797	161.429	363.199	220.143	218.168	476.02	490.503	266.223	291.676	419.749	560.853	269.302	271.598	249.85	247.276	263.2	252.341	128.752	337.457	247.2	199.379	323.62	259.451	318.107	316.421	241.217	287.035	269.989	314.505	234.781	276.508	242.705	265.386	279.64	231.267	260.334	269.048	561.365	280.245	274.222	171.733	464.088	253.998	246.374	251.908	296.618	242.019
SEC61A2	5.7946	4.4106	7.6923	3.6921	5.5329	5.0013	4.0368	3.6538	3.3434	5.4831	4.8369	4.1835	5.0512	1.9808	4.4269	5.5481	5.2502	6.8564	3.3858	1.9623	5.0633	4.1846	2.8468	5.1859	4.4171	2.9054	7.667	2.0693	2.2721	9.1274	3.8479	5.7047	2.1685	3.0618	4.3059	6.6554	3.5844	5.4117	7.1186	6.3359	4.4049	6.0768	4.0551	3.5916	3.7257	7.3545	5.4572	4.4914	6.9888
SEC61B	192.936	208.422	183.769	134.194	138.794	205.395	154.635	206.192	298.622	168.881	247.574	212.735	276.295	202.729	216.451	173.091	198.435	244.896	185.605	119.173	188.577	256.999	199.237	254.983	180.457	260.569	287.818	242.094	249.808	163.375	147.687	185.523	174.987	150.02	187.844	178.332	175.284	176.585	143.501	231.645	204.633	240.888	197.874	347.551	160.92	193.752	153.417	179.875	197.42
SEC61G	98.7013	85.2938	66.172	60.5289	143.821	96.695	59.8402	132.962	248.155	97.6342	105.135	101.997	99.6508	117.013	131.76	71.9643	84.1353	98.8507	88.6334	39.4458	120.142	106.755	76.7072	113.416	77.0638	147.6	184.671	143.021	159.722	50.438	86.888	84.0308	95.6929	99.4815	78.2541	80.8621	89.0644	64.8159	54.5112	129.647	78.7724	99.4027	85.9139	204.551	80.1972	96.8006	115.243	67.7926	79.194
SEC62	110.59	39.938	89.3184	27.7951	66.5598	58.0299	59.0112	74.0409	149.199	45.4591	55.7612	132.155	60.3854	41.8398	54.518	48.9419	75.2225	42.5475	47.5596	48.2206	115.284	38.7179	33.0454	52.1441	58.5153	76.1215	44.8865	81.4189	49.8914	70.7842	46.1234	50.1247	50.3548	75.8886	55.0797	52.1549	54.2206	68.7518	46.6704	135.101	57.1196	63.8971	35.1205	38.2395	48.5233	76.1875	57.2739	74.7246	64.5494
SEC63	66.4546	26.0186	59.4361	18.8986	24.1764	37.5496	36.8745	43.6307	51.8497	43.0194	29.8782	65.5925	20.2499	32.5253	42.9601	24.9592	45.6308	35.8626	36.4925	34.0045	48.6441	30.9676	21.8763	36.4741	29.9287	35.0529	42.5755	36.0369	39.7577	49.7523	28.3378	34.621	36.7258	51.9513	42.3098	34.9632	41.8973	40.7069	24.6028	39.8039	36.8621	43.8268	27.0874	29.2919	29.1896	40.2343	33.0303	51.0414	32.7389
SEL1L	106.904	35.9016	46.9338	17.4499	71.5243	31.9705	70.4907	58.645	82.9092	42.0514	24.5066	131.761	20.9722	68.9339	57.9102	40.4213	53.9897	32.4322	37.849	156.618	103.635	26.3247	29.7976	46.4298	59.455	24.1175	44.7755	51.1376	31.9461	59.1216	43.6299	38.3933	18.6261	71.9322	55.8268	52.8456	31.5011	42.0121	39.9122	52.805	71.1019	48.8913	28.2894	15.8921	46.1628	75.2364	54.1786	116.851	44.0106
SEMA5A	25.7045	15.6217	13.061	4.2159	3.14	12.0544	11.2316	8.945	10.6177	7.0099	5.6065	28.9523	2.5786	3.3992	3.1236	22.726	10.2584	14.362	2.4457	6.5936	14.5708	10.6253	5.282	10.9504	6.6144	13.6698	4.0678	4.6393	1.751	11.9602	5.9372	7.7473	2.8794	15.6428	10.9051	10.2965	6.8593	3.8333	8.4412	10.6211	12.9674	23.8575	4.2993	2.7939	4.9041	8.1454	5.1372	14.0648	11.1821
SEMA5B	2.0326	1.1298	0.3321	0.5099	0.6225	2.3321	1.6856	2.0033	0.538	0.9702	0.6823	0.9784	0.5974	0.6095	0.4569	0.6104	0.8836	2.1411	0.5133	0.9574	1.8833	0.7978	1.559	2.4917	0.4979	1.0838	0.9923	0.6112	0.2089	0.9212	0.6098	2.8348	0.4322	0.651	1.301	0.918	1.2783	0.8294	1.5611	1.0196	0.6587	1.1437	0.5906	0.4978	0.9463	0.9236	0.6532	0.4264	1.0711
SERPINA1	1059.91	14208	215.026	2147.21	1207.31	282.46	362.625	1120.36	233.537	2004.54	440.449	253.665	956.658	1188.72	1259.64	244.041	1247.64	145.812	262.612	191.288	1229.05	1349.38	917.152	743.726	199.78	843.638	1492.85	847	470.079	1191.03	204.954	284.356	257.975	750.32	1976.61	1823.36	733.095	2192.19	1577.47	119.672	962.234	491.412	528.245	105.692	541.739	831.313	607.978	1168.19	1344.31
SFTPA1	1.7165	1.0822	0.8693	0.2798	0	0.4523	0.0219	0.1221	0.0334	1.115	0.4787	0.85	0.0259	0.1246	0.2887	0.3263	0.1201	0.1122	0.1462	0.2438	0.3622	0.6197	0	0.258	0	4.0727	0.3284	0.0876	0	0.6606	0.1791	0.6062	0.4206	0.1979	1.1794	0.319	0.0838	0.1067	0.1122	0	0.1461	0.0755	3.4205	0.5491	0.192	0.2318	0.5259	0.2997	0.4653
SFTPA2	0.9213	0.0458	1.1995	2.0993	2.5658	1.0969	1.4165	4.7316	0.2429	12.3855	2.5916	0.1406	4.2244	2.2663	1.1377	0.0247	1.9969	1.1221	0.3989	0.3168	2.0864	0.1483	1.0923	0.8083	3.0643	0.1593	16.3376	5.3168	0.0367	0.7394	12.3496	2.1461	6.2473	12.5239	0.7866	10.0817	5.5133	3.9803	2.2457	3.1072	0.908	0.2745	0.2379	0.1249	1.921	2.3189	6.5199	0.2726	4.8823
SFTPD	1.2043	2.0668	1.4042	0.6877	2.0668	0.5232	1.4337	0.5792	0.5599	1.3204	1.4107	0.5363	21.9262	1.1385	0.5287	2.0286	0.2877	0.4325	0.6764	0.9771	1.1173	1.3015	0.4138	0.8954	0.474	1.7096	2.0323	2.3806	0.0233	1.0873	1.3463	1.227	0.7992	0.8831	0.9776	0.8763	0.4039	2.5517	0.7573	1.0245	0.7183	0.6837	1.6291	1.7149	0.9162	0.7734	0.9605	0.3178	1.0556
SGMS1	26.9527	7.4909	18.914	5.4184	26.3405	13.5631	14.0135	13.2634	11.7974	13.3515	8.8208	11.7358	6.6246	5.2014	6.6099	6.3502	27.1724	7.9325	8.7034	8.6006	17.0199	10.2176	7.401	11.1482	9.5213	11.9233	8.9353	11.2127	4.4943	24.7606	9.3727	8.121	7.4664	23.1991	14.7762	9.7385	13.1122	12.8989	10.9644	13.2546	10.2498	20.5019	10.6263	2.9022	12.4109	22.1337	9.6963	15.2103	11.3352
SLC17A5	49.5686	19.486	49.6641	19.8961	29.0271	45.8553	27.0796	41.2336	38.9293	39.1795	24.0318	51.5453	14.5652	19.0453	61.0049	23.4161	56.1697	34.5137	35.6576	14.9125	50.8277	20.6984	23.334	39.6379	57.5498	28.6352	40.96	27.3552	49.7317	40.2828	23.9575	36.8866	59.5275	66.1236	27.5254	42.3963	33.8077	31.3257	31.7387	49.6174	26.7645	32.9659	31.8164	18.8918	34.3477	57.089	44.4001	82.1981	46.3701
SLC26A2	33.6817	11.7978	14.5358	5.5948	12.8681	13.0605	12.3455	7.8497	21.7832	7.5683	7.1177	25.8265	4.4626	9.3892	4.1097	11.5659	9.6046	10.2317	6.4319	5.2841	16.8042	7.3228	5.847	16.2325	8.7275	6.305	6.3231	6.6988	6.752	14.8055	6.4708	8.547	4.7026	15.3475	15.4973	9.7659	11.1485	9.3512	10.7836	10.3562	10.2748	24.2503	7.2709	3.0981	14.4745	23.2062	5.9856	19.0297	12.2989
SLC35A1	22.2755	13.0856	24.2079	15.8774	17.1081	21.4971	14.2915	15.1919	26.4285	18.3385	17.9895	28.732	24.752	13.7223	26.9101	11.3639	37.9753	19.2557	18.3666	7.5147	16.741	14.2715	26.918	13.9553	28.375	15.8526	34.5144	29.8471	69.0632	22.4222	13.9766	20.5173	13.2684	31.5248	14.6897	37.9046	10.3702	39.5377	17.1992	40.7509	11.7937	14.5931	23.3222	10.3608	23.1604	27.484	21.4006	29.3886	21.9515
SLC35A2	30.3326	35.9403	33.5672	25.4683	36.3544	38.9755	29.6481	49.732	105.013	50.6628	72.8674	37.4742	42.6621	37.2329	51.1718	27.4235	50.465	29.4364	42.7337	13.1092	61.2102	23.65	31.0728	33.3243	31.0952	18.6439	51.305	34.2915	61.4542	39.8395	75.2964	47.1403	68.0644	44.3225	33.9615	55.5702	66.7889	46.9468	42.9231	70.103	43.51	23.7051	31.1827	56.8906	44.2367	58.5114	80.3237	50.5502	40.6619
SLC35C1	55.7287	21.331	30.8579	43.0042	49.6883	50.4226	36.9789	47.5846	67.2378	54.5714	84.3372	59.9218	50.2911	55.1815	36.3685	17.4913	113.613	33.1076	41.7624	10.9949	74.1406	46.0227	44.3182	47.6022	62.5231	54.1523	38.699	35.4123	92.1758	91.2437	79.5472	44.2854	59.5107	53.9782	57.3891	62.1973	76.4755	75.1921	59.3495	67.7911	74.1195	43.4333	33.4836	44.1628	64.7059	76.1723	74.0399	69.6535	61.4367
SLC35C2	25.7792	34.5637	20.217	24.8592	42.8021	31.0656	22.385	29.8325	24.6934	24.5896	33.1054	36.6478	33.3195	31.5603	26.0863	30.3312	26.4171	29.2697	39.8793	9.9637	27.9504	32.771	13.7807	28.4344	31.9531	29.1036	29.7307	25.5796	74.4528	35.659	39.345	26.084	26.4723	31.3891	30.6009	34.4972	24.9349	41.2291	30.4789	29.956	29.4795	27.3377	22.5912	52.3482	27.4995	32.244	33.7275	27.7951	35.6881
SLC39A8	16.9235	7.7963	20.0685	7.4344	10.0902	11.0773	13.3675	19.7062	19.5735	10.9849	10.1401	26.5824	10.198	25.4108	8.954	7.4668	11.8997	9.4748	12.3541	16.1143	12.7143	11.386	5.5478	15.1384	6.6993	17.4668	14.3472	18.4268	84.4124	11.8582	9.9901	10.6781	5.1964	9.4119	13.8433	7.0586	10.3975	12.772	11.7029	11.2714	16.331	13.7665	8.8357	14.7882	8.9607	11.6203	6.847	17.3247	8.5146
SLC51B	3.359	2.6703	3.7372	1.608	1.081	6.1988	1.7457	2.786	9.2103	1.69	1.7536	3.8945	0.7572	0.8593	0.6382	2.0196	1.8201	1.8843	0.5429	1.2012	1.2811	2.3358	1.6268	1.4449	1.2078	2.7298	1.6552	1.1035	0.214	0.5391	1.5041	2.8714	1.1687	2.2502	1.5642	1.7629	1.1115	3.0203	0.9924	1.3426	1.0981	5.0708	0.7472	0.874	41.5124	2.4122	0.8811	2.2524	2.2784
SLC7A11	1.5089	3.4664	2.3995	1.979	5.9745	9.2621	1.6892	4.9036	3.8942	4.2365	10.7693	4.2709	4.2863	1.4375	24.9802	0.6564	7.2756	2.6033	5.8628	1.6333	4.4552	0.7873	6.7209	3.315	2.7422	2.7042	2.4536	7.0942	29.0584	3.2927	5.2406	5.9307	2.8652	22.7068	13.6562	11.8424	14.5319	3.6349	15.6396	18.0876	2.5558	0.5625	2.3418	1.1303	3.3487	6.3345	5.8522	25.4075	3.647
SLMAP	22.063	6.6702	13.5285	6.7287	22.0964	12.4476	13.3824	13.7965	34.8965	18.3423	19.9847	24.5843	8.6905	10.3897	12.0275	9.115	30.7667	10.4422	18.6108	6.1568	26.9237	8.095	9.0163	9.7025	39.9775	13.3678	26.5118	12.5884	10.5931	19.7118	23.9156	12.5372	17.0176	25.9354	15.0048	21.5925	19.2575	18.3018	18.6802	14.7914	11.7259	19.6081	10.4234	7.0524	19.4614	23.2313	16.1711	16.4931	20.3181
SPON1	207.056	13.7709	83.6691	22.2699	11.2424	112.537	95.2302	96.9898	48.8794	23.9729	21.1852	129.463	39.9414	17.69	28.7675	11.9704	69.1284	107.269	22.9013	33.1439	61.0907	49.1013	26.0205	118.086	101.795	248.584	26.5989	27.5443	3.198	65.0222	53.9839	125.487	11.152	57.327	52.6435	31.0526	56.9712	45.4012	36.6828	79.9709	76.9856	332.123	5.8155	92.3295	65.2922	101.814	24.5237	24.1458	36.0969
SPON2	50.4866	40.5563	59.2435	55.1134	120.852	169.498	69.4095	114.312	44.586	62.5437	70.0361	171.942	52.561	75.5061	44.138	42.3481	28.4373	186.934	70.4718	14.5654	107.872	134.095	91.8059	151.424	180.252	53.2909	79.6189	33.2126	16.7822	105.022	67.7214	82.0814	39.9246	49.1337	90.5412	209.481	99.772	101.33	113.301	110.998	134.881	209.867	13.9418	117.994	211.288	117.877	69.5992	94.2993	117.207
SPPL3	37.2769	32.2921	28.7916	20.8627	32.9183	28.6066	30.4573	37.391	44.8903	26.0303	26.4896	34.5141	32.7325	18.3348	29.5404	39.7232	24.1573	30.2613	33.1493	13.1745	26.8516	28.6301	15.2462	26.6771	38.5285	28.5141	35.9735	32.1075	34.6953	35.3477	28.956	25.1011	28.3058	36.3755	29.0983	36.184	15.8967	24.3859	37.2632	31.7641	24.2548	28.2002	24.8096	36.0475	33.9254	36.5884	27.5281	30.8377	34.7632
SPTA1	0.1706	0.0122	0.0327	0.0226	0.0304	0.0457	0.0213	0.0711	0.0891	0.0129	0.0111	0.0656	0.0063	0.0302	0	0.0132	0.025	0.0725	0.0142	0.0549	0.1522	0.087	0.0124	0.139	0	0.069	0.0159	0.0106	0	0.0616	0.0651	0.0787	0	0.0549	0.0477	0.0129	0.0271	0.0173	0.0454	0.0307	0.0118	0.4879	0	0.0133	0.0291	0.0216	0.0201	0.0646	0.0434
SPTAN1	95.0833	56.3884	69.8168	41.3157	76.7289	98.1723	75.5563	67.3242	133.332	72.2728	86.2456	146.753	67.7568	57.6526	54.6079	50.8968	59.3604	61.7771	79.1681	22.9227	106.704	63.9931	44.6731	67.3652	79.675	85.0122	91.5366	62.5621	45.1706	100.686	99.4192	87.0064	73.8075	114.647	72.6562	83.1871	58.5647	81.5674	71.604	76.2754	76.1451	88.8014	44.2947	51.6443	66.9992	90.3402	78.5937	80.0377	93.7274
SPTB	2.6244	12.5321	10.2267	0.5755	0.431	1.1051	1.3736	0.4774	0.1272	1.416	1.182	1.3376	0.8339	0.3674	0.2551	3.0449	0.2671	0.5202	0.1695	0.7559	0.896	1.1994	0.491	0.6079	0.4412	2.3214	0.9412	0.6891	0.5212	2.34	0.2719	1.6892	0.3782	0.4309	1.7973	0.6782	0.1527	0.3419	0.5268	0.3144	0.6414	2.1417	1.2032	0.896	0.2863	0.5671	0.6694	0.8412	1.6896
SPTBN1	176.746	50.7723	92.3531	57.1039	110.734	146.897	109.581	108.278	135.668	127.79	106.567	200.692	52.3094	81.9685	170.28	39.5877	88.2502	61.0749	93.9231	42.1774	173.627	54.263	54.4971	60.9504	139.105	57.575	130.328	79.1199	85.8128	146.97	127.254	139.3	157.559	204.793	129.098	90.3227	95.6103	102.61	117.233	110.177	100.727	72.0054	76.2891	33.3396	84.4097	144.278	168.238	173.99	148.318
SPTBN2	15.9479	9.3516	14.6965	10.2279	82.6925	20.2731	16.1645	11.6625	9.853	12.5585	37.0372	33.0919	89.9898	19.8809	4.58	8.2118	7.2168	4.9452	17.2033	3.7787	16.1319	12.1497	8.3081	7.2939	18.7155	10.1827	15.4169	20.4317	19.4898	20.4637	36.1946	8.8969	13.6427	30.1318	11.722	26.1023	21.5724	13.6362	20.2948	21.9129	19.5543	5.9808	8.9839	17.2029	10.8412	38.7268	16.4804	5.0219	24.9617
SPTBN4	1.3364	12.1566	12.2192	0.7722	0.5289	2.0805	1.4896	0.6003	0.2712	1.128	1.1064	1.9073	0.2757	0.3114	0.3808	42.6426	0.343	0.7943	0.4324	0.6712	0.9959	1.8953	0.3885	0.6091	0.9436	3.1196	1.2039	0.3603	0.0504	1.4182	0.6216	1.7542	0.317	0.4005	1.1628	0.4984	0.2502	0.9931	0.5299	0.5535	0.5833	3.3112	2.4811	1.0809	0.63	0.4494	0.9282	0.7977	2.0798
SPTBN5	2.3752	1.6383	2.2109	3.2538	4.1936	6.603	1.2359	0.8461	0.2459	2.283	6.4215	0.623	16.7168	1.5229	1.0632	3.1721	0.8059	3.5131	1.2399	0.7282	2.6007	2.7334	1.0428	2.8594	1.1965	0.4359	5.9625	1.3687	0.2891	5.8568	1.9249	1.7326	2.5954	1.2666	3.4199	1.4606	1.4793	18.1476	5.2284	5.1766	1.6095	4.0809	1.8105	1.9786	3.9469	3.1627	3.1739	1.1236	5.7139
SRD5A3	12.0899	4.2849	13.7693	13.7487	23.0908	8.9938	8.444	12.273	17.842	26.3978	17.1925	23.1035	16.1472	11.916	18.5051	3.2398	37.6502	8.3719	29.3103	5.0296	56.9271	12.241	8.7991	12.5191	5.8831	17.304	21.2746	26.1019	15.1904	11.7837	26.1494	11.058	37.5259	18.6068	13.7504	22.1123	20.6136	16.5714	24.1047	20.5536	23.2353	8.4524	9.8914	14.4097	7.4755	29.5262	30.2651	12.2324	21.6409
SRI	65.25	36.0534	56.4421	65.5449	145.065	63.242	50.7277	83.6382	46.4723	49.7925	97.072	98.3944	69.0206	57.9691	52.1566	52.6731	33.7373	54.7307	61.2733	22.3857	80.6717	57.4459	35.88	48.6369	64.7902	74.5199	72.0934	103.788	121.224	45.5606	110.085	66.6238	135.967	100.088	54.0589	93.4179	72.5216	117.422	61.7542	65.6833	48.6421	59.5637	50.0157	96.0695	72.3478	88.2016	114.092	57.7267	71.7147
SRP9	220.708	90.0821	235.952	71.9232	177.788	151.639	129.795	142.036	238.449	198.978	205.651	224.756	114.57	124.904	145.077	99.7584	219.864	126.723	113.606	71.6123	234.963	109.678	190.262	136.014	195.571	171.325	142.096	226.507	299.296	179.854	141.156	143.055	135.848	216.784	145.701	140.057	156.928	141.147	179.266	205.085	126.633	146.238	138.816	127.981	139.02	236.605	205.727	159.796	206.612
SRPRA	215.726	122.195	156.773	98.2718	118.305	135.121	134.875	143.822	211.164	177.284	177.671	215.191	131.054	152.058	137.264	102.507	164.774	119.915	132.885	103.433	204.958	124.915	133.188	144.945	128.694	160.847	147.5	138.576	155.154	174.68	184.651	135.357	114.395	238.477	162.439	171.798	140.359	134.032	128.727	151.221	163.779	144.3	93.0788	116.468	141.843	154.624	124.154	174.804	140.226
SRPRB	65.6295	96.6052	44.3545	32.488	38.1412	41.7813	48.1479	80.2418	105.09	49.6147	40.2052	68.2768	72.604	66.8487	44.6957	51.3919	55.8624	41.2695	53.2816	33.0418	55.0625	47.8473	46.2331	54.237	48.3676	73.3029	83.0866	55.9454	68.6593	40.4235	47.7469	38.4358	71.2034	42.0136	49.0273	34.8176	38.9419	41.0867	35.2787	59.1417	50.7979	57.8831	47.1616	93.0242	43.2874	40.2398	33.7592	56.1871	40.4257
SSPOP	0.2844	2.7573	0.949	0.1652	0.1821	0.6262	0.2523	0.2015	0.0349	0.4287	0.1854	0.0673	0.8201	0.055	0.2012	11.0444	0.291	0.3649	0.1869	0.2752	0.2441	0.7427	0.3652	0.4463	0.4232	0.2391	0.3816	0.0204	0.0094	1.1571	0.1006	0.2742	0.1419	0.0756	0.5664	0.0741	0.1396	1.7693	0.4347	0.3528	0.3027	0.6225	0.3203	0.1404	0.5884	0.2258	0.3409	0.1857	0.5239
SSR4	86.4254	553.014	122.49	147.464	169.001	150.92	149.843	117.176	127.442	199.959	153.409	89.6551	147.3	162.339	138.267	847.25	171.376	131.573	128.703	171.08	129.385	214.168	135.155	144.035	101.45	232.285	153.72	141.372	183.511	112.615	108.199	147.377	317.604	110.808	124.579	117.308	103.352	141.764	119.766	88.714	172.679	107.536	155.154	222.512	127.122	97.7373	114.428	144.555	119.43
ST3GAL1	55.2423	8.1252	64.8268	19.0319	70.7654	37.8106	45.7871	62.437	76.2279	76.0401	81.911	101.105	29.7247	27.109	68.1716	8.5679	33.9607	28.1475	47.6311	21.8371	86.795	36.952	17.3487	44.8594	16.9816	38.2802	76.1284	50.9738	0.7706	49.0872	111.928	33.7908	77.8981	97.6641	53.8802	54.5425	52.9776	27.6251	59.9478	44.724	50.8538	32.7819	28.9586	44.549	28.7307	59.5357	49.0653	79.0307	79.1763
ST3GAL2	16.1794	9.6214	12.3118	8.9195	6.7647	14.874	12.26	17.6683	5.0803	9.9218	6.5019	17.2097	6.3243	7.2765	6.547	7.6323	6.7953	19.9166	8.0384	4.0215	15.4269	14.9701	6.5555	15.1789	9.7683	12.7051	6.5667	6.8727	12.4475	13.8534	10.899	10.0899	7.0518	12.7233	11.8847	13.9206	8.3051	12.69	15.1498	12.7462	12.6907	17.2075	5.9664	8.0036	13.6859	17.777	23.4263	9.4431	15.2573
ST3GAL3	0.2199	0.1618	0.2833	0.1734	0.241	0.3373	0.2433	0.234	0.1052	0.3847	0.1523	0.1169	0.2158	0.0722	0.1577	0.4695	0.2184	0.4005	0.14	0.068	0.2343	0.185	0.1836	0.2457	0.1377	0.0828	0.2483	0.0938	0.1169	0.5251	0.2069	0.2428	0.1716	0.1746	0.2675	0.2144	0.1443	0.2825	0.3018	0.1914	0.1565	0.3804	0.2029	0.1349	0.1029	0.2449	0.1884	0.1091	0.2932
ST3GAL4	27.6602	8.3598	15.706	12.9688	39.4215	28.9604	14.6732	21.9807	23.7584	28.9097	83.3517	34.34	11.4254	10.736	14.5584	6.2487	9.062	26.4214	14.9301	4.8691	27.3599	14.9763	20.2641	28.6525	17.7073	23.7552	15.2697	47.5357	7.5944	22.957	24.17	27.6351	5.8866	62.8078	23.2398	43.4305	62.166	38.8804	25.3316	25.7758	15.5975	25.6443	5.4096	19.0304	12.9068	31.6225	18.9462	14.8531	12.3588
ST3GAL5	7.2906	2.6112	3.615	5.2099	1.5979	5.5769	3.589	3.6545	2.8666	4.4748	3.8289	3.8402	1.8652	1.3752	1.9824	4.4771	5.115	6.4258	1.8555	2.0507	4.2629	6.5616	1.6253	4.837	2.54	5.8211	1.4518	3.7302	0.2972	4.6683	2.4278	4.5738	2.4212	3.8607	4.1201	9.1619	4.7384	3.3493	3.2685	3.9196	4.0719	4.8715	2.8621	2.2253	3.1581	4.507	6.085	2.421	4.472
ST3GAL6	6.4386	5.4641	5.4449	5.0804	3.8856	3.6436	4.9938	4.3701	4.724	5.9085	3.5188	6.5511	4.0864	2.37	1.0315	5.3948	1.4978	7.957	2.4847	2.4916	9.2339	2.3772	3.4662	7.9121	2.1031	4.5491	4.0963	4.5745	0.0943	6.5558	1.6984	4.6329	5.5971	2.8657	3.4937	3.865	2.5045	9.9443	5.1332	4.1924	5.9991	5.7944	5.5919	3.7885	5.1458	4.191	2.6649	3.6668	4.6454
ST6GAL1	36.714	6.7708	15.7401	20.3108	9.8816	28.7128	26.4162	34.4469	10.3187	24.3515	13.1686	51.2666	23.2501	6.43	11.0607	4.7732	34.3543	14.5326	15.3926	15.6938	40.425	51.0668	10.0112	15.5525	13.6366	19.1993	7.5927	19.8537	0.6832	34.4156	23.155	25.8267	5.9209	25.7145	37.0814	15.0874	52.8312	29.2345	26.0561	20.8209	36.0949	23.1449	13.296	12.7982	14.9056	20.8786	18.9607	32.7654	18.1546
ST6GAL2	3.785	0.7523	1.587	0.8674	1.5949	2.2532	4.018	3.6504	5.1701	0.4052	1.9064	10.3444	0.8582	0.6735	0.9639	0.268	1.5873	7.7276	1.2366	0.6092	3.225	1.3897	0.9182	4.2392	2.3165	3.906	1.1905	1.5317	0.0385	1.0341	2.5907	5.8928	0.1337	5.8085	2.3876	1.9611	2.2474	0.9617	5.8769	9.7976	4.197	10.1657	0.3647	1.4842	5.3808	2.6364	0.9594	0.6459	2.7995
ST6GALNAC1	18.3395	1.6892	21.3101	48.4809	59.5022	9.4939	10.3389	37.9369	10.5781	52.9762	106.434	87.7258	20.2644	58.2707	108.243	1.099	98.0674	11.9808	105.077	4.4878	89.3734	27.7753	48.891	11.691	178.174	27.9874	103.129	87.2776	568.474	60.5831	72.2002	94.3759	156.117	70.6121	37.2531	77.4167	40.4656	44.016	68.3417	56.5763	67.1213	4.9559	32.9786	41.0387	18.3975	11.1702	115.827	81.0161	123.957
ST6GALNAC2	5.1464	1.0685	1.0891	1.1231	4.5301	5.4161	3.1702	1.8347	3.4346	4.0964	3.8713	1.3249	2.9873	2.4414	1.4535	0.333	0.7843	1.3431	3.6288	1.3225	3.332	1.3314	2.6079	1.4747	1.0781	1.4659	5.1481	1.9128	1.2843	3.1529	2.5097	2.4216	1.7659	2.4703	5.8736	2.8867	2.8282	2.5565	1.7106	2.6345	3.1613	1.3554	2.7598	2.959	1.7637	3.2173	3.0057	2.8411	3.9739
ST6GALNAC3	5.6328	2.4034	5.8832	1.4897	0.5327	2.7797	1.5731	2.399	1.7473	0.7759	0.6895	1.615	0.3704	0.8469	0.6377	1.7558	2.0754	1.5883	1.2124	0.953	2.2897	1.6958	1.485	2.3384	2.8472	1.7339	0.8036	1.838	2.5085	4.5589	0.4057	1.214	0.5785	1.6817	1.7502	1.8972	0.6361	1.9227	0.6103	1.3331	1.5476	3.2483	1.5454	0.8678	0.987	1.3331	0.8372	1.6579	1.046
ST6GALNAC4	28.4214	28.5582	40.0422	18.3618	22.0897	52.4538	28.7937	27.1255	17.9323	31.1367	22.7273	26.9381	29.7601	29.5059	25.8437	38.6763	33.0227	29.4784	42.5171	15.8407	19.9389	42.6853	24.1674	37.7638	23.735	31.96	81.7465	26.9449	96.6447	31.9746	31.3094	32.3054	12.5091	19.8995	27.4458	21.5044	56.4047	21.3968	25.702	21.9679	38.8996	33.4122	23.9554	40.1775	25.8068	25.0464	19.2215	37.1972	20.4554
ST6GALNAC5	4.5874	2.5248	3.662	1.3676	1.2808	8.2791	4.1531	1.6896	12.236	1.8148	1.6138	9.4087	1.4486	0.9173	1.3819	4.6528	4.5452	11.691	3.2765	1.9446	5.949	3.9975	2.0984	14.613	4.9914	7.2366	1.0495	1.8866	0.2774	3.7204	1.8954	4.0373	0.4537	14.9044	3.1328	5.2908	4.4638	0.9356	7.1282	11.9778	8.3634	29.1613	2.222	2.1214	6.2724	3.253	3.583	2.061	4.2708
ST6GALNAC6	0.3899	0.1395	0.3461	0.1077	0.1448	0.2959	0.2026	0.1579	0.0308	0.0858	0.0421	0.0357	0.2037	0.023	0.0889	0.4898	0.1664	0.2763	0.2161	0.0724	0.1338	0.1807	0.1888	0.1721	0.1472	0.1921	0.2882	0.0506	0.5402	0.352	0.1378	0.19	0.074	0.0653	0.1997	0.0246	0.1161	0.1808	0.1555	0.0877	0.1462	0.244	0.1301	0.1902	0.1995	0.1153	0.0895	0.1	0.1322
ST8SIA1	0.8953	3.024	0.4971	0.2999	3.1512	1.4798	0.9096	0.8846	0.4464	0.2291	0.2045	0.5688	0.2767	0.1687	0.0489	1.1366	0.54	1.5818	0.5938	0.6131	1.0952	1.6006	0.1297	0.4755	0.5548	0.7189	0.1723	0.5521	0.0751	0.4643	0.5505	0.5019	0.1118	0.3685	0.4524	0.171	0.156	0.2108	0.3419	1.0386	0.3585	0.7407	0.429	0.9758	0.8815	0.4104	0.2342	0.1944	0.3997
ST8SIA2	1.179	0.0527	0.3579	0.6447	1.2477	0.6159	0.6342	0.7573	1.0491	0.7897	0.6781	6.3779	2.0222	0.3654	1.2096	0.0456	0.2803	7.425	0.2083	0.0876	4.8969	0.4099	0.1713	1.1051	1.8695	0.5137	0.7293	0.211	6.8442	0.2342	0.9878	4.3448	0.3356	2.5708	0.3294	3.8203	0.5969	2.3852	3.3858	5.4871	1.4386	0.6007	0.1602	2.6918	2.7756	1.9349	2.5629	0.2372	1.9043
ST8SIA3	12.7066	33.8717	22.7267	3.8582	8.9975	2.8187	6.3122	4.9754	0.1585	18.2013	6.7434	4.8523	2.9448	4.2772	2.1247	29.314	5.5957	1.58	0.9372	3.2667	3.1761	5.7838	3.0211	1.2592	0.5621	7.2101	2.3624	5.0994	0	11.8822	0.1984	3.1404	0.4232	3.8735	12.0675	4.0455	0.4974	1.7148	2.1761	0	5.6657	6.4612	8.7893	1.4536	0.5926	1.8922	4.1465	3.4666	8.0037
ST8SIA4	15.1503	6.617	8.3469	3.7601	2.5965	18.5426	11.5769	7.3263	8.0028	4.1811	3.5476	13.5281	2.7926	2.4158	1.253	3.0371	4.7093	8.9385	2.9633	4.8527	8.9705	9.2502	3.3272	13.1419	3.6856	8.1202	2.5347	7.1101	0.2278	7.1261	3.4083	6.711	1.0556	7.8958	8.2268	4.8709	3.2781	4.5659	3.8501	4.7442	7.4188	11.364	3.5857	3.842	5.5125	6.0698	5.0456	9.7215	7.5793
ST8SIA5	0.0924	0.7832	0.1828	0.0401	0.0147	0.0766	0.0137	0.0649	0.0261	0.0913	0.0606	0.3081	0.1096	0.0117	0.015	0.2169	0.0295	0.0702	0.0046	0.0327	0.0793	0.102	0.028	0.0224	0.0463	0.1301	0.036	0.0171	0.0189	0.1192	0.0513	0.044	0.0188	0.0221	0.0246	0.0249	0.0262	0.0556	0.0351	0.0495	0.0457	0.1298	0.1384	0.1073	0.1314	0.0167	0.0346	0.138	0.0895
ST8SIA6	0.791	0.9782	0.7022	0.1699	1.0225	0.654	0.3654	1.4664	0.139	0.3316	0.2927	0.3218	0.3872	0.0519	0.0167	0.4152	0.6608	0.2465	0.6088	0.4473	0.4274	0.3056	0.1153	0.3283	0.4108	0.2659	0.0798	0.4787	0.014	0.7406	0.1761	0.4808	0.0903	0.2944	0.3956	0.4336	0.0969	0.2469	0.1558	3.9081	0.3887	1.03	0.6284	0.0191	0.2416	0.4146	0.1057	4.1369	0.2608
STAU1	172.04	62.0916	101.072	81.9799	199.363	104.454	105.58	138.276	254.944	138.921	152.841	189.232	97.0971	108.264	168.716	49.0971	138.068	93.9426	188.749	58.2692	159.592	77.8861	53.8036	106.16	148.805	91.434	159.846	122.589	166.328	169.957	177.939	116.599	150.134	277.799	129.82	146.945	140.504	141.083	127.513	135.792	119.417	106.118	96.6193	120.075	114.773	217.478	190.883	136.789	124.978
STT3A	103.003	45.437	66.6216	41.5673	71.0563	57.1792	56.5559	83.5002	113.8	80.7474	76.5433	119.679	60.7974	69.2652	80.3866	25.9745	89.2418	58.0613	67.5553	28.8851	93.6281	47.3174	41.1021	63.5758	67.3308	72.9162	65.0149	61.6837	60.1021	67.6021	61.5042	55.7993	73.6517	115.522	61.9384	71.7704	66.5104	54.215	61.0742	77.1673	63.5261	57.0066	49.2486	57.1947	61.2894	83.4852	64.5647	86.2411	63.4823
STT3B	227.979	45.5551	104.065	53.0033	174.815	106.444	105.507	140.088	146.3	133.329	115.453	150.501	91.9606	88.4546	67.6115	69.9207	166.29	85.2851	111.398	49.581	145.757	90.4592	60.9291	108.704	114.127	100.978	103.969	100.577	102.908	160.365	110.92	81.2375	89.2287	146.725	127.9	99.5441	148.855	110.607	108.312	100.335	89.6852	133.632	68.2496	118.606	74.5546	129.371	159.631	143.017	107.151
STX17	20.8105	9.4271	14.39	7.0152	10.9404	12.0142	11.5598	8.0073	20.8615	14.5581	13.4732	16.2893	15.7436	7.6483	10.6525	10.791	18.739	9.4084	10.1891	8.3637	18.3433	7.9649	7.7375	10.7786	11.633	8.4488	13.7557	10.4959	11.4035	19.9275	13.9204	13.1526	14.3644	24.3644	14.747	9.5849	9.3656	14.2578	11.2051	15.782	12.5241	10.5286	12.1407	6.139	10.1263	19.5465	11.472	12.7389	15.9452
STX5	78.0683	54.7691	49.7034	44.2539	67.5252	61.4703	50.1479	63.0048	75.4676	62.4009	51.4521	73.1346	56.7146	43.4382	53.7056	38.7706	58.244	57.5714	66.495	26.5982	59.3516	66.0355	32.8262	61.6112	53.2226	87.9805	26.6262	67.7479	56.8248	64.453	86.249	57.8333	48.1996	77.5813	59.397	60.9274	56.469	69.3808	54.618	59.6925	54.1553	55.8935	42.1261	81.4031	56.4209	54.4728	59.3884	65.2992	49.7202
SUCO	41.0472	26.3493	69.9019	10.4319	40.7814	20.0469	23.9622	16.7452	58.5684	22.1969	19.6911	33.7809	12.996	14.507	32.2391	24.9985	25.7627	15.2187	15.6703	18.5385	57.0879	12.5464	17.5182	15.0261	23.1068	13.2775	29.1525	22.4547	26.6499	32.547	15.3264	14.3715	26.0351	36.8215	23.8014	19.2317	17.1047	26.2824	28.6688	36.3417	18.0028	19.1416	23.3896	8.8573	23.088	42.6231	29.1857	28.3809	36.9696
SVIP	26.0714	18.7984	52.1263	12.9106	15.7772	35.7023	15.5899	12.2704	25.0163	29.5367	35.0541	20.3742	10.1133	13.2346	44.1477	27.8961	58.8514	14.2891	19.4848	14.2657	42.0035	14.5241	19.5803	13.5244	30.2756	22.0201	12.505	19.6151	29.1581	28.3753	21.3073	20.1295	20.8102	32.4743	23.5834	16.95	41.8909	30.0147	36.972	25.5222	11.9695	17.8631	29.4793	7.8668	18.2339	38.9887	23.9489	25.5789	26.6814
SYNE3	6.9488	2.333	5.6446	1.2113	1.8654	6.1184	4.4018	2.5181	1.6669	1.1033	1.4827	3.785	0.7773	0.8642	0.6882	1.0971	1.4907	4.601	1.3021	1.7909	3.1575	5.6814	1.0034	2.6152	1.8339	3.321	1.6441	1.9441	0.2776	2.9003	1.937	2.7168	0.4594	1.7666	2.7478	2.1451	0.8444	2.1126	1.4135	1.3574	1.988	6.201	0.8036	2.0599	2.102	2.0595	1.3521	1.8086	2.0234
SYVN1	55.4154	54.0065	44.8114	42.1922	55.4816	53.1427	46.9387	48.5582	66.834	58.1389	45.5024	65.6761	59.6671	40.7694	52.5594	39.478	44.6693	41.3076	46.3274	21.5589	55.0188	65.9129	51.837	49.1698	53.1279	40.9416	29.5898	32.922	50.3025	71.891	57.5066	53.1499	53.2036	50.8664	51.8675	53.1569	42.8022	70.0222	54.8521	52.0949	47.3693	41.7805	37.4959	31.5104	47.6318	56.046	40.8535	51.7551	48.3527
TBC1D20	47.9634	32.8929	37.4172	22.8844	31.7705	31.2648	27.7295	21.9166	43.6351	30.2471	26.1084	46.6571	26.0266	18.6135	26.0539	33.3744	33.6084	35.1845	12.066	14.169	34.9165	26.1465	15.5581	29.6121	31.7575	24.976	26.0659	19.8492	43.5113	38.3612	27.7713	27.5844	13.1884	42.0765	27.8084	32.0802	29.7833	21.6939	30.3561	32.927	27.5312	41.347	18.7401	22.0231	30.1378	46.6682	19.7781	38.0603	29.7618
TET1	1.6647	0.1989	0.8523	0.2438	1.0551	0.4229	0.8671	0.791	1.0812	0.5618	0.2848	1.4778	0.311	0.3622	0.3067	0.2981	0.9317	0.982	0.6338	0.3109	1.2131	0.1497	0.3453	0.4386	0.5573	0.3797	0.3685	0.2568	0.1851	0.9199	0.4642	0.5189	0.1889	1.1825	0.5513	0.4542	0.2992	0.744	0.6106	0.9841	0.3726	0.8595	0.4823	0.126	0.5019	0.7775	0.4235	0.6496	0.4472
TET2	11.4422	4.2648	7.1826	3.6146	10.3398	4.9685	5.9108	5.5528	6.0252	5.7506	4.6737	8.7834	4.4399	2.6953	6.3783	5.6597	8.3686	5.3345	3.6718	3.3766	15.7363	2.9744	3.2087	7.1063	4.5624	3.0655	5.7167	2.5214	5.4849	10.047	3.4811	5.1697	5.4139	6.8448	6.7027	5.0032	5.4905	3.351	5.9392	5.4502	4.9999	5.3439	4.6969	1.6585	5.6959	8.2874	6.1443	5.581	6.8848
TET3	11.3537	1.8951	7.3944	4.2706	15.8411	6.9262	7.5498	5.9325	6.3685	6.5591	7.554	13.5744	8.0702	6.361	7.1791	3.1501	9.234	5.6382	5.5252	2.8423	16.327	3.876	6.089	7.7651	9.4809	2.576	6.4219	4.2684	8.5075	12.859	7.6659	6.8799	8.7363	12.8943	8.9828	10.6939	5.937	6.2826	9.2513	9.8317	7.9381	7.8124	5.2165	3.8937	8.5721	13.2273	9.7802	7.8052	13.6821
TFG	33.4463	8.4987	24.9105	18.5979	31.7753	21.3055	22.7741	23.1243	64.7608	37.1483	33.9622	45.2734	24.0117	21.8037	38.4629	15.1551	32.1498	28.9426	26.7526	11.525	40.0325	19.3598	24.1179	25.3567	26.4306	25.6999	26.2969	20.7712	24.3319	29.3099	29.0312	28.8174	31.9255	28.0299	30.2577	28.9921	27.1373	30.2412	26.8118	36.0926	25.6519	27.1261	23.092	37.7114	31.2275	30.326	27.8597	20.1297	27.5047
TGFA	42.5862	2.6596	11.9613	17.0384	88.8176	37.6516	26.3102	32.2408	39.4255	49.901	47.3855	35.1479	32.0793	25.7994	22.6653	2.7108	42.3013	12.5426	39.5588	8.2915	29.1181	14.0136	15.2469	18.207	27.7347	13.9271	20.4466	26.8164	4.6846	53.2404	34.5284	22.3713	24.5078	59.0729	35.8409	50.1827	32.5993	30.1343	30.4729	31.8847	29.8252	7.4225	25.6958	58.1662	19.9452	41.5428	59.2602	48.7428	39.9611
TH	0.065	2.4046	0.4966	0.0898	13.4535	0.4937	0.1352	0.1506	0.0257	0.3682	0.1756	0.0893	0.08	0.5952	0.1112	0	0.1322	0.144	16.267	0.0671	0.2047	0.4021	0.1969	0.1767	0.8069	0.2868	0.1012	0	0	0.9005	3.0354	0.6672	0.3395	1.5251	0.2423	0.041	0.452	0.329	2.9403	0.0487	0.8631	0.1938	0.4341	3.7656	0.7398	1.6761	0.2773	0.0128	0.2206
THBS1	569.565	180.858	205.155	52.0054	125.962	826.181	389.185	377.173	1233.82	109.258	61.9994	621.114	71.2211	221.583	59.9701	54.871	67.571	325.753	124.118	219.54	264.164	257.083	48.8571	588.839	165.592	409.515	92.06	188.568	11.8636	137.663	103.268	487.487	15.8813	764.068	353.575	268.801	94.9233	471.867	248.3	367.443	293.409	1193.59	29.8435	152.622	95.8452	259.314	151.374	161.238	132.717
THBS2	208.073	19.8502	97.1807	31.325	70.1603	88.4026	95.9198	122.022	457.245	67.8052	48.7548	573.879	16.9589	41.9057	67.0031	3.2226	22.1411	349.257	69.9664	44.4462	406.884	38.652	52.2313	306.505	55.752	77.8205	57.2187	29.1033	1.8681	119.106	76.878	242.629	19.315	423.501	85.6694	276.47	161.84	69.5186	219.391	195.213	230.968	289.275	5.3996	14.8204	133.413	247.193	90.9558	319.425	145.429
THSD1	9.2706	6.976	5.612	3.9024	5.4747	8.6772	3.9619	4.3789	2.3191	1.8615	3.5892	4.5751	4.0857	2.6541	1.2732	10.0553	6.389	6.3317	3.0563	2.1201	3.802	4.4013	5.2234	6.6003	4.8193	7.793	2.5202	4.7075	0.7471	6.2858	3.0009	3.4659	0.9804	3.0865	4.9412	2.4269	3.2341	3.6485	3.4897	4.3529	4.1724	7.4046	3.5273	4.4682	4.7636	2.194	2.4537	1.5861	4.8298
THSD4	34.6271	2.2902	9.9604	6.0694	9.9212	19.9265	18.6766	10.921	7.3888	16.5325	9.6387	17.6514	4.5341	4.6163	6.0541	5.3318	15.3848	5.4044	6.8968	6.27	21.5566	11.1498	4.9711	7.4809	10.4501	11.8064	4.3253	10.42	0.387	40.0349	18.563	13.9886	4.8816	17.7149	17.2787	13.0461	9.3776	26.4764	7.3766	6.4527	17.1745	11.6433	6.9316	3.803	8.0239	16.6124	10.1825	13.7729	17.7796
THSD7A	10.1174	2.6547	21.1513	2.1716	1.2523	8.6367	4.3277	4.2594	3.8289	1.4478	2.2716	3.3037	1.6947	0.7326	1.2202	1.2815	5.7364	3.7507	1.8966	3.2015	4.1243	1.9104	2.3857	5.8875	3.5816	2.3637	1.5183	2.0393	1.8738	4.0711	1.5003	3.4692	0.5798	3.2619	3.6526	1.6168	1.7492	2.3557	1.6541	1.8033	2.1042	5.3007	1.9779	1.4049	0.9427	1.9088	1.8574	1.192	3.1084
THSD7B	3.2231	0.4105	1.5972	1.3184	0.8408	1.9537	2.5286	1.266	0.5809	1.4433	1.8096	4.5794	0.1599	0.1897	0.7151	0.6702	0.2052	1.5042	0.1696	0.5556	2.8359	0.3546	0.5372	0.7586	1.6834	0.9445	2.476	0.8889	0.0146	1.1235	2.5962	2.723	0.9727	1.5067	1.1257	1.4261	0.3949	3.9078	0.5831	1.4906	0.6444	2.1881	0.3865	0.8559	0.9222	2.3461	1.4247	2.3114	2.5036
TMCC1	26.468	7.0189	18.8418	8.4197	31.3354	12.805	14.5488	23.526	23.7506	20.6999	19.904	40.9369	30.0115	11.3027	23.9543	9.1967	15.7216	12.6905	19.0314	6.4838	30.4809	10.2744	9.4739	12.8831	15.1187	9.437	17.1313	14.4682	12.4031	22.2207	24.8081	16.7248	15.3083	21.1801	15.0011	15.8928	16.4152	20.4362	15.1666	18.0643	18.0498	15.6208	13.4166	14.7688	13.1859	23.0113	19.374	18.0825	17.8066
TMED10	328.044	190.842	189.274	137.991	417.959	176.581	201.307	367.332	359.814	262.916	162.109	464.084	206.965	245.513	277.6	152.051	253.075	178.559	252.881	119.388	396.683	172.889	148.489	224.62	188.528	233.74	446.285	231.381	381.118	234.807	248.535	192.584	120.644	324.435	231.609	234.924	232.257	232.385	227.192	266.587	228.017	234.744	165.062	134.087	203.568	287.982	273.997	239.713	213.667
TMED2	269.748	174.24	197.815	94.7783	239.097	177.485	185.251	289.839	512.456	175.184	169.765	293.973	179.341	171.517	215.495	131.274	270.851	176.484	204.892	112.624	305.433	135.201	134.003	196.29	199.087	221.811	249.102	203.811	301.377	199.108	130.437	142.798	208.162	272.143	189.991	216.157	132.512	125.617	196.698	208.151	166.089	183.791	181.527	172.617	186.514	222.15	160.18	267.06	182.187
TMED3	18.2971	21.4259	17.4453	17.8686	33.2058	20.9243	17.1418	13.8157	23.7401	27.5172	41.06	24.0682	24.7818	27.7523	25.156	39.2363	27.4906	19.1082	14.328	12.7194	26.031	16.6889	15.8795	18.6055	18.8927	30.57	31.6284	32.7279	27.1632	20.0478	46.6251	16.5807	40.16	21.7775	18.7415	19.7386	17.258	23.7556	18.2282	27.4468	16.3229	18.1777	18.6029	29.0283	18.207	19.3896	22.3694	20.3338	24.0928
TMED7	119.215	64.3926	94.199	26.7909	83.6916	66.7291	63.1565	84.1829	230.617	77.8865	84.0934	177.858	58.8656	38.0014	110.981	79.038	87.5735	57.4907	60.1456	37.1844	122.71	29.1161	56.6533	75.7287	76.7556	61.8996	91.9666	56.8947	84.2077	83.9378	53.8282	45.3424	51.4097	137.04	78.2942	53.9089	90.3041	69.2305	75.4391	100.844	52.1211	78.6776	55.7855	20.5618	67.7094	124.329	78.2151	94.7703	71.0182
TMED9	186.946	261.19	146.848	168.514	186.734	184.685	140.505	338.735	308.801	320.31	313.342	278.835	256.329	292.621	202.091	170.418	202.361	251.252	208.582	72.7548	188.782	202.423	161.987	258.917	225.91	256.544	249.82	214.754	360.854	173.25	269.791	183.825	258.408	209.496	196.628	249.721	259.032	221.588	178.959	209.587	223.915	200.445	124.152	243.434	206.752	200.562	226.894	254.063	215.512
TMEM115	62.3588	79.8067	58.7735	61.0529	58.6728	68.6177	55.1976	58.0486	50.2165	69.6362	79.6608	58.9216	46.185	64.4969	44.665	106.279	58.8867	75.9801	85.0031	25.752	65.62	87.8654	49.938	74.2721	62.4456	76.3622	64.0278	68.7184	68.9721	94.4542	96.6163	66.5365	58.8235	57.892	74.4026	101.678	61.8091	86.2583	91.2631	58.0689	68.0435	78.0644	55.1903	77.9623	73.2658	72.9691	65.0731	75.4192	74.1046
TMEM165	46.2678	25.5299	32.5137	30.8683	55.0517	37.9987	29.913	46.8624	41.9251	67.2077	71.6182	56.9956	36.1058	33.9005	40.2754	17.6638	47.0021	39.8247	37.6142	14.216	84.7751	24.8156	40.7881	48.3555	33.0373	48.0099	56.1899	47.1173	48.8829	43.6102	44.9806	33.315	60.556	44.1816	49.9674	57.049	36.81	60.9284	42.7527	54.4333	40.6578	46.8321	34.0199	37.5144	31.5437	72.412	57.456	36.9117	54.0273
TMEM199	7.761	9.4712	6.2206	4.8385	4.1458	4.8025	4.5878	4.2546	7.9156	4.3529	5.6989	5.089	7.2406	4.287	3.5956	13.5367	4.0763	4.3618	5.8637	2.1631	4.8035	5.2777	3.668	5.0094	4.1491	5.8859	6.1442	6.1682	5.9199	5.1084	5.4231	4.4112	3.7791	4.1501	5.1357	5.0307	2.1177	4.1893	4.8072	5.9185	5.0797	4.76	6.155	6.5391	4.4003	5.627	5.1339	5.7467	5.6183
TMEM258	55.253	26.7394	37.1051	48.0801	46.4435	35.5799	36.4447	45.7064	65.3684	44.1021	44.6339	53.8931	52.3761	51.2272	44.3103	26.5112	44.173	46.7997	51.9498	21.0266	48.1832	48.7347	33.7945	47.6979	40.5363	66.9538	34.8925	67.6304	53.4075	28.8115	54.8016	40.6839	57.8292	70.5877	42.174	43.9099	43.1887	37.5497	41.892	51.6736	43.9227	44.8271	40.8349	78.4742	36.5161	36.4	47.0405	42.6357	40.2729
TMEM59	134.512	103.224	126.26	90.6773	92.0496	129.177	109.147	104.376	140.45	160.179	133.208	135.085	107.921	71.2101	88.4131	162.364	174.346	82.9632	93.7286	65.5825	162.624	106.62	67.5116	91.2534	93.2761	129.508	74.5369	123.697	153.179	153.957	147.575	131.587	130.684	132.347	118.933	159.071	150.368	174.278	129.775	105.087	121.35	103.839	107.519	104.859	100.338	140.275	170.647	112.853	135.014
TMEM97	55.9022	9.8772	20.8825	36.6609	24.684	15.5179	82.9567	15.7792	60.7369	42.9848	37.351	13.9993	31.1824	122.424	52.7047	8.3279	66.821	14.5168	46.0015	204.809	27.9063	26.1178	12.5304	16.29	36.9387	20.0452	58.0683	110.959	49.1768	66.4582	28.6198	22.8448	97.0316	43.3488	77.2074	22.7125	11.4781	22.867	23.9186	42.3018	59.8498	10.8608	46.3185	16.795	15.8475	47.403	38.125	29.3559	54.2361
TMTC1	14.1973	9.0966	13.1894	1.6738	1.4654	9.2627	7.7424	5.2931	3.0823	2.3622	2.5652	5.3022	1.1524	0.8154	1.8717	4.9663	3.6515	3.5641	1.2449	4.5363	5.3579	4.1218	2.3592	5.9113	8.164	5.1617	2.0177	3.3447	0.6263	6.4302	10.5131	11.2661	0.7556	7.4589	6.5959	2.1747	1.2173	4.283	1.5553	2.5034	2.8784	9.587	2.6302	2.0673	2.6929	6.031	3.207	4.3419	3.7941
TMTC2	21.1479	2.09	9.0879	4.7239	18.1581	11.8877	9.8131	21.6364	28.8661	14.6345	19.8711	12.6862	7.9398	4.0581	14.3252	2.6424	21.3583	7.652	8.3096	5.1754	15.2679	4.2355	8.9773	7.2693	21.6946	5.2101	11.7795	7.731	12.745	17.0283	7.2418	9.0659	15.2276	15.1719	14.1352	19.1563	9.7322	10.6249	12.0862	11.5889	7.4366	9.496	8.6567	2.6844	12.3273	17.0232	10.3601	16.6313	16.6204
TMTC3	21.4246	10.0016	13.9231	4.5861	8.7245	11.7889	11.2131	15.5653	33.851	6.2606	11.1717	27.5419	5.9115	5.1682	5.5368	11.67	14.013	13.6074	5.0277	5.7857	14.8715	5.6949	6.5819	12.4006	12.0477	8.5991	10.7112	6.1378	5.2081	13.9209	5.5607	7.836	5.9356	14.3966	11.5723	13.1789	7.2704	6.963	8.3226	15.9368	8.4557	18.1491	6.2124	8.1007	12.3651	13.0506	7.6574	16.4025	9.9846
TMTC4	20.1122	3.1809	16.507	6.2154	19.5529	9.359	8.5552	6.2016	3.9334	12.3817	13.9047	11.1925	4.1892	9.5507	8.3955	5.1398	14.3582	7.8897	6.8028	4.786	13.901	5.5326	10.2701	7.5037	13.4955	4.5553	14.9256	14.1144	20.151	22.9226	6.1531	12.8016	16.9268	15.8874	12.0771	8.0975	12.8006	14.5527	19.291	19.5785	13.3465	7.8305	11.0799	5.497	12.0542	12.0126	16.3465	8.1257	17.7331
TP63	1.1989	0.066	0.2259	0.8023	7.1501	0.4447	1.179	2.6335	15.6023	0.7221	1.5838	9.4963	7.6877	4.4425	0.2365	0.4456	1.4673	0.3676	36.1461	0.371	8.3174	1.2612	0.268	0.5356	0.0224	4.6642	0.4736	1.1194	0.0661	0.433	3.5992	1.0713	0.256	0.7321	8.6961	1.2632	9.2375	3.4166	1.5571	1.2648	0.5666	1.0139	2.0968	32.0053	3.0284	3.5236	1.0613	0.3438	0.434
TRAK1	37.944	18.9984	35.5926	31.9208	55.7941	31.8148	33.2898	32.7802	30.0601	44.279	70.1593	45.8271	62.1536	23.9634	36.1034	38.2878	67.3091	27.0185	48.9719	12.6739	72.4946	36.1375	26.7771	22.7162	105.722	24.6744	38.1558	37.957	30.2832	62.9677	71.6645	45.6286	116.025	72.579	41.5427	66.2427	58.1931	57.4026	63.9315	41.5715	46.2008	30.8677	41.68	40.6237	38.6247	38.899	50.0822	47.4858	93.0711
TRAK2	59.0145	11.0878	27.4882	18.8717	21.0891	30.3596	36.0413	22.3984	26.5871	23.9625	18.2876	49.7802	10.7809	14.5377	12.0662	12.2722	36.5682	21.751	12.7109	15.2109	34.7516	18.6227	17.4326	22.9527	25.9542	17.9011	29.0872	21.3348	26.517	43.2477	25.4986	15.0943	10.397	24.6573	29.2418	28.0791	19.6868	24.2741	27.1581	27.8121	24.6736	32.3423	17.4271	9.5803	24.8519	34.0155	24.8767	34.2279	30.7761
TRAPPC1	133.819	70.3765	84.8903	117.369	125.911	139.164	101.43	141.002	130.956	102.239	117.14	131.33	118.46	110.417	58.7139	159.301	108.074	147.355	111.513	44.6226	113.118	183.492	98.3584	170.364	165.632	164.623	103.796	150.089	127.226	115.181	119.935	113.331	130.071	118.134	131.241	145.337	103.847	105.829	108.378	121.832	117.488	138.673	114.55	160.623	121.127	98.9001	107.412	118.034	158.732
TRAPPC10	12.1367	2.5807	9.6089	3.792	14.8316	6.3696	6.4472	7.3888	5.2654	7.2519	8.0368	15.6415	3.1825	5.0697	8.516	5.5989	8.9008	4.8843	6.9265	4.1187	10.9054	3.5651	5.7856	7.6556	7.7411	3.2243	9.9008	3.3903	5.4927	10.9628	9.2055	8.3428	7.9721	9.4759	7.377	7.8127	4.6637	6.0568	6.9823	9.3424	8.2106	8.6767	2.6987	2.4889	8.142	14.2689	7.6692	9.841	9.3803
TRAPPC2	9.1141	11.1915	5.3476	5.6333	7.7877	10.5285	7.4221	6.519	5.7885	7.9907	14.2452	5.5358	8.7483	6.4607	7.4733	9.7453	8.1859	9.1532	5.8795	3.2925	10.2732	8.3902	4.3689	7.2491	6.1491	5.4045	7.0384	9.6312	9.5185	10.9918	9.5462	7.2291	9.7737	10.872	8.7092	6.5935	6.8617	9.1109	7.7179	12.1629	6.5092	6.8847	8.0672	5.2452	7.4851	9.8111	8.0984	4.7578	12.4676
TRAPPC2L	33.6279	31.2363	26.8912	33.6379	27.0627	34.3818	19.0835	38.6325	33.7001	20.221	38.0338	37.0895	22.7732	36.717	26.8206	29.0446	23.6838	31.6408	37.6573	11.0289	30.5286	29.4634	26.7615	30.9704	37.1073	40.8369	37.8388	35.7971	14.664	29.2723	22.9622	22.6258	21.6667	31.8345	21.5245	25.6072	28.1831	26.9271	22.9092	35.1282	27.2289	28.7598	24.8511	39.0832	22.7782	27.4867	31.3749	30.7229	28.9511
TRAPPC3	61.5597	35.5383	40.3706	51.4763	48.1211	52.595	46.6645	62.3282	46.8428	51.0086	56.7135	49.2414	69.3911	34.4085	28.6887	41.4008	46.5271	56.3541	41.2297	19.6688	55.3443	53.8499	37.5038	53.7335	40.6109	63.2537	35.0774	50.5159	32.7384	50.388	62.5915	44.5777	44.4094	42.8765	46.1686	53.7768	51.2513	54.8186	53.0119	50.43	47.6547	52.106	46.4911	69.8706	46.7041	52.2895	57.1667	44.025	52.8746
TRAPPC4	37.9205	24.4482	27.989	31.0513	16.568	23.4364	23.9158	22.8314	26.7491	56.9614	23.6323	22.2909	20.0237	24.0546	26.1906	26.2896	20.9831	25.7247	24.8585	9.0814	27.2121	30.6015	15.0293	21.889	24.0877	28.1116	33.2752	28.9698	20.6806	31.9055	30.4365	19.9166	30.6823	39.171	25.1451	29.9973	17.8973	30.9198	23.7588	38.0503	21.3353	25.7803	31.0311	27.4693	23.0233	37.5775	32.0942	24.8296	37.4658
TRAPPC5	0.7166	1.7488	0.2393	0.2113	0.8253	0.4067	0.7006	0.2952	0.2017	0.2406	0.2656	0.2001	0.7728	0.1183	0.1661	0.5633	0.3702	0.4357	0.3407	0.0827	0.271	0.3519	0.4963	0.4578	0.7074	0.671	0.241	0.2646	0.1044	0.614	0.3478	0.2897	0.1902	0.1587	0.2884	0.3098	0.2653	0.3839	0.3229	0.4096	0.2312	0.5211	0.2779	0.4503	0.3729	0.254	0.215	0.424	0.2626
TRAPPC6A	43.8369	29.8176	61.3835	119.011	83.0088	69.9052	59.6468	61.0862	17.1027	62.1369	70.067	65.0598	62.9889	108.34	51.9505	58.2168	43.8474	49.4035	130.28	24.8913	96.4885	86.1907	26.3143	67.6339	92.9377	69.2558	94.2969	63.0987	59.867	93.8388	135.869	74.22	94.1201	69.9745	63.8222	328.227	79.0389	115.719	102.018	99.3918	91.0976	54.5135	72.5725	96.0736	67.5951	84.0796	189.202	73.0004	98.1541
TRAPPC6B	4.5798	2.0956	3.582	1.6515	5.2544	2.9347	2.4079	5.5205	4.4589	4.6076	1.5038	5.0764	2.3572	2.4522	4.0325	2.7493	4.2017	2.5067	4.2214	1.9777	7.3511	1.3755	1.8652	3.2244	4.2714	1.2668	6.1795	1.1484	1.5266	4.0112	4.2924	3.067	3.3243	5.4582	3.6773	2.7023	3.7158	3.1167	2.8523	2.8736	2.8836	3.9577	1.6754	1.3658	2.9071	7.5778	4.8491	4.2132	3.8315
TRAPPC9	13.8657	17.0647	16.2276	10.5239	27.8284	13.941	11.2605	16.9649	12.1113	20.096	23.2408	18.4196	9.9208	13.7967	10.7121	25.0776	12.1061	11.9683	20.8884	4.7399	18.2803	15.0269	7.2977	13.2752	13.8933	14.7579	21.7011	16.3415	17.3555	18.6133	26.2666	15.2182	14.23	22.712	15.7278	19.1927	13.7226	20.1248	14.4837	13.9251	14.0949	11.8383	13.4334	8.9982	14.0145	17.893	19.3654	8.5548	25.357
TRIM13	20.4204	4.4953	13.5081	8.1952	16.7217	10.4979	12.4592	7.8383	8.5105	9.5156	11.7393	16.1064	10.5192	7.3403	8.5069	8.9893	12.0069	10.5378	6.1259	4.9197	11.0757	8.9553	8.3626	9.6691	11.944	11.6536	11.6822	13.3634	8.6942	14.2292	13.4894	9.8248	7.8939	10.4524	8.8903	11.0177	8.2375	11.0952	9.8993	15.1317	9.1123	12.1	9.539	7.589	10.7328	10.4992	9.3937	9.1537	12.0482
TTYH1	3.6963	0.7937	0.5974	0.9131	3.1832	2.8347	8.599	0.6857	0.4397	6.4035	2.8285	0.2946	1.3041	3.6273	2.1012	1.1214	1.5339	2.1639	1.4492	3.1813	0.7114	1.5824	1.6118	0.785	0.6233	0.8803	1.1154	2.9519	0.1398	6.2693	0.7861	1.3956	1.9504	0.49	7.3981	1.9993	2.0139	1.2578	2.3858	1.8419	4.2706	1.665	4.9929	1.3893	0.7404	1.6005	1.4486	0.9925	5.5196
TUBA1A	277.599	288.684	212.842	96.8878	74.7292	390.806	237.458	248.473	345.138	104.765	176.465	301.523	97.5251	92.268	40.4856	191.842	109.835	341.203	82.6745	66.6551	252.207	303.471	75.677	239.113	191.994	350.646	80.7464	219.509	21.5887	159.143	178.865	148.87	25.7166	248.633	179.942	357.787	103.59	123.077	212.626	216.651	212.792	362.178	92.8118	182.869	251.334	248.065	93.3524	94.7275	188.657
TUBA1B	117.467	31.8952	78.9189	44.8192	77.413	63.4576	61.2757	114.759	153.265	58.075	63.7845	126.36	59.5806	64.4771	38.2435	54.0214	64.9377	70.8944	88.7745	22.0858	92.7222	75.0157	41.6194	94.6698	71.3016	128.868	114.636	54.8518	106.909	55.6493	82.7058	71.5623	61.1578	118.115	69.5553	93.1408	51.7843	58.7583	56.6764	68.9446	76.2869	99.547	43.6167	84.4857	66.1884	118.746	63.799	72.2541	64.451
TUBA1C	47.9112	5.0965	24.5207	28.0989	46.3859	31.755	27.2102	75.2572	115.157	27.4054	42.8024	51.3031	39.0268	50.5861	30.7405	4.9378	42.413	27.9191	69.3844	8.6167	52.543	30.9946	31.8497	41.4142	42.682	44.1727	68.4029	32.5078	85.0986	30.0865	49.6138	32.4645	43.0573	52.1273	44.0662	64.8055	30.1771	41.9212	29.7083	48.0115	42.3463	40.9707	27.5476	72.6131	54.3792	75.572	61.6581	41.5414	35.0755
TUBA3C	0	0	0	0	0	0	0.0354	0	0	0	0	0	0	0.0402	0	0	0	0	0	0	0	0	0	0	0	0	0.0529	0.0706	0	0	0	0	0	0	0	0	0	0	0	0	0	0	0	0	0	0	0	0	0
TUBA3D	0.702	0.9418	0.4674	0.5089	2.1994	0.7052	0.7867	0.4189	0.0521	0.3725	0.3554	0.4217	1.1733	0.2331	0.3751	0.5935	0.5082	1.2825	0.6839	0.2173	1.0542	2.2374	0.5578	0.894	0.3195	0.1024	0.8705	0.2731	0.1258	1.5845	0.9306	0.4388	0.1873	0.7936	0.6742	0.4974	0.9582	0.3329	0.7583	1.0851	0.6455	0.6667	0.9725	0.4281	0.3742	0.834	0.4747	0.4154	1.4508
TUBA3E	0	0.0813	0.121	0.0376	0.0506	0	0.0354	0	0.0539	0.0429	0.0736	0.0624	0	0	0	0.0878	0.0277	0.1207	0.0944	0.0281	0.039	0.0527	0.0413	0.0926	0.0735	0	0.053	0	0	0	0.0482	0.035	0.1617	0.0457	0.1269	0.0858	0.0451	0.0575	0.0604	0	0	0.0406	0.0325	0.0443	0.155	0	0	0.0806	0.1734
TUBA4A	53.4935	47.9512	52.6488	69.3807	82.0632	82.948	43.5599	134.24	130.008	100.896	145.489	125.761	110.799	155.37	84.5085	78.1398	37.8467	32.6021	134.267	15.1774	143.685	72.5594	49.8076	36.6942	44.3462	76.1305	167.44	72.9749	131.09	53.9485	112.857	42.1186	59.1725	86.8858	64.9398	67.2431	92.6068	151.991	76.2303	59.6668	62.3958	26.6123	81.3469	179.283	62.4795	128.794	188.217	105.386	46.0708
TUBA4B	0.2862	2.2305	0.0871	0.1016	0.0455	0.1643	0.0637	0.3549	42.5884	0.27	0.1656	0	0.2639	0.181	0	0.158	0.0498	0.1086	0.2124	0	3.2278	0.5212	0.0371	0	0.0992	0.1272	0.0954	0.0318	0.0586	0.0738	0.0867	0.0629	0.1164	0.2054	0.1142	0.1159	0.1218	4.1356	0.0544	0.1838	0.1415	0.1462	0.1462	0.1197	3.2083	0.3368	0.4424	0.4354	0.156
TUBA8	0.2273	0.1863	0.232	0.1883	0.0633	0.2537	0.2215	0.1315	0	0.3752	0.2148	0.052	0.3842	0.1006	0.1943	0.183	0.1385	0.2265	0.0197	0.0352	0.1625	0.1536	0.172	0.1929	0.1379	0.1326	0.1989	0.0589	0.1357	0.3762	0.1205	0.204	0.1752	0.1332	0.0794	0.1789	0.094	0.5268	0.2014	0.0426	0.2294	0.1185	0.4468	0.2217	0.1615	0.18	0.2235	0.1345	0.0963
TUBAL3	0.1154	0.0344	0.1434	0.7968	0.1714	0.5152	0.6597	0.1669	0.0913	1.7419	0.4674	0.5281	0.0355	0.3066	1.7759	0.0372	1.4773	0.1533	0.5196	0.2143	0.3961	0.1783	0.0699	0.0392	0.2801	0.3592	1.5264	0.6285	0.3308	0.5557	0.8975	0.2959	0.1095	0.3092	0.2687	6.214	1.2984	1.4105	0.6649	0.9514	0.1997	0.5845	0.8801	0.3753	17.3243	4.2655	3.1027	3.6416	2.3483
TUBB1	0.1869	14.395	0.9955	0.2065	0.3933	0.3616	0.1943	0.1622	0.345	0.5486	0.1682	0.3137	0.249	0.2023	0.071	2.4082	0.2532	0.1656	0.1726	0.2957	0.5168	0.5055	0.0943	0.2328	0.1848	0.3717	0.1939	0.0323	0.1488	0.3375	0.1762	0.1758	0.2513	0.0626	0.2901	0.0392	0.1031	0.0788	0.1933	0.2335	0.1078	0.5569	0.3564	0.1013	0.2657	0.1316	0.143	0.2212	0.5283
TUBB2A	75.9945	48.628	42.4729	33.8045	22.1091	66.8553	36.7583	38.2902	42.9748	40.387	51.4628	31.9088	21.2493	34.8009	24.9626	6.7866	38.6293	49.3834	36.9827	17.3888	62.2346	49.8001	33.8592	41.3258	39.4548	35.2462	37.3915	26.3723	29.4091	79.1556	27.9535	55.0969	93.3131	46.0718	51.1531	81.4458	29.8483	39.9132	27.9082	36.1064	41.4188	60.627	46.8328	50.8176	55.5658	17.8511	72.616	28.3885	45.3645
TUBB2B	10.5628	10.477	8.1849	4.1443	5.3885	48.4828	12.8265	15.5951	4.6459	8.9714	9.9166	5.3764	2.5186	3.7299	3.6572	2.035	4.3529	10.5365	6.018	3.8087	14.3732	11.8608	4.0041	6.1352	5.3775	7.707	3.6483	13.9797	1.6036	14.3197	3.7342	10.405	3.0678	4.2324	12.5498	25.957	0.6533	5.7419	2.8437	6.2147	5.8092	12.5005	7.835	4.7517	9.9922	13.0524	8.1242	2.6868	8.9141
TUBB3	0.5138	0.2924	0.3732	0.4515	0.8498	1.0218	0.6069	1.0676	0.4249	0.9547	0.8577	0.6413	0.8471	0.5377	1.3311	0.6168	0.2088	1.0757	0.3559	0.106	1.0822	0.3068	0.509	0.8566	0.3779	0.2907	0.4179	0.1696	0.0893	0.5341	0.5449	0.5749	0.2216	0.5319	0.4568	0.4854	0.4328	0.7284	1.0764	0.8401	0.3234	0.8628	0.4342	0.0911	0.664	1.0654	1.0107	0.2856	1.1287
TUBB4A	2.6989	0.8621	0.6389	0.4969	0.3579	2.8116	1.7533	0.2975	0.4066	2.5056	1.4402	0	0.0988	0.6828	0.3296	0.1863	0.2089	0.8822	0.4897	0.9943	0.2206	0.422	0.603	0.8729	0.9531	0.25	0.55	0.55	0	3.2102	0.0682	1.4007	0.0305	0.2152	2.0946	0.3642	0.2552	0.1083	0.4841	0.2408	2.1873	0.8616	2.7568	0.2508	1.3155	0.475	0.5057	0.4309	1.5255
TUBB4B	345.262	191.929	248.042	261.132	194.363	383.858	226.293	230.387	797.048	391.354	592.889	321.375	493.864	446.574	205.931	164.046	407.94	163.12	494.05	88.0635	454.699	369.112	398.229	258.76	349.282	336.1	590.876	247.936	1120.27	381.69	503.381	312.074	354.274	237.961	352.821	390.3	296.17	448.039	231.699	279.996	375.643	247.658	359.226	653.424	442.398	423.167	364.289	356.638	408.533
TUBB6	85.1419	46.4397	65.315	28.7549	20.8604	165.518	78.2448	81.362	52.2001	42.5463	65.9967	73.6719	111.728	107.198	13.1966	27.8184	57.3115	131.259	25.187	27.8067	86.1301	129.326	71.4507	123.797	82.0483	94.0714	39.3581	41.5598	6.4468	58.6833	46.4019	50.7606	31.2997	59.6337	59.0929	131.603	33.167	80.7044	57.2853	70.5906	87.2206	197.073	18.8077	130.901	85.2676	81.3173	54.346	63.3406	66.8626
TUBB8	0.072	0.1717	0.0639	0.2585	0.2673	0.0643	0.0374	0.1042	0.0854	0.1585	0.0583	0.0329	0.1992	0.1488	0.2462	0	0.0585	0.0638	0.1247	0.1337	0.2677	0.0556	0.1961	0.0978	0.0777	0.056	0.14	0.0373	0.0344	0.0433	0.28	0.0739	0.0512	0.0241	0.0335	0.0907	0.0238	0.1214	0.2872	0.5935	0.0208	0.2145	0.1201	0.0234	0.2661	0.2129	0.2833	0.1278	0.9767
TUBB8B	0.0422	0.6044	0.2924	0.4899	1.4115	0	0.4939	0	0	0.5977	0.3422	0.116	0.8569	0.0374	0.1444	0.1632	0.0515	0	0.4828	0.183	0.2175	0.5874	0.2301	0.4303	0.2392	0.0986	1.2816	0.5587	0	0.4576	0.5823	0.195	0	0	0.413	0.399	0	0.4272	0.8423	0.4748	0.731	0.3775	0.0302	0.0412	0.5764	0.7761	0	0.3249	0.3223
TUSC3	108.413	71.7636	100.899	16.0431	17.0394	53.0617	43.3153	18.8022	12.85	72.9891	27.2803	33.0071	27.4998	71.3264	30.4486	185.529	26.2638	29.6099	18.6699	24.3229	46.0041	41.6932	16.1102	23.2879	13.7937	61.6401	84.1223	32.4268	0.6857	55.1192	4.8483	25.7033	7.1311	29.2046	99.6947	49.2253	9.4461	21.9286	16.2018	33.7033	26.1978	47.4311	47.8332	11.3195	17.9439	23.1733	23.7774	22.8575	39.9718
UAP1	80.57	29.631	81.0279	37.1615	60.469	88.0006	66.2525	61.5218	140.661	60.92	61.4337	79.9841	34.0866	46.2382	179.076	17.1413	87.3681	50.791	45.9584	43.6468	110.022	63.656	62.6124	94.8859	115.639	75.0908	99.7675	60.0049	135.965	57.5413	48.6305	60.3655	229.461	140.306	62.1234	59.2609	88.4326	75.2084	74.063	107.878	59.0096	110.188	95.8187	75.2245	50.3234	86.0702	80.1789	68.0339	59.0828
UBA1	177.34	117.534	132.133	122.205	143.543	192.657	133.097	202.155	201.149	188.718	295.324	191.336	156.086	188.191	125.406	157.581	172.66	157.322	147.514	56.956	256.279	184.026	114.481	171.685	117.804	142.919	183.357	158.829	169.292	208.605	256.08	190.143	152.831	265.897	195.296	207.363	198.967	219.252	186.63	196.724	182.686	135.76	134.723	183.495	160.744	205.722	209.407	162.733	195.427
UBA52	353.937	373.619	236.427	305.232	401.274	394.092	315.606	418.736	311.128	293.839	225.78	331.308	359.104	350.147	321.093	329.251	202.862	377.827	518.013	155.474	237.051	557.642	213.127	392.98	437.265	534.232	462.677	568.748	238.747	249.716	361.917	332.993	336.269	515.433	285.993	345.409	305.893	297.135	275.585	392.684	266.387	364.845	368.4	736.055	254.313	280.211	304.849	290.862	291.144
UBB	480.069	370.502	364.942	223.374	434.616	345.297	289.774	268.962	774.329	289.288	326.829	428.342	216.094	297.275	317.895	558.429	327.665	338.069	310.46	178.581	325.738	312.501	277.741	356.641	431.539	482.323	208.707	467.647	388.058	223.727	464.468	380.787	368.251	667.363	340.771	296.095	265.232	589.379	303.769	411.379	329.135	353.099	231.912	216.271	347.764	381.443	371.768	377.667	429.13
UBC	532.535	373.669	453.814	488.713	760.48	699.808	460.012	744.13	1642.43	927.08	881.813	659.964	632.794	428.851	1021.29	373.271	407.418	552.08	663.52	205.315	763.224	734.356	327.742	525.492	597.522	863.926	1014.38	651.765	527.701	562.699	834.652	846.952	1072.89	901.351	724.723	742.063	369.652	335.775	786.281	725.071	509.681	644.555	703.865	663.781	406.833	650.674	511.183	636.028	555.406
UBE2J1	97.6097	37.2568	76.1797	42.2154	34.8367	70.5731	60.6382	54.72	75.9933	58.4718	40.5502	93.2643	33.7564	40.6882	63.4122	34.3952	81.6865	63.3361	48.0549	37.2157	77.4665	77.2679	50.7031	69.3924	53.2927	62.9214	56.0784	64.4528	64.221	63.3766	38.2252	55.1274	33.3721	83.4701	69.7194	61.0883	36.6363	56.4856	42.9423	63.2723	62.353	78.143	43.8084	52.863	84.3604	82.8188	55.7205	78.9219	50.8319
UBXN1	142.382	105.098	120.479	150.452	255.107	151.708	105.392	146.712	118.996	117.078	129.38	141.821	170.26	119.885	134.373	109.207	82.7944	141.98	215.97	47.9846	117.089	194.032	85.6842	140.984	188.662	179.464	92.9867	180.475	89.7627	136.64	222.304	118.009	120.271	172.717	120.936	156.175	150.301	140.149	136.497	129.042	114.211	125.15	105.253	242.655	132.345	111.431	134.934	111.45	143.668
UGGT1	51.0067	12.1696	28.1352	12.6893	36.4631	26.1215	24.4278	30.5322	53.3419	27.2613	27.585	54.7205	17.9279	24.987	20.9074	14.2816	31.3901	16.052	21.0669	12.7067	55.401	17.9045	17.2125	26.03	28.182	23.02	26.4268	23.3028	25.4707	26.9623	27.9147	21.171	12.5904	35.0041	29.9612	23.5503	22.0635	19.6951	33.7011	32.602	28.1421	26.1885	17.2554	22.8289	21.4245	31.5572	27.3784	46.8781	26.1709
UGGT2	15.6578	3.4705	13.2167	5.817	15.2528	11.0562	7.178	9.6319	11.5299	12.4432	10.2097	20.3298	8.7419	8.7338	9.9816	16.7827	11.9417	11.9733	6.5524	4.4086	13.4367	7.18	6.1665	9.7797	7.7244	10.5481	11.5302	5.3964	4.5618	11.6319	6.0197	10.5275	7.2674	14.2118	9.4154	10.8608	7.4765	10.405	8.2025	10.6952	9.5072	11.151	6.6991	6.6008	6.9174	11.3125	9.7097	14.0023	12.5652
UMOD	0.1214	0	0.0216	0.2179	0.0451	0	0.5678	0.0351	0	0.0573	0	0	0	2.4008	0	0.0977	0.0617	0.0538	0.0631	0.4258	0.0694	0.0234	0.1102	0.0412	0.0655	0	0	2.4558	0	0.5845	0	0	0.0144	0.4066	0.424	0.1338	0	0	0	0	1.0155	0.0723	0.1157	0	0	0.359	0.0199	0.0838	0.2059
USO1	107.397	52.132	68.0375	32.3346	70.6412	52.4313	58.9773	63.573	96.902	62.2677	55.1943	114.607	37.5757	47.3461	63.935	41.4726	98.5551	52.0683	56.7408	38.184	117.783	37.0686	51.122	54.4272	48.9388	60.3468	59.9153	43.9442	80.2003	71.0073	46.3132	56.5552	71.6133	114.617	63.7679	63.5857	67.7274	62.3391	51.9637	70.1593	63.6927	71.8131	40.0501	26.6314	58.6132	81.8143	59.4135	107.375	72.3808
VCAN	270.537	11.8217	98.579	37.9256	154.984	102.792	137.828	234.3	337.773	99.5005	70.796	597.182	63.2558	38.0781	53.8316	7.2966	26.3733	226.858	35.6247	35.9428	297.061	43.41	40.6216	231.128	37.0457	117.171	49.4376	48.7187	2.4786	76.9063	100.752	140.557	18.7841	327.558	80.6311	139.715	121.082	81.34	109.722	190.833	151.555	267.696	11.877	42.0787	84.7747	172.789	76.7904	176.896	112.603
VCP	136.133	83.3158	114.715	62.146	155.006	124.486	83.3132	98.8753	184.801	117.834	167.439	151.251	89.8797	86.365	95.2956	90.2339	123.773	99.7971	100.481	42.8779	334.588	124.309	116.744	119.45	92.0176	138.643	109.988	104.401	141.351	115.862	139.486	103.82	94.6733	115.37	121.127	110.802	79.4319	85.1584	115.152	102.805	132.248	113.104	79.7275	165.589	103.17	105.899	100.11	122.628	107.053
VEGFB	154.922	214.613	167.865	175.532	185.022	195.034	153.936	185.101	98.5282	166.793	180.498	211.554	117.874	138.46	158.04	191.716	49.7281	301.007	137.772	64.4691	170.621	237.861	107.267	236.635	131.481	211.81	110.566	144.57	51.5377	156.971	233.182	221.733	75.3725	105.225	170.012	203.705	177.886	177.962	233.994	173.255	161.76	390.96	92.4478	205.335	128.651	145.794	157.793	120.52	166.397
XXYLT1	14.3029	5.5672	11.6892	8.3031	19.7207	11.0084	9.9845	18.1287	15.1801	15.0365	11.7629	24.5342	13.2957	12.1225	6.6659	4.9157	10.3554	19.9883	9.5231	3.0222	19.4037	10.8735	6.1981	15.0411	11.3231	13.5661	11.4713	8.742	6.5772	12.0478	16.4705	12.3807	6.3222	12.921	9.3746	16.8446	11.7883	12.5741	17.4356	23.8814	14.4461	17.9488	6.498	13.1322	13.9444	16.5788	10.033	14.2179	14.3867
YIPF1	68.0226	30.903	41.5531	47.1268	45.4731	52.0895	44.1293	75.8041	62.739	70.3069	75.1938	51.7206	52.8563	34.9479	38.8084	30.0167	76.6347	52.6148	59.7009	20.8001	59.6814	49.7835	41.9281	58.4318	36.8336	60.0992	36.4908	60.4396	49.2358	77.0729	69.4474	54.3922	42.9619	51.7752	63.2257	76.2294	48.6965	66.9497	61.8378	71.7471	53.7064	45.1473	46.2635	69.4102	45.5387	54.6283	70.0414	62.3151	56.9134
YIPF2	44.4833	202.007	49.5595	45.7087	66.8852	44.65	37.07	81.8119	34.1229	52.3266	56.7837	80.2555	51.2002	56.7831	49.9733	85.1466	54.9187	47.9657	59.0318	29.7714	78.3443	38.73	33.7031	40.0466	46.9567	46.5275	58.2121	36.4448	63.6426	61.4787	71.3468	50.1127	75.2658	48.7178	46.5311	70.0214	45.2213	72.8369	58.4495	42.5553	49.3519	41.9649	37.251	61.7626	43.6906	57.6222	56.3915	68.0844	50.1645
YIPF6	32.0418	29.1369	36.4796	11.9566	36.0867	24.5014	19.6823	23.0622	52.8358	27.4081	30.397	31.287	12.7382	15.0633	34.8396	34.2597	28.4369	16.4687	19.2162	12.4431	39.1648	11.8586	18.488	16.0165	19.3428	20.063	31.7559	18.8341	34.098	24.7836	24.8217	23.5479	21.7658	48.8153	20.6854	21.0654	25.605	25.1256	21.0923	23.9056	19.8517	19.6236	22.412	14.4706	19.8402	32.9445	27.2929	28.1127	22.3677
YKT6	61.4214	40.5612	32.9057	32.3931	56.2819	55.0587	36.5106	58.3865	63.4893	44.5798	54.7103	63.6983	42.2692	58.2145	33.2013	29.7013	41.2732	51.0844	46.9493	15.886	65.1653	44.1663	35.6236	48.7765	44.7666	55.4278	53.0649	61.9497	84.6029	41.5296	66.1787	34.588	41.1889	43.7864	43.3544	53.9283	43.0896	37.7877	42.3462	59.2795	47.9639	52.9676	30.7139	74.8538	51.0124	56.888	55.8332	48.4677	42.6089
ZC3H12A	19.7475	9.6987	14.9985	37.3278	65.5227	35.7752	25.3448	30.0207	30.7623	77.3591	40.509	15.165	67.1005	17.2302	48.9505	7.568	92.5911	19.3591	31.6727	18.2584	76.1717	53.9719	29.1979	26.4848	11.9504	14.081	32.1348	12.9346	11.2581	45.3276	30.9536	35.5356	68.9358	57.0636	93.5475	44.0139	120.528	96.2388	102.438	55.3862	35.0281	24.1134	43.8112	39.7325	14.7124	40.4649	49.1861	14.4962	69.2153
[truncated: 134 more columns]
