# Supplementary material for: A glycosylation-related signature predicts survival in pancreatic cancer
Source: Aging (Albany NY). 2023 Nov 30;15(23):13710–37. doi: 10.18632/aging.205258 (PMC10756102; doi:10.18632/aging.205258)
Supplement: Supplementary Table 2 [file aging-15-205258-s003.xlsx]

## Sheet: Sheet1
Supplementary Table 2. GRGs expression profile of PC in GSE16515.
Gene	GSM414924	GSM414925	GSM414926	GSM414927	GSM414929	GSM414931	GSM414933	GSM414935	GSM414936	GSM414937	GSM414939	GSM414941	GSM414943	GSM414944	GSM414945	GSM414946	GSM414948	GSM414949	GSM414950	GSM414951	GSM414952	GSM414954	GSM414956	GSM414958	GSM414959	GSM414960	GSM414961	GSM414962	GSM414964	GSM414965	GSM414967	GSM414968	GSM414969	GSM414971	GSM414973	GSM414974	GSM414928	GSM414930	GSM414932	GSM414934	GSM414938	GSM414940	GSM414942	GSM414947	GSM414953	GSM414955	GSM414957	GSM414963	GSM414966
A4GNT	4.66341	3.53777	3.52826	3.43597	3.54756	3.15594	3.48559	3.14004	3.53303	3.52247	3.62954	3.69351	3.53689	3.32931	3.15963	3.53664	4.34042	3.22027	3.33918	4.32232	3.545	3.18517	3.33374	5.03664	3.57271	6.72012	3.5046	3.38073	4.60906	3.17872	3.5166	4.46786	3.51636	3.49122	3.8161	4.37372	3.38918	3.44298	3.15495	3.53623	3.56205	3.54588	3.3646	4.81064	3.41932	3.58661	3.07642	3.51705	3.38662
ABCA2	4.41292	4.47272	4.426	4.45656	4.45823	4.53864	4.45425	4.29102	4.19192	4.22898	4.42137	4.385	4.36401	4.59162	4.79898	4.37729	4.31188	4.38172	4.4604	4.05923	4.94529	4.64324	4.39522	4.65212	4.76034	4.5627	4.40566	4.68376	4.59707	4.50722	5.24011	4.30711	4.94757	4.67545	4.54486	4.64973	4.59632	4.61324	4.5	4.55125	4.19909	4.60485	4.19589	4.20126	4.59278	4.85172	4.41488	4.75622	5.22831
ACAN	4.58598	4.5664	4.83634	4.50556	4.52525	4.81208	4.91964	4.55899	4.55929	4.55566	4.59816	4.44802	4.65397	4.63566	4.65106	4.64378	4.62474	4.68557	4.55651	4.42793	4.55735	4.70467	4.79984	4.97742	4.86378	5.09444	4.68346	4.95714	4.61354	4.81892	4.6673	4.53917	4.19142	4.94504	4.59657	4.67838	4.45744	4.58706	4.96419	5.36413	4.43724	4.59362	4.93856	4.81208	4.80436	4.67971	5.58736	4.99377	4.7787
ACTR10	9.74837	9.86262	9.85995	9.76054	9.94752	10.4236	10.0373	10.0156	10.2172	9.92032	9.68395	9.78487	10.3219	10.0408	9.25284	9.95305	9.94752	9.81205	9.8489	9.87365	9.59082	10.0309	9.5026	9.89759	9.87365	9.3594	9.82019	9.97034	9.61977	9.65819	8.84377	9.84079	9.86522	10.1015	10.0247	9.78984	9.74313	9.67397	9.85995	10.0498	9.72294	10.0408	10.0748	9.80957	9.96485	9.78732	9.54163	9.84341	9.60637
ACTR1A	6.12067	6.17189	6.05268	6.41044	6.20046	6.12705	5.97908	6.49711	6.51259	6.45387	6.38547	6.39572	6.23584	6.28594	5.96704	6.19023	6.30613	6.19668	6.31802	6.18541	6.37762	6.65202	6.38326	6.36115	6.38112	5.8254	6.51423	6.46214	6.50093	6.54693	6.78391	6.04653	6.24191	6.5424	6.47258	6.45553	6.3008	6.03995	6.47318	6.10724	6.41354	6.42982	6.05421	6.29584	6.37671	6.44034	5.74254	6.63017	6.83488
ADAMTS1	6.15588	6.98233	7.63398	6.87415	7.01495	7.89971	7.12443	8.51311	6.99121	7.37517	8.39973	8.48256	7.94604	6.40617	5.65623	8.1469	5.87338	8.24936	7.88469	8.00739	8.53962	7.12443	8.81565	6.5136	9.68133	6.03966	8.19211	8.48256	8.30408	7.60835	8.79301	8.28088	5.86159	7.48129	8.00416	7.972	6.86523	9.86769	8.37312	9.46467	8.1258	9.61513	8.66057	7.97128	9.21453	8.31346	8.5192	9.50828	7.78801
ADAMTS10	5.56672	5.72201	5.75252	6.12793	5.13383	5.58683	5.5508	5.27508	5.04364	5.326	5.50717	5.3706	5.35443	5.5938	5.03908	5.31382	5.49203	5.18038	5.51113	5.2604	5.94707	5.77886	5.51521	5.42632	5.65756	5.80093	5.48572	5.85824	5.46455	5.50422	5.93749	5.26423	5.97621	5.27299	5.38703	5.93494	5.8571	5.8956	5.58928	5.44799	5.0826	5.50663	5.9524	5.43544	5.52493	5.77779	5.88728	6.13826	6.7304
ADAMTS12	5.8927	5.88484	5.26722	4.37238	5.45554	6.35692	5.8627	6.00407	6.25506	5.77936	6.05829	5.45251	5.8172	5.34738	4.60935	5.75696	5.95835	6.11207	5.63226	5.91956	5.2945	6.14428	5.83196	6.59199	5.36594	5.84766	5.86698	4.36455	5.8781	5.55003	5.13159	5.81361	4.97496	6.62854	5.57189	5.43786	4.66539	3.77034	6.38768	4.17685	3.77844	5.43948	4.04806	4.48666	5.31627	5.47751	5.05771	5.57877	4.16687
ADAMTS13	4.918	4.56296	5.01398	5.31007	4.5788	4.65541	5.23748	4.5274	4.57002	4.12222	4.31709	4.48153	4.55097	4.67267	4.72616	4.73111	4.65489	4.34958	4.49379	4.30884	4.5534	4.85253	4.61785	4.88821	4.61785	4.3992	4.4621	4.32599	5.011	4.5813	4.79597	4.33089	4.69449	4.88737	4.45456	4.61868	4.627	5.15993	4.66312	4.78742	4.74106	4.21536	4.7787	4.76034	4.35723	4.63199	4.88255	4.58787	5.48545
ADAMTS14	4.98177	5.30591	6.17575	5.03796	5.22525	4.98494	5.31603	5.74121	5.08949	4.79703	5.15857	4.87786	5.54565	5.27405	4.98552	5.9246	5.29608	5.87593	5.15962	5.12564	5.35155	5.47358	5.1799	6.16983	5.65623	5.13052	5.1799	5.59357	5.9966	5.95488	5.82571	4.87578	4.83693	5.83115	5.0707	5.19269	4.89362	4.49743	5.65994	5.3078	4.89663	5.34716	5.37841	5.46876	5.21764	5.20612	5.55471	5.23875	5.06037
ADAMTS15	4.41743	3.72275	4.71149	3.47737	3.68381	3.91281	4.26023	4.19029	3.86228	4.5091	4.58104	3.77132	4.16415	4.38392	4.05534	4.64829	4.36347	3.90188	3.89357	3.71312	4.39548	3.88653	4.17633	4.03264	4.82358	3.54734	4.15395	3.68435	4.15811	4.5954	4.16145	4.4577	4.54058	3.60618	4.3211	3.85568	3.68283	4.95322	4.22563	4.62391	3.99821	5.18584	3.65447	3.91833	5.54044	5.4038	3.76584	5.1401	3.34291
ADAMTS16	4.10708	4.37811	4.10217	5.28462	4.62526	4.19192	3.98057	3.84225	4.13487	4.85412	4.82973	4.16059	5.67596	4.18571	4.09664	4.09333	4.09692	4.3828	4.42056	4.14981	4.57909	4.07136	4.9828	5.16685	4.21005	4.07087	4.07613	3.92758	4.1297	4.75982	4.15945	4.04971	4.00295	4.07035	4.00381	4.29074	4.15833	4.12086	4.1545	5.66964	4.17982	5.1727	4.4425	4.0753	6.29159	4.18519	4.08375	3.99373	4.02465
ADAMTS17	3.37371	3.28062	3.47464	4.4419	3.394	3.36332	3.66024	3.53534	3.50906	3.3226	3.3529	3.36078	3.48235	3.32993	5.3667	3.70332	3.26982	3.60068	3.40419	3.46433	3.51992	3.41973	3.58549	3.55259	3.19558	3.78756	3.41495	3.58074	3.50643	3.45992	3.57788	3.51837	3.31925	3.54636	3.34118	3.87132	3.68487	4.59134	3.4173	3.58925	3.43642	3.47758	4.85385	3.69816	3.58389	3.44676	3.79828	3.39284	5.34843
ADAMTS18	3.71669	4.15558	4.06933	4.01201	3.84071	3.96197	4.41828	3.8917	3.9617	4.18136	4.1418	3.8991	4.13653	3.80004	4.02244	4.29102	4.12997	4.29857	4.49151	3.89357	3.99187	3.82206	4.20268	3.76908	3.80755	3.87241	3.97636	3.808	3.90347	4.29461	3.76733	3.81719	3.78191	3.85745	4.03676	4.08215	3.87052	3.82287	4.23975	4.98065	3.58753	5.33039	3.83546	4.02657	4.45715	3.83971	4.45567	3.94798	3.94711
ADAMTS19	3.02296	2.99833	2.95527	3.062	2.96101	3.00001	3.00777	2.90173	2.95219	2.94626	2.96726	2.91029	2.96324	2.99955	2.94502	2.89575	3.09591	2.92788	2.86988	3.02318	3.00408	2.97271	3.00428	2.9598	3.05853	3.10275	2.93444	2.99156	2.92155	2.91097	3.01123	2.97629	2.92915	2.93381	2.93593	2.95375	3.06502	3.10687	2.97408	2.9729	3.01103	2.96834	3.10256	3.27068	2.90294	2.98987	3.05633	3.0104	3.34868
ADAMTS2	5.85689	6.4895	5.30066	5.21466	4.93523	6.7776	5.90842	7.21849	6.10903	6.35726	6.53551	6.41259	6.94938	5.17434	5.11114	6.4964	6.38425	6.96308	6.75226	5.98439	7.17029	7.13468	7.08435	6.87293	6.12309	5.93384	7.39834	5.65436	6.74976	6.57772	5.29212	6.16019	5.95579	7.27314	6.08624	6.30274	5.58903	4.46243	7.25989	6.54077	3.88085	5.95972	4.64208	5.62389	7.0311	7.27768	6.00902	7.08726	3.91334
ADAMTS20	2.6592	2.70037	2.64772	2.65279	2.67139	2.67022	2.65354	2.65845	2.64326	2.71368	2.70901	2.84239	2.73953	2.81274	2.72523	2.67639	2.65317	2.65433	2.71337	2.64844	2.66267	2.66947	2.68406	2.67425	2.68167	2.74036	2.6837	2.73118	2.66073	2.68236	2.65317	2.65354	2.66108	2.6848	2.64844	2.69435	2.70245	2.70135	2.6834	2.7143	2.67892	2.66389	2.66611	2.72794	2.70222	2.68444	2.72914	2.66499	2.6874
ADAMTS3	3.50801	3.26653	3.28235	3.48032	3.2245	3.2616	3.09809	4.46898	3.34996	3.12033	4.0093	3.88388	4.04268	3.14023	3.26293	4.04268	3.23133	3.94469	4.27948	3.8991	3.98086	3.24458	4.96148	3.46788	3.6788	3.02658	3.82505	3.00717	3.51527	3.57836	3.13805	4.27837	3.29315	3.17465	3.44188	3.58952	3.19739	3.42217	4.25727	5.81749	2.84616	4.59047	3.48104	3.00958	5.22399	4.64181	2.96994	3.69475	2.99541
ADAMTS4	3.85899	3.26737	3.80654	3.75517	3.94875	4.92181	4.54315	3.95523	4.054	3.9186	4.32345	4.33472	3.72894	3.98698	4.22095	4.28127	3.74414	3.71541	3.90425	3.94952	3.97394	3.86705	4.7787	4.01124	4.81064	3.85745	3.71219	3.88026	4.40761	3.91004	3.81416	3.03153	3.78783	4.68113	4.05111	3.88778	3.9286	4.12831	3.75779	3.96035	4.03889	4.24902	3.67065	3.78783	4.07838	4.18861	4.03156	4.02465	3.60779
ADAMTS5	4.91054	5.40768	5.36765	4.61525	5.95605	5.99435	5.64451	5.35443	5.37085	5.8021	6.00701	4.84122	5.88994	3.84528	5.62143	4.88046	5.73322	4.86553	6.35995	5.7873	5.16768	4.76985	7.9017	5.17928	5.01074	4.6738	5.10022	4.07584	5.16211	5.87115	4.56153	6.13045	4.37921	6.92869	4.49404	5.24402	4.42245	5.44081	5.86159	6.51736	5.72831	6.54693	4.90129	5.1401	5.90154	5.22476	5.84713	5.48572	4.55817
ADAMTS6	3.91494	4.21482	4.32487	3.24811	4.02732	4.33497	4.91856	3.7591	4.53812	4.17149	3.90002	3.676	4.48582	3.78837	5.09774	4.99407	4.43135	4.16389	3.95766	4.12362	3.53643	4.06962	4.47792	4.76926	4.40202	4.05834	3.62262	3.46394	3.92414	3.92783	3.70278	4.34624	3.61545	4.3828	4.34537	3.92414	3.13728	3.36098	3.81475	4.01525	3.12183	3.75704	3.90265	3.72072	4.04887	3.82533	3.31903	3.34726	3.13371
ADAMTS7	4.36686	4.03625	4.08871	4.04857	4.13905	4.04887	4.02304	4.07722	4.34344	4.10048	4.06827	4.05613	4.05584	4.09141	4.08679	3.96425	4.12671	4.00537	4.17469	4.03943	4.10931	4.11715	4.05028	4.22869	4.05453	4.16812	4.08164	4.08871	4.10875	4.02054	4.15035	4.03236	4.08532	4.24383	4.13598	4.27837	4.10708	4.21509	4.21787	4.09857	4.17389	4.08508	4.30884	4.24786	4.1393	4.15143	4.35977	4.10272	4.14291
ADAMTS8	4.10408	4.12437	4.33194	4.08819	4.28864	3.70255	3.52939	4.49291	3.79536	4.13379	4.23814	4.31487	3.99132	3.74414	4.17287	4.37787	3.84659	4.227	4.5437	4.33742	4.71869	4.04213	3.59223	4.1308	4.17633	3.7563	4.99348	3.80497	4.03866	3.81955	3.6559	4.33912	4.01922	3.97281	4.2807	4.1967	4.30662	4.94109	4.81987	4.67789	5.35738	3.99104	4.03264	4.11628	4.64128	5.18298	3.89117	4.67208	4.06528
ADAMTS9	5.12145	4.97021	5.48728	4.72232	4.69119	4.54058	4.41262	5.57459	4.77619	4.89244	5.53589	5.82718	5.76681	4.80571	5.87645	6.66407	5.19531	4.95246	5.35518	5.73052	4.79159	5.22662	5.60813	5.21681	5.87	5.32391	4.80873	5.08202	5.47084	5.08095	6.9639	5.71551	4.54546	4.82712	5.53561	4.99192	5.07017	6.26616	5.73892	6.1872	4.43638	6.30713	5.49965	5.25417	5.60337	5.46532	4.51707	5.63425	4.43297
ADAMTSL1	3.43556	3.6709	3.57362	3.46612	3.50735	3.47109	3.44363	3.7349	3.73093	3.56861	3.61403	3.4648	3.70983	3.36573	3.38226	3.52669	3.46223	3.60162	3.69619	3.43578	3.57123	3.48919	4.06232	3.46682	3.46918	3.22425	3.70858	3.40483	3.57739	3.77107	3.20292	3.63976	3.29419	3.50143	3.45331	3.44384	3.55434	3.44452	3.66521	4.41907	3.97529	3.60162	3.44867	3.42989	4.05319	3.74108	3.27388	3.83598	3.5117
ADAMTSL2	5.15073	4.59874	4.9199	3.91648	3.96504	4.60598	4.47824	6.1041	3.89276	4.54117	4.42056	5.24295	3.91884	3.78361	3.9343	5.51936	5.21708	5.43626	5.24537	3.91121	6.35692	5.05771	4.97577	3.98969	4.44835	3.65232	6.55652	4.03699	5.03634	4.87248	4.27673	4.53603	6.0926	3.83143	5.27109	5.50583	4.90556	3.95766	5.27697	3.95216	3.81035	5.36057	4.53603	3.98218	5.82779	5.90183	3.9527	5.98277	4.106
ADAMTSL3	4.0706	4.23723	3.90525	5.77231	4.97231	4.19965	4.69582	5.04924	4.19113	4.80762	4.72337	5.56507	4.80407	4.64889	4.5976	4.37265	4.64604	5.26932	4.74471	5.24377	5.80005	4.6589	4.46925	4.83204	4.63454	3.64317	5.19862	4.65566	4.8361	4.67468	4.31106	5.69248	4.92703	3.91229	4.93358	5.63315	5.77022	6.32562	5.21226	4.69389	5.62143	5.13244	6.22073	6.32784	5.69603	5.61729	5.30645	5.6938	6.37544
ADAMTSL4	4.83025	4.82764	4.23673	4.3648	5.3386	5.96104	5.96933	4.94318	3.86396	5.56752	6.24279	5.04899	6.00069	4.97768	4.15811	4.18742	6.04461	5.39783	5.95579	3.87974	5.14218	5.82946	5.5825	5.97739	5.24537	5.53377	5.75881	6.30804	5.50049	5.16183	7.72109	4.01308	5.50583	6.64631	6.79259	6.09976	4.1052	4.04971	4.7349	4.74632	4.24437	4.80436	4.45847	4.28346	5.02237	5.23748	5.48297	4.5627	4.38202
ADAMTSL5	4.56126	4.22149	4.38392	5.18711	4.33939	4.48101	4.39715	4.28425	4.31626	4.39036	4.7069	4.42793	4.31433	4.41937	4.09747	4.44446	4.47971	4.28101	4.26156	4.13325	4.58298	4.44335	4.32982	4.4241	4.82012	4.99269	4.36654	4.30325	4.46982	4.33007	4.97386	4.34069	4.69482	4.35411	4.36119	4.96419	4.43297	4.92922	4.82238	4.48127	4.80124	5.06342	4.98732	5.16425	4.48209	4.48784	4.81892	4.36686	5.96676
AGER	3.94822	3.67497	3.71412	3.75391	3.69351	3.58368	3.60639	3.68024	3.7959	3.65712	3.62309	3.68435	3.67285	3.69694	3.58592	3.78236	3.64764	3.65666	3.68461	3.69397	4.1297	4.09173	3.65689	3.83598	3.69351	3.64991	3.60479	3.66889	3.52961	3.84844	3.77233	3.60549	3.67471	3.69397	3.7943	3.65064	3.62813	3.81187	3.71363	3.79274	3.68843	3.68797	3.82663	3.71893	4.12648	3.67574	3.65928	3.74056	3.704
AGRN	5.8212	6.58795	6.54922	6.3049	5.64286	6.17338	5.78048	5.97048	5.48212	6.05484	6.4665	5.86726	6.12679	5.68429	5.40517	5.48621	6.25993	5.84412	5.84658	5.35101	6.32996	6.09344	6.19842	6.34125	6.5129	6.511	6.27375	6.49779	6.14428	6.85377	6.63884	5.22059	6.54109	6.33878	6.63095	6.40645	6.07998	5.8706	6.13857	5.0691	4.91964	5.28117	6.09235	5.67321	5.22216	6.0743	6.55783	5.95458	6.94899
ALG1	5.31488	5.55418	5.65004	5.80036	5.7252	5.59599	6.0387	5.46635	5.48324	5.60232	5.8956	5.11085	5.363	6.71546	6.26082	5.30269	5.49802	5.51216	5.49076	5.37977	5.95947	5.58014	5.69466	5.89648	5.54885	5.90088	5.59683	5.91983	5.94958	5.54591	5.23452	4.52686	5.24456	6.12929	5.66604	5.61046	5.60863	5.72143	5.37213	5.63054	5.33039	5.07957	5.85434	5.54754	5.36646	5.0681	6.23394	5.58441	5.90897
ALG10	3.42328	3.64288	3.33331	3.34035	3.38939	3.48559	3.7419	3.13516	3.86475	3.60186	3.10604	3.42217	3.49192	4.96372	3.95498	4.14079	3.71055	3.31005	3.26272	3.52801	3.50687	3.64147	3.66045	3.71819	3.65284	3.21795	3.35644	2.90255	3.4713	3.84735	3.71488	3.22723	3.22361	3.56861	3.8631	3.69397	3.23689	3.1205	3.44524	3.13516	3.71793	3.18073	3.35644	2.80129	3.33078	3.43396	3.01164	3.123	3.69127
ALG11	8.43348	8.46182	8.24111	8.01718	8.41946	8.52005	7.93678	8.12852	8.16932	8.02308	7.98937	8.07141	8.20669	6.93063	8.00739	7.99389	8.02722	7.83759	7.66706	7.91206	7.5735	8.03881	7.75567	7.79768	7.49308	7.3673	7.64173	7.99389	7.48711	7.64676	7.47452	7.75748	8.11004	7.81026	7.88047	8.10655	8.00817	7.55926	7.65661	8.28884	7.97788	7.83821	7.29672	7.66493	7.74353	7.76684	7.33711	7.84287	8.0772
ALG12	6.38083	6.04712	6.07971	6.4176	5.60624	6.00525	6.68716	5.40164	6.12929	5.80976	5.8781	6.06286	5.35599	6.19291	6.77215	5.87567	6.12006	6.02641	5.92577	5.50446	6.64967	6.22271	6.2572	5.89534	6.08425	6.20847	6.45553	5.86614	6.1509	6.82455	7.06584	5.29759	5.71945	6.35252	5.39453	6.0323	6.29873	6.53262	5.95999	6.09093	6.68172	5.80398	6.27928	6.24102	5.9966	6.13885	6.36533	5.97858	6.62163
ALG13	6.07817	5.87199	6.10816	6.20367	6.30713	6.06372	6.57639	6.14578	6.38112	5.92659	5.8444	6.08144	6.33913	6.38636	6.22445	5.99351	6.08854	6.11472	5.991	6.49807	5.94562	6.08484	5.93634	6.19897	6.16719	6.16162	6.18206	6.61125	5.97679	6.00038	5.77936	6.3687	6.08484	6.1547	6.31115	6.10297	6.20969	6.30115	6.0671	7.0614	6.21058	6.41319	6.38457	6.47508	5.96757	6.12447	6.45807	6.25136	6.05355
ALG14	5.14667	5.53645	5.65029	6.37054	5.70122	5.22688	6.40861	5.48884	5.56728	5.59196	5.72913	5.33551	5.48703	5.14067	6.49807	5.17841	5.61778	5.76878	5.4024	5.95374	5.46294	5.32368	5.48998	5.36186	5.58521	5.05908	5.62303	5.9341	5.64873	5.30881	5.62195	5.81749	5.76509	5.93208	5.42301	5.89072	6.28103	6.32628	5.67152	6.06996	6.04683	5.61293	6.40617	6.30931	5.56241	5.40692	6.39543	5.79065	6.86296
ALG2	6.33878	6.19668	6.52505	7.2849	6.6298	6.01346	6.88904	6.11097	6.47508	6.29426	6.23328	6.19897	6.20969	6.11802	6.65656	6.50429	5.80948	6.44034	6.07581	6.46496	6.15203	6.24512	6.07056	6.43112	5.86643	5.95293	6.10701	6.01746	6.19614	6.00378	6.41486	6.17279	6.47033	5.99981	6.17725	6.66031	6.80277	6.77254	6.33465	6.88298	6.29676	6.2311	6.90354	6.71941	6.20017	6.26797	7.22789	6.19586	7.22917
ALG3	7.45389	6.76289	7.3944	7.22424	7.59974	6.99805	8.0513	6.68516	7.53113	6.77647	7.49763	6.73517	6.83149	7.43183	7.58739	6.7015	7.03361	6.65165	6.74844	6.92364	7.07435	6.7445	7.60567	7.43779	7.32952	7.2863	6.9283	6.80467	7.08977	7.25213	8.44906	6.4016	6.92059	7.21758	6.89676	6.7779	6.93749	6.93592	6.73693	6.72094	6.89379	6.34961	6.67928	7.017	6.79951	6.74759	7.048	6.61931	6.49581
ALG5	5.35921	5.22138	5.22774	6.02088	5.25905	5.28001	5.41253	5.26722	5.67206	5.33357	5.11057	5.13023	5.2258	5.0134	6.06111	4.99249	5.23556	5.33181	5.00425	6.37239	5.05883	5.15123	5.17711	5.03773	5.2353	5.09581	5.00903	5.20828	5.14642	5.19623	5.31971	5.99981	5.12968	5.16297	5.1553	5.42139	6.18091	6.35443	5.20852	5.64539	5.36719	5.21657	6.03935	6.35348	5.10356	5.04119	5.71474	5.2443	5.99924
ALG6	6.47633	6.70718	7.25127	7.39681	7.45929	7.02602	7.81553	6.90535	6.59305	7.44354	6.98971	7.08766	6.87293	8.18025	7.61481	6.24672	7.43533	7.02125	7.16627	7.76399	6.64309	6.49086	6.71064	6.92059	7.5218	6.70755	6.89236	6.40924	7.13227	6.76251	6.80026	7.45197	6.59709	7.54895	6.93323	6.93679	7.59601	6.57096	6.85999	7.15457	7.79359	6.66936	7.24594	6.75906	6.85649	6.60185	7.06748	6.88152	7.82542
ALG8	8.30945	7.34481	8.12037	8.28884	7.75973	8.35427	8.64137	7.66277	8.34456	7.36544	7.88408	7.42451	7.424	9.02988	7.52791	8.78653	7.61108	7.08726	7.26521	7.99256	7.13425	7.65552	7.66814	8.25006	7.41835	7.32632	7.28309	6.83557	6.81045	7.41276	8.22313	8.09893	7.46429	7.33037	7.33474	7.66706	8.28168	7.85163	7.16024	7.68308	7.33889	7.31484	7.81916	7.89569	7.21058	7.40568	7.19513	7.54387	8.13481
ALG9	6.38984	5.71359	6.45579	7.2468	6.47128	6.28131	6.50871	6.38358	6.40586	6.31676	6.17279	6.09176	6.04772	6.57135	6.77828	7.08187	6.43077	6.46682	6.36449	6.41889	5.98384	5.83417	6.24886	6.1701	6.14065	5.45838	5.91275	4.82973	6.06342	6.07143	6.2031	6.47033	5.81498	5.98384	5.89133	6.26082	7.03604	7.12683	6.56967	6.56508	6.83447	6.77215	7.14983	7.10339	6.47905	6.23359	5.9716	6.42425	7.47101
AMDHD2	4.69482	5.23688	5.01264	5.3884	5.24011	5.92714	5.35026	5.0466	5.30453	5.27454	5.25932	5.1799	5.13244	6.05916	3.51615	5.02984	5.52914	4.64076	5.19676	5.28226	5.1591	5.26961	5.7934	5.99981	5.96276	4.99649	5.59407	4.87496	5.23224	5.28961	5.70122	4.03725	5.23071	5.4235	5.1346	4.87087	4.70579	5.26612	5.44434	5.3373	5.07611	5.85409	5.64312	5.56831	5.72492	5.29862	4.45394	5.29887	5.66106
AMFR	5.21303	6.44004	6.98577	6.13621	5.82515	6.09205	4.74019	6.18206	5.164	5.62725	6.03669	6.29521	5.51753	5.9654	5.43152	5.71998	6.75797	6.53058	6.6424	6.10586	6.83337	5.92487	6.39048	5.95263	5.86895	5.8902	5.85824	5.24913	5.59878	4.74496	5.29039	5.98895	6.33942	5.68185	5.91874	4.94287	6.25106	5.37323	6.34098	5.50862	6.65757	5.78164	6.4895	5.24642	6.82378	5.8627	6.22124	4.87874	5.2596
ANK1	4.67838	4.05694	5.46241	4.08133	4.39436	4.77387	4.35325	4.16759	3.90684	4.12601	3.88168	4.17469	4.55456	4.17178	3.92335	4.29311	4.53127	4.2425	4.06799	3.97895	3.91994	4.63231	3.92308	4.16172	4.1096	3.9485	3.85273	4.07694	4.24113	4.07357	5.22476	3.95158	4.16735	3.96225	4.07668	3.91884	4.02547	4.10136	3.87241	3.98351	4.01368	4.07011	4.04779	4.0778	4.00565	4.20926	3.89957	4.00164	3.84475
ANK2	3.88388	4.26516	4.72647	4.2137	4.26257	3.88059	3.83061	4.38335	4.05189	4.35094	4.58929	4.34681	4.54399	4.37122	3.73595	4.34235	3.83226	4.43409	4.30859	4.84122	4.81264	4.3982	4.87357	4.13242	5.59544	3.40609	4.40708	3.96279	4.28536	4.43323	3.61669	5.29369	3.82795	3.97738	4.11861	4.10298	4.2417	4.40147	4.24539	5.28886	5.22293	5.30295	4.92594	4.63882	5.45736	4.66703	4.8001	4.72477	3.50277
ANK3	6.14964	5.31875	6.05299	6.65235	5.65649	4.75266	5.4387	5.41819	5.19531	4.92512	5.18012	5.76935	5.01538	5.81194	4.54954	5.53483	5.39502	5.58094	5.29238	5.34333	5.4797	5.76185	5.21276	5.46321	5.85851	5.50663	5.31148	5.74692	5.14373	5.03823	5.22399	6.00525	6.07056	4.68891	5.00845	5.47196	6.21962	6.29905	5.27056	5.24965	6.95313	5.4946	5.94985	6.23609	5.38946	5.65968	5.91275	5.72913	5.51434
ANKRD28	7.19135	7.7136	8.15618	7.32592	7.26033	7.23772	6.56167	7.32188	6.76857	6.81545	7.77188	7.31392	7.34292	8.03186	7.39976	7.66541	7.16669	7.79705	6.93323	7.41276	6.8681	6.21291	7.8853	7.31794	7.58221	7.70567	6.40553	7.59372	7.3375	7.00749	6.77215	7.30454	6.60613	7.74534	6.90658	7.31197	7.50375	7.57092	7.32952	8.23202	7.06096	8.01183	7.33128	7.68427	7.61213	6.83082	8.11617	7.00393	7.34671
APOB	2.91495	5.5029	4.43987	2.90255	6.92869	2.94192	2.91308	2.94606	3.08558	3.0803	3.12817	3.08083	3.40651	2.91884	9.079	2.94131	2.88591	2.93027	3.46982	2.9254	2.86825	2.95628	2.89018	6.68681	2.98829	2.89533	3.44739	2.92769	3.70955	3.10013	3.9356	7.10932	2.88613	2.94864	2.85891	2.881	2.86988	2.82382	2.94085	2.97878	11.7439	3.20311	2.80934	3.41166	3.3331	2.89236	2.86595	2.89148	2.85224
APP	9.53962	9.49287	9.45072	9.43915	9.07146	9.42481	9.49287	9.54163	9.12721	8.94919	8.82693	9.71023	9.34465	9.16359	9.66929	9.43915	9.25284	9.44259	9.18553	9.55581	9.44857	9.70774	9.14051	9.56011	9.46677	9.46056	9.47324	10.3919	9.33076	9.20818	10.2103	9.45662	9.3779	10.2301	9.72294	9.66085	9.42852	9.46056	9.65158	9.45485	8.96198	9.13625	9.30753	9.49889	9.16997	9.44857	9.8489	9.59082	9.07589
ARCN1	7.37776	7.11476	7.34671	7.7475	7.07559	7.41128	7.3585	7.66493	7.18477	7.24423	7.6025	7.37421	7.28846	6.90696	6.85413	7.95714	7.31243	7.78553	7.41876	7.0968	7.6704	7.70732	7.34861	7.46674	7.36688	7.63797	7.58386	7.85623	7.49924	7.23467	7.03645	7.34861	7.27994	7.50822	7.78494	8.11817	7.41556	7.81724	7.60511	7.46473	6.93592	7.68252	7.7051	7.99324	7.67758	7.83325	8.2359	7.66981	8.28715
AREG	3.77662	4.99058	6.41587	3.76197	5.02023	5.16741	5.13214	4.97411	5.41922	5.07611	4.82631	5.78893	5.0838	4.28346	3.66188	4.97957	4.51182	5.38893	4.42994	6.00236	4.28754	4.97742	4.9232	4.98873	5.49127	5.81953	5.03959	5.92005	5.58877	5.59712	5.0045	5.09416	4.32319	6.50871	6.15264	4.5293	3.79643	5.1346	4.18414	5.74773	3.78515	5.11145	4.02217	4.20977	4.16089	4.67348	4.75814	4.71177	3.60403
ARF1	8.10655	7.83385	7.47257	7.83151	7.85357	7.97919	8.12168	7.37008	7.8203	7.72625	7.93218	7.76511	7.41179	7.557	8.43161	7.71931	7.58636	7.63628	7.64014	7.77859	7.69421	7.94992	7.80483	7.6709	7.72509	7.85864	7.5971	7.43533	7.7959	7.84905	8.28485	7.5538	7.62031	7.73092	7.62139	7.83151	7.67706	7.73928	7.58167	7.56874	7.6791	7.70411	7.88408	7.67706	7.61644	7.65829	7.57247	7.53316	7.9566
ARF3	7.88047	8.23202	7.80967	7.6638	7.97398	7.91842	7.28351	7.96559	8.03811	8.19598	7.93149	7.73805	8.03048	8.24254	7.64572	7.76038	8.21646	8.01373	8.05583	7.45347	8.33111	8.29833	8.53873	8.03735	8.27213	7.95117	8.60063	8.32128	8.23202	8.22966	8.7771	7.35301	8.29521	7.93998	8.1258	8.26758	7.86706	7.32861	8.12992	7.43928	7.78275	7.85623	7.42028	7.05891	8.11205	8.28792	7.7481	7.73341	7.95905
ARF4	10.5948	10.8825	10.8773	10.3331	11.9641	11.3764	10.8716	10.9259	10.8825	11.1733	11.2778	10.9482	11.2174	10.7343	10.0914	10.9866	11.129	10.845	10.8349	11.5016	10.5173	10.8985	11.2608	11.4123	10.9743	11.3398	10.9927	10.4747	10.8404	10.6982	11.5762	10.9804	10.7343	11.2174	11.0626	11.0225	10.4344	10.1015	10.8033	10.6936	10.3331	10.2438	10.1364	10.1589	11.1365	10.6381	10.5763	10.4917	10.5386
ARF5	7.50822	7.76038	8.01373	7.7886	7.53939	7.45298	7.9158	7.47152	7.48336	7.78668	7.38476	7.52646	7.32055	6.87673	7.92855	7.43629	7.6501	7.46473	7.42114	6.94045	7.93877	7.96618	7.37191	7.96997	7.66047	7.85561	7.76511	7.85561	7.76399	7.36024	7.52554	6.90164	7.77744	7.63848	8.23808	8.04813	7.96814	7.80842	7.60624	7.31056	7.33566	7.56402	7.31243	7.51622	7.68427	7.81553	7.40273	7.47552	8.32308
ARFGAP1	6.57276	6.77354	6.97289	6.01852	6.15407	6.85884	6.80711	6.83524	6.22243	6.23359	6.66336	6.53774	6.46747	6.92139	6.66336	6.69183	6.51324	6.5107	6.26648	5.36241	6.87897	6.76713	6.65723	6.91723	7.08684	7.1541	6.52605	6.48397	6.86151	7.3664	6.87853	5.50243	6.67664	6.64562	6.75434	6.7675	6.17852	6.39849	6.46682	6.10816	5.72857	6.26586	6.48917	6.55186	6.7622	6.49413	6.58896	6.29097	6.68752
ARFGAP2	5.4941	5.45005	5.48142	5.79367	5.27508	5.6854	4.97847	5.21523	5.48166	5.33278	5.44373	5.19731	5.3294	5.5508	5.54462	5.41628	5.42814	5.25532	5.30142	5.19783	5.53483	5.38199	5.30981	5.46876	5.56268	5.48595	5.48022	5.25724	5.4147	5.53645	5.47435	4.81324	5.39783	5.30952	5.50556	5.44135	5.50937	5.88183	5.3608	5.07017	5.41789	5.47833	5.58305	5.4797	5.54671	5.30481	5.45995	5.50717	5.90261
ARFGAP3	9.47919	9.98527	9.26941	10.6476	9.30753	9.83833	9.54371	9.20649	10.2268	9.07009	9.26279	9.9146	9.28977	9.29303	9.29487	9.88709	10.1824	9.87365	9.63745	9.21604	9.46677	9.06843	9.10276	9.46862	9.3059	10.5133	9.26617	10.6982	9.82268	9.51	9.75331	9.59549	8.9286	10.2738	9.14236	10.2034	10.5133	10.4464	9.87071	9.40533	9.39238	9.22631	10.4579	10.3681	9.08069	9.24164	10.7034	9.64664	11.1589
ARFGEF1	6.4176	6.07256	6.38513	6.33942	6.64631	6.79259	6.5025	6.11535	6.41044	6.10701	5.95718	6.2346	6.1675	5.91785	6.09792	6.52665	6.37455	6.10436	6.28013	6.69107	6.35502	6.87107	5.8684	6.62696	6.06859	6.52374	6.59092	5.5917	6.42597	5.89783	6.82862	6.56167	6.78071	6.03808	6.1675	6.19175	6.32562	5.99723	6.28248	5.73974	6.40373	5.8383	6.43655	6.24979	6.2311	6.41319	6.01908	5.98895	6.46999
ARL6IP1	11.7192	11.3118	12.3236	10.4004	10.7916	10.9866	10.6793	9.73844	11.0557	10.8253	10.2809	10.2236	10.6194	11.1589	9.68395	10.3644	11.0491	10.0005	10.2809	10.7755	9.97607	11.403	10.4236	11.0557	10.9482	11.49	9.90015	10.8773	10.7699	9.97895	8.68207	10.5908	11.8281	10.3726	12.5187	10.7343	10.4307	9.90592	10.1232	9.37391	10.166	9.86769	9.76558	9.77024	9.61312	10.3365	9.78732	9.78732	10.0623
ARSB	3.50327	3.72396	3.40057	3.96557	3.7245	3.61091	3.43139	3.78734	4.23068	3.88026	3.85954	3.64392	4.26431	3.89304	3.98993	3.62954	3.7563	3.94629	3.8161	3.97814	3.80236	3.92017	4.03915	3.70756	3.61403	3.70706	3.82287	3.4575	3.65902	3.41684	3.61693	3.63479	3.66024	4.02105	3.85222	4.31051	4.15558	3.8748	4.23698	4.00641	3.63139	4.05613	4.01011	3.94684	3.86997	3.82848	3.74877	3.69645	4.1052
ASGR1	3.73093	3.81237	3.74958	4.21312	3.72552	3.76559	3.71219	3.68774	3.67285	4.19746	3.9286	3.7431	4.26541	3.6123	3.9617	3.60736	3.8737	3.67353	4.49349	4.13108	3.60736	3.67852	3.98324	3.59639	3.72628	3.5903	3.72203	3.51636	3.88908	3.72654	4.0238	3.61569	3.66836	3.67497	3.67015	3.76535	3.8317	3.8598	3.98193	3.73394	3.66861	5.08865	3.96695	3.86507	3.70502	3.76275	3.92017	3.67307	3.54923
ASGR2	4.29174	4.69119	4.65701	4.93578	4.30083	4.21005	4.85682	4.58075	4.31272	4.6368	4.65432	4.30742	4.64829	5.01831	5.18428	4.34564	4.5813	4.64801	4.66202	4.50993	4.65184	4.65288	4.69389	4.68142	4.80155	4.1096	4.91022	4.5782	4.66905	4.6699	4.7877	4.64575	4.19432	4.67705	4.37702	4.60622	5.13244	4.71758	4.87705	4.80902	4.73631	4.72477	3.64076	5.06564	4.76034	4.76899	5.19704	4.69418	4.77619
ATP6AP2	7.63903	7.79359	7.62409	7.89843	7.91709	7.77859	7.92038	8.10164	8.10028	7.95905	7.79112	8.01373	7.81088	7.92165	7.32861	7.62031	7.94073	8.04067	7.97855	8.11881	8.05722	8.16041	7.99632	8.13481	7.62948	7.76967	8.20229	8.2367	7.83632	7.67314	7.81259	8.18546	8.38397	8.42465	8.22395	8.3633	7.88706	7.70849	8.24706	8.20155	7.44024	8.04134	7.4481	7.62895	8.09179	8.11281	7.96875	8.10793	7.41923
ATP6V0A2	4.58157	4.46533	4.25131	4.44748	4.8118	4.26078	3.71893	4.40619	4.30109	4.16523	4.09801	4.48898	4.15395	4.6573	4.58898	4.79353	4.49604	4.38362	4.29102	4.39738	4.36091	4.17633	4.42297	4.14046	4.33365	3.95344	4.16894	3.82819	4.50225	4.20126	4.20549	4.63258	4.24305	3.95893	4.46243	4.02354	4.3987	4.42492	4.34097	4.57909	4.67863	4.33523	4.22395	4.50858	4.5854	4.36206	4.20726	4.26516	4.10187
ATP6V1A	7.99324	8.26521	7.83759	8.70999	8.5576	8.57588	8.44992	8.22685	8.64227	8.76149	8.88823	8.37963	8.60424	8.4326	8.62547	7.94245	8.73483	8.67145	8.59975	8.83133	8.66478	8.42385	8.98658	8.7166	8.19433	8.536	8.65151	8.43682	8.80716	7.96218	8.422	8.88823	8.64943	8.66268	8.04134	8.59275	8.76677	8.3501	8.89685	8.42465	8.49947	8.5778	8.16573	8.26284	8.6335	8.45492	8.25388	8.39891	8.39551
ATP6V1E1	9.20297	9.3273	9.04591	8.42642	8.67755	9.3906	9.7129	9.35206	9.48303	9.03714	9.47919	9.13318	9.36433	8.25841	8.19284	9.79463	9.46677	8.65852	9.32213	9.92327	8.77252	8.54877	9.02113	8.91907	8.95953	8.79859	9.00668	8.79631	9.20818	9.18399	9.76761	9.39757	8.57978	9.18553	8.84256	8.91163	8.70143	8.58983	9.19008	8.93469	8.71326	9.39419	8.20229	8.26908	8.88074	8.74816	8.01649	9.35406	8.02915
B3GALNT2	5.04119	4.90556	4.66456	5.77804	5.12301	5.01312	5.08349	4.69309	4.52028	4.64493	4.97045	5.00662	4.90879	5.37347	6.64803	5.13406	4.71205	5.46024	4.80407	5.286	5.13673	4.74738	4.62173	5.00071	4.85985	5.37165	4.47181	5.54198	5.00479	4.71341	5.16072	4.82764	5.1446	5.25905	5.06216	5.38466	5.76878	6.28624	5.18683	5.12378	5.17188	4.71843	6.86371	5.95374	5.14618	4.82238	6.67215	5.14696	6.58994
B3GALT1	2.90427	2.91308	2.89451	2.9353	2.91738	2.92387	2.91606	2.96101	2.91583	2.91694	2.89365	2.92285	2.94586	2.90603	2.91627	2.89083	3.02399	2.9394	2.92519	2.90154	2.91716	2.90876	2.9394	3.08978	2.9891	2.89471	2.89682	2.98987	2.94823	2.90965	2.90315	2.91164	2.92344	2.93213	2.9167	2.90089	2.91826	2.89791	2.93675	2.9167	2.90471	2.91606	3.30338	2.91738	2.93381	2.94766	3.49679	3.34996	2.96811
B3GALT2	3.02277	2.74707	3.31736	3.86005	2.64524	2.76917	2.76435	3.18073	2.65845	2.91052	2.69971	2.82043	2.776	5.55134	2.67176	4.89578	2.71401	3.66694	3.42526	3.03928	3.25122	2.96141	2.85454	2.70494	5.054	3.37884	3.457	3.26777	2.85411	2.64104	2.72643	3.45992	3.01185	2.65514	3.09277	3.21195	5.3032	3.38226	3.29762	3.15552	3.86396	3.92889	3.41001	3.40459	3.53996	3.2616	2.96726	3.37695	3.1535
B3GALT6	5.09362	5.47458	5.5417	5.38646	5.06112	5.30981	5.29292	4.98013	5.07826	5.52967	5.56482	5.09967	5.30348	5.18917	5.46132	5.33779	5.16768	5.45712	5.04143	5.46212	5.19809	5.14067	5.34765	5.01048	5.23774	4.82521	5.2778	4.96849	5.33039	5.5083	4.99222	5.24769	5.37008	5.1851	5.5237	5.29396	5.50422	5.75611	5.28027	5.68405	5.03039	5.62598	5.76424	5.30907	5.3884	5.27429	4.72842	5.47944	5.86043
B3GAT3	5.35101	5.35262	5.34894	5.33551	5.50104	5.40462	5.40491	5.47278	5.13773	5.39632	5.41659	5.10473	5.24218	5.7294	4.92951	5.26506	5.36695	5.48142	5.30189	4.84036	5.90371	6.1466	5.60939	6.08286	5.73757	5.43152	5.98248	5.64707	5.54221	5.98277	5.78675	4.79597	6.13132	5.77804	6.44673	6.14033	5.44515	5.82399	5.61616	5.55719	4.87628	5.32242	5.6608	5.47278	5.67735	5.8902	5.56536	5.93694	6.5398
B3GLCT	4.66175	5.2217	4.72255	4.76009	4.78441	5.14434	4.49291	4.92018	5.27138	4.70884	5.02209	5.13827	4.95296	4.24817	4.71205	4.47152	5.23801	4.8001	5.11057	4.86755	4.71843	4.94234	6.00987	4.60275	4.37151	4.8001	4.80902	4.68433	4.75673	5.06835	5.18842	4.68812	4.42324	5.86104	5.07555	5.05038	4.7083	4.61298	4.85172	4.58463	4.76061	4.58463	4.96608	4.95221	4.56494	4.48181	5.16883	4.74188	4.91582
B3GNT2	5.95016	6.0237	6.11181	6.02729	6.34125	6.19752	5.56147	5.73539	6.22356	6.39421	5.96335	6.17817	6.04741	5.79036	5.62541	5.61698	6.15802	6.1195	5.99241	6.21552	5.91014	6.59869	6.2205	6.47572	5.68237	6.71298	5.88293	5.9203	5.87458	5.6348	5.71725	6.17222	6.14689	6.69464	6.38733	6.42397	5.81865	6.92758	5.91785	5.58821	6.13765	5.30645	7.78443	6.82304	5.74637	5.9665	6.73554	5.82835	7.25859
B3GNT3	7.56498	7.84337	7.83031	6.12129	7.36544	8.28329	8.66943	6.37926	7.65166	7.07198	7.3366	7.28536	7.09515	7.73568	5.27138	7.60989	8.05526	5.8846	6.40436	6.43621	6.40767	7.36869	6.9893	8.39304	7.04467	8.35853	6.46027	7.33889	6.29248	8.04342	8.30634	6.77215	8.58888	8.17801	8.44821	5.86923	5.65354	5.42916	5.70319	4.80457	7.12194	4.60762	6.33848	7.21977	4.87418	5.72681	4.00587	5.67052	6.91572
B3GNT4	5.06342	5.02345	4.92951	5.04253	4.8331	5.14755	5.5503	5.04872	5.00398	4.97147	4.80436	4.99111	5.07986	5.14942	5.29396	5.03334	5.65756	5.04688	4.97957	4.89694	5.01264	5.0574	5.01238	5.4147	5.13904	5.90154	5.0372	5.33228	4.98469	4.97871	5.10951	4.99377	5.01457	5.16854	4.7007	5.10439	5.13904	5.79453	5.15313	5.78562	5.16653	5.09663	5.60071	5.16552	4.90074	5.06398	5.5539	5.28987	5.56432
B3GNT5	5.73565	5.73052	5.40297	4.69529	5.88379	5.77513	6.18264	5.42989	6.12447	6.35028	5.99266	5.96049	5.96189	5.23774	5.25257	5.30014	5.49774	5.47588	5.686	5.86411	5.58226	5.8714	6.4773	6.38702	5.63257	6.11891	5.69406	5.6052	5.79194	5.69084	5.76374	5.64208	5.94538	5.76995	6.78788	5.48572	4.79955	5.46665	5.34869	4.72391	7.47152	5.46427	5.11197	4.80675	5.00071	5.30116	5.30856	4.66759	5.12702
B3GNT6	5.44644	5.28547	5.21038	4.11628	6.794	4.16172	4.86781	3.63139	5.37735	4.34901	3.57527	4.83556	3.89597	4.16659	4.24113	4.98201	4.34344	3.98218	3.78389	4.26845	4.15423	4.16285	4.12005	4.26712	3.93786	5.45888	4.93412	4.4082	4.20624	4.41544	3.8126	3.95295	4.92352	3.82453	4.50444	4.30635	4.09003	4.1906	4.10632	4.01448	4.75448	4.09692	4.66367	4.5094	3.73446	4.00905	4.52416	4.40001	4.56974
B3GNT7	5.191	5.54943	5.5812	5.27405	5.55875	5.05345	5.13955	4.57481	4.8533	4.94377	4.51408	5.15233	5.28058	4.4505	4.93967	5.02683	5.2448	5.16046	4.77463	4.78247	4.55843	5.57084	4.43866	5.41416	5.99496	5.87593	4.52028	4.96503	5.09689	5.21789	5.82718	4.32425	5.47511	5.0574	5.07046	5.1591	5.44373	5.2317	4.79984	3.80055	5.62248	4.33142	4.90804	5.02903	3.89957	4.58157	5.39164	4.55651	5.6065
B3GNT8	4.62149	5.11784	4.72035	4.42297	5.03878	4.95404	4.16711	4.53694	4.53379	4.79159	4.58516	4.64463	5.53589	4.91935	4.75531	4.67863	5.24011	4.56549	5.06085	4.58489	4.76843	4.627	4.86435	5.37298	4.82896	5.67233	4.80816	4.71584	4.93826	4.62503	5.60758	4.13545	4.92594	5.20135	4.83446	4.58019	4.64156	4.65265	4.64493	4.63766	7.24594	4.55125	4.14816	4.59733	4.94426	4.29799	4.87786	4.63912	4.32957
B3GNT9	5.7934	6.13477	6.22023	4.9672	5.84196	6.56287	7.22701	6.80782	5.81526	6.40645	6.55156	6.43531	6.59977	5.92403	4.95551	6.04889	6.18292	6.23328	6.03906	6.46248	6.3008	6.15407	6.2495	6.56287	5.50607	5.9654	6.58284	6.06911	6.02187	5.85988	5.20852	6.6997	5.05159	6.51131	6.02614	5.31999	5.59279	4.43866	6.62888	6.97255	5.2144	6.25686	5.4289	4.5976	6.9996	6.26205	5.58683	6.50188	5.09082
B3GNTL1	5.12623	4.95322	4.86863	4.36564	4.75073	5.2599	4.95322	4.86378	5.47003	4.98953	5.07475	5.07877	5.07583	5.68927	4.93304	5.04556	5.01398	4.95738	5.29499	4.79573	5.11241	5.14861	5.39476	4.81687	5.18631	5.13853	4.85492	4.39436	4.96994	4.97175	5.27535	5.05609	4.86018	5.09334	4.90664	4.95431	4.41881	4.63399	4.71475	5.22421	4.40202	5.15149	4.58677	4.93328	4.83367	4.88362	4.33551	4.8495	5.18969
B4GALNT2	3.10791	3.18793	3.2061	3.0801	3.12105	3.37862	3.13728	3.12162	3.1124	3.13128	3.1154	3.21337	3.12015	3.12203	3.12085	3.22111	3.11777	3.14063	3.13785	3.12695	3.16145	3.13409	3.173	3.20568	3.31484	3.06846	3.12142	3.06342	3.1249	3.33895	3.11696	3.16662	3.12105	3.31274	3.13128	3.25606	3.08188	3.06382	3.13089	3.1247	3.13982	3.11018	3.02336	3.01602	3.04253	3.17933	3.02991	3.10455	3.97333
B4GALT1	5.29424	5.64731	5.51725	5.46106	5.91145	5.58548	6.46309	5.19587	5.67262	5.3693	5.56831	5.36817	5.49542	5.40692	5.56647	5.5508	5.5508	5.94406	5.56404	5.58764	5.57108	5.97368	6.69078	6.04712	5.7992	5.74061	5.67206	5.71251	5.83167	5.9012	6.76497	5.49127	5.45487	5.8383	6.4089	6.02729	5.2507	6.38083	5.64977	5.8973	5.28226	5.46106	6.11207	5.9716	5.94851	5.88379	6.05601	5.62651	6.26979
B4GALT2	7.65057	7.17334	6.88414	7.2727	6.42854	6.5835	6.51766	6.512	5.84821	6.18153	7.01825	6.1646	6.51937	6.66864	6.34464	6.45939	6.78561	6.38021	6.51835	6.35662	6.44325	6.30015	6.48593	6.41259	6.4279	6.26979	6.54595	6.34842	6.49086	6.81776	6.63919	5.52419	6.54922	7.14818	6.95591	7.33037	6.92978	7.11299	6.41144	6.50459	5.74553	6.92978	6.95661	6.8151	6.77857	6.36995	6.98146	6.23236	7.6434
B4GALT3	5.39556	5.35683	5.4024	5.50799	5.59145	5.55985	5.59461	5.08567	4.97334	5.07555	5.21094	5.18711	5.74553	5.56043	5.45171	5.03124	5.0737	5.12968	5.00398	5.0715	5.07231	5.2217	5.06216	5.10901	5.07826	5.58683	5.07555	5.1635	5.21894	5.23824	5.80369	4.85004	5.46159	5.12867	5.14778	5.15453	5.29341	5.50189	5.15654	5.04956	5.19755	4.94234	5.70688	5.59491	5.0852	5.13984	5.50422	5.0737	5.96787
B4GALT4	8.5228	7.28846	9.40336	7.21185	7.93418	8.49415	9.8071	7.21497	7.22959	7.69974	8.79066	7.6638	8.2396	6.42633	7.01617	8.23202	8.08276	7.22062	7.46523	8.39712	7.05111	7.62361	7.9272	8.66268	7.63398	8.39224	7.49709	7.60624	7.71302	8.06865	6.95468	7.81199	8.50953	8.20302	8.08602	7.63398	7.17914	7.10339	7.01033	7.14256	7.3472	6.7757	6.83005	7.52021	6.70681	7.08398	7.46429	7.09296	7.11934
B4GALT5	8.3666	9.42852	8.46278	7.10558	8.00817	8.04134	8.44557	8.45075	7.79359	8.6596	8.50229	8.47965	8.95291	8.35522	6.64765	8.49142	8.17801	8.6485	8.67518	7.91522	7.94073	7.90957	8.82156	8.79739	9.23126	8.74816	8.21339	8.24936	8.00937	9.63295	10.0277	7.79529	9.0472	8.6616	8.73594	8.24788	7.26657	7.91138	8.41516	7.55537	7.72109	8.15973	7.18887	7.16323	7.66981	7.69483	7.45537	7.99683	6.66265
B4GALT6	4.22926	4.0835	4.43266	4.38612	3.9902	3.77282	3.90713	4.16921	4.03833	4.29379	3.90291	4.17761	3.86782	3.99974	4.43638	4.33912	4.74215	4.29943	4.3512	4.27892	4.20843	4.22121	4.7228	4.02136	4.44222	3.79353	4.67676	4.10136	4.4633	4.02994	4.51053	4.44554	4.33064	4.13301	4.32517	4.37122	4.28642	4.17606	4.32789	4.30357	5.0829	4.23155	3.61115	4.08618	4.35177	4.34154	3.71461	4.29102	3.98433
B4GALT7	6.57913	6.28652	7.10218	5.95633	5.62967	6.49549	6.96584	6.12734	6.229	6.28473	6.04024	6.13336	6.00152	6.67501	5.7616	5.7591	6.05299	6.0788	6.03694	5.68405	5.96189	6.22685	6.30304	5.96787	6.82304	6.07817	6.07581	5.86329	6.2647	6.53683	5.98776	5.627	6.76603	6.35628	6.01156	6.19148	5.91145	6.27707	6.21455	6.4535	5.72462	5.9932	6.45904	5.78618	6.26171	5.87034	5.59878	5.96218	6.56287
B4GAT1	6.13797	5.5391	5.81277	6.31485	5.79222	5.69876	6.11978	5.85962	5.70208	5.67233	5.77886	5.60888	5.57798	5.73432	5.49995	5.70859	5.71474	5.63891	5.67814	5.68185	5.65784	5.48998	5.78866	5.62625	5.75582	5.49231	5.56043	5.7726	5.61535	5.57541	5.79873	5.97191	5.85736	5.60337	5.55371	5.98156	6.34623	6.31547	5.78453	6.52243	6.19023	5.92843	6.27311	6.35502	5.96388	5.7004	5.88092	5.98132	6.72582
BCAN	4.6127	3.99774	4.64519	4.13301	4.26377	4.34564	4.921	4.03973	4.269	4.24786	4.27948	4.16659	4.44612	4.47066	4.24564	4.25755	4.35233	4.0354	4.06037	4.16389	4.08243	4.51382	4.34706	4.23248	4.16894	4.67076	4.14291	4.12333	4.19029	4.25243	4.82208	4.13139	4.10187	4.17846	4.13301	3.94119	4.35668	4.44305	4.19508	4.30325	4.49946	4.11593	4.13351	4.13683	4.1057	4.23388	4.3108	4.12165	4.06371
BET1	6.92723	7.14729	7.76623	8.43599	8.16511	7.97331	8.3334	7.58274	7.88047	7.85982	8.11416	7.55537	7.75159	7.42699	7.91842	7.20706	7.68975	7.75973	7.39681	7.82308	7.3664	7.57659	7.37517	7.84287	6.94899	8.06194	7.65329	7.41835	7.41276	8.87391	8.10097	8.26521	8.09361	7.71931	7.66653	8.29913	8.08407	7.59921	7.47016	7.86216	8.17736	7.42889	7.98162	8.45158	7.43579	7.69197	8.23122	7.60935	8.86908
BET1L	5.84573	5.69709	6.04772	6.21491	6.23609	6.52209	5.7178	5.90982	5.55822	5.92765	6.00038	5.49176	5.6249	5.45784	5.34588	5.65381	5.88009	6.02088	6.00701	5.38756	6.02987	6.54922	6.04598	6.19986	5.88668	6.13477	6.21723	5.32055	6.04804	6.01935	6.77453	5.55319	6.18626	5.74061	6.47905	6.17486	5.99808	5.85055	5.79222	5.3667	5.7819	5.69576	6.11802	5.8684	6.14369	6.07457	5.70068	6.0237	7.03488
BGN	8.36837	9.08932	8.47079	7.05812	7.20062	9.54371	8.73822	9.93246	8.6112	8.76677	9.28095	9.01318	9.59322	7.15162	6.63372	8.83804	9.25942	9.39238	9.82268	8.88823	10.3219	10.1558	10.0982	8.94919	9.17787	8.86505	10.288	8.47526	9.85754	9.93246	8.23364	9.00007	9.08366	10.2001	9.6396	9.56885	7.10837	6.19668	9.95305	9.13625	4.45933	8.422	6.62696	7.4339	9.90592	10.3103	9.04992	9.9116	6.42268
C1GALT1	7.65499	7.09469	7.25477	5.76136	6.95352	7.43579	7.98667	7.1578	6.53649	6.73693	7.52958	7.89843	7.83574	6.85156	5.61481	7.53999	8.55067	6.02154	6.32562	7.24952	7.14895	6.97837	6.71514	6.84328	6.74374	8.12512	6.80065	6.80675	6.79214	6.71171	6.22475	7.6317	7.29254	7.33519	7.85623	6.34377	5.54885	5.57163	5.69084	6.38605	6.52861	6.10557	5.36464	5.84223	6.25658	5.78755	5.45364	5.62725	4.81659
C1GALT1C1	6.38021	6.36592	6.48559	6.40193	6.73076	6.23665	6.29128	6.60785	6.51707	5.87618	5.65221	6.49311	6.51485	5.89046	6.35252	5.6803	6.54626	6.01717	5.84521	6.94776	6.22243	6.60078	6.18349	6.40252	5.89534	5.98248	5.77051	5.80922	5.74661	6.2103	6.69357	6.82197	6.32874	5.7384	6.09639	6.14396	6.28872	5.9392	6.03085	6.23236	6.19614	5.70886	5.81803	5.54247	6.03726	5.8725	5.73108	6.27866	5.98156
C1GALT1C1L	3.24894	3.52068	3.38313	4.34958	3.53556	3.80548	3.13291	3.3297	4.56073	4.31709	3.27975	3.77688	3.85143	5.79644	5.30481	4.12915	3.7529	3.52392	3.22281	3.07501	3.51259	3.94469	3.35554	3.43331	3.401	3.21097	4.39238	3.69545	3.47268	3.5117	3.33878	3.35245	4.03073	3.1962	3.0801	3.50888	4.16285	3.28419	3.69248	3.79698	3.41752	3.51992	3.65017	3.58412	3.95872	3.7431	3.02157	4.23388	3.79406
CA4	4.16117	4.1308	4.17932	8.07426	4.1157	4.1297	4.09388	4.25243	3.90425	4.01448	4.09915	4.10931	4.19087	4.17149	4.39436	3.9761	4.01147	5.30536	5.30671	4.01124	4.96875	4.14542	3.97636	4.29597	4.02893	4.12165	5.49745	6.42397	4.38224	3.88336	4.16583	4.16785	4.27948	4.22178	4.15065	5.81526	7.7886	7.93621	4.17959	4.19803	5.0339	4.42192	7.28167	7.47814	4.16759	5.60206	7.55065	5.79588	7.05932
CAD	4.76373	4.55899	4.74274	4.67705	4.92982	4.86071	4.87087	4.92731	4.37265	4.63939	4.89441	4.75266	4.70749	5.64921	5.09388	4.72894	4.87525	4.7396	4.60362	4.38202	4.86895	4.97386	4.8506	4.81987	5.12113	5.15206	4.83634	4.39183	5.03691	4.96636	5.65756	4.29174	4.78411	4.72035	4.78797	4.60275	4.87786	4.64973	5.07503	4.61668	4.701	4.69418	4.47272	4.85463	4.92461	4.97549	4.85033	4.85145	4.90313
CALR	7.73871	7.78095	7.70411	7.9247	8.06051	8.29215	8.15682	8.19146	8.07576	8.05329	8.25388	7.98273	8.4203	8.00877	8.45578	7.87394	8.25607	7.98737	7.96618	8.07653	8.52558	8.77942	8.66648	8.77592	8.8107	8.75714	8.69597	8.50229	8.67232	8.49233	9.11491	7.79287	9.13174	8.90792	9.25284	9.36433	7.90234	7.42699	8.20009	8.19356	8.01314	8.07576	7.40568	7.40568	8.56453	8.31583	8.32465	8.04743	8.84849
CANX	7.4786	7.60461	7.70849	8.41434	8.15188	7.81259	7.28261	7.52067	7.98667	7.90501	7.86905	7.58849	7.7363	8.14906	8.76357	7.30925	7.63682	7.96094	7.83213	8.50501	8.06194	8.1624	8.0821	8.09103	7.97668	7.86524	7.99632	7.74237	7.69197	7.90234	7.54839	8.06794	7.85357	8.13407	7.61272	8.25006	8.20009	7.84399	8.16178	7.81365	7.9834	7.75683	8.36009	8.16654	8.02915	7.99256	8.48256	7.78553	8.56919
CAPZA1	7.4706	7.96559	7.83385	7.56236	7.8616	8.00533	8.28485	7.91206	8.06794	7.95776	8.08276	7.81671	8.6596	7.84716	7.82967	7.06664	8.12992	7.84836	8.02169	7.86524	7.82845	7.82609	8.06865	7.97977	8.00937	7.86905	7.81724	8.33578	8.02512	7.54793	7.91842	7.83574	8.05526	8.37803	8.14401	8.10508	7.58221	7.56236	7.96218	8.17517	7.60624	7.95975	7.60083	7.14466	7.86905	7.8882	8.11749	7.83759	7.36168
CAPZA2	7.4412	7.68806	7.81088	7.46293	7.66919	7.98737	7.56236	7.78612	8.04134	7.7751	7.61696	7.6786	8.25462	7.59921	7.29108	7.64173	7.83698	8.01718	7.75433	7.44024	7.47503	7.94662	7.53782	7.97128	7.61327	8.46914	7.53726	8.40579	7.88408	7.04596	7.63848	7.78379	8.0626	8.52005	8.37963	8.08537	7.63573	7.61327	7.85982	8.08537	7.61593	8.00151	7.63848	7.65829	7.52228	7.60028	7.50324	7.60191	7.49498
CAPZA3	4.51053	2.83775	2.78484	2.79551	2.7984	2.79428	2.78227	2.79869	2.79714	2.95257	2.61208	2.76254	2.78131	2.80883	3.65284	2.79818	2.79225	2.78407	2.80508	2.80883	2.81031	2.83092	2.84036	2.83658	2.84547	2.71797	2.77572	2.70435	2.80203	2.76968	2.77811	2.78353	2.80303	2.76995	3.57616	2.75404	2.9394	2.78383	2.72582	2.84445	2.8028	2.79091	2.80581	2.84641	2.75266	2.81417	2.7448	2.76466	2.92703
CAPZB	7.64572	8.17736	7.74939	7.57512	7.57199	8.27528	7.7965	8.24706	7.99801	8.1505	8.20372	7.96748	8.28329	7.89501	7.09087	7.67973	8.12512	8.2659	8.24706	7.70787	8.32548	8.11281	8.37634	8.40315	8.3535	8.49674	8.30171	8.50773	8.42992	8.3404	7.33216	7.72459	8.3071	8.87944	8.36755	8.45075	7.76568	7.28351	8.25841	8.16573	7.61743	8.23122	7.40073	7.48183	8.34125	8.05009	7.89843	8.1687	7.37953
CASQ1	2.93593	2.93793	2.93403	2.97233	2.93403	2.92201	2.92323	2.93001	2.94606	2.94968	2.93299	2.93089	2.926	2.92895	2.90494	2.92285	2.93045	2.92855	3.09445	2.86963	2.95893	2.93675	2.94481	2.94626	2.94003	2.91073	2.92176	2.91204	2.94003	2.92621	2.90748	2.93837	2.89533	2.89903	2.92703	2.94356	2.8307	2.8857	2.85777	2.91903	3.88653	2.90089	2.8949	2.83732	2.89946	2.90069	2.80681	2.89191	2.82302
CCDC115	7.80312	8.06469	7.64285	8.01373	7.95117	7.77917	7.52646	7.50577	7.65606	7.66152	7.71529	7.67254	8.13192	7.0704	7.88408	7.31707	7.92409	7.86706	7.73158	7.85494	8.46741	8.02308	7.82245	8.06326	8.02053	7.36688	8.11617	7.98527	7.74874	7.99868	7.66865	7.64949	8.36755	7.65381	8.02722	8.02169	7.73748	6.7162	7.69699	7.32055	7.6025	7.4634	7.22521	7.16456	8.15325	8.36567	7.58691	7.84836	7.76454
CCDC47	8.81911	8.42992	8.88321	8.96613	8.82472	9.079	9.08213	8.27213	8.58179	8.60538	8.41162	8.3609	8.73594	8.74376	8.2224	8.69054	8.15893	8.50773	9.33935	8.57685	8.32771	8.69486	7.69246	8.28965	8.87278	8.87944	8.25006	8.50953	8.59777	8.33264	8.25607	8.7166	8.98781	8.23202	8.74816	8.69383	8.90287	8.83911	8.53873	8.43508	9.24306	8.14191	8.7771	8.77942	8.15539	8.41946	8.77592	8.4134	8.91038
CD55	10.6	11.2021	11.7192	7.14466	13.0243	10.9259	12.5637	9.19823	10.0558	9.61513	8.75714	10.1232	10.509	7.97331	7.40176	11.9951	10.914	9.5026	9.96759	12.1969	9.25466	9.21743	10.4543	10.6982	10.5264	10.6982	9.75331	8.86644	11.4321	10.9927	8.96761	9.52485	9.4587	11.083	9.68133	8.83359	6.88568	7.7136	8.13481	8.24936	9.59322	8.19598	7.72625	8.11617	8.48594	8.23202	7.18887	8.00937	6.92293
CD59	9.70509	10.149	10.4621	9.63523	9.05732	10.3219	8.43161	9.51993	10.0217	9.61312	10.0851	9.47919	9.54551	9.98226	7.83821	9.97034	10.483	9.85499	9.83362	9.98527	9.66929	10.0558	9.60417	10.2001	9.62394	9.59549	9.78984	10.1232	9.53543	9.67914	10.1433	9.94129	9.42319	10.0469	10.4198	9.63295	9.74087	9.76761	10.0408	9.51206	7.96748	9.59994	9.21123	9.42481	9.39956	9.84079	9.47085	9.89205	9.37029
CDKAL1	3.91648	4.08191	3.53885	4.56349	4.38808	4.32425	3.73686	3.83889	4.60275	3.96061	3.51792	4.31106	4.15779	4.68725	3.90894	4.11486	4.24383	3.93962	3.37543	4.88625	4.59846	3.8376	4.2804	3.56158	4.00381	4.12496	4.56524	3.94798	4.02002	4.11774	4.82659	3.94875	3.68592	4.22204	4.17711	3.02892	4.12464	3.8831	4.10023	4.00112	4.15886	3.5817	4.10356	4.28156	4.39266	4.14236	3.66836	4.06854	4.67348
CFP	4.52309	4.54779	4.55817	4.80269	4.50168	4.58569	4.36401	4.70494	4.8755	4.47297	4.52309	4.38172	4.64266	4.63173	4.47407	4.47578	4.49433	4.56101	4.47407	4.5	5.25205	5.31746	4.77596	4.4687	5.02298	4.76373	5.33938	4.65836	4.74552	5.09774	4.68947	4.58183	4.33774	4.25161	4.835	4.58569	4.5695	4.69529	4.51109	5.18399	4.57643	4.50993	4.90773	4.71368	6.1219	5.32242	4.87112	4.64239	4.82436
CGA	3.45152	3.18898	3.1935	3.2913	3.70933	3.20523	3.39796	3.21317	3.19777	3.15572	3.2103	3.20816	3.20311	3.18091	3.24161	3.23707	3.19598	3.17693	3.21564	3.26033	3.20673	3.23066	3.19637	3.19371	3.22111	3.14478	3.19701	3.13745	3.22129	3.32515	3.19939	3.18258	3.18693	3.23443	3.15817	3.17503	3.15756	3.214	3.20931	3.21218	3.20736	3.2059	3.63881	3.22193	3.23086	3.23323	3.39554	3.22723	3.23109
CHP1	8.75275	8.68098	8.51216	8.14906	9.18698	8.39152	8.84622	7.0968	8.45732	8.18687	7.77799	8.00668	7.73748	6.78748	7.05188	7.71694	7.85223	8.13481	8.11617	8.64227	7.75159	8.20669	7.79705	7.88283	8.70999	7.41459	7.67758	7.59071	7.8007	7.13514	8.45253	7.29721	7.95596	8.2261	8.47526	8.13481	8.12037	7.33977	7.67433	6.88264	8.92133	7.60672	8.03048	7.58691	7.42841	7.73092	7.57092	7.12728	7.9103
CHST10	4.8287	4.64889	4.86126	5.11318	4.85278	4.92407	5.35766	4.94159	4.89604	4.79187	4.91935	4.80269	4.715	5.16627	5.6159	4.87525	4.84924	4.82684	4.81463	4.70633	4.86924	4.84792	5.0826	4.85933	4.8582	5.02023	5.03334	4.98494	4.90206	4.85089	5.26237	4.87628	4.49177	5.08835	4.5785	4.69844	5.03584	5.26091	4.96581	5.09527	4.60568	4.93687	5.10273	5.0826	5.00692	4.92843	5.35463	5.23848	5.20049
CHST14	6.25626	6.63017	6.41486	5.95099	6.15557	6.44801	6.68348	6.82965	6.22073	6.38395	6.27065	6.30274	6.26888	5.3479	5.72656	6.29308	6.14369	6.618	6.60384	6.12878	6.88531	6.48109	7.32145	6.54211	6.83706	5.66438	6.69291	5.50888	6.18292	6.24512	6.8054	6.00291	6.53383	6.53262	6.39814	6.87975	6.42854	5.67074	6.9393	6.77453	5.04143	5.50607	5.48212	5.69466	7.07435	6.58438	5.8902	6.77927	7.23303
CHST3	4.40543	4.50366	4.48811	4.62669	4.72507	4.69813	4.16365	5.03362	4.63591	4.83421	4.62254	4.50256	4.73577	5.18376	4.44136	4.94838	4.51767	4.50021	4.71782	4.65619	4.66933	5.13545	4.81064	4.82606	4.65001	4.05722	4.85523	4.99432	4.63199	5.19324	5.25932	4.55761	4.80541	4.53864	4.92381	4.64944	4.72255	4.69873	5.4289	4.85172	4.53667	4.82947	4.87329	4.58869	4.80269	5.05688	4.56868	5.35575	4.77169
CHST4	6.88338	8.3633	9.08519	8.09631	3.91595	8.22033	6.71759	6.12955	6.2647	5.40164	7.43436	7.18477	6.1228	6.20668	4.8415	5.59013	7.72167	6.66653	7.43579	7.48572	7.9834	5.70935	3.51129	8.76474	8.62257	8.95829	6.53128	8.79406	5.37323	6.16661	5.12326	6.32812	7.19784	8.57978	7.20267	5.34041	9.01702	6.42143	6.58438	4.07613	3.27712	7.27006	6.94339	4.96744	4.61812	6.95661	6.57407	7.31197	5.94119
CHST6	3.55499	3.59683	5.60445	3.42617	3.55882	3.80681	4.83662	3.53885	3.56439	3.55236	3.55549	3.7972	4.23698	3.55615	3.40847	5.11483	4.77142	3.56276	4.76703	3.58368	3.70229	3.57169	3.85222	3.54588	3.37307	3.48961	3.53996	4.20465	3.56439	3.68869	3.40672	3.51484	3.53689	3.52626	3.55301	3.52181	3.41041	3.42617	3.38226	3.57459	6.87293	3.3443	3.45458	3.45888	3.3512	3.35935	3.44591	3.55212	3.46961
CHST8	5.09935	4.84178	5.11805	4.89244	4.81625	5.00286	4.65647	5.05455	4.77783	5.05688	4.19215	4.71527	4.77142	4.85763	4.87987	4.74709	4.79955	4.74821	4.90879	4.81687	4.27593	5.20643	4.77224	4.79382	5.14994	5.43544	4.76985	4.68976	4.91254	4.79926	5.75717	5.10559	4.86407	4.86553	4.50831	4.78522	4.8658	5.91569	5.13383	5.44775	5.12678	5.05908	4.71555	5.01939	5.2596	4.98923	4.98732	4.91332	5.15582
CHSY1	6.53614	6.70647	6.7828	6.48817	6.59439	6.88086	6.97837	7.14126	6.90535	6.93514	7.09722	6.82642	6.99011	6.47096	6.37857	7.00078	6.89712	6.93107	6.97524	6.90535	6.6997	6.77106	7.16238	6.69324	6.99324	6.82828	6.83116	6.88671	7.16669	6.75561	6.40373	7.19927	6.74152	7.04237	6.96669	7.02602	6.28838	7.09217	7.16584	7.50924	6.22778	7.00913	6.63781	6.78314	7.18932	6.73242	6.85957	7.17407	6.38487
CKAP4	6.80392	7.09813	6.30989	6.88606	6.86371	6.7508	6.95742	7.16916	7.04388	7.07161	6.96969	6.73626	7.13305	6.45646	7.88767	6.9651	6.97798	6.97639	6.53915	6.40343	6.58632	6.62298	7.23178	6.91189	6.76009	6.8472	6.86847	6.38021	6.70245	6.88868	7.10132	6.8494	6.5247	7.02125	6.50284	6.81158	6.71514	6.57547	7.16411	7.11094	6.21491	6.65235	6.80609	6.85884	7.10932	6.45904	6.74555	6.63372	7.48859
CMAS	6.64209	6.52374	6.29276	6.59836	6.32437	6.32784	6.88708	6.37054	6.57407	6.29905	5.90288	6.48752	5.85521	6.66031	7.17732	6.58924	6.32692	6.56669	6.01686	6.44863	6.13336	6.7452	6.24041	6.70997	6.06568	6.64437	6.22124	6.94649	6.31706	6.24794	6.00788	6.76996	6.16891	6.4571	6.33435	6.42884	6.63469	6.80356	6.08484	6.43077	7.21497	5.94796	7.16791	7.10728	6.20731	6.05061	6.47972	6.11862	7.20316
CNIH1	8.90667	9.14051	8.76357	9.28779	9.32549	9.58836	9.36256	9.41981	9.85754	9.36623	8.83704	8.91038	9.86522	8.66556	10.0883	9.23822	9.75331	9.46056	9.28779	9.41262	8.79631	9.00668	9.19496	8.94141	9.12562	8.76149	9.19341	8.63852	9.13625	9.09198	7.48811	9.76761	9.43915	9.52923	9.30252	9.11326	9.20148	8.90667	9.15736	10.2001	9.27566	9.37029	8.39152	9.23468	9.10109	9.07009	9.00383	9.19823	8.51311
CNIH2	5.1013	4.8985	5.20775	5.79007	4.90262	4.7007	4.75757	5.41738	5.04477	4.835	4.86553	5.01884	4.915	5.01131	4.13516	4.5507	4.89062	5.03204	4.82973	4.03461	5.00635	4.90531	4.43377	4.89902	4.58812	5.11805	4.87303	5.17044	5.12173	4.96476	4.92677	5.01651	4.83081	4.96288	4.68812	4.87525	5.56147	5.48595	4.95491	5.2575	4.98813	5.12786	5.21628	5.1022	5.08066	4.97957	5.04794	4.98094	5.06535
CNIH3	4.08243	4.31106	3.88141	4.92124	4.14816	4.47066	4.92872	4.39974	4.627	4.41881	4.32929	3.94035	4.11628	3.44208	3.89247	4.11231	4.66456	4.20076	4.1057	4.33578	3.5817	4.40455	4.34987	4.44532	3.8463	3.62678	4.11655	4.37037	4.22869	4.11949	3.78539	4.23217	4.06633	4.71646	4.28481	4.75622	4.35811	4.67519	4.47012	3.84555	3.61091	4.59788	5.43182	4.21427	3.55057	3.87888	4.15779	3.54085	5.5191
COG1	4.59047	4.5925	4.55899	4.54315	4.73987	4.62335	4.64294	4.59569	4.54289	4.62279	4.45847	4.52362	4.55014	4.74851	4.60762	4.79731	4.40427	4.55707	4.71149	4.69093	4.67816	4.63508	4.65081	4.46898	4.86895	4.49205	4.45823	4.36654	4.65081	4.51359	4.86781	4.68582	4.47091	4.40512	4.64266	4.43409	4.50284	4.50194	4.55175	4.44162	4.69556	4.62952	4.64266	4.48434	4.64324	4.57674	4.39495	4.4673	4.8118
COG2	6.61628	7.36822	6.58284	6.04105	6.17222	6.50531	6.39453	5.98277	5.9649	5.60152	6.19958	6.512	5.81169	6.48109	7.7892	6.50568	6.46214	5.82309	5.77619	6.66096	5.75611	5.99549	5.54146	5.76904	6.08027	5.54097	5.59305	5.81361	6.2523	6.03547	6.26325	6.03012	5.94934	5.61451	5.40297	5.88544	6.49968	6.01464	5.88919	5.7979	5.85962	6.28899	6.13976	6.16345	5.92959	5.66186	5.79644	6.17881	6.29773
COG3	5.43152	5.50049	5.1645	5.51725	5.50991	6.10522	5.18453	4.96958	6.00069	5.14861	5.26961	5.32055	5.39529	4.74821	5.66157	5.28518	5.282	5.01398	5.26091	5.54069	5.19072	5.24244	5.20427	5.11599	5.27454	5.84876	5.12702	4.84764	5.21548	5.62303	5.77206	5.38893	5.57189	5.49774	5.51549	5.49542	5.42446	5.25503	5.33304	5.1635	5.32706	5.03472	5.51043	5.40636	5.22607	4.9975	5.07774	5.21303	6.17338
COG4	7.56607	7.69699	7.6511	7.32506	7.23951	7.7475	7.83385	7.76967	7.72921	7.37154	7.42259	7.57512	7.63231	8.29596	7.59974	7.7833	7.51876	7.1699	7.53216	7.15333	7.1303	7.36404	6.89566	7.04724	8.25462	7.39071	7.30925	6.46054	7.39931	7.51924	6.35067	7.31707	7.22148	7.09217	7.5735	6.83374	7.44454	7.01194	7.19221	7.24863	7.04921	7.47552	6.99534	7.03683	7.29626	7.14689	6.43474	7.24772	6.35028
COG5	6.54109	6.77891	6.65379	7.11051	6.55677	6.63197	6.85999	6.93592	7.11682	6.7179	7.0712	6.84979	6.90164	6.84793	6.94649	6.80356	7.03604	6.99997	6.64765	6.65518	6.85567	6.73554	6.73107	7.16282	6.79259	6.54626	6.65485	6.54353	6.91723	6.04433	6.76532	7.1707	6.78858	6.57609	6.95011	6.85452	7.18804	6.60649	6.61959	7.11388	6.68516	6.69813	7.38423	7.13147	6.95313	6.41725	7.37469	6.8845	7.74473
COG6	5.36388	5.48884	5.24642	6.02121	5.56482	5.52653	5.52704	5.46827	5.61946	5.19809	5.24244	5.47671	5.43517	5.14564	5.56294	5.17599	5.37533	5.45364	5.14889	5.40051	5.04981	5.08595	5.35709	5.22421	5.00937	5.56016	5.22607	5.51113	5.14727	5.11784	5.2294	5.43099	5.08496	5.41659	5.20558	5.64789	5.8444	5.61293	5.33807	5.52395	5.14324	5.35977	5.84848	6.68578	5.1346	4.91636	6.01935	5.23668	6.27898
COG7	7.40221	6.86565	7.48336	6.17122	6.79578	6.9594	7.40523	6.57741	5.72371	6.86673	7.00193	6.41587	6.69776	6.7373	5.76185	6.22445	6.98309	6.65313	6.69671	6.04349	6.78931	7.09515	6.6825	7.11432	7.5538	6.90011	6.86082	7.03235	7.16627	7.0388	6.70897	5.68322	7.1765	6.61165	7.32457	6.49051	6.3532	6.09314	6.1987	5.86018	6.41259	6.04243	6.40586	5.8754	6.50459	6.78713	6.15349	6.32495	6.65036
COG8	6.10816	6.14149	6.21962	6.72364	6.24731	5.59849	5.45838	5.88919	5.70461	5.57713	5.57025	5.77995	5.46976	5.87839	6.07401	5.96189	5.627	6.33094	5.84277	5.66217	5.85604	5.73483	5.54513	5.98496	5.55003	6.02641	5.78453	6.60749	5.91569	6.0671	5.22216	6.01746	5.86949	6.05484	5.81031	6.00348	6.58378	6.58186	5.82142	6.01852	6.22658	5.97795	6.676	6.95051	5.88635	6.11684	7.0233	6.05884	6.09122
COL7A1	5.53206	6.15234	6.35167	4.27837	6.44004	7.11892	5.42223	7.75323	5.73999	6.07115	6.83992	5.78368	5.23245	6.44643	5.34305	6.32874	6.64733	6.25866	5.53961	5.04119	5.5999	6.5129	5.25476	7.2638	4.77331	5.81472	6.82304	5.63287	6.23018	7.19784	5.82171	4.74019	6.00099	6.98104	6.62128	6.48722	4.97231	5.42814	5.99893	5.18895	4.86981	5.24589	5.13352	5.36161	5.58821	5.82804	5.60206	5.52318	5.26663
COPA	6.1481	6.20514	6.12929	5.83552	6.95313	7.21144	6.77106	5.98413	6.3087	5.89345	6.43387	6.45093	6.52665	6.72869	6.695	6.05714	6.03808	6.13452	6.01967	6.34125	6.30676	6.65165	6.49051	6.43971	6.56255	7.01194	6.17251	6.29739	6.48849	6.18904	6.93367	6.00322	6.53649	6.7273	6.64733	6.27341	5.70319	5.40768	6.18091	6.1875	6.12477	5.85491	6.13162	5.36958	6.38829	6.29989	6.11775	5.9237	6.36476
COPB1	8.58983	8.60738	8.36567	8.6485	8.73928	8.40667	8.29134	8.49327	8.59275	8.28168	8.57978	8.441	8.24706	7.83874	8.44367	8.52558	8.3666	8.49765	8.29596	8.71755	8.24181	8.67849	8.23524	8.62749	8.21414	8.53962	8.23276	8.62052	8.22544	8.21568	8.47251	8.53421	8.52005	8.42118	8.57411	8.61485	8.74816	8.62257	8.38488	8.61571	8.34125	8.8063	8.5294	8.62257	8.41782	8.49142	8.5778	8.40405	8.70684
COPB2	6.20483	6.09314	6.0937	6.87673	7.02167	6.42366	6.74976	6.1466	6.18964	6.25166	6.42366	6.09639	5.94348	6.05859	6.56038	6.06911	6.31547	6.10091	5.90613	6.36147	5.91041	5.82142	6.37544	6.50697	5.95999	6.40343	5.94678	6.50939	6.1547	6.43686	6.9096	6.57609	5.8714	6.19695	6.00759	6.59406	6.67534	7.00193	6.16891	6.49935	6.27008	6.1866	7.22659	6.63265	6.01373	5.91014	7.26521	6.46933	7.54053
COPE	6.14428	5.85661	6.15118	6.2161	6.3532	6.07666	6.34591	5.90585	6.17486	6.17279	6.20254	5.78421	6.02318	6.13503	6.82378	5.84168	6.10034	6.01631	5.96162	5.8391	6.1599	6.31081	6.07581	6.43531	6.45613	6.53649	6.14578	6.2611	6.18427	6.42917	6.73802	5.20455	6.00875	6.28044	6.08739	6.07056	6.16105	6.24191	6.35137	5.92547	6.47347	5.93326	6.37731	6.14842	6.30421	6.26171	6.46371	5.9048	6.40072
COPG1	7.34671	7.19742	7.30315	6.94575	8.03382	7.61908	7.75799	6.22778	7.40799	6.9594	7.75269	6.53157	6.84504	6.28404	6.62422	6.66625	6.88939	6.81583	6.86371	6.85767	6.80207	6.80933	7.40273	7.4294	7.06017	7.17864	6.79768	6.24829	6.93142	7.18041	7.6709	6.86331	6.45613	6.81191	6.83488	6.49902	7.26521	6.39485	6.86883	6.14092	6.82678	6.88939	6.70897	6.19958	6.99444	6.27034	6.68791	6.11346	6.6586
COPG2	4.04971	4.1085	4.0928	4.39068	4.09554	4.22424	3.91004	4.10435	4.11919	4.22563	3.85382	3.61693	3.70204	4.55393	4.71262	4.23277	4.15205	4.21867	3.87563	4.10461	3.58193	4.14654	4.11628	4.25073	3.9485	3.44652	4.24001	3.25266	4.1479	3.86944	4.3982	3.86062	3.86286	4.44917	4.23786	3.75262	4.23723	3.97661	4.04031	3.78539	4.00164	4.17365	3.36352	4.01525	3.83889	4.00801	3.75859	3.64288	4.18712
COPZ1	9.42481	9.10276	9.01573	9.95028	9.5026	9.15736	8.82804	9.17787	9.53345	9.15453	8.96076	9.01072	8.65335	9.42319	9.8814	9.21453	9.23126	9.06702	9.10585	9.01318	9.00668	9.00259	9.96759	8.88448	9.01702	9.32038	9.06566	9.09073	9.11326	8.97741	9.69214	8.87503	9.01702	8.73928	8.69931	9.21604	9.64446	9.40911	8.82156	8.66268	9.15146	8.69383	9.65594	9.68653	8.93231	8.93747	9.7129	9.03277	10.0408
COPZ2	4.87471	5.03878	4.93943	5.02076	5.01678	5.11145	5.29734	5.33278	5.27321	5.41173	5.37899	5.15728	5.48488	5.154	4.28008	5.00635	5.03981	5.32706	5.30536	5.194	5.42275	5.29608	5.57054	5.11891	5.02425	4.8755	5.43919	5.47034	5.18683	5.38332	4.70383	5.38756	4.61075	5.42088	4.97683	5.1727	4.95491	5.33651	5.29583	5.83333	5.10333	5.43461	4.9844	5.10582	5.99747	5.37505	5.326	5.26015	4.7701
CSNK1D	5.85851	6.56319	6.11684	5.61729	6.32052	6.066	6.30613	5.686	6.14092	6.06515	6.16631	5.80036	6.32593	6.0877	5.62362	5.83167	5.7634	5.69876	6.14311	5.55319	5.8029	6.11008	6.05626	5.87115	5.72995	5.95432	6.03966	5.94	6.1987	6.03639	5.96815	5.46321	5.99549	5.68797	6.21902	5.88484	5.46692	6.00407	5.71969	5.521	5.61046	5.70011	6.19614	5.76509	5.60783	5.68158	5.76052	5.47084	6.22385
CSPG4	3.83572	4.02304	4.23753	4.06316	4.34019	4.06662	3.91414	4.07812	4.03998	3.91414	3.97281	3.74615	4.16687	4.12333	4.13878	4.33472	4.01068	3.95846	4.07613	3.86646	3.65784	3.98836	3.73911	3.92414	4.15035	4.1988	3.85295	4.09996	3.9631	3.89826	4.0424	3.9527	3.79485	4.17791	3.86915	3.99104	3.93168	4.054	4.13824	4.50074	5.33465	4.08164	4.05534	4.03207	3.95243	4.00511	3.9864	3.92545	4.13712
CSPG5	3.52626	3.47378	3.49027	3.52392	3.47198	3.60094	3.95428	3.51725	3.76431	3.50778	3.8617	3.45847	3.49358	4.11832	3.84918	3.60186	3.80263	3.49944	3.47198	3.39904	3.48534	3.57335	3.51571	3.545	3.47175	3.52204	3.49679	3.45289	3.49239	3.88607	3.67401	3.45397	3.53623	3.55212	3.86589	3.83995	4.02407	3.79042	3.51769	3.49331	3.55125	3.59317	3.77533	3.80132	3.50841	3.54779	3.70379	3.62537	4.02657
CTSA	9.38698	9.63295	9.41262	8.52098	9.04151	10.4787	9.3594	9.8765	9.17154	9.81465	9.30411	9.44857	10.179	9.47517	7.92661	8.61299	9.72294	9.77998	9.69214	8.74376	9.38874	9.37029	9.35406	9.78732	10.3254	9.45485	9.74087	9.15003	9.52692	9.78233	10.6515	8.87716	9.80957	9.8489	10.0408	9.43232	8.94141	7.23686	9.77247	8.47526	8.63659	9.00668	7.51283	7.73748	9.45485	9.35003	7.85685	8.85428	7.58114
CTSC	8.32948	7.77744	9.73301	7.72509	8.41603	8.89685	9.50631	9.47719	8.61485	8.97059	8.75379	8.76149	9.16997	8.85085	7.31618	9.01702	8.63659	9.07735	9.1438	8.62844	9.42657	9.38348	8.65641	9.8814	8.51129	8.51032	9.39574	7.98213	9.19823	7.91775	7.93743	9.19173	8.72285	8.68533	8.7057	8.59681	8.20597	7.62787	9.16359	9.10871	7.81365	9.06296	7.28071	8.06935	9.71023	9.55581	8.05647	8.83704	6.45222
CTSZ	5.75078	5.75384	5.48756	5.52545	5.4206	5.58764	5.16211	5.67294	5.60594	5.62467	5.50345	5.52937	6.00436	5.83274	5.78562	5.72968	5.61563	5.81894	5.6652	5.52445	5.47084	5.76452	5.58604	5.68485	6.06057	5.61072	5.76681	5.29965	5.76211	6.09976	5.73272	5.56482	5.35463	6.23609	5.46186	5.66745	5.20775	5.19129	5.94152	5.76681	5.60543	5.84766	4.86378	4.76538	5.8902	5.58279	5.02425	5.23071	5.27482
CYBB	4.33089	4.42937	3.72072	4.96666	4.58047	4.65288	3.98941	4.80902	4.77542	5.19158	5.01485	4.73657	5.38102	5.12623	4.83053	4.23012	4.79984	5.5286	5.35052	5.51352	5.09255	4.99539	5.05503	4.32731	4.60731	4.98898	5.34537	4.36318	5.33651	4.31572	4.60964	5.13703	4.62503	4.94401	5.03362	4.95961	5.26612	3.8376	5.08437	4.99432	4.51025	5.00635	3.63711	4.09967	5.24721	4.92951	4.65212	4.38752	3.86286
DAD1	9.96759	9.70774	10.1141	10.2403	9.72294	10.4664	11.129	9.42159	11.2608	10.0883	9.80957	9.41981	10.3681	9.77998	10.0342	9.44857	10.3399	9.56011	9.79711	10.4917	9.76054	10.1046	9.87365	10.288	10.1433	9.5375	9.64914	9.21938	9.61736	10.1333	9.63745	9.87365	9.87365	10.4873	9.8489	10.0781	10.0309	10.0005	9.59549	9.95305	9.66085	9.76054	10.2138	10.0156	9.89759	9.81728	9.78984	9.81465	10.0748
DAG1	8.80301	8.54262	7.54053	8.1687	7.98867	7.67145	6.87528	7.32506	7.01342	7.58114	7.61108	7.77799	7.84646	7.99801	7.65444	8.16307	8.40152	7.51725	7.0993	6.65621	7.62895	8.05526	7.75102	7.74696	7.22917	8.21199	8.06794	8.13267	7.82542	7.682	8.1512	6.86709	7.71877	7.53838	8.36482	7.76568	8.05463	6.9348	7.68252	6.50123	7.21407	6.80711	7.41923	8.37719	7.06703	7.53676	8.32771	7.61051	8.30787
DCN	6.8883	7.35437	6.59836	7.27396	6.94006	7.79472	7.4486	8.18177	7.61327	7.86778	7.75433	7.96218	7.83632	6.41259	6.14488	7.56289	7.7363	8.25761	7.93349	7.97597	8.42465	7.71416	8.37143	7.11639	7.34861	6.85999	8.12992	7.00393	7.73341	7.80188	7.06878	8.66057	7.79472	8.32948	7.42028	8.16932	7.23382	7.57611	8.4074	8.92627	6.96018	7.97855	7.52448	7.64233	8.96761	8.21568	7.99575	8.20155	6.76961
DCTN1	7.85741	7.6908	7.85808	7.68032	7.18757	7.21097	7.60083	7.50375	7.39834	7.57611	7.58436	7.14895	7.59372	7.39534	6.43717	7.43338	7.43236	7.30221	7.52958	7.11522	7.18351	6.92546	7.82609	7.68806	7.56713	7.47915	7.35036	7.33844	7.48183	7.55803	6.38829	6.28652	7.41367	7.19564	7.62842	7.5218	7.58062	7.60511	7.38188	7.58587	7.30454	7.49656	7.18932	7.41367	7.49358	7.06305	7.03284	7.23563	8.12714
DCTN2	5.31918	5.43979	5.54727	5.7362	5.59878	5.60039	5.38521	5.36958	5.42554	5.29499	5.45838	5.36847	5.29785	5.81803	6.00125	5.50499	5.36186	5.27864	5.29887	5.32346	5.1276	5.32213	5.34716	5.38919	5.62169	5.56971	5.3706	5.49692	5.41369	5.40406	5.48646	5.31275	5.65519	5.34171	5.51858	5.42685	5.71447	5.71474	5.64817	5.28753	5.5796	5.5202	6.06258	5.67626	5.50991	5.2708	5.82092	5.54727	5.99004
DCTN3	8.5938	8.69054	8.59882	9.42319	8.66943	8.53213	9.6396	8.78967	8.69597	8.97188	8.47348	8.49062	8.80093	7.72279	8.56356	9.22301	8.57978	9.10276	9.16499	8.2359	8.49592	8.45253	9.06429	8.85539	8.18025	8.11478	8.97059	8.62257	8.64357	8.33111	8.6884	8.39066	8.91777	8.40826	8.46831	8.95041	9.43556	9.40336	9.00668	8.98781	8.71951	9.0979	9.3779	9.56689	9.09486	8.72512	9.31504	9.00383	9.21938
DCTN4	6.41451	6.38326	6.37575	7.4657	6.7445	6.32468	6.00987	6.58632	6.84651	6.67996	6.62599	6.49873	6.31933	6.60113	7.2415	6.33975	6.57135	7.0154	6.61959	6.84328	6.79652	6.74658	6.99997	6.74621	6.51736	6.63649	6.70245	6.78354	6.72271	6.4634	6.44541	7.05001	6.65927	6.87107	6.7776	7.27994	7.52791	7.05001	6.80971	6.73448	6.58795	6.60113	7.70247	7.10932	6.71334	6.82134	7.54337	6.86951	7.77695
DCTN5	5.90347	5.82428	6.21843	5.45609	6.27008	5.94562	5.91418	5.57245	6.20111	5.78784	5.90928	5.60337	5.86812	5.83167	6.35995	6.1368	5.91418	5.79731	6.00291	5.991	5.95808	6.14931	6.17725	6.00875	6.08795	5.62303	5.6914	5.60257	6.064	5.94348	5.50663	5.85851	6.05687	6.35225	6.2132	5.68927	5.67896	5.40611	5.67101	5.72995	6.01746	5.81303	5.34389	5.46212	5.96731	5.79699	5.25588	5.75936	5.62598
DCTN6	9.04151	8.3692	9.08069	9.17471	9.47719	9.44259	9.27744	9.00119	9.261	9.10109	9.04017	8.95829	9.47719	10.2546	9.05432	8.20597	8.61299	9.33589	9.20148	9.67397	8.71841	8.67427	8.86267	9.30411	8.44641	8.77828	8.81192	8.88574	9.12422	8.64049	9.81728	9.67179	9.63745	9.39238	9.57527	9.20649	9.25466	8.95829	9.33256	9.15003	8.89064	9.24624	8.95427	9.27744	8.98268	8.91907	8.75931	9.44078	9.3594
DDOST	9.73844	9.34643	9.46258	11.1014	10.0247	10.3504	9.55581	10.0558	9.75815	10.2138	9.97895	9.76761	9.79711	10.9259	11.2101	9.14844	9.43061	10.3026	9.91742	10.3432	10.0373	9.92327	10.1558	9.93806	10.3878	10.3026	9.99121	10.1112	10.1855	10.2699	9.86262	9.89205	10.1855	10.7861	10.1824	10.6244	11.0949	10.6095	10.0748	9.97895	9.98226	9.87365	10.8985	10.8825	10.2699	9.96485	10.8611	10.0498	10.9927
DERL1	7.34024	7.60567	7.62625	7.4563	8.08751	8.19598	7.94547	7.41646	8.06865	7.35666	7.52599	7.37154	7.82372	9.34643	7.1026	8.24483	7.56133	7.5337	7.47358	7.94604	7.69483	7.77973	7.46869	7.81088	7.59657	7.80724	7.68975	7.87815	7.66047	7.99453	7.78153	7.76215	7.53469	7.87465	7.95714	7.80967	7.60461	7.41037	7.90033	7.98667	7.48488	7.43288	7.44908	7.42165	7.56713	7.65661	7.7965	7.76739	7.68639
DERL2	7.75057	7.37284	7.87532	8.51585	8.21722	7.76739	7.10218	7.70787	7.55753	7.51072	7.8964	7.49871	7.5218	7.07198	8.24706	7.99324	7.07896	7.82909	7.49871	8.20669	7.74407	7.18841	7.52067	7.27444	7.36447	6.92331	7.4235	7.9017	7.61272	6.87372	7.99198	7.95049	7.38527	7.35812	7.39583	8.10436	8.08537	8.68637	7.81607	7.86905	7.98162	7.81486	8.76357	8.49233	7.75973	7.57709	8.35522	7.96618	9.27744
DERL3	5.12196	5.26121	5.2144	5.88119	6.16541	5.74145	5.45459	4.92562	5.09255	5.05937	5.35518	4.94977	5.33122	4.93412	5.17351	4.78742	5.13749	5.468	4.98789	5.89945	6.0832	5.8139	5.20879	5.43434	4.88681	6.58994	5.41253	6.38425	5.74717	5.2184	5.28727	5.24506	5.04227	5.97621	4.86954	6.259	5.74661	6.34035	6.49515	6.03376	6.10126	5.38727	7.15162	6.64869	5.93779	5.63779	7.08977	5.75696	7.02947
DHDDS	5.87485	5.85217	5.85244	6.05714	6.1228	6.07971	6.16105	6.12625	6.06487	6.61125	6.34718	6.09344	6.15234	6.44139	5.88009	5.88728	5.94934	5.99241	6.00236	6.20452	6.23609	6.09492	6.23205	6.2178	6.60148	6.29873	5.85217	5.98805	6.3376	5.92403	6.30143	6.19723	6.23952	6.61501	6.15027	6.20911	6.23078	5.75964	6.26648	6.18091	6.36813	6.4461	6.23169	6.24364	6.1646	5.98579	6.229	5.95861	6.45872
DNAJC3	7.03571	7.51384	6.93215	7.82967	7.43928	7.5444	7.07519	6.57276	7.3553	7.19659	7.12683	6.83851	7.52394	6.57033	7.09217	7.22148	6.88298	7.29721	7.02866	7.8418	6.88568	7.32055	7.26695	7.01342	6.87853	7.11348	7.02167	7.36447	6.87256	6.81045	7.16456	7.61696	6.81776	7.05411	6.75941	7.69296	7.65661	7.52067	7.53469	7.15333	7.23515	7.0311	7.52345	7.33386	7.126	7.00238	7.38	6.35995	8.10854
DOLK	6.95129	6.39663	6.95275	6.63265	6.92546	5.73565	6.69078	6.49837	6.25933	6.51131	6.24486	6.28932	6.4794	6.55223	6.11377	6.81991	5.59768	6.42822	6.44419	6.4217	6.19382	6.53808	6.57373	6.9473	6.20788	5.87367	6.6134	6.37635	6.23779	6.15652	7.0614	6.27182	6.29933	6.25537	6.16105	6.69531	6.66407	6.67215	6.46248	6.2903	6.75366	5.9662	6.93552	6.65202	6.39719	6.49159	7.29672	6.73802	6.95549
DOLPP1	6.73076	6.59337	7.04724	7.38823	7.0643	6.63058	7.32457	6.44286	6.59127	6.03259	6.7622	6.50123	6.59679	6.62199	6.98971	6.60515	6.53774	6.48787	5.96464	5.99241	6.1228	6.7508	6.19023	6.7015	6.61992	6.41319	6.55622	6.95856	6.6943	6.36898	6.98309	6.33184	7.57247	6.82894	7.32772	7.24337	7.0154	7.13342	6.41695	6.80065	7.62948	6.58729	6.56038	7.33037	6.32719	6.6134	7.1356	6.42822	7.65661
DPAGT1	7.66981	6.75044	7.72052	8.32128	7.72459	7.79287	8.13622	7.53422	7.64735	6.95549	7.64949	6.98614	7.56078	8.17736	7.54635	8.0821	7.292	7.31574	7.34389	7.77917	7.00749	7.48336	7.29254	7.55601	7.8733	7.22424	7.20878	6.70215	7.37377	7.48488	9.41436	7.5735	7.42259	7.02602	7.26079	7.2845	8.14252	7.83091	7.40176	7.08893	7.53999	6.86634	8.22033	8.0701	6.88868	7.47664	7.80902	7.25739	8.40579
DPM1	9.72828	9.73572	9.68929	9.99466	10.179	10.7861	9.97034	10.0442	10.4464	10.1364	9.55143	10.3219	9.96485	10.8143	10.3878	10.5723	10.0309	9.96162	9.75815	10.1558	9.64446	9.54747	9.73844	10.3291	10.8404	10.0102	9.62394	9.85754	9.66705	10.2268	9.84079	10.1464	10.3799	10.2172	10.0527	10.3575	10.0527	10.2438	9.83607	10.5301	9.96759	9.92622	10.2546	10.5386	9.74837	9.52221	10.2205	9.85499	10.2337
DPM2	6.9438	7.24513	7.01825	7.41081	7.24337	6.88049	7.62249	6.70005	7.12313	7.00953	6.82134	6.48366	6.84979	6.59163	6.92614	7.16584	6.41915	6.80207	6.7508	6.87818	6.96233	6.7914	7.29018	7.31243	6.83217	6.99289	7.05566	6.76111	7.27006	7.34861	8.01581	6.75977	7.39931	6.99011	7.42306	7.28891	7.59372	7.27768	6.5788	6.86673	6.89048	6.43501	7.89433	7.32772	6.67732	6.78034	7.70732	7.1026	7.96559
DPM3	7.93029	7.65381	8.14191	8.81316	8.57978	8.09833	9.28779	7.77405	7.01151	7.47762	7.38527	7.77405	7.60461	7.76163	7.48572	7.5776	6.74875	7.74055	7.55537	7.76283	7.57145	7.17293	6.92293	6.82342	7.03761	7.09722	7.49308	7.31919	7.75502	7.62895	8.34766	7.22062	7.50924	7.05036	7.62249	8.08276	8.62152	9.12562	7.78729	7.77405	7.92347	7.80724	8.84849	8.02512	8.00739	7.57659	7.54635	7.82372	8.70038
DPY19L1	4.72871	4.43527	5.54885	4.32625	4.87844	5.59407	5.09024	4.73821	5.14539	4.61159	5.02345	4.74766	5.1151	5.13077	4.46982	4.41044	5.1084	4.57424	4.63797	4.8331	4.50884	4.74245	5.17072	5.02502	4.68812	5.0681	4.59162	4.3211	4.82842	4.4963	4.89303	4.73111	4.71843	5.02717	4.8776	4.50225	4.06687	4.54427	4.56153	4.15007	4.08243	4.17878	4.51486	4.44473	4.35383	4.33389	4.69034	4.25562	3.95577
DPY19L2	4.16468	4.05483	6.35597	4.53694	4.30804	3.91622	4.53352	4.96744	4.80705	4.13024	4.13797	4.38473	4.12915	3.71717	4.59221	4.18361	3.85409	5.35026	5.21303	4.28425	4.71923	4.76093	4.97523	4.52496	4.62444	4.00218	4.57703	5.84766	4.85385	3.95032	4.48526	4.2223	4.39715	3.79901	4.56524	4.59134	4.92267	5.59013	4.67921	5.36161	4.02732	5.2133	5.39946	5.00558	5.57108	4.97095	5.20135	5.59145	5.11599
DPY19L3	7.20787	7.82731	7.36869	7.84905	7.69197	7.25393	7.26425	7.88047	7.18439	7.03027	7.37908	8.1546	7.4563	7.06547	8.77942	7.47408	7.27314	7.70195	7.47016	7.68639	7.45726	8.45414	8.08348	7.40982	7.1421	7.35347	7.32632	6.92364	7.48439	6.82494	6.72234	7.49709	7.35582	7.155	7.1796	7.4339	7.51432	7.78095	7.9211	8.49674	6.92688	7.70195	8.18109	7.96287	8.09238	7.9272	7.50867	7.75627	7.33302
DPY19L4	6.40767	6.90848	6.36655	6.64014	6.5161	7.43338	6.27804	6.60681	6.61435	6.27741	6.54982	6.41014	6.34283	6.35225	6.4378	6.91799	6.55652	6.62921	6.29487	6.51578	6.06859	6.4217	6.17698	6.48428	6.08082	6.34313	6.45872	6.5502	6.33725	6.56224	5.34642	6.66864	6.47226	6.30613	6.44228	6.21058	6.48459	5.98842	6.29	6.51485	5.75496	6.25478	6.26947	6.53808	6.16403	6.31933	6.63817	6.40675	6.0717
DYNC1H1	5.12486	5.31798	5.01857	4.88574	5.21789	5.16527	5.08924	5.01162	4.94838	4.93092	4.98333	4.99222	5.22109	5.13572	5.17928	5.28491	5.13077	5.08865	5.00479	5.22243	4.90101	5.07877	4.88362	5.18198	5.24642	5.02108	4.92896	4.92982	4.94081	5.02394	5.55581	5.16323	4.99485	5.16741	5.0474	4.89362	5.02802	5.07446	5.27405	5.10305	5.10762	5.25532	5.03746	5.06063	5.22662	5.00584	4.80541	4.81687	4.82764
DYNC1I1	4.19746	3.86475	4.29571	4.03405	4.09967	4.28725	4.31511	4.58436	4.19562	4.61436	4.94894	4.23673	4.08793	4.29311	4.3685	4.13024	4.32929	4.22121	4.20323	4.201	3.90216	4.0928	4.1819	4.17906	4.25784	4.29201	4.27316	4.37702	4.16089	4.00726	4.62417	4.50341	4.79703	4.07913	4.38418	4.39629	4.21181	4.15918	4.22365	4.26712	4.48498	4.47633	4.44748	4.53977	4.0805	4.04887	4.31272	4.38059	4.31919
DYNC1I2	6.98185	7.0154	6.25658	6.92905	6.42531	5.89672	6.8054	5.82458	7.3237	6.99087	7.06584	7.47152	5.83718	5.54462	7.35398	6.44004	6.95164	6.67534	7.10089	7.38476	6.65656	7.13227	6.51547	6.97566	6.45519	6.84247	6.46087	6.91984	6.40072	6.58536	6.6997	5.96133	6.8883	7.11432	6.78139	7.50473	7.01454	6.2495	5.79536	7.21544	7.02714	7.22102	6.75192	6.70826	6.78713	7.09558	6.41288	6.92978	6.7426
DYNC1LI1	7.2705	7.12775	7.40273	7.75502	7.69031	7.20407	7.18477	7.65661	7.78038	7.64396	7.44024	7.55319	7.64014	7.6964	7.92347	8.14252	7.43288	7.58114	7.64676	7.65499	7.40709	7.20584	7.19221	7.61272	7.49056	7.38925	7.68806	7.77917	7.58221	7.15541	7.88767	7.75627	7.35398	7.34112	7.5666	7.43034	7.6317	8.04539	7.82785	8.07361	7.87532	7.57904	8.05722	7.95181	7.52599	7.48227	7.81973	8.06051	7.71013
DYNC1LI2	7.79052	7.93091	7.7691	7.45583	7.69421	7.73033	7.91907	7.69748	8.00085	7.7757	7.7475	8.00282	7.71302	7.45776	7.40073	8.03525	7.70411	7.61162	7.74121	8.32948	7.65329	7.62572	7.60989	7.92225	7.61696	7.73402	7.67973	8.04273	7.4911	7.43579	6.67106	8.11205	7.58739	7.71877	7.97919	7.29254	7.47712	7.86838	7.61743	7.90433	7.51924	7.86838	7.78668	7.91138	7.57957	7.55803	7.7713	7.56607	7.61108
DYNLL1	11.0557	11.253	11.2401	10.7656	11.3939	11.5016	11.0557	11.3764	11.4798	11.8142	11.5222	11.4696	11.5112	11.5112	10.8935	11.0683	11.5984	11.0098	11.3764	11.2249	10.9621	11.5539	11.4234	11.9493	11.0949	11.2101	11.3034	10.9804	11.3301	11.5762	11.8281	11.3939	11.3671	12.0125	11.6695	11.2174	10.7755	10.5468	11.0098	11.357	10.6046	11.0626	10.675	10.6838	11.1081	11.1955	10.6838	11.1808	10.4464
DYNLL2	5.90318	6.06202	6.29459	5.95432	6.20514	6.10877	6.11069	5.99523	6.14123	6.12034	6.08256	6.066	6.11684	6.24337	5.67074	6.2043	6.20282	5.91785	5.95405	6.05299	5.93237	6.30931	5.82571	6.46371	6.06742	5.47435	6.11181	6.2103	6.21581	5.96248	6.09913	5.96104	6.4176	6.0521	6.24886	5.96049	6.05326	6.1872	6.08456	5.64566	6.64046	6.09093	6.19209	6.01293	5.83305	6.30237	6.18783	5.97621	6.26767
EDEM1	7.61429	8.03314	7.64233	8.25462	8.38818	8.2045	6.92614	7.88469	7.66814	7.81783	7.86967	7.91522	8.01509	7.47308	6.99444	7.99942	8.01119	8.27449	7.9017	8.51831	7.8267	7.59864	7.75627	7.34342	7.2763	8.30171	7.63903	7.47712	7.81314	8.12037	7.48668	8.02241	7.45821	7.90634	7.52128	8.1539	8.17801	8.0701	8.37068	8.45414	7.52646	7.9834	7.64066	8.19063	8.01854	7.5218	7.69591	7.88107	8.74502
EDEM2	6.57945	6.53944	6.90729	6.92758	6.9787	7.24594	6.81007	6.83851	6.67072	6.8975	7.00393	6.62818	6.98274	6.76603	7.30359	6.2142	6.86883	6.89538	6.88789	6.79259	6.84754	6.6901	7.08642	7.23515	7.38775	6.81545	6.94649	6.30208	6.86523	6.5546	7.43183	6.10235	6.17156	7.29903	6.73976	7.00913	7.34631	7.27813	7.12897	6.44643	6.71263	6.78529	6.71902	7.00038	6.49873	6.70005	7.19966	6.5247	7.16951
EDEM3	8.98781	8.26908	9.05576	7.97529	7.8213	8.0192	8.67518	7.29386	7.17914	7.63734	8.03525	8.29134	7.81486	7.94073	9.04017	7.88229	7.8882	7.76684	7.61847	8.69486	7.85685	8.32055	7.80664	8.00214	7.10764	9.01439	7.80428	8.14469	8.38984	7.39488	7.23733	8.02308	8.28635	8.41603	8.02113	8.1624	7.94992	8.08474	7.60885	7.74647	7.66865	7.51823	8.26015	8.03881	7.51569	7.64396	8.80301	7.58062	8.47002
EDN1	6.36303	6.77423	7.72109	5.98469	6.54319	6.49968	7.82731	6.48624	5.84741	6.20731	6.91501	7.02248	7.31484	5.01368	4.86725	7.51174	7.34431	6.8681	6.09176	6.50871	6.45742	6.00038	8.17074	7.45148	8.33264	6.58122	6.60851	6.78788	7.26565	6.4618	6.42822	5.88728	6.53584	8.83591	7.98667	6.42111	6.01045	6.95011	6.58122	6.52269	5.59305	6.18292	6.3376	6.27831	5.98355	6.26082	6.62854	6.50027	5.65271
ENGASE	7.54683	8.13896	8.14401	7.62516	7.65166	7.72279	7.4076	7.25989	7.29108	7.20878	7.12566	7.46523	7.59321	8.04938	6.78493	7.80902	7.60028	7.73805	7.56498	6.61899	7.33844	7.21977	7.4481	7.16755	7.27862	7.35582	7.19878	7.64676	7.54732	7.46523	7.11175	6.92758	8.18025	6.98577	7.46096	7.82423	7.86404	7.61213	7.74696	7.40221	7.38337	7.55065	8.04468	8.00668	7.36496	7.40026	8.39891	7.05566	8.31583
ENTPD5	5.41115	4.84514	4.93304	4.51081	4.88956	4.90831	5.48545	4.39763	5.13052	4.47887	4.5461	4.68059	4.68408	4.72647	4.89331	4.39763	5.2133	4.37037	4.2818	4.6738	4.23332	4.76422	4.52793	4.89468	4.79839	5.42606	4.57159	4.44015	4.78066	4.29379	4.52686	4.82038	5.5508	5.11114	5.17044	4.79622	4.42492	4.3872	4.32141	4.23531	6.69148	4.50779	4.42026	4.4082	4.44886	4.34593	4.63428	4.05694	4.72731
EOGT	7.37819	7.87585	7.2954	6.4516	7.82542	7.02714	6.68285	7.01938	7.69421	7.14729	6.95591	7.69483	7.65882	6.34066	6.97566	7.41128	6.87145	7.67145	7.40473	7.58636	6.60148	7.19135	7.51338	7.07161	7.01271	6.32184	7.03571	7.74534	7.08642	6.44643	7.53577	7.24772	6.03317	7.54242	6.45742	6.90658	6.7408	7.19221	7.55803	8.45812	6.51452	7.7691	6.33725	6.90354	7.06664	6.8975	6.7445	7.24863	6.33125
EPHA5	2.96366	2.91716	2.95156	3.21136	2.94708	2.92453	2.94421	2.97777	2.92959	2.9396	2.96893	3.03785	2.98376	2.91627	2.95396	2.93065	3.01065	2.94085	2.93444	2.98291	2.94968	2.95958	2.9567	2.94109	2.99085	2.93277	2.94645	3.22323	2.926	2.93899	2.99636	2.93899	2.93001	2.98607	3.06239	2.9811	3.33241	3.00607	2.95139	2.98234	2.99733	2.91308	2.95139	2.90173	2.93466	2.91224	2.99733	3.02277	2.9567
ERP29	10.314	9.70281	8.97327	10.7343	9.84079	9.41262	9.56885	9.92032	9.80957	9.95305	9.42159	9.43232	9.19173	9.41098	10.7755	10.0623	9.76295	10.0127	9.84079	9.37029	9.82268	9.4587	9.76558	9.18076	9.62874	9.92032	9.81205	9.87897	9.69214	9.99121	10.7135	9.7129	9.48303	8.98533	9.16997	9.79962	10.5813	10.7508	9.98527	9.77497	9.64664	10.0309	10.7755	10.3962	9.87897	9.79711	10.2583	9.92899	10.5468
EXT1	6.15149	6.85156	6.64967	6.36358	6.83557	6.17251	6.32752	5.8951	5.99004	6.3995	6.29487	5.82171	6.2903	5.31543	6.97798	7.25859	5.76826	6.20883	6.15349	6.19958	5.65994	5.83801	6.21902	6.60819	6.06458	5.83167	6.1265	5.68707	5.90088	6.05973	6.43047	6.43323	5.54885	6.4684	6.2167	5.69497	6.24856	6.98653	6.25384	5.9872	7.15031	6.06458	6.29584	6.36898	5.8706	5.5391	6.56007	5.67181	6.26139
EXT2	6.21233	6.2126	6.05742	6.55906	6.38055	6.20668	5.70604	6.56508	6.54893	6.30584	6.02614	6.16803	6.19614	6.64471	5.81472	6.32373	6.28131	6.2572	6.0755	6.18153	6.00525	6.08425	6.37635	6.12566	6.02423	5.72995	6.03935	5.31119	6.09943	5.99578	6.39332	6.40005	5.81169	6.15349	6.57096	6.10002	6.34313	6.55677	6.24829	6.34183	6.18153	6.11742	6.18626	6.43971	6.26139	6.11346	6.01346	6.14994	6.34035
F12	5.23505	4.67971	6.12766	4.34458	4.85229	5.31174	5.88919	5.05429	5.25446	5.08865	4.26541	4.49205	4.701	4.94025	5.04924	4.70884	4.83081	3.90002	4.56375	4.11628	4.1877	4.7349	4.671	4.91471	5.89648	4.65784	4.4738	4.04494	4.87652	5.0259	5.70208	4.28008	5.30881	4.58298	5.13272	4.27483	4.6469	4.17341	4.47407	4.30912	5.02321	4.55175	4.29738	4.4732	4.31977	3.69917	4.15395	4.27404	4.30026
F5	8.30563	5.12511	8.94919	6.11438	6.59305	7.06835	7.91775	5.07099	5.99293	6.696	4.08819	8.92627	6.2495	4.42967	7.39336	6.20821	7.87878	5.6854	6.00614	4.89552	6.34651	6.95549	7.53886	5.39268	9.00383	6.78788	5.98973	6.35028	5.91221	5.31436	5.9592	8.11881	7.42602	3.64341	6.31898	6.94693	6.91644	4.35499	5.26183	4.16389	3.51615	5.9745	4.05509	4.17287	4.46015	5.44978	5.0715	4.01818	2.72101
F8	5.36543	6.12309	6.04319	7.34814	6.19354	5.78977	6.678	6.31115	6.57772	6.81776	6.32153	5.95579	6.5398	6.59546	6.14211	5.97679	5.76709	8.2785	6.69928	6.64631	6.34283	5.93694	6.91469	6.47066	6.25042	5.37008	6.83045	6.23497	6.08854	6.51937	4.40082	6.70046	5.9048	6.17338	5.33498	9.66284	7.28585	7.59276	7.038	7.63797	6.72302	7.46473	9.34643	8.80514	6.59512	6.72126	9.48491	7.37237	11.6474
FCSK	7.85918	7.04596	7.46824	7.39386	6.70183	6.4176	6.96898	6.94006	6.35814	6.63339	6.73379	7.24003	6.32908	6.86151	6.64014	6.66791	6.91273	6.62235	6.7914	5.52576	6.26296	6.2523	6.18814	6.52181	7.1356	6.31834	6.64046	5.98744	6.51324	6.12851	5.79947	5.89481	7.23515	5.81444	6.68831	6.38605	7.38925	6.56508	6.57135	6.29807	7.33797	6.53356	7.1356	6.75867	6.27551	6.34681	6.48397	6.17817	6.56702
FKRP	4.53864	4.72759	4.71395	4.67208	4.71422	4.61214	3.78332	4.62611	4.58214	4.74738	5.18145	4.60704	4.66033	5.35235	5.03634	4.64437	4.1906	4.62363	4.79783	4.7701	5.37427	4.60362	4.8361	5.03413	4.88574	4.63231	5.09715	4.69119	4.99111	5.12968	4.8582	4.43297	4.7812	4.94262	5.23298	5.3373	4.71205	4.40112	4.5925	4.4695	4.84402	4.66202	5.39348	3.7245	5.36519	4.7055	4.59961	4.73518	5.01566
FKTN	6.53915	6.0248	6.39784	6.78178	6.52044	6.20759	7.31343	6.31017	6.36688	6.22356	5.97368	6.51259	6.13282	6.09004	7.01342	6.43474	5.7359	6.62696	6.00845	6.72869	6.03317	5.56043	6.32874	6.44196	5.61644	5.90428	6.16105	6.34005	6.23525	6.01045	5.7765	6.42854	6.65273	5.89345	6.16488	7.01495	6.79841	6.03034	6.32628	6.67898	6.31081	6.41044	6.68488	7.09217	6.28165	6.00959	6.77423	6.55363	6.43137
FMOD	9.34643	8.3618	7.84287	8.72285	8.36755	9.75815	8.51129	9.69753	8.38734	8.89555	8.68427	8.91295	9.26454	9.40911	5.93576	9.09338	8.83591	8.72512	8.90667	9.04458	9.14236	8.66057	9.50075	9.33256	8.29438	7.66541	8.98533	7.24096	9.00007	8.48346	7.6786	9.61513	7.70029	8.91163	7.69421	8.89901	8.19598	8.83591	9.46677	9.51	7.89779	8.38397	8.50859	8.70038	10.5386	9.12562	8.88321	9.25284	7.55267
FOLR1	8.84256	10.4917	9.3779	10.1112	7.11639	7.70567	7.00193	6.86523	8.09631	8.57871	10.3331	7.11723	6.70826	6.6098	7.25649	8.10655	8.11817	8.56838	8.26908	9.53543	9.44259	6.60613	8.81801	6.80642	8.54877	7.86584	8.32308	9.08791	7.35715	7.81026	7.26657	9.09198	8.38984	8.904	8.94786	8.88448	10.0277	9.93519	8.70143	7.67973	6.82792	8.95829	9.06843	9.15146	7.88586	8.07653	8.76896	7.58543	8.76786
FPGT	4.35295	4.49349	4.69362	4.91307	4.91229	4.62474	4.72255	4.27593	4.49041	4.59632	4.42709	4.46758	4.55509	4.91332	4.68754	4.32731	4.71238	4.61758	4.4497	4.53603	4.61582	4.24959	4.43527	4.68113	4.79491	4.58986	4.46096	4.84978	4.42854	4.15811	4.42824	4.61812	4.65566	4.81403	4.5219	4.75099	4.82065	4.70303	4.49013	4.53464	4.61668	4.31869	4.7228	4.73933	4.44277	4.2818	4.75421	4.27068	4.80622
FTCD	4.53294	4.4887	4.40792	4.8381	4.39738	4.57506	4.55097	4.8506	4.36427	4.36711	4.47661	4.52554	4.37646	5.14727	4.50256	4.47297	4.46786	4.47824	4.47915	4.38086	4.47995	4.55201	4.50194	4.50284	4.45222	4.49524	4.5627	4.50966	4.52309	4.52165	4.50966	4.39629	4.47272	4.59393	4.45823	4.98581	4.45687	4.69389	4.5664	4.56724	5.00048	4.67267	5.164	4.48722	4.50284	4.5675	4.96397	4.61241	5.23848
FUCA1	6.04975	6.40284	5.98607	6.34651	6.18541	5.77181	6.1675	6.13648	6.31676	6.83634	6.17454	6.17975	6.49515	5.94736	5.87567	5.63779	6.30521	6.49935	6.29873	6.56038	6.45318	6.52993	6.20254	6.23296	6.33793	6.52181	6.59127	6.27581	6.16951	5.96049	5.68879	6.73208	6.52959	6.46149	6.28044	6.21695	6.44228	6.08425	6.35566	6.22842	6.69531	6.26382	5.85851	6.01068	6.59836	6.47667	6.11891	6.02614	5.52318
FUOM	5.15704	6.35566	5.57411	5.22476	5.69439	5.65941	5.98744	5.37899	5.30617	5.69735	6.13976	5.72462	6.17222	5.89401	5.36	5.40406	5.85055	5.98948	6.05268	5.75992	5.21364	5.62676	6.31834	5.28173	5.89701	5.38228	5.76855	4.93768	6.27707	5.80563	4.56693	5.35181	5.93749	5.1591	5.41763	4.82576	5.38026	5.32864	5.77513	5.28676	7.34631	6.4384	5.0852	5.05856	6.09122	5.58521	5.18631	5.26149	5.39973
FUT3	7.06547	6.25325	7.15739	4.24596	6.82134	6.96549	8.04394	5.34971	5.20247	6.11595	5.82092	6.43449	5.87703	3.49239	3.34807	6.50217	6.61959	4.69389	5.8391	6.19784	5.76965	7.23178	5.40491	7.41037	6.44643	7.86967	5.64873	5.71474	6.7547	5.96077	7.38188	5.20271	5.91088	7.12313	6.70897	4.98227	4.80926	4.29201	4.55014	3.35096	6.77106	3.91307	3.61948	3.83598	3.34957	5.22891	4.23277	4.34564	3.94629
FUT4	7.03069	6.03906	7.38047	6.23359	7.50924	7.75323	7.98032	5.88942	7.01863	6.5319	6.81657	6.84686	7.01233	7.5735	5.85079	8.12992	6.54145	6.14248	6.00407	6.48987	5.92403	6.4948	7.40367	6.97331	6.0894	7.79416	5.58604	6.03808	6.7015	5.84848	8.00016	6.40436	6.74414	7.0785	7.04596	6.54045	6.29276	6.78858	6.51736	5.92161	7.3585	6.07228	6.14635	6.5247	5.67074	6.04653	6.02987	6.27956	6.229
FUT5	5.05883	4.54695	4.84924	5.1563	5.04093	5.09689	5.10192	4.54224	4.72894	4.9588	4.73138	4.91856	4.63766	4.88765	5.07986	4.80069	5.07475	4.94448	4.8635	4.42324	4.96148	5.04093	5.06063	5.02824	5.27919	5.27561	4.7877	5.98607	4.90152	5.14805	5.1553	4.7801	5.10273	5.15478	5.17514	5.22831	5.18791	6.11181	5.06037	5.28961	5.29473	4.7502	5.97566	5.92161	4.93713	5.04981	5.58094	4.87007	7.05737
FUT6	6.1701	5.22553	5.98099	4.85985	5.7677	5.85962	6.75044	4.96931	4.75871	5.08949	4.97095	5.94823	5.13827	3.96197	3.80447	5.69709	5.55105	4.75622	5.04227	5.47358	5.2865	6.52209	5.03773	6.3995	5.97965	6.90393	5.08835	5.78134	5.89616	5.05159	6.41889	4.97715	5.77022	6.02641	5.69168	5.19129	5.06342	4.61436	4.48722	3.92308	6.24763	3.97231	4.29201	4.45366	3.73093	5.11271	4.77702	4.46925	4.78548
FUT7	4.4847	4.2807	4.45656	4.61812	4.25994	4.34681	4.37921	4.09003	4.09003	4.19167	4.22338	4.10738	4.29347	4.35524	4.3443	4.15293	4.15143	4.23975	4.05509	4.30083	4.48526	4.87471	4.16633	4.26984	4.42882	4.68725	4.30522	4.505	4.25044	4.24929	4.36206	4.21702	4.58841	4.18272	4.26318	4.32731	4.46758	4.97657	4.46067	4.19142	4.3992	4.20679	5.1103	4.62061	4.40234	4.26023	4.67574	4.23012	4.85358
FUT8	7.10296	6.15407	6.81886	5.90928	6.78071	6.69928	6.68831	6.19148	6.31273	6.75192	6.42597	6.66592	7.40176	5.87458	7.38627	6.35502	7.22286	6.60216	6.30237	6.66552	6.2167	7.16627	6.33822	7.49205	5.48807	7.91407	6.0521	6.07489	7.05001	6.36688	5.14193	6.76355	6.39978	6.9639	7.16539	6.42531	6.01346	5.07475	6.5674	6.34842	6.91233	5.85521	6.62599	5.53988	6.44228	6.7632	6.13704	5.95099	6.094
FUT9	4.68784	2.75539	3.00717	3.43556	3.35181	2.72967	4.04379	2.72464	2.7143	3.25728	2.73979	3.71488	3.14317	4.06179	2.76043	3.23896	2.72554	3.40439	2.75069	3.61064	2.78429	2.75404	2.7315	3.51111	2.74233	3.62241	2.89236	2.81818	2.72702	2.74764	2.74818	3.81662	2.80805	2.73701	2.72702	2.74599	3.14397	3.99161	2.76409	2.75178	2.74599	2.83868	4.2231	4.05028	2.73027	2.77311	2.81616	2.93277	5.25671
GABARAP	11.4596	11.0949	11.5434	11.3855	11.3034	11.1218	10.4464	11.6937	10.7343	11.403	11.7972	10.9259	11.6937	10.1824	10.4543	11.1218	11.3301	11.49	11.6818	11.2101	11.612	11.253	11.5653	11.3764	11.3118	11.2862	11.6579	11.5762	11.3477	11.2249	11.7689	11.016	11.253	11.3855	11.49	11.403	11.635	11.0421	11.6695	11.403	10.8773	11.8422	11.2696	11.129	11.7972	11.6579	11.6219	11.5653	11.49
GAL3ST1	6.10701	5.71474	6.31615	5.10103	5.57877	4.94234	7.02367	5.1563	6.05601	5.13406	6.37957	4.97231	4.35499	4.86954	5.78107	4.17959	6.21581	4.4732	5.28547	4.83053	5.13749	5.33578	5.28058	5.89157	6.1964	4.97095	4.92649	5.75964	4.60989	6.44075	6.51801	5.43207	6.33094	5.97077	5.77455	4.64746	5.14967	5.28147	5.05238	4.61926	6.85767	4.99269	5.06216	5.39529	3.97015	4.58629	4.86807	5.75826	5.55686
GALE	6.695	6.26296	6.67397	5.68185	6.9283	6.6395	7.30409	5.54727	6.22868	6.99805	6.72903	7.10644	6.13364	6.80711	6.15623	5.7928	6.53584	5.68002	6.24829	7.21368	5.81087	6.31394	6.47286	6.90993	7.07078	8.05583	6.39814	6.95549	6.74374	6.56774	6.4384	6.7914	7.10764	6.78674	7.13641	6.42301	5.65194	5.34362	5.93123	5.75252	6.71171	5.84905	5.32652	5.42139	5.49489	5.54591	5.34147	5.34738	5.61321
GALK1	4.11261	3.40567	3.90922	4.00112	4.27015	4.12997	4.28813	3.94145	3.98698	4.13958	3.97041	4.00958	3.99348	4.39715	4.52686	3.97895	4.00726	3.57051	4.17178	3.54064	3.994	4.16982	4.08793	4.06554	4.11261	3.58979	4.00958	3.57169	4.13139	4.02354	4.44532	3.9864	4.01525	4.01308	4.13404	4.74077	3.65928	3.82317	4.06742	4.06554	4.65647	4.01846	4.00726	4.10435	4.26049	4.08403	4.11344	4.01339	4.18742
GALNT1	8.2793	9.26941	9.17303	8.64137	8.6485	8.75379	9.23468	8.40579	9.59082	8.93616	8.58502	8.22168	9.14051	9.37391	8.46182	9.37553	8.62052	8.89064	8.76025	8.80716	8.35427	8.61299	9.3779	8.45578	7.83821	8.37719	8.92502	8.56664	8.77356	8.56838	8.3609	8.77592	8.10232	8.83359	7.97464	8.8107	8.66057	8.62943	9.08366	8.89901	9.07284	8.93096	8.16802	8.37963	8.6112	8.66377	8.5838	8.58983	8.37719
GALNT10	7.91407	6.68172	7.00832	5.54247	6.94498	6.67831	6.16983	7.07519	7.02009	7.03842	7.14557	7.32188	6.5767	7.47358	5.054	7.09765	7.49452	6.65036	6.60851	6.72582	6.7947	7.63455	6.89787	7.85092	6.45807	6.7158	6.65068	5.87226	6.54555	7.19391	6.2178	7.13514	6.55124	7.44024	6.90202	6.73107	5.62389	5.39707	6.69531	6.94045	6.1761	6.51801	5.20982	5.53835	7.06918	6.96233	5.7726	6.27831	5.09282
GALNT11	8.76786	8.6465	8.98908	9.261	8.34533	8.42911	8.59975	8.77828	8.14544	8.37395	8.38568	8.74261	8.50609	8.02786	7.88283	8.72737	8.54262	8.75379	8.87944	8.07861	9.14051	8.72737	8.64357	8.63036	8.25534	7.77859	8.82034	9.1182	8.74376	8.30563	8.33111	8.44641	8.70038	8.85428	8.5778	9.22301	8.56161	9.75559	9.01072	8.56556	7.68478	8.9387	10.3103	9.69999	9.13024	8.86138	10.007	8.92245	10.2955
GALNT12	8.92502	9.00668	7.99256	7.44307	8.50047	6.30676	9.46056	7.53838	6.91427	7.60461	7.89971	8.2532	7.00468	6.07998	5.05159	8.83911	7.83574	6.66759	6.99405	7.74237	7.5538	7.9247	8.18025	8.86385	7.16197	7.96037	7.84055	7.69748	8.08008	8.12304	8.09029	7.43974	8.09771	7.13266	8.51216	8.07495	7.9247	6.44834	6.63058	5.98686	8.29913	5.73133	7.18257	7.06664	5.93576	6.66336	6.79918	6.00322	7.20534
GALNT13	3.38533	3.25851	3.026	3.14252	3.35037	3.30728	4.0658	3.44317	3.20912	3.15028	3.46013	3.3295	3.9508	3.21158	4.34125	3.21295	3.25893	3.25584	3.4137	3.26961	3.47441	3.06944	3.93054	3.26393	3.28021	3.39532	3.55749	3.29529	3.23027	3.46414	3.16291	3.46705	3.22927	3.27783	3.23152	3.49358	3.04253	2.95773	3.32493	4.27892	3.21855	3.31334	2.9081	3.02811	4.8073	3.21795	3.75087	3.16719	3.08455
GALNT14	5.43895	5.38785	7.89373	4.71646	5.81865	5.78948	7.48018	7.24471	5.35792	5.95156	5.68322	4.81625	4.1399	9.78732	4.32706	6.23048	4.84817	5.44109	5.6065	6.07694	4.55393	7.23043	6.00759	6.02729	4.45536	6.91074	6.77535	6.77423	4.90396	7.77458	4.91689	5.69	5.38869	6.65348	5.79873	5.52629	5.08752	5.56177	5.52653	5.13435	5.26451	5.63399	5.73672	5.48022	5.286	6.0982	6.10557	5.67233	5.17295
GALNT15	4.42547	4.85253	4.45024	3.74461	4.60158	5.42033	4.4887	4.09775	4.75347	4.3814	5.06314	4.45366	6.4378	3.97786	3.97895	4.18246	4.47824	4.76955	4.12601	4.31025	4.21559	4.26183	6.73903	5.13052	4.57365	4.20024	4.22672	4.00801	3.87721	5.71998	4.32651	4.45305	4.09719	5.55418	3.98351	4.56073	4.00057	4.09915	4.16468	5.66466	4.63258	5.73864	4.87279	3.99558	4.48294	5.40326	4.60515	4.52578	4.19456
GALNT16	4.23012	4.52846	4.51242	5.17295	4.14844	4.39548	4.60674	4.89468	4.70041	4.4732	4.39688	4.76703	4.41881	4.4172	4.52986	4.82764	4.45191	4.92812	4.86807	4.75814	5.42424	4.75159	4.47661	4.38362	4.52416	4.34624	5.15206	4.60762	4.60158	4.7502	4.38086	4.95581	4.81987	4.3872	4.43163	4.83662	5.40326	6.18003	5.2836	5.90954	4.34537	5.5539	5.37562	5.33909	5.85409	5.48545	5.00785	6.10466	5.93123
GALNT17	4.25701	4.40648	4.49775	5.25205	4.49205	4.36178	4.49715	4.38833	4.38224	4.23503	4.43783	4.40147	4.50779	4.58489	4.60989	4.33687	4.411	4.49238	4.50112	4.21399	4.42056	4.73987	4.17469	4.46562	4.66846	4.43987	4.71646	4.69362	4.51767	4.24383	4.59451	4.40341	4.38059	4.49291	4.52846	4.7894	4.47995	4.61868	4.77306	4.49379	4.28813	4.27701	4.86265	5.06112	4.37401	4.43163	4.74851	4.48784	6.22959
GALNT18	4.671	4.66593	5.31946	4.98923	4.68664	4.97523	4.45078	4.71449	4.58298	4.7701	4.91471	4.76422	4.41347	5.27807	4.89441	4.55125	5.09748	4.68086	4.68976	4.40455	4.76649	5.01368	4.80381	4.86378	5.35361	4.82097	4.58898	4.94426	4.53324	4.84428	6.23809	4.15263	4.52713	5.23273	4.17065	4.77278	5.00071	4.9632	5.10609	4.81923	4.44554	4.60129	5.17841	4.60246	4.87248	5.02023	4.72786	5.03068	4.29409
GALNT2	7.15906	7.01495	7.33797	8.32622	6.64149	7.53216	7.98867	6.9893	7.11601	7.04272	7.55864	7.14773	7.24096	7.24724	8.20978	6.76924	7.34582	7.60672	7.33615	6.51423	7.23733	7.37421	7.1961	6.90238	6.68831	7.48711	7.01863	7.40709	7.42647	7.32007	7.26608	6.4634	6.97331	7.28309	6.63884	8.11881	8.24567	7.73568	7.30546	7.17778	6.38425	6.73379	7.68478	8.10946	7.71416	7.28891	8.11881	7.37676	8.55246
GALNT3	7.41923	7.51019	7.11476	6.91723	7.20103	7.33844	7.60624	6.25136	6.66373	6.49873	6.92139	7.13514	7.14001	6.12821	7.12313	6.93785	6.65313	6.229	6.22685	6.7426	6.46716	6.82167	6.52405	7.20787	6.51229	8.21414	6.11921	7.37109	6.86445	6.8845	7.19221	6.98461	7.17492	6.78748	7.02083	7.048	6.93826	6.86445	6.27214	5.16323	6.56839	6.1857	6.60749	6.84544	5.43569	6.22096	6.67898	5.90954	6.71832
GALNT4	8.21871	7.66653	7.14037	7.03069	9.85754	7.20828	7.27726	5.5417	8.0578	7.41743	6.64377	7.86101	6.46149	6.155	6.48917	5.9307	7.95776	6.3008	6.06911	7.29809	6.67106	6.68549	7.91973	7.47308	8.03246	8.19063	6.47448	7.21006	7.52732	6.229	6.43621	7.98937	9.17932	6.95742	7.98603	7.37421	7.02907	6.58696	6.01519	5.04337	7.77297	6.06804	5.71051	6.56537	5.2144	6.55812	6.12955	6.25042	5.91757
GALNT5	5.62541	6.05484	6.11775	3.43929	4.91744	4.71449	5.516	4.33417	5.8198	5.16883	4.20352	6.98185	6.75501	5.53835	2.98376	7.6964	6.31994	4.35205	4.24596	4.70855	4.01973	4.98898	4.54486	6.60947	4.58598	6.65894	4.701	4.56582	5.11318	4.63371	5.51325	5.42223	5.2184	5.75881	5.40108	4.67348	3.62352	3.42795	3.22987	3.40759	3.96453	3.06666	3.23152	3.91176	3.49051	3.78911	3.71541	3.25992	3.56933
GALNT6	8.83591	6.08027	7.05304	5.35131	7.66152	6.32437	7.18887	6.1079	5.39607	6.26681	6.8681	7.23905	6.54525	4.75954	5.28753	6.7469	7.05111	4.55628	5.26856	7.83821	5.51753	5.9716	6.00264	7.14001	4.77619	7.52958	5.80811	5.16125	7.03532	6.25293	5.77995	7.33083	7.27575	5.72628	7.25859	6.48366	5.14889	4.60216	4.82097	4.34458	7.12983	5.05827	4.83053	4.07249	4.84453	4.87628	4.62002	4.84621	5.59305
GALNT7	9.29303	9.25942	8.91907	8.422	9.93806	8.83359	9.76295	8.16654	9.38874	9.01846	8.63852	9.79235	9.48491	8.56453	8.78653	7.69031	9.10871	8.24181	7.87532	9.02696	7.84337	8.7997	7.91775	8.43599	8.56664	9.90882	8.05722	8.71841	8.60814	7.66981	7.00913	9.24164	9.29487	8.66648	9.17624	9.07284	8.44992	8.57124	8.12385	7.38381	8.76255	7.35901	8.88074	8.56065	7.10045	7.93809	8.65335	7.40273	8.84622
GALNT8	4.02657	4.14568	3.90552	3.90138	3.95951	3.96142	4.31433	4.12751	3.85643	4.0936	3.89144	4.25864	3.78964	3.82287	3.8831	3.82428	4.16415	3.96142	4.12413	4.30711	4.23217	4.02893	3.94499	4.09692	4.02465	4.18918	4.07939	3.92599	4.40147	3.99319	4.1399	4.02732	3.78938	3.85668	3.94684	4.03801	3.92335	4.58326	4.07192	4.09333	4.82436	4.12496	3.93481	3.95979	4.40932	4.19113	4.06907	4.12671	4.25103
GALNT9	5.08496	4.62526	4.76397	4.54695	4.65701	4.63317	5.00965	4.55986	4.80294	4.53379	4.5782	4.564	5.06752	4.62784	4.33007	4.53522	4.71262	4.51825	4.46982	4.41572	4.58489	4.60762	4.59047	4.5954	4.61868	4.50366	4.45305	4.35555	4.79159	4.57002	4.65516	4.84708	4.57758	4.60013	4.54982	4.56781	4.71316	4.68836	4.72917	4.68976	4.72232	4.57365	4.71812	4.69813	4.70443	4.71177	4.47012	4.94134	4.70749
GALNTL5	2.63169	2.66573	2.58511	2.67569	2.60444	2.59768	2.56548	2.63844	2.51369	2.63124	2.5731	2.60985	2.61786	2.6283	2.59388	2.6488	2.58277	2.5361	2.60742	2.50931	2.50807	2.63028	2.55157	2.63169	2.56676	2.73323	2.57734	2.71112	2.55773	2.64994	2.56125	2.51494	2.59556	2.562	2.66499	2.67139	2.60985	2.75321	2.61541	2.64605	2.61589	2.59125	3.48354	2.62032	2.63377	2.59611	2.8636	2.58731	2.90471
GALNTL6	3.25328	3.23361	3.24773	3.23629	3.25141	3.48628	3.24811	3.24751	3.19243	3.17891	3.24378	3.25369	3.24632	3.23219	3.25625	3.20568	3.25141	3.26204	3.20026	3.24101	3.24481	3.31903	3.26961	3.24549	3.26052	3.41001	3.24793	3.46873	3.26181	3.26293	3.27326	3.22845	3.23551	3.27216	3.22027	3.24938	3.30296	3.41284	3.28062	3.25666	3.27111	3.29762	3.27563	3.33161	3.1962	3.25565	3.37329	3.2925	3.6474
GALT	5.39136	5.06085	5.15073	5.80181	5.03149	4.77843	5.54221	4.85201	4.921	5.03908	4.72944	5.14067	4.77169	4.60246	5.58014	5.01511	5.0162	5.38521	5.43041	4.63036	5.81749	5.10762	5.03413	5.08924	4.88099	4.89604	5.29011	5.2981	5.15808	5.22688	5.25231	4.76843	5.61046	4.9612	5.36364	5.54326	5.6666	5.22084	5.12173	5.14193	6.1115	4.93943	5.08202	5.35518	5.62725	5.33551	5.51277	5.32785	5.94482
GANAB	9.13318	9.36433	9.41098	9.51206	9.38698	9.49469	9.22941	9.32381	8.91163	9.07284	9.5375	9.03714	9.1438	9.90292	9.19496	9.09627	9.15003	9.25466	9.22464	8.78537	9.76761	9.67637	9.54551	9.70281	9.46258	9.76295	9.38348	9.74087	9.41981	9.74837	9.99121	8.62052	9.5974	9.52221	9.83833	9.71023	9.50631	8.92749	9.43915	8.72841	9.08932	9.04017	9.20649	9.02988	9.5708	9.56452	9.59082	9.41098	9.8765
GBA2	6.50531	6.5136	6.50059	6.30453	7.02826	6.18482	6.94157	6.24636	6.46716	6.17454	6.31209	6.63162	6.15349	6.03609	6.7469	6.64931	6.07666	6.46871	6.55124	5.92742	6.53944	6.66162	6.87975	6.78314	6.44483	6.55875	6.64765	6.21356	6.63576	6.24979	7.02404	5.62467	7.3757	6.08655	6.67397	6.40131	6.53882	6.39543	6.55363	6.08172	8.20302	6.46716	6.83672	6.48752	6.43745	6.77286	6.54452	6.34313	6.11775
GBF1	6.23169	6.38794	6.5319	6.62298	5.94293	6.22124	6.18402	6.73275	5.88264	6.27524	6.26496	6.55087	6.25811	6.36564	6.15893	6.06658	6.56774	6.57547	6.33626	5.10977	7.07078	7.40568	6.58663	6.40495	6.9438	6.8151	6.74907	7.01898	6.65453	7.07559	7.44553	5.64896	6.26919	6.31394	6.20138	6.31273	6.13648	6.22747	6.42334	5.87338	6.38457	5.76534	6.67397	6.91984	6.50493	7.16154	7.52345	7.02009	7.10558
GCC1	4.67015	4.66286	4.80381	4.92785	4.69696	4.68836	4.62202	4.53493	4.39844	4.49775	4.41236	4.52873	4.69813	4.69904	4.62669	4.70969	4.47237	4.36288	4.47605	4.45161	4.4771	4.56724	4.56893	4.79984	4.59986	4.71584	4.58629	4.59905	4.65918	4.53782	4.72422	4.53324	4.75296	4.86465	4.68408	4.65489	4.71475	4.53724	4.69254	4.60303	4.62444	4.44473	4.73904	4.8582	4.52661	4.68086	4.85172	4.67438	5.31603
GCNT1	7.1303	4.19029	4.48434	4.47995	5.5386	5.41173	7.97733	5.49076	4.78353	5.33966	5.37683	5.53561	5.18298	4.60792	6.29552	5.27482	5.2414	4.96553	4.55843	5.58793	4.66962	5.38492	4.86639	5.71603	4.08618	5.9012	4.55125	4.61696	4.98581	4.45536	4.1586	5.8984	5.8728	5.04981	6.06258	5.57933	4.43409	3.71197	4.28957	5.46186	6.60355	5.16498	4.15344	5.01994	5.40565	4.7319	3.67353	4.55042	4.30463
GCNT3	10.7187	10.6883	10.483	7.1303	9.54551	9.64914	11.6818	7.71189	9.83362	8.88074	7.73341	10.4787	7.63734	6.17757	6.31115	9.55581	9.18076	8.3127	8.28397	10.7135	9.53345	10.0005	9.55819	9.76761	10.1927	9.98527	9.90292	8.87608	9.62638	9.64664	8.13192	7.95264	10.1894	9.22123	10.3919	7.55803	7.99741	6.35382	7.49205	3.47758	9.43232	7.75269	5.68654	7.40612	6.02614	7.93621	5.28173	5.15478	2.44355
GCNT4	2.89533	2.91884	2.88254	2.7962	2.86571	2.85294	2.85338	2.87926	2.91495	2.89533	2.87313	2.77039	2.86595	2.87083	2.84081	2.84592	2.84496	2.85475	3.05815	2.77388	2.84263	2.90114	2.88477	2.83449	2.90362	2.87497	2.85224	3.04985	2.87034	3.08371	2.85201	2.82859	3.38116	3.08598	3.10372	2.93837	2.83237	2.86846	3.12672	2.83935	3.31484	2.89148	2.80354	3.19134	2.8527	2.81818	4.04185	2.94626	2.82713
GCNT7	4.02054	4.39036	3.90496	4.07555	3.86997	4.10187	4.18625	3.89776	3.95057	3.90474	3.89489	4.01201	4.1393	4.11891	4.4425	4.21984	4.06398	4.0483	3.95893	4.02407	3.93403	4.03046	3.92649	4.10708	4.26741	4.25677	3.95821	4.02163	3.99075	4.1399	4.13958	3.9455	3.99558	4.25401	3.97923	3.72048	4.01282	4.29799	4.01607	3.99774	4.02054	4.2449	4.18801	3.87671	4.02002	3.95523	4.1289	3.82505	4.1819
GFPT1	8.43851	8.2224	7.91138	8.6112	9.10109	8.3071	9.43722	7.9057	8.28715	8.1715	8.23202	8.70999	7.43127	8.10854	8.00214	7.64949	8.63852	7.75	7.94194	8.95953	7.47152	8.00151	8.69263	8.88945	8.2388	9.23822	7.81142	7.54683	7.89373	8.17366	6.92576	8.61215	8.61215	8.43771	8.27528	8.43771	8.70999	7.5971	7.65444	7.2189	8.37312	7.32457	8.03452	7.87693	7.39252	7.39788	7.6704	7.42165	8.90156
GFPT2	6.39358	6.93444	6.93968	6.676	5.10661	7.02206	7.29903	8.16041	6.84024	7.39113	7.85623	7.92225	8.19063	7.7886	5.11761	7.2621	6.96475	7.58274	7.68145	7.81365	7.71809	6.7675	8.33726	6.77535	7.26167	5.39973	8.08407	6.1701	8.10164	6.88748	5.50023	7.9913	6.78248	7.76399	6.76603	7.32457	6.2161	8.45732	8.33659	9.08519	5.42865	8.31816	7.92661	6.60279	8.91408	7.8964	6.33184	8.37143	4.60455
GLB1	8.85308	8.21137	7.46523	8.28168	8.81432	8.39793	7.60567	9.09627	8.13622	8.87155	8.5597	8.70234	8.47608	9.30101	8.3618	7.83759	8.49674	8.88823	8.62257	7.99324	8.44018	8.50501	8.31423	8.46558	8.44367	8.05009	8.66478	7.61593	8.53775	7.98465	9.341	8.04743	8.21414	8.00668	8.74144	8.52098	8.61674	7.32412	8.99057	8.19934	8.422	8.25841	7.97398	7.6908	8.79301	8.39224	7.64173	8.30408	7.50021
GMDS	6.98461	5.36186	5.53809	5.75717	6.90164	5.59329	7.12102	5.38624	5.76593	5.74282	6.2126	6.92794	5.20455	4.72842	6.19958	5.191	6.41552	5.05289	5.64367	7.08149	5.65329	5.69656	5.92434	6.16375	6.65692	8.44992	5.32681	5.44003	6.18482	5.08496	6.54595	5.93779	6.02057	6.96268	6.69148	5.16932	5.94348	5.44244	5.24191	4.7812	7.13773	5.03796	6.15149	5.68514	4.88765	5.07261	5.63992	5.05013	6.04861
GMPPA	6.76289	6.50724	6.61628	7.18041	7.11214	6.96268	7.53726	6.86913	7.24513	6.84289	7.41411	6.67831	6.97289	6.72903	7.80664	6.62024	7.00749	6.61866	6.93063	6.62921	6.61435	6.37635	7.04272	7.12522	7.01938	7.07936	6.43047	5.19158	6.64562	6.93289	7.72052	6.38487	5.49327	6.83634	6.17037	6.35382	7.08275	6.58255	6.54525	6.48	7.04388	6.81441	7.4339	6.34464	6.63095	6.28652	6.68034	6.15118	7.39834
GMPPB	6.14931	6.0832	5.86895	6.67866	6.02318	6.10297	6.27248	5.86411	5.67181	5.94934	6.05714	5.70517	5.84306	6.08973	5.99152	5.80593	5.94678	5.80265	5.74938	5.34466	5.59768	5.92604	5.86358	5.8754	5.75798	6.28872	5.72025	5.7634	6.05601	5.80811	6.34406	5.58903	5.44901	5.93517	5.44589	5.95322	6.36385	6.34464	5.91478	6.04213	6.16861	5.73379	6.54758	6.16226	5.75252	5.70658	5.74994	5.9716	6.75121
GNE	7.65552	8.95564	9.09198	7.46429	8.14906	8.04603	11.0225	7.51876	8.25083	7.02525	7.20407	8.71547	7.40523	7.87986	5.95776	9.15003	7.4615	7.73568	7.78801	7.2949	7.0585	7.35666	8.77122	7.6489	7.23563	8.20009	8.15756	7.92596	6.95856	8.18687	9.66085	7.31836	7.69865	6.54181	7.2159	8.44179	7.77744	7.14818	7.60083	7.67656	6.29989	7.62675	7.1796	7.53939	7.15863	7.20407	7.38874	7.4563	7.57805
GNPNAT1	8.33499	7.68975	8.30086	8.64567	8.57505	8.10655	7.75433	7.5496	8.81698	7.80373	7.94245	7.80842	7.81199	7.16791	7.93941	7.54337	8.20229	7.64233	7.56975	7.93809	7.42986	7.28722	7.16456	7.90957	7.59601	8.63949	7.50226	7.32632	8.27773	8.24706	7.56827	7.82542	8.33578	7.54839	7.87815	7.94547	8.51032	8.06469	7.68427	7.29809	7.96422	7.6317	8.82265	8.70791	7.4657	7.41327	8.3071	7.56236	9.19008
GNRH1	4.48408	4.62979	4.13741	4.70994	4.82684	4.63566	4.27094	4.17389	4.02602	4.21154	3.70858	4.04665	4.22979	4.35583	4.17606	4.84288	4.37037	4.24518	4.28509	4.6466	3.94173	4.08924	4.13769	4.55899	4.08846	4.2446	3.46898	3.93911	3.87158	4.24902	4.31025	4.76622	4.32625	4.38752	4.44222	3.74361	4.65946	3.63643	4.42084	4.28839	4.01768	4.34822	4.20212	4.04296	4.30439	3.84415	3.35408	3.85593	3.45589
GOLGA2	7.34292	7.76739	7.24046	6.92723	7.32548	7.17293	7.83632	7.19262	6.93402	7.017	7.16197	6.9876	7.02291	6.15407	6.54728	7.94662	7.01271	7.17778	6.92439	6.79918	6.99486	7.22102	7.34292	7.4235	6.91109	7.35812	7.09122	6.94938	7.04467	7.12566	7.53164	6.79327	6.6704	6.88748	6.9438	6.90311	6.49051	7.27575	7.11601	6.81342	6.57312	7.17444	7.14689	7.02525	7.02483	7.02907	7.36024	6.73307	7.02248
GOLGB1	6.92364	6.7622	7.09639	7.13951	6.88531	6.36051	6.91984	6.53944	6.55363	6.34406	7.0464	6.45418	6.34929	6.30645	6.72764	6.81007	6.6246	6.70284	6.55523	6.70081	6.61836	6.27524	6.73174	6.73208	6.60709	6.88531	6.5067	6.73766	6.75366	6.79259	6.61628	6.47128	6.33822	6.2611	6.45939	6.9013	7.17334	7.16456	6.59836	6.46116	6.8112	6.70647	7.37284	7.28119	6.43449	6.4089	6.88011	6.60416	7.37008
GORASP1	5.59435	5.48047	5.51782	5.47302	5.43517	5.68904	5.01485	5.77231	4.94183	5.28147	5.3884	5.46635	5.4289	5.46748	5.32423	5.35518	5.63026	5.59768	5.40692	4.83338	5.5237	5.71754	5.33704	5.39707	5.64182	5.59435	5.43284	5.38054	5.57136	5.26555	5.5659	5.19185	5.73108	5.17098	5.55634	5.81865	5.57767	5.5659	5.52468	5.14696	5.469	5.33228	5.49692	5.35413	5.36488	5.35544	5.36765	5.58793	6.34464
GOSR1	6.89712	6.83851	6.82415	6.82268	6.93018	6.81007	6.93968	6.28774	6.618	6.57945	6.29	6.9386	6.57579	6.61469	6.87415	7.19478	6.5097	6.64695	6.45255	6.90011	6.45418	6.59617	6.48688	6.98885	6.42078	6.7179	6.44228	6.93254	6.63232	6.52306	6.31933	6.85729	6.45387	6.26082	6.8126	6.50761	6.67324	6.90658	6.48752	6.56702	6.70081	6.86951	7.1707	7.12522	6.49413	6.49611	6.7907	6.67501	7.17778
GOSR2	5.57541	5.41306	5.46186	6.09033	6.09913	6.06141	6.17251	5.52759	6.1466	5.80837	5.6666	5.60836	5.65194	6.71298	5.70096	6.20605	5.84464	5.70859	5.59738	5.77181	5.79453	5.8751	5.81634	6.10675	5.63226	5.99836	5.76649	5.6047	5.76565	5.7726	6.10903	5.92403	5.66714	6.18349	5.93809	5.87226	5.98552	5.96049	5.51521	5.96412	6.5348	5.70291	6.04539	6.23078	5.81921	5.70716	5.8627	5.74773	6.2161
GPC1	5.64339	6.04889	5.582	5.50717	5.72656	5.98634	6.31898	5.93123	5.576	6.0248	6.25136	5.48378	5.6821	6.9386	5.73703	6.01882	6.36051	6.32937	5.57767	4.68492	5.99865	5.77455	5.62941	6.34377	5.58498	5.03124	5.64847	5.72831	5.15582	6.16196	5.58683	5.44951	6.01238	6.71981	5.6402	5.83999	5.76681	5.70068	6.21233	5.79673	4.74792	5.01398	5.36743	4.85121	5.84905	5.84361	5.22374	5.78948	6.26171
GPC2	4.28316	4.64916	4.26288	4.7725	4.47578	4.88956	4.51799	4.25103	4.30522	4.47464	3.84389	4.17233	4.0035	4.02809	4.33714	4.29885	4.40484	4.41375	4.46298	4.6223	4.2476	4.49205	4.16089	4.61104	4.48842	4.81235	4.33336	4.94401	4.45626	4.39125	4.8085	4.98013	5.06429	4.89468	4.94529	4.61324	4.56101	5.16046	4.16117	4.37977	4.42084	4.16285	5.2981	4.98813	4.06611	4.12222	5.56177	4.41212	5.32213
GPC3	3.77817	4.02054	4.0313	5.00344	3.52247	4.40289	3.71461	4.53069	3.69645	3.74539	4.15639	4.03676	4.09502	3.99641	5.97991	3.96989	4.0859	4.53011	4.26516	4.26183	4.74215	4.2223	4.16687	3.78515	4.88985	3.72476	4.5	3.92732	4.1811	4.02163	4.26683	4.63857	4.51653	3.9455	4.31457	4.90831	4.58869	4.56524	4.59599	4.96772	3.80573	4.53324	4.92731	4.29943	4.8755	4.79622	5.24506	5.06591	6.29739
GPC4	5.58279	5.56728	5.9524	6.5345	6.58438	7.57659	6.35662	6.52861	7.63573	6.24456	5.9162	6.67428	5.66324	6.42078	4.72448	6.13162	6.55186	6.23895	6.11891	6.48397	6.24102	7.06219	7.16323	6.55677	6.44584	6.1583	6.0018	5.85325	5.60257	6.72764	6.92905	6.7657	6.36624	6.31273	6.7445	6.5896	5.97048	6.44004	6.40983	5.95605	6.3532	5.77538	6.15529	5.91247	6.20282	6.47759	5.76649	6.53683	6.28404
GPC5	7.23951	2.93133	2.73294	2.72672	2.76779	2.75979	2.72342	2.71764	2.72643	4.65239	2.72071	2.72702	2.75039	2.74261	2.71274	2.91564	2.73181	2.74036	2.71368	3.58006	2.72967	2.74179	2.7501	2.72101	4.1057	2.70614	2.7327	2.70868	3.91884	2.59667	2.7081	6.47258	3.9423	2.74179	3.71669	2.97465	2.75515	2.75592	2.77413	2.76409	2.71674	2.57375	2.73561	2.74572	2.73092	2.75674	2.71527	2.76435	2.80077
GPC6	7.13514	7.55014	5.35052	6.21089	6.87853	8.3501	7.80428	7.29159	7.92292	7.31959	7.34671	6.23895	8.83804	6.01686	6.45028	7.2638	7.75748	7.90634	7.74534	7.45051	7.07641	7.05036	7.94992	7.95596	7.00913	6.06171	6.73903	5.79065	7.424	6.99766	10.0815	8.21199	6.34218	7.15739	5.8212	6.92059	6.33217	5.91247	7.56766	8.94141	6.45418	7.72109	5.19269	5.66411	8.54877	7.16238	5.77206	7.76568	4.41828
GRIA1	3.02579	3.10911	3.09217	3.13109	3.06018	3.08816	3.18554	3.08759	3.10562	3.03153	3.09296	3.02872	3.05874	3.05202	3.08352	3.02258	3.08433	3.06984	3.01123	3.09078	3.01103	3.1339	3.30898	3.04567	3.02062	3.13689	3.08371	3.18693	3.05285	3.18316	3.18985	3.10013	3.1935	3.11737	3.05327	3.11716	3.4762	3.21218	3.11458	3.13014	3.12142	3.11437	3.59857	3.16333	3.04607	3.08371	3.32515	3.12364	3.49766
GXYLT1	4.86018	5.6031	5.52914	5.35337	5.71447	4.93687	4.8118	5.46455	5.4336	5.56241	5.23428	5.80093	5.71392	5.30907	6.87293	6.28564	5.41279	5.57987	5.71474	6.40464	5.58903	5.44924	5.98302	5.25775	5.28834	5.21657	5.3185	5.2708	5.35518	5.37735	4.9301	6.01519	5.84796	5.34869	5.50189	5.41875	5.54247	6.00468	5.76211	6.95591	5.58441	6.16284	5.45663	5.52395	6.08144	5.96361	5.56779	6.07639	5.59963
GXYLT2	6.13282	7.5666	6.57609	6.15293	6.00436	7.37776	7.28975	8.02979	7.55864	8.0192	7.93998	7.21758	8.65249	7.44257	4.14654	7.48615	6.66233	8.11617	8.06865	7.74647	7.74121	7.56874	8.8063	7.09765	6.68716	5.46827	8.46831	5.12486	7.37676	7.42306	5.60206	8.09179	6.15588	7.972	6.01852	7.65773	5.77567	5.33909	7.72332	8.86385	4.20184	8.04875	5.68821	5.60175	9.21604	8.17669	7.60355	7.65057	5.76593
HCRT	3.63976	3.2694	3.23465	3.17564	3.21642	3.22111	3.22361	3.29762	3.22884	3.22767	3.21752	3.24232	3.72971	3.21505	3.22111	3.21986	3.23152	3.35935	3.20696	3.26982	3.21257	3.23838	3.20568	3.23007	3.23152	3.22658	3.37029	3.1419	3.22748	3.25647	3.40588	3.21752	3.22303	3.21011	3.23689	3.17955	3.13745	3.12652	3.16931	3.17975	3.21055	3.18215	3.04447	3.1359	3.40293	3.18171	3.07003	3.18091	3.10687
HEXA	5.83801	6.16375	5.65271	6.10064	5.63371	5.771	5.82142	6.0894	5.88544	5.82749	5.70068	5.78618	6.05121	5.86527	5.23875	6.20167	5.65994	6.25567	6.11262	6.09205	6.1761	5.94736	5.78948	5.61213	5.68904	6.04712	5.9162	6.01156	5.85768	5.83196	5.95808	5.8927	5.5841	6.0237	5.76136	5.72462	5.92687	5.77936	6.42301	5.9805	5.44562	6.23296	5.77886	5.95776	6.22601	6.17064	6.04861	6.05742	6.0352
HEXB	10.9927	10.7343	9.65158	11.253	10.4747	10.5723	10.509	11.083	10.8611	11.3301	10.7916	11.2101	11.1589	11.1081	9.82268	10.3962	11.166	11.1733	11.0949	10.9804	10.6793	10.845	11.0225	10.9201	10.5216	11.1218	10.8081	10.8349	10.6381	10.4125	10.6476	11.166	10.5763	11.253	10.4385	10.6647	11.2021	10.8935	11.5762	10.8498	10.2172	11.3034	10.8253	10.9201	10.8303	10.8611	10.5133	11.1508	10.3291
HGFAC	4.32051	3.9431	3.91676	3.91253	3.93264	3.89009	3.88113	3.91942	3.89622	3.78389	3.79561	3.92677	3.85084	3.88677	3.93192	3.7842	3.78964	4.07087	3.93264	3.91833	3.77867	3.9389	3.96035	3.97255	3.93935	3.90002	3.89538	3.84501	3.93002	3.9423	3.92649	3.8828	3.91388	3.86944	3.95188	4.52957	4.0354	3.96481	3.85113	3.9356	3.85059	3.95295	4.37151	3.98	4.01665	3.97231	4.99432	3.92889	5.25041
HID1	5.83605	5.60071	5.28834	6.30989	5.62032	5.58708	5.86383	5.00071	4.67816	4.87087	5.29634	5.11375	5.011	4.84064	5.17898	4.99649	5.04528	5.02135	5.03255	4.81717	5.42446	5.43734	5.26506	5.1022	5.96218	6.40436	5.02449	5.2414	5.73949	5.29658	5.05937	4.30026	5.66244	4.68142	6.17251	6.12067	5.83167	5.53835	4.97068	4.79869	5.43841	4.57451	5.86812	5.66996	4.86954	4.9224	6.84328	5.07804	7.59864
HM13	5.79673	5.71526	5.76935	6.2346	6.10846	5.96516	6.22778	5.58521	5.87397	5.62598	5.80149	5.66881	5.74528	5.78503	6.36449	5.84905	5.61753	5.74197	5.68927	5.99435	5.79423	5.7677	5.66964	5.97247	5.97218	6.26237	5.66996	6.0871	5.74061	5.71575	6.40252	5.58498	5.55747	6.04183	5.62754	5.85934	6.20254	6.46465	5.75359	5.79699	5.59279	5.86299	6.4656	6.28652	5.70461	5.65354	6.50761	5.79895	6.75366
HMGB1	10.8498	11.1881	11.2462	10.3644	10.8611	10.761	9.9116	10.7235	11.0683	10.8611	10.7755	10.8033	11.0225	10.0815	10.6647	10.3799	11.2608	10.6046	10.7508	10.9201	10.8349	11.0041	11.166	10.745	10.8935	10.9987	10.5763	11.083	10.5856	10.9421	10.5301	10.8498	10.8985	10.8253	11.0358	10.7135	10.4543	10.2205	10.66	11.1508	10.5948	10.9621	10.0127	10.3878	10.9086	10.8716	10.5342	10.7656	10.4621
HSD3B1	2.80376	2.79299	2.80681	2.76354	2.80104	2.7792	2.80581	2.78202	2.80104	2.78762	2.79225	2.78819	2.79091	2.79374	2.78484	2.80758	2.78594	2.79144	2.81463	2.80581	2.79646	2.80203	2.81155	2.80354	2.79019	2.90383	2.78568	2.75321	2.7894	2.81178	2.78666	2.79499	2.80483	2.81789	2.80483	2.77996	2.73208	2.74423	2.76917	2.78202	2.77547	2.74423	2.72672	2.72375	2.79945	2.76354	2.7359	2.74572	2.80508
HSD3B2	2.80581	2.83023	2.8137	2.9446	2.81712	2.80077	2.82542	2.81007	2.80354	2.80832	2.85756	2.81587	2.80508	2.80303	2.80603	2.83495	2.81102	2.80326	2.82149	2.81991	2.81007	2.82834	2.80508	2.81818	2.80805	2.77838	2.81667	2.80907	2.82252	2.83002	2.81247	2.8137	2.81843	2.78868	2.81247	2.81439	2.78845	2.81417	2.80652	2.81616	2.81031	2.79551	2.83472	2.8868	2.82834	2.77811	2.80508	2.80077	2.83775
HSPA5	9.27566	9.22941	9.59082	9.98527	9.8765	10.0883	10.6515	9.40738	9.3906	9.73301	9.43232	9.10436	9.69214	10.0851	9.76761	8.80716	8.77828	9.32213	8.83252	10.2103	8.6596	8.62844	9.49679	9.81728	8.48688	9.22778	8.86138	9.28621	9.23822	9.47324	9.56452	9.21453	8.71547	9.87071	8.85207	9.80957	9.68653	9.31319	9.13318	9.42319	9.03565	9.24164	9.36433	9.45072	8.66943	8.54175	9.50631	9.08069	10.1232
HSPG2	7.50226	7.94604	7.5444	6.85021	7.27357	8.15756	6.88671	8.50139	7.23605	7.32907	8.07932	7.97668	8.08819	6.54693	6.44389	7.63848	7.60135	7.62842	7.86282	6.81302	8.44732	8.73928	8.24403	7.83632	8.56261	7.49358	8.57233	7.26033	8.50859	8.52472	6.71546	7.00238	7.92596	8.04468	8.31423	7.87751	6.9639	7.08102	8.31898	7.40844	6.18783	7.40367	6.78894	6.8112	7.94141	8.69054	6.70245	8.57871	5.67074
HTR5A	3.93646	3.87505	3.9218	3.94822	3.87158	3.93535	4.0408	3.8831	3.87974	3.8896	3.92283	3.80729	3.89751	3.94337	3.90447	3.84659	3.90525	3.86732	3.88858	3.92974	3.89569	3.92102	3.91914	3.8431	3.91522	4.06232	3.91064	3.81309	3.94528	3.96035	3.95979	3.87052	3.89276	3.87888	4.12648	3.94337	4.18272	3.89332	3.89304	3.94366	3.93911	3.85925	3.95243	3.88934	3.94605	4.03596	4.18061	3.91698	4.03348
HYOU1	8.22033	7.57199	8.5597	9.62205	8.73706	8.76569	8.65742	8.3334	7.71013	8.39641	9.12562	8.23122	8.61398	9.06843	8.62455	8.52839	8.12781	8.49062	7.95714	8.53213	8.18835	8.78537	8.37395	8.63759	8.17517	8.60912	8.12304	8.58179	8.37554	9.45485	8.78049	8.06469	8.73928	9.19341	8.71326	9.7129	9.15886	8.70143	8.48155	7.72743	8.21722	8.01119	9.45662	9.26775	7.98394	7.83759	9.95028	8.2367	9.6421
IL15	4.30912	4.55125	4.72232	4.25755	4.81064	4.95934	4.57058	4.99084	5.0812	5.04448	4.88457	5.00234	4.76148	6.10493	3.65494	4.25913	4.542	4.85304	5.0826	4.95194	5.13383	4.89146	4.94081	4.63287	5.19704	4.82631	5.01705	4.83204	4.96823	4.89171	4.49916	5.07666	4.55707	4.77278	4.59788	4.52028	4.61466	4.564	4.8387	4.99879	5.21998	4.81006	4.5475	4.06342	5.00101	4.82712	4.60013	4.99801	4.00381
INS	13.0682	13.3366	13.8925	13.2426	2.19855	5.98099	12.1418	14.6479	12.6483	14.4597	12.5428	13.7866	10.2103	2.19855	9.62394	14.1424	10.5216	12.9407	13.3366	13.1745	13.1099	13.4035	2.24726	4.23723	2.19855	2.19855	14.0373	13.694	13.6335	9.81205	8.39551	14.3042	13.4249	2.28722	13.0682	13.1962	13.0243	13.2687	14.3394	14.3782	2.11055	14.5683	13.1745	12.9407	14.2719	14.1057	12.9407	13.9309	12.435
KCNJ2	5.47511	5.7445	5.19324	5.39476	5.28804	6.58599	7.26957	6.19023	6.36147	5.90897	6.36898	5.37008	6.46999	4.47152	5.83167	5.08835	6.77035	5.82863	6.7304	6.7632	6.22181	5.02957	7.4657	5.7491	5.75359	6.31209	5.75104	5.23377	6.79768	5.82571	5.07287	6.10267	5.02237	6.23205	5.23149	5.14434	4.88123	5.08496	6.90696	6.59127	5.96846	7.53316	4.43349	4.72507	6.5197	5.07826	4.6127	5.79423	4.37729
KDELR1	8.50953	8.97741	8.6335	8.74717	8.79739	8.83252	8.00533	8.30328	9.30252	8.34295	8.61215	8.40233	8.53213	8.16573	8.79631	8.59173	8.88074	8.73706	8.51585	8.16041	9.24775	8.73594	8.59681	9.00668	8.87155	9.15886	8.97327	8.83359	8.72285	9.23996	9.45271	8.03945	8.88321	9.26279	9.28621	8.82804	8.72401	8.28485	8.49503	7.84905	8.41946	7.80547	8.63949	8.18339	8.73271	8.7057	9.17624	8.57124	9.41981
KDELR2	9.82568	9.58177	9.67179	9.72828	10.3919	10.3464	10.2809	9.61736	9.87071	9.78732	10.2699	10.0815	9.74837	10.0309	9.24775	9.42481	9.8765	9.56689	9.61736	9.5864	9.95028	9.84341	10.0781	10.3464	9.70281	10.3763	10.0156	9.39757	9.77998	10.2103	9.80477	9.91742	10.0342	10.1694	10.0558	9.92327	9.75331	8.91163	9.5774	9.42159	9.79711	9.11983	8.84976	9.16997	10.0005	9.5164	9.57314	9.39238	9.99802
KDELR3	7.49871	6.76893	6.84905	6.86709	7.71416	8.77356	9.55378	7.11765	7.94073	7.34481	8.16802	7.54839	6.98577	7.75683	5.96077	7.03284	7.22877	6.58863	6.80392	8.12098	6.69258	6.3672	7.186	7.68427	6.66336	7.72167	6.69392	5.94877	6.30392	7.40568	8.16372	7.64453	6.6901	7.86706	6.70861	7.02525	6.85767	5.8921	6.99566	7.33934	5.80455	6.47905	6.94231	6.84472	7.30266	6.21203	7.22565	6.61726	6.77387
KERA	2.88931	3.77915	2.92959	2.78789	3.05675	3.57001	2.92039	3.82689	4.89717	5.09935	3.89463	3.58294	2.9811	2.92387	2.99119	2.90089	4.48434	4.53095	2.88167	2.96002	3.08759	3.23047	2.98848	4.28425	2.90404	3.24711	3.51259	2.66754	3.06424	2.86456	2.91495	2.91224	4.00565	4.1068	3.5216	4.16633	2.83334	2.80354	3.42217	3.1717	2.93277	2.87646	2.82094	2.73643	3.09021	3.50821	2.76711	2.86135	2.78868
KRTCAP2	7.90033	7.12019	7.75502	7.61593	7.80547	7.39976	7.8616	6.72437	7.17242	6.82894	6.99201	7.20144	7.82423	7.53939	7.6317	7.36688	7.21407	7.25303	6.94269	7.34292	6.95011	7.26915	6.80609	7.25213	7.7757	7.95049	7.00669	8.1505	7.37329	7.3472	7.40322	6.98345	6.63749	7.69535	6.8112	7.43436	7.67809	8.05009	7.05411	7.51227	6.88226	7.22917	8.13407	7.87751	7.01115	7.00038	8.39378	7.07239	7.7136
LARGE1	4.17093	4.02732	4.16338	4.18246	3.95474	4.18083	3.90188	3.94901	3.93646	3.74709	4.12413	3.91622	3.96115	3.99456	4.83751	3.98381	4.15367	3.91806	3.99974	3.93704	3.95057	4.06452	4.0019	4.0564	4.03182	4.08793	4.0238	3.86857	3.94283	4.16735	4.20519	4.13404	4.11655	3.92283	3.93617	3.92732	4.11121	4.15945	4.03046	3.97661	4.55393	3.97309	4.11149	4.03291	4.08738	3.97738	4.13878	4.07087	4.39946
LARGE2	5.51725	5.36	6.44454	7.06795	6.35196	6.61931	7.02248	5.61753	5.33122	5.52576	6.26139	5.90452	5.68738	5.66051	6.75797	5.3469	5.98223	5.60836	5.8383	6.00407	5.85689	5.4387	5.35977	5.98132	5.57389	6.13621	5.85988	6.69633	6.10877	5.7015	8.08819	5.31798	6.4477	5.46717	5.41628	6.85685	6.94421	6.97715	5.78304	5.67649	5.7102	5.51434	8.38734	6.87712	5.75104	5.53537	6.42633	5.86159	8.74624
LFNG	6.38733	6.33663	5.84821	5.86585	5.65891	6.11181	5.49176	6.01012	5.64339	5.78368	6.42666	6.33465	6.27741	5.86329	5.94958	5.9524	6.27956	5.5938	5.48861	6.20546	5.77619	6.32874	5.61481	6.61501	5.67596	6.21723	5.85689	5.71197	5.8366	5.72229	4.54486	6.54319	6.11891	6.07056	6.64869	6.47759	5.87367	5.98326	5.4235	5.45435	5.48884	5.62119	5.85491	5.8519	5.58903	5.8212	5.83246	5.29039	6.27493
LGALS3	9.74586	9.66705	9.31119	7.39336	8.94393	9.361	9.73301	7.9211	9.5044	9.02535	8.30945	9.42159	9.78732	7.85223	6.36358	8.3692	10.0498	8.57124	9.01846	8.60738	8.422	8.11416	8.00352	9.43397	9.45072	10.3799	8.55651	9.02113	8.69486	9.19496	8.58704	8.45253	9.40911	9.12868	9.43915	8.23452	7.56975	7.67758	7.7591	7.2863	9.65363	8.22685	6.49744	7.60885	7.78095	7.7757	7.32236	7.09217	6.4773
LHB	5.85217	5.44851	5.11978	5.41335	5.15149	5.41306	5.09553	5.5885	5.11456	5.07205	5.19531	5.29499	5.13878	5.20105	5.26961	5.41522	5.14994	5.06591	5.08924	5.1168	4.89362	5.27109	5.10685	5.13383	5.35443	5.1799	5.00532	5.02873	5.13325	5.58683	5.21303	5.1276	5.62414	5.04143	5.42325	5.73565	5.22109	5.40137	5.16958	5.12085	5.24062	5.23848	5.29039	5.37427	5.18537	5.1827	5.19429	5.18399	5.73813
LIN28A	3.08558	3.3512	3.14004	3.18594	3.10977	3.14081	3.09161	3.0914	3.0417	3.08311	3.09689	3.08332	3.11658	3.10539	3.0373	3.08637	3.11816	3.10294	3.05242	2.99214	3.06502	3.13745	3.11137	3.16503	3.21642	3.17482	3.12033	3.2661	3.04447	3.1124	3.12162	3.07524	3.11716	3.02562	3.10455	3.08254	3.11676	3.15086	3.18898	3.02277	3.30231	2.93857	3.23727	3.11621	3.0437	3.12321	3.14539	3.13553	4.01308
LMAN1	6.52338	6.77535	6.74152	8.41076	7.63455	8.28397	8.40152	6.96747	7.71471	7.69031	7.33474	7.04237	6.91687	8.03048	7.97733	6.35597	7.31754	7.90893	7.42501	8.05195	7.67706	7.54337	8.08407	7.62139	6.94082	8.1058	7.69535	7.71877	7.4786	7.48075	9.15886	8.31184	7.99575	8.10854	7.31879	8.77828	8.40488	7.46963	8.08671	7.31919	8.01718	6.82602	8.21137	7.62189	7.98465	7.67145	8.59975	7.59542	9.25942
LMAN1L	4.49291	4.18083	4.21787	4.23814	4.26872	4.22754	4.1308	4.23451	4.11486	4.19694	4.24356	4.08924	4.20465	4.36455	4.22395	4.29857	4.25562	3.99348	3.73833	4.20624	4.26541	4.20726	4.29347	4.72533	4.22039	4.25044	4.16365	4.18013	4.20679	4.27232	4.66312	4.14981	4.61785	4.21427	4.25595	4.1811	4.25755	4.1572	4.28642	4.71954	4.34235	4.31845	4.39068	4.17959	4.3623	4.26845	4.33687	4.59302	4.20977
LMAN2	5.88603	5.99179	6.14488	6.54658	5.94	5.93439	7.70465	5.7163	5.98744	5.85298	5.84713	5.79481	5.49905	6.20076	6.61764	5.44323	5.98686	5.86923	5.7547	5.84464	5.78421	5.96049	5.99004	6.00152	6.29807	6.07087	5.77962	5.92987	5.71474	6.02088	6.03115	5.78836	5.73081	5.92604	5.8021	6.19842	6.27551	6.43531	5.8212	5.8391	5.93973	5.63287	6.63434	6.55812	5.74254	5.78275	6.3672	5.66466	6.52576
LMAN2L	6.69886	6.70897	6.58473	7.43183	6.59234	7.47762	7.29437	7.21277	7.54793	6.94938	6.85087	6.71477	7.09722	7.7136	8.10508	6.73554	6.6704	6.61051	6.65894	7.01307	6.55296	6.12034	6.54555	6.87025	6.38702	6.81958	6.34377	6.79037	6.309	6.91036	5.85462	7.28585	6.70608	6.64119	6.32719	6.52005	7.63628	7.25554	6.52505	6.81706	6.43047	6.7914	7.34952	7.75	6.34377	6.58663	6.55055	7.09428	6.89121
LRPAP1	5.88576	5.91197	5.81803	6.86406	6.35662	5.63454	5.5841	6.20193	5.92659	5.74341	5.66381	5.64511	6.07197	5.10609	7.1223	5.99747	6.11742	6.36995	6.27214	6.20337	5.7035	5.3771	5.70487	5.74145	5.59517	5.5268	5.80976	5.64312	6.07287	5.75229	5.0812	6.24245	5.55055	5.41306	5.69497	5.77538	6.85452	7.03532	6.21552	6.19556	6.04861	6.83782	7.14647	7.08474	6.0352	5.61046	6.14964	6.68578	6.50284
LUM	9.59322	10.0656	9.44677	9.341	9.49889	10.9927	9.76558	11.0626	10.8404	10.66	10.5908	10.845	11.7192	8.92374	7.96681	10.6476	10.4959	10.914	10.4664	10.5644	10.8404	10.4004	12.0125	10.9987	9.5774	9.95878	10.9866	9.73065	10.7034	10.7401	9.07589	11.1218	10.5468	11.612	10.2337	10.7401	9.26775	8.79739	10.8935	11.9493	7.96875	10.6515	8.46098	9.65819	11.49	10.9621	10.8081	10.729	7.4911
MACO1	6.31898	6.47226	6.56411	7.03195	6.80749	6.37731	6.37054	6.96268	6.77138	6.58831	6.48752	6.84128	6.66686	5.59738	6.87597	6.88789	6.55055	6.82455	6.40193	7.18439	6.34892	6.48459	6.26237	6.511	6.84754	6.72437	6.5129	6.28013	6.43971	5.611	6.12878	6.78529	6.37575	6.82023	6.59127	6.53882	6.85999	7.19659	6.88338	6.70788	6.70897	6.45283	7.13147	7.21185	6.54145	6.23665	6.77647	6.72903	7.22148
MAGT1	8.67232	8.35264	8.6112	9.15003	8.43851	8.81432	9.16499	8.72841	9.07589	8.54354	8.50697	8.57588	8.80514	8.63949	9.13024	8.66377	8.69152	8.59474	8.41863	9.15288	8.72961	8.84849	8.62547	8.71755	8.0821	8.66648	8.28792	9.01318	8.54777	8.68952	8.53873	8.64473	8.55246	8.85539	8.71951	8.9635	8.93352	8.6596	8.68317	8.78967	8.2761	8.31104	8.72401	9.23292	8.44455	8.45158	9.14051	8.30563	9.1438
MAN1A1	7.24635	7.56027	6.83217	9.29786	7.96748	8.1715	6.65757	8.85085	8.49327	8.52384	8.27213	8.47526	7.86216	6.45904	9.35003	7.4294	8.03186	9.48689	8.49503	8.49327	9.68133	8.66377	8.5597	8.31583	7.88169	8.53421	9.45485	9.74313	8.71096	7.40799	7.12775	9.11491	8.97741	8.37068	8.15682	9.72547	9.26454	8.19146	9.5026	9.62638	9.28269	8.8702	8.65249	8.68748	9.71842	9.62394	9.37391	9.35206	9.13923
MAN1A2	4.75701	5.3373	5.05688	5.82485	5.21599	5.06112	5.04392	5.03773	4.92292	5.13187	5.02267	5.26612	5.14117	5.00101	5.50771	4.83581	5.10869	5.16125	5.0852	5.34563	5.1401	5.07261	5.13102	5.02394	5.01286	5.07205	5.20135	5.10901	5.13023	5.05429	4.95714	5.58708	5.2317	5.15608	5.20049	5.62303	5.66267	5.65941	5.22525	5.26856	5.32109	5.0691	6.6298	5.62362	5.40663	5.30014	5.6613	5.23328	6.22569
MAN1B1	6.95896	7.31836	7.14001	6.82602	6.95011	6.85685	7.44307	7.04153	6.80782	6.96628	6.97331	6.66721	6.77535	6.97047	6.33626	6.91311	6.65962	7.03571	6.85649	6.44931	6.72693	6.89379	7.12149	7.09998	6.78103	6.79214	7.106	6.728	6.95742	7.1757	7.2415	6.41486	7.22917	6.94899	7.38085	7.34582	6.58224	6.74727	7.00507	6.78455	6.22842	6.65348	6.77106	6.46027	7.12814	7.09639	6.73307	6.88606	7.25695
MAN1C1	5.73188	5.93123	6.17518	6.08056	6.01267	5.84412	6.83591	7.71302	6.41519	6.7914	6.44325	6.57772	6.56477	4.33656	5.06482	6.44419	6.61726	6.89896	6.96628	6.75625	7.13821	6.48303	6.86598	5.30217	6.16923	4.127	7.52021	5.94593	6.68285	6.48459	4.39629	7.39488	6.19442	6.01659	5.89586	6.18402	6.28497	6.00322	7.40659	8.03735	5.99407	7.22613	4.29799	6.19556	8.15756	7.41411	6.28443	7.79472	3.80523
MAN2A1	8.68533	8.14544	7.40026	9.22301	8.74376	7.81088	7.6317	8.54452	8.34214	8.17801	7.82308	8.53513	7.97331	8.19722	9.24624	7.73694	8.33264	8.99739	8.44992	9.14236	8.34456	8.50047	8.04134	8.48079	8.12781	8.45649	8.28965	8.48428	8.16573	8.14044	7.58587	8.89314	8.28397	8.24483	7.94245	8.80514	9.27566	8.6465	8.96198	8.69597	9.59549	8.33264	8.94272	9.1119	8.66478	8.47965	8.96925	8.60063	9.35761
MAN2A2	6.46716	6.76532	6.69324	7.25303	6.37824	5.78218	6.23665	6.47701	5.91515	6.17037	6.05859	6.71171	6.52927	5.79731	7.41835	6.26356	6.5348	7.02754	6.56872	6.53683	6.72234	6.44454	6.61469	6.06141	6.57059	6.98274	6.52697	7.23087	6.35067	6.46682	6.72094	6.60015	6.52505	6.15893	6.26767	7.02291	7.22917	7.35301	6.65692	6.53128	6.67428	6.84686	7.32548	7.74647	6.47701	6.58473	7.55267	6.96056	7.51876
MAN2B1	8.27296	7.74473	7.54732	7.64514	7.28071	8.01063	7.37329	8.1546	7.6791	7.93349	7.84464	7.54387	8.12512	8.08474	7.76739	8.00937	8.16932	8.14252	8.29055	7.76038	8.98406	8.83591	8.12304	7.33474	8.32948	7.35666	8.63949	7.81607	8.44821	7.93941	8.54262	7.3522	7.27726	8.04813	7.89779	7.74874	7.90957	6.60046	8.81698	7.85286	7.00277	8.60063	7.56607	7.59601	8.70999	8.76025	7.42986	7.972	8.01992
MAN2C1	5.67294	5.61858	5.96592	5.75772	5.51549	5.5202	5.7848	5.70886	5.27109	5.29238	5.62277	5.56752	5.44491	5.45487	5.63287	5.51468	5.28804	6.11862	5.45487	5.45918	5.74584	5.63863	5.70122	5.33578	6.01432	5.53483	6.02729	5.42301	5.46321	5.28278	5.58498	5.39707	5.39136	5.4279	5.50689	5.87338	5.75359	5.7767	5.65623	5.46427	5.56619	5.81526	6.49611	6.21168	5.81835	5.50397	6.55906	5.97936	6.79037
MANEA	4.86265	4.25327	4.13516	4.73657	4.60515	4.8073	4.48811	4.45274	4.78855	5.05883	4.4955	4.86924	4.57965	4.90531	5.48186	4.54003	4.79597	4.73768	4.46786	5.33627	5.15608	4.61758	5.22399	4.81518	4.52525	5.00317	4.58463	4.44222	4.59788	4.15263	4.46126	4.91935	4.69282	4.94183	4.48382	4.86244	4.8001	4.48294	4.96372	5.12059	5.29265	4.41998	4.43807	4.84371	5.18063	4.67545	4.88821	4.54117	5.29011
MAPK1	6.32784	6.15176	5.97535	6.56872	6.28497	6.53846	6.31332	6.26858	6.74555	6.5215	6.63719	6.43387	6.38672	6.20483	6.47508	6.32752	6.51516	6.4634	6.47874	6.73482	6.51324	6.39543	6.38605	6.41288	6.30989	6.49581	6.35959	6.02269	6.32245	6.71546	6.51229	6.56319	6.41486	6.90427	6.36898	6.76924	6.60046	6.04569	6.58316	6.60185	6.48886	6.30837	6.65757	6.16951	6.65273	6.45841	6.17064	6.43323	6.8845
MAPK3	8.44732	8.67971	8.49503	7.47613	7.76739	7.99741	7.84235	8.03525	8.03599	7.82845	7.84777	8.03382	8.09505	7.21977	7.18521	7.16154	8.29055	7.7634	8.04342	7.27396	8.29833	8.40579	8.19722	8.3404	8.37963	8.40152	8.18401	7.99741	7.94141	8.2396	7.01194	7.51019	8.515	8.26108	8.79066	8.39891	7.4911	7.25477	7.76454	7.41411	8.53873	7.41327	7.91775	7.51126	7.93418	7.92785	7.79705	8.02722	7.31658
MCFD2	6.16136	6.60416	6.19209	7.39633	6.64531	6.41855	6.41144	6.58896	6.78713	6.56377	6.38425	6.52441	6.54982	6.75226	6.42334	6.67831	6.50568	6.99324	6.71724	6.52306	6.56105	6.73903	6.66936	6.30776	6.29	6.90088	6.66971	7.12683	6.55427	6.41552	6.82304	6.62094	6.32628	6.49413	6.44167	7.34904	7.25774	7.91709	6.54728	6.72012	6.47478	6.27524	8.19864	8.05264	6.52605	6.60851	7.88948	6.71203	8.42292
MGAT1	7.44908	7.6853	7.61376	7.66541	7.65711	7.94782	6.87332	8.08407	7.50924	7.97733	8.37963	7.82484	8.32308	7.02248	7.70029	7.27575	8.18109	8.31184	8.49142	7.39633	9.03565	8.459	8.5228	8.09238	8.05838	7.91907	8.77356	7.88645	8.54076	8.24867	7.18132	7.4042	8.38639	8.51216	8.6506	8.80956	7.83632	7.69865	8.59086	7.93809	7.52599	7.94604	7.87155	7.48757	8.92133	8.38313	8.55246	8.08751	8.32208
MGAT2	7.03965	6.8406	6.85685	7.76684	7.80007	7.4042	7.30454	6.9247	9.07735	7.54635	7.34066	7.05411	7.57957	7.26957	7.61272	7.18306	7.34952	7.26695	7.08808	7.48668	7.00792	7.71471	7.09469	7.55753	6.90311	7.09854	7.22613	6.37892	7.2705	6.83149	6.71235	7.22195	7.20267	7.44077	7.23382	7.44751	7.33889	7.19048	7.38874	7.73461	7.78153	7.14256	7.44024	7.20488	7.37154	7.36958	7.04198	7.16238	7.88352
MGAT3	4.68059	5.21548	5.43812	4.92922	5.06937	5.06884	4.72147	4.52957	4.67208	4.60906	4.85201	4.65977	4.79573	4.86071	4.57561	4.93826	5.23642	4.66785	4.56811	4.88423	4.71368	4.95766	4.80294	5.01238	4.94081	5.09689	4.8073	4.93887	4.78883	5.29912	4.89494	4.74766	4.92812	4.82127	5.13159	5.06535	4.96636	4.48609	4.8073	4.61976	5.4147	4.76148	5.24769	5.22269	4.73463	4.91471	4.6738	4.96419	5.03981
MGAT4A	5.03305	5.8444	5.20928	6.48366	5.12942	4.78661	5.44219	5.94348	6.15529	6.15442	5.84848	6.30645	6.23328	5.89809	6.07489	5.65595	5.18895	6.32086	6.18964	6.52762	6.1242	6.28932	5.68849	5.2353	5.62541	5.50049	5.88919	5.97795	5.9203	5.44668	5.25177	6.42884	5.46212	4.80953	5.75611	5.93722	6.41823	6.62163	6.29842	6.1478	6.6825	6.48593	7.50375	6.64437	6.24829	6.11628	6.57945	6.28932	6.72364
MGAT4B	9.03565	8.52384	9.01186	7.87394	9.13625	8.36837	7.39788	8.19519	8.19722	8.70234	8.85085	8.90913	8.13691	10.4664	8.69383	8.18687	8.52839	8.12649	8.40315	7.75683	8.60738	9.37195	9.05886	9.70509	10.1855	8.79631	8.24936	8.3641	8.48346	8.85539	8.63659	7.57805	8.89901	9.02848	9.10109	8.76677	8.06051	7.64949	8.14044	7.32818	10.0469	7.79416	7.5735	7.5429	7.7363	8.34766	7.36958	7.55319	7.73507
MGAT4C	2.68947	2.70963	2.68636	2.70524	2.63669	2.65193	2.65037	2.92833	2.67892	2.69057	2.6283	2.66685	2.63804	2.64326	2.68133	2.68202	2.65433	2.68444	2.67287	2.69773	2.61039	2.6283	2.63669	2.6217	2.69189	2.69804	2.65398	2.76917	2.67392	2.63713	2.70586	2.68984	2.75293	2.72187	2.63804	2.67532	2.73619	2.75095	2.74261	3.13689	2.86918	2.72407	2.80303	2.79118	2.79893	2.78868	2.82834	2.83424	2.87129
MGAT4D	2.55705	2.56471	2.55157	2.62367	2.5725	2.55773	2.55988	2.56403	2.57734	2.55849	2.54994	2.56676	2.56752	2.57015	2.57675	2.64605	2.56125	2.55705	2.57608	2.57078	2.5714	2.57734	2.59017	2.56881	2.57608	2.56059	2.62276	2.60845	2.5725	2.59388	2.57015	2.5731	2.56676	2.57734	2.59337	2.58169	2.58852	2.58679	2.59073	2.59611	2.59444	2.60126	2.60243	2.57375	2.57844	2.58792	2.62461	2.5896	2.72342
MGAT5	6.09639	6.26648	6.32212	6.06538	6.08739	5.77455	5.95488	5.67262	5.71945	5.90428	5.81335	6.16226	6.00585	5.27723	5.97651	5.84223	5.80837	5.8212	5.7128	6.28131	5.80729	5.87367	5.79093	6.2495	6.27898	6.34623	5.72801	5.38893	5.6854	5.93945	6.53808	6.18933	5.66466	6.24011	5.69113	5.63834	6.07374	6.52505	5.81749	6.09147	6.17518	5.96361	5.7547	6.20668	5.79731	5.78368	5.71418	5.92161	5.96335
MGAT5B	3.99821	3.89981	3.90684	3.89515	4.09226	3.9016	3.87857	3.91004	4.12113	3.96779	3.9032	3.91176	3.76082	3.79928	3.90601	3.89089	3.7591	3.88059	4.054	3.89463	3.91698	4.28481	3.94822	3.79406	3.91414	3.9095	3.89357	3.88085	3.91522	4.06882	4.12941	3.87721	3.8126	3.86758	3.91438	3.88677	3.83863	3.89247	3.89597	3.90525	3.92206	4.32678	3.88255	3.9527	4.1883	4.00775	3.90792	3.89698	4.29256
MIA2	4.83256	4.66703	4.83581	5.42507	4.78522	4.68463	4.57083	5.1851	5.2528	4.67816	4.38863	4.86465	4.80155	4.5579	5.54221	4.85552	5.14564	5.058	4.58436	4.69119	4.59874	4.97204	4.37897	5.0651	4.52309	5.25932	4.58869	5.5812	4.79242	4.31025	4.72944	4.94448	5.46375	4.66539	4.99994	5.58014	5.46106	4.85763	4.84122	4.73904	5.72681	4.74496	5.11403	5.0134	4.48498	4.7891	5.40462	5.1427	5.39297
MIA3	7.61908	6.58763	6.65348	7.51338	7.24379	6.7093	7.07559	6.74185	6.43745	6.54452	6.07143	7.05689	6.48	6.78931	7.5735	6.78966	6.68977	6.93712	6.4477	7.91647	6.78894	6.94269	6.39453	6.85649	7.14079	6.72195	6.62163	6.22124	6.82095	6.22539	7.00832	6.85192	6.39143	6.57475	6.1875	6.40436	7.5042	6.60515	6.7494	7.05932	7.05304	6.57	7.03195	7.2906	6.79	6.89787	6.89639	7.01271	7.61213
MLEC	8.77828	8.61877	8.47965	9.24775	9.06014	7.74055	7.05737	8.23202	8.02583	8.31027	8.38488	8.09959	8.02447	8.28555	9.07009	8.37634	8.53027	8.50501	8.19656	7.96814	8.21568	8.2761	8.69597	8.37803	8.65335	8.87503	8.22464	8.25607	8.47348	8.82265	8.37894	8.40826	8.37143	8.22544	8.17439	8.7503	9.11326	8.78967	8.62455	7.8213	9.22778	8.28555	8.90792	8.77252	8.60814	8.4074	8.76025	8.03735	9.41797
MOGS	7.22959	6.64119	6.35628	6.64412	7.33386	6.66064	7.01194	6.43418	6.04889	6.40586	6.41622	6.80065	6.66233	7.12443	6.25136	6.20514	6.72619	6.55747	6.31547	5.94059	6.9005	6.83082	7.5459	6.81738	6.57342	7.10045	6.63232	6.46871	6.87818	7.16197	6.16631	5.98384	6.76424	6.57547	6.59741	6.7632	6.35196	6.72582	6.71031	6.13336	7.34582	6.09004	7.1421	6.74976	6.50724	6.55941	7.24337	6.4108	6.95393
MPDU1	5.53988	5.09748	5.61675	5.48836	5.81222	5.32448	5.45712	5.23428	5.60232	5.15754	5.46925	5.1346	5.05883	5.38102	6.14517	5.23428	5.13383	5.52046	5.14642	5.37949	5.35235	5.42167	5.31331	5.51627	5.15426	5.23688	5.28278	5.22399	5.50397	5.14755	5.83579	5.30142	5.35235	5.32652	5.32109	5.24011	5.61451	5.41875	5.52886	5.22448	5.94	5.12145	5.89481	5.72549	5.30511	5.14889	4.93255	5.24165	5.85798
MPI	4.89794	4.791	4.94348	4.99008	4.98039	4.84036	5.85409	4.83634	4.85523	4.99723	4.97411	4.58075	4.50608	4.96063	4.75296	4.45536	5.06697	4.64406	5.25532	4.69482	4.88227	5.07394	5.1401	4.73355	4.7069	4.83634	4.69647	4.01973	5.01994	5.32189	4.87844	4.51053	4.82789	4.77414	4.99624	4.68861	5.29315	5.33578	4.68976	5.07986	5.70291	4.71527	5.46477	4.76814	5.31946	4.81435	4.42492	4.78222	5.01969
MT3	4.74334	4.88794	4.90129	4.94555	4.90633	4.99909	4.97363	4.6472	4.89036	4.78967	4.83473	4.89663	4.91307	5.12032	5.0691	4.83838	5.46665	4.9139	4.50831	4.86807	4.76093	4.77675	4.55509	5.14539	4.93915	5.93722	4.8118	6.43047	4.87525	4.85611	5.10333	4.81435	4.86323	5.63721	5.30829	5.43708	5.25671	5.92577	5.00344	5.12786	5.01651	4.90969	5.8627	5.47111	4.85004	4.91717	6.41108	5.02717	5.6652
MTTP	4.16894	6.67766	2.79225	2.7894	7.62249	2.79275	2.78104	2.83822	2.74122	2.73294	2.80129	2.76354	3.60663	2.80832	2.79869	2.7892	2.75821	2.7448	2.79646	2.82738	2.85201	2.73619	2.82094	6.31177	2.80021	2.71274	3.07908	2.7075	2.83141	2.79475	2.7828	6.65996	2.80934	2.76943	2.79693	2.75178	2.74008	2.7874	2.73814	2.8233	12.1601	2.81843	2.93045	2.88976	2.82382	2.7894	2.73788	2.76834	2.97899
MUC1	10.4004	9.97329	10.8716	9.02848	10.3606	10.2656	10.7135	6.90276	7.32188	9.04591	10.8404	9.42319	11.612	8.31504	4.66143	8.38818	10.6194	8.07653	8.62844	9.21938	9.02848	9.76761	8.89685	9.8765	11.0491	9.38698	7.7713	8.99456	9.9146	8.53775	9.36835	8.054	10.6	9.46677	10.3878	8.93997	9.19341	8.44018	6.81886	4.34593	3.9617	6.67831	8.21267	8.24936	5.40824	7.93418	7.72982	6.41203	8.67518
MUC12	3.59902	3.24334	3.30833	3.19777	3.67042	3.26588	3.83327	3.56933	3.23751	3.7511	3.6233	3.23959	3.51725	3.25807	3.25933	3.25122	3.41709	3.24833	3.28152	3.25499	3.28152	3.53798	3.27734	3.9683	3.32562	3.31815	3.95131	3.21195	3.25394	4.37759	3.42593	3.16739	3.32147	3.24527	3.49724	3.25706	3.2097	3.18898	3.26919	3.25034	3.63005	3.2752	3.18171	3.23323	3.24992	3.25181	3.17245	3.19859	3.19414
MUC13	8.34766	7.81142	7.52345	5.15553	10.2372	5.54591	10.4307	6.41014	7.45442	8.24329	6.44454	8.6684	7.57904	5.41628	7.16916	7.28261	8.13267	5.18656	6.52044	10.4385	8.13481	5.97247	8.30171	9.58836	6.9251	8.69931	8.00937	6.75591	8.05264	6.13307	6.58567	9.41262	8.17366	7.64621	7.46915	7.28975	5.94707	5.0205	5.34066	4.8909	10.9039	5.70742	3.73093	3.04965	5.39108	4.27785	5.10333	3.80078	4.12113
MUC15	3.80263	3.65806	3.14539	5.48517	3.51636	3.15287	3.1415	3.66811	3.15963	4.11515	3.98166	3.45992	3.15531	3.51281	3.64643	3.45479	3.09892	4.29597	4.13878	3.56558	4.11542	3.39284	3.44591	3.09385	3.14704	3.25954	3.50597	5.41253	3.54312	3.14023	3.173	3.93511	3.58342	3.26548	3.07385	4.21067	5.86186	6.75625	4.02839	3.21834	3.1087	3.89826	5.74717	6.00348	3.11896	5.19993	6.83217	5.57849	6.07749
MUC16	2.53062	9.64664	2.50063	2.66108	7.21277	5.06163	4.45878	4.53637	6.98577	5.46024	4.2623	4.21615	6.45255	5.03526	2.71945	2.77838	7.21849	8.41076	4.85907	2.57015	4.00511	7.05111	2.95177	5.26612	3.87108	4.40736	4.34315	2.6837	2.64919	4.91773	2.69708	2.72762	5.33604	3.05977	2.11055	2.32432	2.44789	2.6283	2.19855	2.74066	2.33777	2.76466	2.49819	2.24726	2.74871	5.29988	2.4408	2.48364	2.60291
MUC17	5.76878	4.28667	5.51434	3.9218	5.80502	5.86923	5.13624	4.52661	4.44835	5.08095	5.39322	6.14545	5.65649	3.86705	3.7349	3.61645	5.31408	3.74877	4.87141	3.56861	4.20726	4.16442	3.66889	6.99201	5.99578	6.77423	5.47997	5.71051	6.34346	6.17636	3.65902	5.36241	6.35726	6.87636	7.06547	4.95351	3.67235	3.93378	3.49585	3.94975	6.73942	3.63666	3.82924	4.25913	3.65806	3.40588	5.07205	3.61972	4.05057
MUC19	3.00081	2.98787	3.00233	2.92769	3.00391	3.0027	2.994	3.00777	2.98666	3.01123	2.99636	3.00823	2.99792	2.99418	2.98463	2.99792	3.00101	2.9891	2.98505	3.00353	3.03446	3.00901	3.02062	2.99771	3.00214	2.93697	2.97668	3.04009	2.9928	2.98525	3.05178	2.99955	2.99854	2.97777	3.00627	3.01348	2.93235	2.91971	3.20109	2.99418	3.00214	2.98746	3.07216	2.93045	2.96811	2.97215	2.9737	3.00466	2.85094
MUC2	3.51792	3.68893	3.60928	3.67285	7.71013	3.51463	3.93054	3.96722	3.48942	4.25755	3.48469	6.35252	3.58216	3.62069	3.48604	3.64317	3.50349	3.51064	3.53712	3.98561	3.4478	3.44475	3.48534	5.59279	3.61997	6.86634	4.12997	3.78809	3.50906	3.53027	3.55499	5.02425	5.24191	3.52939	3.585	3.54612	3.50327	3.60688	3.66188	3.58145	9.85754	3.46433	3.50349	3.51281	3.4284	3.48104	4.01039	3.47245	3.53048
MUC20	7.82308	8.44455	6.66904	6.49125	6.35067	6.36024	7.15691	5.0651	7.18257	6.10646	5.63914	7.26251	6.19723	3.7398	4.23643	8.17591	5.70122	5.74823	6.33371	6.07027	7.48183	6.74591	7.76856	6.95742	6.13648	7.87532	5.75131	6.84398	6.66971	6.5025	7.47712	6.33094	7.39025	6.06831	5.57987	5.50717	7.21097	5.28987	6.43359	3.82689	5.2945	5.04009	5.34305	5.62032	4.50831	6.04213	5.92959	5.54348	4.94555
MUC3A	3.60352	3.58074	3.58952	3.73595	3.72203	3.63711	3.69694	3.55594	3.59546	3.52485	3.6448	3.55347	3.54945	3.67329	3.56255	3.60758	3.57549	3.59525	3.57245	3.56461	3.43995	3.9401	3.55104	3.59338	3.60878	3.56861	3.58525	3.79406	3.7511	3.35225	3.58638	3.56338	3.67446	3.77767	3.84173	3.72997	3.61454	3.66545	3.71769	3.75657	3.6343	3.53007	4.16687	3.73022	3.64341	3.7018	4.11891	3.6312	3.94605
MUC4	4.01869	7.62572	3.80422	3.00333	5.30014	3.18671	7.18932	5.14067	5.04608	4.08375	5.33807	5.61451	5.0474	3.04049	3.01444	5.61425	6.02241	3.97394	4.61582	4.15175	5.4323	4.20703	5.52468	6.20546	4.17711	7.67973	5.82428	5.89321	5.12653	6.51516	3.25606	3.59151	5.78591	5.54433	4.67545	3.11621	3.19898	3.24992	3.06115	3.09671	3.14275	2.99101	3.29022	2.92683	3.5053	3.96914	3.49452	3.17521	3.09361
MUC5AC	9.22778	8.5294	6.73871	5.01857	12.0823	5.8973	7.46096	5.22964	5.60967	6.60681	9.09198	8.93469	5.13435	3.76684	3.29892	6.2205	7.74473	3.73931	3.96088	8.1469	5.60624	6.76532	3.31147	8.33802	3.34704	8.74502	7.43533	5.98132	5.85353	7.52345	3.60259	5.96991	6.5674	5.93237	7.88469	7.11175	3.84893	4.04467	3.01906	3.5786	3.79828	4.88601	3.46013	6.05946	3.20109	3.9063	4.43105	3.54827	4.85658
MUC5B	4.54722	5.1827	4.15143	5.17244	4.99513	5.40266	7.11432	4.65397	4.962	4.99269	6.53262	5.42734	2.82497	4.17906	2.93593	3.85745	7.0585	4.35325	5.15453	5.20135	5.8034	4.98676	4.27979	5.65463	6.56702	8.2532	5.31198	5.0406	5.88728	5.38672	5.85631	5.5417	5.13023	5.40192	4.09173	4.04915	5.86614	4.04546	3.93962	3.19156	3.06502	3.95684	4.63065	4.27808	3.05156	4.44997	4.43924	3.84947	3.92804
MUC6	6.47821	4.8776	4.37238	6.37425	5.97651	4.60158	7.74407	4.73904	4.14236	4.83284	7.1097	5.11706	4.48526	4.31247	4.37512	4.45338	6.04861	5.40692	4.69199	6.64412	5.79146	4.40905	3.88417	7.99942	4.8381	6.35472	4.99031	6.82023	5.02237	3.95321	5.86132	7.36404	4.9844	4.53212	4.83899	5.25671	7.08357	7.15621	4.28369	4.43866	4.43807	4.56182	6.20578	6.80026	4.21641	5.27588	5.84905	5.82399	5.69681
MUC7	2.83113	2.91097	2.82176	2.83843	2.84661	2.81616	2.81967	2.82859	2.83141	2.82609	2.86963	2.85051	2.81439	2.79945	2.83113	2.81417	2.83708	2.81712	2.83963	2.8307	2.86456	2.84909	2.85135	2.82476	2.81991	2.76685	2.81712	2.85001	2.83753	2.87129	2.80483	2.86292	2.89083	2.8406	2.83658	2.85538	2.93737	2.76043	2.8233	2.83984	2.84809	2.82203	2.98565	2.83282	2.83708	2.85115	2.87289	2.83615	2.83732
MUCL1	3.69171	3.53689	4.86924	3.48604	3.51191	3.45353	3.50778	3.51792	3.48604	3.49404	3.63479	3.49027	3.47402	3.45566	3.51571	3.52578	3.50888	3.50124	3.47068	3.50303	3.52578	3.46175	3.46132	3.50906	3.46659	3.52438	3.46659	3.46961	3.52294	3.52648	3.47531	3.455	3.46085	3.89647	3.48671	3.4819	3.47912	3.49607	3.45678	3.5404	3.50016	3.48919	3.43906	3.44652	3.47441	3.48895	3.49168	3.71541	3.52092
MVD	4.6673	4.73355	4.60331	4.65946	4.62611	5.01211	6.48	4.27892	5.05635	4.60546	6.26741	4.64266	4.61324	5.65354	4.81264	4.66593	4.62611	4.57758	4.48925	4.48752	4.85611	5.34414	4.6789	4.65836	4.51025	4.95087	4.63797	4.29048	5.92765	5.06373	4.93741	5.28173	4.62952	5.79976	5.47168	4.58463	4.56463	4.57188	4.74908	4.55986	4.90913	4.64746	4.68086	4.69226	4.72998	4.87303	4.41015	4.32651	5.92434
MYO1D	5.31033	4.99407	5.34642	5.07419	5.21867	6.46465	5.41848	5.09795	4.6825	4.71177	5.4878	5.09388	5.23045	4.59961	4.23698	5.06014	5.34282	4.99965	4.92267	5.00532	5.44644	5.67101	5.4827	5.69981	6.05326	5.94877	5.56091	5.75283	5.39348	5.25671	5.08066	4.88904	5.19129	5.52046	5.82804	5.33704	4.91284	4.27567	5.63535	4.52055	5.51836	4.36427	4.63707	4.77414	4.78686	5.32391	5.39838	5.4038	5.55954
MYOC	4.39946	4.40845	4.24817	4.29738	4.43495	4.41015	4.7894	4.29126	4.38692	4.33417	4.28127	4.31738	4.38032	4.44723	4.51382	4.40512	4.46067	4.43495	4.3992	4.36796	4.37372	4.35177	4.53183	4.41802	4.43377	5.31798	4.37702	5.35101	4.41292	4.43495	4.41159	4.32902	4.40736	5.30907	4.37066	4.56666	4.42767	6.45058	4.50582	4.56041	6.40617	4.30495	6.72406	4.4419	4.51109	4.42854	5.64155	4.41881	4.68861
NAGK	8.71326	9.00119	9.02113	8.76255	8.93096	8.64357	8.90913	9.3059	9.58418	9.53543	9.50828	8.91777	9.40533	8.75161	9.23126	9.13024	9.05163	9.5164	9.46467	9.25101	8.92245	9.15597	9.6421	9.07735	8.91518	8.1539	9.29303	7.73461	9.15886	8.59173	8.62749	9.07284	8.80205	9.00668	8.88321	8.76786	8.73928	8.33264	9.6396	8.91163	8.18687	9.80248	8.45649	8.38984	9.30411	9.29786	8.54877	8.95169	8.31027
NANP	6.26829	6.4938	6.5724	6.40799	7.05689	6.52576	6.85452	6.66552	6.58795	6.82931	6.73976	6.79768	6.73659	7.07936	7.02789	6.74042	6.68285	6.47821	6.76355	6.53614	5.9872	6.28838	6.46435	6.76674	5.92086	6.31363	6.18872	5.65649	6.2031	6.99087	6.32403	7.10644	6.81921	6.48492	6.45646	5.8924	6.13737	6.04404	6.90848	6.66592	6.44584	6.71132	5.62541	4.81036	6.71759	6.50697	5.64648	6.39692	5.7102
NANS	6.19023	6.04653	6.21932	6.47478	6.54077	6.04024	6.59617	5.73999	6.00788	5.85661	5.96516	5.92742	5.83027	5.75252	6.20138	5.99066	5.90504	5.84933	5.74226	6.1596	5.80428	5.98384	5.80674	6.33184	5.75496	6.62094	6.04569	6.17189	6.02241	5.79036	6.11564	6.15682	6.21518	5.88405	5.87982	5.83358	6.32341	6.19416	5.88293	5.78755	6.04375	5.92487	6.4179	6.22929	5.53988	5.48186	6.18691	5.81087	6.17757
NAPA	7.30409	7.97597	7.45875	7.65773	7.46473	7.42602	6.52697	7.63231	7.83444	7.73092	7.67314	7.80608	7.33934	7.08808	7.67973	7.51338	7.53269	7.67492	7.73092	6.95129	8.50773	7.58492	7.87878	7.97464	8.61299	8.11967	8.2516	8.70791	8.13691	7.65499	8.72841	6.93142	8.17591	7.80128	8.19864	7.65985	7.71809	7.49452	7.6853	7.27528	7.56713	7.35812	7.73988	7.43879	7.84905	7.93218	8.17877	8.06794	8.27139
NAPB	6.06286	5.8571	5.55747	5.60362	5.39684	5.65436	5.44028	6.55557	5.54247	5.37269	5.39502	5.92309	5.60992	5.94985	5.59657	6.01156	5.94593	5.85988	6.59163	5.62277	5.55747	5.35361	5.47358	5.57687	5.57877	6.93968	5.44081	5.84962	5.59329	5.52156	5.61293	5.7362	5.92005	5.12196	5.80479	5.08893	5.95016	5.74744	5.8754	5.699	5.40543	5.99523	5.52046	5.84412	5.95016	5.7992	4.78715	5.57798	4.47237
NAPG	7.3585	6.87332	6.65792	6.45093	7.53838	6.83634	6.80277	6.69464	6.35566	6.16541	7.27726	6.78071	7.02677	6.12097	5.98156	5.95293	5.97105	6.34929	6.48	6.83082	6.26979	6.7907	6.28074	6.83634	6.71132	7.2526	5.98018	6.69357	6.13282	6.39213	7.78992	6.68453	5.94736	7.12102	6.49807	5.91361	6.10557	6.04024	6.51389	5.83801	6.32692	5.83196	6.04889	6.06515	6.20367	6.0623	5.71225	6.06458	5.76709
NAT8L	4.5925	4.75399	4.5094	4.90425	4.27094	4.32651	4.78145	4.59657	4.8287	4.68861	4.50753	4.37208	4.60546	4.51025	4.44473	4.38663	4.40874	4.42793	4.5627	4.42492	4.55283	4.89747	4.47682	4.57188	4.52362	4.45425	4.57083	5.5782	4.65809	4.55651	4.76346	4.4986	4.60762	4.49349	4.52766	4.66456	5.38672	5.05856	4.7801	4.69671	4.48382	5.21998	5.4307	5.16046	4.79491	4.94646	4.92267	5.1537	5.40663
NCAN	2.92344	2.87152	2.82585	2.82585	2.87129	2.83047	2.85495	2.85708	2.85001	2.85411	2.84218	2.84784	2.84831	2.94525	2.86115	2.81348	2.84831	2.81463	2.85201	2.84125	3.18671	2.84218	2.84081	2.87732	2.84081	2.78617	2.83472	2.82585	2.81712	2.83334	2.82883	2.90315	3.18151	2.82563	2.85313	2.82979	2.75704	2.9334	2.94746	2.84592	2.81538	2.78179	2.8137	2.77093	2.81561	2.78617	2.75488	2.84951	2.84378
NCF1	5.35463	5.65194	5.84464	4.70719	5.47833	5.19454	5.05038	5.39707	5.72257	6.63919	6.35137	5.30116	7.33844	6.12566	3.83305	5.48545	6.00668	5.65968	6.8975	6.21143	6.43655	5.73322	6.27123	5.14218	5.86018	6.56007	6.16256	5.12223	7.00277	6.49515	4.75591	5.52445	5.46717	5.59821	5.57513	4.51767	4.73705	4.32	5.86752	6.57579	5.77074	6.2372	3.55259	4.54032	6.83217	6.16778	4.05111	5.86358	3.59546
NEU1	6.89827	7.26167	6.6825	8.49327	7.40322	8.12304	6.4089	7.89501	7.35715	7.6511	7.97464	7.42114	8.06469	6.97603	7.95596	6.2263	7.65661	7.74121	8.04539	7.57305	8.07653	7.6908	8.54661	7.24863	7.57247	6.96093	8.09103	7.84464	7.63231	7.85357	10.1728	7.95975	7.78038	7.38823	8.02915	8.08474	8.01854	7.97331	8.0513	7.24423	7.92973	7.43579	8.3609	7.83574	7.83385	7.88767	7.83325	8.03314	8.61398
NEU2	3.73686	3.63355	3.73567	3.63836	3.73638	3.85325	3.67645	3.70756	3.98433	3.76559	3.71693	3.73957	3.93591	4.06854	3.72176	3.75158	3.74461	3.61598	3.49542	3.73781	3.62628	3.66836	3.7511	3.73833	3.75517	3.64573	3.66788	3.56388	3.87857	3.75859	3.74853	3.68234	3.62441	3.67192	3.7349	3.72476	3.70379	3.63858	3.75932	4.03866	3.86997	3.75034	3.59078	3.6709	3.79379	3.77844	3.44949	3.72149	4.02547
NEU3	4.42492	4.32172	4.3179	4.4659	4.36625	4.54289	4.38224	4.34019	4.33832	4.31539	4.46562	4.34649	4.54171	4.75073	4.83367	4.47971	4.46982	4.38224	4.47856	4.47012	4.52554	4.34344	4.26023	4.20597	4.36038	4.52416	4.39495	4.34787	4.52496	4.45567	4.65344	4.27948	4.38032	4.42767	4.48526	4.28454	4.55364	4.78171	4.54546	4.40845	4.47633	4.76814	4.49892	4.46533	4.64604	4.4847	4.34315	4.35411	4.82606
NEU4	5.28935	5.12678	5.17408	5.25852	5.14805	5.22084	5.21681	4.93741	5.01264	4.95404	4.96875	5.0651	4.97987	5.07986	5.15808	5.10504	5.12145	5.18376	4.90719	5.21303	5.07122	5.14696	5.04477	5.3693	5.09606	5.39502	5.31303	5.33204	5.10048	5.36569	5.32391	5.19862	5.52318	5.27405	5.42424	5.21303	5.30699	5.4427	5.48488	5.39427	6.64119	5.46455	6.50493	6.27182	5.21364	5.45145	5.77051	5.29734	6.11292
NGLY1	6.7137	6.36688	6.66096	6.59055	6.82715	7.25127	6.81302	6.82095	6.41229	6.5254	6.85305	7.0233	6.75906	7.57041	6.76111	6.75434	7.21801	6.39112	6.87673	6.74012	6.32874	6.23838	6.29773	6.33032	6.9393	7.48129	6.1646	5.98527	6.68716	6.94192	7.34952	6.61931	6.75044	6.34961	6.62783	6.40252	6.96183	7.13305	6.69078	7.09813	6.66904	6.81377	7.12814	7.00427	6.80065	6.38768	5.88697	6.43112	6.86634
NOTCH1	5.67262	5.46427	5.80236	6.05973	5.67919	5.63226	5.60039	5.80149	5.54097	5.34171	5.93095	5.48488	5.72549	5.54247	6.32212	5.8314	5.62119	5.71359	5.73646	5.73133	5.68429	5.72229	5.78809	5.52545	5.70431	5.74717	5.74692	5.57136	5.53041	5.87839	6.25384	5.39684	5.48621	5.67101	5.66714	5.77231	6.02958	6.29333	5.91595	5.89185	5.47559	5.76211	6.22842	6.25325	5.66186	5.68405	5.89918	5.79507	6.67664
NOTCH2	7.63455	7.57462	7.68427	8.03525	7.06547	7.57462	6.96475	7.65711	8.07215	7.47016	7.5741	7.55427	7.6786	7.78668	7.32548	7.53064	7.70299	8.16178	7.69806	7.73092	7.90501	7.86706	7.97597	7.44908	7.61743	7.3706	8.04675	8.24483	7.91082	7.79287	7.69913	8.2224	8.26108	7.93283	7.6078	7.87394	8.18339	7.85223	8.5778	7.77297	6.59406	8.14831	7.53886	7.95596	7.91407	8.2659	8.14831	8.24483	7.25774
NOTCH3	6.1851	6.155	6.58378	5.77567	5.59849	6.70718	6.04183	6.59977	6.03085	5.93973	6.33942	5.84603	6.35662	5.05561	5.55418	6.10002	6.1761	6.24071	6.31273	5.54097	6.41451	6.90465	6.39749	6.07256	6.34809	5.87953	6.46619	6.058	6.32593	6.58224	6.92103	5.52468	5.82919	6.38859	6.1481	6.41108	5.89616	5.97134	6.81342	6.20821	5.01994	6.04516	5.60732	6.03432	6.22714	6.47542	6.10586	6.64631	5.73949
NOTCH4	5.03014	5.34615	5.59013	6.22539	4.65081	5.36027	5.08012	5.56562	5.12942	5.07583	5.18323	5.2133	5.22138	4.79984	4.90396	5.12059	5.28147	5.30881	5.40903	5.01187	5.15313	5.24992	5.64182	4.94838	5.53618	5.2067	5.35492	5.67294	5.05827	5.52576	5.35895	4.70356	5.05827	4.94054	4.99828	5.2348	5.29424	5.20982	5.42764	5.35738	5.08174	5.37372	5.71359	5.61159	5.39026	5.32162	5.95041	5.55875	5.85521
NPL	5.7373	5.81835	4.72972	5.49995	5.41173	5.46427	5.11978	5.66771	6.396	6.22658	6.58831	5.96307	6.695	6.4938	5.73133	5.35871	6.10701	6.59163	6.45387	7.06625	6.21291	6.11535	6.40315	5.38125	5.65381	6.46999	6.22989	5.24269	6.52338	5.54973	5.32448	6.50493	5.83274	6.37926	5.49662	5.37505	6.14282	4.81435	6.59805	6.56806	4.71584	7.04683	4.53011	5.31488	6.5424	6.19494	5.31946	5.82223	4.41998
NSF	4.85278	5.19587	5.30748	5.25724	4.37729	4.10822	4.75266	4.46443	4.60731	4.76985	4.44612	4.54834	4.38307	5.09581	5.09967	4.81403	4.71475	5.22964	4.55014	4.19215	4.11069	4.24987	4.29019	4.74215	5.07122	4.13108	4.45989	4.7333	4.47824	4.42492	3.91438	4.80595	5.11003	4.82576	5.16883	5.45435	5.35977	5.8369	4.31709	4.15423	4.97683	5.23195	5.20534	5.4147	4.44554	4.1551	5.79394	4.47515	5.30907
NUCB1	7.62625	8.00739	7.32818	7.8709	7.6025	7.92225	7.11765	7.93549	7.50324	7.96218	7.63282	7.63508	7.76739	7.88586	7.40709	7.2326	7.62249	7.8213	7.91462	6.86117	8.59173	8.29682	8.29833	8.39641	8.30328	8.15539	8.73822	8.04938	8.2516	8.50047	8.92502	6.57276	7.90433	8.37719	8.13622	8.55167	7.93941	7.35437	7.94849	7.72921	8.16307	7.47358	7.98989	7.46674	8.51311	8.5838	8.02786	8.2261	8.39378
NUDT14	4.84817	4.53812	4.38863	5.02533	4.55201	5.0715	4.70855	4.56153	4.46898	4.72507	4.44277	4.19192	4.69449	4.26928	4.67127	4.73987	4.5293	4.35094	4.66456	4.67758	4.57451	4.56013	4.38953	4.61187	4.50779	4.76232	4.37592	4.47122	5.15704	4.58183	6.03432	4.22121	4.78548	4.51999	4.31188	4.91526	5.15553	4.69034	4.57365	4.1225	4.59221	4.60598	4.70208	4.35783	4.60184	4.59986	4.67628	4.53095	5.23224
NUS1	6.73409	6.6901	5.93722	7.22286	6.88606	7.07395	6.63683	6.58122	7.16951	7.20787	7.28031	6.84833	6.87712	6.64869	7.07435	6.31428	6.59709	7.12897	6.78674	7.4911	6.97331	7.14983	7.35984	7.11723	6.47905	7.51072	7.12983	7.23134	7.15942	6.59199	6.34005	7.27314	7.20488	7.42211	7.08939	7.42259	7.14079	6.97403	7.10381	6.86598	7.10837	6.45677	7.35076	7.25989	6.92331	7.11723	7.56549	6.85231	7.40709
OGA	6.83634	7.11013	6.64695	6.72972	6.82752	6.71941	6.10979	6.84544	7.40523	6.75121	7.00468	7.17864	6.97169	6.80971	7.16791	7.0968	7.08102	7.0035	7.12566	7.21977	7.41835	7.37154	7.05603	6.59581	6.95549	7.25352	6.90696	6.67397	6.6246	7.18562	7.1541	7.29809	7.20316	6.63301	7.31343	6.80356	6.70861	6.61469	6.99444	6.61165	6.49674	6.87853	7.51473	6.90393	7.35076	7.35301	7.11892	6.64562	6.55363
OGN	5.30536	5.80837	6.24979	7.37517	6.44075	4.28754	6.60249	8.66478	6.03582	7.16584	6.70323	7.82542	7.37469	5.05135	5.14167	6.61501	4.9506	7.89306	8.13121	7.35715	9.53162	6.70897	7.78443	6.74976	8.10232	3.44363	8.82901	6.66336	7.5429	7.35172	4.57533	9.79962	8.10854	4.95246	6.58224	8.77592	7.34952	8.6102	7.17106	10.9559	8.29752	8.1114	8.30408	8.26015	10.0982	9.6396	9.6421	9.85754	5.24402
OGT	6.99805	6.91531	6.91687	7.63797	7.09217	6.65548	6.66936	7.3375	7.41327	6.66791	6.90658	6.98845	7.55926	7.69865	7.4786	7.32632	7.05265	7.32728	7.13867	7.28261	7.58386	7.33474	6.84793	7.28891	7.08435	7.65268	6.89306	7.26869	6.78424	7.08642	7.038	7.20407	7.09854	7.14647	7.10512	7.18132	7.58386	7.53113	7.18257	7.32772	6.82304	7.17864	7.86778	7.80608	7.6709	7.62738	7.8733	7.11978	7.32145
OMD	4.0859	4.66202	3.78121	4.82712	3.30815	4.05111	6.8151	6.93785	5.74145	6.35692	5.70886	7.18562	4.7905	5.10559	3.676	5.44901	3.56134	6.77453	6.48624	7.08474	7.47206	6.43808	6.25042	3.95032	5.08413	3.808	7.52732	4.14981	6.00125	5.7819	5.24321	7.80007	5.98661	6.70718	4.9645	7.47814	3.95795	4.15833	6.23748	8.09428	4.23503	5.93868	5.35026	5.38414	7.36168	7.66438	5.65784	8.04875	2.92039
OS9	8.77252	8.94919	8.52384	9.76761	8.58888	8.67427	8.06326	8.84133	8.7088	8.65852	8.54564	8.75714	8.89064	9.48491	9.77998	8.60063	8.84849	9.34465	8.76149	8.41687	9.30753	9.33589	9.18857	8.77942	8.99316	9.07431	9.30411	9.66085	8.98908	8.90913	9.03565	8.29596	9.35406	9.04992	9.28977	10.483	9.44259	9.77998	9.17154	8.80716	8.76677	8.63759	10.4873	9.99121	9.13466	9.30753	10.2842	9.18698	10.8143
OST4	10.4125	10.0815	10.5558	10.2477	10.4959	10.3026	11.0758	9.83607	10.5173	10.5426	10.292	10.1464	10.5948	10.3254	9.97607	9.27566	10.1015	9.97607	10.0691	10.8081	10.166	10.4704	10.4004	10.0247	10.4047	10.1523	10.1626	9.17471	10.0851	10.9743	11.4321	10.6194	10.6335	9.72828	9.93806	9.98527	10.2699	9.87897	10.1523	10.2172	9.90292	10.1464	9.77998	9.88932	10.7034	10.1626	9.68395	10.2699	10.0591
OSTC	9.8765	9.85183	9.77998	10.4917	11.0288	10.4504	10.2301	10.0656	10.3464	10.8143	10.6476	10.2403	10.5558	10.6936	11.2249	9.10871	10.13	10.3763	10.1112	10.5813	10.3504	10.4385	10.288	10.1141	9.32549	10.1433	10.1558	9.98226	10.1894	10.2477	9.44476	10.6515	9.78732	11.0098	9.82268	10.4543	10.5468	10.1268	10.5264	10.3681	10.0247	9.5864	10.5644	10.509	10.6982	10.2301	10.7401	10.2103	10.5003
P2RX3	3.12162	2.78568	2.98027	2.94192	2.93737	2.94626	2.93045	2.97985	2.96973	2.97755	3.01103	2.97777	3.06785	2.94907	2.96657	2.87862	2.92874	2.96701	2.97668	2.93425	2.9842	3.24058	2.98965	3.00676	2.96267	2.93773	2.99119	2.95712	3.03153	3.00738	2.96994	2.9598	2.96267	2.96227	2.96495	2.95833	3.6312	3.16855	2.99499	2.98706	2.91204	2.93172	3.07343	2.97815	2.96575	2.97691	3.02675	2.96476	3.19071
PAPSS2	8.0661	7.60511	8.45253	9.01072	7.81259	7.85092	8.72173	9.21453	7.83574	8.65641	8.34695	8.45253	8.11205	8.01854	6.71656	8.48155	8.37395	8.60424	8.29364	8.49947	8.55067	8.17736	9.03427	7.88882	7.6489	7.50179	8.85539	9.15453	8.38734	7.80483	6.60749	8.75161	8.53513	8.23038	7.85427	8.5496	8.78758	9.341	8.99177	9.39419	8.74035	9.1182	8.99603	8.67755	9.53345	8.49327	8.7771	8.67755	8.56453
PCSK9	5.60758	5.60013	4.87059	4.90773	5.74823	5.75717	7.14342	5.06137	4.08559	5.10048	5.83552	4.93523	4.85004	8.68317	5.8139	5.469	5.1013	4.70579	3.99558	4.88516	4.3992	4.39522	4.12496	4.48101	4.57218	6.94006	4.31326	4.91909	5.7765	6.00264	5.7819	4.67519	4.57424	5.05561	4.83473	4.85253	4.32425	4.90913	4.72124	4.23124	3.84762	4.26288	5.1502	4.79783	4.38335	4.26288	5.0191	4.84288	5.87953
PDIA3	8.3127	8.49503	8.08008	8.5496	8.76786	8.40062	8.64227	8.47608	8.57318	8.536	8.2261	8.21487	7.94662	8.05195	8.60336	7.94726	7.78038	7.9649	7.81973	9.03565	7.76038	8.03246	8.32867	7.98465	7.82308	7.70732	7.66493	7.72803	7.96287	8.13121	8.13267	8.33726	8.00817	8.49947	8.07286	8.25607	8.49837	7.95406	7.82245	8.16453	8.49062	7.9211	7.94303	8.24567	7.97331	7.51876	7.81848	7.71529	8.47786
PGM1	9.1103	9.25101	9.27921	10.7235	9.51406	9.75559	9.79463	9.26941	9.14543	9.65819	10.1894	9.21453	9.19643	9.41436	9.73301	8.40488	10.0722	10.2992	9.78487	8.58704	9.35406	8.48346	8.92968	8.57124	9.22123	9.37553	9.43556	9.261	9.49112	9.09955	8.76677	9.58177	9.54371	9.3779	8.96198	9.87365	11.0421	10.166	9.98835	9.45662	9.9146	9.93246	10.2236	10.7755	9.48303	9.42319	9.81728	9.7129	10.5342
PGM3	6.98845	6.54858	6.07786	8.46558	7.29994	7.10764	7.18171	7.15986	7.05603	7.21544	7.75799	7.16791	6.85121	6.38672	8.28792	6.67501	6.47759	7.43533	7.13821	7.63231	6.80244	6.77286	7.6704	6.96233	6.78211	7.02602	6.91835	6.26268	7.05644	7.01741	6.92758	7.66919	5.8383	6.79327	6.19086	7.60409	8.2388	7.60885	7.3786	7.61108	6.68387	7.16064	8.4203	7.89709	7.24379	6.88298	7.56975	6.92869	8.83911
PGRMC1	9.29487	9.29303	9.24476	8.95705	9.69498	9.61312	10.0527	9.46862	9.29786	9.59549	9.30252	9.32038	9.58836	9.54937	9.9116	8.9387	9.39238	8.99177	8.98406	9.27262	9.13318	10.0247	9.22941	9.68929	9.15886	8.74938	9.23996	8.93352	8.86778	9.10109	9.13923	9.68133	9.67637	9.5375	9.90592	9.09073	9.19173	8.50229	9.18076	8.89685	10.2301	8.76357	8.6506	8.37228	9.13768	9.33935	8.9635	9.05886	8.04875
PI4KB	6.99047	6.9412	7.08513	6.87853	7.29344	6.88531	6.86913	7.13379	6.48459	6.95699	7.36688	7.05111	7.53782	7.33386	6.85452	6.79652	6.82378	7.00238	6.9791	6.45093	7.13906	7.64514	7.0773	6.99841	7.29858	6.94082	7.33257	6.87853	7.39733	6.99997	7.165	6.46465	6.7359	6.82304	6.54145	6.77138	6.70467	6.44643	7.0464	6.79179	6.94608	7.07476	7.01307	6.6796	7.34198	7.39583	7.19742	7.0484	6.63404
PKM	8.83804	9.29131	8.78294	6.71405	7.96422	9.00007	8.71096	8.22313	7.87272	8.32465	8.3127	8.15893	7.86465	8.19284	6.90238	8.18025	8.32308	7.63455	8.15539	7.57805	8.79301	9.55378	8.46098	8.28253	8.89442	9.94437	8.42992	8.97188	8.62844	9.62638	9.49679	6.80933	8.60336	8.97601	9.02848	8.61877	6.7547	6.54452	7.60567	7.16951	6.7757	7.57199	6.72195	6.32966	7.89501	8.11076	7.56874	7.32412	6.69566
PLCB4	6.86219	4.95246	7.12355	4.60275	4.95661	5.09282	5.81335	6.25686	4.25273	5.1459	4.95632	6.96233	5.28912	5.19886	3.31795	5.72403	5.65381	5.09474	5.06884	5.9246	5.10192	4.38059	5.37008	5.15123	6.34496	6.15893	5.1851	5.62996	5.02023	4.26133	4.52496	6.04243	5.44109	4.69449	5.54374	4.88574	4.19005	5.00532	5.23071	5.73322	5.03255	6.5674	4.7405	4.94318	5.43517	5.11003	3.65519	5.45736	3.37464
PLOD1	7.07559	7.62303	6.82642	7.25695	6.91531	8.25388	7.28071	7.68806	7.3664	7.60355	7.87206	7.14164	7.40844	8.31104	6.82752	6.95628	8.10508	7.55753	7.70849	6.9412	7.55427	7.74874	8.37068	7.5912	7.0484	8.02915	8.01777	7.24863	7.53422	8.62749	7.36217	6.86951	6.42397	8.53686	7.32007	7.24993	7.22244	6.19086	7.58902	7.42501	7.23733	6.82342	7.42554	6.34563	7.79359	7.57092	7.95714	7.30183	7.17914
PLOD2	7.67656	8.86644	7.37776	7.80781	8.12512	9.94752	9.14686	8.59275	8.52749	9.46677	9.83607	8.21054	9.42481	8.27139	8.72631	7.87033	9.02248	8.53513	8.47965	8.24042	7.81553	7.79705	9.43915	8.71096	7.99198	9.40336	8.07932	7.62031	8.32622	9.44259	8.60424	9.07735	7.57041	8.99876	8.01718	8.11416	7.72219	7.51622	9.05432	9.26775	8.2659	8.51585	7.2468	7.29766	8.87155	7.81088	7.76967	7.42554	7.17369
PLOD3	8.80956	8.62257	9.59549	8.05583	8.30869	8.9286	8.34379	8.71951	8.41241	8.42911	8.73483	8.50609	9.02248	8.16372	8.08751	8.39793	8.4878	8.25006	8.85793	6.8845	8.22966	8.71841	8.91518	9.31319	9.37979	8.14767	8.39793	7.86282	8.6102	10.7135	9.77998	7.09428	8.75479	8.86267	8.81801	8.11205	8.12714	7.64014	8.45075	7.66152	7.90234	8.26284	8.0626	7.63848	8.17295	8.10028	7.74647	7.79949	7.93998
PMM1	5.6159	5.88212	5.56647	6.47414	5.95861	5.95458	5.30564	6.3587	5.9524	5.69466	5.57214	5.73432	5.99723	5.38893	6.4461	5.96933	6.50939	6.22153	6.54145	5.412	5.8314	5.39136	6.32812	5.90982	6.08484	5.27378	5.9872	6.18427	6.00207	5.74823	6.50838	6.07256	5.93664	6.39143	5.21681	5.63617	6.60709	6.13251	6.03906	5.88891	7.22521	6.29739	7.27768	6.37485	6.03346	6.00207	6.41259	6.29248	6.74658
PMM2	7.73221	7.16282	8.04394	7.37109	8.51129	7.4786	8.91295	6.91189	6.90729	7.2468	8.00533	7.25554	7.23859	7.59071	7.01233	6.99997	7.0464	7.18132	7.15822	6.76961	6.80318	6.79918	7.49656	7.80547	7.15457	7.84399	6.86151	7.02083	7.48387	7.50324	7.10837	6.88188	6.85685	7.2415	7.48859	6.99444	7.22286	7.78612	6.89639	7.2159	7.87585	6.9412	7.76568	7.27173	7.05449	6.65485	6.86988	6.95313	7.62572
POFUT1	5.01678	4.8035	4.92018	5.06884	4.88904	4.76568	4.75531	4.79984	4.99649	4.79783	4.76318	4.75476	4.7877	5.17898	5.45412	4.62279	4.85846	4.66846	4.80457	4.75591	4.74821	4.79926	4.92731	4.8885	4.71703	5.05883	4.81493	5.01238	4.66479	4.87059	5.08174	4.94529	4.91197	4.85089	4.73166	4.80457	4.962	5.02237	4.86154	4.79491	5.09194	4.68891	5.48861	5.22831	5.08752	4.81987	5.31627	4.95139	5.30511
POFUT2	4.84371	4.84371	4.97231	4.90582	4.58019	5.10609	4.94318	4.65566	4.63036	4.80381	4.72759	4.70383	4.83284	5.01994	4.97768	4.73518	4.75476	4.70356	4.66118	4.72563	4.75531	4.86465	4.74077	4.75241	4.98552	5.0651	4.66033	4.78382	4.74161	4.85033	5.09854	4.71675	4.96175	4.81006	4.86695	4.98305	4.94134	5.03413	4.80762	4.80155	4.76538	4.80214	5.24456	4.87007	4.82545	4.77387	5.12702	4.91935	5.3299
POGLUT1	6.56904	6.78103	6.87673	6.75366	6.64733	6.66827	6.30274	6.99566	7.04763	6.72508	7.09087	6.70755	6.71759	7.27173	7.32728	7.36958	6.80675	6.87415	6.72012	7.81783	7.0332	6.81191	7.21058	6.54658	7.92347	6.46716	6.99566	5.89375	7.17152	7.06096	6.41949	6.68907	6.97524	6.99162	7.06305	7.14164	6.84247	7.34389	7.04724	7.31836	6.64014	7.27128	7.41556	7.64514	7.47503	6.95129	6.55186	6.95742	7.02677
POGLUT2	6.0788	5.76478	5.10634	4.88765	5.89455	6.88188	6.12679	7.20267	7.12775	6.78314	6.55087	6.58284	6.77106	6.72972	5.95718	5.70208	6.48987	6.8494	6.7969	6.77069	6.23142	6.18091	7.10512	6.49611	5.73974	5.75104	6.56073	4.71555	6.54858	5.99865	6.02559	7.10685	6.26556	7.048	6.07027	6.72302	5.09163	4.0778	7.17293	7.14604	5.08776	6.07786	3.36309	4.00481	7.16197	6.48137	4.71238	6.84867	3.38812
POGLUT3	7.02866	7.19564	7.71302	7.18003	7.03999	8.09428	7.82609	8.17366	7.83632	7.5776	7.5912	7.88706	7.95464	8.10297	6.11564	8.01442	7.71529	8.02308	7.45389	7.57856	7.99063	7.85561	8.07576	7.96618	6.99247	8.16106	8.1687	8.13121	7.8964	7.17152	7.40176	8.07653	7.61847	8.33659	7.50273	8.39712	7.55214	7.04071	8.19356	8.22966	6.75867	7.35122	7.19478	7.79825	8.38568	7.90893	7.70195	7.80664	7.02988
POMGNT1	4.48811	4.65516	4.83284	4.90719	5.00155	5.0293	4.76703	4.78686	4.5389	5.01593	4.61104	4.66649	4.68725	5.47944	4.9582	4.51157	4.89959	4.91022	4.87007	4.30553	4.68976	5.17408	5.13802	4.97902	5.40297	4.83751	5.01939	5.10075	5.09416	4.92703	5.29527	4.57909	5.1848	5.65004	5.03229	5.23556	5.17711	4.72147	4.84206	4.85033	5.14916	4.74302	5.01238	4.9599	4.8135	4.81208	4.97281	4.85172	5.06289
POMGNT2	6.04078	6.13648	5.8902	7.06219	6.59199	6.88868	6.28932	7.15162	5.74637	6.68977	6.56937	6.51736	6.22445	7.17369	6.22475	5.92434	6.73242	7.28167	6.77387	5.84766	6.69531	6.11684	6.35413	6.32245	5.94851	5.55134	7.10837	6.76961	6.43717	6.26858	6.1964	6.06772	6.76044	6.74844	6.24216	6.50429	7.15654	6.80822	6.97047	6.4571	6.08624	6.21291	7.09018	6.8126	6.97603	6.43474	7.0993	7.50627	7.37776
POMK	3.40672	3.75418	3.6621	3.50932	3.57271	3.56722	3.89673	3.85005	3.6607	3.51322	3.99798	3.60663	3.59683	4.28369	3.56815	3.65971	3.56933	3.49901	3.60779	3.37781	3.60308	3.58457	3.58457	3.56957	3.48354	3.61254	3.53027	3.48604	3.59173	3.62886	4.3443	3.46565	3.41234	3.53996	3.57961	3.62886	3.53753	3.48534	3.54874	3.70132	3.56158	3.44475	3.43139	3.26272	3.45418	3.37071	3.42639	3.52578	3.45397
POMT1	5.8369	5.51137	5.28518	6.01068	5.57987	5.18711	6.17545	5.96077	5.29011	5.74882	5.42632	5.39476	5.13023	5.44644	5.8391	5.90705	5.44877	5.88994	5.67533	5.58982	5.28331	5.12301	5.42033	5.19755	5.59657	3.97843	5.4427	4.55761	5.46925	5.24295	5.43182	5.41009	5.7417	4.24817	5.00903	5.35463	5.91983	5.56912	5.76452	6.15203	5.71309	6.05094	6.27985	6.38859	5.56752	5.64873	4.65031	5.36519	6.52927
POMT2	5.98277	5.96276	5.73646	6.19148	5.65492	5.64511	5.56241	5.92547	6.16226	5.46925	5.67919	5.48022	5.86726	5.67533	5.98661	6.01798	5.7294	5.39189	5.65623	5.54698	5.54833	5.94181	5.66051	5.614	5.72492	5.73974	5.79394	5.88834	5.70716	5.88834	5.59305	5.85217	5.57245	5.78368	5.44081	5.9872	6.07971	6.12625	6.13533	5.81953	5.48912	6.07749	6.07786	6.23525	5.80786	5.6359	5.81554	5.54698	6.42366
PPP6C	7.93998	7.8853	8.01442	8.79631	7.97919	7.29903	7.65268	7.80312	8.20009	7.92973	7.55601	7.5801	7.71137	6.98722	7.76511	8.06794	7.46429	8.04273	7.8919	8.18401	7.87585	7.9649	7.93743	7.69974	7.4339	7.18521	8.03881	8.0513	7.75683	7.72052	7.48957	8.08602	7.93941	7.33934	7.62675	8.14469	8.71445	8.48876	7.7475	8.12781	8.20823	8.18546	8.40488	8.42911	7.94303	8.06326	8.40152	8.18339	8.7818
PPP6R1	7.85223	8.07361	7.68918	5.94796	7.6334	7.74121	7.07239	8.17877	6.82828	7.66865	7.50375	7.45489	7.3757	7.04724	6.85767	7.17106	7.54635	7.14557	7.53676	6.56224	7.46963	7.60511	7.25608	7.77859	7.96681	8.29438	7.28773	7.38581	7.79112	7.94303	7.01825	6.54276	7.69421	7.34998	8.04342	6.41319	6.54758	6.81007	7.33519	6.84544	7.27813	6.96183	7.00749	6.27774	7.38527	7.36496	6.55747	7.04114	6.91984
PPP6R3	6.90202	7.34241	7.1356	7.15245	7.3526	7.49056	7.07896	7.25168	7.17152	6.9218	7.43533	7.18257	7.13342	7.29587	7.44167	7.85561	7.33386	7.34671	7.27909	7.48957	7.23303	7.36447	7.03645	7.41459	7.19348	7.43127	6.98383	7.03361	7.05603	7.17914	7.0968	7.4339	7.4412	7.30409	7.49205	7.04467	7.02083	6.91644	7.21933	6.93254	7.29858	7.16951	7.45875	7.65057	7.32998	7.41646	7.29587	7.19303	6.66653
PRDX4	10.3219	10.2583	9.99121	12.5637	10.8349	10.0781	11.0041	10.5763	10.5948	10.4344	10.4959	10.6194	9.92899	10.9927	11.4321	9.5864	10.0408	11.8422	10.9039	10.6194	10.5681	10.4504	10.6095	10.8716	9.98835	10.8303	10.9086	11.5434	10.3919	10.5813	10.7343	10.9086	9.76761	10.5813	9.93519	12.5428	12.3236	12.9407	10.8716	11.5112	9.87071	10.5216	13.0682	12.8593	10.9201	10.67	13.0454	11.4418	12.8804
PREB	7.23733	7.00427	7.0823	7.1026	7.38135	7.38581	7.65985	7.8213	7.04347	7.2638	7.86216	7.5052	7.54635	7.58492	7.19436	7.32592	7.3757	7.28351	7.60409	6.97447	7.52687	7.53216	7.60461	7.038	7.70411	7.60135	7.55649	6.65894	7.50473	7.62787	7.61797	6.78354	7.07641	7.39976	6.91687	7.04921	7.42114	6.96233	7.59479	7.33474	7.2949	7.16879	7.66814	7.58902	7.48668	7.36688	7.4042	7.59657	7.87937
PRELP	6.84754	6.9996	6.43808	6.89498	6.44228	8.76786	6.40675	9.23292	7.14298	7.82484	7.39583	8.46558	6.98146	5.49802	6.01267	7.25168	7.57041	7.55537	8.15682	7.4901	8.47165	8.34533	8.05264	6.02699	7.81142	6.9393	8.31898	7.08939	7.51725	7.35437	7.48572	8.07495	7.75057	7.86465	7.92038	8.2761	6.50027	6.45677	8.79066	7.77458	7.12313	7.09639	6.21581	6.34591	8.14044	8.6102	6.90354	9.40738	6.58663
PRKCSH	8.24567	8.00533	8.2045	8.77942	8.29913	8.37634	8.32548	8.00016	7.97919	8.01006	8.30003	7.69748	8.06727	8.1687	9.12562	8.50139	8.33726	8.22464	8.03382	7.55601	8.82472	8.80716	8.6335	8.9387	8.80956	9.00383	9.07146	8.80205	8.59975	9.07589	9.09338	6.98383	8.88208	8.75833	8.52839	8.93616	8.57233	8.46558	8.21267	7.59479	8.17952	7.92347	8.93352	8.47786	8.6684	8.64473	9.28269	8.42465	9.63069
PSEN1	5.18764	5.2575	5.30671	5.11891	5.70238	5.65813	5.27919	5.10048	5.09334	5.29212	5.20724	5.13572	5.46876	5.2112	4.96875	5.37635	5.49617	5.26091	5.06342	5.33885	5.10305	5.57459	5.37036	5.58903	5.45838	5.49382	5.32162	4.97496	5.34441	5.23245	4.91332	5.24812	5.3232	5.46532	5.55263	5.2125	5.02321	4.88904	5.10977	4.90074	5.74823	4.81154	5.27163	4.99965	5.05135	5.21708	4.8901	5.07099	5.16552
PSMC1	9.85995	9.90015	9.7129	9.87071	9.70774	9.78233	10.2001	9.83362	9.77024	10.1433	9.92899	9.53162	10.0851	10.1203	9.89442	10.314	10.1894	9.83833	9.92622	10.3254	9.60203	9.67179	9.70774	9.96759	10.0851	9.26941	9.85183	9.5164	9.77497	10.0408	9.06296	10.5386	9.36433	10.1046	9.59994	9.36835	9.79235	9.83607	9.90292	9.91742	9.61513	10.3026	9.50631	9.97329	9.55581	9.74837	9.25284	9.97034	9.22631
PTGDS	8.06051	8.37143	9.34465	9.01978	8.02113	7.97668	6.87636	10.6194	7.87585	9.54747	9.68653	10.3254	9.26617	6.61836	5.69	8.1114	7.76038	9.17787	9.09338	8.06326	11.9493	9.98835	9.54371	6.96018	9.21938	6.88049	11.1808	8.84976	10.2337	10.3606	8.04938	8.52659	10.4464	8.70684	9.32038	9.39238	8.77469	8.41516	9.81465	12.2808	8.33426	9.74586	9.02248	9.38874	12.9011	11.5877	10.3504	10.6046	7.90501
RAB14	7.19564	7.25989	7.08977	7.08398	7.22701	6.88011	6.9218	7.0614	7.34431	7.28403	6.74844	6.97447	7.03151	6.25413	6.3799	7.76283	6.78931	7.10837	7.14079	7.19086	7.05036	7.30883	7.07603	7.0993	6.76147	7.13867	7.18932	7.39025	7.0388	6.83293	7.01454	6.78674	7.12149	6.99997	7.18521	7.08149	7.12639	7.14164	7.19179	7.46387	7.13514	7.13188	6.83116	7.07395	7.12483	7.16669	6.92723	6.97011	6.63817
RAB1A	7.32592	7.27768	7.06795	7.45726	7.60725	7.23563	7.65329	7.18086	7.55267	7.33216	7.26425	7.3664	7.1699	7.13601	7.44952	7.24513	7.48488	7.32772	7.21544	7.63455	7.00669	7.37722	7.42114	7.5444	7.11723	7.60835	7.12566	7.49205	7.28261	7.04237	6.94269	7.62303	7.21277	7.6078	7.20062	7.30883	7.4657	7.52732	7.37008	7.4624	7.57092	7.24724	7.52497	7.66865	7.14126	7.17914	7.62139	7.2906	7.6621
RAB1B	8.19656	8.57233	7.98603	7.95264	7.98394	8.43083	7.83151	7.83515	7.79825	7.96618	8.26669	7.64676	7.98737	7.36496	7.13867	8.07141	8.1862	7.85163	7.87878	6.86634	7.85808	8.21487	8.27139	8.515	7.85029	8.72512	8.2045	8.42385	8.01718	8.20302	8.82156	6.94045	8.30259	8.49233	8.54175	8.14906	7.98096	7.97464	7.69483	7.55926	7.70903	7.72982	7.90294	8.15756	7.82909	7.70787	8.39224	7.90113	8.03186
RAD23B	7.98162	8.14323	7.9834	8.28555	8.18177	8.05913	8.30259	8.2532	8.32465	8.16802	8.12304	8.09179	8.29215	7.86905	9.46467	8.40233	7.84055	8.21414	8.13968	8.15682	7.93218	8.01063	7.93483	7.96094	7.53064	8.25841	7.93483	8.422	7.93149	7.79889	8.34616	8.06404	8.14906	7.77744	7.97855	8.22313	8.33659	8.84503	8.40912	8.36258	8.13121	8.34533	8.98268	8.47079	8.02113	8.00668	8.51417	7.79825	8.76149
RAMP1	6.75977	7.68308	6.20483	8.79406	6.92723	7.10728	8.06537	7.0496	7.51283	6.801	6.52727	7.26425	7.16108	6.43873	9.57971	7.13266	6.43621	7.20267	7.30137	6.26648	7.85286	7.71189	7.30635	7.93549	6.91572	6.9096	7.38423	7.61743	6.96747	6.62392	7.12566	7.11432	7.5042	5.66964	6.51766	8.16802	8.16372	9.65819	7.25127	6.83082	7.58114	6.73344	9.42159	8.5938	7.03027	7.26736	8.57233	7.74121	9.19823
RANGRF	6.61404	6.04054	6.29989	6.55427	6.58795	6.43323	5.25097	6.17122	6.50459	6.41144	6.16403	5.96566	6.26268	5.73864	6.74374	6.46716	5.62914	6.10953	6.40041	6.47478	6.10235	6.26797	6.33125	6.02088	6.18374	5.45064	6.24545	5.92547	6.28279	6.38926	7.31243	6.53882	6.38513	5.98579	6.24856	5.74584	5.84991	5.49434	6.58186	6.77997	6.6385	6.56038	5.63371	5.3146	6.32593	6.23394	4.96039	6.70718	5.00101
RENBP	3.92363	4.65374	4.21586	4.17633	4.30972	4.29624	3.61091	4.02244	4.54924	4.49126	4.52957	4.74709	4.99297	6.02423	4.59684	4.11261	4.63737	4.8818	4.52766	3.65928	5.44192	5.65246	4.89276	4.62254	4.36538	4.71088	4.97715	4.57365	5.17814	4.56893	7.82967	3.82689	4.97549	5.32132	4.98789	4.57136	3.61669	4.6469	4.60362	4.60906	4.69148	4.81064	4.65566	4.6546	4.67838	4.79926	4.70855	4.55364	4.40708
RFT1	4.65212	4.68059	4.38979	4.38808	4.6606	4.83118	4.61785	4.39379	4.75044	4.54171	4.49066	4.4835	4.62526	5.10532	4.74851	4.69389	4.7055	4.4618	4.54924	4.65862	4.41572	4.50366	4.49126	4.4802	4.35442	4.60158	4.44389	3.96252	4.51157	4.53864	5.13703	4.55393	4.41772	4.38953	4.49715	4.37592	4.86465	4.85933	4.59986	4.80541	4.61405	4.45456	4.66312	5.05908	4.6738	4.52496	4.22979	4.55283	4.6673
RNF103	8.42911	8.12512	8.40405	8.3319	8.38397	8.28168	8.441	8.02657	8.41516	8.19934	8.14906	8.52558	8.27688	7.54732	7.93418	8.84976	8.2516	8.24483	8.09771	8.21267	8.43599	8.5597	8.07215	8.76786	8.27528	8.36482	8.15973	8.12649	7.99575	8.03186	7.30359	8.2532	8.3641	8.40152	8.38222	8.19934	8.39224	8.01992	8.13691	8.0513	8.36009	8.13622	8.14401	8.3397	8.07141	8.30171	8.07361	8.25462	8.16654
RNF139	8.09505	8.71951	8.59086	8.34456	8.72961	8.35853	8.37963	8.43083	8.48079	8.50859	8.50047	8.3568	9.02535	10.4344	8.07785	9.079	8.17591	8.45253	8.57411	8.55651	8.27139	8.48507	8.03314	8.22464	8.20823	7.7036	8.77828	7.94992	8.2761	8.24329	7.542	8.54564	8.41516	8.1715	8.61877	8.53121	8.21054	8.69711	8.40152	8.30086	8.15254	8.91295	8.80414	8.70457	8.52194	8.22544	8.26908	8.69711	8.40912
RNF185	6.82642	6.94006	6.76044	6.71724	6.49711	7.08513	6.70215	6.54982	6.82342	6.70576	6.89379	6.78713	7.11561	7.22019	6.12594	6.48428	6.98233	6.96707	6.82894	6.60015	7.1765	6.70112	6.82268	6.71298	6.71902	7.1223	6.79951	6.92794	6.75226	6.95237	7.24724	6.44034	6.07998	7.22424	6.20636	6.36238	6.94536	6.31647	7.04921	6.71405	7.33257	6.70112	6.20337	5.83274	7.03235	6.7772	6.85413	7.05344	6.29584
RNF5	6.28443	6.066	5.79367	6.29276	5.98895	6.11069	5.81169	5.9649	6.44454	5.98842	6.00845	5.99578	5.90705	5.8198	6.91948	5.7417	6.27551	5.95579	6.03669	6.18292	6.1866	5.95776	6.27278	6.00554	6.16403	6.73379	6.1359	6.80026	6.0237	6.01659	6.33793	6.05771	6.1079	6.09286	6.16601	6.16951	6.19695	6.26947	6.04945	6.26524	6.58378	5.74121	6.15745	5.99212	5.83939	5.86812	6.39719	6.09729	6.6825
RP9	5.73133	5.60175	5.85021	5.38919	5.50314	7.04347	5.65162	5.96133	5.82428	5.41306	5.93269	5.63343	5.84573	6.12878	6.79613	5.99032	5.53345	5.65107	5.76136	5.76022	6.00585	5.66244	5.75207	5.82339	5.71858	5.8198	5.67475	5.78836	5.71309	6.07312	6.19668	5.61293	5.47751	5.75207	5.80922	5.37562	5.55524	5.90318	5.58793	5.7491	5.31488	5.85164	6.32086	5.80645	5.72403	5.70487	5.69735	5.78533	5.95776
RPL10	7.73033	7.65444	7.56289	7.81553	7.61847	7.61797	7.84586	7.7833	7.93149	7.58331	7.61481	7.72743	7.7892	7.87465	7.94726	7.8007	7.95049	7.80902	7.64949	7.73928	7.87693	7.93149	7.57092	7.57247	7.80724	7.90893	7.67706	8.03246	7.85918	7.68478	7.79705	7.56713	8.24788	7.80664	8.07576	8.16573	7.87751	8.50139	7.76399	8.17001	7.45489	7.97128	8.17591	8.19211	7.81425	7.85494	8.14615	7.92855	8.22544
RPL18	10.0442	9.39574	9.61091	9.44677	9.24476	9.5044	9.25609	9.02113	9.72294	9.12562	9.21453	9.35003	9.36623	9.28779	9.97034	9.54937	9.41262	9.30753	9.20649	9.258	9.06566	8.83704	8.79739	9.08666	9.31504	9.63295	8.97601	9.29949	9.04849	9.80957	9.34814	9.33935	9.28779	9.34465	9.62874	9.45662	9.46677	9.66284	9.16059	9.27566	9.10436	9.45662	9.77024	9.76558	9.26617	9.30411	9.65819	9.30753	9.63523
RPL27	13.7242	13.1318	13.6645	12.6483	13.4714	13.7866	13.5462	13.4249	13.5462	13.575	13.575	12.7759	13.7548	14.2027	12.838	13.6051	13.3813	12.838	13.2184	13.4035	13.0899	13.2184	13.694	13.694	13.6051	12.9011	13.0243	12.9812	13.3595	13.4714	13.4936	13.2687	12.9216	13.8192	13.6335	12.9407	12.6908	12.7953	13.2426	13.6051	13.1962	13.575	12.5637	12.6483	13.4484	13.1099	12.9812	13.0454	12.6908
RPL4	13.1318	12.9011	13.0243	13.0682	13.3813	13.4484	13.3813	13.3143	13.4936	13.3143	13.4936	12.838	13.0243	13.3143	13.7866	13.1318	13.0899	13.0899	13.1543	13.4484	13.1745	13.1099	13.6051	12.6683	13.6335	12.8185	12.9812	12.838	13.0454	13.8192	13.3595	13.3143	12.1784	13.1318	12.6908	12.6683	13.1099	13.0682	13.3366	13.5462	13.0682	13.6335	13.0899	13.1745	13.575	13.3366	13.0243	13.1745	13.0243
RPL6	12.9407	12.8593	12.9604	12.8593	13.4249	12.9216	12.5187	13.4936	13.3143	13.1543	13.0899	12.9812	13.2184	12.9011	14.0715	13.3366	13.1543	13.1099	12.9812	13.575	13.1962	12.7953	13.575	12.9812	13.3813	12.9812	13.0899	12.8804	13.3143	13.4035	13.6645	13.4714	13.2184	12.9407	13.2687	12.9604	12.8593	12.9604	13.4484	13.4484	13.2184	13.4714	12.9812	12.7953	13.6335	13.1543	13.1962	13.0682	12.9998
RPN1	6.08973	6.18181	6.15529	6.17424	6.11097	6.28013	6.43717	5.91041	6.41695	6.18872	6.19925	5.75936	5.91647	6.06428	6.45093	5.76211	6.03432	6.04078	5.89809	5.89105	5.68485	5.71474	6.03755	5.92221	6.04292	6.19234	5.84024	5.8725	5.91478	6.10466	6.05005	5.83358	5.9203	6.03259	6.0018	6.08739	6.07852	6.0877	6.094	6.12034	5.9451	5.93208	6.10354	5.83939	5.67294	5.60099	5.63138	5.62061	6.01464
RPN2	10.8611	10.9804	10.8825	10.6429	11.6579	11.4123	11.2021	10.8253	10.8935	10.9559	11.1434	10.914	11.0098	11.083	11.8422	10.7813	10.7813	10.6838	10.7974	11.1434	11.0758	10.7813	11.2401	11.083	11.3764	10.914	10.5723	10.4543	10.5813	10.6515	11.705	10.675	10.7558	10.9927	10.8143	10.5813	10.8498	10.2738	11.0225	11.0683	10.4272	10.6287	10.2172	10.5301	11.4509	10.6244	10.5723	10.3026	10.6287
RPS21	10.6244	9.97034	10.0217	10.675	10.3026	10.8716	11.1881	10.1433	10.7656	10.1464	9.89205	10.2172	9.85995	11.9951	10.9743	10.8876	10.5908	10.0691	10.3504	10.6381	10.0591	9.73572	9.75071	9.90015	10.6883	10.3962	9.83109	10.0883	9.44078	11.2696	10.9927	10.729	10.3399	9.58418	9.9146	10.2842	10.4621	10.8349	10.007	10.5216	9.94437	10.6647	10.7508	10.845	10.251	9.85183	9.94752	10.5813	10.9259
RPS23	10.0217	10.0914	10.2842	11.1434	9.54163	10.2403	9.58836	9.52485	10.9866	10.8876	10.2034	10.5173	10.0982	10.5386	11.166	10.2438	10.4236	10.9039	10.1894	10.314	10.5468	9.14236	10.66	10.1855	10.3504	10.6244	10.4579	10.6287	10.4917	10.4579	10.2773	10.3606	10.3962	10.3103	10.0722	10.4873	10.7089	9.72294	10.8349	10.6838	10.6883	10.5513	11.3671	11.0358	10.8081	9.75331	11.0557	10.6194	10.7974
RPS27A	7.49976	7.31532	7.14729	7.78992	7.64949	7.43082	7.59171	7.66865	7.71529	7.34631	7.29587	7.35984	7.31243	8.2224	8.12852	7.44354	7.4901	7.59276	7.35941	7.89373	7.42889	7.42841	7.88706	7.32007	7.63965	7.69421	7.36354	8.02915	7.49608	7.53939	7.87878	7.63903	7.96218	7.52791	7.31197	7.80128	7.86282	7.88706	7.31287	7.92855	7.66493	7.65329	7.61533	8.00533	7.52732	7.97065	8.30563	7.90501	8.11205
RPS28	8.2008	7.75567	8.20009	8.32208	8.18546	8.19284	8.22313	8.29055	8.08139	7.99511	7.74647	8.05264	7.84287	8.06051	8.83804	8.14469	8.1624	8.22395	8.0701	8.13192	8.03945	8.09238	7.86101	8.0626	8.11281	8.07141	7.98032	8.53513	7.93743	8.10369	8.89064	8.08474	8.27773	8.0661	8.00016	8.21487	8.20155	8.46462	8.25006	8.52194	8.39712	8.40992	8.64473	8.50773	8.28329	8.16453	8.2261	8.2532	8.57685
RPS29	9.35761	9.14686	9.02848	10.4047	9.62394	9.27262	8.67325	9.15453	10.4344	8.59681	9.01978	8.9387	9.19341	8.68952	10.4163	9.43232	9.15736	9.3094	9.29786	9.69753	9.3779	9.26454	8.67755	8.70791	8.76786	9.04591	8.86385	9.00668	9.07735	9.86769	8.88448	9.37979	9.73301	8.50609	8.97452	9.72059	10.2546	10.3919	9.49287	9.44078	9.35761	9.96759	9.98835	10.1626	9.25284	9.28977	9.76054	9.72828	10.6335
RXYLT1	6.508	6.27804	7.30137	7.20316	6.75044	6.34125	6.6246	7.24513	7.05344	6.93679	6.26797	6.58505	6.63543	8.13192	8.07141	6.10267	6.75434	7.34861	6.62094	7.15285	6.78596	6.85377	6.73379	6.75501	6.38605	6.07197	6.88264	6.81342	6.78931	6.75867	7.20012	6.95164	6.99687	6.83891	6.86883	7.07276	7.38135	6.88338	7.04886	7.542	6.49902	7.2634	6.85021	7.25086	7.05775	6.91644	6.78858	7.15691	7.24594
RYR1	3.39006	3.11896	3.14378	3.03968	4.04494	3.14642	3.32473	4.08924	3.14576	3.22786	3.60878	3.16125	3.17733	3.13628	3.10097	5.49327	3.159	3.11976	3.12998	3.14743	3.44146	3.4787	5.75021	3.11381	3.26757	3.01285	3.60452	3.09912	3.44208	5.67709	3.08538	3.1972	3.34076	3.13291	4.01818	3.13452	3.1394	3.08538	2.99214	3.1415	3.14435	3.33938	3.02378	3.08898	3.11119	3.18334	3.03232	3.22906	2.98066
RYR2	3.83598	4.00853	3.88168	6.20578	3.46565	3.65257	4.45536	3.67329	3.77382	3.50821	3.51301	3.82505	3.86005	4.91197	4.18438	4.39266	3.58478	4.77331	4.04995	3.86705	3.77258	3.67192	3.61764	3.70379	3.77335	4.08899	3.87697	3.97686	3.80263	3.3297	3.37949	3.84021	3.20129	3.99974	3.62678	5.22109	5.23071	5.90982	4.19271	4.6673	4.86521	3.70081	6.45255	6.67928	4.88821	3.85059	6.01605	5.17295	6.37025
RYR3	2.75321	2.74626	2.75563	2.73643	3.7068	2.74122	2.76301	2.75646	2.74871	2.7479	2.75592	2.74233	2.8307	2.74572	2.72702	2.74599	2.74122	2.78202	2.75851	2.74764	2.75646	2.74423	2.76043	2.91903	2.75488	2.75208	2.76943	2.73208	2.75208	2.77731	2.71556	2.75373	2.75927	2.75592	2.75646	2.75979	2.7213	2.72762	2.74983	3.86115	5.23273	3.08105	2.71527	2.71337	2.82689	3.1423	2.71274	2.72997	2.73868
S100A12	3.58592	4.10903	3.62192	3.73879	5.40903	3.49995	3.50482	4.06398	4.94674	4.8415	5.15677	4.55929	6.18206	3.4266	3.40398	3.48961	4.97363	3.73805	5.17898	5.60758	5.37165	4.48722	5.92058	4.97021	3.42154	4.89694	5.1313	3.70527	4.70356	4.07249	3.6882	5.99152	3.1972	3.64991	3.86676	3.7245	4.51433	7.45776	3.89489	5.47435	4.25701	5.27274	5.53405	4.51999	6.94575	3.32706	5.0205	4.28425	3.53729
S100B	3.89721	3.36161	4.10768	3.27411	3.21564	2.93045	2.67781	4.45904	3.15672	4.43241	4.01421	3.78657	3.83495	2.56403	3.23175	3.99104	4.01768	3.85084	4.24786	3.24938	4.65056	4.48526	3.33738	3.21295	4.32425	3.11836	4.45626	4.45248	3.97584	3.92916	3.64966	3.8917	3.72203	3.85433	3.39179	3.60186	3.07285	4.24651	4.28257	4.97045	4.62503	4.66785	3.27434	3.40162	4.79597	4.88227	3.15066	4.15065	3.14081
SAR1B	6.80782	7.01342	6.55124	7.11601	7.42554	6.62562	7.27768	6.88531	7.43034	6.88298	6.68831	6.91611	6.75835	7.19742	6.97837	6.23925	6.98845	6.7452	6.74221	7.38729	6.60113	6.89008	6.50909	7.07357	6.74907	6.84504	6.68752	6.58994	6.39213	6.59512	5.9751	7.34431	7.11978	6.94421	6.53551	6.83992	7.02206	7.14037	6.87372	6.91427	8.71216	6.64347	7.37776	6.76289	6.55523	6.5767	7.11299	6.73174	7.54102
SBSPON	3.9257	3.87587	4.4425	3.88446	3.9455	3.52894	3.88059	4.44503	3.44146	3.69523	5.12032	3.49787	3.74512	3.88829	3.70449	3.63261	3.51973	4.29435	4.02947	4.47945	4.19402	3.67065	3.9683	3.8126	4.66005	3.798	4.3828	5.36413	3.76834	3.43884	4.51215	3.7951	3.88168	4.55232	3.74905	4.23155	3.51484	4.24682	4.84428	5.80265	4.20296	4.71177	4.02679	3.95684	4.42056	4.40455	3.96914	5.81303	3.54712
SCFD1	6.59546	6.54489	6.75192	6.8845	6.69531	7.08642	6.94192	6.64631	6.90427	6.46214	6.61017	6.57805	6.83992	6.84289	7.06955	7.03717	6.69392	6.6997	6.40924	6.83447	6.40645	6.49311	6.11564	6.55973	6.40954	7.1699	6.2584	7.05775	6.41203	6.48366	5.84962	6.61017	6.29248	6.95203	6.21518	6.51801	6.89538	7.09558	6.87493	6.74875	6.4108	6.96747	6.91152	6.98418	6.51485	6.2205	7.16411	6.65894	6.78103
SCGB1A1	3.13291	2.93815	3.1122	3.05418	3.12978	3.17226	3.11877	3.12978	3.11498	3.08916	3.12936	3.12632	3.27194	3.07908	3.10911	3.23727	3.02736	3.01227	3.12283	3.08188	3.13745	3.12426	3.14023	3.13033	3.13841	3.25688	3.15047	3.05285	3.0868	3.1501	3.10997	3.13609	3.11639	3.1087	3.36593	3.10256	3.0365	3.21077	3.0874	3.10135	3.10539	3.03287	2.98132	3.04253	3.11796	3.04567	3.34291	3.05595	3.00428
SDC1	8.81698	8.95041	8.89555	6.97566	8.54175	9.01318	9.83607	8.26015	8.40488	8.74035	9.90592	8.68098	8.67633	9.15736	7.85685	7.85286	9.28095	8.83133	8.82901	8.57978	7.52394	8.87716	9.09627	8.97741	8.68098	9.43722	8.49592	8.54262	8.79631	9.60417	8.66943	7.97464	9.30411	9.76054	8.97188	9.341	7.07	6.25933	7.89569	6.59617	7.93549	6.31706	5.81416	6.58186	6.47602	7.75799	5.64765	7.36261	5.42424
SDC2	6.62666	6.98687	5.75021	8.4283	7.15457	7.63455	7.2526	8.05526	8.60814	8.17366	7.43879	7.61162	7.69134	6.17222	8.70999	6.85338	7.61429	8.20823	7.95533	8.30787	7.56827	8.04675	8.27688	7.60191	6.64377	7.01938	8.32703	7.81553	7.54053	6.97837	7.03404	8.48346	7.43183	8.5496	7.37008	8.459	8.34929	8.06194	7.95905	8.55651	7.09382	7.94245	8.41162	8.3535	7.88882	7.99683	8.58704	8.26669	8.85539
SDC3	4.40455	5.13648	4.76009	4.44554	4.68315	4.5219	4.23558	4.85958	4.59874	4.74709	5.22448	4.86863	4.9828	4.84484	4.1096	4.68784	4.74496	4.81746	5.01566	4.52279	5.32813	4.9117	5.34066	4.94811	5.44775	4.87112	4.83446	5.38549	5.38054	4.65541	4.72673	4.50698	4.69529	5.4454	4.74161	4.88931	4.40024	4.56494	5.04227	4.78548	4.77729	5.01884	4.85658	5.02561	5.28383	5.13904	4.79549	4.95738	4.57586
SDC4	10.3331	10.4047	10.6883	8.91518	9.01439	10.2103	9.8765	9.49889	8.55856	9.51206	9.79711	9.5864	9.76295	9.50631	8.71547	10.1176	10.1758	9.75071	9.13768	8.99177	8.92374	9.35206	9.15597	9.51993	9.7154	9.48689	8.98139	10.0851	10.3331	11.3764	8.90792	8.88574	10.2236	8.76357	11.0288	9.3779	8.7771	9.52221	9.86769	6.72582	7.53113	8.56065	8.2793	8.96478	7.05976	8.50501	8.74816	8.67518	9.04017
SDF2L1	7.3944	6.58831	7.20706	8.12512	7.49976	8.08964	8.95427	7.40844	7.44908	7.10218	7.62031	7.11013	6.94861	7.2504	7.68918	6.6971	6.66162	6.83374	6.75797	8.14974	6.87745	7.05188	7.1707	7.00711	6.65235	6.60448	6.78139	6.2495	7.16584	8.09569	7.5801	7.55109	6.46087	8.02169	6.24512	7.682	7.58436	8.3692	7.33167	7.58739	7.5693	7.46824	9.13625	7.9649	7.02045	6.62268	6.99405	7.18841	8.42642
SEC13	9.66705	9.58418	9.97607	9.91742	10.3837	9.84341	9.64664	9.87071	9.37195	9.73572	9.8814	9.50631	9.52692	10.0037	9.67914	9.53162	9.53162	9.79711	9.66471	9.51993	9.37553	9.49469	9.52692	9.57971	9.60203	9.87071	9.85754	9.54747	9.67914	9.79711	10.0781	9.38515	9.79711	9.84079	9.67397	10.149	9.65363	9.73572	9.80957	9.61513	10.1626	9.4587	9.8765	9.72059	9.88709	9.49889	9.58418	9.68133	10.2103
SEC16A	8.80514	8.78294	8.72285	8.89901	8.98658	8.01777	8.5938	8.50501	8.17877	8.09029	8.30328	8.47608	8.26284	7.37953	8.6102	8.96076	8.01373	8.20229	8.06935	8.28555	7.86282	7.9017	8.28088	8.3334	7.53113	8.61299	8.0821	8.3618	8.38313	8.23202	7.81425	8.20372	8.43682	7.92916	8.53775	8.20229	8.72173	8.62645	8.09103	8.59474	7.78379	8.58179	8.1469	8.76357	8.02722	7.84287	8.04273	8.09428	8.09696
SEC16B	4.8776	4.59986	4.62727	4.79677	4.06882	4.95296	4.53183	4.48294	4.37179	4.40619	4.31326	4.90206	4.27205	4.65918	4.91689	4.09141	4.99222	4.48842	4.61785	4.83473	4.45597	4.65647	5.15233	4.47633	5.19914	5.34171	4.31818	4.61354	5.05503	4.15007	5.48324	4.51433	4.67042	4.65001	4.44047	4.90556	4.72035	4.75982	4.35037	3.9814	6.1509	4.17314	5.10385	5.24011	4.18083	4.22121	5.08437	4.31539	5.19731
SEC22A	5.614	5.90928	5.60039	6.14248	5.48186	5.54698	5.75582	5.41036	6.08027	5.49642	5.72857	5.35155	5.3771	5.79617	5.50717	5.8846	5.57435	5.48186	5.38574	6.13423	5.28575	4.89244	5.44616	5.25724	4.99649	5.32652	5.55105	5.66853	5.21389	5.43786	4.77196	5.6963	4.66933	6.25967	5.09527	5.48077	6.16136	6.28872	5.48703	5.9524	5.36873	5.65649	5.37763	6.00701	5.3255	5.37562	5.3761	5.83167	5.68133
SEC22B	8.28715	8.24403	7.92916	8.92025	8.73271	8.39471	9.10436	8.44367	8.85651	8.5496	8.82472	8.08348	8.71326	8.33659	8.39378	7.75216	8.60336	8.74938	8.33111	8.7771	8.74938	8.19211	8.70684	8.52194	8.66943	8.70684	8.61571	8.74376	8.52098	8.27139	8.7166	8.57233	8.3692	8.98019	8.26015	8.72961	8.61955	8.48594	8.30259	9.04992	8.28253	8.53121	8.7997	8.92749	8.78049	8.515	9.06296	8.30259	8.90667
SEC22C	5.06989	5.20696	4.87141	5.51468	5.28626	5.61213	4.67921	5.15857	5.15177	5.24062	5.0804	5.29212	5.16183	5.6811	5.66381	5.24837	5.26882	5.47671	5.27056	5.20901	5.53933	5.3294	5.29682	5.42223	5.06937	5.27138	5.37505	5.78705	5.21364	5.16072	5.53345	5.36873	5.3973	5.51068	5.21009	5.25205	5.63863	5.4988	5.55903	5.79947	6.18181	5.33255	5.69681	5.57713	5.57435	5.55686	5.68185	5.50499	5.73784
SEC23A	7.39834	7.63004	6.80933	6.71132	7.95181	8.77122	7.61162	7.68427	8.61674	8.32948	8.24254	7.79705	8.51129	8.22033	6.40861	7.29952	7.75502	8.12921	8.08894	8.12714	7.8616	8.50229	8.44906	8.60912	7.65057	7.98273	8.08008	7.52791	8.01252	7.68918	6.98503	8.40912	7.88283	8.73374	8.19211	8.00352	6.92688	6.80135	8.22168	8.6596	9.258	7.42114	6.80971	6.728	8.46558	8.15539	7.68806	7.71416	6.74414
SEC23IP	6.14248	5.92341	6.02641	5.87729	6.60613	5.71251	5.86643	5.80837	6.24918	6.11775	5.75334	6.30613	5.94433	6.18349	6.41519	6.10724	6.17279	5.83801	5.61129	6.13452	5.78809	6.09943	5.87593	5.83858	6.1242	5.87754	5.79947	5.92929	5.84493	5.89345	6.28968	6.0743	5.91785	5.90613	6.04292	5.79976	5.73999	5.88293	5.85878	5.9566	5.9341	5.75582	5.80729	5.76904	5.76237	5.8405	5.56807	5.65004	5.72549
SEC24A	6.57701	6.25198	5.67626	6.68549	7.32007	7.05485	7.00953	6.53023	7.19348	6.53383	6.6313	6.56806	6.51452	7.10296	6.75501	6.23525	7.14941	6.2372	6.71477	6.71031	6.0018	6.63884	6.35959	6.67008	6.11535	7.43533	5.99128	6.44139	6.06372	6.25413	6.61567	6.62727	6.59741	6.38794	6.16778	6.31547	6.70755	6.38768	6.5801	6.89934	7.13821	6.34313	6.55256	6.49446	6.32937	6.14578	6.19086	6.03115	7.02125
SEC24B	9.41981	9.12562	9.33589	9.12562	9.51993	9.34643	9.1182	9.16059	9.15597	9.33935	8.76786	9.49679	9.42657	9.04458	9.22123	9.08069	9.34814	9.36256	9.37029	9.37979	8.87944	9.25284	8.6684	8.904	8.74717	9.23468	8.904	9.43061	8.82901	8.79301	8.1624	9.27399	9.60417	9.37553	9.75815	9.42657	9.47517	9.58836	9.33421	9.82268	8.98533	9.14844	9.45271	9.67179	9.17787	9.06702	9.41262	9.20818	9.36433
SEC24C	8.06326	8.4074	8.81698	7.82083	8.23742	7.79705	7.48075	8.25761	7.71584	7.90957	8.01854	8.46098	8.15254	7.91522	8.05838	8.08276	8.22464	8.06051	8.14974	7.69748	8.10722	8.16372	7.99063	7.82609	8.38313	8.00416	8.03382	8.38568	7.92785	8.63949	8.29596	7.39205	7.80967	7.67706	7.8007	7.82731	8.07083	7.61533	8.006	7.97398	7.78443	8.19063	7.83759	8.30408	7.99198	8.04342	7.69246	8.02657	7.99256
SEC24D	6.39978	6.24918	6.11207	6.44931	6.72437	6.97488	6.93637	6.80711	6.09699	6.35903	6.48917	6.81191	6.59477	6.35759	6.56105	6.08915	6.26055	6.78139	6.5424	6.40495	6.03669	5.93237	6.34183	6.11564	6.02293	7.37008	6.08201	6.56344	6.42198	5.9745	4.94923	6.74591	6.12793	6.88708	5.83631	6.39572	6.73344	5.44828	6.87107	6.90885	6.52605	6.47066	5.92058	5.88432	6.37296	5.8984	6.06342	6.46999	6.65273
SEC31A	10.1464	10.6335	10.4504	10.2656	10.509	10.2583	10.179	10.1589	9.82568	10.4385	10.5133	10.3067	10.761	9.59082	9.78487	9.92032	10.4464	10.4504	10.2583	9.92899	10.149	10.2842	10.5045	10.2738	9.87071	10.2138	10.251	9.97895	10.1015	10.1268	9.73844	9.96759	9.5164	10.5003	9.77748	10.4004	10.314	9.90882	10.4088	10.1433	10.1268	10.1046	10.3464	10.0691	10.3504	10.251	10.2699	9.93519	10.8659
SEC61A1	8.54076	8.02308	8.25841	10.0156	9.34643	8.71216	8.69383	8.22395	8.77356	8.54661	9.261	8.10369	7.84586	8.53121	9.41609	8.33726	8.32703	8.71755	8.45414	8.20155	8.63949	8.43938	8.94786	9.12562	8.42465	8.70234	8.57124	8.10854	8.83911	8.904	9.19173	7.88352	8.47079	8.82472	8.2761	9.30753	9.67637	9.39956	8.56556	8.3633	8.19934	8.05009	9.96485	9.23996	8.71951	8.36755	9.45072	8.48973	10.262
SEC61A2	3.71744	4.09857	4.06316	3.87186	3.83034	3.87052	3.77485	4.25727	4.04887	3.90552	4.09253	4.36119	4.27808	4.59905	4.58677	4.0238	4.07087	3.91438	4.22507	3.84918	4.23155	4.25536	4.0859	3.74826	4.19087	3.76512	3.89569	3.85084	4.06854	3.9257	4.40289	3.8248	4.00112	3.86062	4.21536	4.32599	4.01794	3.5653	4.0354	3.98915	3.9683	4.16089	3.76834	3.76302	4.1225	3.98324	3.73911	3.93986	3.72578
SEC61B	7.38476	7.71694	6.98845	8.75275	7.43779	7.11851	7.61908	7.28808	7.88469	7.05737	6.82023	7.18887	7.29437	6.95468	8.34214	7.6638	6.92364	7.76283	7.20787	7.81425	7.42028	6.74221	7.42554	7.08726	6.9893	7.16282	7.23178	7.64621	7.10644	6.93826	7.321	7.48668	7.19262	7.39488	7.11299	7.97919	8.2532	8.63659	7.67492	7.73805	7.11051	7.36024	8.42465	8.70234	7.60028	7.10132	8.43161	7.5459	9.20818
SEC61G	9.83109	9.71023	10.0309	10.1433	10.5003	10.3365	10.4163	9.95582	10.6095	10.3504	10.7235	10.0498	10.3962	10.251	10.5599	9.73065	10.251	9.83607	9.80957	10.2583	9.77247	9.76295	10.2067	10.166	9.61977	9.82568	9.92327	9.75815	10.0442	10.3464	10.3644	10.1364	9.67179	10.8498	10.0851	10.0883	10.1523	10.0185	9.81728	9.77247	9.28977	9.5184	10.2656	10.2656	9.93806	9.50828	9.97607	9.77497	10.4704
SEC62	8.73928	8.53962	8.97601	9.3094	8.61398	8.70234	8.58278	8.47526	8.62547	8.43431	8.70457	8.4878	8.2261	7.83091	8.56161	8.45075	8.43431	8.7088	8.441	8.76149	8.76677	8.13751	8.69826	8.27773	8.05195	8.2737	8.35764	8.45158	8.17877	8.43348	7.74584	8.91408	8.4134	8.09696	8.13267	8.6335	9.1103	8.78537	8.72631	9.32213	8.45492	8.73374	9.03565	9.32905	8.70343	8.53311	8.84976	8.84133	9.17932
SEC63	6.64412	6.6298	6.08513	8.03881	6.56508	6.53128	6.30047	6.67633	6.48137	6.46528	6.35628	6.60544	6.51674	6.10522	8.09505	6.59546	6.34929	7.26565	6.73275	7.02125	6.87784	6.69853	6.96747	6.50724	6.58378	6.64496	6.81191	7.04388	6.60015	6.25567	6.14488	6.87636	6.55296	6.46027	6.3633	7.31243	7.72052	7.7634	7.106	7.07936	6.61435	6.24703	8.01649	7.91344	6.90202	6.96669	8.02169	7.00158	8.65335
SEL1L	6.43077	7.1796	7.12102	11.2021	7.23643	7.06878	8.95041	6.13533	6.35167	6.72475	6.44703	6.34997	7.15073	6.79652	8.06935	6.39358	6.4938	9.04992	7.40709	7.52599	7.34342	6.99566	6.55087	6.95981	6.39634	7.04347	7.07435	8.1512	7.11348	6.40924	6.17251	7.06511	6.90354	6.8472	6.78561	10.3763	10.7508	10.1758	7.48488	7.00997	7.11214	6.64839	10.1962	10.3575	6.85845	7.02602	10.6883	7.8964	11.2696
SEMA5A	5.79507	6.38143	6.31394	7.02446	6.20668	6.17975	6.1596	6.25933	6.87712	6.84833	6.46933	5.71725	6.03609	4.94555	4.71238	5.73322	6.01605	6.54489	5.98355	6.33125	6.27614	6.18034	5.6938	5.80181	5.76112	5.80729	6.84398	5.85217	6.06966	6.14123	4.72232	6.27928	5.38521	6.70681	5.69193	6.10617	6.98545	5.8383	6.59055	7.33386	5.85577	6.76355	6.25866	6.58567	7.85163	6.68034	5.92341	6.7469	6.14458
SEMA5B	6.3266	6.23665	6.16951	6.78211	6.30453	6.47905	6.55523	6.36238	6.3008	6.34591	5.91647	6.4948	6.45613	6.38984	6.76289	6.13503	6.42366	7.0773	6.56377	6.35995	6.70183	6.43449	6.71132	6.45418	6.5533	7.165	6.52044	8.47002	6.44286	6.19051	6.08886	6.40553	6.43745	7.04071	6.44643	7.41367	6.9776	6.89498	6.50429	6.62562	6.2647	5.96902	7.33167	7.43288	6.40799	6.39048	7.96094	6.5937	6.90535
SERPINA1	7.70411	7.84464	8.86908	7.75102	7.02564	8.51417	7.47101	8.10793	7.24863	8.40912	7.18562	7.93349	6.00902	8.98019	9.53962	6.8849	8.81801	8.422	8.34533	7.66865	7.46473	8.22313	7.27219	7.67544	7.02009	9.65594	8.23452	9.05886	8.49765	8.17517	11.4509	7.99942	7.51019	6.82642	6.76251	8.61775	8.22101	7.6908	9.20983	6.98345	6.92258	8.46001	6.2161	6.8054	7.48615	7.49763	7.23382	7.87206	5.62061
SFTPD	3.77335	3.91806	3.88197	6.12216	4.50366	3.58478	3.94469	3.5786	3.66861	3.66447	3.49259	3.51861	3.40379	3.7235	3.4491	4.05867	3.38812	3.6474	3.874	3.99721	3.69743	3.64834	3.11018	3.78361	3.47291	3.45242	3.65902	4.02054	3.72149	3.58682	3.70255	3.63139	3.54335	3.45614	3.83678	4.87786	5.5318	6.15775	3.98242	3.74135	3.73686	3.68987	5.29965	3.74384	4.00905	3.70357	3.5665	4.92982	6.27065
SGMS1	6.45318	6.696	7.37953	8.02169	7.14729	6.52306	7.34024	7.2189	7.42165	6.83591	6.42822	7.2145	6.93323	6.74012	7.03645	6.39453	7.542	7.6317	6.75661	6.85452	7.1769	7.20662	7.08102	6.5896	6.63749	7.18477	7.66981	8.30485	7.16951	6.08082	6.42949	7.39025	6.87939	7.66277	6.39719	7.38286	7.99632	8.32622	7.25086	8.86021	7.84116	7.46096	7.86465	7.82192	7.40612	7.55267	8.79512	7.23303	7.59071
SLC17A5	8.55651	8.1469	6.5215	6.78596	7.65329	7.12443	7.36591	7.84116	7.17293	7.7634	7.55267	7.8919	8.02169	6.62818	6.95591	7.71529	7.5666	7.5362	7.45097	7.96287	7.30688	8.10369	7.11765	7.46523	6.95981	7.65166	7.71931	7.40659	7.44703	7.49308	7.67145	7.54732	7.44406	7.3786	7.71989	7.36024	6.83374	6.34098	7.80842	7.26033	7.92528	7.1541	6.17668	5.65838	7.16411	7.44167	6.54858	6.98068	7.2526
SLC26A2	6.81625	7.1757	6.91109	7.13601	7.04596	6.75532	6.48722	7.58849	7.47664	7.04724	7.13227	7.77297	7.32907	6.95237	7.7886	7.2705	7.16456	7.43485	7.2638	7.64014	7.27909	6.83739	7.3375	7.09515	6.96826	5.69329	7.27482	6.87975	6.87332	6.95981	5.33255	7.85357	7.3477	7.12443	6.47602	7.55649	7.22424	7.54793	7.65268	7.81088	8.10369	7.77188	6.65105	7.2849	7.64014	7.45298	7.23303	7.42986	7.42699
SLC35A1	9.60877	8.93616	9.52221	8.76149	9.37553	9.57971	9.78487	8.98019	8.54076	9.19643	8.56161	9.04304	8.37467	7.82192	9.15146	9.7154	8.58704	8.69597	8.74035	9.68929	8.67232	9.01072	9.01573	10.3219	8.77252	9.08213	9.34814	8.92502	8.84256	8.04394	7.02789	8.71951	8.66478	8.41782	9.5044	8.97188	8.9054	8.30485	8.47965	9.01072	8.50139	8.22395	8.29134	9.07146	8.41687	8.75379	8.54452	8.82156	8.14906
SLC35A2	5.64539	5.54671	5.71197	5.58877	6.12336	4.92922	6.15557	5.30246	5.66604	5.4695	5.5825	5.75078	5.72995	5.63942	5.20828	5.27508	5.74506	5.18063	5.47857	5.22662	5.46606	5.65463	5.91247	6.066	5.66909	6.1228	5.29265	5.51434	5.14564	5.85851	6.25106	4.98201	5.45663	5.72549	5.81777	5.31331	5.05529	5.04956	5.21599	4.88653	4.99568	4.67676	5.2836	5.01312	5.19563	5.17681	4.93278	4.64631	5.38492
SLC35C1	6.5674	6.56937	6.73976	5.72257	7.19008	6.5401	6.22658	6.22271	5.46349	6.26023	7.27994	6.11654	6.07722	6.42696	4.72944	6.04598	6.59942	5.55319	6.07605	6.20788	6.56344	6.26858	6.43387	7.3944	6.46933	6.62024	6.52505	5.3779	6.47972	6.28131	7.40931	5.31627	6.62696	6.77453	7.38286	6.24603	6.02759	5.60967	5.3479	5.3761	6.84289	5.45609	5.82171	5.85631	6.15293	6.39421	5.48166	5.38076	6.30453
SLC35C2	6.06111	5.72053	5.72681	5.7004	5.76709	5.9203	5.93095	5.67074	5.75611	5.58877	5.58574	5.60594	5.58498	5.96676	5.84962	5.61046	5.52576	5.40719	5.45758	5.46241	5.62887	5.62783	5.73243	5.76185	5.777	6.15118	5.60013	5.56831	5.7004	5.9392	5.91956	5.44749	5.7873	5.74994	5.521	5.5119	5.7128	5.63834	5.75412	5.55319	5.5539	5.61729	5.70431	5.51627	5.62362	5.46925	5.74282	5.65354	5.88834
SLC39A8	4.33774	4.40989	4.3595	6.19321	4.56463	4.56013	4.69755	4.37372	4.7069	4.64861	4.55149	4.58436	4.70522	5.42325	5.03496	4.4497	4.63538	5.16854	4.51973	4.95632	4.66513	4.57248	4.84514	4.44666	4.03348	5.04503	4.62033	4.54458	4.80873	4.43105	4.24786	4.91197	4.25864	4.73768	4.47437	5.45279	5.99549	5.86976	4.74653	5.12486	4.57533	4.58183	6.55087	6.41823	4.72917	4.73463	5.87783	4.70749	6.41659
SLC51B	3.66643	4.10822	3.76834	3.76148	3.78389	3.80055	3.71055	3.69962	3.72251	3.58753	3.60352	3.78191	3.76857	3.6621	3.69645	3.66001	3.77867	3.71744	3.64288	3.63216	3.63728	3.73245	3.65902	3.8708	3.78563	3.82584	3.76607	3.77611	3.6437	3.62559	3.92624	5.73892	3.73541	3.76197	3.69594	3.76302	3.81475	3.85872	3.81416	3.78236	8.76025	3.65854	4.06094	4.07011	3.95951	3.94765	3.98193	3.75657	4.2762
SLC7A11	5.31724	5.1851	5.98686	5.23428	7.09122	7.13305	5.70011	4.64105	4.55899	6.10522	5.43412	6.68578	6.16256	7.76454	4.70467	5.62119	6.62268	4.82817	5.04528	7.31097	4.3512	4.99673	5.51434	5.99407	5.06187	6.95468	5.01162	4.51408	5.40692	4.83473	4.91254	6.65235	4.90556	7.11601	5.16768	5.01705	4.97902	5.16822	4.10987	3.18671	4.65541	4.08532	5.59145	5.48297	3.67549	3.76934	5.07748	3.7625	5.16101
SLMAP	5.68514	5.84464	5.79222	5.13435	6.25596	5.79249	5.28432	5.20612	5.86949	5.68055	5.53729	5.71702	5.92086	5.65595	5.35599	5.8714	5.93439	5.65865	5.76878	5.78304	5.14434	5.3973	5.42989	5.90558	5.37085	6.30421	5.53784	5.88119	5.32132	5.20643	5.25697	6.27774	5.57108	5.69168	5.52156	5.53835	4.91113	5.38003	5.37323	5.93354	7.61213	5.1827	5.51964	4.89362	5.25878	4.97523	4.90232	5.18631	5.12326
SPON1	6.04213	6.18003	5.84412	5.80563	6.64496	6.37296	7.00507	7.30784	7.00953	6.85087	6.84754	6.56196	7.36404	4.84868	5.00126	6.72903	5.76478	7.18686	6.9639	7.00669	7.61593	7.0773	8.01006	6.38358	6.57741	4.75241	7.86905	5.56268	7.01307	7.10932	4.68913	8.02169	6.11408	6.99405	5.71251	6.78632	5.75412	4.55125	7.12019	9.14236	7.5459	6.95393	4.67127	5.86217	9.27262	7.73033	6.6825	7.66919	3.58145
SPON2	8.536	8.89685	7.83515	7.49608	9.18399	9.37391	7.7959	10.0185	8.65249	9.08519	9.31319	9.0472	8.53421	6.68549	7.35621	9.78233	8.97059	9.07284	9.21123	7.72332	9.1119	9.11491	8.36837	10.0591	8.99603	7.08187	9.26454	7.56607	9.31839	9.07431	9.23653	7.71189	8.71096	8.9286	8.81911	7.96875	7.52554	5.69792	10.4959	8.44992	6.75726	8.25462	6.03781	6.95815	9.20983	9.19173	7.53269	9.17154	6.32752
SPPL3	5.67567	5.83358	5.43182	5.42247	5.47057	5.48728	5.0474	5.7271	5.37135	5.19914	5.4323	5.33651	5.47697	5.69525	6.31332	6.03906	5.53667	5.51858	5.51163	5.2865	5.32368	5.3232	5.40587	5.26264	5.40491	5.53645	5.286	5.59145	5.3884	5.5029	5.71702	5.62967	5.91515	5.05503	5.54198	5.59657	5.39556	5.60732	5.58903	5.26423	5.62032	5.53153	5.6367	5.54403	5.55319	5.42529	5.5237	5.64949	5.57629
SPTA1	3.05178	2.93773	2.98048	2.9612	3.00001	2.97507	2.9612	2.96476	2.94946	3.00333	2.98787	2.99499	2.96304	3.00777	2.97527	2.94823	3.00195	2.9612	3.02658	2.98463	3.02872	2.98008	3.0244	2.98505	2.98726	2.92498	2.96834	2.95588	2.98485	3.05285	2.95773	2.99068	2.97629	2.94925	2.99101	2.93983	2.94067	2.97586	2.98214	3.2859	2.99321	2.98132	2.90768	2.88759	3.02523	3.02176	2.96285	2.94109	2.90581
SPTAN1	6.2647	6.58896	6.4016	5.83115	6.11535	6.29959	6.55941	6.31363	5.90866	6.19494	6.36084	6.19382	6.48722	5.66745	5.81247	6.56702	6.04054	5.93494	6.06083	5.75826	6.32023	6.66686	6.41229	6.40586	6.60384	6.77453	6.44075	6.6098	6.41659	6.47382	6.67566	5.84252	6.44541	6.2311	6.29159	6.42633	5.86217	5.9589	6.26767	6.38702	5.8921	6.18206	6.06568	5.9566	6.39274	6.40005	6.45553	6.31898	5.94678
SPTB	4.65566	4.69418	4.57188	5.09388	4.40234	4.97987	5.079	4.70413	4.30684	4.41743	4.4505	4.55899	4.38953	4.36738	4.68376	4.27179	4.48127	4.49041	4.62727	4.43297	4.61493	4.57613	4.43163	4.62119	4.96419	4.57988	4.73463	4.77094	4.47464	4.77278	4.51973	4.56244	4.83556	5.00286	4.50608	4.89494	4.79783	5.20105	4.41292	4.72944	4.50698	4.89119	5.37213	5.24165	4.61045	4.96772	4.79405	4.90286	5.40051
SPTBN1	5.56938	5.39502	5.62676	5.18842	5.26451	5.66051	5.43948	5.44978	5.45306	5.42661	5.44298	5.63111	5.61481	5.14245	5.60888	5.87308	5.40436	4.92731	5.33255	5.50744	5.37841	5.79311	5.64511	5.15857	5.7934	5.904	5.40406	5.42529	5.34171	5.57245	5.8344	5.83222	5.59435	5.11542	5.2708	5.60257	5.10473	5.69439	5.41279	5.23452	5.41738	5.7547	5.31543	5.3595	5.46507	5.57358	5.45145	5.46773	5.25775
SPTBN2	5.69925	7.06511	5.88212	5.35627	5.65436	5.96133	4.75673	5.05688	5.32864	5.10901	5.63226	5.39838	5.39838	4.55682	5.2258	6.19442	6.11008	5.37763	4.6258	5.09194	4.3179	5.57054	5.42865	4.84652	4.35354	5.73405	5.26395	5.31382	5.444	6.46496	5.6367	4.97742	5.07666	4.85463	5.5999	5.45712	5.468	5.16154	4.71555	4.3451	4.10325	4.87141	5.43041	5.44799	4.36509	4.95521	4.86895	4.83025	6.14248
SPTBN4	5.02656	4.88574	4.98361	5.34227	4.85985	5.1168	5.26121	4.91582	4.88516	4.79759	4.88099	5.03634	4.85985	5.05209	5.08595	4.80541	4.92922	4.90014	4.80482	4.93092	4.79926	5.03796	4.87193	4.94977	5.1427	5.30142	4.90664	5.2599	5.08949	4.8533	5.34921	5.06398	5.27723	4.95766	5.00101	5.30246	5.19212	5.38199	5.00398	5.03852	4.98494	4.89694	5.69	5.40824	4.98148	4.9249	5.33807	5.19993	6.1779
SPTBN5	4.75928	4.46504	5.27006	4.16608	4.48551	4.52416	4.15811	4.40317	4.90744	4.41967	4.67153	4.37977	4.38335	4.51999	4.62061	4.7781	4.47407	4.43839	4.46359	4.31869	4.88046	5.38919	4.505	4.4621	4.69008	4.5452	4.49975	4.45989	4.61951	4.7798	4.93797	4.35442	4.17959	4.5042	4.45797	4.41572	4.10547	4.53549	5.38549	4.52496	4.50858	4.47605	4.20843	4.59479	5.31033	4.89171	4.67076	4.49461	3.89957
SRD5A3	8.20978	8.39152	8.54262	7.15942	6.00264	6.8112	7.25817	4.91636	6.11008	6.42917	7.02714	6.24603	7.08275	5.51325	6.60317	5.61129	7.23605	5.73432	6.23554	6.77286	5.72741	7.38775	7.08977	7.42028	4.9632	9.17471	7.08064	5.08595	7.83821	5.77591	5.02873	6.60681	6.47318	9.20484	7.20229	6.5215	6.90465	6.14177	4.86521	4.3992	4.53637	5.03746	5.82779	5.85491	4.80321	6.02585	6.76183	4.97742	6.1368
SRI	8.62152	8.47348	8.5778	7.93218	9.45485	9.01702	8.61955	9.02696	9.00259	9.05296	9.08069	8.84256	9.08791	8.47002	7.87532	8.66648	8.85793	8.5576	8.19864	8.08008	8.68098	8.74376	8.81911	9.59322	9.16817	8.64357	8.31504	8.22395	8.86908	9.57527	7.7363	9.57314	9.38874	8.28019	9.77247	8.97601	8.08474	8.07083	8.48688	8.51032	8.92627	8.28397	8.28884	8.4283	8.58502	8.32867	8.1505	8.28485	8.01252
SRP9	11.8849	11.7689	11.9787	11.3764	12.2808	12.3022	12.2398	11.871	12.5187	12.1601	11.9015	11.8142	11.9493	11.857	12.4545	12.4545	12.1029	11.4798	11.7562	12.0288	11.5762	12.1029	11.7972	12.3905	12.0125	12.1418	11.6474	11.871	11.7192	11.9336	12.1601	11.6474	12.1969	12.6483	12.6271	11.9787	11.6579	11.233	11.635	11.9787	11.5539	11.8142	11.2101	11.5877	11.612	11.5984	11.6579	11.3855	11.3477
SRPRA	8.06404	8.04743	8.07785	9.95305	8.96613	8.70343	9.00383	8.22168	8.46001	8.34456	8.54175	8.01509	8.24936	8.58888	8.59474	8.75479	8.41782	8.89555	8.31816	8.03314	8.81698	8.80205	8.56742	8.76569	8.59275	8.14615	8.6465	8.4326	8.422	8.49837	8.95041	7.97331	8.89064	8.4203	8.64567	9.54371	9.58836	9.88709	8.81192	8.73594	8.02377	8.26669	10.0591	9.66284	8.80514	8.86021	10.149	8.73928	10.5045
SRPRB	7.00997	6.54386	6.83959	8.57505	7.79359	6.93018	8.05009	6.98146	7.0614	6.89048	7.82083	6.61268	6.97715	7.18644	8.36567	6.58413	6.82602	7.18932	6.66864	7.3585	6.62298	6.44643	6.93712	6.99047	6.70505	7.09599	6.5348	7.017	7.0785	7.12639	7.41276	7.23087	6.68681	7.08398	6.4895	7.5362	7.84521	8.5496	7.07936	7.40073	6.83488	7.16238	8.79739	8.3334	6.87372	6.69813	8.01442	7.10467	9.1119
SSR4	11.1733	10.9086	11.2778	12.6046	12.0622	11.2608	10.9201	11.4509	11.4123	11.1365	10.9866	11.1508	11.1733	10.4004	11.9493	10.8081	10.8985	11.9336	11.2949	12.4545	11.5434	11.857	10.9559	11.1081	10.914	11.7562	11.2696	11.705	11.2862	11.2608	11.2949	11.7192	10.8935	10.2546	11.1589	12.3471	12.4127	12.7759	11.9951	11.8142	11.083	11.3118	13.1099	12.9604	11.6818	11.612	12.8185	11.9178	13.1318
ST3GAL1	6.86565	7.34292	8.53421	6.03836	6.38199	7.07936	4.99432	6.27008	6.77828	6.96549	6.78632	6.44801	6.53157	5.65994	5.27405	7.06878	7.24594	6.25443	7.55214	6.3799	6.76459	7.20453	6.12851	6.58696	6.64046	6.67141	6.59942	6.58047	6.93323	7.85982	7.06703	6.30237	6.22778	6.73242	6.37025	5.80867	5.95579	6.58763	6.30804	6.6313	4.73166	6.76459	5.7445	5.89783	6.53023	6.89861	6.09344	6.59805	5.94059
ST3GAL2	5.60175	5.34066	5.65649	5.37661	5.25827	5.46976	5.26831	5.67567	5.49965	5.57487	5.40663	5.81835	5.48166	5.70886	5.50422	5.20218	5.52731	5.51378	5.4941	5.31875	5.75104	6.09763	5.90671	5.73892	5.58627	5.81663	5.5566	5.79122	5.81554	5.59934	4.99939	5.38384	5.52072	5.57713	5.48142	5.68378	5.53696	5.77128	5.69439	5.82804	5.66745	5.67475	5.49662	5.41145	5.89534	5.92901	5.98071	5.55134	5.54754
ST3GAL3	4.1811	4.26183	4.22754	5.14755	4.26541	4.3992	4.24033	4.28864	4.2414	4.27567	4.3344	4.28316	4.26106	4.67816	4.39266	4.1551	4.37759	4.49946	4.23097	4.13848	4.4107	4.35094	4.41544	4.3979	4.37921	4.65836	4.49892	4.835	4.32929	4.32458	4.54458	4.33742	4.26956	4.58436	4.35295	4.54087	4.83234	4.83025	4.44886	4.48582	4.34734	4.35383	5.19886	5.23824	4.37897	4.41517	5.25641	4.55899	5.30295
ST3GAL4	4.34235	4.47792	4.17207	4.253	5.20483	4.39006	4.84868	4.29227	4.18918	4.4618	4.38032	4.37012	4.45797	4.75099	3.99558	4.55817	4.64181	4.41262	4.26078	4.28287	4.1551	4.49775	4.45338	4.20244	3.93836	4.49379	4.43105	4.38863	4.35177	5.14727	4.78095	4.16006	4.30055	4.63766	4.08767	4.44802	4.05215	4.02217	4.41572	4.36178	3.85143	4.18653	3.69475	3.94064	4.17149	4.55707	4.27837	4.41159	4.35524
ST3GAL5	4.94838	5.24352	5.15048	4.72917	4.72035	4.52686	4.72209	4.84764	4.77569	5.09854	4.8495	4.59816	5.30246	5.64424	4.67971	4.52445	4.60246	4.78411	4.83284	4.98177	5.13406	5.05688	4.91636	4.62897	4.98732	4.57273	4.77929	4.33221	4.76985	4.82659	4.32	4.96527	4.8977	4.63707	4.81324	4.92381	4.64519	4.65918	5.11403	5.47057	4.22039	5.24377	4.84428	4.75128	5.3165	4.97631	4.37151	4.95521	4.78066
ST3GAL6	4.47437	4.14046	3.97446	4.65132	4.04522	4.52496	4.57988	4.12727	4.55735	4.66703	4.52815	4.23305	4.65541	4.34874	4.41967	4.4735	4.70662	4.40024	4.61045	4.74937	4.34458	4.15094	4.52136	4.05242	3.79876	4.43669	4.27593	4.4505	4.42084	4.28509	5.89401	4.40679	3.95795	4.59479	4.16389	4.40566	4.5919	4.37066	4.36823	4.414	3.86732	4.24332	4.50444	4.40512	4.24539	4.28898	4.34207	4.34458	4.59105
ST6GAL1	5.00286	4.65265	5.14696	5.01238	5.46635	4.69696	6.83851	5.04556	5.01884	5.37372	5.1276	5.03555	4.92461	4.88227	6.17757	4.85682	4.53864	4.94954	5.05771	6.02867	6.05512	5.94934	5.52731	5.48595	5.66771	5.9287	5.55237	5.69168	5.62725	5.19269	7.04347	5.26506	5.55793	4.92812	4.97657	5.35337	4.81892	4.77783	5.98248	6.08854	4.83581	5.23245	4.38418	4.82631	5.82171	6.05916	5.23328	5.75443	4.72616
ST6GAL2	3.52756	3.88197	2.73407	2.72643	3.2353	4.46676	4.63454	4.0483	4.38418	4.59788	4.35811	3.01944	4.16711	2.85844	5.69305	3.8338	3.39378	4.2804	3.75886	4.22071	3.24917	3.725	4.45024	3.66889	2.72407	3.79143	3.63598	2.65398	3.61306	3.5786	2.68097	3.72396	2.76888	4.41967	3.80236	3.87158	2.62785	2.77757	4.6606	3.74486	3.99974	3.89332	2.71797	2.68444	3.83115	3.57836	2.83023	3.24039	2.72407
ST6GALNAC1	9.35574	8.81801	10.2992	5.59657	8.60239	7.59542	9.96162	6.14177	8.1715	7.40221	8.43083	9.03565	8.03881	2.66794	3.1423	6.47821	8.80093	6.70467	5.77886	9.17624	6.9247	6.14092	6.68105	7.46429	8.06119	9.66284	7.20103	6.1599	7.93483	7.23605	2.24726	7.92347	7.97668	8.27449	9.35574	7.19135	5.9304	3.00019	4.62391	4.12941	9.58418	5.17814	2.63977	5.99952	4.34399	4.50168	4.48811	4.39738	2.77224
ST6GALNAC2	5.38971	5.25775	5.07748	5.89869	4.97902	5.33526	4.75421	5.00317	5.05263	5.04227	5.45279	4.90129	5.19478	5.18246	3.91806	6.7547	4.64801	5.09882	5.03773	4.94159	5.29184	5.08012	5.20852	4.40761	4.81493	4.69449	5.71945	5.80313	5.84277	6.26325	7.27219	5.31148	5.72116	4.33035	5.34816	5.81803	6.01686	6.13621	5.44081	5.06727	5.22891	5.0715	5.36186	5.60152	4.82097	5.94851	5.36743	5.60099	5.61238
ST6GALNAC3	4.42112	3.53027	4.44305	4.07035	4.63065	4.05694	6.86746	3.99373	4.15535	3.78964	4.05424	5.52419	4.3979	4.58654	4.72563	3.92916	3.0369	4.07641	4.36879	6.56287	3.93213	3.11301	3.99641	4.24596	4.15558	3.42108	4.02893	4.22724	3.96856	4.10136	4.1096	4.87418	4.26741	3.78563	4.18976	3.96989	4.06261	4.0564	4.40708	4.66456	4.3732	3.98381	4.50779	3.51238	4.38888	4.03376	3.67974	5.03255	3.87291
ST6GALNAC4	5.34227	5.21038	5.20247	6.58438	5.70266	5.41062	6.02925	5.13023	5.40352	5.31676	5.45364	5.11832	5.26341	5.2184	6.19723	5.01538	5.07774	5.62541	5.47458	5.14245	5.614	5.5478	5.59768	5.23125	5.26316	5.62414	5.51627	5.42197	5.67101	5.55344	6.16601	5.02824	5.62333	5.47671	5.46294	6.20017	6.39079	6.53226	5.78618	5.6868	5.72432	5.26395	7.11299	6.39915	5.66496	5.6189	6.676	5.63779	7.61481
ST6GALNAC5	3.83354	4.3512	3.74759	3.65949	4.38782	5.56294	4.41802	5.21789	4.63122	5.03443	4.86725	4.17878	5.73379	4.37401	3.80183	4.1157	4.77596	4.61324	4.38362	4.20184	4.47856	4.00696	5.82282	4.43185	3.70332	5.17653	4.64801	5.2575	4.97204	4.94134	5.72288	4.49804	3.6233	5.56432	4.48234	4.43053	3.41996	3.51884	4.01147	6.28743	5.15048	4.30271	3.02717	3.50037	5.2414	4.01637	3.6778	4.17821	2.8276
ST6GALNAC6	5.29734	5.83939	5.73565	5.69329	5.37269	5.614	4.84736	5.65086	5.44924	5.8927	5.4387	5.59544	5.60758	4.57002	4.67153	5.74121	5.44924	6.07287	6.34377	5.41306	6.18814	5.86475	5.88968	5.87839	5.81416	4.95194	5.89893	4.84817	5.56349	5.94181	6.42633	5.29527	5.71197	5.38076	5.53784	5.69193	6.10846	6.70755	6.31428	5.70208	4.96372	6.19529	6.27956	6.29959	6.02987	6.06626	5.77886	6.06428	7.32952
ST8SIA1	3.00841	3.18276	3.18316	3.40588	3.32493	3.03609	3.01465	3.51111	3.54264	3.52778	3.5404	3.27238	3.28788	3.17064	3.1205	3.13534	2.99636	3.38812	3.33506	4.11746	3.47378	3.8211	3.6979	3.39574	3.36726	3.14455	3.16419	2.9334	3.12283	4.18217	3.21752	3.77207	3.13291	3.38768	3.30189	3.24458	3.25728	3.0874	3.24441	4.30998	3.6123	3.59455	3.23343	2.93697	3.54636	3.62743	3.2913	3.32432	2.93318
ST8SIA2	2.80681	3.48354	3.1087	2.78073	3.00526	2.82277	3.12695	2.83023	3.66643	3.64437	2.98888	2.83002	2.81199	2.84172	2.90362	3.10643	3.40628	3.00919	3.06257	3.19414	2.84378	3.02621	2.8401	3.06342	2.80832	2.76168	2.82455	2.75821	2.83047	2.82302	2.82068	2.84831	2.82666	3.26588	2.83892	2.78104	2.71401	2.72582	2.7962	2.78538	2.73239	2.79374	2.70614	2.71051	2.82519	2.79144	2.72967	2.74844	2.70586
ST8SIA3	3.70105	3.33999	3.75339	4.54954	3.25521	4.67468	3.53975	5.43099	3.17362	3.82134	3.4575	3.54085	3.18693	3.45434	3.56388	3.59705	3.48377	4.46298	4.23643	3.93836	3.66188	3.44188	3.146	3.30468	3.68893	3.56134	4.0936	6.07401	3.85143	3.14539	3.4513	3.76659	3.59705	3.40354	3.54662	3.57384	3.975	3.85954	4.86981	4.5389	3.29869	4.68492	3.59338	3.80422	4.14428	3.95103	5.13878	5.49995	3.46354
ST8SIA4	3.99721	4.4963	4.17959	4.64406	4.84595	4.46533	3.97421	4.94134	5.25097	5.02824	5.30481	4.81831	5.39658	4.85278	4.27232	4.60485	4.8073	5.14942	5.326	5.68378	5.74553	5.48297	5.53885	4.56724	4.77196	4.99801	5.40326	4.49264	5.34197	4.61554	4.15886	5.4038	4.70494	5.05013	4.73302	4.79731	4.65619	3.86997	5.38785	5.87672	4.53439	5.02623	3.7431	4.269	5.84078	5.62676	4.8939	5.24965	4.00641
ST8SIA5	3.92102	4.08107	3.88227	4.03207	3.8471	3.95344	3.87563	3.80321	3.74242	3.90767	3.86367	4.10023	3.9401	3.93403	3.98506	3.90241	3.85745	3.88085	3.84685	3.8572	3.92256	3.95188	3.88728	4.03182	3.90767	3.92232	3.80755	3.95321	3.91388	3.92832	3.92517	3.85353	3.98269	3.99641	3.81212	4.13301	3.99187	4.17821	3.92075	3.99535	4.12387	3.84225	4.12464	4.11802	3.87265	4.02465	4.42709	4.0859	4.10136
STAU1	9.87897	10.0342	9.95878	10.1523	9.63745	10.262	9.61736	9.75331	9.44476	9.65363	9.60637	9.8489	9.78984	9.20484	9.80477	9.58177	10.0558	9.80248	9.77497	9.06014	9.65819	9.76054	9.80248	9.96485	10.509	10.4125	9.66085	10.1523	9.64446	10.3331	10.1558	9.19341	10.288	9.83109	9.76295	9.9146	10.1203	9.61091	9.79235	9.09486	9.61091	9.15886	9.97895	9.9116	9.44078	9.60203	10.3219	9.57971	10.3962
STT3A	7.46869	6.71298	7.04071	8.19063	8.29521	8.12512	7.89709	6.84289	8.43348	7.2763	7.6078	7.07317	7.27396	8.30787	9.37979	7.89709	7.18968	7.33302	7.24046	7.66099	6.87939	7.19478	7.44655	7.56078	7.1097	7.44077	6.90503	6.45418	6.67566	7.3526	7.67973	7.57512	6.98309	7.77695	7.2863	7.14079	8.31504	7.56289	7.65166	7.18132	7.41411	6.92794	7.45249	7.90832	7.11476	6.88708	7.73158	6.0946	7.96037
STT3B	6.69324	6.6134	6.7675	6.95856	6.81625	6.83217	6.49581	6.74803	6.42425	6.4938	6.61866	6.66482	6.78314	6.8151	7.14604	6.9247	6.76497	6.83992	6.68387	6.7999	6.48529	6.48849	6.49311	6.38261	6.76289	7.2159	6.33249	7.67254	6.54276	6.54728	6.65313	6.93289	6.79613	6.77535	6.65586	6.95051	6.83706	7.18562	7.15031	6.86331	6.39302	6.94082	6.99247	6.99766	6.72869	6.53649	7.30359	6.58696	7.26695
STX17	6.21723	6.43047	6.28743	6.68578	6.29645	6.02896	6.35137	6.30392	6.45487	6.37702	6.19416	6.37296	6.30175	6.07749	6.68348	6.7657	6.00614	6.30584	6.1857	6.41044	6.47382	6.13097	6.32719	6.30304	5.97337	6.24279	6.06538	6.68172	6.20883	6.27741	6.57741	6.44896	6.28374	5.7547	6.25293	6.22778	6.64209	6.64967	6.19321	6.24575	6.63404	6.27774	7.02367	6.99366	6.29097	6.29395	6.50939	6.45553	7.13468
STX5	5.48807	6.0717	5.48109	6.1466	6.38636	6.50027	6.52338	6.19614	6.38326	6.19752	6.49711	5.87645	5.96026	6.16541	5.97105	5.33228	6.19209	6.21143	5.95488	6.03034	6.62061	6.01659	6.75625	6.56319	6.56637	6.96789	6.56574	6.15293	6.43418	6.42397	6.59305	5.52072	6.4394	6.5801	6.63719	6.30521	6.23262	6.26268	6.07374	6.22153	5.64286	5.74717	6.60279	5.30189	6.34005	6.18427	6.91867	6.46465	7.53676
SUCO	8.81432	9.05163	9.82019	9.92899	9.22123	8.82034	9.76054	8.64943	8.58069	8.34766	8.3535	9.01702	8.39551	8.81316	10.3606	10.108	8.30003	9.11491	8.56664	9.09486	8.10793	9.19173	8.02851	8.30328	8.28884	8.14831	8.22901	9.77748	8.43682	8.01183	8.3666	8.24254	8.84622	8.45578	8.54354	9.76054	10.0408	8.90913	8.43508	8.85207	8.54076	8.99456	9.27921	9.07284	8.11281	8.55856	9.02848	8.80301	10.7135
SVIP	7.34112	7.37421	7.67758	7.56975	7.51924	7.58274	6.89197	7.11561	6.76387	7.30736	7.28261	7.6078	6.50871	6.04653	6.60448	7.18932	7.58114	7.01151	6.94649	7.73805	6.92688	7.0154	6.65068	7.76399	7.51384	7.94363	6.99606	8.22033	7.04886	6.67996	7.04596	7.41128	7.2863	7.51622	7.45489	7.18439	7.41603	7.61696	6.69291	7.37237	7.15457	6.99534	7.9211	7.80724	6.52044	6.82715	7.81425	7.32998	7.91462
SYNE3	3.38226	3.31925	3.4938	3.42817	3.34766	3.43396	3.46107	3.93403	3.798	3.46037	3.38747	3.50037	3.4872	3.51484	3.48513	3.33506	3.56507	3.48961	3.48559	3.69475	3.42264	3.3462	3.39511	3.50932	3.5653	3.81162	3.49259	3.4404	3.33417	3.53119	3.54851	3.46457	3.45972	3.44298	3.39925	3.452	3.43906	3.70424	3.50084	3.85247	3.43729	3.45353	3.37416	3.37464	3.43396	3.68914	3.34914	3.98269	3.35536
TBC1D20	5.52937	5.88919	5.84547	5.85164	6.17518	5.71919	6.09853	5.87982	5.92547	5.92793	5.98973	6.2647	5.91926	5.74197	6.29645	5.68405	5.85141	6.06831	6.0515	5.7384	6.48459	6.16951	6.10586	6.39387	5.86527	5.74773	6.19842	6.014	5.88212	6.16803	6.81921	5.83801	5.87982	6.40407	5.97827	5.86614	5.90154	6.21813	5.96676	6.10903	5.93208	6.08823	5.96218	6.17189	6.39453	6.25042	6.30961	6.18237	6.48075
TET1	4.12777	3.53183	3.66861	3.49699	2.79792	4.66816	3.18671	3.79698	4.56549	3.76584	3.48961	4.41967	3.15756	4.51136	5.93779	4.1418	3.80597	3.26138	3.73022	3.15228	2.92285	3.1952	3.53183	3.21276	3.22403	3.1087	3.66351	2.80227	3.15963	4.00324	2.81348	3.68381	3.99844	3.26694	3.28235	3.11955	3.06547	3.0242	3.71291	3.21921	3.44208	4.31572	2.625	2.84218	3.40933	3.2938	2.68575	3.21097	4.11486
TET2	5.62598	6.02423	5.52072	5.49076	5.20218	4.92677	5.93269	5.20135	4.91307	5.73672	5.21575	5.42554	5.66411	4.8818	5.88968	5.20805	5.40406	5.5999	5.55134	5.27644	5.2275	5.21523	5.01162	4.87681	5.11923	5.51572	5.22891	5.63226	5.19783	5.11599	4.35723	5.77962	5.06666	5.34441	5.22269	5.05316	5.31724	5.48405	5.51782	5.27429	5.37635	5.6613	5.04846	5.60913	5.46427	5.30856	5.34921	5.27378	4.58326
TET3	5.24244	5.48836	5.12942	5.04143	5.73272	5.01831	4.78066	4.97928	5.2125	5.13624	5.20455	5.32864	5.29369	4.77169	5.54326	5.31896	5.10273	5.10356	4.96931	5.37562	4.99828	5.64367	5.63804	5.42477	5.08975	5.34945	4.94894	4.97957	5.18631	5.35337	4.51767	4.8885	5.30645	5.46748	5.46532	5.05856	5.2675	5.01566	5.31875	5.18012	5.37347	5.09024	4.95246	5.1645	5.10247	5.29759	4.97902	4.97411	4.98953
TFG	5.41763	6.17636	5.65436	5.92137	6.25443	6.30989	6.69392	5.75772	6.35443	5.82005	6.4656	5.68904	5.68378	6.14177	6.14931	6.15234	5.92058	5.78023	5.71251	6.32562	5.58042	5.58068	6.40521	6.25506	5.80948	6.41259	5.46477	5.65329	5.64977	5.34066	6.49674	6.3008	5.84464	6.05391	5.77513	5.88697	5.89869	5.81472	5.82428	6.11292	6.77493	5.81004	6.04078	6.11318	5.6159	5.52967	5.99152	5.37323	5.93517
TGFA	5.32706	5.47358	5.87953	5.25612	5.42582	5.83274	5.6652	5.33039	5.71474	5.9318	5.28147	5.81803	5.98948	5.24011	5.16183	5.59657	5.93779	5.29608	5.05064	5.03305	5.01131	6.32562	6.0323	6.04683	5.48998	5.94	5.36268	5.79895	5.48939	5.92161	6.00729	5.17098	6.14092	6.35597	6.12216	5.70319	5.1079	5.47697	5.18169	4.36119	5.44616	4.51602	5.45335	5.44951	4.67816	5.29238	5.46635	4.70969	5.79873
TH	3.26033	3.33878	3.22384	3.44543	3.31903	3.3224	3.21358	3.6448	3.78837	3.25079	3.2587	3.33547	3.30361	3.25122	3.31274	3.26508	3.32147	3.34704	3.3258	3.30769	3.33506	4.65566	3.26548	3.24184	3.28719	3.26138	3.31484	3.25666	3.27672	3.26352	3.30641	3.21055	3.6341	3.26204	3.29571	3.2938	3.35268	3.26717	3.32304	3.26097	3.27411	3.30598	3.22472	3.30552	3.25101	3.88628	3.27602	3.41579	3.30667
THBS1	4.94646	6.662	5.55444	5.79644	6.05973	7.94992	5.99893	7.47101	6.51736	6.74875	7.2705	7.34389	7.79416	5.82092	7.38874	6.31802	6.17944	8.03658	6.28497	6.4329	7.02206	6.23169	8.99603	6.80172	6.83959	6.14149	7.23605	5.92281	7.00078	7.0332	5.41086	7.00122	5.41628	7.39881	6.7779	7.14773	5.38703	7.9017	7.40221	8.25691	5.78247	7.79287	6.34253	5.86643	8.25931	7.01194	6.44034	6.45028	4.79079
THBS2	9.99121	11.3855	9.23822	8.17366	9.04992	12.5428	10.7974	11.9951	11.403	11.2949	11.0041	10.8935	11.3034	9.63523	7.66493	11.4596	11.2778	10.9421	10.8404	10.9373	10.3799	10.5558	11.9951	10.8033	10.2403	9.34465	10.7558	9.22631	10.8825	11.0421	8.8302	10.8773	9.38176	11.3939	10.4307	10.6	8.5597	7.95049	11.6474	10.4047	6.45939	10.354	7.24003	7.99868	10.7135	10.1894	8.90667	10.5342	4.47091
THSD4	4.50753	4.77066	4.78411	4.63371	4.70579	4.49775	4.37401	4.53724	3.98057	3.90111	4.26516	4.41772	4.19192	3.83061	3.33861	4.40761	4.14103	4.39629	4.34851	4.32172	4.35473	4.55682	4.04577	4.68282	4.5695	4.19087	4.18414	4.71262	4.50444	4.26348	3.90054	4.41544	4.49461	4.47682	4.31845	4.32957	4.52309	4.12059	4.80595	4.02971	5.01969	4.21735	4.40082	4.15233	4.02496	4.50366	3.97281	4.28957	4.21342
THSD7A	4.7349	4.96227	5.93439	4.66539	5.00965	4.90939	5.00558	5.38893	5.35383	4.2581	4.95005	4.54224	5.11761	5.92659	4.34485	6.35931	3.98166	5.96248	5.81303	5.66714	4.88311	4.33774	5.26091	4.57032	5.34843	3.46037	5.09082	4.97095	5.0466	4.86435	5.61535	5.63315	4.27205	4.38006	5.23926	4.31603	5.75881	4.4026	5.20724	6.67866	3.76559	5.99462	4.45626	4.7055	5.7359	5.43948	4.82181	6.11709	3.09849
THSD7B	4.77094	4.14709	4.01768	4.12005	4.27866	4.11042	4.1085	6.00668	4.45338	3.84341	4.2522	4.83118	4.51738	3.95846	4.17149	4.34458	5.00126	3.93809	5.00532	5.20271	3.70081	5.78755	3.9747	3.6381	4.75531	4.16145	4.51917	4.23332	4.65056	3.99869	3.90922	5.59461	4.85735	4.07939	5.35518	4.97095	3.9864	4.30439	4.5526	3.75517	4.07011	5.15453	4.75044	3.99747	4.68059	5.39108	4.29435	4.68947	4.25073
TMCC1	6.04683	6.38199	6.00152	5.57573	5.84332	6.28103	6.36303	5.9246	6.02759	5.88968	6.41388	5.72315	5.76878	5.48998	6.69107	6.3988	5.97651	5.87169	5.82223	5.99747	5.521	5.7035	5.89672	5.74061	5.59849	6.09122	5.74394	5.78784	5.81361	6.13621	6.57276	5.72968	5.69552	6.09763	6.17064	5.59878	5.67838	5.48433	5.67649	5.71603	5.30591	5.88432	5.43386	5.68797	5.50961	5.68738	5.30829	5.49203	5.41628
TMED10	9.47085	9.2845	9.31839	10.3432	9.20983	9.25609	9.28621	9.14844	10.4047	8.85793	9.1119	9.16359	9.06843	8.80205	9.48689	9.26279	9.09073	9.6396	8.97188	9.57527	8.97452	9.07146	8.80414	8.96198	8.99876	8.89442	8.81911	9.13174	9.02696	9.05432	8.37003	9.49469	8.91657	9.43915	9.12721	9.44078	10.1015	9.79463	9.48887	9.09955	8.70143	9.28095	10.0185	10.3432	9.03133	8.97452	9.75071	9.34814	10.0469
TMED2	8.89314	9.12278	8.08139	10.5386	10.4664	9.42657	8.31184	8.41076	10.0691	9.69498	9.13625	9.16214	8.88074	9.46258	10.9421	8.89555	9.1103	9.95878	9.26279	9.98226	9.79711	9.65819	9.95305	9.83362	9.27744	9.82861	9.83607	9.60417	9.47324	9.46677	10.3919	10.2546	10.0373	10.0946	9.87071	10.5558	10.3681	9.76558	9.76761	8.91518	9.8071	8.62152	10.6515	9.95582	9.87071	9.76761	10.8033	9.53543	10.66
TMED3	5.22318	5.14564	5.16154	5.469	5.20247	5.12113	5.38076	4.72591	4.82491	4.77569	4.82947	4.24033	4.71731	3.84475	5.04766	4.91418	4.43807	4.94183	4.76034	4.85611	4.72998	5.00155	4.87844	4.8361	4.91558	5.18537	4.70969	4.74653	4.5782	5.04253	5.41946	4.62921	4.85004	5.07611	4.69696	5.38971	5.54671	5.60836	4.75241	4.66005	4.38833	4.65106	5.80149	5.444	4.72591	4.68836	5.64258	4.63857	5.93604
TMED9	8.12781	8.5938	8.43938	8.51032	8.48973	8.44272	8.72631	7.99868	8.2045	8.06935	8.13481	7.92409	7.96037	8.37143	8.79859	7.75378	8.11416	8.20302	8.15188	8.21568	7.98937	8.18339	8.09771	8.3509	8.08819	8.42911	8.00151	8.21199	7.96941	8.3071	7.88586	8.05195	8.44821	8.64137	8.22168	8.441	8.43431	8.21339	8.20978	8.06051	7.40888	8.12447	8.31346	8.46371	7.90501	7.78801	8.43508	7.94245	9.04849
TMEM115	6.91572	6.45613	6.38768	6.23895	6.79841	6.61501	5.97594	6.41176	6.0149	6.46027	6.42501	6.33343	6.32843	6.56967	6.06804	6.469	6.5401	6.6246	6.36655	5.48646	6.56839	6.33497	6.66791	6.4276	6.82678	6.77828	7.0496	6.82197	6.65586	6.43745	6.98653	5.49715	6.5767	6.60015	6.44995	6.32752	6.28473	6.34892	6.90164	6.32908	6.86951	6.35167	5.81303	6.24545	6.77927	6.649	6.68348	6.69741	6.10267
TMEM165	5.86383	5.93576	6.00554	5.3608	5.76904	5.88807	5.93297	5.43544	5.64949	5.73539	5.57713	5.96464	5.99578	5.88919	5.53561	5.41062	5.72344	5.54806	5.58521	6.09033	5.37372	5.92765	5.58355	5.76112	5.46773	5.99723	5.49965	5.19563	5.7133	5.7252	5.40266	5.6608	6.11346	6.0323	5.95215	5.76265	5.38228	5.51113	5.79507	5.62169	5.35413	5.64949	5.66293	5.65623	5.54146	5.71725	5.03746	5.31359	5.65381
TMEM199	5.69305	5.90452	5.78247	5.62277	6.26524	6.16105	5.87115	5.76649	6.11742	5.9665	5.75207	5.96388	5.94089	6.09943	5.95016	6.02987	5.90261	5.76424	5.92901	5.84658	5.78533	5.77051	5.97827	5.99128	6.16512	6.21058	6.0926	6.59647	6.10701	5.90059	6.0521	5.7505	5.5782	5.76022	5.79311	5.63371	5.76965	5.67262	5.84386	5.97965	5.91515	5.75496	4.74766	5.39973	5.72549	5.84277	5.87953	5.98552	5.42446
TMEM258	10.6381	10.1758	10.3799	11.3939	10.8303	10.8773	10.7755	10.3837	10.8202	10.675	10.7089	10.0851	10.292	10.8876	11.0288	10.1894	10.7401	10.4873	10.4236	10.5133	10.5133	10.7401	10.7034	10.6095	10.4385	10.7861	10.4307	10.3365	10.5468	10.7508	11.2462	10.3103	11.1589	10.6381	11.2249	11.4596	11.2949	10.8303	10.5644	10.5856	10.1927	10.0748	10.9927	11.1218	10.5133	10.5599	10.8876	10.8202	11.8281
TMEM59	7.28119	8.22313	8.03735	8.40405	7.89843	8.28884	8.1539	7.88948	7.94604	7.67656	7.63061	7.87033	7.83821	6.75835	8.04603	7.19564	7.65222	8.03599	7.59657	8.23276	7.60135	7.39788	7.24594	7.4563	8.04134	8.01581	7.49871	8.21137	7.38047	7.19564	7.11892	8.42385	8.3319	7.48284	7.82484	8.02979	8.57025	8.28019	7.93483	7.6025	7.93283	7.84464	8.2388	8.36009	7.82967	7.71877	8.23524	7.85808	8.33426
TMEM97	8.28329	7.61696	7.7036	11.6818	6.95129	7.58849	9.10109	6.54758	7.27444	6.39719	7.05344	7.61644	6.50909	7.97065	8.32548	6.95896	6.88708	10.2372	8.26521	5.85272	7.95714	6.67428	7.46728	6.83488	7.2727	8.90792	7.81848	9.52692	8.29521	7.165	7.91082	7.27396	7.56402	6.62818	7.26033	11.0421	11.2174	11.2696	7.83515	5.12623	6.66162	6.45318	11.4696	11.7689	5.69925	7.82785	11.1733	9.55819	11.6937
TMTC1	4.94811	5.05856	5.33704	5.37816	6.74591	4.44136	6.30676	5.49277	5.09606	5.21226	5.49564	5.32525	5.57541	5.93517	4.53294	5.41036	4.8776	5.19731	5.69466	5.25121	5.40436	5.23149	5.92793	5.27508	5.5029	4.52219	5.46532	5.16271	5.06037	5.45005	4.52846	6.46248	6.15264	4.97311	6.08795	5.6985	5.20901	6.19209	5.17488	7.1839	6.08172	6.33563	5.96388	5.68133	6.54922	6.35167	5.7183	6.23748	5.95016
TMTC2	6.8112	7.59171	6.96549	6.38261	7.48439	6.511	6.67428	6.21291	7.15206	6.56167	6.68285	6.91074	7.13188	6.70393	5.62389	6.74296	7.10218	6.65757	6.5502	6.91799	6.31144	6.05575	5.82092	6.94006	6.89272	6.65453	6.59055	6.97949	6.52605	6.38547	6.61992	6.88635	7.34582	6.0155	7.07078	6.74907	6.47193	5.90842	6.81079	6.02641	5.93269	5.87485	5.57767	6.18933	6.6385	6.18349	6.259	5.78977	6.37485
TMTC3	5.79699	6.40343	5.62967	5.42865	6.08201	5.96077	5.39212	6.16803	6.03726	6.05859	5.69055	6.03175	6.13221	5.56562	6.59679	6.13132	5.6359	5.85547	5.71725	5.70407	5.47278	5.32496	6.23665	5.98302	5.45784	5.0339	5.79673	5.24456	5.47915	5.72831	5.56375	6.04155	5.43099	5.93123	5.47537	5.85908	5.59407	5.80948	6.24245	6.27463	6.00291	5.81921	5.28383	5.43182	5.86132	5.52046	5.21814	5.8751	5.21389
TMTC4	6.20578	6.06538	5.46853	4.95661	5.00071	5.75131	4.66593	5.31222	6.51642	4.96958	5.54348	5.17814	5.06085	4.96608	6.16375	5.14778	5.75743	4.99058	5.03796	5.87839	5.04093	5.46692	6.18541	5.34333	5.43708	5.01048	4.90286	4.70633	5.17959	5.36594	5.82863	5.14144	4.99649	5.10103	6.19291	5.33439	4.92785	4.96958	4.90556	4.77414	5.22804	4.43694	5.03229	5.11003	4.67971	5.079	4.89663	4.91113	5.39754
TP63	3.26118	3.28377	3.32873	3.15047	3.17153	3.21944	3.16814	3.21834	3.14968	3.16893	3.16832	3.15963	3.15107	4.08079	3.17106	3.32792	3.27542	3.14743	3.14499	3.16145	3.16931	3.31795	3.1691	3.19757	3.23175	3.18835	3.19818	3.24711	3.18554	3.22425	3.1404	3.16145	3.28807	3.14337	3.32432	3.23323	3.08978	3.10455	3.14063	3.21525	3.13553	3.15572	3.06095	3.22236	3.13534	3.29192	3.22596	3.1545	3.15208
TRAK1	8.17074	8.536	8.87503	6.46116	8.01006	7.58902	7.37819	6.89827	6.70005	7.29858	7.19086	7.6853	7.22148	6.31582	6.10701	7.95905	8.12098	7.05001	6.91611	6.78248	7.00711	7.18686	6.73766	7.62409	8.14044	8.77122	6.98801	7.43082	7.89843	7.58167	7.04071	6.67324	8.32465	7.06835	8.37467	7.45097	6.55523	6.20483	6.50123	6.15442	7.53269	6.79291	6.20847	6.44004	6.52243	6.83255	6.07581	6.48303	6.20224
TRAK2	7.96941	8.55651	8.24483	8.7057	8.07653	7.47152	7.6511	7.7886	8.11416	8.38137	8.23364	8.25841	8.44367	7.07357	8.03735	8.40405	8.19063	8.44992	8.38047	8.40405	8.03525	7.87532	7.57659	8.2396	7.56975	7.23425	8.07653	8.18482	7.91522	7.7959	7.00711	8.64357	7.99389	8.06794	7.44655	8.12447	8.64227	8.30171	8.76149	8.40488	8.37963	9.01439	8.00739	8.47608	8.19598	8.21722	8.17221	8.18025	7.94363
TRAPPC1	8.17736	7.29952	8.00817	8.10232	8.03114	7.41037	7.49556	7.87637	8.09833	8.12304	8.02377	7.3237	7.96618	7.3526	7.73158	7.14079	7.54895	8.14123	7.97733	7.46473	8.54661	8.52005	8.63454	8.38397	8.20155	7.88645	8.65641	8.14323	8.50501	8.57025	9.62638	6.79881	7.61972	8.39471	8.06727	8.23808	8.17366	7.56498	8.19656	7.49308	7.91462	7.95181	7.55427	7.52554	8.69597	8.69263	8.54777	8.19146	7.95264
TRAPPC10	6.23637	6.3453	6.26919	5.52445	5.58383	6.13737	5.51858	6.00099	5.71502	5.73081	5.91757	6.23637	6.31177	6.16951	5.65463	6.98614	6.15176	6.1219	5.92959	6.27123	5.98439	6.55584	5.51549	5.69876	6.30613	5.59768	5.64511	5.69439	6.02958	5.8627	5.53457	6.26524	5.89534	5.78333	6.27985	5.63563	5.94319	6.15027	6.22747	6.26556	5.93894	6.68578	5.7035	5.68405	6.14606	6.0788	5.12113	5.80617	5.6985
TRAPPC2	5.14861	5.02502	5.10439	5.06666	5.1427	4.89494	4.70181	4.93231	4.89244	4.96553	4.63828	5.1848	4.92982	4.63152	5.17841	4.9599	5.20828	4.96905	4.92703	4.91197	4.95351	4.98469	5.16713	4.9139	4.76649	5.03204	5.00261	5.13159	4.8135	4.89694	4.94477	4.75871	4.74607	5.22346	5.13244	4.95296	5.16575	4.72422	4.80155	4.95404	5.19212	4.85201	5.11375	4.95194	4.94529	4.90262	5.16741	4.80873	5.18012
TRAPPC2L	6.21356	5.96704	5.8405	6.00814	6.23809	5.94406	6.38636	5.84962	6.18427	6.31209	5.96189	5.90585	5.77231	6.62128	6.10153	5.90452	6.06317	5.81865	5.919	6.25866	5.98607	5.90288	5.67761	6.01432	5.91926	5.98193	5.87618	5.85736	5.65813	6.24337	6.47347	5.96787	5.85021	6.08545	5.90644	5.69552	6.28131	6.13045	6.13737	6.09064	6.18121	5.83417	6.22271	6.23205	6.18402	6.14994	5.87	6.12793	6.17817
TRAPPC3	8.58803	8.02851	8.12649	8.19433	8.13267	7.70787	8.34456	7.94141	7.75378	8.03735	8.07576	7.89909	8.02979	8.01777	7.62189	7.55601	7.58274	7.89843	7.96814	8.59777	8.03114	7.91907	7.59013	7.57659	7.972	7.82423	8.11881	8.3319	8.10722	9.87071	7.85163	8.35598	8.3509	8.42292	8.30086	8.09103	8.23276	8.12992	8.11881	8.12304	8.12649	7.96681	8.32128	8.22685	7.79768	7.91407	8.22901	8.3609	8.09238
TRAPPC4	6.91036	6.46402	7.03284	7.05344	6.96549	7.15822	7.14385	6.75867	6.93323	6.80026	6.24636	6.85567	6.65036	6.86296	6.4108	7.19829	7.18757	6.54693	6.59942	7.01071	6.63649	7.05304	6.46871	6.96862	6.92758	6.79327	6.82023	7.20662	6.61469	6.62094	7.36496	6.99121	6.85605	6.83851	7.0464	6.90011	7.02637	7.02083	6.83293	7.18257	6.90276	6.05326	7.11639	7.05603	6.59805	6.96434	6.47033	7.18757	7.03448
TRAPPC5	7.79112	6.90773	7.88283	7.48336	7.78494	7.70903	8.38984	8.1058	7.97464	7.93809	7.12983	7.22659	7.68478	7.49308	8.39793	7.37953	7.53886	7.44257	7.52599	8.05329	7.66981	7.90365	7.52128	7.80724	8.14615	7.41646	7.23425	6.70245	8.04394	7.19262	8.44455	7.86101	7.58436	7.52687	7.51622	7.18041	7.56827	7.94245	7.23905	7.22102	7.54489	7.86465	7.47915	7.38238	7.85685	7.78443	7.50822	7.88948	7.06835
TRAPPC6A	7.36688	6.94899	7.26736	7.9211	6.56537	7.22244	7.58274	6.22385	8.14615	7.06878	6.44541	6.79803	6.45487	6.8549	7.19048	6.40799	7.57805	6.83672	6.65518	7.31015	7.06955	6.72654	6.51389	7.66277	6.53383	6.64967	6.89861	6.79578	7.16837	7.27357	7.37237	7.04388	7.33083	7.01379	7.86101	7.51473	7.42451	7.37191	6.76961	7.0643	6.79841	7.13683	7.49814	7.0885	6.70897	6.75661	6.08624	7.0233	7.8853
TRAPPC6B	7.0154	7.24291	7.13641	6.83926	6.87107	7.682	7.16669	7.71137	7.65711	7.19784	7.19513	7.3553	7.72219	6.64765	6.64869	7.20185	7.48528	7.47308	7.35172	7.28891	7.31343	7.50822	6.91948	7.27813	7.15285	7.48227	7.39881	7.9103	7.1839	7.0059	5.56971	7.35172	6.98801	7.68427	7.14256	7.34631	6.86406	6.84472	7.65606	7.73748	6.7408	7.41081	7.41509	7.23382	7.20828	7.43726	7.75323	7.30688	6.50761
TRAPPC9	5.54645	5.73999	5.81194	5.7373	5.50081	5.50397	5.36873	5.39427	5.28778	5.31088	5.19429	5.12736	5.48324	5.18145	5.24456	5.83743	5.31798	4.95961	5.05711	4.80069	5.05345	5.5503	5.13827	5.48022	5.68266	5.29473	5.52291	5.41115	5.41973	5.76509	5.57658	4.84792	5.63343	5.20347	5.7102	5.4289	5.57435	5.64258	5.15887	5.28834	5.39212	5.42734	5.60836	5.25014	5.30699	5.43841	5.69	5.23801	6.02187
TRIM13	6.68716	6.91687	6.77857	6.8054	6.88708	6.55427	5.45784	6.48529	6.43655	6.28374	6.34496	6.4773	6.36449	5.6065	6.87069	6.62854	6.06568	6.2161	6.41014	6.85957	6.1481	6.50188	6.26496	6.3328	6.35502	6.11408	6.11069	6.32719	5.96218	6.34623	6.30552	6.59163	6.48886	6.17698	6.34961	6.21203	6.76289	6.40861	6.79881	6.49189	6.23809	6.58994	6.64471	6.61501	6.46465	6.45487	5.94593	6.59741	6.16074
TTYH1	3.7731	3.78443	3.72228	5.5841	3.72578	3.71541	3.70081	3.70654	3.71591	3.69501	3.70706	3.66328	3.69273	3.85568	3.76834	3.74333	3.70278	4.2859	3.91091	3.71968	4.43807	3.73517	3.71461	3.73911	3.71312	3.71869	3.74288	5.32213	3.73541	3.72372	8.18177	3.91676	4.2126	3.68203	3.71174	4.89036	5.4147	5.99603	4.80183	3.74905	3.73267	3.70475	5.59461	3.79928	3.73854	5.15781	5.38492	3.95738	5.59461
TUBA1A	10.7916	11.4418	11.1589	10.3291	10.845	10.8202	10.761	11.9641	12.4975	12.3665	11.705	11.1808	11.857	9.10276	9.89759	12.4975	11.1434	11.705	11.3301	11.2174	10.914	11.0949	12.1029	12.1601	11.6474	10.3606	11.5539	11.6937	11.5112	11.3477	10.0309	12.0823	10.761	12.5637	12.5637	11.6474	10.6335	10.6883	11.7562	12.5428	11.166	12.5637	9.95028	10.8349	12.1601	11.2696	10.6287	11.5335	9.85499
TUBA1B	10.2372	10.3026	10.5216	9.38515	10.5264	10.1824	9.68395	10.7813	10.2337	10.9804	10.9482	10.314	10.4579	11.0098	10.0309	10.7343	10.6647	10.4543	10.5003	10.1203	10.6	10.4959	11.0358	10.9421	10.7401	10.483	10.6982	10.5599	10.7135	11.0288	10.2001	10.4307	10.6244	10.8985	10.675	10.5003	9.90015	9.5375	10.5813	10.3365	10.2992	10.7187	9.14543	9.43232	11.0041	10.3681	9.59322	10.2236	8.84133
TUBA1C	11.871	11.857	12.1235	10.4747	12.3022	11.871	10.9373	12.3665	11.9336	12.7759	12.7536	11.9178	12.0288	12.6908	11.3398	12.3665	12.3236	11.6695	11.8849	11.7439	12.0125	11.9951	12.838	12.5834	12.3905	11.7689	12.1969	11.2949	12.1969	12.7953	11.9493	11.9641	11.9336	12.5187	12.715	11.5653	11.1081	10.8498	11.9015	11.6937	11.857	12.1029	10.2372	10.4198	12.435	11.7689	10.0781	11.4798	9.5974
TUBA3C	6.60681	6.80933	6.54793	6.42268	6.60113	6.82678	6.57342	7.12443	6.78178	7.16951	7.14037	6.70897	6.75867	7.38581	6.88606	6.85729	6.88188	7.01271	6.84247	6.46054	6.80433	6.83672	7.1223	7.048	6.98031	7.11476	7.22102	7.21144	7.0431	6.99883	6.78354	6.83782	6.81545	7.24993	6.8756	7.15285	6.31834	7.13227	6.84867	6.84437	6.68421	7.03965	6.82455	7.321	7.0823	6.81625	6.10877	6.75835	7.32329
TUBA4A	8.40315	7.94726	9.32549	7.11257	8.56919	9.5774	8.73271	8.9466	8.56453	8.95953	9.15886	8.83591	8.96076	8.75931	8.63036	9.29303	9.56225	7.75216	8.39224	7.76106	8.0626	8.72631	8.30259	9.34465	9.36433	8.92245	8.45649	8.93231	8.56664	9.35574	8.17295	7.88408	8.26986	9.23996	8.82693	7.95049	7.29344	7.2849	7.85029	8.19598	8.0513	8.13121	6.65132	6.98104	8.36755	8.09696	6.67248	7.7591	6.5319
TUBA4B	5.67786	5.14618	5.63641	6.094	5.52601	5.87953	6.1359	5.49933	6.08683	5.83305	6.09064	5.59738	5.86072	6.08113	5.85272	5.62516	5.89072	5.69525	5.42197	5.27109	5.36519	5.8391	5.46132	5.63168	5.71418	6.76857	5.64566	6.65518	5.70986	5.49513	6.08425	5.42916	6.21932	6.36504	5.99004	6.48273	5.34765	5.78533	5.67233	5.75021	5.74584	5.56209	7.02866	6.65692	5.49513	5.54069	6.40521	5.74744	7.94194
TUBA8	3.62142	3.65403	3.60779	3.86286	4.11655	3.69326	3.58435	3.60208	3.62653	3.61163	3.61426	3.61784	3.76633	3.55723	3.63098	3.62374	3.61669	3.61479	3.6343	3.60973	3.6319	3.83813	3.62653	3.62813	3.63076	3.56722	3.62462	3.62583	3.63332	3.6491	3.65257	3.58193	3.60378	3.59058	3.61693	3.61899	3.59779	3.70132	3.67852	3.64265	3.65689	4.25243	3.62559	3.63455	3.78515	3.6319	3.71337	3.59975	3.67164
TUBAL3	3.02675	3.1625	3.70881	2.95588	4.18083	3.02005	3.00061	3.03544	3.00526	3.03544	3.00428	3.03309	3.03192	3.05654	2.97796	3.03525	3.01266	3.02459	3.03845	3.02754	3.06984	3.05714	3.31401	3.78282	3.02892	2.95833	3.02277	2.94946	3.02972	3.04948	3.00881	3.0242	3.04009	3.00214	4.63399	2.99814	2.96267	2.91903	2.98765	3.03464	8.13691	3.03865	2.89749	2.90427	3.02912	3.03287	2.89859	2.99362	2.93213
TUBB1	3.18652	3.11159	3.17207	3.18517	3.15963	3.16795	3.45219	3.20633	3.13765	3.18276	3.14418	3.12341	3.15126	3.12549	4.10792	3.13841	3.13553	3.14418	3.12936	3.13476	3.0724	3.20129	3.17832	3.17975	3.53798	3.24418	3.18878	3.30531	3.16623	3.16291	3.19071	3.1339	3.14539	3.16544	3.13805	3.17423	3.21238	3.43556	3.16832	3.23219	3.14683	3.33353	3.08083	3.21642	3.32011	3.1325	3.37567	3.23443	3.30384
TUBB2A	8.27528	7.78038	7.9272	7.70029	7.94547	7.52394	8.3641	7.94604	8.2516	8.14401	9.16359	8.53121	8.33659	7.05265	7.32907	7.972	8.50317	8.17295	7.91842	7.82423	8.15682	8.25841	7.82308	8.86908	7.99511	8.54262	8.01992	8.26834	8.66268	8.09179	7.8616	7.92165	8.02657	9.01846	8.86021	8.10297	8.18835	8.47251	7.96157	8.71755	8.70999	8.61398	8.2045	7.9834	8.54175	8.08348	7.40367	7.85223	8.50229
TUBB2B	4.791	3.90845	5.164	4.45962	4.26794	3.33121	5.37899	6.45939	6.33217	4.52111	4.81064	4.55597	4.51799	4.20184	4.79079	6.29676	6.01686	5.22243	4.19113	4.64239	4.3787	6.72364	3.79485	4.21702	4.71287	5.02475	4.97021	5.63026	5.56831	5.64675	4.07812	5.36437	3.52507	4.29857	5.1151	4.71149	4.65809	4.29102	5.63891	5.59683	5.56016	5.79453	4.78797	4.11095	4.71395	5.3165	4.86126	5.60732	5.39189
TUBB3	8.95829	8.90667	8.99739	8.01649	9.23126	8.58069	9.04458	9.18076	8.73928	9.24624	10.0815	9.13923	8.8302	8.64765	8.49233	8.94393	9.07735	8.84503	8.91518	8.3666	8.96613	9.85754	9.67179	10.2656	9.39574	9.16359	9.34465	8.83804	9.7154	9.98835	9.78984	8.422	8.71445	9.92622	9.5974	8.67325	8.49327	8.46001	8.90287	8.88074	9.42657	8.95291	8.3501	7.74353	9.43061	9.39238	8.18109	8.72173	8.17295
TUBB4A	3.68203	3.34473	3.35799	3.53027	4.09003	3.40588	3.34494	3.3186	3.3228	3.45907	3.75391	3.31836	3.35799	3.37464	3.37522	3.3239	3.37803	3.37949	3.35912	3.3435	3.36202	3.30252	3.39532	3.39421	3.37416	4.40234	3.36483	4.89224	3.41348	3.35644	4.7648	3.37543	3.38533	3.34957	3.35622	3.47531	3.2616	3.8248	3.48982	3.37439	3.40885	3.40354	3.23551	3.61426	3.34977	3.35622	3.24571	3.36573	3.74486
TUBB4B	10.0851	9.65363	10.5301	8.65436	10.1333	8.95169	9.84341	9.43722	9.20484	9.78984	10.3837	9.55378	9.15146	9.77748	9.52692	9.69214	9.33256	9.30101	9.21743	9.27566	9.38698	9.9146	10.14	10.9559	10.1141	9.8814	9.56689	9.55378	10.2067	10.7187	9.8489	8.92749	9.78487	10.1589	9.95878	9.65158	8.94786	9.43397	9.04458	9.16499	10.3291	9.33421	8.98533	8.50047	9.56885	9.70281	8.42292	8.91777	9.04304
TUBB6	7.22062	7.5912	7.2763	7.32283	7.22521	7.29108	7.48572	7.62738	7.37377	7.49056	8.53311	7.03604	7.40982	6.03639	5.99603	7.18723	7.18257	7.80244	7.78553	6.83891	7.21368	7.12313	8.15973	7.41923	7.17822	6.47128	7.64122	7.14895	7.16024	8.16372	7.31197	7.24513	6.44389	7.39071	7.048	7.46429	7.02789	7.88469	7.77297	8.03525	7.51227	8.11076	7.74939	7.05932	8.24936	7.6964	6.94269	7.83091	7.33083
TUSC3	5.59821	5.28912	5.64312	6.74414	5.19676	5.86614	5.65891	6.71941	5.97991	5.84223	4.95491	5.62333	4.63707	4.0313	7.34241	5.39898	4.73877	6.65894	6.08399	5.86329	5.92632	5.15048	5.1553	5.5774	5.33439	3.87915	6.47258	6.93289	5.74145	4.54865	7.55065	6.24979	5.78705	5.01074	6.32276	6.09583	6.9473	6.4634	7.03924	6.31706	5.43626	6.5937	6.29308	6.00069	6.40521	5.9589	6.92546	7.03924	6.25626
UAP1	10.745	9.97895	10.5681	9.9116	10.4272	10.6429	10.729	9.20148	9.1103	9.47085	10.2001	10.2268	10.5681	10.1232	9.73572	9.19496	9.62874	9.40738	9.70509	9.73301	9.43556	9.5184	9.40911	9.55378	9.80957	10.2992	8.95953	9.03133	10.0373	9.16657	9.04151	9.81728	9.29131	9.37195	9.1103	9.52485	9.79962	10.2477	9.3059	10.1694	9.93246	10.0373	10.4543	10.14	9.91742	9.61977	9.56452	9.45072	10.1433
UBA1	6.78314	6.80433	6.70897	6.45028	6.60577	6.39814	6.44966	6.52209	6.49837	6.58047	6.57276	6.88414	6.9393	6.69566	6.34183	6.9283	6.67215	6.42854	6.54693	6.46087	6.74042	7.46824	7.0158	6.88152	7.06305	6.66096	6.86634	7.05111	6.67428	6.84093	6.94303	6.56007	6.96056	7.26821	7.55975	6.89566	6.40983	6.53157	6.6997	6.22778	6.51131	6.67215	6.39719	6.15588	6.81706	6.9578	6.56344	6.72508	6.87453
UBA52	12.5637	11.8281	12.6483	12.1969	12.6908	12.6908	12.3665	12.1235	12.9407	12.6908	12.4748	11.9493	12.6271	12.4127	12.7759	12.6483	12.7331	12.1235	12.1601	12.8185	12.0823	12.2398	12.044	12.2624	12.4975	12.5187	11.8849	11.7837	11.9951	12.9407	12.5187	12.715	11.9015	12.2398	12.3471	12.044	12.2398	12.2808	12.0288	12.4975	11.635	12.9604	12.1235	12.3022	12.3236	12.3665	12.0622	12.3471	12.3471
UBB	7.09639	6.6398	7.24863	7.75683	7.46915	6.9247	7.1223	7.12102	7.20229	7.26869	7.1421	6.90848	7.25434	6.75336	7.68587	7.23733	7.33128	7.37623	7.0451	7.61847	7.11639	6.82563	6.87332	7.21058	6.83739	7.44553	7.23686	7.38775	7.17407	6.85567	7.21758	7.6501	7.03361	6.92576	6.85271	7.47503	7.75159	7.47101	7.06547	7.26736	7.6317	7.29626	7.68252	7.8919	7.23905	7.10089	7.8418	7.32188	8.05838
UBC	13.1543	13.4714	13.6051	12.3665	13.575	14.1716	14.2027	13.7242	14.0023	13.7866	13.8558	13.3813	13.8925	13.5462	12.6271	14.3042	13.7866	12.8593	13.4714	13.2184	13.2426	13.4249	14.0715	14.1424	14.0715	13.7548	13.4714	13.1962	13.3813	13.6335	13.9309	13.2921	14.1057	14.0023	13.694	12.4975	12.3905	12.5428	13.2687	13.4035	13.4936	13.6051	12.2624	12.4748	13.5462	13.2184	12.4748	12.9407	12.1029
UBE2J1	6.82197	7.01863	6.16345	7.46387	6.75501	6.75011	6.67566	6.71514	6.72972	6.89498	7.01071	6.69291	6.89972	6.11207	7.33474	6.6586	6.54728	7.06471	6.73379	7.50226	7.02167	6.9393	6.87453	6.82894	6.59581	7.25608	6.86673	6.70046	6.81583	6.39485	6.19234	7.16584	6.34346	6.74727	6.72654	7.10428	7.42554	7.21801	7.10296	7.35812	7.80483	6.98274	7.63965	7.23218	7.04114	6.87636	7.31707	7.01741	7.80128
UBXN1	7.09898	6.7776	7.11806	7.45442	6.67397	6.72053	6.662	6.53356	6.63469	6.58994	6.70861	6.12251	6.60914	6.86445	6.59977	6.54489	6.80822	6.60515	6.59127	6.39358	6.7494	6.74759	6.58316	6.78894	7.12639	6.80574	6.62888	6.80933	6.77891	6.76785	6.82342	6.29739	7.17608	6.55124	6.79106	6.59477	7.17106	6.86913	6.68866	6.29064	6.83992	6.7776	6.66064	6.56255	6.62128	6.52861	6.97169	6.95815	7.38627
UGGT1	6.52762	6.63683	6.13857	7.05603	6.76251	6.24305	6.59977	5.77426	6.42666	6.30175	6.45968	6.45579	6.75121	6.28315	7.97668	6.39302	6.54953	6.32468	6.12594	7.03151	6.51131	6.73517	6.61302	6.67664	6.17545	6.55973	6.27707	6.4016	6.29276	6.5401	6.61373	6.4519	6.15775	6.61992	6.13336	6.78493	7.03999	6.6123	6.23637	6.06859	6.50909	6.33626	6.81812	6.83447	6.40983	6.1596	6.74296	5.9592	7.38286
UGGT2	4.92407	4.98528	4.75899	5.09194	4.95005	4.82924	4.35668	5.02774	4.86018	4.6469	4.83256	4.82358	4.76452	5.00126	5.0574	5.07666	5.09474	4.95378	4.64889	5.07666	4.43724	4.64208	4.87112	4.69449	4.60331	4.98581	4.58787	5.0293	4.52388	4.50168	4.86214	4.9117	4.44943	4.90074	4.67015	5.03362	5.07231	5.54121	4.79217	4.85304	4.36206	4.75421	5.65569	5.53014	4.64076	4.46842	5.23926	4.80124	5.41973
UMOD	3.50551	3.51129	3.50016	3.49452	3.43792	3.545	3.55476	3.40781	3.46132	3.42969	3.50976	3.49878	3.6343	3.60138	3.92599	3.46565	3.50551	3.49168	3.50841	3.59102	3.57716	3.50778	3.5062	3.49519	3.52669	3.47956	3.50976	3.43183	3.51439	3.50778	3.79327	3.61852	3.48604	3.47982	3.51527	3.45458	3.65564	3.77207	3.5166	3.51505	3.56582	3.67549	4.21342	3.84867	3.49972	3.53975	3.48829	3.53303	4.385
USO1	8.63454	8.65641	8.64049	9.81205	9.34465	8.65436	9.53962	8.89685	8.81801	9.32213	8.91777	9.21938	8.62257	8.6485	8.87944	8.44641	9.13625	9.25101	8.88321	9.42319	8.91657	8.92374	9.07284	8.92245	8.29833	9.01072	8.92374	8.75379	8.92502	8.72285	8.73594	9.11326	8.95427	9.69214	8.95041	9.61977	9.7154	9.32213	9.20148	9.07589	8.97188	8.93997	9.56225	9.83833	9.12422	9.05886	9.47719	8.94919	9.99466
VCAN	9.60203	10.3219	8.60634	8.25006	9.54937	11.2862	9.8814	11.8281	10.9987	10.4959	11.1733	10.2438	11.253	8.6674	8.01854	11.0421	11.3477	10.729	10.729	10.745	10.5813	10.9201	11.635	11.1733	10.5133	10.4424	10.9201	9.68133	10.7974	10.7343	7.8964	10.5644	9.71842	11.1508	10.8404	10.6476	8.11749	7.82609	11.2021	11.6818	6.15588	10.2773	6.32692	8.18835	11.5762	10.4307	8.35935	10.6559	5.02502
VCP	8.05981	8.78537	8.28555	8.41241	8.85793	7.75627	9.01186	8.28485	9.17624	8.34695	8.69263	8.25931	8.2516	7.82731	8.45158	9.20297	7.99801	8.53213	8.67232	8.43508	8.42118	8.38488	9.14236	8.52472	8.35427	8.36258	8.50139	8.57588	8.57685	8.41516	8.26669	8.11351	8.21568	8.14191	8.20669	8.37228	8.55651	8.2388	8.68637	8.52005	8.3319	8.73271	7.98465	8.48973	8.69711	8.39891	8.18921	8.2359	8.25931
VEGFB	6.40586	6.57	6.29159	7.15206	5.56147	6.64967	6.20759	6.76387	5.59461	6.71132	6.91867	6.29097	6.32023	5.73813	5.49301	6.33663	6.74759	6.89787	7.02446	5.82339	8.21871	7.8203	7.54839	6.62128	7.06584	6.33064	7.64676	6.54419	6.98577	7.48387	8.12037	5.82428	7.74696	7.38	7.51473	7.78379	6.45553	5.45487	7.05146	6.24279	5.61778	6.80858	6.97488	6.45456	7.65268	7.91272	7.97668	7.51384	8.11881
XXYLT1	5.31946	5.76534	5.55182	4.51182	5.66496	5.63257	5.46853	5.67786	5.23018	5.74226	6.07401	5.46024	5.90088	6.31735	4.84206	5.17157	5.54833	5.28626	5.57687	5.27508	5.79507	5.48971	6.74621	6.27928	5.3779	5.63942	5.88352	5.15582	5.8684	6.52605	6.28594	4.7228	5.2494	5.83274	5.49176	4.63007	4.47122	4.93548	5.48621	4.9199	4.93278	4.79898	4.98333	4.87223	5.99496	5.55003	4.73355	5.55903	5.06014
YIPF1	7.24513	7.82909	7.39931	7.17492	7.32145	7.63797	7.59812	7.56549	7.05689	7.61481	7.54387	7.30831	7.45875	7.02525	7.08064	6.18402	7.38823	7.23178	7.41179	7.51174	7.26736	6.76893	7.25859	7.02602	7.68639	7.25434	7.34904	6.98383	7.55109	7.11639	7.35582	7.18757	7.36404	7.35398	7.48018	7.51072	7.36168	7.27314	7.51876	7.31794	7.13468	7.33037	6.23262	5.50243	7.28309	6.94006	6.1583	7.20144	7.40473
YIPF2	6.51642	6.24337	6.32628	7.05644	6.59023	6.75192	7.29858	6.31485	6.66265	6.25506	6.53944	6.28013	6.35067	6.28716	6.58122	6.28345	6.56196	6.43137	6.35443	6.05771	6.38768	6.56774	6.22747	6.53157	6.5136	6.87256	6.73554	6.13452	6.27034	6.5345	7.44354	6.0623	6.94938	6.5097	6.48397	7.46728	6.98185	7.3664	6.36051	6.25658	5.86072	6.14338	7.36496	7.0704	6.35662	6.27341	6.95275	6.52605	7.96218
YIPF6	7.42501	7.56236	7.52646	7.68308	7.74534	7.36168	7.79166	7.64233	7.67145	7.32055	7.08684	7.58739	7.90113	7.20878	7.11013	7.54242	7.52228	7.26167	7.28846	7.76215	7.02083	7.37469	7.46096	7.50676	7.07686	7.15285	7.20185	7.45051	6.94861	7.38423	7.59171	7.50021	7.10428	7.42554	7.40523	7.15162	7.3706	7.43288	7.15073	7.27173	7.21758	6.98383	7.4615	7.50273	7.00711	7.09599	7.16879	7.30409	7.60511
YKT6	5.72741	5.8627	5.75334	5.8034	6.52405	7.2638	6.43873	6.20788	6.51485	6.42822	7.14298	6.5067	6.469	6.75121	5.43653	5.39783	6.01209	6.12447	6.20821	5.99066	6.20788	6.79508	6.85121	6.93142	6.29487	6.00729	6.75366	4.86323	6.43474	6.73208	6.91074	6.0791	5.87672	6.77354	6.43873	6.04569	5.73565	5.51352	5.79947	5.37562	5.96218	6.01882	6.00011	5.49905	6.14931	6.36449	5.92742	5.2217	6.45387
ZC3H12A	7.32861	7.05485	7.47814	3.96779	5.59329	6.63265	7.22332	6.47667	5.34041	7.13641	7.83213	7.20742	7.21758	6.34436	4.04857	5.58736	7.95975	5.84135	6.21058	6.15057	7.3673	6.66407	7.93877	5.65107	7.79416	8.39973	7.78729	6.42822	7.37623	8.90156	7.17778	5.67475	6.58729	6.74152	7.16879	6.47667	4.48265	6.06317	5.92604	4.06799	5.83631	5.63508	4.57506	4.66143	5.56349	5.97621	5.39055	5.40746	4.2807
[truncated: 3 more columns]
