# Supplementary material for: A glycosylation-related signature predicts survival in pancreatic cancer
Source: Aging (Albany NY). 2023 Nov 30;15(23):13710–37. doi: 10.18632/aging.205258 (PMC10756102; doi:10.18632/aging.205258)
Supplement: Supplementary Table 3 [file aging-15-205258-s004.xlsx]

## Sheet: Sheet1
Supplementary Table 3. GRGs expression profile of PC in GSE15471.
Gene	GSM388115	GSM388116	GSM388117	GSM388118	GSM388119	GSM388120	GSM388121	GSM388122	GSM388123	GSM388124	GSM388125	GSM388126	GSM388127	GSM388128	GSM388129	GSM388130	GSM388131	GSM388132	GSM388133	GSM388134	GSM388135	GSM388136	GSM388137	GSM388138	GSM388139	GSM388140	GSM388141	GSM388142	GSM388143	GSM388144	GSM388145	GSM388146	GSM388147	GSM388148	GSM388149	GSM388150	GSM388151	GSM388152	GSM388153	GSM388076	GSM388077	GSM388078	GSM388079	GSM388080	GSM388081	GSM388082	GSM388083	GSM388084	GSM388085
A4GNT	3.33286	3.05087	4.98618	4.82545	4.08272	3.76535	3.07003	3.1404	3.06745	3.28699	3.20696	5.77754	3.22864	3.25688	3.84918	3.12203	3.29337	3.50976	3.38511	3.74933	3.56815	3.40034	3.24773	3.39262	3.25831	3.91545	3.19539	3.92017	3.36726	4.55423	3.61375	4.71954	4.16389	5.32864	3.28082	4.39379	3.94258	2.83843	3.49878	3.1417	3.06277	3.54803	3.53906	4.34958	3.45434	3.54686	3.0973	3.3205	3.16642
ABCA2	4.60331	4.3211	4.21129	4.44723	4.18571	4.4241	4.564	4.45744	4.53724	4.26288	4.47152	4.21669	4.41292	4.5168	4.40648	4.67945	4.23305	4.65212	4.17878	4.44532	4.42937	4.47515	4.65031	4.51326	4.29711	4.43022	4.52957	4.32902	4.48181	4.50225	4.0936	4.51242	4.48047	4.43439	4.63287	4.76729	4.50722	4.46126	4.56463	4.60848	4.42629	5.05013	4.77783	4.97683	4.77619	4.92703	4.40398	4.85985	4.17257
ACAN	4.81859	4.54954	4.63428	4.60648	4.65132	4.57306	4.81987	4.80321	5.27378	4.55308	4.96014	4.79274	4.7877	5.10762	4.70662	4.55899	4.55707	4.70129	4.64406	4.50966	4.3982	4.9645	4.60546	4.6365	4.40082	4.59331	4.64266	4.6365	4.73705	4.69507	4.67971	4.64493	4.66759	4.42163	5.00903	4.77929	4.7349	4.49379	4.59657	4.65106	4.23975	4.86835	4.86297	4.75673	4.53637	5.20534	4.55761	4.84234	4.94954
ACTR10	9.70774	9.79235	10.0217	10.0722	9.8071	9.82861	10.1927	9.86262	9.7154	9.74313	9.88932	9.77497	9.9146	9.84593	9.58836	10.4047	10.0156	9.8814	10.0946	10.0127	9.96485	10.0127	10.2138	10.0781	10.1333	9.88394	9.95028	9.97034	9.64664	9.87071	9.96759	9.92327	9.76558	10.0127	9.90882	9.96485	9.84079	9.96759	9.9116	10.0527	10.0815	9.79962	9.75559	9.74837	9.91742	9.9146	9.55581	9.8071	9.63745
ACTR1A	6.29487	6.11318	6.1857	6.12625	6.06658	6.11833	6.54893	6.37392	6.48273	6.09519	6.32966	6.35566	6.36024	6.49779	6.18872	6.10903	6.32692	6.15775	6.07605	6.25537	5.93297	6.46528	6.18402	6.24636	6.2031	6.3587	6.17093	6.37957	6.31241	6.27149	6.44995	6.11709	6.23497	6.21695	6.39814	6.4516	6.33094	6.2346	6.36776	6.17636	6.08172	6.78139	6.63649	6.46812	6.66517	6.55843	6.03906	6.42597	6.26767
ADAMTS1	7.91138	7.80842	6.61899	6.71235	7.557	7.73281	7.48075	10.7974	9.70774	8.07286	8.60738	8.7088	8.93747	10.0127	7.85223	10.6838	7.75	7.68587	7.51384	8.06404	7.75627	8.47703	7.27813	7.0823	7.02602	7.32632	8.28397	7.79889	7.33257	7.42211	7.96559	7.05146	8.14469	8.25083	8.04675	6.85805	8.83591	8.53775	9.21276	7.34631	7.017	6.53096	6.63232	6.35167	6.5937	6.04319	9.58836	5.90261	10.0408
ADAMTS10	5.3771	5.15808	5.29039	5.2067	5.32652	5.45663	5.06637	5.39164	5.72801	5.30295	5.49203	5.06342	5.71919	5.54121	5.43128	5.2778	5.51068	5.76855	5.40051	5.9203	5.43786	5.54433	5.16627	5.33122	5.13853	5.73784	5.21145	4.89959	5.47511	5.11832	5.74823	5.35212	5.24769	5.34642	5.14564	5.17378	5.35155	5.32472	5.87783	4.98552	5.16425	6.69183	6.52993	6.60015	6.33563	6.12955	5.35977	6.79951	5.19072
ADAMTS12	6.26408	6.04804	6.25596	6.38859	5.87567	5.82685	6.33663	5.81921	5.00504	5.1553	5.70573	6.28838	6.10979	5.37869	6.33153	5.03691	6.20911	5.65194	5.97827	5.43919	5.32785	6.20668	5.66825	6.54386	5.82339	5.40406	5.7726	6.25967	5.90613	6.2031	5.60232	6.02669	5.59435	5.02957	6.5788	5.92137	5.72968	6.16631	5.7035	4.74274	4.671	5.07394	4.65592	4.6789	4.41455	4.77463	4.96772	4.74393	6.01577
ADAMTS13	4.31977	4.29347	4.63591	4.63454	4.20624	4.41802	4.53011	4.71316	4.69507	4.20679	4.3979	4.26658	4.39068	4.8135	4.42381	4.22395	4.46622	4.64973	4.4442	4.73604	4.37512	4.52634	4.66703	4.58898	4.27948	4.8085	4.48294	4.57083	4.68408	4.68557	4.82947	4.58954	4.55423	4.64266	4.53352	4.32288	4.6223	4.53812	4.72811	4.24277	4.36119	5.48672	5.33498	5.1084	5.37562	5.4206	4.17389	5.6065	4.40512
ADAMTS14	5.3706	5.11375	5.27973	5.5796	5.28226	5.37921	5.28462	5.17653	5.16183	5.10273	5.35131	5.62169	5.76965	6.02121	5.53457	5.0769	4.97683	5.19212	5.18683	5.21764	4.57306	5.57304	5.3294	5.63834	4.5782	5.30564	5.17814	5.31174	5.52992	5.28117	5.23298	5.13297	5.2865	5.25417	5.70291	5.41086	5.73703	5.51018	5.91696	4.75531	4.98898	5.37763	5.59657	5.27864	5.68766	5.69055	4.80155	5.69552	5.67709
ADAMTS15	3.9389	3.75491	4.06907	3.96115	3.975	4.1085	3.80004	5.29912	4.8939	4.05834	4.65592	3.85273	4.45536	5.2507	3.69501	4.79022	3.81719	3.64991	3.46833	4.34458	3.92832	4.90994	3.74803	3.95243	3.53534	3.96481	4.44917	3.76034	3.90868	3.70278	4.05954	3.96252	3.8088	4.06094	3.96339	3.96557	5.13572	4.2446	4.75591	3.71641	3.70783	4.03511	3.9401	4.17257	4.06742	4.01421	4.46443	4.09333	4.99297
ADAMTS16	4.054	3.85353	4.32319	4.13769	3.72124	4.0233	4.33307	6.12363	4.22869	3.68592	4.38979	4.04636	4.0789	5.92959	4.35696	4.22178	4.16711	3.74853	4.24987	4.15119	3.71461	4.93915	4.26928	3.56412	3.80573	3.80707	4.49946	3.66351	3.81113	4.39183	4.50582	3.76328	4.02002	3.72946	5.00211	3.97686	4.98983	4.85846	4.27728	3.37231	3.59808	4.32	4.4497	4.31457	4.70129	4.2726	3.82689	4.18389	4.38612
ADAMTS17	3.26331	3.46565	3.30941	3.44228	3.13785	3.30574	3.4375	3.44341	3.65355	3.55972	3.53623	3.42925	3.48032	3.18334	3.43118	3.53468	3.59879	3.36374	3.43013	3.42398	3.43055	3.39262	3.33838	3.42285	3.43792	3.63455	3.36001	3.28676	3.536	3.46433	3.77085	3.51814	3.46242	3.725	3.52137	3.58074	3.14881	3.51636	3.72022	3.77011	3.60878	3.84685	4.25327	3.80957	3.7959	3.8463	3.85353	3.98297	3.57051
ADAMTS18	3.87317	3.90474	4.25913	4.41187	3.72793	3.70332	4.04352	4.12437	3.8572	3.86944	4.17658	3.66718	3.99667	4.59569	3.9286	4.43724	4.01421	3.90767	3.91281	4.02576	3.80854	4.19029	3.9095	3.93322	3.85059	4.20926	4.02083	4.10435	3.78389	4.04494	3.87645	3.71846	3.91388	3.97714	4.39294	3.86705	3.77969	3.90845	4.06316	3.89247	3.73931	4.054	3.92758	4.02002	4.04467	4.31511	3.89042	4.12521	3.96804
ADAMTS19	2.97233	3.01484	3.15798	2.86801	3.10455	2.98253	3.08232	3.08759	2.86963	3.16269	3.05895	3.04546	3.02098	3.06966	3.10135	3.25223	3.00823	2.86431	3.18535	2.94544	2.89813	3.17261	3.07045	2.90114	3.16065	2.86384	2.91264	3.00939	2.99717	3.08105	2.94211	2.88633	2.75927	3.0027	3.08414	2.95118	3.0264	2.96267	2.89882	2.99541	2.90768	2.89389	3.00291	3.008	2.79971	2.8754	3.16167	3.08311	3.10135
ADAMTS2	7.34481	7.11476	6.56344	6.86484	6.57772	6.87597	6.81409	7.61593	6.63265	5.82946	6.62818	6.55395	6.91074	7.14557	6.99087	6.1219	7.00997	6.66031	7.0388	6.43323	6.61567	6.91867	5.93123	6.78248	6.55427	6.28806	6.72693	6.86219	6.58696	6.74152	6.06966	6.649	6.47193	6.21203	7.15162	7.18686	6.46716	6.87332	6.40373	6.60046	6.45613	5.16242	5.00126	4.41802	5.12277	5.24837	5.18376	4.92533	6.9294
ADAMTS20	2.71734	2.65193	2.90134	2.82252	2.70373	2.64152	2.59611	2.80805	2.68804	2.82979	2.74653	2.8401	2.72672	2.71179	2.69773	2.81178	2.74653	2.76354	2.67459	2.72071	2.86115	2.59817	2.51369	2.73923	2.64772	2.6358	2.57734	2.85981	2.65555	2.65193	2.67743	2.66158	2.73673	2.562	2.73788	2.80781	2.66906	2.65732	2.7143	2.75646	2.63452	2.73619	2.71304	2.68301	2.61893	2.6034	2.64605	2.69503	2.77015
ADAMTS3	4.73657	4.93768	3.47758	3.32196	3.23282	3.5117	3.62628	5.97885	4.37977	4.07011	5.24812	3.45907	3.94119	4.04857	3.24954	4.85523	3.71127	3.35245	3.8828	3.4461	4.53212	5.08437	3.61454	3.48628	3.66234	3.02157	4.60158	3.45888	3.38313	3.56089	3.269	3.91176	3.55104	3.89304	3.71617	5.12059	4.35442	4.20491	3.83468	3.88227	4.51081	2.52384	2.49266	2.61736	2.55849	2.63287	4.46622	2.80603	4.30577
ADAMTS4	4.10656	3.87587	3.80236	3.57961	3.90241	3.80394	3.86228	4.49975	4.08508	4.40708	4.00431	4.02519	4.25131	4.53183	3.82083	3.87857	3.52939	3.83678	3.86115	3.73517	3.49497	4.12464	3.70706	3.72578	3.6319	3.76607	3.91806	3.81237	3.67948	3.67214	4.0805	3.68045	3.9864	3.77767	4.09554	3.64029	4.05722	4.03801	4.37787	3.91229	3.46589	3.61064	3.75754	4.2414	3.9286	3.94927	4.47661	4.37921	4.64631
ADAMTS5	7.34241	7.33343	5.46052	5.40768	5.3255	5.37008	5.49148	6.81738	6.24364	5.00937	6.6586	5.89401	5.57687	6.85729	6.19291	6.53356	5.2275	4.63258	4.80436	4.70041	5.4349	5.59247	5.23688	5.26882	5.3825	4.23503	5.30536	6.02057	4.93687	5.85462	4.20438	6.25537	4.98813	4.67999	6.76638	5.69876	5.53961	5.47915	5.28491	8.15682	8.42992	3.8471	3.75339	3.7292	3.69743	3.61739	6.08172	3.66889	6.24245
ADAMTS6	4.34851	4.49604	4.93943	4.85958	4.37265	4.21039	4.65288	4.24086	3.86997	4.11177	4.09664	4.36091	3.81798	4.04779	5.07017	3.86972	3.75704	3.74958	3.91753	3.66377	4.55149	4.6741	5.0466	4.79187	4.22039	3.3437	4.24001	4.5664	4.37012	4.4166	3.62462	4.86553	4.07812	3.72764	4.90396	4.03405	4.18976	4.18083	3.71291	3.77409	3.91121	3.44867	3.11877	3.15798	3.43396	3.36202	3.81553	3.50255	4.66846
ADAMTS7	3.78809	3.96364	3.92414	4.0035	3.79773	3.87999	3.88472	4.00825	4.19484	3.64573	3.8503	4.05613	4.01794	4.07694	4.03801	3.74933	3.80029	4.01394	3.87538	4.08272	3.69446	3.93378	3.73517	4.09446	3.65806	4.25994	3.78236	3.88498	3.87831	3.90188	4.19402	4.01472	3.8598	3.96779	4.01339	3.8161	3.89981	3.92283	4.27866	3.99295	3.97121	4.59905	4.64378	4.46786	4.81006	4.99696	3.84021	4.67921	3.78191
ADAMTS8	3.98615	3.92599	3.92945	3.90767	4.03511	4.06633	4.37037	4.38006	4.45366	3.59198	3.93264	4.08846	4.54954	4.03461	3.91334	4.07501	4.4458	4.43611	4.16256	4.37372	4.34372	4.52388	3.6607	4.02947	4.17711	4.35919	4.73217	4.26462	4.14321	3.83115	4.56101	3.96197	4.61868	4.54637	3.84685	4.3451	4.43241	4.28454	4.31896	3.88364	3.8317	4.4458	4.15945	4.26078	4.32345	4.15367	3.74242	4.33804	4.01174
ADAMTS9	5.06454	5.31436	4.93994	4.94159	5.27973	5.35262	4.92044	6.27866	5.9162	5.68821	5.73456	5.27535	5.95605	5.97337	5.51495	5.51113	5.37869	5.10356	5.37036	5.17351	4.87525	6.05575	5.52731	4.73933	4.91447	4.94704	5.45364	5.42424	4.84567	4.71782	4.90582	5.25724	5.20643	5.31408	5.38308	4.80926	5.79588	5.37683	5.64312	5.58982	5.44589	5.17072	5.06937	4.90719	4.97496	4.7877	6.30776	4.51326	6.41044
ADAMTSL1	3.44475	3.57885	3.45331	3.53689	3.44146	3.47198	3.64862	4.0019	3.58457	3.4491	3.6989	3.54734	3.48305	4.0535	3.43995	4.06827	3.56388	3.47823	3.65689	3.4173	3.54874	3.89857	4.17761	3.41284	3.62605	3.32993	3.62678	3.5577	3.48448	3.73709	3.43078	3.50482	3.55904	3.43204	3.75364	3.71819	3.7398	3.76486	3.50976	3.43995	3.36981	3.38789	3.31401	3.32893	3.38983	3.18773	3.54477	3.23896	3.71337
ADAMTSL2	4.16256	4.0365	4.47237	4.40398	4.80902	4.78095	4.19803	4.92267	4.45484	4.39715	4.43669	3.99484	5.15177	4.17389	4.92785	5.06752	5.56147	4.9018	4.77929	4.99879	5.78075	5.058	3.95629	4.32817	4.95603	4.94081	5.2515	4.81687	4.95194	4.61159	4.59707	5.61833	4.80381	6.04945	4.37622	6.09492	4.15833	4.45456	4.62816	4.07192	4.16633	5.20534	4.96288	4.67267	4.87628	5.09967	4.29461	5.424	4.20651
ADAMTSL3	3.93141	4.13463	4.55843	4.52903	4.03484	4.16633	4.89747	5.23298	5.54591	4.59788	5.0852	4.56013	4.80648	4.95934	4.5507	5.7102	5.1459	5.26482	4.93713	5.31062	5.51521	4.71149	4.0365	3.98027	4.8793	5.38466	4.71149	4.4802	4.22204	4.31767	5.44951	4.96148	4.94704	5.47642	4.63173	5.20271	4.53011	5.08975	5.08804	4.25161	4.31869	5.51495	5.44799	5.89809	5.91595	5.82064	4.96905	5.48912	4.505
ADAMTSL4	5.42197	5.2195	4.91362	5.15857	5.10634	5.25827	5.28626	5.65134	5.45145	5.47697	5.83524	4.77897	5.26451	5.83052	4.88123	5.59632	5.11145	4.90504	4.71395	4.65106	5.13673	5.84168	6.04134	4.86639	4.82409	5.11542	5.31007	5.49076	6.03376	5.44828	5.03823	5.26694	5.00425	4.84178	5.18063	5.27535	5.91696	4.89494	5.12653	4.92267	4.90719	4.38006	5.28383	4.80902	4.75374	4.97847	5.09226	5.22964	6.64531
ADAMTSL5	4.1967	4.0805	4.11977	4.18039	4.30884	4.15007	4.14372	4.20156	4.71954	3.98561	4.2649	4.03207	4.34537	4.30711	4.30055	3.92153	3.85925	4.41998	4.01394	4.52634	4.01039	4.08164	4.42655	4.39688	4.03461	4.72706	3.99951	4.21669	4.24651	4.38583	5.33255	4.11515	4.10408	4.41694	4.40289	3.91064	4.3363	4.02576	4.61187	4.10356	3.99484	6.10183	6.17338	5.75283	6.35103	5.99004	3.99373	6.13885	4.26318
AGER	3.62462	3.49404	3.52019	3.704	3.50482	3.49834	3.74486	3.50735	3.83787	3.59432	3.75859	3.41886	3.57983	3.4808	3.3228	3.59003	3.38599	3.72603	3.27498	3.83034	3.69222	3.70783	3.40379	3.68461	3.36658	3.68045	3.60758	3.4722	3.67497	3.78215	3.4284	3.53729	3.54264	3.5663	3.73686	3.61254	3.80931	3.53492	3.77969	3.71055	3.80957	4.06799	4.37428	3.93862	4.18217	4.27433	3.41476	4.26794	3.58682
AGRN	6.18181	5.89157	5.65891	5.77995	6.02669	6.34218	6.5107	5.68849	6.23838	5.23404	5.75307	5.65784	6.1466	6.07517	6.12006	5.40692	6.06342	6.38576	5.88067	6.39332	5.96438	5.78591	6.14248	6.09792	5.67347	6.3529	5.88183	6.17575	6.05916	5.88635	6.37239	5.86104	5.86502	6.36655	6.04516	5.78618	5.7437	5.94562	6.37702	5.38151	5.25097	6.81377	6.74621	6.70112	6.56937	6.60613	5.14916	6.86673	5.46159
ALG1	5.64395	5.98099	5.59122	5.30295	5.41145	5.50961	6.20337	5.18399	5.30371	5.54619	5.62725	5.34282	5.26882	5.20982	6.04461	5.46477	5.2708	5.36719	5.34227	4.93578	5.54247	5.55263	5.44589	5.81749	5.7437	5.79367	5.65329	5.74197	5.69876	5.9048	5.56647	5.60071	5.44244	5.71225	5.55471	5.73081	5.83052	5.49101	5.15426	5.6402	5.64258	5.72371	5.69055	6.08399	6.19695	5.24721	5.18945	5.91014	5.42507
ALG10	3.798	4.13301	3.79852	3.70834	3.57384	3.58725	3.53048	3.43055	3.13861	3.6583	3.48765	4.11095	3.35141	3.48671	3.9389	3.3512	3.23443	3.27829	3.452	3.34558	3.54662	3.5216	5.20372	4.34485	3.80394	3.34558	3.46705	3.61852	3.42639	3.51929	3.45972	4.06398	3.55147	3.39925	3.36332	3.61852	3.42377	3.54686	2.9731	3.85668	3.84893	3.1539	3.24976	3.18985	3.28353	2.99576	3.50327	3.20568	3.25101
ALG11	8.01649	7.99632	8.18109	8.11478	8.29913	8.24111	7.52067	7.68252	7.7096	7.9584	7.56236	7.82308	7.90294	7.94141	8.04813	8.18109	7.93218	8.08671	8.17669	7.89779	8.13343	7.81783	7.59171	7.76684	8.02851	7.95117	7.70083	7.9584	8.14401	8.25607	8.04468	8.20155	7.83936	8.02657	7.77634	8.2261	7.85427	7.82484	7.65928	7.90033	7.88948	8.04134	8.02583	8.10297	8.26521	7.87465	7.87751	8.06537	7.84235
ALG12	5.6803	5.86726	5.9307	5.86949	5.91221	5.91874	6.15893	5.80455	6.00875	5.78164	6.00959	5.9589	6.0743	6.058	6.02925	6.11069	5.92487	5.94433	5.85878	6.35028	5.70122	5.80837	5.59279	6.21518	5.67626	5.97479	5.97304	5.72257	6.01777	6.19291	6.38231	6.14488	5.96133	6.10586	6.15203	5.89869	6.06001	6.01126	6.16861	5.8846	5.77367	6.11472	6.37362	6.37269	6.50155	6.68647	5.82223	6.74844	5.86812
ALG13	6.19051	6.18814	6.09492	6.21638	6.10903	6.23982	6.39543	6.54211	6.27065	6.26268	6.4516	5.97566	6.17122	6.14606	6.04404	6.45613	6.03288	6.15711	6.34997	6.35786	6.22959	6.36147	6.3266	6.41108	6.04945	6.47478	6.27866	6.03906	6.11709	6.11742	6.11684	6.41288	6.34066	6.50123	6.28473	6.46087	6.46591	6.37798	6.26767	6.45553	6.26171	5.63804	5.96104	5.96335	6.12566	5.87618	6.51131	5.95215	6.34066
ALG14	5.28226	5.27214	5.30511	5.54671	5.43812	5.47487	5.68133	5.46427	5.66293	5.50446	5.40517	5.75639	5.74637	5.01705	5.51808	5.30189	5.73243	5.25799	5.43207	5.68485	5.43041	5.38727	5.04009	5.32293	5.32652	5.46532	5.17867	5.53784	5.25612	5.57189	5.89672	5.27031	5.57713	5.59039	5.30453	5.35181	5.14347	5.55444	5.63992	5.20724	5.0737	6.80318	6.95742	6.85567	7.07936	6.72508	5.26065	6.31363	5.39838
ALG2	6.38021	6.36592	6.17093	6.34218	5.98018	6.10297	6.09314	5.94877	6.52243	6.17454	5.93779	6.13942	6.33184	6.2372	6.04078	5.96412	6.06317	6.27551	6.02832	6.33725	5.9076	6.07971	6.10209	6.23169	5.95127	6.49711	5.95605	6.09976	6.06831	5.9524	6.75155	5.94562	6.32908	6.39692	6.30047	5.91418	6.28652	6.14994	6.44109	5.81953	5.96704	7.2621	7.32412	7.29721	7.2705	7.34066	6.02121	7.48387	5.95579
ALG3	7.27128	6.7622	7.02248	6.64562	6.91501	6.76183	6.92024	6.58994	6.69633	6.89306	6.75561	7.34481	6.72094	6.71031	7.86524	6.47159	6.63162	7.06263	6.44584	6.7359	6.37181	6.5097	7.34151	6.86187	6.91723	6.57373	6.64562	6.75226	6.91723	6.82342	7.321	6.90238	6.87597	6.99486	7.08893	6.59127	7.04153	6.53742	6.86371	6.68034	6.46248	8.29682	7.46195	8.15756	7.61051	7.48183	6.728	7.69865	6.76183
ALG5	5.14805	5.08624	5.06835	5.18895	5.22293	5.39754	5.32448	5.0143	5.4658	5.15608	4.92677	5.32652	5.08595	4.73933	5.24091	4.94674	5.24693	5.05937	5.23125	5.47944	4.89171	5.03014	4.96014	5.31303	4.95632	5.54487	5.01678	5.25503	5.38624	5.18145	5.60967	5.03204	5.40543	5.2348	4.99696	5.04766	5.04688	5.12196	5.37763	5.02802	4.85492	5.86585	6.36624	6.22181	6.5533	6.46027	5.23801	6.14311	4.99031
ALG6	7.37237	7.61272	6.97212	7.00277	6.73693	6.83524	7.64621	6.50871	6.66096	7.53216	7.09258	7.28673	6.90011	7.15863	7.12814	7.36496	7.21368	7.22613	7.31836	7.21097	6.59679	7.05737	7.10798	6.88376	6.83817	7.08474	7.02826	7.1707	7.00393	7.07978	7.03532	6.46871	7.05449	7.06625	7.00393	6.67831	7.11892	7.086	6.86445	7.30137	7.06795	6.92331	7.02367	6.69357	6.89538	7.49205	7.09122	6.62061	7.1303
ALG8	7.49976	7.51622	7.80128	7.81607	7.48811	7.28261	7.78992	7.0968	7.43236	7.62572	7.57512	7.83031	7.31618	7.53526	7.51823	7.45347	7.41411	7.86282	7.49608	7.6078	7.38823	7.51676	7.61376	7.99868	7.85223	7.66596	7.89501	7.46429	7.45249	7.62516	7.34531	7.87878	7.68308	7.95264	7.4916	7.61972	7.72686	7.59013	7.82245	7.25352	7.24724	8.22313	8.49415	8.45649	8.47079	8.28635	7.21676	8.04134	7.38337
ALG9	6.03175	6.27149	6.10466	6.22299	6.11121	6.01717	5.8405	6.31144	6.37575	5.84493	6.00554	6.35502	6.23394	5.71082	6.36418	6.47874	6.21058	5.96026	6.40252	6.31994	6.27831	6.17037	6.33032	6.24071	6.13857	6.33878	6.14282	6.46402	6.15118	6.29064	6.69813	6.23692	6.30304	6.46747	6.14904	6.17279	5.98744	6.07344	6.19234	5.91726	6.07374	7.18804	6.91233	6.97169	6.94938	6.89048	6.29807	6.92331	6.0323
AMDHD2	5.09255	5.54913	5.13904	5.32731	4.9612	4.85523	5.36519	4.89224	5.39998	5.20165	5.5237	4.51825	5.24115	5.70986	5.30952	5.19967	4.79353	5.2144	4.93358	5.18453	4.92212	5.84741	5.34254	5.59934	5.22293	4.81801	4.90773	4.66396	4.88653	5.23956	5.10022	5.16498	4.94448	5.03204	5.35627	4.80183	5.14193	5.12702	4.9645	5.46717	5.52183	5.52914	5.74692	4.94109	5.98686	5.70319	4.86863	5.86698	5.25799
AMFR	5.09689	5.03334	6.40343	5.90866	5.33757	5.2575	6.04598	5.78275	6.2167	6.01267	5.17188	5.93011	6.18121	5.99723	6.36385	5.81777	5.89185	5.25827	5.78134	5.03362	6.4634	6.50429	6.30931	5.28027	5.1313	6.37513	7.01115	5.44722	6.17367	5.35627	5.54247	6.45996	6.56038	5.29862	5.21303	6.52269	6.02784	5.47642	6.36024	5.15313	5.26806	6.47096	5.88968	5.85079	5.65381	5.31359	5.87458	6.4217	5.72288
ANK1	4.17736	4.0983	4.23786	4.29048	3.99558	4.01869	4.01579	4.03291	4.10768	4.14654	4.03866	4.13024	4.03097	3.97015	3.99721	4.01637	3.92545	4.16633	3.86676	4.05893	4.13024	3.95684	4.06123	4.02163	3.89089	4.36711	3.85492	4.13958	4.12059	3.90845	4.06316	4.3696	4.04185	4.26377	4.07555	3.97203	4.08618	3.84947	4.10187	4.11628	4.13379	4.30083	4.26928	4.39946	4.37292	4.48697	4.36711	4.4621	3.98324
ANK2	4.75044	4.97957	4.14954	4.07748	4.11042	4.15035	3.96364	6.89827	5.57411	4.71475	5.8973	4.426	4.51486	6.52927	3.70204	5.75131	4.62552	3.73879	4.01124	4.23919	4.71316	5.01048	4.00726	3.72603	4.24059	3.75441	5.32267	3.79042	3.82057	3.87721	3.63381	3.89698	4.32141	4.00112	4.22591	4.50225	5.46692	4.73463	4.715	5.90347	5.90613	3.45069	3.31105	3.18276	3.1339	3.03766	5.35383	3.26717	5.8714
ANK3	5.13297	5.24721	5.35518	5.2945	5.28254	5.36847	5.20952	5.60758	5.65329	5.82037	5.20879	5.68927	5.45279	5.31875	5.06037	5.77962	5.7359	5.52601	5.74394	5.74145	6.24603	5.19967	5.09935	4.85735	5.3779	5.80236	5.079	5.44349	5.35518	5.14324	5.66575	5.72628	5.45862	5.87458	5.00635	5.77936	4.95462	5.00635	5.36646	5.42942	5.43626	5.73511	5.77484	5.71447	5.53618	5.50422	5.40824	5.45005	5.39055
ANKRD28	7.09639	7.07641	6.90465	6.92905	7.1796	7.1765	6.82678	9.3059	8.07426	6.95129	7.63231	7.45929	7.92165	8.71841	7.34389	7.98465	7.32861	6.92576	6.96969	7.38676	7.02483	7.60355	7.27528	7.61162	7.0059	7.71694	7.39633	7.02714	6.86746	7.4294	7.09469	7.26957	7.23001	7.07559	7.37776	6.82378	8.08751	7.29903	7.69535	6.84289	6.74907	6.93749	6.98031	7.03571	7.18439	7.17407	7.69699	7.03448	7.68918
APOB	2.94606	2.94606	2.90581	2.86227	3.05202	3.06018	3.07084	3.22472	3.13014	3.12978	3.06726	7.542	2.83822	3.93322	3.09319	3.19266	3.87974	3.05223	2.95292	2.98132	2.99597	3.05457	3.0435	2.98888	2.90027	3.08616	3.8991	3.0489	3.10977	3.0242	3.10585	3.89222	2.96594	2.83354	3.22323	2.90855	3.02258	3.07462	2.95199	3.25369	3.1539	3.0435	2.94502	2.92476	2.98947	3.17503	2.82563	3.04233	3.21525
APP	9.85183	9.64664	9.6421	9.52923	9.57971	9.17787	8.92749	9.5164	9.3273	9.33589	9.62205	9.61091	9.83362	9.68133	9.34465	9.42319	9.74313	9.39574	10.0656	9.43915	9.75559	9.12422	9.61736	9.51206	9.42852	9.49112	9.55581	9.44259	9.05163	9.40533	9.74837	9.55819	8.99177	9.43556	9.69753	9.73065	9.18235	9.30252	9.86262	9.62638	9.46677	9.85995	9.47719	9.89442	9.5044	9.60637	9.61312	9.54937	9.35206
ARCN1	7.14037	7.048	7.10558	7.31484	7.2415	7.30635	7.34671	7.64837	7.8213	6.95275	7.30963	6.98461	7.49709	7.55601	7.08149	7.54635	7.34814	7.44952	7.14941	7.65268	7.46674	7.37109	6.9096	7.24952	7.09964	7.59974	7.41743	7.18644	7.45776	7.41835	7.77405	7.43779	7.38286	7.53316	7.42114	7.64621	7.30409	7.32457	7.73221	6.94861	7.05379	8.42385	8.42992	8.25388	8.28019	8.35853	6.87069	8.39304	7.35076
AREG	6.21552	6.23637	4.53042	4.56296	5.27378	5.15993	6.74185	7.11476	4.87303	5.65029	4.91856	5.59407	5.81663	5.23224	4.93548	5.19676	4.31539	4.962	4.0155	4.63317	5.07853	5.29634	7.13867	5.29527	5.55747	4.40147	6.1583	5.05038	5.47278	4.93146	3.83305	4.34235	5.36743	4.60303	4.65756	4.5461	6.15863	5.86502	5.11624	3.99348	3.89247	3.54966	3.35476	3.65377	3.50932	3.40693	6.95352	3.39329	6.45418
ARF1	7.7735	7.62948	7.74647	7.71074	7.46963	7.55267	7.6317	7.69031	7.8853	7.60835	7.64066	7.65381	7.72803	7.71931	8.00668	7.45489	7.6078	7.85286	7.38423	7.62572	7.47452	7.47552	7.44454	7.61051	7.85427	7.91907	7.52067	7.64949	7.69913	7.24811	7.81425	7.71989	7.86524	7.58221	7.62139	7.64014	7.81142	7.48439	7.7096	7.557	7.43236	8.08964	8.11076	8.17366	8.37312	8.01119	7.47814	8.2785	7.67973
ARF3	8.40315	8.32771	7.99063	8.10232	8.00877	8.07576	7.62088	7.85223	8.16453	7.99741	8.08474	8.00416	8.24254	7.88107	8.14323	7.62787	8.11967	8.33426	7.91138	8.13968	7.73507	8.15539	7.8604	7.65268	7.7591	8.19656	8.22033	8.10793	8.09893	8.12238	8.00817	7.98667	8.00352	8.00352	7.92785	7.88352	7.98527	7.89373	7.93218	8.35935	8.29134	7.91973	7.96618	7.90033	7.9272	7.98737	7.78208	7.94992	8.14401
ARF4	10.8498	11.0758	11.2778	11.3398	10.8498	10.9201	11.5877	10.855	10.9373	10.1962	10.729	10.8825	10.7861	10.5173	11.0098	10.354	10.5644	10.761	10.8498	10.845	10.9373	10.9373	11.4509	10.855	10.914	10.8498	11.1955	10.8773	11.1081	10.6936	11.0491	11.1881	11.0098	10.8202	11.5016	11.1014	10.9086	11.1508	10.8143	10.1333	10.3365	10.9259	10.8716	11.0225	10.9866	10.9866	9.84593	11.0041	10.8143
ARF5	7.26915	7.25989	7.47452	7.42749	7.41556	7.40612	7.83996	7.39788	7.59013	7.32998	7.56713	7.23816	7.74534	7.71074	7.47152	6.82528	7.39386	7.56027	7.46523	7.69134	7.48336	7.58794	7.11806	7.35437	7.66981	7.5971	7.58386	7.54337	7.57659	7.58587	7.73092	7.61696	7.48957	7.70671	7.21497	7.37722	7.53526	7.45006	7.61108	7.28351	7.37776	8.00817	8.0772	8.09959	8.12447	8.19356	7.24471	8.25534	7.58167
ARFGAP1	6.38425	6.31115	6.29308	6.44196	6.34157	6.40131	6.85305	6.36115	6.61165	6.05242	6.20668	6.18402	6.37425	6.46402	6.5348	6.37181	6.18402	6.53915	6.09639	6.58505	6.23665	6.70467	6.45222	6.50761	6.43077	6.61501	6.67633	6.76111	6.45646	6.78825	6.51835	6.36776	6.3328	6.49413	6.73009	6.47066	6.57276	6.49674	6.90922	6.19416	6.23048	7.18932	7.13641	7.0154	7.19436	7.15654	6.14123	7.17196	6.30175
ARFGAP2	5.24642	5.22216	5.42301	5.23045	5.21094	5.18246	5.42685	5.28058	5.48488	5.32757	5.29862	5.2294	5.40297	5.65918	5.26451	5.18537	5.12301	5.30829	5.23328	5.55237	5.34197	5.21867	5.39922	5.38813	5.27006	5.53377	5.24667	5.39268	5.41973	5.51704	5.48861	5.28935	5.09194	5.35792	5.30699	5.32839	5.39684	5.2192	5.39783	5.28278	5.34147	5.66293	5.66964	5.8169	5.76399	5.66186	5.36464	5.97368	5.22138
ARFGAP3	9.46862	9.48303	9.54747	9.84341	9.14844	9.3906	10.1112	9.69999	10.1728	8.94527	9.10871	9.48689	9.91742	8.95427	9.5864	9.06702	9.31504	9.53345	9.47085	9.77748	9.04304	9.35003	9.03565	9.79463	8.50501	9.89205	8.94272	9.19341	9.99466	9.56885	10.4579	9.23996	9.49469	9.65363	9.34465	9.17932	9.17154	9.36256	10.1232	8.99177	8.8702	10.6559	10.9866	11.0626	11.0892	10.9681	9.38874	10.8143	9.16359
ARFGEF1	6.12447	6.29308	6.36024	6.49935	6.57945	6.67106	6.19668	6.23048	6.21518	6.17367	6.05299	6.51766	6.17251	5.98277	6.03836	6.11181	6.22929	6.38829	6.34313	6.1872	6.35225	6.19494	6.31582	6.55427	6.55363	6.41354	6.81991	6.37208	6.41388	6.05391	6.36178	6.43077	6.35786	6.54693	6.12162	5.87458	6.27707	6.28899	6.53096	6.30521	6.28315	6.21813	6.39663	6.4378	6.33153	6.14994	6.13533	6.27248	6.13423
ARL6IP1	10.2583	10.8876	10.9559	11.1145	11.1014	11.2174	10.6793	9.77748	10.0815	10.4464	10.6559	10.3365	10.2103	10.0815	10.7755	9.86262	10.1232	11.1218	10.4704	10.5599	10.9927	10.1364	10.4385	10.6838	11.1589	10.9621	10.7699	11.2174	11.2778	10.5599	10.7235	11.233	10.8773	11.1434	10.5045	10.7861	10.0722	10.3763	10.5173	10.6335	11.1434	10.4787	10.3464	10.4917	10.5723	10.5513	10.6381	10.1046	10.0591
ARSB	3.98242	4.00295	4.07249	4.00242	3.86676	3.70357	4.08618	3.8917	3.87587	4.03291	4.17791	3.91942	4.03207	3.73709	3.88884	3.70983	4.106	3.80347	3.93213	3.68174	3.70154	4.16314	3.71641	3.81361	3.88472	3.68893	4.02971	3.83813	3.6979	3.76985	3.81744	3.80183	3.89222	3.60308	4.11949	3.97923	4.00587	4.03021	3.55347	3.86447	3.90922	3.65759	3.50415	3.90684	3.62886	3.70805	3.95321	3.6657	4.31738
ASGR1	4.09528	4.40082	4.14765	3.75779	3.95821	3.76328	3.93786	4.32929	4.18361	4.05215	3.75609	3.66836	3.62537	4.14765	3.91414	3.57811	3.76148	3.38747	3.84606	3.80236	3.57245	4.28725	4.78037	3.43441	3.73854	3.61545	4.25044	3.50415	4.50698	3.53375	3.5757	3.66396	3.91994	3.47022	3.97015	3.58435	4.02163	3.98269	3.47982	3.81499	3.98433	3.86857	3.59338	3.9343	3.40781	3.44085	3.681	3.58099	4.27458
ASGR2	4.70994	4.57109	4.45394	4.31539	4.4963	4.44047	4.5854	4.53549	4.87786	4.65319	4.51109	4.47041	4.82521	4.76871	4.52846	4.54897	4.61298	4.40845	4.22754	4.64406	4.21896	4.43897	4.4695	4.22071	4.35499	4.2126	4.70855	4.5	4.36347	4.34097	4.77169	4.23097	4.52445	4.4633	4.50664	4.33967	4.78066	4.55929	4.46443	4.40001	4.36318	5.05375	4.90804	4.83693	5.29634	5.30671	4.79491	4.73055	4.87844
ATP6AP2	8.16041	8.15539	8.40315	8.61398	7.87394	8.21722	8.26284	7.91462	8.13622	7.84287	8.05526	7.74121	8.04342	7.97398	8.07932	7.79472	7.98096	8.10793	7.9158	8.27773	8.00471	7.97398	7.94992	8.3692	8.01063	8.33111	8.03452	8.03382	8.1512	7.7725	8.01509	8.06794	8.13481	8.02722	8.34125	7.90501	8.20229	8.27296	8.13481	7.97529	7.96748	7.98162	7.99741	7.9211	7.96287	8.006	7.82609	7.88706	8.14469
ATP6V0A2	4.41967	4.45715	4.40708	4.32288	4.61785	4.48842	4.211	4.50366	4.28481	4.59331	4.52525	4.47971	4.33089	4.23591	4.4107	4.32458	4.32051	4.24198	4.3083	4.13878	4.33497	4.42793	4.1623	4.17494	4.2231	4.16523	4.56244	4.26984	4.22724	4.14981	4.01282	4.28642	4.37977	4.24846	4.23753	4.43022	4.49524	4.23919	4.07163	4.56433	4.52445	3.94499	3.92102	3.98218	4.1877	3.81361	4.81717	3.94741	4.33194
ATP6V1A	8.92627	8.97327	8.54452	8.63659	8.4878	8.52749	8.46001	8.37228	8.63659	8.5778	8.50404	8.59777	8.76474	8.61215	8.50953	7.89779	8.58803	8.72631	8.57411	8.96198	8.3509	8.57588	8.83252	8.6465	8.42465	8.53421	8.48507	8.76677	8.58803	7.78208	8.63547	8.45253	8.69263	8.52749	8.77122	7.98805	8.64137	8.63252	8.75931	8.95041	8.8302	8.25462	8.53962	8.50047	8.44821	8.54777	8.55651	8.61571	8.77008
ATP6V1E1	9.42852	9.3594	9.15453	9.10871	9.10585	9.14844	8.96076	8.96925	8.83359	9.37553	9.17471	9.03277	9.31319	9.28977	9.258	9.09073	9.38698	8.80956	9.19823	9.1182	9.04458	9.12721	9.32213	8.73167	9.26454	8.76786	9.22301	8.87503	9.28977	8.84976	8.89314	9.00668	9.04591	8.87503	9.15453	9.19972	9.15453	9.01573	8.93352	9.40336	9.13625	8.92245	8.7818	8.77592	8.72052	8.5938	9.1438	8.64567	9.341
B3GALNT2	5.05238	5.16575	5.27697	5.12032	5.04392	5.02023	4.92872	5.42139	5.29138	4.6589	5.09967	5.0681	5.20643	4.98494	5.34414	5.22318	4.95661	4.71897	5.08595	5.1084	4.84288	5.0691	4.79677	4.99407	4.93204	5.29939	4.9812	4.94287	4.64944	4.97386	5.5999	5.10609	5.00101	5.02824	4.86323	5.01398	5.08066	4.85304	5.1635	5.00903	4.93465	5.83939	5.87397	6.01432	5.76855	5.72492	5.05478	5.91335	4.94209
B3GALT1	2.89643	2.72375	2.79347	2.83637	2.80832	2.73814	2.88718	2.68301	2.86801	2.77494	2.7828	2.82252	3.01944	2.84286	2.6599	2.77996	2.79398	2.96913	2.68513	3.01702	2.78538	3.00214	2.77522	2.87926	2.76756	3.11621	2.72523	2.89106	2.84661	2.90404	3.34058	2.72464	3.03609	2.90194	2.77757	2.85634	2.68202	2.74983	2.9141	2.82738	2.83658	3.23109	3.10178	3.23443	3.15287	3.13014	2.72187	3.15047	2.83868
B3GALT2	3.14295	3.17651	3.38073	3.4713	3.30166	3.53929	3.07045	3.63098	3.14661	3.06403	3.25244	3.23571	3.16419	3.52068	3.13628	4.73604	3.5663	3.24894	3.61808	3.47531	3.69148	3.49259	3.06984	3.27783	4.21586	3.42593	4.03073	3.46354	3.21218	3.04849	3.16044	3.39305	3.73022	3.51837	3.19681	3.48126	3.21358	3.44146	3.15734	3.31628	3.64966	2.80508	2.92498	3.35078	3.27829	2.91369	3.03968	2.9266	3.2087
B3GALT6	5.26722	5.26778	5.15582	5.09581	5.33651	5.25588	5.4289	5.34091	5.38893	5.20696	5.1994	5.05561	5.36027	5.26982	5.18453	5.18453	5.18867	5.06112	5.15453	5.1812	5.20191	5.48884	6.06372	5.1835	5.13703	5.10192	5.45279	5.29473	5.1727	5.15048	5.13673	5.15808	5.00785	5.27618	5.21523	5.37899	5.25697	5.29734	5.04608	5.26585	5.23452	5.39838	5.41848	5.75078	5.62831	5.67786	5.34466	5.7015	5.16242
B3GAT3	5.49489	5.53784	5.39427	5.3078	5.46455	5.469	6.03995	5.3177	5.44851	5.3719	5.56294	5.53696	5.48022	5.6159	5.80922	5.4331	5.45064	5.53433	5.43041	5.53645	5.39998	5.7183	5.8339	5.57849	5.53513	5.55105	5.50104	5.42005	5.61915	5.96162	5.73108	5.55496	5.36	5.47537	5.85141	5.58469	5.61321	5.64424	5.62725	5.34197	5.38466	6.19354	5.70208	5.87593	6.0871	5.5659	5.29115	5.91041	5.57513
B3GLCT	5.15206	5.1645	5.12173	4.95404	5.2353	5.30699	5.25177	5.54591	4.91935	4.95661	5.16377	4.79382	5.26264	4.50048	5.49148	5.00344	4.85611	4.54224	4.81687	4.82545	4.7877	5.36743	5.29759	4.79783	4.82576	4.70522	4.63707	5.0829	5.58604	5.01238	4.0483	4.82606	4.74215	4.64944	5.23505	5.43434	4.87987	4.791	4.70941	5.32785	5.1459	4.87193	4.42824	4.39294	4.33194	4.38636	5.05209	4.33167	4.86044
B3GNT2	6.01825	6.19209	5.87593	6.1675	5.96077	6.18206	6.69291	5.68378	5.99603	6.17881	5.85962	5.8254	5.99523	5.49327	6.16375	5.56619	5.65492	5.95947	5.61563	6.16196	5.83999	5.96438	6.13477	6.31081	5.67896	6.25354	5.84277	6.23779	6.28899	5.93547	6.36898	6.04183	5.99723	5.98193	6.49873	5.78247	6.01126	5.97048	6.25198	5.87199	6.05884	6.34997	6.56937	6.72582	7.03027	6.93063	5.95156	5.71677	5.90371
B3GNT3	6.40767	6.28838	6.7914	6.90238	6.89121	6.88049	7.1578	5.61321	6.71298	6.19494	6.13014	7.24003	6.34746	6.32719	6.91189	5.89783	6.46248	6.98309	6.20788	6.31706	6.76961	5.97535	6.76009	7.97464	7.37421	7.08315	6.61603	7.12355	8.23808	6.71171	7.01975	7.28031	6.75192	7.12775	7.07896	6.50356	6.33913	6.14725	6.87939	5.44323	5.69	7.65829	7.76163	7.53676	7.48075	7.50972	5.47435	7.66762	6.0794
B3GNT4	4.92533	4.68582	4.87112	5.17735	4.8495	5.0769	4.80816	4.94866	5.4038	5.08949	5.08949	5.0838	5.15608	5.21145	5.04899	4.58869	4.85089	5.24269	4.79079	5.04227	4.87731	4.62417	4.92124	5.15704	4.67999	5.10869	4.87087	4.87303	5.0134	4.75871	5.43919	5.0372	4.67127	4.8901	4.94733	4.95351	4.9844	4.72591	5.36898	4.67183	4.73821	5.79222	5.83631	6.10183	5.7102	5.77832	4.90773	5.72403	5.02209
B3GNT5	5.83358	5.94851	5.85631	5.89648	6.24245	6.39814	6.09033	6.00668	5.95432	5.45736	5.69084	6.26829	5.98805	5.50472	5.94796	5.20558	5.57513	5.80532	5.58604	5.78304	5.52127	5.6057	7.71302	5.72656	6.02213	5.7848	5.65941	6.14369	5.95215	5.78247	5.15677	5.55634	5.88432	5.67896	5.41522	5.23956	5.72087	5.60445	5.37008	5.34414	5.23428	4.3211	4.5919	4.59874	4.3696	4.43163	5.14667	4.2712	6.32812
B3GNT6	4.14628	3.96481	4.44389	4.37372	4.10656	4.15612	4.56126	4.15395	4.17389	4.06179	4.33194	4.56101	4.14154	4.33112	4.19746	3.91914	4.08133	4.13905	4.11746	4.11401	4.0424	3.98941	4.15119	4.18682	4.51545	4.64604	4.08325	4.35555	4.17821	4.45133	4.2449	4.20268	4.21281	4.34593	4.55149	4.50315	3.99187	4.04185	4.22979	4.17469	3.89673	4.77414	4.83634	4.68635	4.73846	4.97281	4.34757	4.60044	4.03156
B3GNT7	4.92843	4.68913	5.36594	4.86154	5.33181	5.14167	4.66513	4.7405	4.82789	4.89494	4.83234	5.09416	5.20507	4.91254	4.90286	4.59509	4.93358	5.0826	5.08174	4.64463	4.79187	4.86895	5.20643	4.77118	4.85201	5.0466	4.57058	4.97902	4.92649	4.96092	5.09502	4.91773	4.82999	5.34869	5.27214	4.76034	5.09553	4.62335	4.94348	4.87303	4.70413	5.09991	5.16425	5.89701	5.87034	5.21998	4.87844	5.15097	4.86863
B3GNT8	4.7744	4.49325	4.76899	4.61758	4.73631	4.70467	4.65031	4.38335	4.93856	4.37622	4.84453	4.93797	5.05856	4.89929	4.47181	4.44015	4.61638	4.627	4.5274	4.97523	4.48294	4.52686	4.77094	4.5507	4.4486	4.48551	4.43694	4.60674	4.70129	4.70011	4.86407	4.82789	4.40761	4.50315	4.76509	4.55042	4.61493	4.67999	4.51271	4.68463	4.76899	5.27405	5.29583	4.98065	5.22243	4.9588	4.38335	5.2507	4.7349
B3GNT9	6.19695	6.06742	6.56774	6.27095	5.89893	5.93011	6.0717	6.72012	5.75307	5.41173	6.42949	6.27149	6.02213	6.40041	6.13452	6.65692	6.38893	6.02154	6.57609	6.04975	6.48817	6.35502	6.36272	6.11121	6.10436	6.02318	6.12129	5.65056	6.45222	6.65414	5.25932	6.57913	5.90261	5.88009	6.65996	6.90922	6.22418	6.77254	5.93694	6.02987	5.71945	5.91983	5.88863	4.36347	5.3255	5.62754	5.27163	5.5508	6.29552
B3GNTL1	4.82817	4.67676	4.86863	5.09112	5.01678	5.07748	4.97715	4.68891	5.0102	4.60935	4.94529	4.63152	4.77596	4.91826	4.92922	4.81568	4.83421	5.01994	4.64047	5.06961	4.81774	4.94025	5.05289	5.0205	4.63036	4.94977	4.95005	4.71449	5.41659	5.13648	4.82065	4.69755	4.96014	4.87815	5.03014	4.81957	4.90045	4.98227	5.14805	4.56153	4.64324	5.50607	5.3825	5.31119	5.32109	5.12918	4.7812	5.49076	5.08496
B4GALNT2	2.76383	2.97548	2.71797	2.94192	2.94502	2.96768	3.02157	2.95712	3.31087	2.98354	3.03287	2.71674	3.10828	3.06707	3.02972	3.23838	2.92409	3.14661	3.19414	3.19681	3.20252	3.01227	2.64844	3.12283	2.63377	3.10013	2.94746	3.17521	3.2398	3.05937	3.36863	2.92937	2.84883	3.12264	3.19394	2.75149	3.17586	3.11458	3.33222	3.20673	3.1339	3.27692	3.35644	3.9878	3.38291	3.60452	2.99541	3.22767	3.06944
B4GALT1	6.18845	6.13192	5.74282	5.51216	5.73052	5.49564	5.54806	6.19668	5.92843	5.94934	5.83718	5.76022	5.94958	5.90032	5.98277	5.64048	5.70461	5.60393	5.73405	5.77914	5.50771	5.75384	5.83222	5.97134	5.50744	5.75104	5.771	5.51378	5.49933	5.5774	5.72257	5.65838	5.72741	5.57798	5.83858	5.4824	6.13885	5.95374	5.86868	5.78784	5.77342	5.7015	5.61072	6.00495	5.82779	5.34171	6.2263	5.36488	6.16512
B4GALT2	6.59679	6.49995	6.57741	6.11438	6.31706	6.3196	6.84578	6.51867	6.67732	5.88919	6.28564	6.29426	6.58186	6.60015	6.45773	6.04835	6.42397	6.56669	6.33249	6.60914	6.27341	6.29459	6.7452	6.04804	6.05094	6.45742	6.63503	6.34157	6.51259	6.55124	7.10798	6.26888	6.30421	6.61373	6.50724	6.54353	6.42696	6.39358	6.68941	6.0018	6.03995	7.9057	7.52911	7.81199	7.51676	7.29952	5.70573	7.39292	6.17698
B4GALT3	5.19862	5.18537	5.27056	5.20427	4.92624	4.95851	5.27482	5.16211	5.37661	5.02161	5.05209	4.99649	5.19241	5.33465	5.25446	5.13187	5.02298	5.35291	4.89959	4.98732	4.99269	5.02802	5.22448	5.12893	5.14067	5.03555	5.2507	5.14727	4.98703	5.2528	5.18323	5.3255	5.15962	5.04794	5.19967	5.09663	5.55134	5.1117	5.18584	5.27919	5.32132	5.60099	5.63257	5.74061	5.78562	5.45385	5.30165	5.86527	5.09967
B4GALT4	7.0035	6.97331	7.98737	8.22685	8.08751	8.32622	8.13192	7.58331	7.26957	7.20267	7.44206	7.75748	7.43338	7.19564	7.95049	7.18351	7.57462	7.72982	7.94194	7.63628	7.85623	7.48668	7.48488	8.12992	7.70849	7.7892	7.40221	8.30408	7.90113	8.75379	7.71635	8.31027	8.18258	7.99063	8.01509	8.24111	7.66099	7.93998	7.52228	6.89972	6.9013	7.5454	7.79359	7.85623	7.95776	7.78494	6.84833	7.82845	7.36774
B4GALT5	8.18401	8.11749	8.81801	8.92133	8.59275	8.83359	8.84742	8.7057	8.42385	8.30563	8.41782	8.82156	8.75479	8.32386	8.57318	8.22759	8.6884	9.35574	8.50139	8.31027	8.60738	9.0979	9.79463	8.83252	8.9466	8.1258	8.36837	9.36623	8.85308	9.55581	7.77973	8.21646	8.57978	8.32386	8.52659	9.26279	7.98989	8.34379	7.90957	8.58704	8.62749	7.19436	7.35766	7.0464	6.8883	6.56669	8.515	7.07603	8.58803
B4GALT6	4.37541	4.63939	4.45105	4.51707	4.55014	4.62033	4.09141	4.26462	4.03207	4.127	4.02083	4.74419	4.20024	3.91806	4.23361	4.45626	4.29799	4.02893	4.29019	4.127	4.58214	4.30607	4.59077	4.45338	4.37592	4.269	4.414	4.48953	4.32902	4.11177	4.11715	4.38418	4.25864	4.28316	4.21427	4.36005	3.89751	4.34987	4.00511	4.35863	4.33221	3.66811	3.53513	3.4938	3.48604	3.61852	4.01579	3.51907	4.24846
B4GALT7	6.04516	6.1228	6.23895	6.0794	6.11654	6.14177	6.64412	5.78453	6.05005	5.7677	6.03012	6.0791	6.02023	5.96731	6.56038	6.0671	6.13014	6.31582	6.0149	6.16403	6.03288	6.16923	6.25658	6.66864	5.87087	6.02343	6.10354	5.86752	6.06083	6.58729	6.11069	6.28899	6.15442	6.14606	6.08915	5.99893	6.17518	6.05061	6.0788	6.00152	6.13192	6.48	6.45255	6.47193	6.54626	6.63613	5.8927	6.45807	6.086
B4GAT1	5.51163	5.42167	5.58355	5.57304	5.5812	5.56043	5.64208	5.57411	5.9569	5.20507	5.56404	5.47057	5.32267	6.09492	5.29039	5.777	5.51137	5.54146	5.62996	5.87593	5.69168	5.36569	5.39581	5.33498	5.5539	5.72628	5.59122	5.4289	5.5577	5.57902	5.8781	5.77484	5.51378	5.95776	5.53835	5.64539	5.43895	5.51406	5.991	5.45663	5.42606	6.67996	6.80318	6.82455	6.84544	6.9096	5.35463	7.14647	5.42477
BCAN	4.03348	3.91334	4.22645	4.1572	3.98218	4.12362	4.12005	4.01525	3.94145	4.13516	4.14654	4.30134	4.27512	4.23417	4.13848	3.97786	3.99667	4.35753	4.0564	4.25485	3.96914	4.01394	4.201	4.1289	3.99295	4.2262	3.9889	4.127	4.29461	4.20352	4.31603	4.08079	4.15587	4.25677	4.20268	4.02708	4.15535	4.06151	4.24817	4.08532	3.98057	4.73382	4.5779	4.55393	4.81568	4.6365	4.03319	4.39466	4.02785
BET1	7.82731	7.94073	7.85223	7.84586	7.83325	7.85918	8.12037	6.94976	7.60135	7.43485	7.27444	7.41696	7.26167	7.31658	7.48859	7.6886	7.45537	7.60191	7.682	7.82308	7.53269	7.19436	7.49259	7.4706	7.46627	7.86101	7.41128	7.32907	7.28846	7.19478	8.38984	7.76106	7.75567	7.93483	7.82083	7.30221	7.56549	7.89779	7.86101	7.84965	7.97788	8.79406	8.85651	9.06296	9.05163	9.10871	7.1765	9.00119	7.16539
BET1L	5.8314	5.73672	5.65056	5.79481	5.55418	5.63026	6.1875	5.80369	6.04917	5.82198	5.83246	5.75185	5.82428	5.81087	5.99152	5.98948	5.70517	5.9392	5.53041	5.7934	5.5812	5.64566	5.51572	5.65994	5.94877	6.00378	5.79007	5.85244	5.79976	5.75992	6.09792	5.9145	5.70068	5.8254	5.8314	5.41738	5.72681	5.71526	6.04569	5.72885	5.55105	6.55843	6.41388	6.86187	6.71867	6.57276	5.68627	6.79106	5.57389
BGN	10.0781	10.0498	9.47719	9.48491	9.61513	9.68395	9.56885	9.86522	9.6421	8.21568	9.92032	9.10276	9.88394	9.69214	9.68133	9.16359	9.96759	9.69498	10.1141	9.49469	10.1855	10.1333	9.06843	9.27566	9.70281	9.341	10.0883	9.44078	9.56885	9.62394	9.15288	9.94752	9.19173	9.16359	10.288	10.2477	9.71023	9.89759	9.3906	10.1824	10.14	7.31658	7.12728	7.33615	7.83444	7.34582	7.28846	7.75973	9.63069
C1GALT1	7.06835	7.25774	8.21568	8.25083	8.01777	7.96748	7.8882	6.16284	5.99435	7.27675	6.90696	7.2159	6.17367	6.29128	7.16154	6.84204	5.97337	6.73275	6.45968	6.16226	7.44553	6.34591	7.02045	7.65057	7.52128	6.59679	7.16197	7.27219	8.45253	7.2504	6.59977	8.19356	7.59479	6.87219	7.53782	7.41556	6.59406	6.9081	6.46027	7.21544	7.23303	5.1754	4.75476	5.55928	5.37427	5.39136	7.09558	4.85611	7.00314
C1GALT1C1	6.13336	6.16044	6.41259	6.31457	6.43907	6.40101	7.07978	6.30713	5.71225	6.33663	6.15057	6.2903	5.96757	5.91956	6.38358	6.38055	6.30047	6.09639	6.1583	5.98869	6.26023	6.20605	6.29521	6.19467	6.40736	5.95518	6.03317	6.15234	6.68348	6.4519	5.86785	6.33663	6.28685	6.08256	6.3532	6.16162	6.29097	6.17279	6.13097	6.43717	6.33371	6.12508	6.35443	6.00814	6.18691	6.00407	6.18003	5.86299	6.01238
C1GALT1C1L	3.44363	3.63952	3.56276	3.61375	4.2414	3.88653	3.68045	4.1225	3.60736	3.55996	3.99456	3.4751	3.90216	3.75462	3.77358	3.97714	4.08899	3.20736	3.7842	3.63952	3.9197	3.80158	3.41107	3.9136	3.58145	3.5927	3.66643	3.70983	3.72124	4.1883	4.12803	3.798	3.80824	3.75391	3.59058	3.68259	3.6233	3.76125	3.65355	3.17671	3.18964	3.48942	3.48057	3.70154	3.49972	3.83007	3.08916	3.39574	3.65471
CA4	4.13741	3.66671	3.72424	3.89382	4.20977	3.98993	3.85593	4.13848	5.8366	3.99923	4.17761	3.99667	4.72673	4.12464	4.47122	4.73877	5.13077	4.89415	5.16985	5.87115	3.9527	4.05923	3.74361	4.25425	4.29174	5.1084	3.5508	4.21615	4.00669	4.12195	6.10617	4.49831	5.0596	5.25827	4.00112	3.52556	3.85899	3.99696	5.25177	3.90845	3.79167	6.82715	6.76387	6.50871	6.49022	6.10979	4.64406	7.01379	4.40648
CAD	4.82576	4.87357	4.83284	4.96581	4.78742	4.89959	5.00048	4.84736	4.63345	4.95462	4.84343	4.80902	4.82208	4.58436	4.72944	4.8331	4.95581	4.85229	4.80514	4.74077	4.88486	4.97204	5.15097	4.96063	4.65132	4.61298	4.98923	4.85611	4.83025	4.8661	4.60275	4.88283	4.76756	4.83662	5.1103	5.00504	4.99432	4.85385	4.82521	4.87279	4.8885	4.88019	4.3363	4.39896	4.6822	4.38224	4.85278	4.88072	4.81859
CALR	8.73167	8.46651	8.21267	8.15539	8.37395	8.10946	8.45732	8.30408	8.2045	8.37467	8.39224	8.72285	8.45158	8.14123	8.43508	8.24567	8.48428	8.0772	8.39793	8.13622	7.98667	8.10854	7.97464	8.18401	8.21137	7.98162	8.2396	8.21137	7.97398	8.18339	8.64227	8.24867	8.15756	8.12447	8.45414	8.09833	8.11351	8.08537	8.36258	8.31104	8.09505	8.74717	8.52659	8.9387	8.67518	8.67044	8.21199	8.52839	8.13691
CANX	7.76739	8.02377	7.80902	7.89501	7.82484	7.81199	7.84716	7.54732	8.26669	7.66541	7.73694	7.76511	7.87155	7.54053	8.25006	7.23772	7.76799	8.05583	7.44307	8.05913	7.74647	7.73988	7.69421	8.09505	7.8882	8.14974	7.84337	7.87532	7.73568	7.42749	8.36567	7.99683	7.90634	7.84965	7.93941	7.59276	7.85494	7.80724	8.12037	7.70029	7.80547	8.64357	8.55246	8.60424	8.84133	8.84742	7.58587	8.79066	7.72459
CAPZA1	8.43161	8.12385	8.08008	7.78379	8.06194	7.78612	7.8203	7.93549	8.02657	8.64227	8.10297	8.03246	8.17591	8.25083	8.14906	7.84965	8.05583	8.01718	8.02113	8.00085	7.77458	7.18968	7.86778	7.71137	7.53676	7.83698	7.8007	7.99575	7.82192	7.44655	8.02308	7.61481	7.74297	7.89373	7.83759	7.51072	7.94782	7.98989	8.15539	8.41603	8.4074	8.0192	7.84965	8.07785	7.88229	8.10508	8.67633	7.80244	8.40667
CAPZA2	7.88283	8.10655	7.97788	7.75323	7.94782	7.80373	8.05526	8.04675	8.07286	8.02169	8.23276	7.63398	7.87585	7.71248	7.75433	7.50727	7.6786	7.97733	7.61972	7.83213	7.97529	8.10508	7.16197	7.78668	7.91344	7.76511	8.13826	7.86905	7.80547	7.84777	7.74407	7.96422	7.94849	7.70787	7.83821	7.93091	8.09103	7.88586	7.56402	8.21414	8.52659	7.53164	7.62787	8.00151	7.78038	7.66865	7.99801	7.54387	8.26521
CAPZA3	2.76466	2.94109	3.73911	3.42593	2.86158	2.92582	2.86551	2.65767	2.7315	2.92344	2.54042	2.48838	2.72495	2.86712	3.27194	3.14063	3.0301	3.42154	3.08048	2.71401	2.88141	2.76043	3.16167	3.05654	3.16776	2.71734	2.86316	2.70713	2.70311	3.77157	2.66537	2.98271	3.39681	2.84105	2.73732	2.81789	2.73953	2.66073	2.55573	2.76576	2.57844	2.61786	2.94708	3.09385	2.76301	2.55493	2.71527	2.70963	2.70311
CAPZB	8.14252	8.12447	8.17221	8.05838	8.07785	7.98805	7.99741	8.23202	8.17439	8.23808	8.2793	8.27528	8.1505	8.3319	8.24788	8.01119	8.30171	8.26669	8.15893	8.12852	8.2045	8.42642	7.99868	8.05526	8.15618	7.97529	8.42559	8.3198	8.29215	8.15973	8.04134	8.09505	7.92038	7.86584	8.33499	8.26521	8.22901	8.39891	8.33034	8.20978	8.22033	7.79472	7.6312	7.75269	7.60511	7.40982	8.31184	7.58274	8.45812
CASQ1	3.01285	2.70135	2.80681	2.79766	3.17832	3.01428	3.01465	2.95275	2.75373	2.91649	2.91452	2.67355	3.00448	3.3245	3.27869	3.03213	3.10791	3.0264	2.63169	2.89749	2.90273	2.50184	2.72249	2.71797	2.77866	2.87223	2.95793	2.99027	2.85981	2.63412	2.96038	2.83164	2.562	2.97899	2.98787	2.69945	3.14824	2.95936	2.72249	2.91475	2.90855	2.9092	2.95199	2.86292	3.05937	3.13452	2.86644	3.10562	2.93675
CCDC115	7.72509	7.86282	7.92292	7.92292	7.60355	7.60028	8.01718	7.80902	7.53316	7.97733	7.72509	7.69974	7.43236	8.00085	7.75799	8.07932	7.93877	8.0578	7.88283	8.12037	8.07785	7.88408	7.25213	7.55014	7.91647	7.88645	7.95264	7.86101	8.51216	7.7713	8.05264	7.94849	8.08474	7.85223	7.65773	7.82731	7.98096	7.94992	7.90634	7.9584	8.1539	7.73158	7.89569	7.48439	7.52958	7.84235	8.20898	7.25774	7.6511
CCDC47	7.94245	8.19146	8.45812	8.64357	8.46651	8.79301	8.4074	8.42642	8.7997	8.00282	8.22685	8.56664	8.3404	7.9103	8.75275	8.19063	8.29134	9.05432	8.31104	8.89442	8.51417	8.14401	8.65249	8.86908	8.10793	8.80514	8.38568	8.51032	8.3509	8.75714	9.06429	8.48079	8.75931	8.90667	8.38137	8.32622	9.41609	8.43851	8.63659	8.03881	8.25462	8.93352	9.09073	9.00668	9.33256	9.39757	8.19519	9.22631	8.21199
CD55	9.38698	9.55378	11.5762	11.4418	10.4664	10.2268	13.1962	10.1855	9.59082	9.66085	9.43061	10.6335	9.2845	9.09198	11.635	9.14051	9.12562	9.48887	9.19496	8.7997	10.8033	9.77024	9.67179	10.2205	11.5335	10.3726	9.64664	10.5681	10.4163	11.083	9.18857	10.4917	9.69753	9.18857	11.3118	11.2696	10.0883	9.44259	9.37029	8.52384	8.60239	7.86644	7.44454	7.77917	7.61533	7.9635	10.0408	7.6786	10.4959
CD59	9.64446	9.73844	9.56011	9.60417	9.67914	9.66929	9.62638	10.007	9.92327	9.49112	9.90292	9.7129	10.2301	9.61312	10.108	9.75559	10.1894	9.93519	10.2955	10.1203	10.0656	10.0781	10.855	10.2992	9.96759	9.93806	9.94437	10.4424	10.0781	9.53543	9.87365	9.65594	9.71842	9.90882	9.68133	9.73572	9.7129	9.80248	9.57971	9.29131	9.29786	9.83362	9.85183	9.66929	9.59082	9.51993	9.57971	9.51206	9.52692
CDKAL1	4.38833	4.70579	4.27593	3.96481	4.48697	4.41544	3.74033	3.94822	4.1225	4.24624	4.32425	3.70881	4.06554	3.72654	4.32625	3.43033	3.79221	4.15233	4.25784	3.85872	4.42112	4.08532	3.73267	4.28696	4.09333	4.13653	3.9631	4.45394	4.16338	4.1479	3.92389	4.27205	4.07113	3.93511	4.06611	4.28396	3.3694	4.17149	3.73367	4.627	4.79159	3.75491	3.69718	4.05584	3.91622	3.70081	4.27068	3.81212	4.22121
CFP	6.60681	6.96969	4.22256	3.94901	4.06986	3.93731	3.57669	4.94529	5.05688	6.82233	5.94259	4.62149	4.28101	5.32472	4.03569	4.54289	4.15035	4.00295	3.98723	4.08924	4.06933	4.77953	4.19828	3.79042	4.34734	4.0483	5.12893	3.91064	4.67999	3.86857	4.26156	4.03376	4.37811	3.9747	4.2657	4.35094	6.58284	4.39715	4.47547	8.40992	8.80716	4.79491	4.32259	3.84735	4.11486	3.60378	6.60416	4.25485	7.09382
CGA	3.30598	2.96954	3.37821	3.1717	3.49724	3.23361	3.12978	3.23152	3.11199	3.25625	3.55749	3.20192	3.12321	3.14802	3.26717	3.15552	3.18053	3.19659	3.47356	3.07122	3.19201	3.05478	3.27648	3.05714	3.07545	3.1419	3.2859	3.13961	3.06944	3.12426	3.2925	3.11559	3.2015	3.08167	3.19795	3.27434	3.18298	3.01366	3.10604	3.39748	3.06058	3.30231	3.40118	3.36706	3.55637	3.1952	3.12223	3.24206	3.13314
CHP1	7.64514	7.45097	8.41687	7.84055	8.20597	7.24241	8.09238	7.81142	7.69031	7.94662	7.74696	8.8107	8.32548	8.03811	8.2785	7.15117	8.11817	7.8853	8.24788	7.62738	8.07286	7.47206	7.65329	7.85427	8.11076	8.13751	7.34066	7.78379	7.97733	7.51432	7.89779	7.74055	7.68806	7.71529	7.71248	7.50078	7.42114	7.4911	7.53676	7.35715	7.23686	7.97788	8.3666	8.459	8.20669	8.08068	7.74178	8.07361	8.09631
CHST10	4.8793	4.64128	4.87959	4.91229	4.76509	4.84595	4.94733	5.09991	4.8901	4.84092	5.02267	4.87357	4.90994	5.35101	4.89303	4.76814	5.05038	4.94426	4.89441	4.93826	4.87165	4.79274	4.84897	4.82606	4.71646	4.96092	4.78199	4.96693	4.86297	4.85033	4.95794	4.68582	4.82127	4.99407	5.05609	4.73138	4.71341	4.99297	4.8495	4.92407	4.71395	5.17324	5.38026	4.86954	5.0285	5.50397	4.86071	5.47278	4.85708
CHST14	6.5129	6.36928	6.54525	6.57805	6.12821	6.17279	6.81191	6.85605	6.39784	6.1987	6.34997	6.086	6.4817	7.12775	6.84979	6.56967	6.56196	6.28899	6.62235	6.32562	6.5398	6.89418	6.0518	6.56255	6.41519	6.18904	6.53882	6.44034	6.5767	7.15863	6.55124	6.64014	6.31363	6.33406	6.70245	7.09122	6.30645	6.65485	6.29222	6.38425	6.52861	6.25567	5.91726	6.05548	6.09093	5.80894	6.2031	6.17122	6.56537
CHST3	4.46533	4.58489	4.46414	4.84036	4.43527	4.70579	4.91856	5.05561	5.24352	4.33167	4.58812	4.31213	4.89146	4.95166	4.5976	4.52986	4.95194	4.88546	4.61976	4.86126	4.53864	5.01731	5.31603	4.73355	4.53522	4.93172	4.89902	4.75731	4.61133	4.90831	4.76729	4.40112	4.65809	4.83204	5.02984	4.92594	4.55014	4.69254	4.93412	4.65516	4.57481	4.96253	4.74709	4.77142	4.63317	4.84868	4.5526	4.80762	4.76985
CHST4	4.3992	4.94134	6.55055	6.21813	6.87415	6.80207	6.83045	6.33125	6.53882	6.97169	5.54069	5.80922	8.24181	4.87602	7.51924	5.50049	8.00533	7.92596	8.47703	8.87608	7.7691	6.22868	4.88336	9.02848	7.85982	8.41076	6.99534	7.93483	7.48615	6.42334	7.17822	6.99162	7.65268	8.2388	4.91582	8.45732	5.42223	6.46528	6.06885	5.06752	4.75448	7.18841	7.18086	6.61691	6.57945	6.56038	5.09636	6.8206	6.508
CHST6	4.22672	4.25161	4.1297	3.82505	4.06799	3.77767	3.83061	3.77559	3.3435	3.59455	3.50207	4.50831	3.56042	3.78837	3.93351	3.60308	3.52045	3.22323	3.39073	3.25141	3.21276	3.67805	5.87899	4.43807	3.60308	3.58804	3.53798	3.88197	4.21787	3.77085	3.77559	3.54712	3.62352	3.29273	3.82083	5.95184	3.35776	3.65784	3.24356	3.50507	3.47022	3.14455	3.52556	3.22927	3.42526	3.30038	3.56042	3.73469	4.16172
CHST8	4.61214	4.20703	4.62002	4.62869	4.56126	4.73657	4.73382	4.65081	5.2507	4.29484	4.81598	4.51359	5.08999	4.57002	4.37977	4.29943	4.26204	4.98873	4.73987	5.0045	4.65212	4.38224	4.65001	4.8073	4.47945	4.93967	4.42381	4.24033	4.8755	4.35891	4.9599	4.86126	4.60158	4.88099	4.78825	4.33578	4.99008	4.41694	5.15048	4.41694	4.6223	5.91842	6.03175	5.49076	5.80976	5.81498	4.53464	6.29873	4.26133
CHSY1	7.25907	7.1578	6.85192	6.94303	6.89604	6.97011	6.86565	7.63682	7.50021	6.80711	7.14342	6.83045	7.30221	7.3526	7.00792	6.86258	6.94461	6.83116	6.7632	6.96268	6.90427	6.99366	7.43832	7.00832	6.60279	6.87712	7.00122	6.97011	6.95275	6.89676	7.19513	6.68387	6.73307	6.78071	7.17029	6.79106	7.38627	7.1541	7.48572	6.97289	6.81007	6.35472	6.33094	6.02699	6.2311	6.22212	7.29809	6.27741	7.0823
CKAP4	6.94082	6.88298	6.98068	7.0059	6.85767	6.75977	7.14773	6.57843	7.17492	6.2495	6.64869	6.66444	6.81342	6.78455	7.14818	6.1857	6.71656	6.52405	6.63232	6.62024	6.56702	7.33711	7.05146	6.71441	6.54319	6.96747	6.801	6.83217	6.51674	7.31919	7.07161	6.99805	6.95393	6.63817	7.3237	6.89272	6.70357	6.87597	6.97639	6.23078	6.25325	7.23951	7.11175	7.47961	7.49709	7.41227	6.1669	7.52275	6.8126
CMAS	6.58505	6.54181	6.46966	6.54386	6.39017	6.50909	6.52762	6.0281	6.21581	6.08683	6.21118	6.33184	6.37296	5.87672	6.41659	6.23428	6.25071	6.53713	6.37296	6.33406	6.37575	6.06742	6.82304	6.59305	6.4794	6.62599	6.34066	6.31615	6.16512	6.27804	6.34035	6.39915	6.42047	6.5348	6.13132	6.18003	6.27311	6.34892	6.43531	6.34623	6.44419	6.58047	6.70183	6.85999	7.01379	6.62599	6.44167	6.66971	6.0717
CNIH1	9.12128	9.05886	9.30101	9.08791	9.19008	9.08932	9.59322	9.5184	9.16059	9.16059	9.28621	9.41098	9.32038	9.56225	9.19173	9.66929	9.33769	9.08519	9.31504	9.24775	9.46677	9.24624	9.49112	9.44078	9.14686	9.13024	9.41098	9.28779	9.14686	9.35574	9.31839	9.56885	8.89189	9.10109	9.27921	9.41981	9.19643	9.22123	9.20649	8.88448	8.82265	9.17471	9.16059	9.02248	9.04151	8.97741	9.00533	8.87839	9.24775
CNIH2	4.79955	4.34649	4.96039	4.68947	4.81264	4.67732	4.3648	4.74653	4.85358	4.68113	4.74738	4.91689	4.89794	5.2112	4.70467	4.69615	4.74766	4.9199	4.6082	5.08413	4.63287	4.37512	4.45597	4.64324	4.64944	4.60935	4.43987	4.38782	4.68029	4.59162	5.22662	4.57002	5.06112	5.06781	4.88362	4.45133	4.7648	4.73547	4.71758	4.67732	4.39097	6.05121	5.78107	5.50422	5.10504	5.75283	4.73463	5.82092	4.87303
CNIH3	3.83061	4.34987	4.74632	4.61607	4.55537	4.56974	4.4732	3.59058	4.00726	3.63261	3.89884	4.14209	4.31301	3.66234	4.38888	4.00987	3.73245	3.793	3.94952	3.81035	4.1289	4.33832	5.26806	4.79703	4.08871	3.69248	3.79536	4.00218	4.0789	4.45511	3.92649	4.80241	3.54874	3.71641	3.88756	4.53549	3.76105	3.94711	3.89515	3.84816	3.71219	5.06454	5.32864	5.96516	5.94736	5.70771	3.58435	4.73877	3.90265
COG1	4.42683	4.47856	4.67319	4.55817	4.55125	4.56349	4.61976	4.56811	4.65319	4.6348	4.61525	4.42709	4.48722	4.19167	4.70129	4.62897	4.52055	4.60848	4.63993	4.50831	4.51949	4.56322	4.76232	4.7458	4.44997	4.51799	4.57032	4.63152	4.56923	4.59846	4.55283	4.36376	4.51545	4.52084	4.62503	4.51025	4.59657	4.66703	4.50194	4.61785	4.67676	4.31654	4.46925	4.5452	4.60674	4.38888	4.64239	4.34399	4.58183
COG2	6.28594	6.1242	6.58632	6.5398	6.0281	6.06859	6.13737	5.83358	5.56482	6.35692	5.79394	5.88576	6.07087	5.97936	6.53128	6.23748	6.22153	6.04889	6.24279	6.12821	6.12129	6.0521	5.77342	6.0877	6.07786	6.03432	5.86383	6.51707	6.15379	6.3087	5.94059	6.55711	6.612	6.21962	5.904	6.88531	6.31363	5.96516	5.85272	6.17852	6.24041	5.93494	5.86329	6.13132	6.02699	5.6811	6.31518	6.13563	5.76965
COG3	5.58627	5.70461	5.34041	5.43182	5.62754	5.81087	5.02873	5.15962	5.16046	5.56118	5.08651	5.56912	5.27349	4.91113	5.58736	5.17681	5.36161	5.38624	5.38785	5.44081	5.21364	5.09527	5.61344	5.33016	5.29658	5.35871	5.18656	5.39632	5.76995	5.16685	5.50717	5.57798	5.28087	5.12085	4.75731	4.96744	5.10712	5.14245	5.00211	5.47168	5.30564	5.42197	5.53457	5.67946	5.78618	5.46159	5.3582	5.38414	5.1313
COG4	7.39931	7.31484	7.33432	7.22244	7.50775	7.51227	7.56454	7.24379	7.16108	7.38581	7.43533	7.39252	7.38975	7.65222	7.4339	7.5693	7.62738	7.38581	7.66277	7.13773	7.30044	7.35984	7.3944	7.42211	7.31287	7.21321	7.55975	7.33566	7.13821	7.75	7.01342	7.32907	7.41327	7.1753	7.38135	7.55753	7.46869	7.27862	7.08102	7.4563	7.35437	7.27357	7.19878	7.51174	7.19784	7.22062	7.23686	7.15162	7.48668
COG5	6.65036	6.57059	6.69531	6.72972	6.37392	6.678	7.1707	6.83524	7.06383	6.55223	6.76387	6.79037	6.50871	6.67286	6.43137	6.93552	6.71298	6.8206	6.82494	6.87745	6.59406	6.58413	6.54793	6.67501	6.6385	6.90088	6.57096	6.61658	6.82965	6.76497	6.99247	6.78894	6.94608	6.87784	6.78103	6.89861	6.87818	7.00038	7.18306	6.76355	6.68034	7.19391	7.21676	7.38047	7.59276	7.4786	6.65586	7.49976	6.59942
COG6	5.38549	5.55634	5.50216	5.6249	5.46976	5.53756	5.52072	5.42197	5.30881	5.20724	5.03496	5.24091	5.29634	5.20643	5.39108	5.41946	5.31746	5.34999	5.41686	5.48378	5.2528	5.43569	5.46665	5.59712	5.48998	5.32213	5.26289	5.27561	5.70407	5.39108	5.60913	5.35155	5.34282	5.363	5.37213	5.36464	5.20247	5.42424	5.4307	5.55524	5.45171	5.83358	5.92819	6.04243	6.07287	5.97908	5.17044	5.73405	5.286
COG7	6.58438	6.44228	7.06017	6.84169	6.48917	6.65313	7.53422	6.81045	6.49779	6.27956	6.68941	6.61992	6.42696	6.35535	6.695	6.80433	6.36592	6.60249	6.55363	6.7999	6.66625	6.58896	6.63434	6.82602	6.97255	6.65656	6.56134	6.83591	7.16323	6.83817	6.38457	6.9251	6.8975	6.78139	6.78894	7.20787	6.55941	6.79881	6.55783	6.41044	6.37144	6.63265	6.78931	6.38576	6.9799	6.15442	6.20821	6.72126	6.58122
COG8	5.83496	5.59279	5.78647	5.64566	5.81526	5.57513	5.7431	5.86159	5.96412	5.92987	5.9649	5.74477	5.97991	6.23497	5.699	5.89345	6.03966	5.93664	5.8463	5.94707	5.80005	5.60493	5.48728	5.61046	5.71858	5.95972	5.68322	5.62169	5.7491	5.7726	6.02423	5.59849	5.9654	6.17518	5.91014	5.92819	5.95072	5.8405	6.09639	5.77754	5.72172	6.32529	6.52374	6.65235	6.52243	6.27804	6.06372	6.91501	5.84024
COL7A1	7.35715	7.0885	5.91197	5.99435	5.63697	5.64479	5.54973	5.87729	5.7362	5.39754	5.89809	6.90354	6.24486	5.76855	7.11892	5.52834	5.52239	5.48807	5.79423	5.73757	5.55055	6.48529	6.22929	6.80392	5.516	5.5508	5.50862	5.85934	5.85824	6.25537	5.94319	6.01686	5.29839	5.55055	5.85244	5.79122	5.77285	5.78618	6.51801	5.29965	5.36619	6.01882	6.06083	6.0149	6.03346	6.28279	5.29583	6.34035	5.41789
COPA	6.67928	6.61658	6.79768	6.83337	6.28743	6.22023	6.46496	6.64931	6.20111	6.44004	6.42982	6.53742	6.53584	6.43621	6.50939	6.229	6.28103	6.33406	6.42564	6.17037	6.24011	6.10326	6.32812	6.55296	6.47193	6.51165	6.29159	6.42015	6.4665	6.0894	6.07817	6.6385	6.55973	5.85244	6.25567	6.19986	6.50123	6.54626	6.14689	6.63162	6.4142	5.8714	6.05242	6.15027	5.97679	5.57849	6.53551	5.90032	6.89084
COPB1	8.38137	8.15618	8.3535	8.37228	8.31898	8.41603	8.32208	8.30086	8.62455	8.47002	8.52384	8.26434	8.69263	8.30408	8.35764	8.57124	8.3692	8.441	8.21951	8.44821	8.40152	8.32703	8.6112	8.23202	8.34214	8.72512	8.3509	8.34846	8.42118	8.24042	8.67427	8.20372	8.31583	8.44455	8.74717	8.58803	8.32948	8.45158	8.56261	8.38734	8.18482	8.64567	8.80414	8.83473	9.00945	8.97601	8.43938	8.94786	8.28485
COPB2	6.13704	6.16284	6.15057	6.28534	6.30115	6.50093	6.55711	6.03346	6.32341	5.97739	6.06111	6.09558	6.19556	5.82779	6.29159	6.24545	6.24703	6.17486	5.99578	6.26979	6.1041	6.12097	5.91726	6.22271	5.96566	6.44256	6.01908	6.19116	6.43808	6.15529	6.73693	6.2175	6.31802	6.27898	6.26205	6.39274	6.1851	6.22506	6.30331	6.0926	6.05548	7.09998	7.27813	6.90848	7.32818	6.9651	5.87672	6.7776	6.08886
COPE	6.07722	6.04319	6.23018	5.90842	6.20367	6.0743	6.01373	6.01852	6.11709	6.20167	6.18264	6.24886	6.10701	6.13045	6.17486	5.74611	6.01777	5.83966	5.74553	6.06258	5.77051	5.87729	6.02187	6.0871	6.24731	6.09519	5.98099	5.93297	6.21962	5.75964	6.33465	5.97594	5.87618	5.92793	6.30676	5.79423	6.1478	5.99351	6.13533	5.86726	6.04404	6.54211	6.58438	6.7373	6.7359	6.57772	6.14248	6.45456	6.07605
COPG1	6.42111	7.40273	7.75502	7.26033	7.38775	6.78034	7.35172	6.5067	6.6295	6.33692	6.35843	6.60185	6.52338	6.14396	7.93621	5.73672	6.38261	6.97447	6.29584	6.34892	7.45726	7.03404	7.50226	7.02826	7.60835	6.51937	7.24724	6.8681	7.18306	6.93215	7.2145	8.1355	6.83557	6.8054	7.46473	7.048	7.01194	6.60113	6.35472	6.20046	6.8849	7.67203	6.87939	7.65829	7.0993	6.99687	6.24763	6.93063	6.55677
COPG2	3.87538	3.98809	4.21586	3.84606	4.04887	3.83091	4.23786	3.92153	3.80573	4.04409	3.82317	3.74826	4.01256	4.00458	4.01637	4.05534	3.90525	3.90054	4.10822	3.76275	4.12997	4.21129	5.0191	4.02732	4.27593	3.93786	4.24959	4.10792	4.33714	4.26318	4.06854	4.2581	3.72275	4.127	4.29514	3.99484	3.92414	3.85542	3.85353	4.07249	4.23503	3.95659	3.76708	3.69962	3.47441	4.02809	3.9761	3.54195	4.10768
COPZ1	9.10109	8.95829	9.00945	8.88448	8.859	8.83704	8.77592	8.56453	9.00792	8.68098	8.98658	9.21123	9.03714	8.77828	9.31504	8.65151	9.03714	8.95564	9.04591	9.30252	8.72285	8.68427	8.76025	8.75161	9.43556	9.43915	8.81192	8.90287	9.10585	8.9466	9.39757	9.03133	9.20484	9.2845	8.94141	8.80093	8.74938	8.83804	9.39757	8.87278	8.67044	10.0883	9.90882	9.97034	9.8814	10.1176	8.6884	9.95582	8.61775
COPZ2	5.1195	5.1168	5.01593	5.03773	4.93661	4.92352	5.12786	5.6057	5.38672	4.8001	5.11733	4.99249	5.11345	5.80036	4.87112	5.15582	5.19506	5.15937	5.13023	5.19809	5.18376	5.38574	4.94977	5.05238	5.13673	5.11456	5.04899	5.03959	5.10634	5.164	5.20427	4.97468	4.8815	5.01238	5.40587	5.31062	5.17681	5.41628	5.23328	4.87815	4.83528	5.60594	5.3307	5.61644	5.39684	5.18453	4.93967	5.57435	5.34362
CSNK1D	6.02213	5.81303	5.86614	5.8754	5.76289	5.81194	6.01686	5.85141	6.20969	5.79644	5.85577	5.86299	6.07817	5.84078	6.08286	5.66244	5.7616	6.0248	5.70011	5.83858	5.64312	5.84962	6.05094	6.00729	5.64479	5.90088	5.88635	5.78164	6.26441	5.88603	5.71969	5.69055	5.83196	5.67074	6.04349	5.78023	5.92341	5.87308	5.95184	5.84464	5.78134	5.93439	6.04134	5.81111	5.95776	5.92341	5.8824	6.1987	5.83222
CSPG4	4.23277	4.44612	4.03625	3.92704	3.89196	4.1057	4.55735	4.3179	4.79759	3.77034	4.15233	3.92126	3.82057	4.17415	4.25014	4.83118	3.85433	3.64001	3.76934	3.51394	4.16006	4.78066	4.0535	4.12521	3.92889	3.79042	4.14568	3.74564	3.81475	4.3872	3.71197	4.22039	3.88388	3.73879	4.62119	4.39688	4.18246	3.96006	3.93704	4.1297	4.31539	4.06882	3.71267	3.67192	3.86808	3.77409	3.70881	3.81828	4.41694
CSPG5	3.49331	3.58549	3.56484	3.5508	3.44124	3.53253	3.64242	3.47378	3.56181	3.68869	3.41909	3.81237	3.70955	3.43331	3.54779	3.63455	3.65902	3.27174	3.61693	3.49995	3.63381	3.75441	3.43642	3.54662	3.50438	3.51372	3.6657	3.58193	3.56484	3.87974	3.71174	3.49834	3.62813	3.5227	3.89196	3.6583	3.44543	3.64764	3.65928	3.33999	3.73245	3.52247	3.52247	3.61523	3.61545	3.86115	3.52648	3.69012	3.585
CTSA	9.7129	9.79463	9.97895	9.90292	9.67637	9.59994	9.74313	9.18076	8.96613	9.53962	9.58418	9.47085	9.52692	9.76295	9.78732	9.10585	9.72547	9.94437	9.61091	9.41609	9.46056	9.84593	10.166	9.23996	9.74087	9.40336	9.65158	9.61312	9.85499	9.78984	9.10109	9.51406	9.48124	9.31504	9.98835	9.67914	9.22464	9.44857	9.06429	9.49287	9.56225	8.44018	8.50773	8.35853	8.21199	8.18339	9.03861	8.30485	9.67637
CTSC	9.95028	9.84593	9.31119	9.25101	9.00792	8.92133	8.3319	9.60877	8.62547	10.4088	9.95582	9.20983	8.86644	9.55378	8.86138	9.62638	9.24476	8.83911	9.05576	8.73483	9.18857	9.58836	9.10871	8.42385	9.3273	8.78864	9.67179	8.68952	9.19972	8.50773	8.91163	9.24476	9.00119	8.586	9.03427	9.45271	10.1268	9.53543	8.96478	9.78487	9.75331	7.56289	7.32329	7.64122	7.41128	6.84504	9.46467	6.72582	10.0656
CTSZ	5.97965	5.94034	5.66551	5.34615	5.88516	5.42275	5.4331	5.58094	5.67152	5.95749	5.8034	5.63425	5.71474	5.76399	5.72656	5.21657	5.61293	5.611	5.4454	5.49965	5.45663	5.7015	5.96335	5.45529	5.65569	5.46827	5.70068	5.33122	5.65162	5.23298	6.36928	5.40692	5.39658	4.99249	7.2845	5.14144	5.69792	5.52519	5.31382	5.63315	5.89869	5.65301	5.35575	5.78164	5.30295	5.4331	6.06258	5.36161	5.89345
CYBB	5.65941	5.748	5.09581	4.97363	5.2275	4.94811	4.58869	4.71782	4.90014	5.74506	5.42989	4.88362	5.07583	5.1346	4.97496	4.54058	5.31408	4.83781	5.10504	4.81987	4.47272	5.41922	5.47223	4.49775	5.14861	4.62149	5.32423	4.77843	5.32132	4.39974	4.71368	4.83144	5.19914	4.28992	4.91526	4.43185	5.54565	5.16242	4.48635	5.92111	5.89046	3.61875	3.65806	3.65784	3.48258	3.40014	5.50556	3.69195	5.84412
DAD1	9.67914	9.90015	10.1589	9.81728	10.0442	9.61091	10.3103	9.33421	9.71023	9.83362	9.75331	9.93806	10.007	9.88932	10.3962	9.3906	9.90592	9.85499	9.96759	9.84341	9.95305	9.82268	10.3175	10.4307	10.108	9.98527	10.1141	9.81205	9.79962	9.5774	10.314	10.2809	9.62638	9.76295	9.67637	9.45662	9.88394	9.45662	9.78233	9.72059	10.0591	10.6982	10.3726	10.5763	10.3067	10.5003	9.48887	10.288	9.68929
DAG1	6.84362	6.83634	8.05195	8.28253	7.78275	8.00471	7.68587	7.55803	7.86584	6.78894	7.43974	7.62465	8.1155	7.28167	7.80842	7.20316	7.61051	8.01314	7.43681	7.62031	7.58386	7.49871	7.36447	7.50676	7.10837	7.95596	7.29159	7.63282	8.23524	8.09959	7.98527	7.72459	8.02583	8.042	7.69806	8.28485	7.7757	7.41227	7.77025	6.99997	6.65273	8.32128	8.32771	7.97733	8.37634	7.87585	6.70826	8.49674	7.14604
DCN	7.38729	7.40473	8.28555	8.21871	7.96094	7.89779	7.72509	8.88208	8.04813	7.34066	8.33659	7.2634	7.92409	8.78864	7.5756	8.72173	8.43083	8.00471	8.24403	7.92973	9.23126	7.8925	6.75155	7.36404	8.19598	8.02053	8.60538	7.57611	7.79949	7.9272	7.96287	8.26015	7.93877	7.84235	8.28555	8.58983	8.41603	8.3334	8.15893	5.26663	5.26506	7.29298	7.19391	7.37953	7.27675	6.99883	7.43127	6.73409	8.04539
DCTN1	7.07078	7.17242	7.17242	7.24863	7.0993	7.13821	7.38975	7.52497	7.5459	6.96898	7.17864	7.38381	7.36079	7.51569	7.28846	7.31836	7.2954	7.45442	7.16238	7.25907	7.24635	7.19703	7.09854	7.28403	7.37377	7.32412	7.21758	7.38	7.27575	7.44454	7.62738	7.29766	7.14342	7.30784	7.45776	7.58062	7.29672	7.08022	7.47206	7.1356	7.14342	7.62787	7.53782	7.77799	7.86644	7.56344	7.07435	7.83936	7.20488
DCTN2	5.40746	5.28432	5.40794	5.26482	5.31543	5.42197	5.34117	5.47725	5.61374	5.44081	5.38813	5.29115	5.63914	5.29634	5.51352	5.20612	5.40587	5.33909	5.51495	5.38281	5.3232	5.39081	5.45758	5.27299	5.39453	5.41279	5.2275	5.26778	5.45306	5.47111	5.51303	5.36847	5.26015	5.32785	5.40746	5.36133	5.26423	5.3032	5.55471	5.41392	5.30217	5.92547	5.70688	5.93494	5.94766	5.73864	5.40406	6.09639	5.40611
DCTN3	8.66478	8.3071	8.55167	8.43348	8.39891	8.3198	8.33659	8.84018	8.87608	8.859	8.93096	8.61485	9.02248	8.93616	8.3633	8.99177	9.04017	8.5838	8.93997	8.96478	8.74035	8.56065	8.66478	8.82265	9.04992	8.80716	8.56838	8.37554	8.78653	8.48973	8.94786	8.7818	8.46278	8.60814	8.5228	8.66377	8.54877	8.48973	8.72052	8.96198	8.61485	9.21604	9.25609	9.25942	9.20484	9.38348	8.76896	9.15003	8.90287
DCTN4	6.65348	6.69291	6.74152	6.74488	6.51707	6.60819	6.82268	7.0035	6.94899	6.49051	6.71031	6.60416	6.7273	6.74555	6.80065	6.83337	6.61691	6.70826	6.63301	6.85021	6.69291	6.61567	6.91427	6.71691	6.6825	6.90427	6.6098	6.78529	6.76532	6.48109	6.84437	6.53944	6.71171	6.80933	6.5801	6.64531	6.74976	6.72693	6.75293	6.50155	6.57445	7.09217	7.2504	7.2763	7.45249	7.45298	6.64179	6.84578	6.74012
DCTN5	6.01186	6.03115	6.03061	5.96991	5.73297	5.77128	6.24829	5.73539	5.83884	5.98496	5.88264	5.8927	5.75553	6.02614	5.81526	5.7384	6.00759	5.81444	5.79644	5.64395	5.81141	6.08795	5.61698	5.97017	5.88576	5.78218	5.99032	5.91145	6.22023	5.85055	5.79093	5.77051	5.79536	5.69876	5.94649	5.9662	5.89616	5.87338	5.55793	6.01045	5.8254	5.72116	5.73565	5.73379	5.66466	5.74029	5.89072	5.4725	5.7917
DCTN6	9.02535	9.01318	9.00119	9.18235	8.95169	9.19972	9.02988	9.35003	9.40336	9.19008	9.2845	8.91163	9.32549	9.34643	8.7997	9.21604	9.30753	9.12128	9.341	9.36433	9.09486	8.99456	9.04591	9.52221	8.93997	9.27921	8.8063	9.08366	8.90287	9.03565	9.21604	9.22631	9.20297	9.13174	8.96478	8.79859	9.04017	9.13024	9.22941	9.22464	9.14686	9.25284	9.40336	9.24306	9.52485	9.61513	9.30101	9.53962	9.08366
DDOST	9.82861	9.8071	9.87071	9.79463	9.80248	9.82568	9.61091	9.77497	10.2438	9.8071	9.76054	9.85754	9.93806	9.68395	9.94129	9.70774	10.0815	10.0373	9.89205	10.1433	9.85183	10.0156	10.2067	9.81465	9.82861	10.1589	9.96759	9.85754	9.77998	9.73844	10.4125	9.82861	10.0247	9.96485	10.0127	9.99466	10.0127	10.0185	10.2103	10.0469	10.0851	11.0683	11.0225	11.1955	11.1081	11.0421	9.76761	10.9927	9.70774
DERL1	7.85029	7.87878	7.60835	7.88283	7.53526	7.64621	7.9649	7.72625	7.6964	8.03048	7.6786	7.93678	7.76399	7.67314	7.94141	7.71471	7.65985	7.75853	7.69031	7.83821	7.58902	7.76623	7.79359	8.09771	7.71584	7.77744	7.93029	7.86584	7.76454	7.75433	7.67492	7.65381	7.75	7.77744	7.81783	7.71529	8.02308	7.7713	8.21646	7.7725	7.75159	7.41876	7.7959	7.75159	7.90832	7.92038	8.19211	7.8007	7.74237
DERL2	7.40322	7.41179	7.35621	7.56078	7.23905	7.30315	7.35347	7.46627	7.77078	7.47503	7.28071	7.43338	7.80483	7.41081	7.51771	7.68145	7.85808	7.56549	7.63628	7.95905	7.52791	7.73871	7.2954	7.20787	7.50727	7.70465	7.47358	7.23605	7.03448	7.53939	8.45075	7.19703	7.62516	7.71931	7.41459	7.29858	7.40473	7.48859	7.88948	7.43338	7.37623	8.70791	8.67755	8.69383	8.85085	8.60912	7.61533	8.7057	7.22378
DERL3	5.35262	5.13984	5.48047	5.1553	5.23713	4.97411	5.2299	5.16101	5.611	5.35709	5.567	5.60337	5.38076	5.21575	5.22243	5.57108	5.0793	5.41973	5.00937	5.66825	4.92124	5.74611	4.7787	5.19269	5.36743	5.33835	5.23926	4.73518	5.14861	5.03823	6.47508	5.60888	5.44109	5.42446	5.61644	5.0574	5.86726	5.15937	5.47642	4.89224	4.82947	6.98971	6.676	7.09258	6.87256	6.69886	5.7015	6.82602	4.88072
DHDDS	5.8511	5.89756	5.84252	5.82627	6.03144	5.86752	6.50284	5.90059	6.1857	5.8927	6.1583	6.22868	6.03259	6.15775	5.92111	5.65784	6.07852	6.14904	5.99032	6.04375	5.68977	6.02154	6.13563	6.19752	5.89345	5.89105	6.16488	6.17545	6.04835	6.13307	6.22212	5.85055	5.85382	5.83966	6.17454	5.7767	5.8902	6.15924	6.14149	6.13097	5.8369	6.68069	6.62888	6.5107	6.68647	6.75625	5.91569	6.42564	6.21388
DNAJC3	7.20488	7.106	7.4481	6.92293	7.59542	6.8054	6.19586	6.79106	7.28536	7.33216	6.87453	7.28071	7.56236	6.86913	7.49924	6.23554	7.09469	7.25554	7.12897	7.15245	6.94498	6.86988	6.805	6.82378	7.12522	7.27956	7.186	6.95313	6.8206	6.26524	7.89971	7.11214	6.78211	6.62298	6.79508	6.20821	6.57977	6.83926	7.00953	6.93063	6.92439	8.4283	8.22168	8.53775	8.03452	8.19519	7.29952	7.83213	7.17152
DOLK	6.69291	6.27123	6.51423	6.662	6.01967	6.12097	6.7179	6.36898	6.48886	6.1599	6.40193	6.30208	6.39784	6.36813	6.34623	5.93576	6.3266	6.29487	6.30047	6.32784	6.21518	6.40284	6.1987	6.30989	6.17156	6.54693	6.25071	6.37926	6.24636	6.12679	6.72364	6.02423	5.91757	6.45456	6.69853	6.34464	6.46116	6.30676	6.41014	6.46781	6.4634	6.97403	7.03235	6.90202	7.26125	7.14126	6.40005	7.45051	6.2281
DOLPP1	6.05771	6.12251	6.33725	6.62392	6.41552	6.48137	6.64765	5.90261	6.7304	6.42111	6.0515	6.80244	6.39079	6.49611	6.17545	5.78562	6.41229	6.73903	6.15203	6.60448	6.39358	6.27034	6.5247	6.24512	6.42397	6.9139	6.28374	6.69813	6.66864	6.60883	7.09998	6.21695	6.46871	6.92905	6.56806	6.43112	6.37455	6.35137	6.61373	6.23692	6.43971	7.63965	7.76967	7.81142	7.75853	7.73988	6.19925	7.75502	6.30837
DPAGT1	7.49259	7.64514	7.41459	7.3786	7.44406	7.45197	7.48811	6.58663	7.62249	7.22877	7.05603	7.57092	7.3585	6.97524	7.26869	7.03532	7.33889	7.33711	7.27089	7.54337	7.18968	7.40799	7.22613	7.67544	7.58436	7.58492	7.59657	7.31836	7.51126	7.25477	7.87585	7.87751	7.45583	7.72219	7.52448	7.39025	7.38423	7.23001	7.30454	7.20267	7.292	8.44272	8.33659	8.25006	8.06935	8.02722	6.89604	8.30259	7.35984
DPM1	10.4959	10.2138	9.90592	9.88709	10.1141	10.0342	9.91742	10.13	10.1589	10.1433	9.97607	9.90292	9.97329	10.0851	10.14	10.0748	9.84079	10.2372	9.84341	9.93246	9.74837	9.54937	10.0815	10.3504	9.72547	9.82019	10.1894	9.86262	9.92327	9.85499	10.3726	9.70281	9.96759	10.0982	9.55581	9.87071	9.83833	9.90292	10.0342	10.2699	10.0498	10.7187	10.761	10.8659	10.8033	10.8349	10.4579	10.7135	9.88932
DPM2	6.90696	6.81958	6.69324	6.69043	6.55296	6.512	6.85957	6.74976	7.18306	6.77535	6.9348	7.20488	7.09813	6.72012	6.97403	6.45028	6.95742	6.9876	6.59581	7.31343	6.66686	6.7469	6.97289	6.86746	7.09639	7.24555	6.80392	7.06305	6.9176	6.66653	7.31836	6.44673	6.80711	6.92651	6.93444	6.61658	7.09898	6.92758	7.31754	6.83524	6.52727	8.19598	7.78208	8.07932	7.88882	8.03735	6.70505	8.05583	6.85805
DPM3	7.03683	6.83959	7.41743	7.26565	7.31879	7.23733	7.37154	7.46523	7.76739	7.58849	7.34024	7.70195	7.46195	7.68587	7.19262	7.51876	7.66438	7.16456	7.30736	7.67433	7.52128	7.2763	6.48752	7.62303	7.14854	7.36261	7.30137	6.96141	7.57904	7.19048	8.02979	7.59812	7.20828	7.32818	7.2163	7.38775	7.40709	7.06835	7.52958	7.52067	7.50473	9.26775	9.09627	9.35003	9.3094	8.95953	7.2621	8.67518	7.42259
DPY19L1	4.93172	5.1553	5.24667	5.28863	5.12085	5.19783	5.25503	4.9207	4.36509	4.9207	4.81568	4.89171	4.84261	4.28957	5.30165	4.58733	4.52335	4.85033	4.8776	4.40455	4.84036	5.06063	4.96253	5.45306	5.01784	4.50753	4.91307	5.20191	4.98923	5.1195	4.3872	5.11318	4.69226	4.49492	4.95603	4.81659	4.95296	5.01731	4.43297	5.06112	5.25257	4.12059	4.19167	4.03866	3.86115	3.72072	4.61017	3.99821	4.9582
DPY19L2	4.28346	4.34706	4.32874	4.32757	4.80622	5.18631	4.09003	6.04712	5.45554	4.73111	5.39427	3.73931	5.01784	5.29063	4.61812	6.17913	4.45744	4.98528	4.47971	5.11542	4.89876	4.91332	4.34564	4.49066	4.9224	4.78037	4.87496	4.86378	4.24624	4.5788	4.6699	4.72917	4.28481	5.54565	4.51653	5.0162	4.53212	5.04036	4.92756	4.80902	4.96636	4.28696	4.57643	3.87538	4.00137	4.38833	4.5534	4.18653	5.02076
DPY19L3	7.59428	7.77973	7.72982	7.71302	7.51283	7.5285	7.73402	8.25691	7.91842	7.5444	7.49763	7.22565	7.6489	7.45875	7.69197	7.90832	7.67758	7.50473	7.73033	7.4294	7.88882	8.13343	7.02754	7.35076	7.55649	7.50822	7.75627	7.52021	7.3522	7.97331	7.71809	8.06727	7.62465	7.67758	7.75433	8.23276	7.76684	7.78275	7.54152	7.75502	7.92225	7.66596	7.36079	7.48387	7.38975	7.61272	7.64949	7.66152	7.83151
DPY19L4	6.69776	6.69183	6.63265	6.62696	6.67866	6.54693	6.8054	6.64471	6.0894	6.36813	6.52306	6.41014	6.44483	6.44286	6.55186	6.73942	6.48849	6.48209	6.6971	6.52338	6.66517	6.26325	6.6901	6.71832	6.34346	6.46682	6.69291	6.54793	6.64272	6.53742	6.4964	6.63301	6.49549	6.5674	6.42822	6.54045	6.32276	6.60515	6.56669	7.02483	6.82197	6.29064	6.42696	6.20193	6.21233	6.37455	6.3587	5.99981	6.4477
DYNC1H1	5.1079	5.01368	5.13435	5.03981	5.10411	5.03746	5.02533	5.13673	5.03746	5.09416	5.0406	5.08467	5.22634	5.27163	5.08496	4.97957	5.14994	4.96608	5.13383	4.8287	5.05478	5.01187	5.29115	5.14347	5.03204	5.02185	5.13297	5.10385	4.88985	4.93035	4.962	5.13827	4.92562	4.92731	5.15287	4.94234	5.02108	4.96553	4.99222	5.0812	5.07957	4.83528	4.94811	5.2448	5.25041	4.88765	5.19587	5.07122	5.16908
DYNC1I1	4.1038	4.30083	4.5389	4.47792	4.53011	4.57758	4.46842	4.56153	4.36767	4.17791	4.21129	3.85618	4.12915	4.08482	4.33742	4.50664	4.35499	4.55042	4.12195	4.23558	4.58654	4.54695	3.87943	4.26928	4.47824	4.35383	4.4615	4.51707	4.31626	4.5854	4.22926	4.58986	4.68557	4.63007	4.24846	4.50556	3.92465	4.43724	3.97786	3.9286	4.07413	3.67065	3.9683	3.62954	4.49379	3.9136	4.47856	4.28839	4.25455
DYNC1I2	6.07401	6.0755	6.56508	6.63576	6.85605	7.01194	6.75398	6.91835	6.68285	6.58795	6.89459	6.79259	6.68488	6.88152	6.87256	7.65381	6.21491	7.126	6.93289	7.00551	6.82894	6.55622	6.26858	6.91531	6.63543	7.1578	6.77317	6.09004	7.29994	7.01033	6.88635	6.74185	7.36496	7.07198	6.69324	7.1765	6.83817	7.01741	6.57202	6.19234	6.31706	6.38199	6.37798	6.65313	6.36178	6.61532	6.77254	6.61373	6.53614
DYNC1LI1	7.66438	7.74297	7.77078	7.86838	7.71074	7.8327	7.75102	7.77458	7.74353	7.62516	7.6638	7.67314	7.71931	7.38085	7.29018	7.6964	7.63848	7.47016	7.83574	7.6709	7.38085	7.75	8.19211	8.04394	7.32772	7.35582	7.64782	7.32055	7.6621	7.23425	7.6621	7.68145	7.90234	7.61908	7.75057	7.62189	7.7833	7.75502	7.62409	8.04675	8.05913	7.53577	7.79052	7.4911	7.57092	7.64735	7.71189	7.23087	7.75269
DYNC1LI2	7.48957	7.47712	7.65329	7.79287	7.75	7.83515	7.96422	7.52067	7.972	7.30315	7.56078	7.60083	7.73033	7.55319	7.6621	7.60135	7.68639	7.80483	7.78668	7.66099	7.69974	7.7757	7.64572	7.78153	7.61908	7.89014	7.55601	8.01314	7.74055	7.65552	7.68145	7.62465	7.66706	7.75057	7.85092	7.71694	7.55267	7.77695	7.7713	7.33167	7.42028	7.90832	8.05329	7.96218	7.99741	7.9584	7.16197	8.00668	7.58691
DYNLL1	11.7562	11.49	11.1881	11.3034	11.4123	11.4418	11.9178	11.1081	11.1733	11.1808	11.7837	11.4321	11.2021	11.49	10.8985	11.5335	11.2021	11.3301	11.2462	10.8349	11.1145	11.0098	11.3671	11.2949	11.4123	11.2021	11.4123	11.32	11.4798	11.1218	11.1955	11.2249	11.0358	10.9927	11.4696	11.4509	11.2462	11.1955	10.9621	11.857	11.705	11.1081	10.9482	11.4696	11.4418	11.2174	10.7558	11.3477	11.3477
DYNLL2	5.93517	5.94562	5.82835	5.71502	6.01346	6.0155	5.91221	6.13765	5.96218	5.95947	6.16923	6.17222	6.04243	5.86868	6.18599	5.88432	5.9654	6.03582	5.97594	6.00125	5.92111	6.12309	6.4477	6.6134	5.95549	6.01346	6.08027	6.02396	5.76738	6.14689	6.15027	6.17093	5.99435	5.89648	5.90897	5.96077	5.73432	5.92161	5.99128	6.24456	6.07228	5.94766	5.77426	6.11377	6.01825	5.82223	6.10297	5.97621	6.00814
EDEM1	7.89134	7.8733	7.89971	7.72109	7.65329	7.75159	8.08671	7.43236	7.92916	7.90501	7.7735	7.8882	7.78038	7.6334	7.6786	7.73341	7.54683	7.64014	7.34112	7.68694	7.38476	8.06668	8.2367	7.84521	7.58794	7.49871	7.8925	7.53577	7.67758	7.48757	8.26108	7.80428	8.00085	7.60028	8.02512	7.64514	8.08964	7.86838	8.08537	7.63573	7.71074	8.30869	8.29833	8.44179	8.38897	8.1715	8.33883	8.44992	7.69806
EDEM2	6.44801	7.01454	7.4076	7.15206	6.89896	6.85567	7.45051	5.87367	7.0158	6.66407	6.55427	6.70755	6.52079	6.00701	7.10644	6.33153	6.61658	6.74727	6.58729	6.72364	6.49744	7.26608	7.18686	6.87636	6.91531	6.46371	7.10045	6.77138	6.89972	6.84289	6.88188	6.61501	6.92218	6.93215	7.17492	6.84905	7.04237	6.95164	6.7675	6.64309	6.87219	7.40982	6.91835	7.92855	7.50627	7.12404	6.65962	7.46429	6.56702
EDEM3	7.84235	7.57145	8.85308	9.07431	7.6334	7.75323	8.32771	7.72398	8.05981	7.69197	7.73033	8.07361	7.98805	7.48336	8.14615	7.41973	7.84586	8.22966	7.69296	7.7886	7.82372	7.62031	7.2845	8.03945	8.08068	8.27213	7.61429	8.05329	8.48346	7.37008	8.62547	8.36258	8.31898	8.10508	8.17669	8.43431	8.21802	7.87751	8.20823	7.6886	7.31919	8.50697	8.79406	8.45732	8.53421	8.66377	7.63282	8.59173	7.85741
EDN1	6.74042	6.56637	6.54353	6.71546	6.58255	6.62163	7.10467	6.37731	6.18904	6.67633	6.65348	7.37284	6.68681	6.22418	6.98309	6.00348	6.39663	6.34563	6.9787	6.91074	7.44307	6.64596	5.89756	7.81848	6.66096	6.83417	6.09699	7.76511	6.92293	7.09722	6.7757	6.63232	6.5502	6.63649	6.98383	7.19135	6.59439	6.64531	6.98146	7.97464	7.73092	6.40222	6.50093	6.03346	6.17338	6.66686	6.16831	5.7294	6.73208
ENGASE	7.45442	7.17029	7.2845	7.53886	7.11723	7.23425	7.15739	6.96898	7.2415	7.48757	7.42699	7.50577	7.43127	7.73748	7.34631	7.62409	7.47961	7.4657	7.2849	7.4412	7.12019	7.26125	6.77857	7.12983	7.14037	7.75	7.17293	7.29386	7.39881	7.55109	7.79416	7.33797	7.53726	7.57957	7.62303	7.59812	6.98461	7.34292	7.85808	7.86778	7.62625	7.92855	8.1862	7.87585	7.68694	7.87986	7.3757	8.03811	7.32861
ENTPD5	4.33007	4.47437	5.05375	4.99939	4.62845	4.68282	4.79128	4.40112	4.29943	4.50341	4.6789	5.13272	4.45425	4.86521	4.94733	4.40989	4.44503	4.56101	4.45456	4.17415	4.87844	4.56433	4.49975	4.37569	4.72232	5.08975	4.5976	4.66785	4.65056	4.63566	4.66312	4.9588	4.63508	5.06859	4.69647	5.03796	4.67945	4.51572	4.37729	4.5734	4.56182	4.72507	4.75189	4.62845	4.77118	4.58706	4.42271	4.23305	4.51973
EOGT	7.89069	8.09959	8.20747	8.23122	7.69748	7.51676	8.25691	8.31027	8.18401	7.13641	7.73988	7.32818	7.73805	7.52275	7.91082	7.51126	7.12149	6.96475	7.1961	7.24863	7.58849	8.00151	8.36837	7.86282	6.86296	7.16154	7.60672	7.56236	7.16108	7.51174	6.61302	6.97949	7.72109	7.23686	8.04938	7.73928	7.93418	8.02512	7.02677	7.78801	7.91407	5.41628	5.78618	5.87899	5.87199	5.3255	7.61593	5.61509	7.83759
EPHA5	2.98132	2.97034	2.91224	2.89965	2.7448	2.75646	2.97548	3.02833	2.92769	3.07642	2.97878	3.04925	3.13209	3.04233	2.98765	3.33435	2.91606	2.878	3.05285	2.89596	2.85313	3.10275	3.00607	2.87646	2.96973	2.83261	3.07585	2.8043	2.94683	2.83658	2.97329	3.04647	2.88319	3.13149	2.84661	3.00408	2.98746	3.05917	2.85659	3.18754	3.03709	3.3314	3.11955	2.926	2.88359	2.93381	2.76498	2.84715	2.94502
ERP29	9.47324	9.56011	9.5375	9.47517	9.34643	9.31319	8.93616	9.40155	9.8071	10.0498	9.82568	9.66085	9.52485	10.0691	9.48303	9.82268	9.8071	9.44677	9.71842	9.83109	9.35761	9.52221	9.76761	9.00119	9.33256	9.72828	9.43722	9.26454	9.22941	9.66085	10.0247	9.60203	9.79235	9.60203	9.59322	9.49889	9.61091	9.27262	9.83833	10.2583	10.1112	10.8253	10.5681	10.9039	10.7343	10.6429	9.97329	10.8202	9.47517
EXT1	6.61302	6.66444	5.91515	5.93439	6.01293	6.01605	6.27311	6.48041	6.73659	5.49101	6.39079	6.19291	6.15057	6.06258	6.66031	5.85325	6.04712	6.03012	6.44834	6.56134	6.36115	6.7776	6.12625	6.16196	6.16778	6.02867	6.4223	6.50599	5.81472	6.53846	6.04945	6.33822	6.0155	6.094	5.94766	5.92251	6.07971	5.80479	6.41144	6.27341	6.47286	5.78675	5.45335	5.51406	5.61374	5.9872	5.919	5.6854	5.7992
EXT2	6.27311	6.38167	6.4571	6.14396	6.09729	6.05626	6.42268	6.39302	6.23394	5.88834	5.92959	6.33406	6.00701	6.29584	6.33064	6.19812	6.34867	5.9307	6.20731	5.9304	6.16431	6.27008	6.13282	6.16831	6.02669	6.24216	6.24245	6.16983	5.98527	6.42884	6.26767	6.31518	6.05121	6.06057	5.95972	6.32529	5.95947	6.17575	6.00585	5.83496	5.78421	6.41388	6.44034	6.64967	6.35067	6.55087	5.76855	6.19752	6.10724
F12	4.33939	4.36149	4.69482	4.64294	5.05013	5.07877	4.7812	4.37292	4.43611	4.5168	4.36983	5.14434	4.57136	4.6258	4.73904	4.20785	4.23277	4.76843	4.21586	4.6258	4.31106	4.17633	4.411	4.86435	5.03229	4.53549	4.67076	4.69254	4.71646	4.55597	4.54834	4.55651	4.47945	4.79382	4.5695	4.54834	4.49831	4.36318	4.7069	4.09141	4.1057	5.11483	5.20585	4.94866	5.05345	4.98094	4.41375	5.08726	4.18414
F5	4.90556	4.85735	8.88574	8.81192	7.22195	7.03448	6.80318	5.88994	5.47616	5.60939	6.76821	5.78368	5.63992	8.22101	5.60732	4.79898	6.16831	5.99723	5.70068	5.68738	7.64514	5.24244	5.40794	4.94109	8.1512	9.34814	7.26957	6.60355	8.55346	7.48957	5.21492	8.77592	9.341	6.18964	5.30511	7.35715	5.66996	5.79453	6.02318	4.715	4.84514	4.76955	4.55125	4.8658	4.98469	4.64519	5.39815	4.62869	5.77231
F8	6.94608	7.27862	5.45609	5.60445	5.59122	5.73646	5.43626	6.66407	8.1169	7.90234	6.82304	5.53809	6.94339	6.84398	5.41036	6.9639	6.5161	6.44801	5.8383	6.40861	5.96077	6.1872	6.62888	6.26616	5.64208	6.7779	6.29487	5.66909	5.95518	5.50049	6.51707	5.78107	6.31241	7.17029	5.9649	5.93868	6.11069	6.55186	7.46036	8.32622	8.22168	7.44307	7.59226	7.83574	8.13751	6.54922	8.89314	10.0781	6.93552
FCSK	6.16375	5.98805	7.13379	6.92794	6.46999	6.47258	6.57609	6.04626	6.31241	6.40924	6.48787	6.71171	6.57342	6.64596	6.52576	6.61373	6.7944	6.71902	6.508	6.69671	6.5937	6.45456	6.23925	6.37702	6.84686	6.77069	6.41659	6.4394	6.32843	6.83591	6.81583	6.70323	6.84472	6.92331	6.21518	6.86371	6.23525	6.39079	6.72582	6.28968	6.22445	6.90503	6.59199	6.94269	6.44228	6.55941	6.40131	7.02754	6.17338
FKRP	4.90101	4.76009	4.56549	4.73846	4.65566	4.83473	4.94134	5.04227	5.01162	4.81831	4.78548	4.6469	4.9249	4.4687	4.96527	5.0838	4.83394	4.71118	4.6673	4.59874	4.67519	5.02984	5.00755	4.73085	4.8079	4.68913	4.84621	5.08066	4.16389	5.07017	4.58841	4.78095	4.77331	4.60427	4.92292	5.1635	4.62897	4.90232	4.63152	4.97496	5.0596	4.19271	4.36288	4.22507	4.51215	4.65674	4.85253	4.76538	4.78825
FKTN	6.86847	6.82378	6.28685	6.4618	5.8781	6.25042	6.4684	6.51324	6.19752	6.25686	6.29645	6.1195	5.79758	6.23296	6.27831	6.72869	6.64377	6.23394	6.4108	6.56038	6.695	6.39692	6.44389	6.41622	6.13885	6.40736	6.32874	6.68716	6.33184	6.14751	6.7547	6.18992	6.38425	6.64695	6.24672	6.62365	6.25166	6.40736	6.2971	6.20847	6.31547	6.44541	7.12355	6.0788	6.47033	6.66791	6.4016	6.5788	6.09792
FMOD	8.68748	8.45158	9.14236	9.23996	8.27139	8.22101	8.52659	9.85499	9.50075	8.48079	9.22941	9.62394	8.6465	9.65158	8.86778	8.97452	9.04849	8.43083	8.77008	8.3609	8.87391	8.84503	6.9996	8.13622	8.3535	8.12168	8.74816	8.49327	8.56356	8.99316	8.86778	9.23653	8.73594	8.66377	8.89314	9.18399	9.53543	8.9054	9.05296	7.98937	7.72459	8.99739	8.92627	9.01072	9.02988	9.13318	9.05163	9.23468	8.89189
FOLR1	6.4571	7.24594	7.90694	8.00739	8.09505	8.19598	7.15942	8.10793	8.45578	7.8327	7.4657	7.86905	8.5496	7.96037	7.93091	6.92869	8.78864	8.44641	8.93231	9.04992	8.04003	7.43127	7.21407	8.15539	8.10097	9.2494	8.13192	8.87839	8.78414	8.02053	8.7503	7.74874	8.43851	8.78967	7.52958	8.36482	7.08149	7.63965	8.95427	6.81849	7.40844	9.18076	9.48491	9.45072	9.46862	9.62205	7.28403	9.26454	7.73033
FPGT	4.7798	4.65701	4.83473	4.6606	4.59684	4.6365	4.94025	4.5091	4.39183	4.73518	4.77596	4.48321	4.28785	4.45366	4.64294	4.72871	4.75241	4.87681	4.65756	4.63173	4.69008	4.46469	4.74393	4.53522	4.79187	4.55364	4.60362	4.75928	4.66933	4.65516	4.47181	4.55707	4.67758	4.53152	4.51999	4.65374	4.74607	4.60184	4.45105	5.0829	5.16498	4.2446	4.49093	4.2395	4.11977	4.52793	4.60762	4.24277	4.65344
FTCD	4.21816	4.24846	4.19271	4.38086	4.19325	4.46758	4.47682	4.27015	4.7368	3.95872	4.17389	4.13741	4.26629	4.54779	4.13573	4.21154	4.22645	4.65344	4.17093	4.70241	4.19297	4.21281	4.31188	4.42994	4.03866	4.66396	4.25755	4.31301	4.41159	4.29571	4.72422	4.29379	4.36401	4.87602	4.47122	4.36654	4.4618	4.36038	4.68346	4.20703	4.21509	5.28834	5.38492	5.22858	5.39556	5.50991	4.21922	5.54044	4.15263
FUCA1	6.29676	6.06428	5.97535	6.09432	6.09943	6.21552	6.66653	5.96964	6.25443	6.89459	6.65273	6.33878	6.17698	6.66653	5.68295	6.04491	6.10153	6.46087	6.03906	6.23809	6.08373	6.0982	5.95156	5.76965	5.98869	6.36533	5.88322	6.07517	6.56377	6.06772	6.18427	5.8225	6.18872	5.7634	6.61051	5.92765	6.46496	6.20702	6.14033	6.43586	6.40704	6.39387	6.3331	6.33725	6.41259	6.55557	6.79951	6.10493	6.48752
FUOM	5.57902	5.93604	5.63026	5.38003	5.40768	5.41546	6.11684	5.40768	5.40543	5.87618	5.78304	6.09344	5.49277	5.48517	5.08804	5.18093	5.43099	5.34117	5.31198	5.2778	4.79325	5.93694	5.72573	5.26806	5.79758	4.918	5.33278	5.52156	5.75798	5.54943	5.57214	4.76538	5.14539	4.74334	5.33757	5.17599	5.39707	5.43948	5.02135	5.80729	5.59407	6.48656	5.62143	5.68055	6.18062	6.086	5.49829	5.89345	5.79536
FUT3	4.96476	4.83053	6.45283	6.13765	6.29248	6.00729	7.10339	4.9975	4.74077	5.37036	4.8495	6.64496	5.07046	4.56582	5.21867	4.89634	5.5053	5.7437	5.3771	5.23452	5.9966	4.6673	5.60493	6.75155	7.09765	5.81498	5.11403	6.16431	6.15588	6.12251	5.2945	6.71514	5.86752	5.96464	5.85382	6.83082	5.30881	4.60964	4.99297	4.72061	4.33194	5.43434	5.30907	5.27274	5.01398	5.04364	4.81293	5.31408	5.4376
FUT4	6.35137	6.27065	7.00158	7.08642	6.4895	6.55256	6.37269	6.51452	6.38112	6.74621	6.82715	7.46195	7.05146	6.42666	6.44541	6.2094	6.67928	6.57579	6.93712	6.59234	6.57913	6.94461	6.3328	6.81849	7.42259	7.06176	6.49711	7.17152	7.2727	7.70411	6.71263	6.74759	6.85884	7.55014	6.67633	6.97524	6.64931	6.64803	6.09611	6.39178	6.25293	5.90371	6.06057	6.22868	6.06372	6.03175	6.34681	6.50724	6.61726
FUT5	5.00635	4.51182	4.64128	4.92381	4.64156	4.96503	4.8415	4.96608	5.62169	4.7812	5.0737	4.51738	4.69063	5.11805	4.93062	4.68463	4.73166	5.06961	4.68408	5.17627	4.44666	4.5437	4.66256	5.00126	4.66033	5.2299	4.60648	4.77118	4.89986	4.69063	5.52072	4.81659	4.77387	5.00317	5.04119	4.56974	5.12893	4.81293	5.25697	4.70467	4.89441	6.17454	6.21143	6.0982	6.29905	5.86643	4.97175	6.13282	4.83144
FUT6	4.77306	4.60427	5.78618	5.61238	5.57276	5.32839	6.02088	4.61187	4.74821	5.08835	4.74019	5.94482	4.99324	4.75591	5.01286	4.59134	5.17711	5.464	5.16125	5.16183	5.26065	4.76009	4.94838	5.89345	5.98607	5.61833	4.94025	5.56912	5.35052	5.5286	4.96744	5.50556	5.44057	5.30933	5.28173	5.75964	4.98227	4.75421	4.96608	4.91582	4.57136	5.04714	5.23614	5.15808	4.915	5.14696	4.91582	4.99485	5.21412
FUT7	4.50048	4.13712	4.25838	4.18945	4.30912	4.17736	4.06713	4.37921	4.43377	4.65489	4.53947	4.08508	4.54087	4.4172	4.4577	4.18083	4.12059	4.3108	4.20156	4.28101	4.28208	4.26204	4.21787	4.15587	4.21067	4.15587	3.98969	3.88255	4.43897	4.05376	4.39208	4.15558	4.07748	4.20352	4.06687	4.07668	4.58047	4.1085	4.40053	4.4847	4.53464	4.89119	4.77306	5.0737	4.84343	4.68492	4.44997	4.84736	4.28864
FUT8	5.92058	6.4964	7.68918	7.65882	7.01617	6.82455	6.40041	6.42531	5.90788	6.1701	6.51835	6.87184	6.18153	6.56669	6.63017	6.1851	6.05829	6.1875	6.06804	6.24071	6.83524	6.75941	6.80135	6.88049	6.95352	6.54658	6.84905	6.71941	6.75044	6.11775	6.66827	7.5756	6.65518	6.75797	6.70215	6.84544	6.8849	6.54077	6.6901	5.92519	6.32593	6.24364	5.9451	6.23665	6.23296	6.60749	6.45646	5.96846	6.24133
FUT9	2.73181	2.66906	4.19192	3.87108	2.89283	2.76092	2.60547	2.79597	3.06176	2.6848	2.8895	3.62046	3.36821	2.72643	2.82252	2.81395	2.82203	2.70901	2.99048	2.90603	3.1841	2.7892	2.89213	2.79068	3.82031	2.63977	2.83822	3.52626	2.62276	3.27453	2.81221	5.04766	3.87186	3.214	3.05439	2.74983	2.61786	2.84125	2.98848	2.52384	2.77547	3.3655	3.45929	4.69199	4.41907	3.06115	2.66537	3.29615	2.62085
GABARAP	11.1733	11.1434	11.0225	11.1955	10.9201	10.9927	11.0949	11.4321	11.3477	11.5112	11.5335	11.0758	11.4234	12.1418	10.8253	11.6818	11.5016	11.4321	11.49	11.5112	11.32	11.6474	11.0683	10.7656	11.3034	11.166	11.49	11.1218	11.0288	11.1081	11.3301	10.9927	11.129	11.1218	11.2862	11.2401	11.4798	11.4123	11.2696	11.705	11.6695	11.4123	11.403	11.4123	11.3118	11.4509	11.4696	11.3301	11.2462
GAL3ST1	4.68696	4.62503	5.13624	5.32083	5.82223	5.78503	5.36543	4.70356	5.3771	4.59632	4.91307	5.23018	5.22109	4.52279	5.12059	5.0037	5.01162	5.20507	5.25041	5.47751	5.25588	5.194	4.88046	5.64511	5.12085	5.75826	4.65212	5.15048	6.09558	5.97965	5.50937	5.5417	5.49023	5.71919	5.26882	5.36898	4.82208	4.98469	4.92352	4.65756	4.58269	5.97767	5.88544	6.1079	6.13072	5.84332	4.5587	6.04105	4.39379
GALE	6.02896	5.99808	6.47821	6.35502	6.41823	6.32212	6.79768	5.78618	6.01605	5.85325	6.07287	6.68285	6.25866	6.2263	6.30453	5.55105	6.01908	6.63469	5.83552	6.17156	6.33249	5.91145	6.68285	6.4684	6.27375	6.7137	5.96464	6.68285	6.95815	6.30392	6.21455	6.50871	6.34842	6.36504	6.80711	6.22842	6.0018	6.18003	6.26919	6.08973	5.96335	6.42301	6.24071	6.56319	6.678	6.61628	5.57902	6.46027	5.74254
GALK1	3.64265	3.86507	3.93862	3.62886	3.90188	3.76008	3.90976	3.62786	4.01339	3.93458	4.03291	3.95979	3.77817	3.66304	3.77688	3.47892	3.90447	3.83438	3.86997	3.73911	3.73367	3.94469	4.12437	4.12362	3.6841	3.92889	3.93322	3.704	3.81137	3.94975	4.09801	3.78469	3.87563	3.89489	3.88858	3.67974	3.80624	3.92599	4.08022	3.88801	3.97362	4.38418	4.45626	4.68525	4.59934	4.58355	3.55434	4.42381	3.87454
GALNT1	8.89803	9.17471	8.58704	8.61955	8.57025	8.69383	8.96198	8.3404	8.87278	8.60336	8.5544	9.00007	8.62749	8.60814	8.60738	8.24867	8.80414	8.422	9.16817	9.03861	8.95291	9.00383	8.44641	8.71951	8.586	8.83133	8.92627	8.63852	8.62349	8.50139	8.77592	8.82804	8.72401	8.38734	9.61977	8.11004	8.89064	9.27566	8.65742	9.0979	9.33421	8.67427	8.79739	8.5228	8.53775	8.66556	9.01318	8.63949	8.63036
GALNT10	7.05566	6.93898	7.34481	7.38135	6.62365	6.65453	7.03999	7.36447	6.15118	6.59055	6.92331	6.83488	6.42666	7.00551	7.59542	6.93637	6.83005	6.81477	6.72271	6.47972	6.94899	7.28309	7.93743	7.75159	6.84204	6.64437	7.22521	7.00122	6.99444	6.87784	6.4938	7.14604	6.72903	6.66759	7.10132	7.26915	7.31919	7.14423	6.83183	6.90848	6.91311	5.69925	5.58226	5.7362	5.73864	5.60493	6.3951	5.95127	6.77997
GALNT11	7.972	8.09631	8.24254	8.49503	8.09361	8.51032	8.87278	8.67325	8.88321	7.88706	8.29682	7.66438	8.35264	8.80956	8.57411	8.88074	8.66057	8.62749	8.64765	8.88074	8.87155	8.96478	8.15682	8.28635	8.32703	8.74717	8.60239	8.45414	8.61215	9.03714	9.30252	8.84742	8.57411	8.80716	8.88074	9.03565	8.66377	8.7503	8.82265	8.32703	8.36258	10.0102	10.0851	9.97607	9.96759	9.99802	8.1624	9.85183	8.1114
GALNT12	6.16019	6.46966	8.47251	8.62645	7.6786	7.84337	8.22168	7.10218	7.27314	7.02826	6.86187	8.40826	6.88414	6.25686	7.24379	6.44256	7.27768	7.02525	6.86565	6.79881	7.79889	7.23951	7.98805	7.43928	7.48711	7.84337	7.47552	7.94604	9.37195	7.62139	7.43629	7.40273	7.45489	7.60567	7.16371	8.47002	6.57701	7.63628	7.39025	4.9301	5.13827	8.15188	8.06794	8.16737	8.51417	8.17439	5.46976	8.07785	6.90276
GALNT13	3.22343	3.29785	3.39748	3.43099	3.27477	3.27934	3.32912	4.32487	3.18073	3.19981	3.34514	3.15776	3.51111	4.4037	3.38877	3.83598	3.63355	3.25349	3.1417	3.4819	3.49766	3.49858	3.13571	3.4808	3.46266	3.27261	3.6362	3.30318	3.24894	3.46311	3.18793	3.53027	3.39619	3.41667	4.06933	3.45929	3.68435	4.03725	3.32011	3.17933	3.17153	2.99753	3.05003	3.15086	3.04428	3.14576	3.22281	3.09529	3.68071
GALNT14	5.95776	5.77729	6.37671	6.20138	6.92293	6.74374	5.85164	5.44877	5.5329	6.85649	6.17757	6.41889	5.66825	5.07046	6.26139	4.73933	5.91647	5.96516	6.44004	5.90452	5.49715	5.15123	5.73272	8.15254	6.57475	5.79617	7.26472	5.45862	4.93605	6.15623	5.8754	5.89046	5.49513	5.71754	5.30671	6.08256	5.30725	5.90613	5.5268	4.99222	5.08726	5.43284	5.63804	5.54247	5.71603	5.77022	6.30521	5.73565	6.11039
GALNT15	5.50556	5.74773	4.63797	4.32957	3.87888	3.7554	4.36206	6.40553	5.43544	5.04794	5.14092	5.12006	4.2425	5.44135	4.86954	5.39815	4.18495	4.13055	3.96279	3.77458	4.6127	4.41694	4.87681	3.91648	4.42518	4.02893	4.50315	4.84567	4.1572	5.22216	3.76148	4.52766	3.86228	3.98672	5.30645	4.20212	5.04198	4.4436	4.21181	5.82198	6.01686	4.05509	4.16659	3.93481	3.80681	4.15007	5.75798	3.76302	5.85824
GALNT16	4.95521	4.90556	4.21615	4.46096	4.69282	4.6822	4.64354	5.23018	5.07638	4.86071	5.27163	4.28924	5.29682	5.50911	4.42854	5.16323	5.10559	4.84817	4.89523	5.26882	5.20372	4.7744	4.10325	4.36318	4.87007	4.90448	5.01884	4.67945	4.36427	4.38392	5.01678	4.56837	4.85933	5.13572	4.68029	5.06727	4.84764	4.90152	4.70041	5.79947	5.59013	5.2075	4.95551	4.74188	4.74709	4.74523	4.88362	4.61187	4.97657
GALNT17	4.59016	4.38524	4.20438	4.40593	4.18136	4.31213	4.41544	4.64746	4.5854	4.12059	4.66396	4.25327	4.5	4.61493	4.32844	4.29514	4.57586	4.2657	4.40932	4.35668	4.50698	4.70579	4.33336	4.23068	4.39629	4.65592	4.36767	4.20977	4.18712	4.1819	4.24596	4.5475	4.21641	4.32572	4.16117	4.64631	4.30711	4.15344	4.4735	4.75323	4.70579	5.47804	5.02984	4.8387	5.31088	5.38358	4.07413	5.10582	4.51408
GALNT18	5.16854	5.01187	4.57159	4.59134	4.78661	4.89119	4.97768	5.10385	4.94584	5.41628	4.97311	4.79731	4.86323	4.78353	4.96994	4.85033	5.05135	4.34593	5.28331	5.03305	4.76594	4.9224	5.225	4.62816	4.7458	4.74366	4.6789	4.89415	4.542	4.59569	4.91307	4.91229	4.64076	4.82631	4.51157	4.72308	4.64294	4.88423	4.60072	5.282	5.18323	4.57533	4.29074	4.51215	4.55761	4.63065	6.02669	4.65809	5.07446
GALNT2	7.32592	7.424	7.17334	7.21849	6.76289	6.91867	7.21676	7.40322	7.77458	6.68613	6.85377	6.62756	7.63734	6.83739	7.47613	6.85305	7.08357	7.26079	6.86331	7.54242	6.73554	7.50273	7.4563	7.65661	6.80822	7.72862	6.9543	7.48711	6.67732	7.28846	8.03382	6.75867	7.47613	7.41646	7.06703	7.14164	7.40844	7.21933	7.85623	6.3529	6.44584	8.17736	8.34846	7.95464	8.2388	7.75799	6.73275	8.35264	7.10685
GALNT3	6.22778	6.24364	7.0585	7.14983	7.03571	7.06625	7.2727	5.88432	6.54181	5.97621	6.31802	7.29672	6.76044	5.66496	7.17407	5.7437	6.61959	7.30044	6.65273	6.9543	6.99648	6.32593	6.80318	6.67466	7.12063	7.25649	6.62632	7.02637	7.22471	7.10045	6.88568	7.49656	7.05932	7.24904	6.83851	7.00277	6.78632	6.73448	6.83337	6.29064	6.21356	7.09765	7.21407	6.93968	7.13425	7.39113	5.49203	7.04272	5.8366
GALNT4	5.97337	6.01464	7.72052	7.92785	7.61972	7.7892	7.94194	6.30989	6.32784	6.7179	6.85055	8.15973	7.41786	5.72573	8.18177	5.62651	7.24379	8.77122	7.54242	7.99453	7.87465	6.62854	7.33934	7.03151	7.86778	8.042	6.54452	8.31816	7.27675	8.20978	6.99047	8.52558	8.25761	8.52384	6.58831	7.09469	7.4339	6.35443	6.55906	6.08683	5.92577	6.30961	6.04213	6.08624	6.01186	6.30676	5.97218	6.3633	6.12508
GALNT5	4.90994	4.96348	5.4824	5.57333	5.29658	5.24747	5.38813	4.45687	4.22424	4.55364	4.77066	5.75772	4.14898	4.11453	4.54032	4.06528	4.58677	4.8909	4.4738	4.10875	5.37683	4.61758	5.11345	4.68664	6.64803	5.46132	5.07986	5.77342	6.17037	4.98039	4.30635	6.54181	5.23982	4.75871	4.95378	5.46717	4.671	4.87525	4.22095	4.22533	4.04719	4.12333	4.0093	4.12306	4.08164	4.05982	4.16951	4.17932	4.68193
GALNT6	5.51406	5.71169	7.14079	7.07395	6.28716	6.33217	5.68879	4.94787	5.43099	5.6914	5.85521	6.8756	5.08349	5.11085	5.81634	5.36241	5.47857	5.75798	5.41901	5.47168	6.15057	5.7979	6.30331	5.59683	5.67786	6.62632	5.93354	5.7505	7.38676	7.01863	5.2604	6.6997	6.20337	6.17338	6.50871	6.82528	6.2132	5.36	5.51549	5.84107	5.95776	5.72143	5.8463	5.61753	6.02729	5.47435	5.39581	5.32917	5.35337
GALNT7	7.69296	7.74584	9.48689	9.59082	8.8107	8.91038	10.2546	7.2638	8.34125	7.93678	8.21802	9.24476	8.38488	7.31435	8.42118	7.25554	7.94073	9.15736	7.93877	8.07215	8.86267	8.08671	8.54564	8.83473	8.90156	9.34294	8.30259	8.87155	8.66057	9.14844	8.81565	8.37554	8.42739	8.68207	9.27744	8.35522	7.84521	8.75931	8.3609	8.12037	8.06935	9.42657	9.65594	9.15288	9.26941	9.56011	7.25127	9.05432	7.83698
GALNT8	3.89826	3.67974	4.08793	4.02732	3.96642	3.93962	3.7292	4.19858	4.19271	3.7959	4.07035	4.03699	4.1545	4.04719	3.88168	4.01201	3.78992	3.80931	3.89009	4.01869	3.95474	3.8708	3.83705	3.66592	3.70805	3.93935	3.77207	3.87505	3.91648	4.09635	3.89569	3.69374	3.66304	3.90894	4.21922	3.81662	4.01896	3.69743	3.97843	3.93403	3.72424	4.19639	4.28924	4.27837	4.52578	4.79677	3.90425	4.8085	3.62628
GALNT9	4.50366	4.43409	4.51973	4.2859	4.22424	4.36258	4.42854	4.37622	4.76843	4.39738	4.20465	4.35094	4.53753	4.4497	4.31457	4.211	4.16468	4.55682	4.35919	4.64746	4.25595	4.26516	4.35068	4.39379	4.09943	4.66118	4.04607	4.3564	4.72179	4.09141	4.73518	4.37037	4.22754	4.56608	4.22898	4.02865	4.4735	4.31457	4.69844	3.92414	4.39466	5.77396	5.56118	5.58764	5.51068	5.32813	4.19244	5.75185	4.23305
GALNTL5	2.77572	2.68575	2.80832	2.60894	2.54229	2.56265	2.71859	3.09975	2.63412	2.82636	2.71465	2.60501	2.7384	2.61786	2.60074	2.66537	3.02138	2.60444	2.52384	2.67993	2.73092	2.69292	2.81031	2.64286	2.67603	2.73814	2.82519	2.71304	2.67058	2.75069	2.65883	2.77757	2.71179	2.64104	2.58792	2.54994	2.55157	2.68057	2.61039	2.91522	2.69773	2.65398	2.67215	2.61786	2.56752	2.54579	2.81921	2.58679	2.64772
GALNTL6	3.28978	3.05327	3.21337	3.41842	3.31484	3.2955	3.30318	3.26717	3.16065	3.19579	3.19818	3.31509	2.91522	2.99048	3.57194	3.45353	3.18194	3.45656	3.55191	3.02579	3.30018	3.42017	3.26672	3.35078	3.29022	3.18215	3.34223	3.48403	3.23506	3.23086	3.24571	3.38727	3.46107	3.31484	3.41451	3.47423	3.64529	3.23343	3.42197	3.45656	3.42484	2.97487	3.17671	3.05497	3.07159	3.1948	3.42377	3.1415	3.31836
GALT	5.12918	5.31088	5.10661	4.99432	4.79217	4.86493	4.91636	4.89331	5.09935	5.45005	5.02903	5.24769	4.82181	5.08776	4.99485	5.57163	5.2865	4.86666	5.37635	5.16046	5.02561	4.99249	5.56147	4.96666	5.47616	5.13703	5.14434	5.00261	5.12867	5.14193	5.1827	5.42424	5.05316	5.13703	4.90339	5.27807	5.17627	5.05064	4.94318	5.49829	5.76022	5.39108	5.36213	5.17188	5.65784	4.89552	5.33627	5.74661	4.92292
GANAB	9.50075	9.27399	8.89901	8.98908	9.16359	9.33421	9.36433	9.38515	9.40738	9.27399	9.48491	9.44476	9.50075	9.258	9.35003	9.5184	9.62205	9.32549	9.36256	9.46258	9.42319	9.54371	9.37195	9.31504	9.42159	9.48689	9.52692	9.32549	9.15453	9.27921	9.43915	9.5184	9.35406	9.42657	9.12128	9.48303	9.40911	9.27744	9.39956	9.45485	9.34643	9.63069	9.65819	9.33421	9.53162	9.32213	9.1103	9.85499	9.30101
GBA2	6.20731	6.10493	6.22475	6.20911	6.16431	6.25781	6.35726	6.35759	6.39915	6.30931	6.20254	6.65586	6.511	6.49279	6.15623	6.50323	6.44736	6.35443	6.13503	6.06831	6.17852	6.33942	6.34867	6.1265	6.44673	6.35028	6.25042	6.24133	6.8151	6.50531	6.32341	6.59305	6.33371	6.49218	6.90773	6.67766	6.39634	6.22747	6.39079	6.32153	6.18062	6.60681	6.64596	6.80971	6.91948	6.87597	6.38576	6.84093	6.27341
GBF1	6.0515	6.15176	6.1041	6.31647	5.89918	6.27831	6.84289	6.33878	6.51003	5.88322	6.33249	6.14149	6.33663	6.27123	6.06568	6.54077	6.29395	6.63919	6.12251	6.49711	6.19958	6.75434	5.98496	6.09583	6.27866	6.64998	6.22747	6.49995	6.5161	6.68791	6.63058	6.4817	6.63649	6.43745	6.30115	7.08275	6.47602	6.32403	6.74221	6.26767	5.9751	7.10218	7.25989	6.66265	7.04237	7.04683	5.85934	7.09639	6.32843
GCC1	4.75899	4.69615	4.5788	4.57032	4.40679	4.38032	4.80622	4.36595	4.58242	4.57188	4.39266	4.54458	4.50137	4.84234	4.56463	4.4615	4.34987	4.52445	4.35555	4.51081	4.34154	4.49975	4.54779	4.44886	4.58629	4.55761	4.43105	4.56693	4.56463	4.6472	4.56837	4.29461	4.41572	4.56693	4.55986	4.3872	4.66202	4.49264	4.42324	4.66143	4.63199	4.86044	4.7055	4.81831	5.08413	5.11483	4.65031	5.05856	4.50256
GCNT1	5.09112	5.25612	5.70407	5.93945	5.0339	5.00724	4.87628	5.38785	4.55509	5.21628	5.43434	6.73693	4.69309	5.10103	4.8901	5.10247	4.6789	5.24721	4.56349	4.43958	5.15808	4.92896	5.61374	4.76756	5.49642	5.07419	4.80381	5.02267	5.59145	5.45171	4.15233	5.38151	4.92649	6.05355	5.40108	4.70467	5.41115	4.93204	4.62755	5.45972	5.56294	4.26106	4.11832	4.46706	4.33277	3.97446	4.96875	4.13139	5.02372
GCNT3	6.13563	6.13533	11.3301	11.233	10.4504	10.6429	10.845	8.02377	6.09122	8.85207	7.5666	10.509	9.41797	7.65661	8.54076	7.33977	9.34814	9.90592	8.36482	7.25086	11.233	8.03811	6.96932	8.09569	12.1235	11.1434	9.08069	10.179	10.2236	11.2778	7.88047	10.292	9.42852	10.8611	5.63054	11.4798	5.95215	8.16178	7.66331	5.90532	5.47411	6.50909	6.48	7.22877	7.39681	5.81361	5.63563	5.50267	8.422
GCNT4	2.6469	2.6837	2.83424	2.97629	2.77039	3.09748	3.03413	2.84761	3.05917	2.84125	2.79398	2.97155	2.88359	2.5725	3.08795	2.81642	2.70069	3.00373	2.72822	3.01205	3.02754	2.80706	2.81155	2.78617	2.82609	2.86732	2.94211	3.12612	2.94334	2.68984	2.96285	2.92895	2.93899	2.9141	2.75674	2.81297	3.04391	2.70494	2.83472	2.625	2.92809	3.03464	3.06984	2.93235	2.90232	3.03525	2.82252	3.29192	2.94989
GCNT7	4.02679	4.21281	3.9439	3.80854	4.07966	3.9401	3.81187	4.01174	4.13545	4.11891	4.00029	3.83813	4.05028	4.00696	4.14739	3.9508	3.91004	3.97686	4.09226	3.89222	4.14346	4.01637	4.11292	3.99295	4.06452	4.1068	4.0722	4.04467	4.02244	4.0564	3.88059	4.10356	3.77817	4.00381	4.11802	3.91147	4.16866	3.91307	3.84735	4.03021	4.21312	4.31433	4.01973	3.74877	3.71412	4.09554	4.33221	4.35499	4.04409
GFPT1	7.64837	7.7959	8.53873	8.60063	8.17295	8.13343	8.13121	7.32236	8.30328	7.19829	7.43082	8.53213	8.0507	7.07603	8.30086	7.38286	7.63061	8.27059	7.73928	7.82192	7.94604	7.44655	7.99511	8.02851	9.04017	8.67633	7.5459	8.20978	8.3641	8.11617	8.48688	8.64137	8.08348	8.40233	8.16573	8.10097	7.26869	7.77917	8.36009	6.98233	6.99047	8.84976	8.96076	9.29786	9.32549	9.16214	6.86117	9.12562	7.292
GFPT2	7.40709	7.53014	7.81553	7.68366	6.98577	6.98068	7.40473	8.98533	8.459	6.34718	7.50078	7.00711	8.53686	7.85918	7.3522	8.00016	7.79112	7.42306	7.68252	7.54102	7.61644	8.67971	7.61481	7.31574	7.0451	7.05689	8.02308	7.23342	7.03999	7.09515	7.41876	6.56287	7.48711	7.29437	7.94782	7.62787	8.93352	8.28168	8.1155	4.61727	4.42026	6.54922	6.90658	6.61836	6.4276	5.74506	7.15691	6.07666	8.07861
GLB1	8.2008	8.18109	8.9054	8.9054	8.441	8.4878	8.69931	8.45075	8.22544	8.58278	8.53873	8.3501	8.50229	8.65335	8.22168	8.11881	8.89803	8.56664	8.50404	8.67145	8.30171	8.84742	8.46001	8.68637	8.47429	8.49327	8.59975	8.34295	8.38397	8.1899	8.23808	8.35935	8.60336	8.35522	8.71096	8.47079	8.66268	8.43771	8.19356	8.07785	8.19146	8.08407	8.02308	8.36567	8.23122	7.89306	7.93283	8.24567	8.66556
GMDS	5.20135	5.29063	6.64531	6.35662	5.49048	5.55418	6.49995	5.02873	5.6367	5.45945	5.61509	6.89566	5.41712	4.95462	5.79122	5.3719	5.464	5.90318	5.43152	5.24321	6.36449	5.6348	5.32162	5.7091	6.09669	6.12955	5.26121	5.70011	6.63649	6.55087	5.72143	7.36312	6.06258	6.05771	6.55395	6.1242	6.00959	5.24115	5.53122	5.09137	5.28027	6.03175	6.19784	6.06742	5.90504	5.84277	5.41086	6.27034	5.44515
GMPPA	6.74152	6.62298	6.64803	6.41725	6.88708	6.73107	6.89566	6.04598	6.55296	6.17757	6.51937	6.87636	6.62525	6.62365	6.92869	6.32023	6.49086	6.32529	6.29773	6.4384	6.27095	6.62199	6.55711	6.82642	6.67324	6.70647	6.67664	6.31898	6.43873	6.6398	6.94421	7.09515	6.49311	6.7015	6.8975	6.33406	6.72693	6.44167	6.58154	6.04461	6.07056	7.50078	7.2526	7.52228	7.56078	7.34241	6.17454	7.52646	6.57342
GMPPB	5.72344	5.52629	5.50799	5.67449	5.69525	5.66934	5.92251	5.43598	5.99693	5.60124	5.81472	5.92793	5.87928	5.79673	5.50422	5.59738	5.64847	5.91145	5.59517	5.9932	5.48998	5.62516	5.57435	5.70068	5.55055	5.748	5.65086	5.45459	5.62119	5.5486	6.23169	5.68405	5.71051	5.89809	5.84277	5.58498	5.81303	5.59279	6.14606	5.45033	5.4827	6.97488	6.76785	6.84204	6.87975	6.61268	5.66685	6.61959	5.74773
GNE	7.85163	7.87585	8.83911	8.91657	7.66596	7.33977	7.90893	7.95049	7.36168	7.72109	7.165	7.64066	7.84646	7.39071	7.9566	8.00817	7.69031	7.38286	7.66438	8.02241	8.459	7.35715	8.31659	9.78984	8.95427	8.536	7.52448	7.66541	7.7965	9.20297	7.79472	8.59777	7.60672	7.73033	7.45537	9.08666	7.07276	7.69296	7.424	7.41037	7.35347	7.31919	7.165	7.50324	7.38775	7.41367	7.80664	7.15117	7.71137
GNPNAT1	7.22659	7.43082	8.03881	7.90957	8.00416	7.7959	8.07286	7.76511	8.34929	7.26033	7.38527	7.85427	8.18687	7.23605	8.32128	6.79327	7.47452	7.27128	7.52228	7.83385	7.7096	7.80128	8.08068	7.94547	8.05009	8.09569	7.81553	7.34066	7.75378	7.34481	8.58502	8.68637	7.60624	8.10854	7.45148	7.86404	7.59428	7.16715	8.02979	7.04114	7.12404	9.02113	8.85793	8.76255	8.71216	8.78758	7.16282	8.77252	7.6078
GNRH1	4.25327	4.49576	4.42937	4.542	4.75296	4.60158	3.92335	4.91935	4.15945	4.6606	4.4802	4.15367	4.28563	3.99319	4.47041	4.57909	4.58463	4.1906	4.94866	4.054	4.70994	4.42767	4.4308	4.42354	4.66456	4.04607	4.47915	4.33939	4.11401	4.36206	4.11746	4.55843	4.16759	3.98858	4.39125	4.48842	4.26658	4.25755	4.2231	4.53782	4.43377	3.58099	3.3713	3.56229	3.44844	3.47044	4.73166	3.55882	4.21954
GOLGA2	6.87673	6.79652	7.09122	7.00393	6.87636	6.85918	7.30086	7.22521	7.02291	6.41451	6.86523	6.74759	7.00551	7.13075	7.35398	6.82931	6.83992	7.11522	7.00507	6.87293	7.04388	7.01495	7.08808	6.89341	6.98345	7.10764	7.02446	6.98971	7.11682	7.38676	7.39583	7.20742	6.91611	6.91948	7.21231	7.02947	6.89008	7.05525	7.09558	6.59092	6.42078	7.42501	7.40568	7.3786	7.44553	7.37722	6.38395	7.51283	6.80135
GOLGB1	6.3453	6.27985	6.55783	6.58122	6.42501	6.56255	6.6123	6.49279	6.81377	6.10183	6.33725	6.60515	6.47847	6.67141	6.58994	6.6246	6.70505	6.37113	6.61691	6.6098	6.62854	6.38199	6.66336	6.5161	6.27741	6.60515	6.229	6.4684	6.73626	6.55941	7.07276	6.5533	6.7162	6.68716	6.64119	6.85527	6.33343	6.41388	6.71656	6.16778	6.07605	7.48018	7.42986	7.3944	7.51072	7.04237	6.17757	7.57305	6.43655
GORASP1	5.0826	5.12893	5.28547	5.23377	5.26149	5.41875	5.52468	5.34971	5.43841	5.24191	5.11923	5.43041	5.45784	5.39241	5.20901	5.4147	5.2778	5.46455	5.3299	5.36793	5.19676	5.44162	5.2414	5.37661	5.17129	5.67649	5.20612	5.36793	5.46294	5.45784	5.53809	5.31918	5.47511	5.686	5.41946	5.46507	5.27274	5.26183	5.38946	5.34843	5.35413	5.63054	5.68237	5.59145	5.69925	5.66438	5.06264	6.17367	5.38026
GOSR1	6.67898	6.72693	6.65414	6.63265	6.88568	6.80277	6.31332	6.9412	6.57609	6.75941	6.66759	6.71203	6.66936	6.42696	6.96707	6.74042	6.63404	6.76532	6.64869	6.79652	6.71298	6.55747	6.55186	6.85338	6.97403	6.7547	6.62921	6.83116	6.65036	6.68752	6.65757	6.95508	6.618	6.67286	6.54825	6.68315	6.68516	6.63017	6.59869	6.62061	6.7015	6.54858	6.78825	6.79613	6.73275	6.67428	7.09342	6.7273	6.64662
GOSR2	5.96787	5.96875	5.6938	5.70935	5.88544	5.85798	5.50314	5.64182	5.66685	5.68459	5.75207	6.03459	5.75881	5.6057	5.92161	5.7591	5.77995	5.67649	5.71652	5.77513	5.65545	5.63721	5.86018	5.80645	5.76374	5.96104	5.74506	5.80755	5.84464	5.82779	5.97908	5.76452	5.74341	5.65107	5.78705	5.71808	5.65891	5.7362	5.67233	6.07256	5.98744	6.13307	5.96077	6.17518	6.24191	6.03639	5.94877	5.98842	5.66381
GPC1	6.03317	5.75826	5.75857	5.69762	5.70181	5.76022	5.88119	6.06626	5.91418	5.18607	5.32966	5.412	5.90585	6.06911	5.61915	5.44828	5.7252	5.74717	5.62277	5.7591	5.7091	5.63425	5.56458	5.98018	5.51808	5.73757	5.37869	5.54326	5.35383	5.75521	5.70266	5.81416	5.41036	5.6652	5.52266	6.08399	5.68295	5.6057	5.8781	4.99595	5.10901	6.38294	6.17122	6.18814	6.03487	6.38829	4.84678	6.46279	5.64765
GPC2	4.29484	4.27316	4.54087	4.44554	4.51602	4.56322	4.22149	4.35977	4.72179	4.22095	4.42381	4.37622	4.9139	4.56693	4.46443	4.22507	4.40317	4.50664	4.34262	4.74607	4.45933	4.26049	4.43214	4.29799	4.36654	4.34042	4.19432	3.84389	4.48925	4.23643	4.6589	4.5426	4.32259	4.28346	4.45933	4.17606	4.55201	4.3077	4.5475	4.48784	4.58047	5.24889	5.22318	5.24165	5.47458	4.88255	4.4695	5.7128	4.23124
GPC3	3.83519	4.24437	4.19612	4.16314	4.46386	4.33967	4.05164	4.6789	4.54637	3.89673	4.58954	3.72654	4.68754	4.70579	4.42026	5.05455	4.55201	4.89902	4.48635	4.44136	5.33228	4.71088	3.51747	3.92889	4.35295	4.61607	4.95738	4.41544	4.07442	4.77387	4.253	4.64861	4.56781	4.9527	4.37811	4.82436	4.69787	4.21233	4.40708	3.82317	3.88552	4.0155	4.21427	4.58411	4.50722	4.06713	4.32651	4.08679	4.40234
GPC4	5.79194	6.05829	6.44286	6.43112	6.41108	6.41388	6.84793	6.04491	6.45058	5.50663	5.88728	6.94608	6.62094	5.55954	7.70787	6.36624	6.47572	6.82304	6.66031	6.73379	6.47159	7.07357	6.68681	7.15822	6.05242	6.56537	5.58441	6.41451	6.26382	7.00832	6.26237	6.54626	6.43323	6.40436	7.24379	6.5025	5.7271	6.41288	6.26325	5.87928	5.66714	6.28279	6.20883	6.46214	6.44512	6.33663	5.2494	6.40101	5.99578
GPC5	2.94334	3.24273	3.2923	3.01348	4.20899	4.48498	2.98565	3.60308	2.95813	3.0004	3.01863	3.03928	2.94823	3.07216	3.1452	3.17854	3.18389	3.68308	3.5076	2.93737	4.28127	2.91927	2.84883	3.02933	3.11639	3.74135	3.16642	3.40867	3.50061	3.12105	2.98965	3.4648	3.0004	3.30728	2.93773	3.55815	2.79195	2.72582	2.76199	3.84043	3.67901	2.92498	2.81199	3.0333	2.95056	3.00489	2.83212	2.76756	3.22193
GPC6	7.97529	8.07286	8.62645	8.36837	7.61213	7.59171	7.48387	8.90792	8.39793	6.42366	7.46963	8.49765	7.09258	8.33034	7.74055	7.90762	7.06219	6.86484	7.15691	7.22659	7.39931	8.76677	7.19513	8.26669	6.97488	6.57511	7.54102	7.34814	7.03027	8.04134	7.23382	7.64066	7.33474	7.0154	8.74035	7.75378	8.10097	8.16041	7.22917	6.35959	6.32052	6.09033	5.23824	6.13503	5.27618	5.43336	5.65194	5.3779	8.25083
GRIA1	3.24399	2.97899	3.03232	3.12792	3.16999	3.26982	3.18517	3.03709	3.24313	2.92304	3.22472	3.0311	3.12695	3.17812	3.06443	3.37543	2.96768	3.10562	2.99771	3.06363	3.0415	3.20523	3.08209	3.01065	3.10476	3.05346	3.11098	2.91884	3.05756	3.1962	3.15208	3.20568	2.97548	3.1122	3.01986	2.87519	2.92895	2.98333	3.10434	3.08956	3.08558	3.30384	3.28528	2.95527	3.20311	3.11018	3.00353	3.08856	3.1462
GXYLT1	6.1466	6.04461	5.67649	5.48998	5.85824	5.54299	5.28147	5.59247	5.34716	6.20337	5.63454	5.43284	5.74477	6.18091	5.8725	6.33125	5.59821	5.39055	6.01746	5.23428	5.75696	6.03781	6.22569	5.16211	6.46966	5.50583	6.16226	5.53457	5.49101	5.5083	5.70742	5.59279	5.40082	5.15426	5.67206	5.7271	5.61017	5.6573	5.48572	6.72094	6.51485	5.079	5.34466	4.92594	5.09444	5.13878	6.33692	4.76318	5.89973
GXYLT2	7.27219	7.3237	7.85864	7.8007	7.76684	7.40073	7.81916	8.70684	7.94604	6.7158	8.00085	7.35036	7.98096	9.00119	7.68918	7.84337	8.31184	7.27813	8.32308	7.87155	7.86465	8.97881	7.92785	7.67973	7.78095	6.81991	8.43938	7.78038	7.12566	7.63965	7.29903	7.65606	7.30635	6.58831	8.87608	7.22877	8.03945	9.51993	7.57092	4.16059	4.5534	6.36084	6.20668	6.0387	6.12067	6.12793	5.7491	6.17093	8.41516
HCRT	3.21834	3.14556	3.26272	3.23303	3.09257	2.98947	3.12067	3.15817	3.27111	3.21525	3.01366	3.31484	3.07084	3.32128	2.88848	3.34578	3.31231	3.17629	3.21642	3.13805	3.04908	3.26352	2.93256	3.1423	2.9336	3.22723	2.96324	3.06058	3.24378	3.19558	2.92285	3.53093	3.13728	3.15632	3.18131	3.39029	3.24549	2.78429	3.28894	3.28439	3.33838	2.96163	3.26548	3.47552	3.28298	3.45175	3.36078	3.53643	3.17753
HEXA	5.9932	5.98973	5.98439	5.95947	5.8198	5.86669	5.88151	5.84464	5.94649	6.02423	5.89375	5.70542	6.07027	6.13132	5.93868	5.79394	6.20883	6.03346	6.22023	6.20883	5.79122	6.13885	6.19752	5.89756	5.91874	6.1242	5.77729	5.93547	5.95947	5.83966	6.02269	5.57245	5.82804	5.76709	6.44454	5.87115	6.04835	6.07786	5.88891	6.15623	5.9246	5.74528	5.69954	5.57487	5.90183	5.61213	6.12566	5.81498	5.9662
HEXB	10.5045	10.7187	11.0421	11.1881	10.6838	10.8349	10.7699	10.6793	11.0041	10.3681	10.6287	10.5813	11.1733	11.1508	10.5216	10.8202	11.3939	10.9482	11.357	11.3118	10.8825	11.4798	10.6476	10.4543	10.845	11.1218	10.6883	10.8935	10.9804	10.9421	10.845	10.8498	11.0557	10.9743	11.3855	11.016	11.233	10.8202	10.7755	10.1728	10.3763	11.0041	11.1589	10.9559	11.1733	10.7135	9.92032	11.2462	10.761
HGFAC	3.49787	3.55696	3.68045	3.33161	3.45589	3.52894	3.35843	3.70424	4.22039	3.60949	3.51322	3.61064	3.71174	3.75187	3.81908	3.67377	3.89117	3.8161	3.73341	3.76857	3.40714	3.63836	3.37862	3.66497	3.61923	4.08767	3.37111	3.69743	3.51301	3.31376	4.42056	3.28528	3.84844	4.41187	3.78167	3.47716	3.76607	3.48104	3.85668	3.40354	3.60117	5.53645	5.28462	5.41875	5.09636	5.43517	3.39574	5.41546	3.693
HID1	4.80381	4.75189	5.2112	5.17627	5.15833	5.28804	4.90129	4.65541	5.59247	4.73705	5.14167	5.28491	5.2909	5.1022	5.66771	4.66703	5.15149	5.51325	4.76318	5.10022	5.08865	4.86044	4.68167	5.18093	4.84453	5.8511	4.77897	4.90262	4.97577	5.33331	5.80922	4.78353	5.23452	5.39783	4.99297	4.79783	5.10737	4.85682	5.54671	4.84122	4.88821	6.54793	6.6971	6.27214	6.86775	6.59546	4.9061	6.54982	4.58047
HM13	5.81222	5.64648	5.56349	5.55471	5.70658	5.75252	5.74061	5.50663	6.00264	5.57108	5.65545	5.65679	5.72229	5.75443	5.84386	5.46321	5.50314	5.82458	5.37562	5.89869	5.47111	5.61729	5.97419	5.8781	5.58469	5.96875	5.5825	5.62303	5.69248	5.7362	6.01126	5.65891	5.77832	5.76878	5.91389	5.48861	5.77936	5.63111	6.11237	5.64048	5.5083	6.83891	6.66971	6.63749	6.70788	6.72582	5.58821	6.612	5.56482
HMGB1	10.5948	10.7755	10.66	10.6883	11.1081	11.0758	10.4504	10.7508	10.66	10.9621	10.8716	10.761	10.6095	10.7089	10.6647	10.9482	10.483	10.8349	10.6982	10.8143	10.9866	10.7916	10.5856	10.5342	10.7861	10.7916	11.0626	10.9421	10.9681	10.6287	10.6883	10.8033	10.7755	10.7187	10.729	10.6647	10.855	10.9308	10.8611	11.1955	11.2949	10.7558	10.8303	10.66	10.7135	10.7508	11.5335	10.5513	10.66
HSD3B1	2.71496	2.71704	2.60388	2.86003	2.61541	2.77363	2.68875	2.7201	2.69503	2.74544	2.72672	2.74097	2.68804	2.7213	2.86963	2.89128	2.83935	2.81323	2.61786	2.90027	2.75732	2.77311	2.7479	2.75704	2.76067	2.99439	2.75704	2.74818	2.73294	2.55337	2.88908	2.89728	2.65113	2.73469	2.75619	2.6974	2.79693	2.65883	2.71734	2.64023	2.97854	2.75901	2.88545	2.80203	2.88214	2.80629	2.74122	2.77065	2.65279
HSD3B2	2.90213	2.80326	2.79551	2.94481	2.75515	2.76995	2.80203	2.84471	2.84496	2.72997	2.73027	2.7213	2.84378	2.72822	2.80254	2.82738	2.85565	2.94708	2.78073	2.74423	2.71274	2.78304	2.8291	2.70841	2.8043	2.89836	2.73323	2.89596	2.76779	2.78227	2.74736	2.83113	2.90049	2.72071	2.86963	2.97034	2.9394	2.71146	2.64064	2.85433	2.70311	2.86506	2.9394	3.0004	2.92979	3.06502	2.82149	2.994	2.69708
HSPA5	9.35761	9.4587	9.08666	9.03565	9.07284	9.21938	9.27921	9.07284	9.44677	8.80514	8.72401	9.28779	9.31504	8.67044	9.48491	8.85539	9.17154	8.79631	8.98781	9.33935	8.6616	9.23996	9.10109	9.03565	9.21604	9.20818	8.94786	8.97601	9.02848	9.5708	10.4621	8.90667	9.08069	9.22123	9.29626	9.20148	8.94141	8.99739	9.64446	9.0472	9.02383	10.2138	10.1626	10.3432	10.3962	10.2301	8.57978	10.1626	8.62052
HSPG2	7.82845	7.67376	7.50822	7.8203	7.67203	7.96094	7.93029	8.15819	8.02583	7.24471	8.15188	7.292	7.81724	8.26193	8.14974	7.98805	8.15618	8.16654	7.81088	7.6704	8.18835	8.02583	6.82528	7.53269	7.61162	7.79705	8.15539	7.9272	7.71302	7.80373	7.57199	7.81916	7.84586	7.93621	8.39973	8.47251	7.69748	7.87986	7.72219	7.79529	7.62465	7.6621	6.96093	7.18968	7.51876	6.82134	6.44896	7.66706	7.97464
HTR5A	3.51747	3.55014	3.59102	3.94658	3.7073	3.81237	3.88858	4.13108	4.28287	3.93646	3.76607	3.71219	3.58294	3.90684	3.63881	3.75135	3.57549	4.13683	3.71944	4.24596	3.88628	3.6583	3.59833	4.09203	3.86115	3.9811	3.53689	3.40439	3.55696	4.05613	3.91781	3.49995	3.80422	3.87915	3.78886	3.53664	4.05584	3.70577	3.81336	3.83678	3.8365	4.09943	4.58706	4.47437	4.48984	4.11453	3.77057	4.89694	3.61403
HYOU1	8.41434	8.38313	8.12447	8.39378	8.22313	8.45333	8.50047	7.47408	8.78537	7.94849	7.94424	8.41162	8.54175	7.64453	8.5597	7.75378	8.37467	8.29134	7.66596	8.39641	8.14252	8.59577	8.09631	8.08602	8.63252	8.73483	8.58179	8.51666	8.31504	8.38137	9.42481	8.8302	8.30003	8.7057	8.51311	8.45649	8.10436	8.14469	8.81192	7.80483	7.78095	9.75559	9.90292	9.39419	9.78233	9.6396	7.52911	9.82019	7.81365
IL15	5.39502	5.55208	4.5461	4.42137	4.89244	4.79759	4.98469	5.27588	4.60455	5.47804	5.22269	4.90152	4.91254	4.56182	4.96348	5.20805	5.0259	5.15073	5.20724	4.83446	4.89986	5.20534	5.41922	4.41262	5.14167	4.70994	5.17408	5.1534	4.73794	4.72092	4.33064	4.53864	5.13599	4.76649	4.84371	4.67574	5.15962	5.14324	4.73768	5.8751	5.79842	3.50801	3.22864	3.59173	3.36841	3.31484	5.64127	3.51992	5.02957
INS	4.52279	4.89747	12.6683	12.1969	14.2027	14.1057	8.11076	14.4114	12.9011	5.15993	4.84122	4.75374	13.3813	14.1057	10.5856	14.9069	14.0023	12.3665	14.5683	14.7336	14.7336	11.9015	5.4336	11.6937	13.6051	13.4249	13.3143	12.715	10.8611	11.0421	14.3782	14.3782	14.3782	14.0023	4.48294	14.5683	12.1235	13.3366	13.1543	4.39294	5.24506	13.6335	13.3595	13.3143	13.1745	11.4798	5.60362	13.6335	4.73111
KCNJ2	8.95169	8.58983	6.02088	5.94059	6.14092	5.99808	6.34377	6.32086	6.11595	7.5496	6.53649	7.32236	6.04626	5.44057	6.31898	6.09492	7.00832	5.26882	5.72288	5.40326	5.65354	6.35443	6.08056	6.71405	5.73081	4.85682	5.48939	6.49311	5.78533	6.04024	4.5437	5.51277	5.58627	4.59707	6.26496	5.67761	5.35492	5.49023	5.93095	9.88394	9.60877	4.25243	4.01525	4.35094	4.28008	3.99244	6.49581	3.91147	7.02083
KDELR1	8.29134	8.57588	8.72401	8.77592	8.62152	8.45578	8.92374	8.25761	8.62052	7.92785	8.2761	8.48428	8.5544	8.85793	9.04151	8.5192	8.45812	8.88448	8.34214	8.74502	8.9286	8.75275	8.69054	8.5294	8.96925	8.90156	8.91295	8.60634	8.35522	8.78537	8.94272	9.03714	8.46741	8.80833	8.89064	8.69931	8.5778	8.62749	8.91518	7.76856	8.18546	9.31504	9.05296	9.08666	8.98019	8.89314	7.72398	9.20649	8.17366
KDELR2	9.92899	10.1268	10.0156	10.0005	9.83109	9.90592	10.288	9.47719	9.67637	9.06429	9.56452	9.92622	9.56452	9.32549	9.90592	9.07009	9.55143	9.81205	9.30753	9.55819	9.76295	9.69498	9.19823	9.98527	9.88709	9.93519	9.80477	9.65594	10.0558	10.0037	10.0591	10.1558	9.76054	9.82861	10.1268	10.007	9.67637	9.79463	9.73065	9.12422	9.20983	10.4621	10.3504	10.1112	10.1558	10.3644	8.62749	10.3026	9.43397
KDELR3	6.9639	7.00953	7.91206	7.79825	7.47358	7.33519	8.00016	6.92364	7.06584	6.75867	6.91984	7.62572	7.12019	7.11806	7.57709	6.44286	7.08187	6.85156	7.37237	6.95742	7.00711	7.18887	7.12019	8.00016	7.1757	7.10932	7.18086	6.71656	7.45006	7.05603	7.13641	7.79949	7.07936	6.9791	7.44077	7.21497	6.67898	7.43779	7.0388	5.7591	5.67626	7.59542	7.63398	7.73402	7.70029	7.76511	5.29939	7.08642	7.46036
KERA	3.01503	3.23423	5.26341	4.80155	4.02193	3.51505	4.64973	4.63538	3.06827	3.20172	3.29419	3.01884	3.65712	3.38031	3.90347	3.31605	3.38247	3.40651	4.40174	3.20172	3.40181	3.43099	3.06944	3.67139	3.80957	3.50863	3.88801	3.39179	3.71893	4.34757	3.26272	4.56433	3.35981	3.1728	3.46565	4.40905	3.09043	3.84148	3.26052	2.89791	2.65113	2.84761	2.84263	2.95571	2.8018	2.75646	3.01123	2.9811	3.09423
KRTCAP2	7.38047	6.91984	7.28309	7.25434	6.92439	6.69392	7.22613	7.06918	7.34998	7.17732	7.27314	7.1961	7.19391	7.62675	7.27956	7.14298	6.98345	7.31197	6.99534	7.01151	6.90276	6.8849	7.09055	7.16627	6.96475	7.35941	6.93254	7.1753	7.14508	7.14001	7.45776	7.23563	7.36312	7.32506	7.16456	7.25739	7.2415	7.05775	7.38676	7.35812	7.02907	8.35935	8.09893	7.93418	8.04743	8.03246	7.16879	8.01314	7.19784
LARGE1	3.64242	3.84581	3.97177	4.04995	3.90684	3.98749	4.17761	4.03998	4.21342	3.82134	4.00057	3.91467	4.03866	3.89515	3.80681	3.82505	3.96557	4.00029	3.8896	4.01637	3.99869	3.97554	3.75262	3.98218	3.84043	4.07913	3.90188	3.8631	3.8614	4.17469	4.08107	3.96779	3.94035	3.9761	4.17441	4.02732	3.90216	4.01039	4.04296	3.9811	3.90241	3.87344	4.16037	4.04747	4.54224	4.36206	3.96529	4.27378	3.88677
LARGE2	5.8951	5.51113	5.75936	5.9592	5.51352	5.93749	5.74964	5.3779	6.3995	5.90671	5.65271	5.73133	5.80005	5.9938	5.78368	5.56209	5.7038	6.14994	5.61698	5.91541	5.63083	5.42606	5.68055	5.576	5.19324	6.25811	5.2112	5.51092	5.49048	5.5841	7.11934	5.37661	5.9145	6.23665	6.00875	5.47642	6.07852	5.4038	6.30453	5.40192	5.29396	7.66331	7.58636	7.63682	7.49358	7.43338	5.57798	7.80128	5.46132
LFNG	5.76796	5.60393	5.82428	5.80479	5.70604	5.62516	5.28087	5.21523	6.01464	5.42685	5.74994	5.68977	5.66496	5.65595	5.65107	5.52344	5.54433	6.05548	5.40719	5.55793	5.50162	5.60445	5.7437	5.85491	5.65329	5.95458	5.85768	5.41901	6.39213	5.92519	6.29842	5.63425	5.76796	6.02559	5.50583	5.54299	5.99779	5.57933	5.94119	5.25932	5.41973	6.9386	6.59163	6.84793	6.78354	6.48242	5.34738	6.83217	5.65702
LGALS3	8.19356	8.05264	8.89555	8.93096	9.49287	8.93997	9.25101	8.6102	8.29752	8.32948	8.58502	10.0656	8.5838	8.73271	8.60912	8.4203	8.55346	8.51129	9.30101	8.23038	8.6465	8.31746	9.41436	8.98406	9.53162	8.83804	8.68748	8.77592	9.3906	8.70999	8.24706	8.71216	8.60912	8.78537	8.66377	9.29626	8.60063	8.4878	8.65436	7.80842	7.56975	7.74584	7.68308	8.02377	7.88469	7.76568	8.06935	7.57462	8.45253
LHB	5.15993	4.64239	4.93967	4.68193	5.01566	4.91054	4.7007	5.12564	5.47642	5.11733	5.06216	5.1848	5.12838	5.5329	4.8839	4.94377	5.01757	5.31033	5.06454	4.99008	4.73463	4.63345	4.85933	4.71149	4.80926	5.14667	5.02298	4.75814	5.11085	4.56868	5.2596	4.91582	4.83234	5.01538	4.71869	4.52165	5.12594	4.78548	5.43207	4.73933	4.75347	6.56287	5.98277	6.20046	5.93467	5.98579	5.07394	6.11472	4.8839
LIN28A	2.94421	3.28505	3.05955	2.95712	3.07178	3.21855	3.03589	3.31711	3.05068	3.03068	3.11381	3.26138	3.09296	3.24549	3.062	3.12067	3.09529	3.05087	3.42704	3.01659	3.19659	3.13169	3.31124	2.99597	3.14295	3.19156	3.14378	3.16795	3.26796	3.20233	3.02118	3.35309	3.11639	3.04908	3.05895	3.09572	3.14295	3.09912	3.18616	3.20446	3.11836	3.21218	3.21484	3.23876	3.04028	2.79475	3.20816	3.12283	3.07969
LMAN1	7.63282	7.97855	7.2849	7.6791	7.29254	7.59864	7.1541	7.29587	7.96997	7.14001	7.40568	7.67809	7.60191	7.17029	7.95533	6.87293	7.48075	7.72052	7.17864	7.94547	7.54839	6.97949	7.91138	8.55856	7.11134	8.06537	7.3477	7.49259	7.40073	6.11564	8.13481	7.44751	7.54635	7.63004	7.4706	6.44419	7.66541	7.63734	7.83515	7.33889	7.24904	8.65541	8.97452	8.6485	8.97452	8.91907	7.08939	8.6112	7.39881
LMAN1L	4.3814	4.18389	4.02994	4.07304	4.19142	4.20597	4.17581	4.25485	4.07613	4.36288	4.106	4.39238	4.17581	4.42937	4.08022	3.94952	4.12548	4.46676	4.02809	4.13301	4.0155	3.91753	3.86507	4.2446	4.20899	4.4695	3.7312	4.13108	4.14262	4.04437	4.39974	4.13325	4.10162	4.26462	4.42767	4.16201	4.07011	4.09801	4.01201	4.17365	4.44748	4.54343	4.30026	4.82208	4.89441	4.24408	3.94875	4.50471	4.27673
LMAN2	5.74477	5.72492	6.04265	5.80922	5.89534	5.90504	5.90954	5.67761	5.87593	5.70208	5.78368	5.98948	5.84332	5.81777	6.22778	5.52445	5.91726	5.97419	5.78675	5.83743	5.69406	5.95127	5.87703	6.08973	5.91173	5.98099	5.8212	5.84412	5.904	5.87729	6.1857	5.76509	5.93664	5.90928	5.83333	5.73108	6.01464	5.81087	5.94851	5.76452	5.74882	6.83926	6.5067	6.65273	6.4634	6.5348	5.80617	6.27524	5.70716
LMAN2L	6.57579	6.30421	6.52079	6.38636	7.02404	6.9139	6.68516	6.53915	6.43223	6.33435	6.57	6.49279	6.81991	6.86371	6.95628	6.95129	6.87107	7.18477	7.05525	6.99047	6.83005	6.4378	7.16755	7.1421	6.64839	6.98146	6.59234	6.76251	6.40041	6.77387	6.94938	6.73766	6.81921	7.09217	6.74759	6.88152	6.26797	6.66971	6.84686	6.59055	6.5067	7.23772	7.40221	7.39488	7.4294	7.57041	6.24829	7.31707	6.49902
LRPAP1	6.21723	6.03582	6.03694	5.87485	5.90558	5.94348	5.5566	5.94406	6.0149	5.83167	5.96026	5.87783	6.22842	6.14248	6.03639	5.90504	6.17725	5.84223	5.90585	6.06938	6.01346	6.16601	6.57	5.8956	5.65301	5.64847	5.66771	5.74553	5.88863	5.66853	6.07256	5.71808	5.89046	5.83027	6.0877	5.86669	5.84135	5.8519	5.86411	5.62086	5.47358	6.45283	6.38395	6.81738	6.55087	6.17189	5.65221	6.47347	5.82399
LUM	10.6381	10.6429	11.6474	11.6219	11.0949	10.9866	11.2862	12.0823	10.5426	10.0623	11.635	10.108	11.2462	12.2177	10.8498	11.871	11.1733	11.0421	11.3118	11.4234	11.8422	11.2949	9.82019	10.8985	10.7813	10.5856	11.6219	11.357	11.32	11.5653	10.7401	11.3301	11.1955	10.7699	11.9787	11.857	11.7439	12.044	11.016	6.28013	6.30804	9.01439	8.84256	8.72173	8.66556	8.90667	9.60203	8.40233	10.9681
MACO1	6.20452	6.57609	6.53614	6.52727	6.72406	6.60515	7.38337	6.37025	6.45318	6.48688	6.13797	6.26681	6.59199	6.13976	6.49581	6.12594	6.34892	6.61373	6.78858	6.75661	6.71132	6.5896	7.2326	6.94536	6.37329	6.53882	6.69566	6.711	6.59679	6.29676	6.97047	6.77215	6.55711	6.47667	6.63719	6.99444	6.29333	6.63095	6.66336	6.17064	6.57511	6.59679	6.88264	7.36024	7.09018	7.0712	6.82752	7.1765	6.32937
MAGT1	8.83591	8.63659	8.56919	8.44455	8.59086	8.45732	8.83359	8.58278	8.89189	8.42465	8.45414	8.70684	8.67518	8.30634	9.00945	8.40062	8.57025	8.60912	8.53513	8.74261	8.40488	8.44272	9.03861	8.9466	8.41076	8.66648	8.37894	8.52098	8.30259	8.72401	8.88823	8.52749	8.68098	8.84503	8.46741	8.63759	8.58983	8.61877	9.06153	8.50047	8.43161	9.29626	9.67397	9.25284	9.23292	9.23292	8.47965	9.35574	8.17801
MAN1A1	7.80428	7.95464	8.32208	8.69826	8.25761	8.4134	7.96997	9.46056	9.16997	8.50317	8.84503	8.07653	9.00945	9.18857	8.17669	8.74624	8.59275	9.01978	8.39551	8.80093	8.48428	8.441	7.45148	7.96875	8.09631	8.97452	8.42911	8.52839	7.9272	7.2621	9.61312	8.40488	8.83252	9.11647	8.4203	8.06469	8.74144	8.81565	8.91163	8.54564	8.55546	8.68533	8.77122	8.81565	8.92245	9.01846	9.27566	8.83804	8.80833
MAN1A2	5.08321	5.11456	5.11057	5.09828	4.87874	4.80705	5.05856	5.054	5.23875	5.19967	4.94134	5.12594	5.21492	4.96014	5.04364	4.98528	5.1553	5.011	5.09967	5.29556	5.07122	4.92381	5.15313	4.90719	4.98148	5.44219	5.0804	5.04956	4.94619	4.7333	5.5825	4.96476	5.08595	5.16183	4.86695	4.94209	5.08651	5.03039	5.38054	5.16046	5.0715	6.07749	6.04598	5.991	6.08973	6.28838	5.058	5.63967	5.07721
MAN1B1	6.88086	6.84651	6.79291	6.98418	6.58896	6.92794	7.45148	6.87784	6.91984	6.64149	6.73174	6.80749	6.86523	7.00792	7.07978	7.11601	6.87818	6.97566	6.84504	6.93749	6.95508	7.21933	7.32679	6.95393	6.82095	6.78748	7.11892	7.01454	6.89306	7.44908	6.76996	6.71832	6.87107	6.85305	6.97212	7.07	7.13906	7.12019	6.82167	6.77138	6.74334	7.05379	7.18644	7.00393	7.04921	6.78424	6.6246	7.21544	6.99047
MAN1C1	6.38199	6.28103	6.47508	6.25106	6.69078	6.42854	6.22929	7.63061	6.52894	6.61268	7.33083	5.6857	6.61959	7.78729	5.50937	7.55214	6.94899	6.62365	6.99121	6.88118	7.92292	6.86847	5.31331	5.43412	6.66162	6.44034	7.11723	6.18292	6.48529	6.43873	6.21581	6.78354	6.59023	6.53742	6.73517	7.77744	6.78493	7.14126	6.58438	7.32506	7.23043	5.10582	4.95521	4.7965	4.9582	4.59278	7.03235	5.17044	6.81045
MAN2A1	7.87693	7.84521	8.22966	8.38897	7.79166	7.93091	8.45253	8.48346	8.57411	8.30328	8.11076	8.3334	8.44906	8.11004	7.8203	8.45333	8.49415	8.48428	8.33883	8.65151	8.27296	8.43431	7.91522	7.87986	8.06935	8.66556	8.09696	8.17001	7.98737	7.76215	8.83591	8.47165	8.41603	8.49947	8.26908	8.08537	8.49674	8.30787	8.48155	8.0821	8.15325	8.86385	8.99177	9.341	9.38874	9.29303	8.37003	9.09073	8.07576
MAN2A2	6.31081	6.06772	6.23236	6.09611	6.15893	6.3799	6.34283	6.64662	6.98614	6.73693	6.43323	6.24337	6.77891	6.49218	6.5107	6.82167	6.5724	6.53774	6.40829	6.67286	6.61469	6.61501	6.29193	5.95776	6.07197	6.73107	6.38859	6.34313	6.54595	6.19784	6.93637	6.33563	6.58863	6.85805	6.64014	6.71656	6.46999	6.51324	6.76009	6.76961	6.76857	7.10644	7.28119	7.09898	7.30831	6.85649	6.83557	7.55427	6.61899
MAN2B1	8.26986	8.35264	7.90113	7.83821	7.92528	8.03945	7.89843	8.02113	8.04875	8.31027	8.32948	7.44077	8.14123	8.2396	7.81607	8.13826	8.21339	7.98805	7.83091	8.17439	7.44206	8.70999	7.83151	7.63573	7.71877	7.68975	8.20229	7.68918	7.7363	7.59428	7.97855	7.86404	8.13192	7.557	8.19211	7.79705	8.51417	8.10097	7.73568	8.61299	8.64227	7.47915	7.67145	7.87986	7.94245	7.94194	8.3404	8.36258	8.2659
MAN2C1	5.38003	5.24616	5.5237	5.42734	5.45064	5.23824	5.58793	5.5386	5.72201	5.47511	5.58793	5.58928	5.70688	5.57084	5.58903	5.5659	5.84603	5.45033	5.43734	5.64731	5.57987	5.55444	5.48488	5.6407	5.52183	5.71082	5.49356	5.35181	5.45364	5.43434	6.00614	5.41009	5.44901	5.64451	5.47537	5.42916	5.56971	5.44349	5.79481	5.48047	5.45918	6.40736	6.14904	6.01045	5.96991	5.92843	5.611	6.0877	5.45459
MANEA	4.96397	5.03584	5.22318	5.31543	4.82896	4.75673	4.37428	4.76756	4.45425	4.94733	4.63797	5.38997	4.75189	4.39321	4.99111	4.76955	4.51513	4.78608	4.61668	4.46067	4.5779	4.59221	5.08174	5.07231	4.99348	4.50804	4.77929	4.6993	4.70011	4.37428	4.52846	5.3608	4.65619	4.56101	4.83284	4.37097	5.00317	5.00344	4.34822	5.25257	5.05771	4.22784	4.42056	4.83394	4.46443	4.27288	5.44192	4.17685	4.82631
MAPK1	6.65273	6.66336	6.28192	6.40373	6.3587	6.52505	6.35225	6.57166	6.66625	6.71724	6.52209	6.50838	6.512	6.59092	6.24856	6.38829	6.43418	6.4276	6.33184	6.44075	6.07115	6.35225	6.74555	6.54626	6.35814	6.47033	6.48273	6.20483	6.38395	6.01777	6.33913	6.34496	6.42301	6.27614	6.18181	6.05575	6.55906	6.41176	6.41288	6.78894	6.78455	6.39213	6.59907	6.48559	6.76289	6.62632	6.71691	6.53419	6.64347
MAPK3	7.62895	7.36447	7.59226	7.7096	7.77188	7.68694	8.10297	7.62948	7.85685	7.7634	7.88169	8.03314	7.65329	8.22464	7.71529	7.85982	7.67973	7.99256	7.62361	7.542	7.95406	7.55014	7.17196	7.76106	7.69356	8.06935	7.81486	7.90634	8.06469	7.94194	8.0507	7.82542	7.53526	7.81553	7.56827	7.54337	7.65661	7.61847	7.80842	7.71931	7.49408	8.37634	8.37634	8.16178	8.03945	8.16654	7.70137	8.23452	7.60302
MCFD2	6.71477	6.59163	6.40464	6.30421	6.34651	6.18427	6.12034	6.66373	7.13468	6.30015	6.52269	6.64531	6.70323	6.55223	6.61404	6.31735	6.50155	6.38112	6.28685	6.53846	6.33528	6.34464	6.62235	6.54693	6.06911	6.91036	6.50429	6.31457	6.27034	6.30961	7.24241	6.39332	6.21	6.42949	6.12734	6.10646	6.14725	6.49515	7.05485	6.69324	6.5398	8.05264	7.98162	8.37554	8.40062	7.93621	6.49086	7.99683	6.41823
MGAT1	8.21414	8.17801	7.56078	7.97597	7.6434	7.9057	8.37003	8.01314	8.12649	7.94363	8.01442	7.84836	8.08008	8.56838	7.87465	7.86644	7.97733	8.00282	7.49709	8.06326	7.64014	8.5294	7.7965	7.96814	7.9834	7.8709	8.1505	7.77297	8.08139	8.06469	8.07083	7.77078	7.82785	7.82909	8.62455	8.03881	8.38488	8.02915	8.01442	8.33578	8.45492	8.25244	8.38897	8.02722	8.16932	8.33578	8.27296	8.5576	8.03811
MGAT2	6.99011	7.30221	7.25303	7.19086	7.18968	7.20185	7.19135	7.07	7.47712	7.14773	7.11051	7.24379	6.9594	6.96183	7.17106	6.62921	6.85884	7.14604	6.78632	7.1707	6.90773	7.15457	7.38874	7.29587	7.26915	7.5454	7.24513	7.19348	7.15739	6.64412	7.70465	7.1699	7.26781	7.106	7.27314	6.94045	7.44602	7.31574	7.30183	7.02602	7.26565	8.02169	7.88169	8.11881	8.11749	8.18482	7.32679	8.04603	7.07641
MGAT3	4.61638	4.25513	4.72972	4.58569	4.8454	4.87874	4.64156	4.64128	4.89552	4.62845	4.9061	4.78222	4.70041	4.64181	4.76318	4.57396	4.61868	4.85089	4.2977	4.93497	4.87059	4.47824	4.33687	4.7499	4.55364	5.02984	4.55201	4.56211	4.93741	4.87303	5.03014	4.62755	4.53127	4.77953	4.76899	4.66175	4.9249	4.65432	5.02161	4.57703	4.46786	5.48405	5.59357	5.12402	5.83471	5.60543	4.54924	5.44028	4.50112
MGAT4A	5.50607	5.68295	5.55344	5.41369	5.86785	5.7848	5.66217	5.87928	5.7163	6.24279	5.72741	6.03906	5.97368	5.6541	5.57933	5.63967	6.08854	5.91671	6.15118	6.31394	5.21681	6.1779	6.04292	5.5833	5.99578	6.02699	5.99435	5.57687	5.62061	5.3693	6.17913	5.44951	5.85908	5.7373	6.03061	5.09416	5.75443	5.8902	5.98156	5.17867	5.31382	6.7907	6.64733	6.54825	6.37425	6.10953	6.52505	6.12508	6.0743
MGAT4B	8.12714	8.28329	8.81432	8.82156	8.86644	9.01702	9.29131	7.77799	8.08602	8.24643	8.63036	9.05163	8.5228	7.94726	9.46862	8.08894	8.33426	9.5375	8.3319	8.2761	8.78414	8.69383	8.81911	9.19496	9.27566	8.89555	8.49415	8.98908	9.26279	8.90287	7.80428	8.92245	8.50229	8.99456	8.80205	8.84133	8.73167	8.48428	8.29752	8.00416	8.10793	7.72743	8.06537	7.86404	8.2532	7.99632	7.63848	8.26359	8.1546
MGAT4C	2.96893	2.8028	2.89148	2.80405	2.69224	2.77522	2.63977	2.96875	2.91308	2.66467	2.76655	2.94787	2.71527	2.74179	2.80554	2.98443	2.94842	2.72822	2.87012	2.79475	3.01246	2.90647	2.78383	2.69189	2.82476	2.63452	2.74983	2.73502	2.83542	2.70901	2.79248	2.88781	2.7962	2.76409	2.64729	2.76329	2.65694	2.77142	2.80048	2.61496	2.63252	2.61445	2.69639	2.81538	2.55157	2.58909	2.74423	2.61301	2.66467
MGAT4D	2.57734	2.58389	2.68057	2.70841	2.56471	2.53233	2.60797	2.49819	2.60243	2.63335	2.52183	2.65514	2.6469	2.6984	2.61402	2.80376	2.5714	2.85756	2.80104	2.75619	2.59125	2.86644	2.60291	2.43293	2.73323	2.62636	2.6874	2.63075	2.51494	2.8857	2.52384	2.75758	2.65037	2.60501	2.55773	2.562	2.56403	2.73092	2.57986	2.56265	2.66499	2.44563	2.62032	2.74261	2.51269	2.776	2.57844	2.60797	2.65883
MGAT5	5.76593	5.43786	5.53729	5.58094	5.81609	5.75857	5.78893	5.95293	5.83999	6.05421	5.97273	6.06372	5.80236	6.08456	5.81141	5.78503	5.77285	5.97936	5.49829	5.81498	5.81277	5.66853	5.65784	5.92058	5.81247	6.08082	5.59305	5.7677	6.05005	5.64511	5.78368	5.8198	5.91569	5.80645	5.84658	6.00729	5.93634	5.68514	6.14545	5.91306	5.7979	6.08739	6.03781	5.96276	6.1481	6.14931	6.17251	6.29584	5.87618
MGAT5B	3.80681	3.62813	3.87317	3.63239	3.86447	3.63598	3.52092	3.86915	4.01691	3.62886	3.87563	3.37171	3.98615	3.83034	3.82287	3.65109	3.6788	4.07913	3.71461	3.91753	3.61328	3.45418	3.80474	3.79406	3.55996	3.93264	3.65615	3.74162	3.75462	3.62537	4.17178	3.64413	3.80777	3.87671	3.90111	3.54312	3.8471	3.79017	4.11428	3.48742	3.69765	4.92703	4.07192	4.84371	4.23217	4.48101	3.62954	4.80902	3.64529
MIA2	4.34289	4.44997	4.85876	4.98387	4.85708	4.99485	5.27454	4.55175	4.63508	4.65001	4.63036	4.8073	4.94646	4.65516	5.13928	4.7468	4.94109	4.96092	5.04688	5.09636	5.05503	4.83693	4.81154	5.04119	5.09502	5.28804	4.88019	5.30699	5.13406	4.80214	4.92512	4.89415	4.8454	5.08012	4.84708	5.08678	4.72706	4.82789	4.72477	4.54032	4.64406	4.91582	5.00965	5.09474	5.15582	5.03959	4.64777	5.0691	4.45078
MIA3	6.56411	6.6313	6.95051	7.08559	6.33528	6.40954	7.03284	6.68907	6.73837	6.5801	6.44966	6.53846	6.52505	6.38702	6.63339	6.95896	6.68907	6.65962	6.5835	6.66936	6.87853	6.55395	6.17189	6.61017	6.83739	6.9013	6.54825	6.58924	6.65313	6.43621	7.0968	7.22877	7.02248	6.78178	6.70897	7.00551	6.82894	6.68172	6.82642	6.55557	6.53808	7.2326	7.35172	7.36312	7.57856	7.5735	6.52116	7.4786	6.40767
MLEC	8.16932	8.12037	8.86778	8.87278	8.49327	8.49765	7.99324	7.88283	8.41946	7.9635	8.21568	8.73271	8.25083	8.11478	8.56161	7.98867	8.49837	8.36755	8.00937	8.29913	8.28965	8.44455	8.03525	7.95714	8.26015	8.97741	8.54877	8.11617	7.74647	8.15893	8.74624	8.64567	8.054	8.19063	8.54175	8.28635	8.16573	7.92973	8.52558	8.00085	7.98273	9.341	9.28269	9.15886	9.13024	9.12422	7.52791	9.28095	8.02722
MOGS	6.8126	6.47382	6.75398	6.52209	6.48849	6.34961	6.84544	6.18153	6.24133	6.64967	6.48459	6.96898	6.45456	6.44863	6.65757	6.52665	6.58696	6.45283	6.41725	6.04078	6.04917	6.41725	6.98653	6.56319	7.07435	6.54555	6.41354	6.55812	6.54181	7.1961	6.89306	6.60819	6.18964	6.52181	6.87673	6.72161	6.48303	6.22685	6.63749	6.49351	6.32086	7.64066	7.13114	7.34481	6.66791	6.83739	6.42633	6.84833	6.51642
MPDU1	5.44349	5.29608	5.2981	5.38414	5.22634	5.18323	5.34869	5.14144	5.44515	5.32132	5.36543	5.45736	5.52519	5.43653	5.26121	5.03305	5.34016	5.30617	5.2675	5.49203	5.13406	5.13272	5.34414	5.44219	5.15073	5.52239	5.24889	5.31517	5.17867	5.1401	5.49774	5.05375	5.18428	5.35361	5.4024	4.93382	5.37036	5.35977	5.02209	5.4271	5.36569	5.76796	5.77859	5.46052	5.37921	5.67052	5.34869	5.56482	5.40663
MPI	4.93204	4.84402	4.66175	4.62526	4.63152	4.55537	4.8755	4.65106	4.73821	5.16653	4.75701	5.14667	4.52713	4.96958	4.83284	4.90804	4.77066	4.47272	4.74106	4.5794	4.74077	4.87602	5.38672	5.34894	4.56893	4.60129	4.65106	4.84428	4.85792	4.91284	4.78686	4.63993	4.4132	4.71584	4.66816	4.83925	4.66703	4.5785	4.6469	5.08651	5.04924	4.69418	5.282	5.08095	5.26423	5.27618	4.68836	5.32025	4.6365
MT3	4.93062	4.65918	4.53637	4.87248	4.52554	4.94704	4.8401	4.76649	5.50446	4.75591	4.47207	5.08595	4.92677	4.99324	4.71812	4.45933	4.68059	5.16125	4.93146	5.18537	4.32544	4.37759	4.68725	4.90476	4.62869	5.26341	4.56211	4.97987	4.65674	4.77953	5.35463	4.56608	4.9527	5.44219	5.01807	4.72673	4.81957	4.78199	5.42223	4.68861	4.39844	6.40829	6.19416	5.81169	6.30015	6.45613	4.69844	6.38547	4.47766
MTTP	2.61638	2.7984	3.28334	3.14418	2.59973	2.80652	2.62591	2.63287	2.66611	2.67781	2.94067	8.45732	2.75237	2.9394	2.77224	2.58731	2.97668	2.76383	2.64152	2.71888	2.8582	2.8917	2.94067	2.74261	2.78894	2.78153	3.32687	2.59388	2.65037	2.63669	2.881	3.46918	2.60126	2.71237	2.75539	2.6884	2.77195	2.78845	2.68301	2.62979	2.69159	2.90173	2.60126	2.82883	2.60985	2.61939	2.74764	2.62881	2.6848
MUC1	7.44454	7.21758	9.73844	10.0408	8.51216	8.81801	11.4123	7.35766	8.79406	8.52472	7.41743	8.4074	7.5756	7.09428	9.69498	5.80729	8.3501	9.23996	7.83213	7.41227	9.53543	7.7959	8.3633	9.5974	9.97895	9.31119	8.08537	9.7129	10.3103	9.77024	9.39238	10.8253	9.85754	9.95582	9.35206	10.6793	8.68317	7.48336	8.49592	5.6189	5.42325	9.90292	10.0309	9.53345	9.7129	9.52485	5.56118	10.4125	8.32703
MUC12	3.20429	3.22884	3.37029	3.39073	3.53579	3.58851	3.3224	3.43204	3.17064	3.1541	3.16874	3.65257	3.33417	3.46503	3.2917	3.47335	3.47154	3.46457	3.3224	3.39554	3.15921	3.50976	3.19558	3.13209	3.22111	3.41234	3.35096	3.41001	3.37002	3.39073	3.12748	3.2923	3.20088	3.30102	3.37464	3.29529	3.40439	3.36743	3.33999	3.52092	3.2531	3.35225	3.50801	3.13878	3.45951	3.31005	3.27891	3.32304	3.50084
MUC13	5.30217	5.10951	9.30252	8.88208	7.84836	7.8604	10.292	5.86018	5.63287	5.83222	6.41451	9.22778	6.27614	6.75293	6.10091	5.8706	6.79918	6.05033	6.10761	6.45773	7.69535	5.70831	5.6047	5.71886	8.44557	7.9913	6.91189	7.34431	9.40738	8.56556	6.29989	9.1119	7.00122	6.8549	8.4326	8.73706	5.50744	6.3951	6.21143	5.35181	5.21867	6.2971	5.81582	5.94089	5.75021	5.95184	5.37921	6.0623	5.72344
MUC15	3.16333	2.94272	3.0874	3.15513	3.62605	3.55347	3.64551	3.3205	4.15205	3.04948	2.89749	3.05366	4.27232	3.02912	3.97871	3.2913	5.41546	5.23586	6.37025	6.06742	3.73143	3.73469	3.14901	3.54712	4.02271	4.68725	3.16544	3.9439	3.24123	3.48513	4.76203	4.0093	4.10023	4.08819	3.02062	2.93837	3.06257	3.51281	4.20465	3.07325	3.22948	5.01312	5.29634	4.87059	4.71395	4.96148	3.0874	4.41802	3.26631
MUC16	5.78247	6.05771	4.28992	4.3979	3.95629	3.77891	8.0626	3.57527	3.34268	3.8598	3.53492	4.5785	3.78608	3.50393	4.23894	3.64885	3.71197	4.76509	4.38782	3.46013	4.43839	3.66836	4.95851	7.99575	4.88099	3.03192	3.4808	5.24889	6.14964	5.424	3.14989	3.61479	3.82924	3.42421	3.55677	5.12623	3.18693	4.18361	4.02407	3.55036	2.99101	3.55749	3.38095	3.83572	3.24039	3.53579	3.06018	3.5404	4.51602
MUC17	4.32957	4.03779	5.06342	5.39055	6.0518	6.43686	4.21453	4.17658	4.12671	4.25784	5.56323	6.05299	4.32398	4.4107	4.17821	4.83025	4.715	5.1727	3.99075	4.55478	5.08202	4.10931	4.05111	3.98297	5.07287	5.5191	4.21787	5.27244	6.11408	5.93269	4.16838	6.11377	4.46533	5.40768	4.25273	5.43919	4.71118	4.0747	4.75701	4.38553	4.13958	4.93304	4.94733	4.82127	5.11572	5.18169	4.15205	4.13797	4.06037
MUC19	2.86248	2.85798	2.65433	2.88359	2.87223	2.86456	3.1205	2.75732	3.26033	2.94025	2.82229	2.84081	3.17245	2.81514	2.94925	2.57375	2.92809	2.94989	2.71496	2.91475	2.85338	2.844	2.93793	2.70586	2.93755	3.05178	2.94887	3.21564	2.8926	2.9394	2.83963	2.93554	2.71465	3.30987	2.84125	2.76995	3.00738	2.85094	2.92959	2.93153	2.91264	3.1545	3.03192	3.09689	2.83113	3.08392	3.03885	3.31067	2.97175
MUC2	3.86062	3.77509	3.73781	3.82206	3.79379	3.78167	3.88168	3.58342	3.84762	3.78443	3.76125	5.79976	3.7419	3.77335	3.29295	4.4771	3.90496	3.71993	3.65519	3.77891	3.62486	3.72654	3.6303	3.67525	3.82317	4.12033	3.61375	3.71174	3.91698	4.83118	3.89069	3.83863	3.78443	3.47823	4.61785	3.45951	3.68203	3.76275	3.67471	3.66694	3.49563	3.78682	4.19562	3.84389	3.94035	3.91121	3.77335	3.96722	3.54779
MUC20	4.75843	5.04337	7.34389	7.3237	6.62334	6.41259	7.61162	5.99723	5.8728	6.23637	6.13307	6.23048	6.91835	5.01831	6.35167	5.05771	6.7999	6.93254	6.46747	6.52605	6.72437	6.10701	6.03836	6.75293	7.8418	6.89896	5.90731	6.97603	7.43485	7.68366	6.21089	7.35172	6.4938	6.32341	5.57189	7.78038	5.15887	6.01659	6.04683	4.66593	4.91773	5.71858	5.57389	5.96307	6.36084	5.8519	5.3232	5.89893	5.68514
MUC3A	3.39904	3.41558	3.46873	3.60902	3.38159	3.5577	3.59102	3.50061	3.84415	3.38291	3.42175	3.48628	3.52438	3.56461	3.35958	3.25015	3.30296	3.58952	3.21834	3.66861	3.32325	3.30898	3.43264	3.60208	3.55947	3.7506	3.30898	3.41495	3.64618	3.71717	3.51301	3.34408	3.65042	3.55723	3.64193	3.50932	3.49628	3.54017	3.62352	3.22966	3.40034	3.88653	4.15423	3.99951	4.47605	4.09141	3.29828	3.90525	3.48604
MUC4	4.38692	4.46359	4.67015	4.88486	5.19563	5.41253	6.5025	4.10356	3.9683	5.04392	4.06477	4.82065	4.15979	3.82558	4.13301	3.76197	4.1068	4.06907	4.1572	3.93378	5.57025	4.14372	4.93713	4.12751	5.96815	4.45904	4.08482	6.41889	6.1115	5.26369	4.4963	4.8085	4.19769	4.03973	4.23248	5.79146	3.85492	4.30357	4.19965	4.15143	4.21207	4.35383	4.14595	4.2807	4.43439	4.35668	3.99348	4.27541	5.25476
MUC5AC	4.7877	4.72706	8.57233	8.44641	5.07314	5.14434	7.94363	4.57586	5.40768	4.72998	6.16541	5.66293	4.86895	4.69844	5.01074	4.47633	4.77953	5.85164	5.06884	5.17378	6.73275	4.78825	5.0143	5.46294	7.71471	7.93218	4.9207	5.18376	6.801	6.55223	5.30481	8.14123	5.74584	5.79065	7.47915	7.5459	5.24062	5.04392	5.10333	4.71923	4.68433	5.93148	6.02585	6.32468	6.45128	6.26237	4.70413	6.08399	4.84261
MUC5B	4.06398	4.25103	5.24992	5.12223	5.42685	5.57902	6.85452	4.90101	4.24113	3.90496	3.97121	4.0895	4.43349	4.59846	4.17581	4.27512	5.38102	4.69873	4.67153	4.22395	6.07197	4.07357	4.74366	6.15924	5.7102	5.92309	4.95194	4.63345	6.9247	6.34157	4.51602	6.97676	5.4307	5.02161	6.32628	6.5401	4.0843	4.22121	4.53917	4.19456	4.03319	4.47605	5.30066	4.34734	5.03908	4.67758	4.40619	4.67494	4.21129
MUC6	4.56375	4.49349	5.45814	5.57389	4.76926	4.71731	4.52416	4.76679	5.11863	4.3623	4.43022	7.75378	4.64324	4.64354	5.60152	4.44162	5.75717	6.29807	4.9139	5.85021	6.42917	4.1967	4.65374	4.78171	4.63993	5.61187	4.32051	5.47833	4.62119	4.91744	5.82309	5.59122	5.44028	6.58438	7.48811	4.61638	5.01731	4.72308	5.61675	4.414	4.44886	6.06684	5.69822	5.94985	5.87308	5.18246	4.39548	5.63371	4.45305
MUC7	2.7201	2.96101	2.8486	2.87289	2.68603	2.74653	2.85338	2.74393	2.75674	2.81274	3.00841	2.89836	2.88121	2.79893	2.93737	2.81843	3.01103	2.85201	2.84951	2.68057	2.9891	2.74902	3.0487	2.81247	2.63215	2.88759	2.90729	2.91564	2.91846	2.72914	2.87199	2.8745	2.76779	2.76711	2.74313	2.88167	2.75488	2.82353	2.75851	2.97155	2.98625	2.82094	2.90134	2.93318	2.86407	2.72967	2.82738	2.82252	2.83113
MUCL1	4.33194	4.23975	3.46085	3.6162	3.26293	3.22281	3.53643	4.00324	3.59525	3.38983	3.67928	3.67353	3.48427	3.6341	3.33525	3.44019	3.99244	3.32347	3.39796	3.46332	3.2661	3.30877	3.59102	3.17503	3.42217	3.47781	3.18634	3.73394	3.60878	3.31294	3.46961	3.21772	3.31294	3.4139	3.61306	3.51527	3.6362	3.50255	3.46728	3.68668	3.31067	3.35408	3.82083	3.61115	3.59338	3.6788	3.34766	3.19539	3.55815
MVD	4.72972	4.79274	4.69957	4.69199	4.87903	4.74632	4.84453	4.78608	4.95934	4.69482	4.52903	4.48752	4.61354	4.58812	4.82238	4.14103	4.35411	4.92731	4.42767	4.49013	4.62302	4.6082	4.72998	4.98703	4.61017	4.5534	4.77569	4.46359	5.02267	4.67076	4.78855	4.88072	4.8073	4.63173	4.68408	4.43053	4.93826	4.71368	4.99513	4.70303	4.58489	5.82892	5.34716	5.21226	5.4331	5.14539	4.47633	5.67596	4.63371
MYO1D	5.09715	5.02372	5.54806	5.65702	5.6541	5.66685	5.57573	5.45487	5.45251	4.59934	5.20483	5.55903	5.55903	5.03413	5.75229	5.52519	5.45435	5.62169	5.34016	5.17841	5.79065	5.61616	4.98789	5.5281	5.6367	5.35792	5.35413	5.56458	5.93576	5.77804	5.13383	5.8169	5.48912	5.5486	5.82835	5.84848	5.21894	5.49715	5.08776	5.21998	5.19676	4.33112	4.44723	4.24873	4.52136	4.29514	4.2983	4.64354	4.90773
MYOC	3.79274	3.67805	3.898	3.97231	4.02407	4.02785	4.0432	4.70158	6.30552	4.39321	5.29238	4.62061	4.10461	4.49264	3.99104	6.09122	4.24564	4.05268	3.99747	4.30912	4.20651	4.00565	4.01717	4.02002	3.95951	4.03511	4.22979	4.15205	4.05376	4.12521	4.41828	4.03073	3.9439	4.16145	4.23451	3.84071	4.39125	3.89382	4.74908	4.03998	3.77382	5.25563	4.67758	4.67438	4.83981	5.06429	4.94787	4.79467	5.24862
NAGK	9.76558	9.65819	8.90792	8.94527	9.21743	9.10871	9.03565	8.61571	8.56556	10.0883	9.5164	8.88823	9.03133	9.23653	8.81911	9.39574	9.3779	8.93352	9.62394	8.92627	8.83473	9.43397	9.15736	8.91777	9.71023	8.57978	9.35003	8.82034	8.52384	8.81911	8.75931	8.85651	8.86644	8.44272	9.54163	8.97741	9.3059	9.13923	8.75161	10.5681	10.3644	8.74261	8.61955	8.75161	8.79172	8.79066	9.37553	8.6616	9.66705
NANP	6.59741	6.7632	6.89379	6.89676	6.36747	6.39213	6.8549	6.83255	6.44256	6.68941	6.44863	6.57945	6.6997	6.35814	6.36178	6.25478	6.54595	6.48752	6.49189	5.90982	6.41725	6.9081	7.22877	6.97949	6.46871	6.14842	6.68866	6.41203	6.87939	6.81409	6.2126	6.53882	6.43112	6.56411	6.37671	6.36504	6.58831	6.62392	6.13621	6.66552	6.71203	6.28013	5.98302	6.26709	5.86475	6.13942	6.71405	6.08823	6.71263
NANS	6.04265	6.04772	6.16778	5.91671	5.76452	5.66825	6.24071	5.60175	5.85661	5.80428	5.66745	6.21876	5.92765	5.84196	6.14211	5.73108	5.76965	5.65813	5.64707	5.73949	5.95718	5.83167	5.75857	5.84024	5.91221	5.97795	5.68927	5.7252	6.11802	6.0352	6.26681	5.74661	5.82656	5.8021	6.10153	5.58821	6.00495	5.8921	5.94877	6.01577	6.06029	6.4176	6.52605	6.5097	6.53584	6.40193	5.90088	6.27985	5.75496
NAPA	7.87155	7.78992	7.44406	7.33083	7.59372	7.47206	7.40176	7.78992	7.85864	7.41743	7.53014	7.54489	7.89306	7.73341	7.99511	7.62738	7.90234	8.11881	7.80664	7.85808	7.58543	7.71931	7.34814	7.02602	7.84586	7.75057	7.88047	7.91082	7.31532	7.71694	8.06865	7.32007	7.63573	7.82423	7.61429	7.74297	7.45489	7.74407	7.71013	8.01373	7.9649	8.40405	8.08139	8.30634	8.1715	8.16453	7.51973	8.05195	7.51876
NAPB	6.16778	6.37329	5.92086	5.88697	5.96049	5.8751	5.96218	5.82892	5.11085	5.47944	5.63508	5.52653	5.77619	5.63617	5.65679	6.29097	5.69552	5.58764	6.22685	5.48109	6.25506	5.91014	6.35566	5.51113	5.79194	5.40878	6.094	5.93011	5.95156	6.05094	5.14485	6.06515	5.94348	5.80502	5.44219	6.36564	5.91726	5.81444	5.74882	6.17309	6.40495	4.69647	5.1084	4.66091	4.83053	4.63882	5.6803	5.24062	5.5503
NAPG	6.70997	6.93215	7.03645	6.98185	6.98233	6.7914	6.67534	6.70576	6.42949	6.43808	6.27985	6.4925	6.64179	5.92309	7.06878	6.31081	6.46496	6.19958	6.51902	6.35931	6.64531	6.50568	7.29721	7.26425	6.5398	6.41451	6.58863	6.98233	6.5424	6.85338	6.62298	6.52894	6.7969	6.42334	6.29487	7.04114	6.57772	6.55296	6.16488	6.49611	6.60015	5.99779	6.01605	6.28716	6.03459	6.12821	6.62525	5.90371	6.7944
NAT8L	4.55125	4.20491	4.4505	4.41347	4.3561	4.46706	4.3746	4.63317	4.99377	4.36427	4.55175	4.4107	4.6082	4.95603	4.31738	4.52136	4.61976	4.65566	4.69984	4.85412	4.39379	4.38059	4.46096	4.42967	4.26928	4.90531	4.41044	4.4604	4.51707	4.43495	4.83234	4.39068	4.45962	4.7612	4.70884	4.33551	4.63766	4.4627	4.75073	4.39436	4.35891	5.47588	5.41036	5.27405	5.52785	5.33415	4.70662	5.52046	4.45626
NCAN	2.76547	2.97271	2.89596	2.98505	2.88908	2.63124	2.69025	2.66537	3.00157	2.91286	2.68875	2.63169	2.92855	2.67022	2.72702	2.80732	2.80203	2.56059	2.63804	2.73643	2.8406	3.0435	2.89323	2.76547	2.77167	2.76711	2.55493	2.72762	2.76092	2.52584	2.78304	2.82834	2.36505	2.71465	2.79118	2.62687	2.77866	2.55914	2.68704	2.6034	2.83615	3.3776	3.04272	3.04292	3.25034	3.17106	2.91649	3.2467	2.6884
NCF1	6.72302	6.83591	5.14642	4.90101	5.7015	5.412	4.72759	5.76509	6.26382	7.47452	6.40373	5.60152	5.19375	6.54386	5.39946	5.80976	5.5454	5.1427	6.05094	5.65702	5.09854	6.66517	6.37329	4.80902	5.567	4.95034	6.29521	5.10559	5.38228	4.91526	5.39658	5.03908	5.68295	4.42937	5.92221	5.12918	6.68647	5.8444	5.03852	7.37722	7.42554	4.5794	4.4887	4.60331	5.38492	4.81036	7.58274	5.1276	6.98545
NEU1	7.41227	7.48018	7.32952	7.24904	7.85092	7.87751	7.7965	8.05913	7.79052	7.29018	7.66541	7.39881	7.95714	8.20302	7.27444	7.68032	7.9834	7.78095	7.72625	7.7713	7.04558	7.80483	8.10793	8.05329	7.33711	7.52599	7.70137	7.72398	7.22831	8.18687	7.99324	7.69591	7.91138	7.48075	7.90762	7.41646	7.69031	7.70618	7.58952	7.47308	7.5693	8.58983	8.28884	8.51216	8.51032	8.25691	7.17407	8.16178	7.5337
NEU2	3.73367	3.60138	3.57098	3.52689	3.43948	3.36332	3.86857	3.84119	3.8642	3.77011	3.45289	3.5786	3.80957	4.0088	3.51725	3.54612	3.38424	3.46013	3.90111	3.49901	3.31444	3.60308	3.28062	3.72424	3.48671	3.46433	3.51636	3.4787	3.60828	3.80957	3.57245	3.55594	3.21525	3.57411	3.45544	3.55104	3.63479	3.44061	3.60712	3.80729	3.84555	4.20952	4.00324	4.2231	4.27346	3.69148	3.7235	3.76125	3.66521
NEU3	4.41044	4.34182	4.24873	4.38979	4.24539	4.20926	4.36654	4.32957	4.38553	4.59599	4.48526	4.42909	4.46533	4.63036	4.201	4.31272	4.30325	4.24682	4.29624	4.31869	4.12437	4.2983	4.33656	4.23894	4.31354	4.46982	4.25161	4.30134	4.4419	4.20703	4.59874	4.18571	4.23531	4.33578	4.47605	4.1701	4.40679	4.29544	4.31025	4.42937	4.35295	4.90262	4.77569	4.75928	4.59788	4.93328	4.58214	4.56549	4.44136
NEU4	5.06264	4.95603	4.93741	5.02298	5.02656	5.20507	4.94348	5.1276	5.29939	4.94426	5.1537	5.10951	5.17408	5.71502	5.1016	4.75982	5.02502	5.04714	4.81659	5.33465	4.84343	4.70911	5.03691	5.06614	4.94555	5.36464	4.91144	4.99348	5.17129	4.95351	5.567	5.01162	5.14564	5.36413	5.13955	4.95221	5.19429	4.99222	5.81444	4.95603	4.90129	6.24731	6.27341	6.04491	6.31209	6.01317	4.95794	6.23925	4.97987
NGLY1	7.12522	7.28808	6.56872	6.59805	6.80467	6.82378	6.43077	6.63339	6.53846	7.32329	6.83293	6.9438	6.63404	6.78178	6.58316	7.10558	6.63339	6.33913	6.74414	6.29193	6.54922	6.76424	7.72862	6.68069	6.65792	6.41587	6.728	6.49744	6.62599	6.58795	6.32309	6.79259	6.78529	6.65348	6.76821	6.68453	7.02677	6.94693	6.79918	7.51569	7.3664	6.62599	6.54319	6.76785	6.75625	6.44896	7.45249	6.53226	6.87784
NOTCH1	5.7547	5.89809	5.45251	5.73922	5.48166	5.75826	5.8198	5.61265	6.03781	5.63425	5.81247	5.36646	5.76265	5.99865	5.59768	5.60013	5.46665	5.84135	5.57025	5.64949	5.4878	5.66106	5.47997	5.78784	5.32423	5.63779	5.60099	5.63834	5.60124	5.79536	5.73052	5.41946	5.58279	5.77206	5.84547	5.59407	5.66771	5.61563	5.70011	6.26888	6.11775	5.81194	6.33465	6.18904	6.38358	6.21455	5.73483	6.36208	5.71114
NOTCH2	7.71584	7.76568	7.54102	7.73341	7.75567	7.80128	8.1687	8.10436	8.20978	7.71635	8.05329	7.09087	8.15973	8.30485	7.64173	8.26908	8.42992	8.00085	8.13343	8.31583	8.37963	8.33034	8.01373	7.73341	7.85029	7.9635	8.04394	8.03945	7.61644	7.6317	7.80373	7.6489	8.18835	7.66099	8.12649	8.35264	8.02053	8.21054	7.8882	8.00352	7.91522	7.57199	7.83574	7.58062	7.59974	7.53999	8.04743	7.49709	8.13968
NOTCH3	6.48109	6.25413	6.14689	6.33692	6.2031	6.29807	6.42397	6.4634	6.77387	5.91418	6.49218	6.12129	6.48886	6.97715	6.31647	6.63781	6.49779	6.42633	6.40072	6.3266	6.52576	6.58122	5.86614	6.38513	6.17757	6.15407	6.309	6.13423	6.29395	6.4384	6.58186	6.31048	6.1964	6.1466	6.68172	6.56904	6.37513	6.09558	6.57609	6.27403	5.86243	5.73672	5.82458	5.80265	5.62914	5.80837	5.62941	5.79481	6.45872
NOTCH4	5.63697	5.3884	5.02449	5.15233	4.98469	5.19129	5.33551	5.30396	5.53153	5.04766	5.09715	5.10022	5.1602	5.60758	5.3469	5.29608	5.24992	5.38414	5.14218	5.49662	5.11003	5.1754	4.78661	5.18997	5.07231	5.39212	4.95221	5.33835	5.03178	5.34894	5.55985	5.13904	5.0769	5.34738	5.61616	5.23688	5.34333	5.18246	5.43284	5.60813	5.35575	5.33885	5.68002	5.90982	6.28932	5.78395	5.07532	5.96218	5.17324
NPL	7.23425	7.27219	6.29193	6.28165	6.37362	6.36747	6.20578	5.93148	6.54658	6.65757	6.70467	5.45758	6.18482	7.06748	5.86923	6.00585	6.59907	6.20452	6.56167	6.39048	5.29734	7.11388	6.50697	5.98355	6.46116	5.66267	6.19321	6.36959	6.10183	6.04404	5.73565	6.13014	6.38672	5.3299	7.57092	6.10953	6.618	6.44863	5.46976	6.99247	6.90773	4.4604	4.72871	4.39844	4.4735	4.35723	6.35103	4.66479	6.70608
NSF	4.40648	4.41967	4.65132	4.49066	5.05711	4.72944	4.33523	4.79622	4.94377	5.19993	4.67676	4.78576	4.87874	5.10609	4.59302	4.33993	4.89929	4.8495	4.66759	4.81518	4.79079	4.34344	5.06264	4.71053	4.34235	4.65432	4.74879	4.87874	4.83751	4.82896	4.54147	4.36823	4.59632	4.84317	4.41937	4.74188	4.28785	4.56693	4.74135	4.76034	4.70494	5.10356	4.94209	5.04872	5.10951	4.57758	5.12059	4.92649	5.11542
NUCB1	8.10854	8.17439	7.59601	7.84287	7.5776	7.73461	7.50078	8.26521	8.25534	7.55214	8.00877	7.79825	7.73507	8.08474	8.26986	8.07215	7.91272	8.03735	7.63282	7.93418	8.0661	8.12852	8.08602	7.30086	7.99942	7.81365	8.19211	7.81607	7.63965	7.90365	7.80608	7.91462	7.79705	7.81607	7.7634	8.12512	8.04468	7.98394	7.95049	7.98213	7.95406	8.3127	8.33499	7.97464	8.34214	8.08964	7.46293	8.21646	7.97065
NUDT14	4.37729	4.41015	4.51949	4.45597	4.57758	4.49916	4.34564	4.3512	4.81543	4.14898	4.49743	4.40512	4.7801	4.56811	4.56244	4.29379	4.54722	4.67153	4.65566	4.63065	4.28785	4.65031	4.50664	4.73411	4.29227	4.43611	4.52084	4.45823	4.62417	4.51738	4.87705	4.39238	4.42192	4.43724	4.3966	4.33307	4.59331	4.40874	4.28785	4.42741	4.42793	5.40543	5.05088	5.25612	5.27508	5.18298	4.17469	5.45092	4.29681
NUS1	7.048	7.17334	6.99883	7.23563	6.81158	7.02754	6.87107	6.88531	7.20828	7.03683	6.85305	6.88414	7.08808	6.70608	6.95164	6.76251	6.67996	6.84793	6.6424	6.95011	6.6922	7.0158	7.17152	7.07	6.89418	7.21097	6.95237	6.81812	6.91799	6.82752	7.11522	6.9876	6.95742	6.98309	7.02446	6.63817	7.03404	6.94006	7.18686	6.98614	6.90922	7.22613	7.55214	7.38676	7.69806	7.46824	6.87025	7.34861	6.84289
OGA	7.12937	7.25393	7.0773	7.1286	6.85884	6.92218	6.57096	6.84578	6.83891	7.5666	7.20407	6.9594	6.83926	7.08022	6.85271	7.0431	7.04683	7.17444	7.0823	7.06511	7.15541	6.67248	7.42165	6.54452	7.39633	7.12483	6.96018	7.4339	7.02789	6.67466	7.11094	7.1839	7.05411	6.8126	6.96308	6.88708	7.34112	7.04763	7.23001	7.22959	7.24003	6.73802	6.9438	6.676	6.82752	6.64119	7.93418	6.51707	7.12897
OGN	4.60485	4.92512	7.04426	7.05224	6.56134	6.72364	6.83255	11.2401	10.3606	5.81634	9.68133	6.89712	8.00533	10.845	5.57358	10.7916	9.13466	7.72219	8.20229	7.82609	9.42159	7.92916	3.86808	4.73518	6.81377	7.62572	8.82586	6.85413	5.70688	6.09205	7.94424	7.24241	7.6964	9.02113	6.43907	8.94527	9.39757	9.04458	8.52384	4.41187	4.03569	5.27321	5.63752	6.30015	6.22658	6.6134	6.30392	6.03582	8.536
OGT	7.24635	7.22424	7.18887	7.09964	7.2189	7.09964	6.84169	7.20787	7.08435	7.76106	7.52911	7.14604	7.10381	7.26079	7.41696	7.47814	7.14689	7.68252	7.14508	7.05689	7.17369	6.99324	7.15541	6.81738	7.40026	7.155	7.33083	7.06795	6.97289	6.78034	7.57904	7.26736	7.05111	7.31658	7.02826	7.0614	7.74473	7.24904	7.44167	7.52497	7.4563	7.6489	7.58436	7.52599	7.27909	7.35036	7.96559	7.34531	7.35715
OMD	5.29396	5.39212	6.08739	6.23205	5.8369	5.88807	6.08256	9.16657	7.03842	5.07555	7.32818	4.23217	5.71225	8.62455	4.43241	8.15539	7.34582	7.2189	7.03404	6.56255	8.10946	6.35028	3.6114	4.35524	6.87853	6.21203	7.21407	5.20455	5.47435	6.36928	5.48517	6.64596	6.94339	6.57407	6.59267	7.97464	6.84398	7.68366	6.61726	3.40162	3.20696	3.2616	3.4575	3.82234	3.70756	3.38621	4.99455	3.35981	6.8883
OS9	8.61877	8.7503	8.51032	8.76786	8.5597	8.81911	8.5294	8.84377	9.36835	8.49415	8.65249	8.56453	8.97059	8.97188	8.78049	8.75833	8.8302	8.97452	8.53121	9.28095	8.9387	8.88074	8.61398	8.40992	9.00668	9.39574	8.91038	8.89901	8.78049	8.86778	9.44476	8.84018	8.98268	8.93616	8.8107	8.92968	8.83133	8.68952	9.30753	8.73058	8.79406	10.3919	10.4579	10.2372	10.5513	10.3919	8.49592	10.4272	8.68427
OST4	10.4307	10.7089	10.3763	10.3219	10.0815	10.1694	10.5133	9.89759	10.1333	10.4747	10.3399	10.3681	10.0748	10.5301	10.1728	10.1464	10.166	10.2699	10.0217	10.0005	10.1523	10.4385	10.1962	10.5301	9.92032	10.1626	10.3175	10.0005	10.3464	9.92899	10.1015	10.3878	9.77247	9.9146	10.5264	10.0527	10.5426	10.4344	10.1333	10.5723	10.7699	10.3504	10.1894	10.2403	10.354	10.4272	10.3962	10.3763	10.4088
OSTC	10.3878	10.5342	10.3175	10.3432	10.3962	10.3103	10.4787	10.0498	10.2955	10.0005	10.2477	10.0373	10.2372	10.1364	10.4787	9.71023	10.251	10.3219	10.0591	10.14	9.98835	10.1894	9.8489	10.6476	9.97607	10.3919	10.1523	9.94129	10.1589	9.69214	10.6476	9.97329	9.98226	10.0527	10.3919	9.69498	10.3726	10.4704	10.3837	10.0005	10.0883	10.9743	10.9743	11.0892	11.129	11.2249	9.83109	10.9373	10.0748
P2RX3	2.97329	3.08124	2.80483	3.17712	2.86072	3.03505	2.99891	2.63887	3.09277	2.88739	2.96726	2.78019	2.85179	2.69224	3.48534	2.84909	3.06765	3.04049	3.0301	3.32931	3.03192	3.24058	2.91391	2.79347	2.82382	2.9729	3.04686	3.04948	3.13209	2.96534	2.59337	3.16855	2.87602	2.85433	2.80405	2.86407	3.09217	3.02026	2.80732	2.93737	3.04588	2.81492	3.10372	3.28548	3.28569	3.06221	2.59125	2.90855	3.03826
PAPSS2	8.11967	7.93621	8.57978	8.56453	8.38984	8.35853	7.7096	8.91163	8.67232	7.56344	8.46741	8.13121	8.74816	8.83473	8.1114	8.46831	8.53121	8.0507	8.4283	8.72961	8.44018	8.47002	7.92528	8.30945	7.84905	8.83252	7.99453	7.85286	7.80483	7.9103	9.09955	8.38734	8.2359	8.50953	8.61571	8.30003	8.53213	8.5228	8.8302	7.36958	7.28891	8.92133	8.93096	9.21604	9.23996	9.05432	7.38	9.16657	8.54777
PCSK9	4.53782	4.66479	5.51468	5.56507	4.86018	5.07287	5.50422	4.82157	5.16072	4.99696	4.59077	4.83446	4.75814	4.88099	4.47682	4.55125	4.87496	4.4621	4.71287	4.94401	5.04392	4.87329	4.57396	5.07583	4.67945	4.85633	4.6258	4.90582	4.84234	5.51434	5.29759	4.77897	5.12564	5.04009	5.44616	5.2778	4.95194	4.80816	4.67042	4.47407	4.58075	5.18764	5.73892	5.20828	5.52731	5.47642	4.74607	6.13976	4.90286
PDIA3	8.15682	8.31027	8.52194	8.3501	8.29364	8.15325	8.38313	7.6709	7.89709	7.65222	7.9247	8.32867	7.81848	7.5362	8.69486	7.53469	8.07215	7.56344	7.8203	7.84464	8.03525	8.12921	8.63949	7.74237	8.20229	8.09631	8.20747	7.95905	7.97855	8.45414	8.09029	8.08348	8.09301	8.08139	8.17952	8.24403	7.72332	7.83698	8.12852	7.91138	8.01718	8.54564	8.50953	8.52384	8.60538	8.69711	7.35482	8.44641	7.72625
PGM1	9.16997	9.21938	9.3059	9.40336	9.11326	9.16059	9.39574	9.37029	9.85183	8.45649	8.53686	9.64664	10.4424	9.22631	10.1333	8.72961	9.82568	10.0309	9.39956	9.83362	9.17471	9.68395	9.63745	9.54371	8.62152	10.0982	9.05732	9.28095	9.28095	9.31504	10.149	8.82693	9.75815	10.2656	9.32549	9.37553	9.09073	9.47719	10.0851	8.30003	8.24706	10.2103	10.1824	10.2205	10.2103	10.1558	8.16802	10.1268	9.14236
PGM3	6.7093	6.805	7.12814	6.95468	6.94816	6.78713	6.64998	7.04114	7.76967	6.22356	6.51801	6.94157	7.19564	6.58924	6.87219	6.65202	7.0993	6.63197	7.07686	7.06835	6.4895	7.0823	6.93552	7.27173	6.88298	7.38775	6.44075	6.38112	6.61017	6.63434	7.73805	7.07	6.93749	6.83591	7.03488	6.74152	6.61268	6.97169	7.61272	6.5197	6.16541	8.54175	8.48973	8.58983	8.62844	8.58179	6.37957	8.57505	6.71514
PGRMC1	9.19823	9.17787	9.49112	9.48124	9.49112	9.49287	9.48124	9.31839	9.16817	8.90792	9.48124	9.5864	9.29131	9.63745	9.60417	9.258	9.3273	9.73065	9.32549	9.55378	9.46862	8.8063	9.32905	9.49469	9.23653	9.46467	9.1438	9.37029	9.22778	9.04304	9.19008	9.29626	9.45271	9.32381	9.00119	8.72737	9.12422	9.42319	9.12128	9.13318	9.05163	9.16059	9.14236	8.91163	8.77469	9.0472	8.75714	8.75931	9.13466
PI4KB	7.12639	6.79803	6.93592	7.08808	6.62666	6.79881	6.92651	7.35666	7.29952	6.97255	7.09998	6.80135	6.93637	7.35901	6.88606	7.20185	7.03999	7.09469	6.84754	6.99883	6.83293	7.22521	6.64347	6.82792	6.73766	6.9543	6.95981	6.88086	6.9218	7.12443	6.98418	6.88972	7.14508	7.03683	7.00314	7.26295	7.22613	6.99841	6.9776	6.9996	6.91074	6.88868	7.14466	6.64596	6.94536	6.70046	7.05073	7.0332	7.02525
PKM	8.76149	8.82265	8.93352	8.97059	8.9635	9.01573	9.10276	7.89501	8.03382	7.8616	8.15819	8.1058	8.13751	7.7481	9.20297	7.75102	8.00817	7.87878	7.76163	7.74647	8.54354	8.72052	10.4236	9.17932	8.98908	8.17074	8.61485	9.13318	9.23126	9.58836	7.80902	8.99603	8.26015	7.93091	8.95041	8.97881	8.19146	8.31027	8.33111	8.12098	8.37467	7.52394	7.24423	7.53316	7.5362	7.66099	7.49709	7.68252	8.21267
PLCB4	4.14869	4.38808	6.90848	6.47382	7.01194	6.32276	5.58068	5.87199	5.26722	5.07666	5.90428	5.4307	4.72616	4.85304	5.77914	6.28074	5.36765	5.00692	5.12196	5.09388	7.05265	5.13102	4.8776	5.0804	6.26947	5.21492	5.45385	5.31382	5.88635	5.67649	4.68891	5.94823	5.63641	5.53988	4.85552	5.6821	5.26482	5.33627	5.00317	3.89538	4.21181	3.99951	4.2449	4.06291	4.03973	3.86367	4.96994	4.14709	5.58094
PLOD1	8.36837	8.46914	7.55537	7.3673	7.37517	7.41603	7.75159	7.61797	7.41367	6.95981	7.3553	8.01006	7.51019	7.68145	8.1469	7.0464	7.46627	7.39252	7.44354	7.16108	7.32236	8.05195	8.73374	7.96748	7.07936	7.02483	7.80842	7.3553	7.56344	8.48256	7.3472	7.42841	7.18215	7.14385	8.21339	7.85092	7.2621	7.76739	7.38581	8.33726	8.01854	7.26821	7.3757	6.8883	7.24993	6.90202	6.42884	7.62031	7.89134
PLOD2	9.69214	9.70774	9.06153	9.05296	9.05432	9.07284	9.05576	8.86908	9.04304	6.9251	8.29438	9.25609	8.89314	8.47251	9.77247	7.87465	8.4878	8.19656	8.91518	8.49837	8.14323	9.60203	11.2101	10.3726	8.38568	8.06469	8.78414	9.15736	8.57505	9.54551	8.30634	9.01072	8.3404	8.28884	9.48689	8.62547	8.76255	9.36433	8.83804	8.12447	8.14044	7.39633	7.72109	7.41081	7.45097	7.60028	7.03027	7.64514	8.62645
PLOD3	8.63759	8.53686	8.81565	8.82804	8.50047	8.64473	8.73822	8.22395	8.29438	8.44641	8.41603	8.65151	8.40315	8.77469	8.62844	8.18687	8.65151	9.22123	8.37894	8.21646	8.24483	8.5778	8.87608	8.23122	8.91408	8.422	8.73374	8.60063	8.62052	8.88574	8.39641	8.60063	8.5192	8.36482	8.84256	8.57233	8.44018	8.35853	8.40152	8.3509	8.32055	8.36567	8.25931	8.16654	8.38984	8.52749	7.85163	8.36755	8.5544
PMM1	5.87034	5.80837	5.7437	5.53961	5.84277	5.90183	5.85244	6.19148	5.95518	5.59279	5.78107	6.27034	6.06001	6.40407	6.07228	6.47572	5.88728	6.00069	6.01852	6.24886	5.76878	5.75229	6.02759	5.95605	5.83246	5.78075	5.68514	5.41922	5.79453	6.4142	5.95947	5.94089	5.91696	6.06626	5.72116	5.96104	5.74029	5.84573	5.95749	5.49048	5.55237	6.32212	6.0352	6.35662	6.23078	6.33343	5.81953	6.31301	5.71169
PMM2	7.16108	7.07395	7.40568	7.44307	7.07198	7.09169	7.90832	7.03645	7.4634	6.73009	7.12355	7.50179	7.17196	6.66759	7.6501	6.80822	6.83045	6.87897	6.95088	7.07603	6.74759	7.16371	7.14854	7.14983	7.2326	7.25434	7.017	6.75625	7.04558	7.25213	7.68918	7.23951	6.96348	7.19703	7.557	6.90729	6.96549	7.24196	7.13147	6.31081	6.45283	7.95533	7.68252	8.2737	7.82967	7.68639	6.93679	8.08139	6.8406
POFUT1	4.72507	4.86044	4.7468	4.89244	4.77306	4.76422	4.9975	5.04364	5.1122	4.82631	4.86297	4.71475	4.79128	5.00344	5.1195	4.80953	4.75731	4.71205	4.67999	4.94318	4.75673	4.89986	5.058	4.85463	4.70579	4.82576	4.89876	4.83781	4.80926	5.04253	4.76509	4.83581	4.65647	4.91229	4.93328	4.98333	4.81093	4.86755	4.84792	4.92624	5.09388	4.95934	5.39026	5.18656	5.16046	5.28383	4.89929	5.27405	4.8776
POFUT2	4.7891	4.65977	4.60935	4.64777	4.62444	4.6789	4.69389	4.9061	5.03149	4.48077	4.68463	4.73518	4.81659	4.86755	4.59162	4.59419	4.61187	4.73631	4.68725	4.86954	4.63591	4.66202	4.7612	4.80294	4.50582	4.90831	4.79467	4.72147	4.79325	4.80094	4.99539	4.64378	4.69957	4.7798	4.62474	4.61493	4.87329	4.67676	4.84178	4.58569	4.44162	5.45197	5.28961	5.43598	5.66934	5.45945	4.65592	5.38946	4.6264
POGLUT1	7.39157	7.37819	6.8472	6.87219	7.03069	6.98722	6.72619	6.9013	6.67633	7.66653	7.19878	7.20878	6.83045	7.05525	6.85999	7.26736	7.33037	6.40983	7.25989	6.68549	6.61992	7.0388	6.53226	7.14508	6.58831	6.27182	6.96549	6.78858	6.7426	6.94776	7.41227	6.8975	7.25989	6.61959	7.27528	7.14773	7.20144	7.0388	7.03069	7.33216	7.28071	6.57701	6.64471	7.20627	6.87493	6.57701	7.52732	6.8549	7.1961
POGLUT2	6.80895	7.10512	7.33474	7.45249	6.96056	7.11134	7.20362	7.81671	6.30804	5.91088	6.69813	6.56344	6.60819	7.33216	7.07435	6.71981	6.94976	6.11377	7.30688	6.10326	6.89861	7.46774	6.60544	7.16371	6.88011	6.32628	7.22244	6.68209	6.73379	7.63797	6.05626	7.39733	6.67501	6.30989	7.18132	7.6312	7.21676	7.25516	5.9938	6.54626	6.82023	4.20815	4.41262	4.0093	4.69844	4.57533	5.25334	4.32172	6.99841
POGLUT3	7.81553	7.82609	7.88767	8.28635	7.72279	7.95905	8.03658	8.56261	8.13691	7.22749	7.92225	7.06176	7.8007	7.74178	7.73402	8.08276	7.78729	7.71931	7.89779	7.95596	8.6102	7.97977	7.49205	8.11416	7.70029	7.72921	8.09361	8.06794	8.03735	8.21267	7.88767	8.02241	8.02113	8.20009	8.21871	8.77252	7.7735	8.47079	8.08068	7.8853	8.03314	7.56874	7.65166	7.62361	7.38238	7.50375	6.94575	7.51522	7.90294
POMGNT1	5.20021	5.20643	5.09255	4.91856	4.78095	4.76509	5.14218	5.02717	4.98361	4.85633	5.00994	4.97683	5.06454	4.97928	5.34227	4.67319	4.79703	5.05135	4.77843	4.86755	4.86378	4.91054	5.35792	4.89717	4.59657	4.74471	4.97631	4.90206	4.92896	4.86895	4.92649	4.82973	4.70719	4.72842	4.79597	4.72998	4.89663	4.82097	4.80457	5.12326	5.04283	4.63122	5.09748	5.13878	4.68167	4.82299	4.86493	4.96744	4.84736
POMGNT2	5.82005	5.89072	6.59546	6.43717	6.43531	6.26408	6.73693	7.01271	6.52044	5.95861	6.56967	6.13162	6.57166	6.76289	6.43655	7.03195	6.55622	5.96757	6.56508	6.75226	6.61726	6.86598	6.68105	6.59055	6.27463	6.45773	6.55652	5.94207	6.05973	6.70284	6.94461	6.41889	6.31582	6.68139	6.36208	6.89121	6.34283	6.43808	6.41486	5.86243	6.0018	7.34342	6.98845	7.5218	7.05036	7.11723	5.9566	6.75625	6.37113
POMK	3.49027	3.18554	3.64288	3.40528	3.61764	3.53329	3.40957	3.48032	3.69645	3.68939	3.28062	3.70654	3.3297	3.51682	3.49168	3.34291	3.55057	3.85767	3.60138	3.71029	3.54104	3.24206	3.65158	3.39821	3.70881	3.48126	3.57335	3.79773	3.34726	3.37632	3.82369	3.17651	3.53712	3.43161	3.60233	3.3273	3.43665	3.28957	3.4713	3.40714	3.14556	3.93141	3.85568	3.68843	4.12059	3.97421	3.5237	3.53579	3.43118
POMT1	5.07986	5.27644	5.41416	5.34869	5.34894	5.36958	5.7437	5.58383	5.36765	5.11923	5.56067	5.29709	5.4235	5.41659	5.28626	5.8444	5.42764	5.46078	5.47302	5.45972	5.71998	5.59712	5.71051	4.97715	5.29315	5.32423	5.40164	5.50911	4.88123	5.56268	5.41036	5.33439	5.5659	5.38971	5.16297	5.60281	5.4658	5.44924	5.28027	5.32293	5.282	5.64648	5.96248	5.86698	5.40692	5.86976	5.41819	5.8627	5.26341
POMT2	5.42477	5.42529	5.614	5.72201	5.56404	5.89586	5.96902	5.69113	5.86018	5.5478	5.39815	5.55581	5.90088	5.83115	5.51092	5.58521	5.80786	5.73483	5.64817	6.03175	5.81444	5.82919	5.64286	5.62598	5.521	5.73379	5.67294	5.69497	5.84713	5.80811	5.94906	5.70886	5.62006	5.81865	5.83631	6.17454	5.64949	5.65162	5.98193	5.44434	5.43128	6.17725	6.21118	6.26586	6.43907	6.09792	5.45888	6.19116	5.63697
PPP6C	7.61327	7.75216	7.57247	7.6908	7.36774	7.53014	7.63061	7.84287	8.18339	7.94604	7.69483	7.48528	7.74696	7.62361	7.45051	7.95181	7.72219	7.70195	7.74055	8.10655	7.80967	7.82785	7.69591	7.46963	7.73402	7.90957	7.67706	7.73092	7.68806	7.54489	8.17591	7.2954	7.70903	7.88107	7.72625	7.67145	7.89709	7.79705	8.02786	8.006	8.05195	8.53775	8.61485	8.41863	8.60063	8.7503	8.22759	8.4326	7.76163
PPP6R1	7.28309	7.07317	7.20878	7.19703	7.24003	7.13641	7.16282	7.03448	7.10467	7.35901	7.27675	6.9251	7.16154	7.4916	7.40073	7.2415	7.06748	7.07603	6.92978	7.18562	6.99841	7.20267	7.27675	6.85087	7.13379	7.12404	7.46728	7.1097	7.02602	7.11892	7.40026	7.09428	7.00913	7.00314	7.24993	7.34431	7.2504	7.18171	7.2415	7.64514	7.32283	7.43338	7.81026	7.38476	7.69748	7.48615	7.59479	7.82308	7.15368
PPP6R3	7.01617	7.42647	7.09765	7.19262	6.95352	6.81812	7.38238	7.25393	7.27173	7.26736	7.30784	7.15245	7.155	7.23643	7.2906	7.33216	7.07357	7.18887	7.16669	7.19391	7.46869	7.3237	6.60113	7.29018	7.45821	7.25817	7.42699	7.55214	7.14256	7.29587	7.4076	7.47961	7.32679	7.34582	7.39881	7.46824	7.41509	7.1765	7.38286	7.22195	7.44952	7.34112	7.26821	7.17822	7.27726	7.23515	7.59601	7.2526	7.04114
PRDX4	10.5468	10.5003	10.9482	10.8081	10.2372	10.1203	10.1962	9.88932	11.9015	10.1558	10.0883	10.3175	10.67	10.1589	10.4163	10.262	10.9681	9.97607	10.0623	11.2401	9.65594	10.4344	9.85754	10.6244	10.0722	11.2862	9.99466	9.70774	9.69999	9.80477	12.3905	10.1232	10.4344	10.9987	10.2337	9.68929	10.3644	10.13	11.4418	10.0247	10.0309	13.0454	12.9998	13.0682	13.0243	12.8804	10.13	12.9407	10.1015
PREB	7.23643	7.29721	7.16539	7.17778	7.186	7.00873	7.55484	6.89341	7.28309	7.20662	7.16715	7.34112	7.11522	7.25352	7.1303	7.36168	7.34431	7.2845	7.25739	7.17444	7.03532	7.51473	7.35482	7.32861	7.16064	7.19179	7.38	7.07686	7.07276	7.34582	7.73341	7.16323	7.19348	7.2468	7.65985	7.29952	7.41743	7.32952	7.34671	6.92024	6.99687	8.03881	7.7751	8.01006	8.07932	8.07361	7.01115	7.99198	7.64676
PRELP	7.09055	6.99648	7.50676	7.6621	7.3664	7.48957	8.46914	8.90913	8.36258	6.94269	7.64396	6.39017	7.52021	8.54564	6.55055	8.62844	8.71951	8.50047	7.68032	7.82083	9.29131	7.73928	5.43979	6.13132	8.74035	7.88469	8.07426	7.68806	7.95776	8.23524	7.38975	8.32308	7.98667	7.50924	8.54452	9.3906	7.42451	7.24811	7.80312	7.79228	7.64122	7.13821	7.00468	6.64998	6.77317	6.77286	7.10132	6.5533	7.77025
PRKCSH	8.25607	8.18177	8.26758	8.07426	8.22966	8.18482	8.58179	8.11004	8.50953	7.86101	8.28884	8.34766	8.37894	8.4878	8.21267	8.16932	8.24867	8.64357	8.08751	8.515	8.39304	8.31104	8.21951	8.30171	8.39066	8.57318	8.30563	8.2737	8.00471	8.14252	8.6102	8.61775	8.34214	8.63036	8.44367	8.21137	8.38984	8.14123	8.53775	8.12921	8.25006	9.25609	9.20649	9.1103	9.17154	9.12721	8.26434	9.28977	8.18258
PSEN1	5.22891	5.27349	5.39556	5.45758	5.469	5.44924	5.61698	5.29734	5.16527	5.25563	5.28383	5.40108	5.24913	5.18169	5.22858	5.13517	5.30295	5.36646	5.27274	5.08543	5.30645	5.2775	5.31896	5.44668	5.43919	5.363	5.26906	5.59221	5.51881	5.22723	4.88765	5.28278	5.24218	5.09255	5.36364	5.22448	5.38076	5.32293	4.8658	5.21599	5.18145	4.78993	4.87248	4.70719	4.84371	4.8839	5.25588	4.89062	5.45529
PSMC1	9.9146	9.82861	9.54371	9.61091	9.75815	9.72059	9.9146	9.65363	9.73065	9.93246	9.84341	9.79962	9.85499	9.76761	9.82861	9.79235	9.90015	9.60203	9.86262	9.75815	9.6421	9.95878	10.1203	10.1141	9.90015	9.77998	9.90015	9.79463	9.84079	9.85995	9.76295	9.83607	9.65819	9.69498	9.60877	9.82861	9.82568	9.72547	9.77998	9.95028	9.93519	9.77998	9.70281	9.93519	9.81205	9.47517	9.76054	9.88394	9.74313
PTGDS	8.67145	8.5228	8.98406	8.80956	9.2709	9.11491	7.01663	11.8849	9.27921	10.0185	10.4344	8.78653	9.06296	12.2808	8.04539	12.1784	9.87365	9.07589	9.13466	9.52485	11.1733	9.00668	6.6123	7.38729	9.75815	9.84341	10.9559	8.40992	7.99063	7.82423	9.32213	9.47719	9.62205	9.86522	9.08791	10.5948	11.2696	9.83607	10.1962	9.46677	9.27744	8.98658	8.68098	8.48594	8.32208	7.97464	10.9866	8.48688	9.59994
RAB14	7.15073	7.20316	7.29159	7.2159	7.14895	6.92258	7.00669	7.09087	7.01115	7.43726	7.20922	7.25695	7.31343	7.26695	7.13147	6.94157	7.27357	7.03761	7.38337	7.2638	7.18841	7.14342	7.30266	6.97011	7.22332	7.23515	7.10685	7.38476	7.39534	7.04071	7.0993	6.99997	6.81849	6.98345	7.05932	7.05812	7.18686	6.97331	6.92794	7.41743	7.34342	6.86634	6.90885	7.0233	6.73448	7.01151	7.49924	6.89158	7.12019
RAB1A	7.36822	7.23043	7.4294	7.39205	7.36496	7.30359	7.02009	7.2468	7.48227	7.21933	7.25477	7.41876	7.38874	7.21368	7.49259	6.96628	7.12404	7.2415	7.15906	7.32548	7.21144	7.09813	7.1421	7.27528	7.40982	7.46824	7.02525	7.11639	7.26736	7.08102	7.58849	7.20828	7.14854	7.34631	7.32861	6.96789	7.29298	7.2727	7.35941	7.02907	6.92331	8.07215	7.90893	8.04342	8.01063	7.93418	7.14983	7.89306	7.26957
RAB1B	8.08602	8.22759	7.74874	7.76215	7.88229	7.65829	8.21487	7.69591	7.83444	7.76454	7.81142	7.89501	7.83213	8.15325	8.11351	7.49308	7.84716	7.94141	7.76739	8.01063	8.02308	7.99389	8.14123	8.03382	8.09505	7.94487	8.12238	7.91138	8.00817	8.14401	8.07215	8.05981	7.69591	7.98667	7.88107	7.94547	7.66152	7.66541	7.84646	7.88706	8.00416	8.56556	8.55651	8.57685	8.1862	8.31184	7.69748	8.46371	8.042
RAD23B	8.58069	8.56356	8.03599	8.1469	7.98603	8.00282	8.06794	8.50697	8.3568	8.17669	8.16511	8.30003	8.51831	8.22544	8.09103	8.09959	8.14401	8.07215	8.34616	8.38818	8.15893	8.06865	8.54076	8.19211	8.14323	8.31898	8.1114	8.40488	8.28555	7.92292	8.36755	7.87033	7.98989	8.21951	8.10097	8.11076	8.18025	8.44179	8.38984	8.05463	8.042	8.19801	7.95406	8.09029	7.87465	8.40826	8.5544	8.23276	8.34456
RAMP1	6.1228	6.26205	6.77535	6.58186	6.86371	7.05073	7.83574	7.21185	8.11076	5.66411	6.73307	7.53164	7.66331	6.51867	6.66759	6.0832	7.15031	7.47503	7.17242	7.63398	6.78788	7.25213	6.29807	6.79881	7.4916	7.68252	6.68516	7.13951	6.7445	6.83891	8.09833	6.29308	7.00873	7.66438	7.07813	6.96826	6.32752	6.54452	7.93549	5.04093	5.10951	8.95953	8.78049	9.80477	9.44857	8.91163	6.01012	9.17932	6.12447
RANGRF	6.16105	5.95488	6.36272	6.34563	5.98527	6.00845	6.00291	6.30961	5.93148	6.56872	6.47847	6.33249	6.15775	6.49351	6.37731	6.57166	6.5107	6.13364	6.36504	6.18482	6.2178	6.29615	5.68133	6.07027	5.95432	6.07256	6.23838	6.08886	5.97273	6.45872	6.09884	6.1368	6.14904	6.0323	6.35137	6.16105	6.41014	6.22714	6.00959	6.53742	6.54626	6.21638	6.05601	6.26237	5.93439	6.17575	6.52209	5.88484	6.35692
RENBP	4.54171	4.97847	4.601	4.72035	4.51513	4.43266	4.43555	4.33365	4.64889	5.0372	4.68167	4.32844	4.78329	5.24642	4.32023	4.14654	4.59599	5.03095	4.38692	4.47152	4.32425	4.90286	4.64861	4.56524	4.69338	4.32398	4.87705	4.4847	4.385	4.51081	4.77331	4.39208	4.73657	4.4458	4.90504	4.65132	4.75701	4.66005	4.26257	5.44877	5.76452	5.32242	4.57058	5.01398	4.87731	5.32025	5.35871	4.62503	4.65081
RFT1	4.51856	4.53352	4.58869	4.3108	4.56893	4.33603	4.48925	4.3648	4.56211	4.56211	4.34019	4.40202	4.46842	4.49804	4.59934	4.25455	4.46126	4.47578	4.39738	4.4659	4.22563	4.36091	4.73302	4.41212	4.37179	4.53694	4.36879	4.32259	4.44335	4.49151	4.75954	4.38444	4.46898	4.59684	4.4442	4.28233	4.4835	4.43053	4.36564	4.47887	4.40317	5.3667	5.14039	5.25446	4.58654	4.87652	4.43053	5.24889	4.4132
RNF103	7.78208	7.72862	8.10164	8.1715	8.12168	8.15539	7.86778	8.14323	8.24643	8.02979	8.18258	8.30171	8.21054	8.1687	8.07495	8.00416	8.2737	8.51831	8.1539	8.37719	8.42118	8.00282	7.88229	8.1505	8.34695	8.5294	8.07932	8.46914	8.32055	8.00533	8.24111	8.25388	8.33578	8.38984	7.9211	8.18177	7.9649	8.07141	8.22759	7.8925	7.84586	8.47965	8.49062	8.27213	8.32308	8.47871	8.08964	8.51311	8.08964
RNF139	8.26359	8.53873	8.42118	8.42292	8.09179	8.20898	8.57233	9.01978	8.53873	8.66943	8.65436	8.72052	8.47079	8.80514	8.43599	9.05163	8.44732	8.18687	8.54076	8.59975	8.33726	8.71547	8.57411	9.12278	8.52098	8.22685	8.6616	8.37634	8.23742	8.61398	8.52839	8.37634	8.37803	8.63759	8.34929	8.39152	8.5544	8.48079	9.23653	8.14767	8.39224	7.89569	8.01006	8.14974	8.34846	8.42118	8.68098	8.61955	8.76357
RNF185	6.85805	6.70608	6.70323	6.59267	6.60078	6.57511	6.7632	6.88414	6.78966	6.68716	6.91469	6.88298	6.75625	6.8975	6.55973	6.80782	6.80675	6.87975	6.72972	6.75867	6.7675	6.75192	6.63919	6.78071	6.48688	6.77423	6.57342	6.40861	6.56344	6.69357	6.78894	6.49189	6.60279	6.62024	6.85957	6.64967	6.62696	6.74591	6.35814	6.676	6.41259	7.1707	6.85021	6.61567	7.16539	6.81545	6.79578	6.78248	6.64309
RNF5	5.86726	5.84962	5.94958	6.00407	5.80729	5.95184	5.9341	5.68654	6.04134	5.86949	5.89534	5.93809	5.91335	6.22929	5.84277	5.88942	5.90788	6.10267	5.91478	6.15027	5.76796	5.72831	5.85272	6.05859	5.84386	6.16019	5.84306	5.99004	6.35413	6.18206	6.27278	5.95835	6.14725	6.23779	6.04213	6.05242	5.90504	5.96248	6.34157	5.82223	5.93809	6.7273	6.64179	6.8681	6.67008	6.66444	5.8921	6.52576	5.69925
RP9	5.80674	5.68459	5.59357	5.80181	5.777	5.69406	5.72229	5.62725	5.56432	5.91275	5.80532	5.64675	5.86976	5.614	5.73672	5.76424	5.75307	5.54272	6.10675	5.79194	5.68082	5.66381	5.89534	5.92577	5.4824	5.56507	5.67596	5.70604	5.69822	6.01995	5.69954	5.51018	5.58383	5.58469	5.82339	5.71474	5.66267	5.83524	5.8314	6.12679	5.87618	5.64847	5.8314	5.99179	6.08056	6.08739	6.57475	6.00207	5.58683
RPL10	7.76967	7.57092	7.4901	7.52021	7.5052	7.54152	7.59542	7.77297	7.92165	7.92038	7.84521	7.81848	7.88882	8.10722	7.51622	7.64621	7.85561	7.97331	7.66653	7.96422	7.71189	7.53113	7.62738	7.62675	7.68806	8.08602	7.57659	7.71529	7.72686	7.54053	7.94782	7.77859	7.8213	7.88469	7.87585	7.69806	7.80724	7.81314	8.04273	7.66438	7.6501	8.41434	8.45333	8.26521	8.35935	8.20978	7.94782	8.34214	7.80842
RPL18	8.99316	8.72401	8.83591	9.06843	8.90028	9.04151	8.83473	9.04591	9.36623	9.34294	9.20983	9.20148	9.19972	9.45485	9.08932	9.43232	9.25466	9.25101	9.01846	9.38348	9.16657	8.83591	8.95829	8.70234	9.06566	9.40738	8.92749	8.94141	8.92374	9.07284	9.49889	9.18553	9.00007	9.18553	8.99603	9.01846	9.23126	9.10276	9.54747	9.27566	9.08932	10.1333	10.1203	10.1141	10.1203	10.1433	9.52692	10.1894	9.23996
RPL27	13.575	13.4484	13.1745	13.0454	13.1745	12.9604	13.1318	13.4714	12.9216	13.5462	13.7242	13.4484	12.9998	13.4936	13.3813	13.6051	12.8804	13.0899	13.1318	13.0682	13.3813	13.2921	13.694	13.1745	13.2687	12.8804	13.4936	13.2687	13.3813	13.6645	13.1962	13.2426	12.9011	12.9604	13.6335	13.3366	13.3813	13.3595	13.0682	13.694	13.6645	13.1099	13.0899	13.1543	13.1962	13.1543	13.7548	13.0899	13.6645
RPL4	12.8185	13.1543	13.1962	13.1543	13.0454	13.0454	12.9998	13.1962	13.1543	13.3366	13.3366	12.9812	12.7953	13.2921	13.1318	13.4936	12.8593	12.8185	12.9216	13.1543	13.3366	13.3595	13.4035	13.4249	13.0899	12.9604	13.1543	12.838	13.0899	13.3366	13.1745	13.0454	12.9216	13.1099	13.3143	13.0682	13.6335	13.2687	13.3595	13.2426	13.4249	13.1962	13.2687	13.2426	13.3143	13.1962	13.3813	13.2921	13.2687
RPL6	13.3813	13.1962	12.9216	13.0899	12.9011	12.8804	12.9011	13.3366	13.2921	13.5209	13.575	13.1745	13.1099	13.3366	12.9407	13.4484	13.0899	12.9407	12.9998	13.1745	13.1962	12.9011	13.0899	12.9998	12.6683	13.0899	13.2687	12.8593	12.9407	12.8185	13.4249	13.1745	12.8593	13.1543	13.3366	13.2184	13.4249	13.2184	13.0454	13.4714	13.3143	13.3366	13.2921	13.5462	13.5462	13.3595	13.4035	13.3595	13.4714
RPN1	5.81247	5.96787	6.07087	5.80729	6.14033	5.87754	6.15924	5.71251	5.94906	5.71359	5.84135	5.79481	5.78304	5.8754	6.27956	5.50137	5.79873	6.18453	5.65354	5.9524	5.87729	5.9751	6.20167	5.99723	5.85079	5.93894	5.93809	5.83052	5.93494	6.16861	6.07457	6.12034	5.94678	5.98355	5.89648	5.98744	5.98527	5.93576	5.85164	5.64424	5.98469	6.75906	6.07401	6.33217	6.32403	6.20969	5.78618	6.30521	5.80149
RPN2	10.9482	11.1014	11.1365	11.0683	10.8349	10.9482	11.0491	10.2546	10.7861	10.6335	10.3254	10.8033	10.6381	10.7861	11.3939	10.5948	10.855	10.6381	10.6936	10.6194	10.5723	11.1434	11.2949	10.8876	10.9621	10.8716	11.4509	10.6647	10.5856	11.0949	10.8303	11.0098	11.0892	10.761	11.166	10.6559	11.1881	10.7755	10.845	10.7916	10.9039	11.2401	11.2696	10.7861	10.8773	10.845	10.5342	10.9866	10.4873
RPS21	10.4464	10.2172	9.85754	9.88932	10.149	10.2103	10.1728	9.73844	10.2546	10.8935	10.3291	10.4307	10.1232	10.5003	9.90015	10.4307	10.262	10.1824	10.2656	10.3254	10.0851	9.79711	10.3254	10.2546	10.0342	10.179	10.0102	9.88709	10.262	10.2268	10.166	10.0373	10.1962	10.4704	10.0691	10.1855	10.292	10.1015	10.3504	10.7813	10.6647	10.8825	10.7755	10.914	10.8498	10.7558	10.5264	10.7401	10.5723
RPS23	9.9116	10.007	8.98533	9.42159	10.3067	10.483	10.2034	10.4236	10.8773	10.8143	10.3219	10.5301	10.4543	10.4704	9.98226	10.4704	10.0185	10.354	10.1464	10.4198	9.81728	10.0722	9.8814	9.79962	9.68133	10.6	10.4236	9.82019	10.5681	9.93806	10.1855	10.3575	10.0408	10.5301	10.4344	10.4272	10.3254	10.4464	10.7861	10.5045	10.4704	10.3681	10.5723	11.1218	11.2778	11.2696	10.7235	11.1434	10.7235
RPS27A	7.59601	7.68694	7.29254	7.37819	7.64514	7.53886	7.09087	7.86838	7.70465	7.86905	7.73221	7.75269	7.66493	7.64396	7.65829	7.54793	7.68694	7.39534	7.50179	7.40367	7.51676	7.33844	7.35621	7.63734	7.29437	7.44307	7.39583	7.33474	7.38476	7.11978	7.76623	7.5042	7.53999	7.64233	7.46195	7.34112	7.42554	7.31836	7.6501	7.64066	7.48018	8.37312	7.95714	8.2659	8.24643	8.14469	8.01252	7.98527	7.59226
RPS28	7.84905	7.66814	7.67314	7.80664	7.96681	8.01581	7.68088	8.27213	8.22901	8.40152	8.17877	7.87815	8.08751	8.37554	7.5444	8.13691	8.03382	8.08751	7.84716	8.23202	8.09631	7.93091	7.61272	7.78801	7.88107	8.17221	7.96997	7.62139	8.19864	7.69421	8.17517	7.8964	7.79112	8.20302	8.18687	8.05981	8.13751	8.03599	8.44455	8.09893	7.99942	8.91038	8.91408	8.73058	8.84256	8.84377	8.35598	8.9054	8.03881
RPS29	8.57685	8.76357	8.85539	8.79406	9.15886	9.23822	9.08932	9.02988	9.49679	9.43915	9.16499	9.06014	9.39956	9.29131	8.82034	9.59322	9.43232	8.93469	9.33589	9.38515	9.25942	9.21123	8.81698	9.18857	9.10109	9.32549	9.39757	9.01318	9.17154	8.96478	9.66929	9.20484	9.00945	9.30753	9.02696	9.32213	9.22301	9.09198	9.51406	9.26279	9.23822	10.14	10.0185	10.4088	10.3219	10.1824	9.54551	10.1927	9.13625
RXYLT1	6.93215	7.08187	7.05449	7.01825	7.07078	7.06096	6.74221	6.97047	6.7907	6.77069	6.80277	6.49125	7.05525	6.53023	7.23905	7.33302	6.85055	6.84686	7.23382	6.89236	7.10798	7.18132	7.29903	7.01115	6.85021	6.86709	6.98885	6.9578	6.9412	6.97676	7.08064	7.15863	6.81441	6.97676	6.75532	7.02291	6.82167	7.18723	6.69633	6.80244	6.83217	7.44354	7.05775	7.41876	7.10467	7.49763	6.54555	6.90011	6.68387
RYR1	3.20988	3.59924	4.46786	4.17441	3.98433	3.89489	3.11098	2.94232	3.09406	3.38747	4.08107	3.44228	3.08105	3.16719	3.25933	3.88705	3.09748	3.11076	2.71977	2.97733	3.38357	3.71103	3.7073	4.29074	3.59475	3.03565	3.91884	2.95435	3.45929	4.91307	3.54128	3.46766	3.4552	3.26488	3.51416	3.78682	3.46898	3.41752	3.19598	3.5404	3.67446	3.14824	3.17188	2.91144	3.31628	3.14968	3.46659	3.29529	3.48942
RYR2	4.34681	4.36879	3.92075	4.03097	4.05752	3.81908	4.08191	4.52766	5.19047	4.00083	3.88085	3.994	4.17257	3.96964	3.84735	4.4497	4.09141	3.81336	4.0747	4.0313	4.22095	4.47661	3.83468	3.8376	3.97843	4.06151	3.98324	3.99456	3.88653	3.95684	4.37066	4.08133	3.93704	4.0871	4.04607	4.41802	4.07641	4.03291	4.18712	3.98351	4.29074	4.83118	4.78742	5.31676	5.11891	5.21628	4.01039	5.5029	3.6559
RYR3	2.79525	2.95033	2.81178	2.76685	2.91627	2.71401	2.74423	3.12713	3.30018	3.06568	3.15756	3.0305	2.54747	3.31903	2.72301	3.68962	2.76995	2.77466	2.61687	2.59227	2.84471	2.89018	2.87992	2.76092	2.73239	2.66309	2.82405	2.99558	2.65883	2.81737	2.5714	2.81102	2.69224	2.68133	2.71368	2.80934	3.448	2.77838	2.58451	3.05132	2.90404	2.75619	2.60894	2.83212	2.59973	2.70435	2.69873	2.61154	3.40226
S100A12	7.35901	7.22831	3.08455	3.05068	4.42112	4.51299	3.52019	7.23733	7.39834	7.6511	4.76955	5.82946	4.42297	7.68694	3.77132	4.15205	3.91781	2.91884	3.59924	4.21702	3.47154	6.32495	4.32172	3.1952	3.80729	3.08515	4.49349	3.14881	3.36799	3.33222	3.31231	3.41909	3.65232	3.04272	3.6882	3.2548	4.95404	3.50303	4.02602	7.6501	7.56454	3.81285	3.19558	4.68315	4.44532	3.21752	5.63026	3.44823	7.66596
S100B	3.76834	4.04185	4.17906	3.98915	3.73424	3.808	3.90188	5.08321	4.15344	4.38524	4.22284	3.92465	3.64341	4.39974	3.23669	4.93358	3.91176	3.46266	3.92704	3.4762	4.42882	4.67705	4.63993	3.43814	3.88705	3.35981	3.90026	3.76759	3.8831	3.34726	3.40076	3.72844	4.22563	3.58052	3.49679	4.39036	4.83721	4.49688	4.0093	3.69765	3.88607	3.21276	3.1501	3.3209	3.00717	2.99618	4.79353	3.01164	4.80953
SAR1B	6.65656	6.59836	6.84289	6.87897	6.74907	6.62696	7.26125	6.50323	6.91644	6.71298	6.61764	7.13075	6.71263	6.34997	6.75044	6.28165	6.53226	6.72053	6.47226	6.74844	6.37485	6.62094	6.72972	6.75366	6.95088	6.77647	6.54953	6.84793	6.89538	6.63683	6.91948	6.77828	6.55812	6.77608	6.59305	6.45456	6.7772	6.62491	6.83488	6.59942	6.61959	7.29254	7.21718	7.67433	7.56187	7.57247	6.52576	7.36544	6.56574
SBSPON	3.65017	3.79698	3.60162	3.45888	4.49126	4.24305	4.40845	4.74161	5.47003	4.49663	5.33278	3.90792	4.2807	4.07136	3.94145	5.32629	5.4331	4.23786	4.80155	4.11373	4.46898	5.19809	3.60452	3.88227	4.37839	4.02865	4.18597	4.05319	3.85593	3.74242	3.94975	3.90976	4.15175	4.43897	3.71291	4.42767	4.15094	4.65836	4.1068	3.49944	3.58851	3.67471	3.69743	3.61328	3.36526	3.39574	4.17685	3.70105	4.70633
SCFD1	6.63503	6.59617	6.58122	6.56167	6.68285	6.64839	6.68941	6.67177	6.52441	6.62525	6.65996	6.58599	6.60851	6.4938	6.67466	6.61017	6.50909	6.52605	6.71867	6.69566	6.74152	6.70965	6.73344	6.75121	6.7015	6.57913	6.56287	6.56669	6.70245	6.53584	7.00038	6.7999	6.45519	6.50459	6.72094	6.62727	6.78713	6.75625	6.64046	6.53649	6.60785	7.05891	7.05344	7.30409	7.15117	7.42749	6.99566	6.88904	6.51835
SCGB1A1	3.10055	2.36505	2.92367	2.89236	3.11321	3.08048	3.25688	3.00251	3.03748	2.79398	3.02696	3.08856	3.05132	3.05774	2.95753	3.04328	3.43033	2.88121	3.10663	3.05675	2.75237	4.93328	3.22303	3.03525	2.8276	2.76254	2.83449	3.58342	3.09549	3.17153	2.80958	2.83237	3.57293	3.00313	3.12652	2.82016	2.77971	2.98376	2.77572	2.94152	2.88234	3.11035	2.94989	2.98354	2.92855	3.10604	3.10562	3.16106	3.27068
SDC1	10.0127	9.85499	9.10871	9.18399	9.19972	9.45485	9.98835	7.15986	6.92723	7.96997	8.33578	8.97188	7.53999	7.63004	9.21604	8.3071	7.972	8.32055	7.83996	7.82731	8.8302	8.29438	8.66943	9.69214	8.19934	8.3509	8.28555	9.46467	9.67179	9.63745	8.09696	9.17303	8.45492	8.53213	9.38698	8.92627	8.10508	8.27449	8.02308	6.29989	5.95347	7.7725	7.4412	7.70137	7.4568	7.23605	7.3944	7.56454	7.76568
SDC2	8.13481	8.21414	7.6704	7.67544	7.50273	7.46627	7.54053	7.88882	8.64765	6.4279	7.75102	7.1839	7.58167	7.25608	7.76399	7.36354	7.66047	7.67594	7.6791	8.13121	7.8925	7.5496	7.37008	7.73871	7.41835	7.78553	7.60135	7.61429	7.5776	7.84965	8.20823	8.24403	7.66438	7.52599	8.11205	7.95117	7.32861	7.75973	7.92661	7.30546	7.37908	8.67518	8.8107	8.6884	8.66648	8.78653	6.56073	8.70143	7.5042
SDC3	5.1635	5.47111	4.50636	4.5925	4.44639	4.4577	5.19563	4.81093	4.82358	5.10075	5.20271	4.67319	4.60989	5.49434	4.66286	4.59846	4.75673	4.80873	4.58489	4.79898	4.62952	4.83284	4.58047	4.671	4.72591	4.85583	4.8793	4.89604	4.89694	5.06884	4.39407	4.64631	4.83781	4.57109	5.14485	4.87525	4.74965	5.01398	4.92407	5.60257	6.05575	4.73987	5.22084	4.75531	5.30217	4.65592	5.47358	4.80269	4.94109
SDC4	10.4004	10.2067	9.48491	9.3094	9.86262	9.52485	10.9201	9.16359	9.47919	8.6506	9.70774	9.45271	10.1626	8.32308	10.1464	8.30945	9.79711	9.80957	10.5133	9.43556	9.34294	10.1523	9.83833	9.8765	9.34814	9.74313	9.46056	10.0342	9.68653	11.2174	9.04992	8.97601	9.88394	10.1333	8.60424	9.76295	9.97607	9.35574	9.03277	7.93877	7.36591	8.83804	8.76474	8.88574	8.77252	8.57318	8.04468	9.19643	8.69931
SDF2L1	7.3526	7.35437	6.92978	6.86219	7.11432	7.07161	7.5218	6.28013	7.11851	7.3477	6.96747	7.64676	7.12814	6.60355	7.47257	6.80675	7.08149	6.27676	6.75121	6.88049	6.21143	7.25907	6.82965	7.11013	7.25516	6.78788	7.05146	6.612	6.84833	7.38874	7.57709	7.10428	7.03645	6.81921	6.45904	6.9013	7.23467	6.89158	7.07239	6.90885	6.78529	8.53121	8.34533	8.40992	8.43508	8.42642	6.6313	8.1155	6.7999
SEC13	9.60203	9.63069	9.65158	9.67397	9.47919	9.61736	10.14	9.36433	9.68653	9.3059	9.57971	9.89442	9.5164	9.64914	9.6421	9.23126	9.73065	9.31679	9.48491	9.61312	9.41436	9.74313	9.73844	9.78732	9.63523	9.70509	9.74586	9.16059	9.54937	9.51993	9.70509	9.76295	9.51993	9.55378	9.83607	9.54747	9.64914	9.59082	9.70509	9.31839	9.47517	10.0591	10.2138	10.0982	10.2477	10.0815	9.21123	10.4621	9.60877
SEC16A	8.17074	8.0513	8.18258	8.45253	7.85163	8.0578	8.71096	8.47965	8.40488	8.22168	8.06326	8.02915	8.07576	8.25841	8.02447	8.32703	8.27449	8.27213	8.03811	8.0821	8.20747	8.52659	8.06404	7.82845	8.19801	8.12304	8.26521	8.43161	8.21054	8.42992	8.60738	8.00471	8.32703	8.25462	8.78049	8.71326	8.35186	8.28397	8.31659	8.04875	8.0578	8.38734	8.87716	8.63252	8.46371	8.63252	8.28168	8.73483	8.31027
SEC16B	4.30188	4.48077	5.19731	5.37635	4.60013	4.71118	4.56463	4.33687	4.24624	4.13958	4.33035	4.91362	4.27756	4.32232	5.23273	4.45191	4.53152	4.53379	4.41854	4.27948	4.82521	4.48101	4.59707	4.61298	4.56322	4.80407	4.36427	4.53183	4.67127	5.0474	4.70777	5.24402	4.88681	4.70181	4.4026	4.85708	4.49349	4.51602	4.57396	4.57965	4.57506	4.62002	4.54695	4.61696	4.72092	4.68433	4.28957	4.6822	4.39097
SEC22A	5.63399	5.47944	5.54247	5.47777	5.65004	5.28935	5.68485	5.3667	5.19349	5.39476	5.43682	5.24812	5.55319	5.2604	5.50162	5.47411	5.61698	5.41498	6.26586	5.99351	5.78755	5.40611	6.10493	5.78134	5.49542	5.2708	5.38997	5.47886	5.54221	5.99266	5.56458	5.83743	5.3973	5.54146	5.60071	5.76265	5.27618	5.61046	5.29292	5.67449	5.67262	5.30591	5.26982	5.69406	5.42424	5.42167	5.66293	5.55524	5.28058
SEC22B	8.6616	8.35935	8.53962	8.19519	8.64473	8.09833	8.39973	8.33264	8.48079	8.66556	8.82804	8.71216	8.92025	8.69931	8.57871	8.3618	8.51216	8.3641	8.81801	8.51831	8.17001	7.85286	8.32948	8.17074	8.07286	8.37554	8.21199	8.00877	8.18921	7.8709	8.96198	8.25931	8.70457	8.29364	8.23364	7.94726	8.31659	8.40062	8.58179	8.441	8.25607	9.2709	9.13923	9.77024	9.40738	9.28095	8.62349	9.06702	8.57318
SEC22C	5.27864	5.34171	5.32162	5.28027	5.23982	5.16425	5.19651	5.65029	5.46267	5.6057	5.27508	5.28117	5.50961	5.52785	5.36413	5.32966	5.35921	5.29212	5.44323	5.42275	5.3844	5.23045	5.5053	5.21364	5.18945	5.34843	5.41572	5.28935	5.19349	4.99222	5.363	5.19993	5.2778	5.20901	5.38756	5.27349	5.3693	5.28547	5.42606	5.55875	5.57025	5.47751	5.27838	5.85434	5.5053	5.47588	5.74423	5.3761	5.42005
SEC23A	8.44906	8.3501	8.29521	8.65249	8.29521	8.58278	8.59173	8.44992	8.34379	7.73281	8.18687	8.4134	8.00352	8.10028	7.99453	8.00533	7.85092	8.08894	7.96618	7.92661	8.06119	8.31027	8.03658	8.56356	7.92973	7.90694	8.26434	8.36567	8.37395	8.34456	7.89501	8.32948	8.06194	7.74237	8.76896	8.12098	8.21568	8.65436	8.14615	8.11351	8.09301	6.49351	6.78788	6.82792	6.65485	6.91867	7.542	6.56038	8.42992
SEC23IP	6.02241	6.20224	6.32276	6.27123	6.23328	6.26237	6.4394	5.8846	5.70291	6.06458	5.92005	5.93467	6.01045	5.86358	5.94259	5.71919	5.88576	5.77206	5.85462	5.79453	6.06804	6.00788	5.86329	5.87115	6.13423	5.98634	6.06001	6.10354	6.30208	5.90954	6.01432	6.32468	6.11377	6.09205	6.16891	6.27034	6.09033	6.06202	5.95156	6.05742	6.05121	5.76593	5.87	5.92005	5.93326	5.76022	6.09611	5.97105	6.04024
SEC24A	6.70608	7.06511	6.69464	6.65828	6.59439	6.44286	7.21277	6.25106	6.56287	6.45028	6.28932	6.94575	6.33371	5.75104	6.58763	6.30776	6.19321	6.15234	6.43558	6.09344	6.07998	6.54181	7.30315	6.4176	6.57547	6.24423	6.33343	6.4925	6.5724	6.90535	6.54145	6.80356	6.66517	6.15623	6.6424	6.22685	6.58663	6.46999	6.35662	6.26171	6.39048	6.73409	6.87219	6.79365	7.08977	7.02677	6.63339	6.74803	6.33435
SEC24B	9.41609	9.52692	9.40155	9.61736	9.15288	9.23126	9.48303	9.58418	9.35206	9.41262	9.44857	9.2709	9.43556	9.38874	9.12562	9.54163	9.36835	9.56689	9.53962	9.33421	9.4587	9.22941	9.47719	9.83109	9.26279	9.30101	9.08366	9.37195	9.16657	9.09955	9.01573	9.01846	9.2709	9.10276	9.32905	9.12128	9.30252	9.22631	9.2845	9.65363	9.45271	8.85651	9.5184	9.24164	9.16817	9.341	9.65594	9.2494	9.19823
SEC24C	8.13343	8.04675	7.98162	8.0701	8.34456	8.52194	8.45158	7.84646	7.9566	8.03114	7.8709	8.07286	7.89779	7.78494	8.02583	8.25691	8.24706	7.91775	7.92409	7.95533	7.84055	8.27449	8.17517	7.69197	8.07083	7.92292	8.32703	8.01581	7.98989	8.32622	7.76511	8.17366	8.16178	7.88229	8.35853	8.64765	8.15756	8.01006	7.99389	8.18339	8.03114	7.7363	7.83936	7.71013	7.85163	7.53782	8.04813	7.93998	7.95596
SEC24D	6.64179	6.78596	6.71477	6.68285	6.56774	6.5533	6.77035	6.75941	6.25686	5.69084	6.5401	6.32309	6.18292	6.58536	6.62888	6.72234	6.32562	6.34496	6.66864	5.93836	6.58316	6.72094	6.29333	6.53226	6.37485	6.21932	6.63683	6.37113	6.52993	6.801	6.54452	6.84128	6.4394	6.42564	6.92139	6.81545	6.54145	7.00832	6.29064	6.25781	6.35959	6.18402	6.17757	6.52861	6.20578	6.36476	5.84464	6.2031	6.58473
SEC31A	9.95305	10.1232	10.4125	10.3763	10.0309	9.89442	10.6046	9.98835	10.2034	9.49469	10.0185	9.79463	10.1046	9.93519	10.2172	9.8765	10.14	10.3962	10.2001	10.1694	10.4198	10.3504	9.71023	10.2656	10.1176	10.3365	10.1203	9.89442	10.0914	9.90882	10.5948	10.2699	10.1176	10.262	10.7135	10.251	10.1589	10.292	10.3365	9.51993	9.64914	10.7034	10.855	10.7187	10.7401	10.8716	9.34294	10.6	10.0277
SEC61A1	8.51666	8.36258	8.31027	8.37803	8.32208	8.49837	8.16932	8.2224	9.05732	8.14615	8.39641	8.46651	8.62052	8.32548	8.8302	8.10164	8.67232	8.6485	8.12385	8.72285	7.96875	8.37554	8.54661	8.66268	8.25931	8.91518	8.24706	8.42992	8.19356	7.78153	9.32381	8.38984	8.50609	8.5192	8.45253	7.94992	8.42992	8.33034	9.00383	7.84836	7.58167	9.98527	9.97895	9.99121	10.0946	9.95305	7.80244	10.0851	8.2737
SEC61A2	3.90894	4.01472	3.91914	4.06962	3.95979	3.79748	4.09801	4.05057	3.99869	4.15639	4.05923	4.08819	4.0747	4.17257	4.21669	4.00641	4.09943	3.77132	4.00669	3.84844	4.02304	4.14399	4.2997	3.78992	4.1057	4.06882	3.99456	4.17685	4.03753	4.19029	4.06477	3.98809	3.99161	3.97231	4.25131	4.28642	3.91806	3.98941	3.95372	3.91622	3.93675	3.85382	3.90976	3.82505	3.58123	3.71819	4.09502	3.84043	4.08215
SEC61B	7.80373	7.54732	6.9139	7.0704	6.97603	7.11851	6.80822	7.52275	7.66331	7.46293	7.27956	7.38925	7.50676	7.55165	7.46674	7.2468	7.47408	7.25953	7.26167	7.52599	7.01417	7.70247	7.17608	6.98185	7.14508	7.51622	7.0332	7.10381	6.91835	7.08939	8.15893	6.90164	7.29672	7.28071	7.45489	6.92403	7.16951	7.22102	7.70247	7.15206	7.14001	8.28715	8.36837	8.34766	8.3334	8.27139	7.64676	8.38568	7.17106
SEC61G	10.2337	10.3962	9.8489	10.0748	10.1232	10.1464	10.3763	9.42852	9.95878	9.80477	9.79962	10.0498	9.93519	9.78487	10.2583	9.61312	9.88932	9.67914	9.79235	9.91742	9.59082	9.98527	11.0949	10.66	10.0217	10.0722	9.85183	9.70509	9.8489	10.0127	10.3365	9.88709	9.72547	9.66085	10.1824	9.75559	9.70774	9.94437	10.13	9.79235	9.7154	10.6793	10.6381	10.483	10.5003	10.855	9.62205	10.5908	9.82019
SEC62	8.38639	8.422	8.19598	8.3127	8.3609	8.42739	8.35598	8.65641	8.48594	8.43161	8.3692	8.24867	8.41241	8.57505	9.41797	9.15886	8.28715	8.43431	8.32771	8.64049	8.75931	8.38568	8.41946	8.45492	8.11416	8.62943	8.28965	8.2045	8.35264	8.59777	8.72841	8.49062	8.42118	8.83804	8.31027	8.60155	8.58888	8.49415	8.65335	8.79172	8.83133	8.94393	9.14844	9.04017	9.16657	9.26941	8.66268	8.96761	8.18921
SEC63	6.29159	6.57639	6.55296	6.50633	6.55055	6.5067	6.28131	6.79214	7.12443	6.28374	6.70431	6.20167	6.66791	6.5424	6.67566	6.81342	6.7469	6.65792	6.5319	6.96969	6.87897	6.4329	6.30584	6.51036	6.61992	7.11432	6.54353	6.43359	6.54758	6.30304	7.26821	6.68488	6.53614	6.73903	6.58729	6.40464	6.61404	6.44966	7.16024	6.44355	6.45996	7.93998	8.09361	8.20898	8.22759	8.35764	6.45677	7.93549	6.25781
SEL1L	6.47701	6.55124	6.46435	6.30304	6.73344	6.42268	6.14282	6.14123	9.11983	6.50188	6.52005	6.60649	7.58543	6.21552	7.03027	6.22418	7.58436	7.03645	6.59773	8.26758	5.97535	6.79918	6.2572	6.65273	6.58438	8.52749	6.43166	6.42397	6.24886	5.63257	9.75815	6.34098	7.41786	7.8604	6.27898	5.77206	6.77286	6.48917	8.69152	6.40315	6.56937	10.66	10.6287	10.7343	10.6335	10.6095	6.71334	10.354	6.43017
SEMA5A	6.33465	6.13364	6.12955	6.02343	5.91541	5.85604	6.08399	7.16669	6.11346	6.26919	6.44703	5.80867	6.23925	7.16064	5.74226	6.50459	6.18992	5.8391	6.08973	6.14338	6.37762	6.76924	5.37347	5.80064	6.1466	5.8627	5.9805	5.52937	6.02987	6.32843	6.23665	6.92139	5.94459	5.78368	6.21843	6.59805	6.508	6.28743	6.32692	7.28722	7.29766	6.3196	6.13765	5.90088	5.80837	6.42047	6.72234	5.97479	6.39915
SEMA5B	6.28872	5.78647	5.76565	6.25811	5.85689	5.99004	6.28497	5.94348	7.19221	6.44109	6.35252	6.12955	6.50599	7.47016	6.11069	5.92604	6.00902	6.62128	5.87034	6.91572	5.94059	5.62389	5.75639	6.17279	5.86439	6.66517	6.02925	6.17668	6.23809	6.63372	7.16456	6.28774	6.36592	6.8206	6.39017	6.02641	6.12537	6.04626	7.14983	6.02559	6.02759	7.65499	8.43431	7.54053	8.1546	8.33499	6.22685	8.01373	6.46966
SERPINA1	7.84965	7.82484	9.89205	9.91742	8.17669	8.14191	8.57505	7.71635	8.03048	7.11723	6.90164	8.75479	9.40155	7.29018	9.79962	6.73871	9.00668	9.21604	8.5496	8.35186	8.84256	9.00533	8.69383	9.24164	8.41241	8.50609	8.72841	9.3273	8.08602	7.84399	8.04539	8.97327	9.66284	8.42911	7.42792	7.48439	7.34998	8.2359	8.4878	7.11388	7.22701	7.05525	6.71132	6.83672	6.612	6.33217	6.22073	7.07896	7.45929
SFTPD	3.27153	3.16931	3.64595	3.51191	3.72149	3.76405	4.54897	3.05478	4.10792	3.0305	3.12956	3.30038	3.88364	3.2531	3.8161	3.27956	3.70132	3.6319	3.6251	4.42056	3.41515	3.87454	3.18236	3.81475	3.38159	3.8896	3.62786	3.81162	3.63755	3.52626	3.96035	3.54289	4.02304	3.86228	3.20988	3.52415	3.2408	3.56675	4.40427	3.56887	3.37591	4.77306	5.07957	4.98177	5.38624	5.07826	3.02501	4.69389	3.60208
SGMS1	7.43082	7.20407	7.10296	7.05265	7.20185	7.04071	7.50473	7.95406	7.83091	7.12983	7.75159	7.05188	7.25739	7.6704	6.4394	7.79825	7.53886	7.10381	7.52448	7.7051	7.2949	7.36447	7.40221	6.47794	6.8406	7.10644	6.88414	6.97837	6.80277	6.82167	7.4481	7.10644	7.39583	7.6853	7.7886	7.58794	7.47613	7.22789	7.33037	7.43533	7.40221	7.09122	7.52067	7.28935	7.58492	7.32592	7.36544	7.05344	7.46728
SLC17A5	7.27575	7.25086	7.61272	7.92165	7.24379	7.31919	8.34766	7.26695	7.66541	6.90238	7.35398	7.55803	7.45249	7.30266	7.09722	7.11561	7.48572	7.33844	7.48075	7.2468	7.38627	7.54102	7.28585	7.67314	8.03186	8.0661	7.3526	7.43579	8.20372	7.47503	7.11388	7.96618	7.63848	7.30688	7.58636	7.69591	7.19829	7.2949	7.14689	7.24196	7.1578	6.91351	7.17407	7.11299	7.02206	7.48859	6.89712	7.59479	7.1753
SLC26A2	6.91189	6.9176	7.35398	7.60083	7.08149	7.19135	7.30499	8.32948	7.27575	7.29672	6.88338	7.49814	7.31484	7.16791	7.44655	7.10296	7.53469	7.15162	7.35398	7.24291	7.28975	7.48183	6.98309	7.21849	6.95051	7.41876	7.38627	7.13773	7.18723	7.23342	7.31794	7.21718	7.46774	7.11601	7.54242	7.0464	7.542	7.61162	7.93941	7.05379	6.85884	6.68453	6.90088	6.60317	6.91152	7.05411	7.62465	6.93679	7.28585
SLC35A1	8.71096	8.37554	9.21453	9.33256	9.19173	9.17624	8.7166	8.88945	8.49503	9.09198	8.904	8.93352	8.61485	8.95564	8.7818	9.14686	8.62943	8.69597	8.80301	8.72512	9.54937	8.53873	8.422	9.19008	9.66085	9.60203	9.23653	9.27566	9.47517	9.09198	8.859	9.49679	8.98139	9.0979	8.80414	9.58418	8.90028	8.65335	8.89555	9.13625	9.04017	8.66377	8.90028	8.66057	8.5597	8.62052	8.71445	8.15325	8.91295
SLC35A2	5.51303	5.76796	6.0871	6.16983	5.57245	5.69954	6.28013	5.22831	5.34254	5.26961	5.3255	5.52759	5.28001	5.14539	5.7505	4.96553	5.25588	5.23982	5.17098	5.2767	5.19324	5.42685	5.73974	5.77206	5.64234	5.84687	5.46665	5.48703	5.86132	5.73999	5.24667	5.63343	5.34389	5.47915	5.46692	5.58383	5.26091	5.37735	5.34117	5.39946	5.3299	5.25905	5.40436	5.47886	5.61321	5.47559	5.2299	5.54069	5.52468
SLC35C1	6.12821	5.88968	6.25325	6.15745	6.37513	6.27676	6.71724	5.87226	6.25751	6.00554	6.14123	6.40252	6.0937	6.11121	5.94562	5.72371	5.9751	6.09314	5.84547	5.99266	6.03459	6.07817	6.2346	6.08456	6.25866	6.36449	6.07027	6.25537	6.39978	5.95605	6.08513	6.26556	5.94562	6.21388	6.39915	6.10326	6.06938	5.87899	6.06859	5.5833	5.51378	6.67215	6.50939	6.80609	6.7273	6.74185	5.48022	6.69566	6.03175
SLC35C2	5.61344	5.62277	5.61451	5.68158	5.4271	5.57877	5.76315	5.48297	5.49589	5.50023	5.66551	5.61072	5.55634	5.95947	5.75772	5.45758	5.38332	5.74637	5.49513	5.55291	5.5508	5.64596	5.7445	5.73703	5.61563	5.65271	5.66293	5.70238	5.6663	5.76826	5.63454	5.59013	5.43919	5.6367	5.67347	5.57108	5.70859	5.45888	5.66496	5.53405	5.51881	5.67974	6.09147	5.98607	6.04183	5.90982	5.5391	5.7359	5.52914
SLC39A8	5.1346	5.00261	4.43163	4.36509	4.23388	4.23591	4.19937	4.3344	5.47944	4.59816	4.4835	4.43241	4.77757	4.12496	4.53549	4.31626	4.44047	4.51486	4.1623	4.77649	4.15886	4.50341	4.76955	4.80069	4.21787	4.93994	4.35473	4.10104	4.33774	4.03291	5.2981	4.30325	4.5587	4.74443	4.33832	3.96642	4.62335	4.48752	5.27188	4.32651	4.33687	6.32966	6.41259	6.74621	7.02291	6.70183	4.41907	6.4108	4.49066
SLC51B	3.55882	3.55476	3.31444	3.87974	3.76405	3.74135	3.6533	3.401	3.55259	3.5166	3.60973	4.96772	3.53354	3.59525	3.33057	3.67258	3.30708	3.8572	3.63261	3.63139	3.87776	3.91176	3.66989	3.71363	3.48982	3.71567	3.88417	3.77939	3.63905	3.83327	3.62762	3.84021	3.69374	3.76082	3.60524	3.53443	3.79773	3.53183	3.7563	3.6233	3.7398	3.7842	4.11977	3.42948	3.7696	3.66045	3.76057	3.58876	3.48852
SLC7A11	5.33122	5.50368	5.37242	5.39453	5.73243	5.64596	6.54077	4.23723	5.74061	4.58157	4.85658	5.44219	4.65374	3.80654	5.68322	4.28898	4.40427	5.94034	4.63454	4.76871	5.81554	4.94401	5.21523	6.45968	6.87025	6.27311	5.04253	6.4329	6.29308	5.17157	5.37242	5.67024	4.94109	4.88283	6.10267	4.4738	4.42882	4.58629	5.59632	4.25621	4.07087	5.91389	5.87871	6.07517	6.15893	6.85527	4.52686	7.41786	4.37037
SLMAP	5.66996	5.88009	5.87338	5.83417	5.70959	5.76621	6.08973	5.90001	6.30015	5.74611	6.43077	6.05884	5.56458	5.34945	5.58171	6.04105	5.40491	5.30591	5.62032	5.29527	5.68797	5.80064	6.24829	5.70122	5.55686	5.1591	5.74197	5.75252	5.78107	5.56404	5.18376	5.85689	5.62442	5.41279	5.70517	5.68055	5.85079	5.74938	5.087	5.59461	5.52445	4.58298	4.97657	4.82097	4.89146	4.84708	5.79731	4.50722	6.12986
SPON1	6.55395	6.60785	7.29587	7.32283	7.20969	7.2415	7.20969	8.71755	6.97488	5.84848	8.03314	6.97289	7.48488	8.54354	6.87939	7.74473	7.60672	6.40829	7.24772	6.97047	7.37722	7.9272	5.386	7.18257	6.50761	6.39453	7.74696	6.81477	6.69357	7.3786	6.53683	7.07772	6.88118	6.28074	7.8327	7.4624	8.31346	8.74717	7.61696	4.84178	4.85985	4.67838	4.67127	4.65674	4.65516	4.59077	5.21389	4.61868	8.01992
SPON2	9.02113	8.98019	9.76295	9.73572	8.99057	9.04304	9.39238	9.69498	7.90033	7.52791	8.77469	9.60877	9.46056	9.78984	9.56885	8.68098	9.68395	9.10585	9.26775	8.47965	9.55819	9.6421	7.86644	9.41981	9.3059	8.73822	9.19643	9.14236	9.27399	9.80248	8.48346	9.5164	8.73058	8.40152	9.17932	9.8814	9.11983	8.84018	8.72401	8.4283	8.46831	7.1541	7.46963	7.51338	7.25127	7.87272	6.42268	7.60672	8.94527
SPPL3	5.64286	5.73243	5.5386	5.50717	5.63863	5.65784	5.47886	5.38492	5.35443	5.65595	5.45364	5.56241	5.58305	5.54619	5.42005	5.582	5.56118	5.47168	5.61729	5.55719	5.66996	5.60419	5.43948	5.27188	5.54097	5.68654	5.611	5.73405	5.363	5.67567	5.57054	5.62467	5.60362	5.30617	5.5029	5.516	5.48324	5.45784	5.35026	5.92987	6.02614	5.4376	5.42734	5.32293	5.21364	5.31033	5.72371	5.36186	5.39322
SPTA1	3.19243	3.01906	2.98565	2.90337	3.0295	2.73732	2.86481	2.97941	2.93717	2.71916	3.19308	3.05614	2.93213	3.02296	2.92244	2.79091	2.71613	3.00428	2.62687	2.90581	3.05285	3.60286	2.92285	2.83708	3.17975	3.02098	2.80857	3.03544	2.95236	2.80326	2.77093	3.00738	2.777	2.65694	3.27602	3.03709	3.06966	2.84195	3.29869	3.07481	2.95416	3.67192	3.17381	2.97899	3.2735	2.73643	2.87176	3.09788	2.68875
SPTAN1	5.95374	5.87	6.18121	6.34651	6.23018	6.35995	6.37239	6.66625	6.40645	6.07605	6.28497	6.07722	6.41889	6.63576	5.9938	6.56344	6.24102	6.3529	6.1779	6.01317	6.56411	6.48559	5.99747	5.89701	6.17122	6.26586	6.27831	6.46279	6.44109	6.62128	6.27375	6.28404	6.4279	6.31394	6.36747	6.46933	6.47096	6.44034	6.50599	6.27866	6.29276	6.27095	6.30552	5.72885	6.01852	6.06831	6.1481	6.26055	6.30453
SPTB	4.16608	4.12577	4.47091	4.59077	4.3872	4.37401	4.44532	4.7798	4.94529	4.31626	4.44503	4.33497	4.63737	4.76422	4.41631	4.57032	4.52713	4.61214	4.31247	4.80571	4.27041	4.43163	4.49461	4.49238	4.27756	4.89986	4.31626	4.5587	4.40024	4.32874	4.88546	4.22926	4.55456	4.71205	4.49291	4.36119	4.5293	4.34734	4.74653	4.0983	4.1935	5.31222	5.56482	5.47915	5.67682	5.2258	4.40543	5.69656	4.35977
SPTBN1	5.20852	5.25334	5.47034	5.53513	5.58953	5.63992	5.31571	5.87034	5.60813	5.34441	5.66714	5.45487	5.3761	5.71754	5.53513	5.6666	5.35361	5.58279	5.30396	5.35657	5.91041	5.32892	5.11483	5.41973	5.44644	5.69055	5.45507	5.6407	5.61535	5.48971	5.43979	5.72229	5.45918	5.61321	5.32162	5.53885	5.42967	5.50607	5.43152	5.46665	5.59357	5.23351	5.3693	5.33909	5.23351	5.19349	5.53345	5.17653	5.50081
SPTBN2	4.5734	4.64861	5.444	5.58042	5.79947	5.88919	5.43979	4.70333	5.2596	4.97683	4.72871	5.14889	5.35413	4.16687	5.2604	4.66962	4.90773	5.21708	5.1563	5.05771	5.12653	5.07122	5.9048	5.61946	5.00558	5.52519	5.63804	5.50422	5.97134	5.46507	5.34869	5.11761	4.80675	5.65569	4.59221	5.26636	4.54224	5.1446	5.18917	4.34289	4.70719	6.04491	6.20605	6.49873	5.92901	6.01346	4.21312	6.32966	4.97441
SPTBN4	4.81774	4.53637	4.70129	4.80675	4.82973	4.85145	4.89578	4.79159	5.30981	4.73026	4.74366	4.66593	5.05635	5.00584	4.76174	4.73657	4.68463	5.10977	4.78797	5.20879	4.7787	4.58047	4.83751	4.94287	4.63152	5.12564	4.64076	4.64354	4.85763	4.85229	5.41145	4.79159	4.73217	5.0651	4.9876	4.64437	4.96348	4.74106	5.11978	4.83234	4.85708	5.87783	5.71998	5.86383	6.16375	6.02023	4.86695	6.04491	4.83284
SPTBN5	4.52578	4.1228	4.53977	4.5534	4.41907	4.60568	4.25352	4.61133	4.82842	4.45989	4.37674	4.46706	4.30244	4.61898	4.57481	4.57586	4.69787	4.74215	4.91447	4.59105	4.15233	4.43377	4.42767	4.72706	4.53294	4.2223	4.44389	4.27232	4.49743	4.22507	4.73821	4.12437	4.79274	4.70884	4.74334	4.19612	4.42824	4.74302	4.66033	4.5587	4.02602	4.75649	4.78608	4.59509	4.92703	4.92594	4.56868	4.51545	4.55175
SRD5A3	6.75835	6.99534	7.4624	7.36496	6.41622	6.40861	8.00471	5.75104	5.93722	6.11595	5.89701	6.45318	6.87184	5.29238	7.17778	5.86558	6.35597	6.9013	5.9566	5.75359	7.16755	6.51259	7.12775	7.79705	6.83116	5.89185	5.92929	7.04558	8.17439	6.69741	6.17486	6.27643	7.01342	5.94562	6.11069	6.76924	6.4223	6.62562	5.95633	5.94	5.97273	6.5674	6.65132	6.85685	6.76603	6.45318	5.40982	6.45553	6.26356
SRI	8.1546	8.3633	8.91657	8.91408	9.28095	9.32549	9.67397	8.73271	8.4878	8.52384	8.98019	8.78414	8.6506	8.54076	8.70999	8.75714	8.57411	8.85793	8.87278	8.65541	9.27262	8.67427	8.61674	8.52194	8.96761	8.81192	8.91907	9.12422	9.14236	8.97059	8.50317	8.72173	8.70038	8.78653	8.70457	8.93096	8.61398	8.97188	8.536	8.39471	8.49233	8.37228	8.39471	8.32465	8.2516	8.51032	8.34125	8.28329	8.48594
SRP9	12.3665	12.1969	12.0823	12.1784	11.8281	11.7689	12.5187	11.5984	11.5112	12.5834	12.2398	12.0125	11.6818	11.7562	11.9641	11.9951	11.871	11.8422	11.9641	11.7439	11.8281	11.5335	11.7439	12.2808	11.9015	11.7562	11.871	11.9787	12.0622	11.4234	11.9641	11.857	12.0288	11.857	11.7192	11.871	11.8142	11.7689	11.705	12.6683	12.3236	11.9641	11.9015	11.9641	11.8422	11.857	12.1029	11.871	12.044
SRPRA	8.48594	8.37228	8.00282	8.01509	8.14191	8.26108	7.64572	8.4203	9.20983	8.61674	8.3641	8.41434	8.84018	8.48688	8.38047	8.29682	8.79739	8.58502	8.25691	8.84503	8.1355	8.02169	7.95049	8.41782	8.47608	9.16059	8.40233	8.49233	8.16372	7.321	9.54163	8.30328	8.31423	8.52098	7.82484	7.80483	8.49765	8.21487	9.20148	8.30086	8.14401	10.1589	10.0914	10.1333	10.1364	9.91742	8.39641	10.1855	8.32548
SRPRB	6.87415	6.82023	7.10428	6.86445	6.97331	6.81302	7.01898	6.58896	7.31343	6.83782	6.50531	7.18086	6.78788	6.4279	7.16282	6.52116	7.06176	6.81706	6.65723	7.19966	6.48075	6.95661	6.91311	7.04596	6.65379	7.01938	6.73693	6.43745	6.65586	6.88748	7.83515	6.86883	6.85527	7.14983	7.01417	6.76289	6.96268	6.70965	7.45006	6.2572	6.26681	8.72173	8.48428	8.75833	8.54777	8.46098	6.54353	8.49947	6.66721
SSR4	11.016	10.9743	11.2101	11.0949	10.9681	10.855	10.6194	10.5342	11.7192	11.3301	11.2401	11.49	11.1955	11.3477	11.2249	11.3118	11.3301	11.2778	10.8659	11.5984	10.7089	11.4596	10.4664	10.7558	11.357	11.6937	10.9866	10.6838	10.4747	10.3254	12.5187	11.0225	11.2401	11.635	11.1589	10.5856	11.8281	10.8611	11.6474	10.8773	10.9308	12.8185	12.5834	12.838	12.838	12.7536	11.6937	12.6271	10.6647
ST3GAL1	6.7445	6.60317	6.36959	6.42597	6.44167	6.54626	6.79214	6.92978	6.7162	6.53882	6.43686	6.46682	6.54982	6.75155	6.28473	6.43745	6.51003	6.78931	6.16541	6.6825	6.43501	7.08064	6.85121	7.09469	6.82563	6.63884	7.38423	6.89272	6.49549	6.18349	6.48987	6.84504	6.67177	6.14488	6.77962	6.86775	6.71405	6.59869	6.82268	6.50909	6.40193	6.06342	6.29193	6.21992	6.36476	6.2043	7.32236	6.67141	6.53226
ST3GAL2	5.67449	5.38175	5.4454	5.46321	5.4427	5.54433	5.3761	5.61187	5.50216	5.53618	5.67626	5.39297	5.50472	5.6608	5.40746	5.43041	5.42632	5.62831	5.19296	5.43099	5.36847	5.41738	5.35849	5.45435	5.32025	5.56209	5.47003	5.19375	5.47411	5.53756	5.53153	5.29212	5.38358	5.41973	5.444	5.56118	5.73539	5.59963	5.55719	5.80894	5.64949	5.97739	5.93494	5.94796	6.25325	5.81582	5.60337	5.87115	5.61265
ST3GAL3	4.32544	4.21838	4.24383	4.28008	4.23591	4.23248	4.29943	4.34901	4.48434	4.30884	4.31572	4.25649	4.43105	4.63828	4.27728	4.39407	4.41967	4.37839	4.24408	4.41262	4.22645	4.24873	4.32398	4.32625	4.30607	4.41743	4.29738	4.2807	4.35837	4.25994	4.40341	4.20024	4.3746	4.49013	4.30055	4.29019	4.37512	4.31272	4.45024	4.43866	4.31025	5.31999	4.99138	4.72563	4.98732	5.03204	4.35811	4.8939	4.37977
ST3GAL4	4.20465	4.30998	4.19992	4.14017	4.28257	4.2262	4.88486	4.62669	4.36149	4.1418	4.26824	4.18334	4.36879	4.29711	4.33804	4.10136	4.32517	4.36067	4.4695	4.28208	4.49604	4.36738	4.33578	4.71731	4.33857	4.15918	4.26768	4.39006	4.69787	4.43611	4.17389	4.42994	4.24786	4.16608	4.29711	4.95581	4.57032	4.46414	4.19029	4.57273	4.52165	4.74019	4.14844	4.2248	4.32517	4.43495	4.05781	4.5695	4.30912
ST3GAL5	5.00317	5.13297	4.82436	4.68812	4.5919	4.67208	4.75476	4.76594	4.8381	5.02656	4.90476	4.50471	4.70855	5.38971	4.87786	5.04688	4.70855	4.76649	4.63231	4.69389	4.76289	4.84261	4.918	4.43638	4.89794	4.67267	5.23404	4.85253	4.78967	4.92951	5.08804	5.01131	4.75323	4.57506	5.054	4.67293	5.03959	4.92982	4.95034	5.31918	5.61017	4.67153	4.65319	4.71954	4.5274	4.53127	4.92018	4.71555	4.94866
ST3GAL6	4.86755	4.96503	4.7069	4.76594	4.4673	4.48898	4.61354	4.04719	4.36401	4.3966	4.35205	4.57506	4.20048	3.91676	4.54897	4.38663	4.47464	4.52766	4.82436	4.67945	4.60331	4.71238	5.3771	4.5452	4.62845	4.26824	4.61926	4.86695	4.34182	4.53522	4.48666	4.5274	4.69148	4.32817	5.03555	4.68086	4.66513	4.55735	4.21816	4.48127	4.627	3.99821	3.92916	3.8748	3.90976	3.84816	4.22591	3.575	4.53522
ST6GAL1	5.60992	5.6286	5.43734	5.46925	5.16297	5.19704	5.43099	5.48836	5.39164	6.56196	6.44584	5.33991	5.50744	5.75252	5.78503	5.67262	5.46635	5.67567	5.40297	5.47725	5.286	5.54044	5.75826	5.37949	5.46507	5.30481	5.46106	5.60152	5.4387	5.08349	5.32839	5.30645	5.58014	5.01807	5.52419	5.00126	5.96077	5.47138	5.29063	6.16284	5.89586	4.39238	4.67545	4.25073	4.60331	4.41375	6.92331	4.49576	5.95947
ST6GAL2	3.13231	3.6312	4.50444	4.47633	3.54612	3.9186	5.39607	4.78275	4.50779	3.05087	4.42056	3.15228	3.64123	3.9747	4.25327	4.89171	3.97636	3.07524	4.60731	3.40609	3.19879	5.22243	3.59546	4.80816	4.15886	3.17261	3.70255	3.92232	3.53492	4.74851	3.03413	4.15665	3.33506	2.95219	5.25388	4.58733	4.03376	4.81036	3.39681	2.87707	2.71916	2.83563	2.80603	2.777	2.95139	2.76466	2.9641	2.84218	4.35068
ST6GALNAC1	6.18904	6.1875	9.57971	9.47719	8.51831	8.56065	8.11749	6.16512	4.09141	7.17492	7.48957	9.16214	5.154	4.49663	7.7136	6.04375	6.59869	6.57547	6.06428	4.96744	8.76357	5.47915	4.55283	7.87272	8.20524	8.4074	6.83706	7.23816	8.51311	8.58278	6.19958	8.69054	7.86967	8.25006	8.536	8.23038	7.43034	5.99128	5.70487	7.94849	7.92165	4.77897	4.12751	5.64789	5.15704	4.53864	5.37683	3.82639	6.47972
ST6GALNAC2	5.24616	5.5202	5.51245	5.49356	5.83801	5.59907	5.10532	5.29315	5.57054	4.62202	5.00584	5.28001	5.82092	5.0406	5.29369	5.19047	6.014	5.78304	6.35843	6.12006	5.59305	5.38893	5.25177	5.1848	5.0691	5.71575	4.63399	4.84678	4.93768	5.1827	5.64731	4.83338	5.44515	5.48861	4.83981	5.1151	5.07394	5.26906	5.49434	4.68167	4.64604	5.59517	5.64596	5.81247	5.8383	5.61374	4.51215	5.47003	5.16377
ST6GALNAC3	4.06204	4.60935	4.07501	4.23591	3.93168	3.8748	4.29409	4.86098	4.54427	5.36464	5.02135	4.30357	4.03073	4.27094	4.01768	5.05883	4.32232	4.0859	4.36767	4.00324	5.08066	4.19803	3.72072	3.95523	4.00458	4.01579	4.2859	4.34399	3.65135	4.12941	3.9902	4.24708	4.05534	4.27648	4.54779	4.64916	4.92292	4.46842	3.80474	5.49382	5.61535	3.49878	3.62142	3.43769	3.83226	3.9032	5.59963	3.54966	5.54272
ST6GALNAC4	5.3078	5.36027	5.32346	5.21174	5.24537	5.23428	5.4512	5.22634	5.95099	5.53784	5.41335	5.31148	5.39684	5.54299	5.3479	5.30803	5.27138	5.41444	5.03149	5.59849	5.03229	5.45814	5.23045	5.15754	5.17378	5.5825	5.35518	5.07205	5.29583	4.93328	5.92987	5.05908	5.31007	5.52419	5.27349	4.96772	5.52183	5.39946	5.84277	5.85244	5.78023	7.10798	6.83417	7.02248	6.83891	6.87415	5.28935	6.81583	5.45251
ST6GALNAC5	5.40794	5.47671	5.20398	5.23586	4.50753	4.23305	4.74965	5.58355	3.97203	4.07991	3.94741	4.96476	4.1883	4.98732	4.79187	4.40648	4.564	4.04437	4.44277	4.28754	4.45597	5.57513	5.31007	4.7468	4.50315	4.06452	4.30055	4.64437	4.30325	5.25878	4.1399	4.82065	4.89199	4.09203	6.09558	4.59302	4.39715	5.59768	4.41937	4.09003	3.96061	3.6989	3.88446	3.85382	3.59223	3.95603	4.15587	3.88388	4.28813
ST6GALNAC6	5.44323	5.46507	5.26065	5.39476	5.35131	5.35657	5.62996	5.88635	6.0623	5.55003	5.79311	5.00286	5.76399	5.66438	5.54487	5.98776	5.63026	5.65891	5.65784	5.79673	5.78368	6.16861	5.63942	5.23224	5.57304	5.61753	5.72492	5.28462	5.59122	5.5917	5.76709	5.59089	5.26149	5.39403	5.8951	6.01995	5.48022	5.41599	6.0518	5.68766	5.90897	6.53551	6.24763	6.28685	6.62422	6.28968	5.42223	6.02896	5.70959
ST8SIA1	3.5927	4.25455	3.30489	3.38116	3.28082	3.10455	3.06176	3.27956	3.02199	5.04009	3.78783	3.20633	2.96657	3.45544	3.29355	5.50911	3.28298	3.1205	3.47488	3.14128	3.38203	3.52669	3.44452	3.18371	3.27975	2.91097	4.33167	3.01602	3.11381	3.47956	3.04509	3.49628	3.61669	2.85777	3.61875	3.57739	3.57885	3.90922	3.36436	3.43906	3.79952	2.88055	2.79525	2.85179	2.82382	2.77624	4.48181	2.89596	3.59003
ST8SIA2	2.69601	2.77866	2.95199	2.78617	3.2041	3.32147	2.96954	2.90427	2.90007	2.81944	2.85071	2.84335	2.75563	3.02696	3.18693	2.96141	2.88781	2.89511	3.00738	2.91495	2.74233	3.23383	2.76995	3.22212	2.91544	2.7093	2.92833	2.9567	3.04588	3.05733	2.85891	3.60501	2.78894	2.74393	2.76711	3.31147	2.83542	2.87428	3.00101	2.95257	2.89083	2.89575	3.01428	2.73531	2.73923	2.8527	2.64064	2.98546	3.09341
ST8SIA3	3.23343	3.22864	3.68668	3.84947	4.01947	4.01226	3.48513	3.80523	3.85247	3.25565	3.25223	3.51021	4.37512	3.65284	3.98351	4.06452	4.60568	4.06633	4.7648	4.87165	4.58383	4.33007	3.41515	4.10931	4.4615	3.7245	3.83034	4.69556	3.91281	4.29048	3.97636	4.35262	4.39152	4.2449	3.32993	3.80957	3.41188	3.59388	3.76082	3.42969	3.67724	3.41621	3.60138	3.64529	3.74033	3.57098	3.32011	3.70449	3.24141
ST8SIA4	5.98248	6.28044	5.23097	5.21466	5.24721	5.16883	5.20105	5.46294	4.99801	6.07489	5.51964	4.90531	5.33526	5.23018	4.98813	5.53933	5.25532	5.1645	5.62333	5.08095	5.07826	5.82198	5.39348	5.07347	5.35235	4.34624	5.97566	5.23586	4.79783	4.94401	4.52445	5.16627	5.45712	4.45191	5.52183	5.04143	6.0352	5.73188	4.56781	6.53808	6.64209	3.07991	3.06483	3.11279	3.20834	3.15857	6.0093	3.21358	5.62967
ST8SIA5	3.89931	3.95295	3.82639	3.83546	3.77107	3.86732	3.93213	3.95951	3.93911	3.87052	3.7292	3.80755	4.01174	3.90138	4.00267	3.80447	3.94283	3.90525	3.77867	3.94119	3.79042	3.78886	4.00853	3.93168	3.8161	3.90767	3.82057	3.8598	3.9401	3.90241	4.02679	3.65257	3.88778	3.90138	3.88552	3.79828	3.99974	3.81582	3.86915	3.88255	3.94337	4.21509	4.2425	4.0432	4.22424	3.98587	4.04185	4.09116	3.90002
STAU1	9.53162	9.49112	9.55378	9.72294	9.53162	9.60877	10.0946	9.49679	9.75815	9.49287	9.54937	9.5184	9.81465	9.60417	10.0781	9.57971	9.61736	10.3726	9.68133	9.77497	9.78233	9.73301	9.46258	9.61736	9.74586	9.87071	9.62874	9.83607	9.57527	9.82268	10.0527	9.6396	9.82268	10.108	9.6396	9.88394	9.48887	9.5864	9.79463	9.44078	9.45072	10.4385	10.4272	10.2438	10.2992	10.5216	9.32905	10.3331	9.46258
STT3A	7.50775	7.89569	7.86644	7.17864	7.83759	7.14079	7.03604	7.13342	7.31618	7.04272	7.20267	7.52791	7.30454	7.1796	7.76856	6.76147	7.19086	7.33977	7.038	7.06795	7.36447	7.32412	7.35437	7.84965	7.68145	7.43338	7.79228	7.05449	6.88264	6.68549	7.64233	8.21267	7.09599	7.19086	7.20584	6.86883	7.5454	6.9294	7.20662	6.97798	7.35901	8.10232	8.15973	8.54262	8.09893	8.18687	6.91273	7.97267	7.15333
STT3B	6.77647	6.70215	6.72161	6.72475	6.85271	6.78748	6.72693	6.75835	6.72234	6.95237	6.80244	6.7426	6.95088	6.72271	6.62921	6.70323	6.53774	6.78139	6.88531	6.86445	6.71334	6.68578	6.60709	6.85121	6.58413	6.72548	6.82023	6.41915	6.72548	6.64119	7.13601	6.72012	6.68172	6.72475	7.0311	6.66827	6.76147	6.75121	6.93968	6.6997	6.85767	6.98885	7.23218	7.05188	7.15986	7.11978	7.28351	7.14689	6.73009
STX17	6.52959	6.43077	6.26237	6.32692	6.10761	6.11654	5.89672	6.1596	6.28248	6.24731	6.24364	6.37392	6.3049	6.34746	6.1779	6.68647	6.40072	6.3587	6.64931	6.24636	6.38457	6.24456	6.09913	6.01156	6.26408	6.5161	6.18872	6.63683	6.48656	6.23895	6.50838	6.07256	6.24886	6.46027	6.29064	6.48987	6.27524	6.4223	6.37362	6.61165	6.50724	6.32276	6.5502	6.40495	6.62632	6.46149	6.28279	6.60577	6.08823
STX5	6.2094	6.39749	5.76399	5.79758	5.84573	5.85434	6.6424	6.35535	6.47905	5.76315	5.98099	6.15745	6.14904	6.50323	6.20483	5.84332	6.0982	5.8943	5.81953	6.2584	5.94593	6.19382	6.35662	6.47414	6.36178	6.06742	6.22842	5.98099	6.21518	6.38547	6.13857	6.29676	6.13563	5.98895	6.23637	6.05601	6.27928	6.18933	6.07312	6.12336	6.26616	7.16879	6.80609	6.95275	6.80207	6.9578	6.02269	6.73344	6.03317
SUCO	8.46098	8.2367	8.59173	8.84256	8.20898	8.36837	8.72052	8.48594	9.58418	8.45253	8.27139	8.19063	8.84256	8.27528	8.58179	8.92627	8.58704	8.76025	8.3127	8.71951	8.47348	8.22101	8.55067	8.88321	8.43348	9.19341	8.41241	8.51129	8.32867	8.76255	10.1758	8.7503	8.97452	9.39757	8.20302	8.87503	7.95264	8.49233	9.08213	8.1715	8.18109	9.69214	10.007	10.0558	10.2172	10.2172	8.60538	10.5558	7.99324
SVIP	6.32212	6.41044	6.91611	7.04153	7.17242	7.17608	7.33474	6.67428	6.80172	7.15942	6.95661	7.2949	7.00711	6.01967	7.10339	7.05812	6.40586	6.96584	6.9776	7.55165	7.51072	6.49051	7.86101	7.21718	7.23772	7.30963	6.87293	7.21277	7.69699	6.64179	7.40367	7.86838	7.20534	7.71137	7.04724	7.18086	6.66791	7.01379	7.25213	6.87975	7.11388	7.64572	7.89373	7.79416	7.90501	8.23524	7.23733	7.69591	6.57445
SYNE3	3.67446	3.93535	3.2087	3.43118	3.44273	3.30619	3.42217	3.34268	3.46457	3.85113	3.43204	3.50507	3.45289	3.73617	3.34144	3.87974	3.32493	3.51041	3.39356	3.40076	3.66234	3.49145	3.40847	3.51636	3.43511	3.29462	3.43929	3.52689	3.5227	3.48852	3.30598	3.47488	3.65184	3.46634	3.71968	3.49901	3.47912	3.37171	3.52529	3.98941	3.88829	3.27672	3.35058	3.31815	3.32931	3.52463	3.78021	3.47934	3.74512
TBC1D20	6.12097	6.1219	6.00468	6.094	5.74528	5.88635	6.40521	6.56105	6.05355	5.99152	6.17394	5.94459	6.0323	6.37181	5.91064	6.06141	6.10091	5.73922	6.03085	6.03085	5.73108	6.15203	6.4394	6.29873	5.9654	5.85491	6.18292	6.15682	6.15557	6.00322	5.97594	5.91671	5.91926	5.64949	6.19586	6.1359	6.07374	6.05575	5.74394	6.14428	6.00407	6.10761	5.97105	6.02449	5.8366	5.62467	6.02343	6.06885	6.38547
TET1	3.84947	4.4037	3.92335	3.9631	3.80293	3.90496	3.9286	3.45566	2.70678	3.63836	3.27411	4.02657	3.22558	3.146	3.93403	4.4627	3.96914	3.46085	4.50884	3.32602	3.67525	3.97309	4.16285	3.67497	4.11373	3.33838	3.52778	4.13712	3.65759	4.8361	3.26717	4.71812	4.0088	3.76887	3.27829	4.08215	3.39048	3.65305	3.04546	3.57669	3.97529	3.01544	3.05305	3.00019	3.10585	3.12162	3.55594	2.67425	3.69222
TET2	5.4147	6.07401	5.54754	5.29424	5.75496	5.39322	5.37661	5.2294	5.11805	5.41922	5.28987	5.44192	5.30671	5.26636	5.58793	5.37372	5.14889	5.43336	5.51406	5.19651	5.68133	5.56147	5.80867	5.48595	5.77128	5.36719	5.72288	5.43284	5.44775	5.0191	5.14836	5.70096	5.31033	5.16072	5.25359	5.09502	5.34537	5.18376	5.08595	5.62303	6.11377	4.67758	4.49946	4.83721	4.77542	4.53917	5.73024	4.61075	5.56562
TET3	5.03691	5.17434	5.15097	5.16958	5.31676	5.26451	5.31148	4.98953	5.05289	5.26237	5.1016	5.1451	5.19623	5.16125	5.16072	5.00635	5.12402	5.23195	5.19862	5.10737	4.92843	5.31517	5.41062	5.29473	5.28575	5.22858	5.22346	5.30617	5.39946	5.19967	5.34466	5.17324	5.29785	5.08804	5.20105	5.17188	5.2133	5.19185	4.90831	5.09553	5.08543	5.14755	4.96063	5.2299	4.91362	4.91526	5.27535	5.00286	5.43786
TFG	5.83884	6.11833	5.73456	5.85824	6.17698	6.10064	6.19812	5.97419	5.86585	6.20017	5.87338	6.25506	5.93547	5.69	6.35786	5.80703	5.80617	6.06772	5.93354	5.86411	5.74584	5.78893	6.61931	6.01577	5.89869	5.83884	5.87087	6.064	5.65107	5.84905	5.98355	6.18206	5.78247	5.77426	6.20821	5.58928	5.81609	6.17975	5.74423	5.7252	5.83579	5.55875	5.88834	5.78304	5.89157	5.98248	6.31332	5.86411	6.13976
TGFA	6.30676	6.15924	5.33228	5.41306	6.07256	6.07087	5.45306	4.91964	5.07532	5.40137	5.57389	6.40521	5.36057	4.86323	5.59632	4.66677	5.42507	5.79976	5.51434	5.46024	5.47642	5.21174	6.27551	6.23637	5.79249	5.91815	5.50583	6.34098	5.97827	5.67101	5.28462	5.29608	5.48077	5.59305	5.14144	5.4797	5.24837	5.38549	5.39632	5.32472	5.27006	5.48166	5.7035	5.51378	5.44722	5.75826	5.45385	5.27807	5.71502
TH	3.34957	3.24418	3.21666	3.2917	3.1946	3.24773	3.17608	3.17832	3.53119	3.22004	3.3075	2.84148	3.31253	3.18964	3.23066	2.94683	2.85313	3.1462	3.00508	3.21834	3.1728	3.27281	2.88545	3.28398	3.2095	3.32562	3.32811	3.47669	3.29213	3.31401	3.22361	3.02318	3.25647	3.25181	3.3079	3.22748	3.09954	3.19414	3.37151	3.38012	3.43441	3.35866	4.10272	3.70805	3.78539	3.24954	3.40439	3.49607	3.05305
THBS1	7.16837	7.79112	7.32145	6.70323	7.29437	6.43166	6.94693	8.47348	7.80428	7.22613	6.81545	6.83293	8.03599	7.50924	7.13906	6.33184	6.7632	6.62854	7.05001	6.88376	7.35437	8.06469	7.6791	6.93968	6.75011	6.27463	7.9211	6.9176	6.67215	7.20229	6.90729	7.0388	6.90427	6.37857	8.22759	6.43971	7.23043	7.43436	7.15368	7.22877	8.08407	5.08349	4.78222	4.65541	4.64156	4.55423	7.36024	4.48047	8.37803
THBS2	11.7972	11.9336	12.3665	12.5428	11.7439	11.9641	13.0243	11.49	11.1589	9.28621	11.1218	10.5599	11.635	11.5335	11.8281	10.1962	12.1029	11.6937	12.1784	11.6474	11.7192	12.6683	12.3022	12.1784	11.7972	11.0626	11.9641	12.1784	12.0823	13.3813	10.8985	12.2808	11.857	10.8935	12.9812	12.3236	11.9493	12.3665	11.7562	8.53027	8.71547	6.58536	6.49611	6.77215	6.47159	6.61089	7.43974	6.34313	11.3398
THSD4	4.24518	4.20156	4.20024	4.22451	4.3648	4.47578	4.60762	4.68664	4.04971	4.13769	4.44802	4.20465	4.50471	4.19992	4.12859	4.43439	4.82181	4.38863	5.04364	4.5247	4.88423	4.38418	4.52903	4.50137	4.51917	4.64047	4.44047	4.80124	4.62302	4.55232	4.11344	4.65541	4.62002	4.44748	4.26658	4.69529	4.40341	4.55707	4.1057	4.08215	4.03376	3.79379	3.82234	3.77207	3.63666	3.80729	3.99244	3.78021	4.39715
THSD7A	5.28676	5.29965	4.93035	4.79187	4.87112	4.92044	5.18198	6.70505	5.01566	4.83955	5.32189	4.62033	5.86186	6.22959	5.2195	6.68613	5.54885	5.73052	5.36984	5.19478	5.91088	5.44901	5.99603	4.69282	5.84024	4.93915	5.99128	5.69954	4.65592	4.77066	4.95738	5.17017	5.02161	6.14033	5.52344	5.3469	5.36103	5.44515	5.39754	5.35463	5.39529	3.64317	3.71669	4.04806	4.01421	4.06528	4.72507	3.37567	5.62362
THSD7B	3.85382	3.81882	4.82238	5.06884	5.01211	5.11923	5.76424	4.07838	4.07113	4.67574	4.65319	3.62886	4.67574	4.4505	4.73411	4.78329	4.54399	5.1084	4.58463	4.87303	6.88531	4.94733	3.79928	5.4569	5.95605	4.69119	5.63454	4.70383	5.55793	5.21894	4.11949	5.96412	4.90633	4.30271	4.61926	6.13911	4.98703	5.29265	4.29347	3.6778	3.45175	3.71197	3.90265	3.44652	3.38918	3.48057	4.36401	3.53073	4.90719
TMCC1	5.92519	5.85055	5.95972	5.78591	6.2263	6.06458	6.1115	5.61644	5.64182	5.82339	5.74121	5.81749	5.95633	5.89157	5.95293	5.93148	5.92161	5.84766	6.13162	5.81303	5.88484	5.92959	6.40767	6.15623	5.98744	5.56067	5.96991	6.25354	6.00291	6.1964	5.79311	6.07971	5.73349	5.75443	5.99351	6.02269	5.72801	5.76855	5.63287	6.05484	6.02121	5.8956	5.6803	5.94877	5.72403	5.87485	5.61238	5.59461	5.78395
TMED10	8.74144	8.69931	8.95041	9.00945	8.81192	8.96613	9.13318	8.89685	9.30411	8.88695	8.90287	9.05576	9.14686	8.86505	8.77252	9.06843	9.12721	8.96478	8.89442	9.51406	9.13923	8.88574	8.48594	9.00668	9.02113	9.52485	8.91408	9.04849	8.87839	8.92749	9.92032	9.17624	9.32213	9.28977	8.98019	9.06153	9.03277	8.95705	9.36433	8.68317	8.63252	10.3365	10.5644	10.3726	10.3726	10.2034	8.92502	10.4236	8.79631
TMED2	9.37391	9.81205	9.89759	9.74586	9.62874	9.60203	8.9635	9.258	9.95028	8.96925	9.29949	9.53162	9.57971	8.83133	9.76558	8.63759	9.27262	9.79463	9.07589	9.86262	9.50631	8.96076	9.24624	9.5044	9.22941	9.87365	9.61091	9.45485	9.11983	8.64473	10.4307	9.79463	9.61513	9.70281	9.35574	8.77122	9.45072	9.32038	9.87897	8.96076	9.28095	11.0421	10.9987	11.1014	11.1434	10.8202	9.00383	10.7813	9.02696
TMED3	4.76148	4.78715	4.97987	4.76318	4.79549	4.7319	5.11805	4.63371	4.67574	4.8118	4.71205	4.82358	4.72209	4.57424	4.91307	4.53241	4.68376	4.62669	4.76232	4.85492	4.6825	4.78382	5.19914	4.94426	4.79405	4.91144	4.6365	4.4659	4.67293	4.80482	5.09828	4.80953	4.81378	4.79405	4.67945	4.76261	4.75296	4.65106	4.99624	4.69063	4.60848	5.72344	5.59039	5.98842	5.85577	5.79758	4.62202	5.27948	4.74523
TMED9	8.27528	8.11416	8.11351	8.17074	8.05981	7.98527	8.43771	7.70247	8.26284	8.04273	7.95049	8.06119	8.18921	7.93218	8.31423	7.45929	7.93998	8.24788	7.86216	8.17591	7.86967	8.02053	8.11881	8.50953	8.06194	8.3535	8.06935	7.94303	8.04003	8.17001	8.37467	8.04603	7.96422	8.13481	7.97464	8.01183	8.16178	7.94245	8.30787	7.9635	8.00016	8.95169	8.87944	8.87608	9.01573	8.74502	7.78494	9.00259	8.01581
TMEM115	6.35225	6.40436	6.54626	6.39302	6.1851	6.33497	6.54181	6.86117	6.28374	6.36564	6.53419	6.53226	6.5348	6.67008	6.54793	6.76785	6.4656	6.18292	6.55941	6.38457	6.56167	6.45807	6.57373	6.37269	6.3266	6.13251	6.53096	6.26023	6.4895	6.39143	6.1478	6.29487	6.30274	6.27707	6.41855	6.79327	6.56167	6.33563	6.28473	6.49311	6.29097	6.5067	6.82304	6.44966	6.20969	6.51165	6.22356	6.45742	6.40553
TMEM165	5.92161	5.96162	5.84135	5.79007	5.56507	5.68627	5.99152	5.73672	5.80894	5.77914	5.79122	5.67596	5.77074	5.67024	5.66996	5.20952	5.50961	5.96676	5.56887	5.56807	5.46267	5.59878	6.18427	5.80181	5.614	5.67626	5.60445	6.00668	5.90731	5.24747	5.7384	5.36057	5.65221	5.53885	5.69168	5.468	5.77729	5.74611	5.72143	5.53537	5.611	5.62467	5.75021	5.56536	5.84687	5.73539	5.66352	5.8169	5.80532
TMEM199	5.8927	5.89455	5.67919	5.75412	5.90731	5.92519	5.66411	5.62887	5.69084	6.06428	5.82428	5.80313	5.8339	5.64896	6.05884	5.82092	5.94649	5.8571	6.01186	5.88544	5.84252	5.84412	5.67946	5.73243	5.87729	5.56091	5.88405	5.904	5.73133	5.9716	5.70096	5.88919	5.99351	5.94034	5.93809	5.79947	5.93836	5.73483	5.95041	6.06515	6.0794	5.66267	5.88754	5.84107	5.76289	5.87087	6.07197	5.5938	5.87458
TMEM258	10.7343	10.675	10.5301	10.6046	10.4198	10.4307	10.5813	10.251	10.6381	10.6381	10.483	10.5342	10.6287	10.8081	10.4272	10.6559	10.5045	10.314	10.4163	10.6838	10.4125	10.5301	10.5813	10.7401	10.6982	10.745	10.483	10.3026	10.3681	10.1927	10.8825	10.5723	10.4579	10.5558	10.3644	10.3799	10.6335	10.4004	10.8081	10.4344	10.5342	11.3939	11.3477	11.32	11.3855	11.49	10.4873	11.357	10.3365
TMEM59	7.34198	7.59226	7.91842	8.03811	7.45148	7.68587	8.40667	7.43579	7.81724	7.99632	7.60885	7.75159	7.78153	7.51823	7.83821	7.70787	7.91973	8.09959	7.98096	7.91407	8.06404	7.51338	7.79768	7.50972	8.18921	8.31659	7.83515	8.1114	8.10793	7.51522	8.21137	7.72686	7.6638	7.96748	7.52687	8.09428	8.13121	7.82609	7.9272	7.47358	7.65552	8.12098	8.50859	8.19864	8.2367	8.21646	8.05913	8.18339	7.39583
TMEM97	6.0155	6.00525	7.09055	7.08726	8.15539	8.05195	5.98326	5.70628	9.63069	6.41915	6.48849	7.17608	9.40336	6.19291	8.2793	6.05121	8.5294	8.54661	7.73871	9.55143	6.85156	7.11682	5.85164	7.53422	6.94899	9.67914	6.46214	7.08893	6.62235	7.64514	10.3644	7.44508	8.8063	9.61977	6.09729	6.84169	6.34961	7.16951	9.57314	5.87367	5.84603	10.9421	10.8985	10.9621	10.8659	11.0288	5.88432	10.8349	6.11502
TMTC1	6.38926	6.46087	5.31033	5.52886	4.86407	5.07099	6.38605	6.43873	7.09018	5.65891	5.98552	5.58279	5.13878	6.07312	4.95296	6.66592	5.81835	5.32083	5.39864	5.43207	5.87115	5.95861	4.7499	4.45904	4.94134	5.35026	5.6573	5.42088	4.80294	5.10816	5.4336	5.4289	5.49802	5.72857	6.02987	5.98496	6.33848	5.53667	6.16284	8.00817	7.63508	4.60303	5.06637	4.63173	4.65184	4.83955	5.51068	4.63007	6.35502
TMTC2	6.0946	6.10091	7.25907	7.14647	6.89197	6.85767	6.80858	7.10428	6.52993	6.36476	6.4938	6.97124	7.25907	6.37671	6.41044	6.20111	7.01194	6.70081	7.26957	6.7772	7.22701	7.15906	7.21849	7.3585	6.77215	6.66971	7.08275	7.51019	7.27909	6.76459	6.45418	7.155	6.85377	6.86883	6.28652	7.52911	6.58896	6.67732	6.60448	5.09082	5.09362	6.11237	6.2205	6.11069	6.16316	5.67896	6.04404	6.08915	6.83255
TMTC3	6.27123	6.34406	6.48656	6.1228	6.65202	6.17156	6.07666	6.30931	5.87672	5.59435	5.90234	6.0743	6.16431	5.89783	6.40464	5.9805	6.00554	5.55471	6.25933	5.77619	6.1987	6.24364	6.83293	6.22212	6.01346	5.48022	6.24041	6.04712	5.75717	6.29773	5.77367	6.15588	5.8172	5.71725	5.96757	6.1675	5.8684	6.16923	5.67347	5.91983	6.09205	4.76397	4.86725	4.80069	4.85201	4.89494	5.7091	4.63371	5.93894
TMTC4	4.86323	4.94054	5.71474	5.88293	5.88119	6.03115	5.48405	4.75871	4.89331	4.99222	4.90396	5.17129	5.4878	4.95766	5.93779	4.6724	5.26555	5.99693	5.33704	5.42139	5.011	5.3667	5.07017	5.19587	5.19047	5.51495	4.87141	5.81111	6.21638	5.10559	5.09362	5.70628	5.82005	5.27535	5.45784	5.27948	5.0651	5.17959	4.84343	5.10103	4.94287	5.26395	5.09388	5.46349	5.48756	5.3232	4.97045	5.25799	5.12352
TP63	4.27068	4.43638	3.47335	3.45929	3.08916	3.12033	3.21666	3.19394	3.05614	3.10256	3.13187	3.12936	3.24917	3.0435	3.16795	3.10055	3.22472	3.16662	3.02378	2.99576	3.43578	3.29192	3.88653	3.27025	3.12998	3.09652	3.08352	3.18634	3.20192	3.13666	3.16855	3.05895	3.22845	3.06807	3.21158	3.2173	3.15086	3.09954	3.12956	3.12085	3.23047	3.11458	3.14317	3.0395	3.12321	3.08332	3.3188	3.008	3.18773
TRAK1	6.59439	6.67106	8.13192	8.2785	7.9211	8.1539	7.32329	7.10837	6.82965	6.93592	7.44908	7.44553	6.96183	6.78424	7.79228	6.82233	7.09898	7.5042	6.86951	6.92403	8.12512	7.09087	6.80609	6.94421	7.51072	7.4076	7.1769	7.54242	7.74407	7.69031	6.7304	7.79287	7.60302	7.70411	7.43127	7.81724	7.42647	6.98461	7.2727	6.99444	7.04388	6.55363	6.85527	6.24041	6.87784	6.66336	6.48624	6.98185	6.75011
TRAK2	8.07286	7.81142	7.94245	8.04342	8.13267	8.11817	7.59372	8.12852	8.75275	8.47786	8.50609	8.13058	8.71096	8.19934	8.11881	8.16654	8.65742	8.41782	8.62455	8.60912	8.60814	8.09179	7.27862	8.43771	7.90832	8.35264	7.96559	8.21951	8.21646	7.39071	8.24181	7.83444	7.77799	8.04743	8.1862	8.13192	7.94245	8.15254	8.43348	8.34616	8.24042	8.00282	8.14767	8.24254	8.32128	8.38818	8.39891	8.3535	8.39712
TRAPPC1	8.08474	8.19934	7.97464	8.08139	7.71189	7.80608	7.84337	7.79112	8.09696	8.29055	8.33111	8.02447	8.22966	7.81088	8.09833	7.9211	8.1546	8.12385	8.11351	8.20898	7.76215	8.29596	8.14831	7.80373	7.9272	8.23122	8.09959	7.78668	7.85029	7.92409	8.00937	7.73748	7.96941	7.76967	8.3618	7.77695	8.1539	8.19146	8.12304	8.39891	8.26015	8.17221	8.006	8.0772	7.76163	8.03945	8.25761	7.98394	8.31104
TRAPPC10	6.56073	6.55223	6.17251	6.17093	6.04461	6.07489	5.8627	6.51423	6.05973	6.69813	6.45128	6.12905	6.27985	6.54922	5.98686	6.2281	6.23554	5.83524	6.16162	5.78503	5.90671	6.57202	5.9307	5.81777	6.16631	6.094	6.6298	5.92111	5.84361	5.95633	5.95633	5.99981	5.88516	5.7271	6.27707	5.9938	6.55124	6.39719	5.87645	6.36776	6.54319	4.82328	5.13435	5.05937	4.70356	4.69282	7.11934	5.12893	6.54982
TRAPPC2	5.09553	5.06063	5.08595	5.04872	5.16271	5.06454	5.04198	5.0406	4.94081	5.2353	5.32267	4.92381	4.88625	5.06884	5.10582	5.25041	5.01969	4.63152	5.14347	4.81235	4.87874	4.99297	4.96608	4.81543	5.1022	5.17599	4.84708	4.99909	5.34765	4.93092	4.86807	5.1016	4.79022	5.01312	4.99348	5.05013	5.01074	4.9582	4.82299	5.28753	5.20021	4.61696	4.46469	4.83118	4.86018	4.51486	5.33679	4.92785	4.93465
TRAPPC2L	5.96964	5.63563	5.80123	5.75964	5.82627	5.75185	5.83771	5.7767	6.03012	5.85851	6.01293	5.80265	5.97105	6.19897	5.8339	5.9938	6.05391	5.97077	5.94293	6.00069	5.77729	5.74637	5.62086	6.03034	5.77936	6.00495	5.7409	5.67233	5.85878	5.67786	6.14033	5.73949	5.69981	5.90644	6.02269	5.73349	5.96846	5.85962	6.06202	5.9145	5.8339	6.67072	6.47096	6.67141	6.63434	6.62235	5.91389	6.49744	5.78421
TRAPPC3	8.16372	8.05583	8.1155	8.26521	7.82909	7.87532	8.26359	7.94194	8.12714	7.91206	7.92409	8.04875	8.12385	7.97267	8.24042	8.11817	8.21802	8.11351	8.16372	8.15539	7.75567	7.96997	8.02447	7.91272	7.69246	7.98394	7.92038	8.07861	8.22759	8.80716	8.09103	7.61272	7.72052	8.1899	7.6786	8.16802	8.1155	8.08671	8.04743	8.12714	7.95264	8.26434	8.38984	8.37719	8.45075	8.20155	7.75627	8.39471	7.94849
TRAPPC4	6.87145	6.53713	6.68209	6.8681	6.7757	6.75906	6.58186	6.5319	6.58729	6.86709	6.99011	6.92024	6.98545	6.9081	6.32628	6.65894	6.78211	6.70467	6.9639	6.90238	6.70112	6.53291	6.4516	6.79613	6.71656	7.15162	6.79768	6.70647	7.17732	6.79613	6.85845	6.70755	6.76251	7.17608	6.68348	6.65962	6.61373	6.78493	6.71902	6.66299	6.45418	7.11639	7.25907	7.18041	7.19262	7.0885	6.63781	7.21801	6.72364
TRAPPC5	7.77859	7.86905	7.71529	7.45821	7.82845	7.60624	7.15073	7.4615	7.35901	7.95333	7.9211	7.6312	7.6791	7.73281	7.56607	7.22877	7.62088	7.57145	7.76283	7.69913	7.49408	7.65057	7.65829	8.32948	7.60885	7.45006	7.7965	7.5971	7.80373	7.3522	7.51126	7.72167	7.24471	7.4916	7.55926	7.28975	7.77917	7.63004	7.28403	7.78612	7.91775	7.99511	7.62948	7.8964	7.71931	7.7751	7.91138	7.7481	7.8203
TRAPPC6A	6.69324	6.68034	6.77608	6.72195	7.34531	7.19348	6.47847	6.62365	6.74658	7.165	6.95313	6.91074	6.9473	7.29672	7.21006	6.76532	7.18887	7.44602	6.99841	7.0233	6.85845	7.02677	6.39814	7.02947	7.38729	7.01975	7.01454	6.70357	6.95468	7.88107	7.10512	7.44703	6.81812	6.94608	6.67898	6.76077	6.92758	7.13468	7.13227	7.03361	6.96584	7.55109	7.30883	7.58543	7.31574	7.27357	7.34861	7.12983	6.62921
TRAPPC6B	7.45537	7.42889	7.54683	7.51174	7.43485	7.43127	7.5776	7.71137	7.13724	7.64949	7.58952	7.42889	7.56713	7.33257	7.23303	7.64233	7.40888	6.98577	7.73988	6.99444	7.28808	7.32818	7.23951	7.66047	7.18003	7.19659	7.49498	7.52228	7.55753	7.59276	7.08893	7.23643	7.39157	7.35172	7.42165	7.50273	7.53113	7.4634	7.02291	7.76568	7.73871	7.05737	7.10837	7.33216	7.25695	6.70647	7.68918	6.89972	7.37469
TRAPPC9	5.02745	5.07638	5.04582	5.36268	5.15857	5.20049	5.46748	4.99324	5.48545	5.01048	5.14218	5.17841	5.27618	5.42967	5.26395	4.9588	5.10385	5.4878	4.9199	5.55903	5.1346	5.10634	5.11599	5.4835	5.11832	5.59544	5.27807	5.25334	5.17735	5.24269	5.38703	5.14805	5.17324	5.53262	5.43041	5.08999	5.26237	5.21226	5.43979	5.16741	5.17488	6.05548	6.19467	5.85851	5.97535	5.86186	5.23404	6.22212	5.07046
TRIM13	6.8472	6.75941	6.77493	6.82197	6.70541	6.54922	6.11742	6.39143	6.39634	6.87219	6.84024	6.52441	6.84651	6.42884	6.88531	6.82792	6.83557	6.52079	6.76183	6.56319	6.85338	6.4656	6.49779	6.5767	6.53226	6.64272	6.67534	6.66904	6.86883	6.52794	6.13097	6.79841	6.28564	6.6134	6.58663	6.7622	6.94816	6.58122	6.27866	7.11214	6.91984	5.63399	5.63967	5.82064	5.47588	5.43434	6.64119	5.83631	6.38926
TTYH1	3.62374	3.80957	3.8828	3.86198	3.87671	3.8642	3.96088	3.88364	4.35037	2.93172	3.38768	3.3431	4.35354	3.77034	4.97068	3.7253	4.34681	4.07035	4.44015	5.14347	3.71744	4.13598	3.47423	3.7696	3.94258	4.51545	3.54565	3.59502	3.45069	4.72944	4.90504	3.93109	4.47091	4.43527	3.9303	3.70706	3.66811	3.92732	4.54954	3.38684	3.66788	4.93497	4.8909	5.07314	5.27188	5.16908	3.59975	4.96958	3.6657
TUBA1A	11.9787	11.8422	12.0125	11.7562	12.1969	11.9787	11.612	12.2808	11.857	11.5222	12.5187	11.3939	12.1029	12.1784	11.2949	11.9641	11.7562	11.5016	11.9951	11.5434	11.871	12.1418	11.083	11.8281	11.2949	11.0949	12.3022	12.0823	11.4321	12.4127	11.0683	11.9178	11.705	11.2174	12.0125	11.9336	11.8422	12.1969	11.3855	11.5222	11.4418	10.0127	10.0781	9.92032	9.5708	9.68133	11.4596	10.3291	12.1784
TUBA1B	11.0683	11.083	10.6982	10.66	10.9039	10.9373	10.7755	10.6095	10.5386	10.7235	10.9621	10.4543	10.5386	10.7343	10.483	10.4664	10.6476	10.5386	10.509	10.4424	10.6244	11.1589	11.2021	10.5599	10.7656	10.4385	11.0557	10.9373	10.5948	10.9559	10.2034	10.9559	10.5386	10.3504	11.1014	10.745	10.7755	10.6244	10.3464	11.129	11.2608	9.46258	9.19173	9.258	9.18857	9.09627	10.4959	9.5774	10.8935
TUBA1C	12.7331	12.8185	12.435	12.3665	12.5187	12.6046	12.6908	12.2398	11.8142	12.5428	12.5428	12.2398	11.7562	12.3022	12.1784	11.857	11.7972	11.8281	11.6937	11.5762	12.3236	12.7331	13.0454	12.2177	12.3665	11.5877	12.715	12.5834	12.3022	12.5637	11.1733	12.4975	11.871	11.6937	12.838	12.3665	12.3665	12.1029	11.3671	12.5637	12.6483	10.5426	10.179	10.2583	10.0982	10.1203	12.0125	10.675	12.4975
TUBA3C	7.05379	6.84128	6.54045	6.72333	6.70112	6.71334	6.65757	6.7779	6.94461	6.59406	6.90354	6.77138	6.85087	7.05737	6.75591	6.16601	6.64869	6.64733	6.61532	6.74907	6.62696	6.7675	6.96826	6.7779	6.61373	6.93289	6.70467	6.55055	6.71263	6.89306	6.86673	6.91311	6.69291	6.7675	7.0712	6.32023	6.95275	6.73307	7.0496	6.56839	6.47226	7.37953	7.68032	7.7591	7.77188	7.69748	6.55812	7.53113	7.14423
TUBA4A	8.8702	8.87503	8.59086	8.61485	9.42657	9.31119	9.54937	8.13622	7.99063	9.31504	8.84976	9.22941	8.40992	8.64137	9.17471	8.58278	7.7892	8.45253	8.06051	7.97464	8.53311	8.49837	9.28095	9.46677	8.95169	8.23808	9.62205	9.15288	8.66648	9.21743	7.45389	9.06014	8.46558	8.11281	8.33264	8.56838	8.87391	8.53962	8.4326	8.61775	8.67633	7.06383	6.69776	7.7833	7.54242	7.41037	9.39757	7.6908	8.88074
TUBA4B	5.86299	5.56971	5.54097	5.74853	5.70688	5.82485	5.88212	5.51725	6.16803	5.54069	5.5191	5.69681	5.76509	5.72681	5.74254	5.38813	5.34716	5.81749	5.35026	5.91595	5.33439	5.57025	5.76855	5.81835	5.64847	5.88754	5.61535	5.79222	5.81526	5.86949	6.15234	5.61293	5.60836	5.69113	5.98099	5.68002	5.72432	5.7038	6.34681	5.65463	5.68185	6.66552	6.59127	6.80642	6.56872	6.9013	5.87338	6.678	5.73892
TUBA8	3.61021	3.58294	3.50124	3.57411	3.33895	3.74361	3.66989	3.45331	3.89538	3.58294	3.55476	3.26118	3.36332	3.95005	3.80004	3.56089	3.34996	3.95321	3.49145	3.63286	3.35574	3.59432	3.69569	3.54966	3.52115	3.49004	3.52045	3.43665	3.72476	3.69962	3.61875	3.7253	3.49858	3.69694	3.85167	3.59571	3.77485	3.5764	3.54152	3.32752	3.58592	4.1811	4.14739	3.67446	3.70577	3.94528	3.2694	3.74242	3.58216
TUBAL3	2.64729	3.0914	3.04965	2.75488	3.82453	4.04467	2.99214	3.04447	2.89128	2.95813	3.00939	4.39006	2.7874	3.00958	2.78666	2.79919	3.02972	2.70614	2.91331	2.64605	2.95156	2.75373	4.06427	2.78202	2.8401	2.65589	3.12632	3.13553	4.06398	3.33895	2.96203	3.71511	2.78153	2.82043	2.63622	2.92895	2.66947	2.78666	2.98333	2.60547	2.66794	3.02199	2.78641	2.52468	2.76092	2.92323	2.57675	2.83282	2.94946
TUBB1	4.2712	4.12222	3.06864	2.97507	3.22173	3.11055	3.07681	3.90138	3.3205	3.28484	2.94787	3.27956	3.15367	3.18985	3.16003	3.19437	3.08311	2.80907	3.0156	2.9531	2.96344	3.34035	2.98399	2.76917	3.16999	3.10256	2.99301	3.07662	3.0102	3.0369	3.18433	3.04588	3.13371	3.14275	3.0301	3.11836	3.02562	3.19285	2.92087	4.55175	4.54315	3.09161	2.98505	3.0914	3.00526	3.07642	3.21257	2.97668	3.36352
TUBB2A	7.88352	7.85427	8.28485	8.15618	7.97855	8.0701	8.19211	8.74624	8.97881	7.20362	7.92038	7.92038	8.4074	7.90957	7.60989	7.7096	7.89971	7.82909	7.94487	7.84521	8.08348	8.17877	8.441	8.01314	8.20898	7.95464	7.82083	8.31104	8.24329	8.50953	7.76038	8.50047	8.03114	8.17877	7.97668	8.30328	8.01854	8.20302	8.17517	7.18804	7.26295	8.1715	8.11205	8.48507	8.40826	8.94919	7.62139	9.11326	8.32308
TUBB2B	4.2395	4.0843	4.96849	4.79731	6.33465	6.11775	4.76174	4.93497	5.88183	4.81154	5.05478	5.34921	6.26524	4.70522	4.51653	5.32423	5.13773	4.73987	6.35502	4.96772	5.48939	6.28074	4.38307	5.13749	5.60594	4.6606	4.56041	6.03547	4.66286	4.83899	4.66677	4.81568	4.99348	5.20347	4.227	5.34537	5.34765	5.2865	4.93967	3.68914	3.82453	4.15639	4.16059	4.45536	4.22724	4.70802	4.9139	4.93578	5.17044
TUBB3	9.13466	9.17303	9.40336	9.29487	9.44677	9.42319	9.26617	9.74837	9.40911	8.75379	9.43556	9.38874	9.23996	9.19341	9.49112	8.66943	8.88208	8.88945	8.82265	8.63454	8.94919	9.48689	9.76558	9.24306	9.37029	8.65436	9.33769	9.47085	9.10734	9.53162	8.40912	9.18698	8.87839	8.6102	9.43556	9.22631	9.39419	9.19972	9.01439	8.94272	8.99739	8.58704	8.37003	8.59086	8.67427	8.71096	8.68637	8.87391	9.30753
TUBB4A	3.1935	3.45866	3.18773	3.17891	3.33222	3.2103	2.93837	2.97444	3.4787	3.64052	3.66989	3.41086	3.69248	3.78021	3.50327	2.89596	3.72228	3.60618	3.52092	3.31484	3.62462	3.45434	3.38336	3.42241	3.47175	3.39048	3.45418	3.23629	3.59857	3.536	3.66234	2.95416	3.3646	3.21564	3.29933	3.07142	3.13433	3.23876	3.5062	3.898	3.96938	3.65641	3.88227	3.76559	3.32772	3.60186	3.19243	3.45331	3.71793
TUBB4B	9.83833	9.81728	9.95028	9.7129	9.95305	9.86769	9.72828	9.97895	9.66929	9.38698	9.92899	10.0722	9.55581	9.73572	10.2103	9.18076	9.29131	9.5864	9.16059	9.17787	9.58836	9.62394	10.5908	9.64446	10.0914	9.41797	9.78732	9.87897	9.82861	10.149	9.04458	9.46862	9.47919	9.3594	9.85995	9.76761	9.90292	9.55378	9.27566	9.88709	9.81728	9.19496	9.02113	9.38698	9.36433	9.22778	9.27262	9.34465	9.71023
TUBB6	7.50972	7.58114	7.29386	7.09854	7.18132	7.26472	7.18132	8.93747	8.37467	7.63965	8.27688	7.07276	7.72279	8.0192	7.41509	7.63734	7.85163	6.99534	7.54895	7.37237	7.59013	8.15325	7.97977	7.68478	7.126	6.89639	7.47452	7.56289	7.05449	7.65268	7.23686	7.16371	7.34342	7.16584	7.36125	7.76399	7.86101	7.59864	7.37722	7.32679	7.33128	7.03361	6.69813	6.67664	6.60851	6.93367	8.10854	7.23686	8.20747
TUSC3	5.60232	5.72403	6.01095	6.04243	6.71546	6.72234	4.9599	6.26681	5.87754	4.86154	5.35463	5.54374	6.69633	5.59089	6.24829	6.16923	6.83959	6.21291	7.28071	7.57856	6.1866	6.01717	4.56349	6.90011	6.44512	6.53383	5.63641	6.10183	5.43948	5.57136	6.28315	6.17189	6.36303	6.78596	5.05478	5.75252	5.38946	6.29873	5.72681	5.33278	5.49048	6.10557	6.12625	6.16431	6.05005	5.94459	4.95714	6.0743	5.23774
UAP1	9.19341	9.55581	9.93806	9.74837	9.21938	9.13318	9.76558	10.5908	10.5003	8.76357	9.24476	9.62205	9.78732	9.77497	9.49469	9.89442	9.00533	9.46467	9.14543	9.54551	9.36835	10.3365	9.75815	9.38348	9.41098	9.61977	9.51206	9.04304	9.46677	9.59082	10.007	10.3681	9.77497	9.49679	9.42159	9.90015	10.0914	9.5774	10.251	7.79889	8.06727	10.4424	10.2955	10.5173	10.6194	10.6838	8.97601	9.97607	9.86769
UBA1	6.70467	6.57445	6.73802	6.9776	6.73871	7.03284	7.05737	6.56319	6.87145	6.65068	6.67996	6.58795	6.72582	6.93367	6.73242	6.53742	6.62298	6.64046	6.56287	6.73693	6.54452	7.01938	6.58378	6.75689	6.9973	7.04198	6.87897	6.77828	7.34024	6.90617	6.72302	6.63919	6.55557	6.85685	7.0451	6.99486	6.84472	6.62525	6.94816	6.80026	6.66233	6.9578	6.51036	6.80574	6.56224	6.74875	6.48303	6.89934	6.57945
UBA52	12.5834	12.5428	11.857	11.9336	11.7837	11.9493	11.8849	12.3665	12.0823	12.9216	12.6483	12.2624	11.9015	12.6483	12.2398	12.7759	12.0823	11.8849	11.8849	11.9787	12.3665	12.2398	12.5834	12.2398	12.3471	11.9336	12.4545	11.8849	12.4545	12.0823	12.0823	12.2624	11.9493	11.8849	12.2177	12.044	12.6271	12.1418	12.1969	12.7331	12.8185	12.3236	12.2808	12.435	12.4748	12.4545	12.9604	12.435	12.5834
UBB	7.12443	6.86331	7.01741	7.05891	6.9973	6.99766	7.08513	7.086	7.19703	7.05304	7.06471	7.23218	7.23218	7.06547	7.15031	7.29344	7.17152	6.97047	7.22148	7.1757	6.94045	7.13821	6.64869	6.92978	6.99883	7.22749	7.08559	6.80895	6.92439	7.28536	7.30266	7.03151	7.16879	7.20267	7.30044	6.97639	6.85884	6.92869	7.19784	7.40982	7.30688	7.70618	7.78038	7.80128	7.86524	7.7833	7.02404	7.62361	7.08808
UBC	13.9309	14.0023	13.6335	13.6051	13.4714	13.5209	14.1057	14.1424	13.3366	13.6335	13.8558	13.7242	13.4249	13.7866	13.575	13.7242	13.6051	13.4249	13.6335	13.2184	13.6051	13.694	14.2027	13.6645	13.8558	13.1318	14.0023	13.6335	13.6051	13.7866	13.0682	13.7866	13.3366	12.9998	13.9678	13.8925	13.8192	13.575	12.8185	13.6335	13.694	12.6271	12.7536	12.6271	12.6908	12.6483	13.6645	12.8185	13.7548
UBE2J1	6.77035	6.70718	6.60613	6.72364	6.57096	6.58663	6.4665	6.7359	7.05001	7.13951	6.83851	7.07476	6.91311	6.52861	6.54982	6.728	6.73409	6.52827	6.43112	6.76821	6.53226	6.87784	6.70081	6.73942	6.76459	6.85527	6.76785	6.44703	6.62666	6.21518	7.16584	6.71759	6.77647	6.56537	6.68549	6.41855	6.92439	6.66517	6.96475	6.9876	7.05449	7.29159	7.51432	7.59921	7.67809	7.59601	7.40126	7.21676	6.649
UBXN1	6.63017	6.68172	6.30304	6.22778	6.51642	6.7179	6.68069	6.5835	6.7426	6.99324	6.73942	6.59977	6.8206	6.88298	6.58663	6.76387	6.43873	6.57772	6.69258	6.60613	6.68105	6.64377	6.78071	6.48722	6.65757	6.5896	6.73009	6.4223	6.57511	6.78894	6.73009	6.71546	6.49515	6.57511	6.54922	6.6586	6.74727	6.58831	6.58831	6.82342	6.76497	7.21144	6.96549	7.13724	6.69741	6.75797	6.87712	6.92546	6.62128
UGGT1	6.49159	6.5097	6.59055	6.50697	6.36385	6.30676	6.21813	5.86475	6.53649	6.26408	6.11891	6.59869	6.32309	6.05326	6.82602	5.85934	6.35413	6.27311	6.03966	6.32843	6.1478	6.30392	6.33594	6.57741	6.55223	6.53614	6.50188	6.24603	6.36813	6.30613	6.62632	6.42917	6.51835	6.62392	6.26408	6.07489	6.45677	6.36084	6.61051	6.29	6.42564	7.31484	7.23733	7.28846	7.09342	6.78391	6.23142	7.30499	6.23982
UGGT2	4.96503	5.21764	4.9975	4.90045	5.21412	5.16527	4.73026	5.32785	4.7319	4.50804	4.63287	4.7458	4.81293	4.33194	5.22662	4.80294	4.81435	4.85201	5.05088	4.74471	5.10247	4.9779	5.05375	4.87496	4.98013	4.98177	4.81801	5.02425	5.29184	4.8401	4.75562	5.11456	4.84317	4.791	4.58629	5.01566	4.64156	4.88227	4.86154	4.91113	4.97957	4.78275	4.98494	5.24321	5.17211	4.70579	4.88336	4.72842	4.75843
UMOD	3.38812	3.39156	3.56319	3.19414	3.30877	3.35598	3.24811	3.35037	3.38381	3.46728	3.5227	3.60452	3.67042	3.60094	3.4404	3.48469	3.64029	3.56675	3.49452	3.42593	3.39681	3.24458	3.2616	3.33695	3.37371	3.5053	3.3398	3.40502	3.24001	3.36483	3.75779	3.48875	3.32537	3.53354	3.51792	3.35476	3.40528	3.25437	3.53375	3.41284	3.35268	4.11373	3.72971	4.06662	3.71641	3.76908	3.3331	3.45479	3.394
USO1	8.84742	9.00259	9.16059	9.16214	8.98019	9.04458	9.01318	8.65742	9.34814	8.72512	8.72512	8.86644	9.06843	8.72052	9.0472	8.70457	9.05732	9.33589	8.78537	9.07735	9.00668	8.84622	8.62749	9.25466	8.96478	9.49889	8.79739	8.83704	8.87608	8.3666	9.5026	9.36623	8.8302	9.00383	9.03133	8.26359	8.85793	8.81698	9.44078	8.69711	8.75275	9.67637	9.79962	9.84079	9.93246	9.96485	8.59777	9.73572	8.68952
VCAN	11.8142	11.635	12.044	12.3471	11.6818	11.7972	12.0288	11.871	11.253	10.3464	11.8422	11.2462	11.5762	11.3764	11.5653	10.7813	12.0125	11.3118	11.8281	11.1881	11.9493	12.3905	11.4696	11.7972	11.2249	10.7135	12.0288	11.871	11.8849	12.2398	11.166	11.7972	11.6474	10.6838	12.8804	12.2808	12.2177	12.5834	11.5984	8.30634	8.10854	6.34035	6.57096	6.1547	6.08624	5.7417	7.30688	6.37824	12.2177
VCP	8.1169	8.21339	8.18482	8.34214	8.05722	8.0772	8.32128	8.35522	8.7818	8.57871	8.49947	8.02053	8.58983	8.51831	8.46098	8.34379	8.45075	8.20978	8.1624	8.41516	8.31346	8.5576	8.50859	8.22901	8.53213	8.46278	8.39793	8.11416	8.64049	8.45732	8.68748	8.37894	8.18109	8.20669	8.75605	8.59173	8.50859	8.39152	8.42992	8.32055	8.46462	8.43771	8.57871	8.49837	8.55167	8.38222	8.69931	8.58983	8.41241
VEGFB	6.25781	6.49125	6.50697	6.2281	6.60249	6.56574	6.88376	7.49709	6.71832	6.65414	6.86117	6.46149	6.84472	7.82609	6.74116	6.98233	6.82563	6.79508	6.7426	6.81849	6.87712	7.12566	6.56411	6.13251	6.89197	6.83959	6.90465	6.5788	6.62854	6.82023	7.10428	6.81158	6.43655	6.82095	7.10728	6.91469	6.64119	6.69148	6.91835	6.45283	6.52116	7.42211	7.34066	7.64782	7.66706	7.74584	6.39213	7.51569	6.97331
XXYLT1	5.75359	6.16831	5.56268	5.42275	5.567	5.55134	6.03459	5.8172	5.26906	5.41848	5.7437	5.40297	5.43682	5.45945	6.0982	5.18399	5.62143	5.44323	5.54619	5.19676	5.58764	5.99779	5.73703	5.55263	5.39108	5.31824	5.67761	5.52468	5.61698	6.20883	4.98528	6.09004	5.611	5.10333	5.47697	6.01746	5.63371	5.46748	5.11706	5.79559	5.93439	5.33938	5.27454	4.79839	4.69615	5.07611	5.43128	5.2067	5.68485
YIPF1	7.52228	7.82372	7.49656	7.28722	7.01233	7.0885	8.12512	6.74591	7.18041	7.39534	7.08513	6.99247	7.20362	6.99805	7.42165	6.89498	7.04467	7.30925	7.37953	7.33711	7.1757	7.5362	7.31243	7.15654	7.27575	7.32055	7.33432	7.51973	7.45051	7.39025	7.106	7.13305	7.34112	6.86187	7.53216	7.78612	7.52911	7.2863	6.96233	7.46728	7.86101	6.74374	6.82167	7.45347	7.29437	7.04114	7.04237	6.86406	7.18757
YIPF2	6.17575	6.2205	6.37296	6.65485	6.00495	6.09344	6.36592	5.98527	6.7657	5.92251	5.95127	6.33528	6.27214	6.39634	6.22506	6.07027	6.39814	6.59679	6.18264	6.67072	6.34346	6.12216	6.48787	6.75977	6.39814	6.7408	6.22929	6.26648	6.28404	6.26709	6.83082	6.36655	6.34183	6.5767	6.14282	6.20731	6.21695	6.12793	6.7273	5.78247	5.88264	7.73402	7.82731	7.70299	7.92528	7.70029	5.61129	7.76511	5.89809
YIPF6	7.30454	7.2526	7.30183	7.27006	7.32506	7.3673	7.71416	7.19966	7.34241	6.96669	7.11723	7.28119	7.39205	6.9639	7.56289	7.14342	7.20012	7.23816	7.20012	7.22244	7.12271	7.07603	7.65444	7.62516	7.37191	7.65552	7.01617	7.35172	7.49814	7.40888	7.60511	7.45097	7.1286	7.44908	7.18439	7.36869	7.11682	7.18521	7.32592	6.96268	6.94157	7.8882	7.86644	8.11617	8.03811	7.72982	6.98971	7.75159	7.05111
YKT6	6.44075	6.38021	6.12447	6.00291	6.30359	6.36178	6.74374	6.094	6.46999	5.88697	6.09853	6.01995	6.17975	5.8781	6.42111	5.68429	6.00069	6.08545	6.00011	5.919	5.74553	6.42366	6.35726	6.66971	6.25293	6.06684	6.26858	6.2495	6.16136	5.90001	6.064	6.00814	6.04945	5.82368	6.30208	5.80645	6.21638	6.10034	5.78304	5.9966	5.89401	6.72903	6.36747	6.31301	6.67286	6.62727	5.75582	6.65414	6.1481
ZC3H12A	6.98104	6.82268	6.60279	6.75797	6.65548	6.95088	7.52554	7.52394	6.69741	6.53383	6.66031	6.72764	6.89712	6.50059	6.80207	6.47258	5.94958	6.82023	5.98355	6.36303	6.75044	6.64869	6.20282	6.07694	6.45318	5.81004	6.61567	7.12566	7.68088	7.92973	5.84713	7.27314	6.92758	6.25478	6.15407	6.91723	6.28624	6.31615	6.28564	5.50888	5.55822	3.95216	5.12623	5.20805	4.72972	4.74393	6.23637	5.31571	7.21407
[truncated: 29 more columns]
